# Supplementary material
Source: PubMed Central journal article supplement (PMC3168985)
Supplement: NIHMS304204-supplement-1_si_001.pdf [file NIHMS304204-supplement-1_si_001.pdf]

**Supplementary Table 1.** Oligodeoxyribonucleotides and PCR conditions used in the RT-PCR examination of gene expression profiles.

| Locus name | Gene name        | Forward primer       | Reverse primer        | T <sub>m</sub> (°C) | No. of cycles |
|------------|------------------|----------------------|-----------------------|---------------------|---------------|
| rrnAC2679  | <i>rimK</i>      | ACAACAGCCTCGCGTTAGAG | AGGCCTTGAATTCGACAGTG  | 52                  | 30            |
| pNG7060    | <i>fmdA</i>      | ACCTCTCGCAGGTGCACTAT | GACGGAGTAGCCACAGAAGG  | 55                  | 30            |
| pNG7370    | <i>gcvT1</i>     | ACCTTCCGTTGGTTGACAAG | CTCTAACCGATGCCTGGTGT  | 53                  | 30            |
| rrnAC0929  | <i>acaB4</i>     | CGGAACGGATGACCAATATC | ATTTCGATTGCGAACACTTCC | 51                  | 30            |
| rrnB0237   | <i>ech4</i>      | GGAGTTCAAGCAGGTCTTCG | GCATGATGCCAAGGTTGATT  | 54                  | 30            |
| rrnAC0512  | <i>tyrA</i>      | GCCGAGACTTTCGATGTTGT | TCGTAGAGCCGCTCAAAAAGT | 52                  | 35            |
| rrnAC2674  | <i>gltCP</i>     | AGTTCAACGGCGGGACAT   | ATCGGACAGTCCCACGTCT   | 54.3                | 30            |
| rrnAC0132  | <i>rrnAC0132</i> | AGTCGAGCTAGAAGGCCACA | ATGGCGTTGAGAACTTTCGT  | 53.6                | 30            |
| rrnAC2678  | <i>argC</i>      | ACAAGACTATCGGGCACTCG | CCTGCAACTGACTTGGGTTC  | 54.3                | 30            |
|            | <i>16s rRNA</i>  | ATCGGTACGGGTTGTGAGAG | GCCCAGTCCTTGTTCTGTA   | 52                  | 25            |
