# Supplementary material
Source: PubMed Central journal article supplement (PMC3168985)
Supplement: NIHMS304204-supplement-2_si_002.pdf [file NIHMS304204-supplement-2_si_002.pdf]

[illegible]











[illegible]







[illegible]



[illegible]

|                  |   |                                                                       |    |          |     |      |    |     |        |   |                                               |   |   |           |           |         |         |        |       |       |       |   |    |     |   |   |   |
|------------------|---|-----------------------------------------------------------------------|----|----------|-----|------|----|-----|--------|---|-----------------------------------------------|---|---|-----------|-----------|---------|---------|--------|-------|-------|-------|---|----|-----|---|---|---|
| EFIA_HALMAReview | 1 | Elongation factor 1-alpha (EF-1-alpha) (Elongation factor Tu) (EF-Tu) | tu | rmAC2406 | 421 | 77.7 | 27 | 132 | 1      | K | GGFEFAYVMDNLAEEER                             | G | 3 | 2131.9633 | 2131.9680 | 0.0047  | 0       | 2.20   | 3.119 | 0.33  | 824.8 | 1 | 27 | 68  | 2 | 1 | 1 |
| EFIA_HALMAReview | 1 | Elongation factor 1-alpha (EF-1-alpha) (Elongation factor Tu) (EF-Tu) | tu | rmAC2406 | 421 | 77.7 | 27 | 132 | 1      | K | AEPGDNVGFNVR                                  | G | 2 | 1273.6051 | 1273.6057 | 0.0006  | 0       | 0.47   | 1.95  | 0.47  | 229.4 | 1 | 17 | 22  | 2 | 0 | 1 |
| EFIA_HALMAReview | 1 | Elongation factor 1-alpha (EF-1-alpha) (Elongation factor Tu) (EF-Tu) | tu | rmAC2406 | 421 | 77.7 | 27 | 132 | 1      | K | AEPGDNVGFNVR                                  | G | 2 | 1273.6051 | 1273.6057 | 0.0006  | 0       | 0.47   | 2.326 | 0.403 | 188.7 | 5 | 14 | 22  | 2 | 0 | 1 |
| EFIA_HALMAReview | 1 | Elongation factor 1-alpha (EF-1-alpha) (Elongation factor Tu) (EF-Tu) | tu | rmAC2406 | 421 | 77.7 | 27 | 132 | 1      | R | DMGQTIAAGKVLGVNER                             | - | 3 | 1757.9094 | 1757.9163 | 0.0069  | 0       | 3.93   | 3.255 | 0.38  | 1113  | 1 | 30 | 64  | 2 | 1 | 1 |
| EFIA_HALMAReview | 1 | Elongation factor 1-alpha (EF-1-alpha) (Elongation factor Tu) (EF-Tu) | tu | rmAC2406 | 421 | 77.7 | 27 | 132 | 1      | K | FIPVSAFEGDNIAEESEHTGWYDGEILLLEALNELPAPEPTDAPL | L | 3 | 5048.4243 | 5049.4375 | 1.0132  | -1.0034 | 1.95   | 3.516 | 0.427 | 917.6 | 1 | 39 | 180 | 2 | 0 | 1 |
| EFIA_HALMAReview | 1 | Elongation factor 1-alpha (EF-1-alpha) (Elongation factor Tu) (EF-Tu) | tu | rmAC2406 | 421 | 77.7 | 27 | 132 | 1      | K | GGFEFAYVMDNLAEEER                             | E | 2 | 1846.8196 | 1848.2254 | 1.4058  | -1.0034 | 217.92 | 4.686 | 0.38  | 2463  | 1 | 22 | 30  | 2 | 0 | 1 |
| EFIA_HALMAReview | 1 | Elongation factor 1-alpha (EF-1-alpha) (Elongation factor Tu) (EF-Tu) | tu | rmAC2406 | 421 | 77.7 | 27 | 132 | 1      | K | GGFEFAYVMDNLAEEER                             | E | 2 | 1846.8196 | 1848.2254 | 1.4058  | -1.0034 | 217.92 | 4.22  | 0.326 | 1982  | 1 | 22 | 30  | 2 | 0 | 1 |
| EFIA_HALMAReview | 1 | Elongation factor 1-alpha (EF-1-alpha) (Elongation factor Tu) (EF-Tu) | tu | rmAC2406 | 421 | 77.7 | 27 | 132 | 0.9998 | K | GGFEFAYVMDNLAEEER                             | E | 2 | 1846.8196 | 1847.6654 | 0.8458  | -1.0034 | -85.31 | 2.824 | 0.354 | 729.2 | 1 | 16 | 30  | 2 | 0 | 1 |
| EFIA_HALMAReview | 1 | Elongation factor 1-alpha (EF-1-alpha) (Elongation factor Tu) (EF-Tu) | tu | rmAC2406 | 421 | 77.7 | 27 | 132 | 0.9953 | K | GGFEFAYVMDNLAEEER                             | E | 2 | 1846.8196 | 1847.6654 | 0.8458  | -1.0034 | -85.31 | 2.324 | 0.217 | 537   | 1 | 13 | 30  | 2 | 0 | 1 |
| EFIA_HALMAReview | 1 | Elongation factor 1-alpha (EF-1-alpha) (Elongation factor Tu) (EF-Tu) | tu | rmAC2406 | 421 | 77.7 | 27 | 132 | 0.9823 | K | GGFEFAYVMDNLAEEER                             | E | 2 | 1846.8196 | 1848.2854 | 1.4658  | -1.0034 | 250.40 | 2.214 | 0.151 | 417.1 | 1 | 13 | 30  | 2 | 0 | 1 |
| EFIA_HALMAReview | 1 | Elongation factor 1-alpha (EF-1-alpha) (Elongation factor Tu) (EF-Tu) | tu | rmAC2406 | 421 | 77.7 | 27 | 132 | 0.9816 | K | GGFEFAYVMDNLAEEER                             | E | 2 | 1846.8196 | 1848.9054 | 2.0858  | -2.0067 | 42.83  | 2.442 | 0.156 | 751   | 1 | 14 | 30  | 2 | 0 | 1 |
| EFIA_HALMAReview | 1 | Elongation factor 1-alpha (EF-1-alpha) (Elongation factor Tu) (EF-Tu) | tu | rmAC2406 | 421 | 77.7 | 27 | 132 | 1      | K | GGFEFAYVMDNLAEEER                             | G | 3 | 2131.9633 | 2131.9737 | 0.0104  | 0       | 4.88   | 3.027 | 0.319 | 870.5 | 1 | 26 | 68  | 2 | 1 | 1 |
| EFIA_HALMAReview | 1 | Elongation factor 1-alpha (EF-1-alpha) (Elongation factor Tu) (EF-Tu) | tu | rmAC2406 | 421 | 77.7 | 27 | 132 | 0.9919 | K | GKGGFEFAYVMDNLAEEER                           | E | 3 | 2031.9360 | 2030.8600 | -1.0760 | 1       | -47.25 | 3.572 | 0.233 | 698.7 | 8 | 21 | 68  | 2 | 1 | 1 |
| EFIA_HALMAReview | 1 | Elongation factor 1-alpha (EF-1-alpha) (Elongation factor Tu) (EF-Tu) | tu | rmAC2406 | 421 | 77.7 | 27 | 132 | 1      | K | GKGGFEFAYVMDNLAEEER                           | G | 3 | 2317.0797 | 2317.0830 | 0.0033  | 0       | 1.42   | 2.741 | 0.429 | 749.2 | 1 | 34 | 76  | 2 | 1 | 1 |
| EFIA_HALMAReview | 1 | Elongation factor 1-alpha (EF-1-alpha) (Elongation factor Tu) (EF-Tu) | tu | rmAC2406 | 421 | 77.7 | 27 | 132 | 1      | K | GKGGFEFAYVMDNLAEEER                           | G | 3 | 2317.0797 | 2317.0833 | 0.0036  | 0       | 1.55   | 2.703 | 0.345 | 631.2 | 1 | 31 | 76  | 2 | 2 | 1 |
| EFIA_HALMAReview | 1 | Elongation factor 1-alpha (EF-1-alpha) (Elongation factor Tu) (EF-Tu) | tu | rmAC2406 | 421 | 77.7 | 27 | 132 | 0.9946 | K | GKGGFEFAYVMDNLAEEER                           | G | 4 | 2317.0797 | 2317.0843 | 0.0046  | 0       | 1.9    |       |       |       |   |    |     |   |   |   |

|                  |   |                                                                       |    |          |     |      |    |     |        |   |                          |   |   |           |           |         |         |       |       |       |       |   |    |     |   |   |   |                              |
|------------------|---|-----------------------------------------------------------------------|----|----------|-----|------|----|-----|--------|---|--------------------------|---|---|-----------|-----------|---------|---------|-------|-------|-------|-------|---|----|-----|---|---|---|------------------------------|
| EFIA_HALMAReview | 1 | Elongation factor 1-alpha (EF-1-alpha) (Elongation factor Tu) (EF-Tu) | tu | rmAC2406 | 421 | 77.7 | 27 | 132 | 1      | K | TVEMHHEEVPKAEPGDNVGNFNR  | G | 3 | 2590.2234 | 2592.2180 | 1.9946  | -2.0067 | -4.67 | 6.098 | 0.468 | 1401  | 1 | 37 | 88  | 2 | 1 | 1 |                              |
| EFIA_HALMAReview | 1 | Elongation factor 1-alpha (EF-1-alpha) (Elongation factor Tu) (EF-Tu) | tu | rmAC2406 | 421 | 77.7 | 27 | 132 | 1      | K | TVEMHHEEVPKAEPGDNVGNFNR  | G | 3 | 2590.2234 | 2590.2268 | 0.0034  | 0       | 1.31  | 6.365 | 0.484 | 1864  | 1 | 40 | 88  | 2 | 1 | 1 |                              |
| EFIA_HALMAReview | 1 | Elongation factor 1-alpha (EF-1-alpha) (Elongation factor Tu) (EF-Tu) | tu | rmAC2406 | 421 | 77.7 | 27 | 132 | 1      | K | TVEMHHEEVPKAEPGDNVGNFNR  | G | 4 | 2590.2234 | 2590.2273 | 0.0039  | 0       | 1.51  | 3.999 | 0.371 | 1738  | 1 | 53 | 132 | 2 | 1 | 1 |                              |
| EFIA_HALMAReview | 1 | Elongation factor 1-alpha (EF-1-alpha) (Elongation factor Tu) (EF-Tu) | tu | rmAC2406 | 421 | 77.7 | 27 | 132 | 1      | K | TVEMHHEEVPKAEPGDNVGNFNR  | G | 4 | 2606.2228 | 2606.2180 | -0.0048 | 0       | -1.84 | 4.43  | 0.358 | 1049  | 1 | 44 | 132 | 2 | 1 | 1 | TVEM[147]HHEEVPKAEPGDNVGNFNR |
| EFIA_HALMAReview | 1 | Elongation factor 1-alpha (EF-1-alpha) (Elongation factor Tu) (EF-Tu) | tu | rmAC2406 | 421 | 77.7 | 27 | 132 | 1      | K | TVEMHHEEVPKAEPGDNVGNFNR  | G | 4 | 2590.2234 | 2590.2278 | 0.0044  | 0       | 1.70  | 3.669 | 0.328 | 1508  | 1 | 49 | 132 | 2 | 1 | 1 |                              |
| EFIA_HALMAReview | 1 | Elongation factor 1-alpha (EF-1-alpha) (Elongation factor Tu) (EF-Tu) | tu | rmAC2406 | 421 | 77.7 | 27 | 132 | 1      | K | TVEMHHEEVPKAEPGDNVGNFNR  | G | 3 | 2590.2234 | 2590.2271 | 0.0037  | 0       | 1.43  | 5.648 | 0.438 | 1691  | 1 | 38 | 88  | 2 | 1 | 1 |                              |
| EFIA_HALMAReview | 1 | Elongation factor 1-alpha (EF-1-alpha) (Elongation factor Tu) (EF-Tu) | tu | rmAC2406 | 421 | 77.7 | 27 | 132 | 1      | K | TVEMHHEEVPKAEPGDNVGNFNR  | G | 4 | 2606.2228 | 2606.2229 | 0.0001  | 0       | 0.04  | 3.54  | 0.295 | 890.6 | 1 | 41 | 132 | 2 | 1 | 1 | TVEM[147]HHEEVPKAEPGDNVGNFNR |
| EFIA_HALMAReview | 1 | Elongation factor 1-alpha (EF-1-alpha) (Elongation factor Tu) (EF-Tu) | tu | rmAC2406 | 421 | 77.7 | 27 | 132 | 1      | K | TVEMHHEEVPKAEPGDNVGNFNR  | G | 4 | 2590.2234 | 2590.2259 | 0.0025  | 0       | 0.97  | 3.322 | 0.272 | 1430  | 1 | 48 | 132 | 2 | 1 | 1 |                              |
| EFIA_HALMAReview | 1 | Elongation factor 1-alpha (EF-1-alpha) (Elongation factor Tu) (EF-Tu) | tu | rmAC2406 | 421 | 77.7 | 27 | 132 | 0.9999 | K | TVEMHHEEVPKAEPGDNVGNFNR  | G | 4 | 2606.2228 | 2606.2222 | -0.0006 | 0       | -0.23 | 3.069 | 0.248 | 1222  | 1 | 47 | 132 | 2 | 1 | 1 | TVEM[147]HHEEVPKAEPGDNVGNFNR |
| EFIA_HALMAReview | 1 | Elongation factor 1-alpha (EF-1-alpha) (Elongation factor Tu) (EF-Tu) | tu | rmAC2406 | 421 | 77.7 | 27 | 132 | 0.9999 | K | TVEMHHEEVPKAEPGDNVGNFNR  | G | 4 | 2590.2234 | 2590.2259 | 0.0025  | 0       | 0.97  | 2.947 | 0.253 | 1119  | 1 | 46 | 132 | 2 | 1 | 1 |                              |
| EFIA_HALMAReview | 1 | Elongation factor 1-alpha (EF-1-alpha) (Elongation factor Tu) (EF-Tu) | tu | rmAC2406 | 421 | 77.7 | 27 | 132 | 0.9998 | K | TVEMHHEEVPKAEPGDNVGNFNR  | G | 3 | 2606.2228 | 2606.2205 | -0.0023 | 0       | -0.88 | 3.921 | 0.207 | 1406  | 1 | 35 | 88  | 2 | 1 | 1 | TVEM[147]HHEEVPKAEPGDNVGNFNR |
| EFIA_HALMAReview | 1 | Elongation factor 1-alpha (EF-1-alpha) (Elongation factor Tu) (EF-Tu) | tu | rmAC2406 | 421 | 77.7 | 27 | 132 | 0.9997 | K | TVEMHHEEVPKAEPGDNVGNFNR  | G | 4 | 2606.2228 | 2606.2232 | 0.0004  | 0       | 0.15  | 3.019 | 0.235 | 899.3 | 4 | 43 | 132 | 2 | 1 | 1 | TVEM[147]HHEEVPKAEPGDNVGNFNR |
| EFIA_HALMAReview | 1 | Elongation factor 1-alpha (EF-1-alpha) (Elongation factor Tu) (EF-Tu) | tu | rmAC2406 | 421 | 77.7 | 27 | 132 | 0.9996 | K | TVEMHHEEVPKAEPGDNVGNFNR  | G | 4 | 2606.2228 | 2606.2229 | 0.0001  | 0       | 0.04  | 2.957 | 0.223 | 735.4 | 4 | 40 | 132 | 2 | 1 | 1 | TVEM[147]HHEEVPKAEPGDNVGNFNR |
| EFIA_HALMAReview | 1 | Elongation factor 1-alpha (EF-1-alpha) (Elongation factor Tu) (EF-Tu) | tu | rmAC2406 | 421 | 77.7 | 27 | 132 | 0.9995 | K | TVEMHHEEVPKAEPGDNVGNFNR  | G | 4 | 2590.2234 | 2590.2249 | 0.0015  | 0       | 0.58  | 2.909 | 0.157 | 1299  | 1 | 47 | 132 | 2 | 1 | 1 |                              |
| EFIA_HALMAReview | 1 | Elongation factor 1-alpha (EF-1-alpha) (Elongation factor Tu) (EF-Tu) | tu | rmAC2406 | 421 | 77.7 | 27 | 132 | 1      | R | VETGILNTGDNVSFQPSDVSGEVK | T | 2 | 2491.2078 | 2491.2095 | 0.0017  | 0       | 0.68  | 4.339 | 0.589 | 1367  | 1 | 26 | 46  | 2 |   |   |                              |



|              |   |                                                             |      |          |     |      |    |     |        |   |                                   |   |   |           |           |         |         |       |       |       |       |    |    |     |   |   |   |  |
|--------------|---|-------------------------------------------------------------|------|----------|-----|------|----|-----|--------|---|-----------------------------------|---|---|-----------|-----------|---------|---------|-------|-------|-------|-------|----|----|-----|---|---|---|--|
| QSV357_HALMA | 1 | 3-hydroxyacyl-CoA dehydrogenase (EC 1.1.1.35) (EC 4.2.1.17) | hbd1 | rmAC1083 | 669 | 66.7 | 29 | 125 | 1      | K | LVENDVPADVPADIDQAVQLGGGFPDGPAP    | I | 2 | 2791.4028 | 2791.4097 | 0.0069  | 0       | 2.47  | 5.585 | 0.614 | 2424  | 1  | 28 | 54  | 2 | 0 | 1 |  |
| QSV357_HALMA | 1 | 3-hydroxyacyl-CoA dehydrogenase (EC 1.1.1.35) (EC 4.2.1.17) | hbd1 | rmAC1083 | 669 | 66.7 | 29 | 125 | 0.9072 | K | LVENDVPADVPADIDQAVQLGGGFPDGPAP    | I | 3 | 2791.4028 | 2791.4024 | -0.0004 | 0       | -0.14 | 2.746 | 0.041 | 351   | 88 | 22 | 108 | 2 | 0 | 1 |  |
| QSV357_HALMA | 1 | 3-hydroxyacyl-CoA dehydrogenase (EC 1.1.1.35) (EC 4.2.1.17) | hbd1 | rmAC1083 | 669 | 66.7 | 29 | 125 | 1      | V | MDFEDIDTIAVLGAGNMGHGITEVAALAGYDVR | M | 3 | 3420.6330 | 3420.6509 | 0.0179  | 0       | 5.23  | 5.087 | 0.536 | 1718  | 1  | 40 | 128 | 1 | 0 | 1 |  |
| QSV357_HALMA | 1 | 3-hydroxyacyl-CoA dehydrogenase (EC 1.1.1.35) (EC 4.2.1.17) | hbd1 | rmAC1083 | 669 | 66.7 | 29 | 125 | 1      | V | MDFEDIDTIAVLGAGNMGHGITEVAALAGYDVR | M | 3 | 3420.6330 | 3420.6394 | 0.0064  | 0       | 1.87  | 5     | 0.499 | 1455  | 1  | 39 | 128 | 1 | 0 | 1 |  |
| QSV357_HALMA | 1 | 3-hydroxyacyl-CoA dehydrogenase (EC 1.1.1.35) (EC 4.2.1.17) | hbd1 | rmAC1083 | 669 | 66.7 | 29 | 125 | 1      | V | MDFEDIDTIAVLGAGNMGHGITEVAALAGYDVR | M | 3 | 3420.6330 | 3420.6529 | 0.0199  | 0       | 5.82  | 5.081 | 0.513 | 1840  | 1  | 45 | 128 | 1 | 0 | 1 |  |
| QSV357_HALMA | 1 | 3-hydroxyacyl-CoA dehydrogenase (EC 1.1.1.35) (EC 4.2.1.17) | hbd1 | rmAC1083 | 669 | 66.7 | 29 | 125 | 1      | V | MDFEDIDTIAVLGAGNMGHGITEVAALAGYDVR | M | 3 | 3420.6330 | 3420.6382 | 0.0052  | 0       | 1.52  | 4.722 | 0.495 | 1482  | 1  | 38 | 128 | 1 | 0 | 1 |  |
| QSV357_HALMA | 1 | 3-hydroxyacyl-CoA dehydrogenase (EC 1.1.1.35) (EC 4.2.1.17) | hbd1 | rmAC1083 | 669 | 66.7 | 29 | 125 | 0.9998 | V | MDFEDIDTIAVLGAGNMGHGITEVAALAGYDVR | M | 4 | 3420.6330 | 3420.6431 | 0.0101  | 0       | 2.95  | 3.939 | 0.372 | 765.7 | 1  | 47 | 192 | 1 | 0 | 1 |  |
| QSV357_HALMA | 1 | 3-hydroxyacyl-CoA dehydrogenase (EC 1.1.1.35) (EC 4.2.1.17) | hbd1 | rmAC1083 | 669 | 66.7 | 29 | 125 | 0.9997 | V | MDFEDIDTIAVLGAGNMGHGITEVAALAGYDVR | M | 3 | 3420.6330 | 3420.6436 | 0.0106  | 0       | 3.10  | 4.243 | 0.385 | 729.8 | 1  | 28 | 128 | 1 | 0 | 1 |  |
| QSV357_HALMA | 1 | 3-hydroxyacyl-CoA dehydrogenase (EC 1.1.1.35) (EC 4.2.1.17) | hbd1 | rmAC1083 | 669 | 66.7 | 29 | 125 | 0.9994 | V | MDFEDIDTIAVLGAGNMGHGITEVAALAGYDVR | M | 4 | 3420.6330 | 3420.6438 | 0.0108  | 0       | 3.16  | 3.263 | 0.325 | 532.6 | 1  | 41 | 192 | 1 | 0 | 1 |  |
| QSV357_HALMA | 1 | 3-hydroxyacyl-CoA dehydrogenase (EC 1.1.1.35) (EC 4.2.1.17) | hbd1 | rmAC1083 | 669 | 66.7 | 29 | 125 | 0.9991 | V | MDFEDIDTIAVLGAGNMGHGITEVAALAGYDVR | M | 3 | 3420.6330 | 3421.6582 | 1.0252  | -1.0034 | 6.39  | 4.539 | 0.389 | 1487  | 1  | 36 | 128 | 1 | 0 | 1 |  |
| QSV357_HALMA | 1 | 3-hydroxyacyl-CoA dehydrogenase (EC 1.1.1.35) (EC 4.2.1.17) | hbd1 | rmAC1083 | 669 | 66.7 | 29 | 125 | 0.9962 | V | MDFEDIDTIAVLGAGNMGHGITEVAALAGYDVR | M | 3 | 3420.6330 | 3422.6602 | 2.0272  | -2.0067 | 5.99  | 4.492 | 0.332 | 992   | 1  | 34 | 128 | 1 | 0 | 1 |  |
| QSV357_HALMA | 1 | 3-hydroxyacyl-CoA dehydrogenase (EC 1.1.1.35) (EC 4.2.1.17) | hbd1 | rmAC1083 | 669 | 66.7 | 29 | 125 | 0.9911 | V | MDFEDIDTIAVLGAGNMGHGITEVAALAGYDVR | M | 3 | 3420.6330 | 3422.6504 | 2.0174  | -2.0067 | 3.13  | 3.569 | 0.345 | 1104  | 1  | 32 | 128 | 1 | 0 | 1 |  |
| QSV357_HALMA | 1 | 3-hydroxyacyl-CoA dehydrogenase (EC 1.1.1.35) (EC 4.2.1.17) | hbd1 | rmAC1083 | 669 | 66.7 | 29 | 125 | 0.9872 | V | MDFEDIDTIAVLGAGNMGHGITEVAALAGYDVR | M | 3 | 3420.6330 | 3421.6282 | 0.9952  | -1.0034 | -3.28 | 3.256 | 0.343 | 604.4 | 1  | 27 | 128 | 1 | 0 | 1 |  |
| QSV357_HALMA | 1 | 3-hydroxyacyl-CoA dehydrogenase (EC 1.1.1.35) (EC 4.2.1.17) | hbd1 | rmAC1083 | 669 | 66.7 | 29 | 125 | 0.9837 | V | MDFEDIDTIAVLGAGNMGHGITEVAALAGYDVR | M | 3 | 3420.6330 | 3422.6441 | 2.0111  | -2.0067 | 1.29  | 3.493 | 0.323 | 768.8 | 1  | 28 | 128 | 1 | 0 | 1 |  |
| QSV357_HALMA | 1 | 3-hydroxyacyl-CoA dehydrogenase (EC 1.1.                    |      |          |     |      |    |     |        |   |                                   |   |   |           |           |         |         |       |       |       |       |    |    |     |   |   |   |  |























|              |   |                                          |           |           |     |      |    |    |        |   |                    |   |   |           |           |         |         |       |       |       |       |   |    |     |   |   |   |                              |
|--------------|---|------------------------------------------|-----------|-----------|-----|------|----|----|--------|---|--------------------|---|---|-----------|-----------|---------|---------|-------|-------|-------|-------|---|----|-----|---|---|---|------------------------------|
| QSV207_HALMA | 1 | Hypothetical protein                     | rrnAC1525 | rrnAC1525 | 380 | 72.1 | 28 | 99 | 1      | R | VLDMPVYDVMSPPVETAK | L | 2 | 1979.9584 | 1979.9661 | 0.0077  | 0       | 3.89  | 5.457 | 0.499 | 2618  | 1 | 28 | 34  | 2 | 0 | 1 |                              |
| QSV207_HALMA | 1 | Hypothetical protein                     | rrnAC1525 | rrnAC1525 | 380 | 72.1 | 28 | 99 | 1      | R | VLDMPVYDVMSPPVETAK | L | 2 | 1979.9584 | 1979.9646 | 0.0062  | 0       | 3.13  | 5.148 | 0.503 | 2436  | 1 | 27 | 34  | 2 | 0 | 1 |                              |
| QSV207_HALMA | 1 | Hypothetical protein                     | rrnAC1525 | rrnAC1525 | 380 | 72.1 | 28 | 99 | 1      | R | VLDMPVYDVMSPPVETAK | L | 2 | 1979.9584 | 1979.9636 | 0.0052  | 0       | 2.63  | 5.506 | 0.511 | 2407  | 1 | 27 | 34  | 2 | 0 | 1 |                              |
| QSV207_HALMA | 1 | Hypothetical protein                     | rrnAC1525 | rrnAC1525 | 380 | 72.1 | 28 | 99 | 1      | R | VLDMPVYDVMSPPVETAK | L | 2 | 2011.9572 | 2011.9542 | -0.0030 | 0       | -1.49 | 5.288 | 0.561 | 1922  | 1 | 24 | 34  | 2 | 0 | 1 | VLDM[147]PVYDVM[147]SSPVETAK |
| QSV207_HALMA | 1 | Hypothetical protein                     | rrnAC1525 | rrnAC1525 | 380 | 72.1 | 28 | 99 | 0.9999 | R | VLDMPVYDVMSPPVETAK | L | 2 | 1979.9584 | 1979.9667 | 0.0083  | 0       | 4.19  | 3.212 | 0.207 | 1249  | 1 | 20 | 34  | 2 | 0 | 1 |                              |
| QSV207_HALMA | 1 | Hypothetical protein                     | rrnAC1525 | rrnAC1525 | 380 | 72.1 | 28 | 99 | 0.9998 | R | VLDMPVYDVMSPPVETAK | L | 2 | 1995.9578 | 1995.9639 | 0.0061  | 0       | 3.06  | 5.112 | 0.564 | 2018  | 1 | 23 | 34  | 2 | 0 | 1 | VLDM[147]PVYDVMSPPVETAK      |
| QSV5U1_HALMA | 1 | Fumarate hydratase class-II (EC 4.2.1.2) | fumC      | rrnAC0028 | 468 | 74.4 | 28 | 98 | 1      | K | IANDLRLASGPR       | N | 3 | 1394.7994 | 1394.8014 | 0.0020  | 0       | 1.43  | 3.64  | 0.413 | 917.2 | 1 | 26 | 48  | 2 | 1 | 1 |                              |
| QSV5U1_HALMA | 1 | Fumarate hydratase class-II (EC 4.2.1.2) | fumC      | rrnAC0028 | 468 | 74.4 | 28 | 98 | 0.9871 | K | AAQAQRDLLETIPEDK   | A | 2 | 1740.8642 | 1740.8708 | 0.0066  | 0       | 3.79  | 2.216 | 0.176 | 326.4 | 2 | 14 | 30  | 2 | 1 | 1 |                              |
| QSV5U1_HALMA | 1 | Fumarate hydratase class-II (EC 4.2.1.2) | fumC      | rrnAC0028 | 468 | 74.4 | 28 | 98 | 1      | K | AATYISEETDLNFR     | E | 2 | 1628.7682 | 1628.7753 | 0.0071  | 0       | 4.36  | 3.594 | 0.501 | 1948  | 1 | 21 | 26  | 2 | 0 | 1 |                              |
| QSV5U1_HALMA | 1 | Fumarate hydratase class-II (EC 4.2.1.2) | fumC      | rrnAC0028 | 468 | 74.4 | 28 | 98 | 0.9999 | K | AATYISEETDLNFR     | E | 5 | 4087.8355 | 4089.8635 | 2.0280  | -2.0067 | 5.21  | 3.639 | 0.261 | 879.5 | 2 | 62 | 288 | 2 | 1 | 1 |                              |
| QSV5U1_HALMA | 1 | Fumarate hydratase class-II (EC 4.2.1.2) | fumC      | rrnAC0028 | 468 | 74.4 | 28 | 98 | 1      | R | ATELYGGDIGTR       | E | 2 | 1251.6095 | 1251.6054 | -0.0041 | 0       | -3.28 | 3.341 | 0.397 | 1369  | 1 | 18 | 22  | 2 | 0 | 1 |                              |
| QSV5U1_HALMA | 1 | Fumarate hydratase class-II (EC 4.2.1.2) | fumC      | rrnAC0028 | 468 | 74.4 | 28 | 98 | 1      | R | ATELYGGDIGTR       | E | 2 | 1251.6095 | 1251.6054 | -0.0041 | 0       | -3.28 | 3.135 | 0.375 | 1174  | 1 | 17 | 22  | 2 | 0 | 1 |                              |
| QSV5U1_HALMA | 1 | Fumarate hydratase class-II (EC 4.2.1.2) | fumC      | rrnAC0028 | 468 | 74.4 | 28 | 98 | 1      | R | ATELYGGDIGTR       | E | 2 | 1251.6095 | 1251.6054 | -0.0041 | 0       | -3.28 | 3.213 | 0.396 | 1098  | 1 | 17 | 22  | 2 | 0 | 1 |                              |
| QSV5U1_HALMA | 1 | Fumarate hydratase class-II (EC 4.2.1.2) | fumC      | rrnAC0028 | 468 | 74.4 | 28 | 98 | 1      | R | ATELYGGDIGTR       | E | 2 | 1251.6095 | 1251.6054 | -0.0041 | 0       | -3.28 | 3.119 | 0.381 | 1216  | 1 | 17 | 22  | 2 | 0 | 1 |                              |
| QSV5U1_HALMA | 1 | Fumarate hydratase class-II (EC 4.2.1.2) | fumC      | rrnAC0028 | 468 | 74.4 | 28 | 98 | 1      | R | AVENFPISDVTFGR     | R | 2 | 1550.7729 | 1550.7791 | 0.0062  | 0       | 4.00  | 3.86  | 0.413 | 754   | 1 | 19 | 26  | 2 | 0 | 1 |                              |
| QSV5U1_HALMA | 1 | Fumarate hydratase class-II (EC 4.2.1.2) | fumC      | rrnAC0028 | 468 | 74.4 | 28 | 98 | 1      | R | AVENFPISDVTFGR     | R | 2 | 1550.7729 | 1550.7774 | 0.0045  | 0       | 2.90  | 4.157 | 0.496 | 911.5 | 1 | 20 | 26  | 2 | 0 |   |                              |







































































|              |   |                                      |      |         |     |    |    |    |        |   |                                 |   |   |           |           |         |   |       |       |       |       |   |    |     |   |   |   |
|--------------|---|--------------------------------------|------|---------|-----|----|----|----|--------|---|---------------------------------|---|---|-----------|-----------|---------|---|-------|-------|-------|-------|---|----|-----|---|---|---|
| Q5UWB8_HALMA | 1 | AcyI-CoA dehydrogenase (EC 1.3.99.3) | acdH | rmB0264 | 388 | 49 | 13 | 40 | 1      | K | DGDEYVLNGNK                     | A | 2 | 1222.5466 | 1222.5453 | -0.0013 | 0 | -1.06 | 3.019 | 0.362 | 1150  | 1 | 15 | 20  | 2 | 0 | 1 |
| Q5UWB8_HALMA | 1 | AcyI-CoA dehydrogenase (EC 1.3.99.3) | acdH | rmB0264 | 388 | 49 | 13 | 40 | 1      | R | GTDGISLFVDMDDPNIDVSPPIK         | H | 2 | 2557.2621 | 2557.2722 | 0.0101  | 0 | 3.95  | 4.962 | 0.566 | 1885  | 1 | 25 | 46  | 2 | 0 | 1 |
| Q5UWB8_HALMA | 1 | AcyI-CoA dehydrogenase (EC 1.3.99.3) | acdH | rmB0264 | 388 | 49 | 13 | 40 | 1      | R | GTDGISLFVDMDDPNIDVSPPIK         | H | 2 | 2557.2621 | 2557.2698 | 0.0077  | 0 | 3.01  | 4.991 | 0.529 | 1902  | 1 | 26 | 46  | 2 | 0 | 1 |
| Q5UWB8_HALMA | 1 | AcyI-CoA dehydrogenase (EC 1.3.99.3) | acdH | rmB0264 | 388 | 49 | 13 | 40 | 1      | R | GTDGISLFVDMDDPNIDVSPPIK         | H | 2 | 2557.2621 | 2557.2761 | 0.0140  | 0 | 5.47  | 4.995 | 0.606 | 1857  | 1 | 25 | 46  | 2 | 0 | 1 |
| Q5UWB8_HALMA | 1 | AcyI-CoA dehydrogenase (EC 1.3.99.3) | acdH | rmB0264 | 388 | 49 | 13 | 40 | 1      | R | GTDGISLFVDMDDPNIDVSPPIK         | H | 2 | 2557.2621 | 2557.2737 | 0.0116  | 0 | 4.54  | 5.075 | 0.577 | 1949  | 1 | 26 | 46  | 2 | 0 | 1 |
| Q5UWB8_HALMA | 1 | AcyI-CoA dehydrogenase (EC 1.3.99.3) | acdH | rmB0264 | 388 | 49 | 13 | 40 | 1      | R | IGFAAAGTGIGK                    | L | 2 | 1061.5869 | 1061.5889 | 0.0020  | 0 | 1.88  | 2.879 | 0.319 | 1595  | 1 | 18 | 22  | 2 | 0 | 1 |
| Q5UWB8_HALMA | 1 | AcyI-CoA dehydrogenase (EC 1.3.99.3) | acdH | rmB0264 | 388 | 49 | 13 | 40 | 1      | R | IGFAAAGTGIGK                    | L | 2 | 1061.5869 | 1061.5885 | 0.0016  | 0 | 1.51  | 3.247 | 0.255 | 1690  | 1 | 18 | 22  | 2 | 0 | 1 |
| Q5UWB8_HALMA | 1 | AcyI-CoA dehydrogenase (EC 1.3.99.3) | acdH | rmB0264 | 388 | 49 | 13 | 40 | 1      | R | IGFAAAGTGIGK                    | L | 2 | 1061.5869 | 1061.5884 | 0.0015  | 0 | 1.41  | 2.703 | 0.293 | 1568  | 1 | 18 | 22  | 2 | 0 | 1 |
| Q5UWB8_HALMA | 1 | AcyI-CoA dehydrogenase (EC 1.3.99.3) | acdH | rmB0264 | 388 | 49 | 13 | 40 | 1      | R | IGFAAAGTGIGK                    | L | 2 | 1061.5869 | 1061.5874 | 0.0005  | 0 | 0.47  | 3.397 | 0.233 | 1617  | 1 | 18 | 22  | 2 | 0 | 1 |
| Q5UWB8_HALMA | 1 | AcyI-CoA dehydrogenase (EC 1.3.99.3) | acdH | rmB0264 | 388 | 49 | 13 | 40 | 1      | K | LAADTAIEYASDREVFDAPIGSHQAVSFPTK | A | 4 | 3418.7045 | 3418.7190 | 0.0145  | 0 | 4.24  | 4.854 | 0.507 | 1334  | 1 | 50 | 186 | 2 | 1 | 1 |
| Q5UWB8_HALMA | 1 | AcyI-CoA dehydrogenase (EC 1.3.99.3) | acdH | rmB0264 | 388 | 49 | 13 | 40 | 1      | K | LAADTAIEYASDREVFDAPIGSHQAVSFPTK | A | 4 | 3418.7045 | 3418.7146 | 0.0101  | 0 | 2.95  | 4.083 | 0.411 | 1495  | 1 | 49 | 186 | 2 | 1 | 1 |
| Q5UWB8_HALMA | 1 | AcyI-CoA dehydrogenase (EC 1.3.99.3) | acdH | rmB0264 | 388 | 49 | 13 | 40 | 1      | K | LAADTAIEYASDREVFDAPIGSHQAVSFPTK | A | 3 | 3418.7045 | 3418.7202 | 0.0157  | 0 | 4.59  | 6.635 | 0.521 | 2478  | 1 | 49 | 124 | 2 | 1 | 1 |
| Q5UWB8_HALMA | 1 | AcyI-CoA dehydrogenase (EC 1.3.99.3) | acdH | rmB0264 | 388 | 49 | 13 | 40 | 1      | K | LAADTAIEYASDREVFDAPIGSHQAVSFPTK | A | 3 | 3418.7045 | 3418.7146 | 0.0101  | 0 | 2.95  | 6.401 | 0.548 | 1768  | 1 | 44 | 124 | 2 | 1 | 1 |
| Q5UWB8_HALMA | 1 | AcyI-CoA dehydrogenase (EC 1.3.99.3) | acdH | rmB0264 | 388 | 49 | 13 | 40 | 1      | K | LAADTAIEYASDREVFDAPIGSHQAVSFPTK | A | 4 | 3418.7045 | 3418.7122 | 0.0077  | 0 | 2.25  | 5.212 | 0.539 | 1112  | 1 | 48 | 186 | 2 | 1 | 1 |
| Q5UWB8_HALMA | 1 | AcyI-CoA dehydrogenase (EC 1.3.99.3) | acdH | rmB0264 | 388 | 49 | 13 | 40 | 1      | K | LAADTAIEYASDREVFDAPIGSHQAVSFPTK | A | 4 | 3418.7045 | 3418.7132 | 0.0087  | 0 | 2.54  | 4.313 | 0.482 | 1045  | 1 | 49 | 186 | 2 | 1 | 1 |
| Q5UWB8_HALMA | 1 | AcyI-CoA dehydrogenase (EC 1.3.99.3) | acdH | rmB0264 | 388 | 49 | 13 | 40 | 0.9999 | R | LAPVSQQMAYNHIGQHLGFP            | S | 3 | 2363.1957 | 2363.1995 | 0.0038  | 0 | 1.61  | 2.154 | 0.336 | 823.2 | 1 | 37 | 80  | 2 | 0 | 1 |
| Q5UWB8_HALMA | 1 |                                      |      |         |     |    |    |    |        |   |                                 |   |   |           |           |         |   |       |       |       |       |   |    |     |   |   |   |





























|              |   |                                           |       |          |     |      |    |    |        |   |                                            |   |   |           |           |         |         |        |         |       |       |    |    |     |   |   |   |
|--------------|---|-------------------------------------------|-------|----------|-----|------|----|----|--------|---|--------------------------------------------|---|---|-----------|-----------|---------|---------|--------|---------|-------|-------|----|----|-----|---|---|---|
| Q5UY19_HALMA | 1 | Universal stress protein                  | usp35 | rmAC3125 | 132 | 54.5 | 6  | 28 | 0.9913 | R | VTLLHDFEENPEGASVDQVASVRR                   | A | 4 | 2667.3252 | 2667.3321 | 0.0069  | 0       | 2.59   | 2.984   | 0.152 | 817.4 | 23 | 37 | 138 | 2 | 0 | 1 |
| Q5UYK2_HALMA | 1 | DNA repair and recombination protein RadA | rada  | rmAC2910 | 351 | 49   | 11 | 28 | 1      | R | VGDLNNTAVVVTNQVASNPDSFFGDPTQPIGGNILGHTSTFR | M | 3 | 4356.1411 | 4358.1680 | 2.0269  | -2.0067 | 4.64   | 5.492   | 0.537 | 1841  | 1  | 45 | 164 | 2 | 0 | 1 |
| Q5UYK2_HALMA | 1 | DNA repair and recombination protein RadA | rada  | rmAC2910 | 351 | 49   | 11 | 28 | 1      | K | AQELIASSEQEEFFVR                           | L | 2 | 1847.8537 | 1847.8576 | 0.0039  | 0       | 2.11   | 4.183   | 0.553 | 1822  | 1  | 22 | 30  | 2 | 0 | 1 |
| Q5UYK2_HALMA | 1 | DNA repair and recombination protein RadA | rada  | rmAC2910 | 351 | 49   | 11 | 28 | 1      | R | EAADIGGETGSTVLER                           | R | 2 | 1750.8373 | 1750.8395 | 0.0022  | 0       | 1.26   | 3.685   | 0.493 | 2102  | 1  | 25 | 32  | 2 | 0 | 1 |
| Q5UYK2_HALMA | 1 | DNA repair and recombination protein RadA | rada  | rmAC2910 | 351 | 49   | 11 | 28 | 1      | K | GLADEVLADTMVLHGIVEEADADPTDEALLDDLVASVLEK   | I | 3 | 4320.1094 | 4320.1323 | 0.0229  | 0       | 5.30   | 5.396   | 0.474 | 925.8 | 1  | 36 | 160 | 2 | 0 | 1 |
| Q5UYK2_HALMA | 1 | DNA repair and recombination protein RadA | rada  | rmAC2910 | 351 | 49   | 11 | 28 | 1      | K | GLADEVLADTMVLHGIVEEADADPTDEALLDDLVASVLEK   | I | 3 | 4336.1088 | 4337.1026 | 0.9938  | -1.0034 | -2.20  | 6.191   | 0.515 | 1198  | 1  | 37 | 160 | 2 | 0 | 1 |
| Q5UYK2_HALMA | 1 | DNA repair and recombination protein RadA | rada  | rmAC2910 | 351 | 49   | 11 | 28 | 1      | K | GLADEVLADTMVLHGIVEEADADPTDEALLDDLVASVLEK   | I | 3 | 4320.1094 | 4321.0987 | 0.9893  | -1.0034 | -3.25  | 5.993   | 0.5   | 1059  | 1  | 35 | 160 | 2 | 0 | 1 |
| Q5UYK2_HALMA | 1 | DNA repair and recombination protein RadA | rada  | rmAC2910 | 351 | 49   | 11 | 28 | 1      | K | GLADEVLADTMVLHGIVEEADADPTDEALLDDLVASVLEK   | I | 3 | 4320.1094 | 4321.0957 | 0.9863  | -1.0034 | -3.95  | 6.65    | 0.59  | 2505  | 1  | 50 | 160 | 2 | 0 | 1 |
| Q5UYK2_HALMA | 1 | DNA repair and recombination protein RadA | rada  | rmAC2910 | 351 | 49   | 11 | 28 | 0.9997 | R | LLAVDSLTAHFR                               | A | 3 | 1341.7405 | 1341.7404 | -0.0001 | 0       | -0.07  | 2.333   | 0.299 | 262.8 | 15 | 19 | 44  | 2 | 0 | 1 |
| Q5UYK2_HALMA | 1 | DNA repair and recombination protein RadA | rada  | rmAC2910 | 351 | 49   | 11 | 28 | 0.9985 | R | LLAVDSLTAHFR                               | A | 3 | 1341.7405 | 1341.7399 | -0.0006 | 0       | -0.45  | 2.448   | 0.201 | 280   | 9  | 17 | 44  | 2 | 0 | 1 |
| Q5UYK2_HALMA | 1 | DNA repair and recombination protein RadA | rada  | rmAC2910 | 351 | 49   | 11 | 28 | 0.9936 | R | LLAVDSLTAHFR                               | A | 3 | 1341.7405 | 1341.7394 | -0.0011 | 0       | -0.82  | 2.393   | 0.119 | 332.5 | 3  | 21 | 44  | 2 | 0 | 1 |
| Q5UYK2_HALMA | 1 | DNA repair and recombination protein RadA | rada  | rmAC2910 | 351 | 49   | 11 | 28 | 1      | K | LNKHLHDLMR                                 | V | 3 | 1275.6870 | 1275.6891 | 0.0021  | 0       | 1.65   | 3.326   | 0.297 | 1083  | 2  | 20 | 36  | 2 | 1 | 1 |
| Q5UYK2_HALMA | 1 | DNA repair and recombination protein RadA | rada  | rmAC2910 | 351 | 49   | 11 | 28 | 0.9999 | K | LNKHLHDLMR                                 | V | 3 | 1275.6870 | 1275.6891 | 0.0021  | 0       | 1.65   | 3.263   | 0.234 | 851   | 1  | 19 | 36  | 2 | 1 | 1 |
| Q5UYK2_HALMA | 1 | DNA repair and recombination protein RadA | rada  | rmAC2910 | 351 | 49   | 11 | 28 | 0.9999 | K | LNKHLHDLMR                                 | V | 3 | 1275.6870 | 1275.6884 | 0.0014  | 0       | 1.10   | 3.127   | 0.202 | 796.3 | 1  | 19 | 36  | 2 | 1 | 1 |
| Q5UYK2_HALMA | 1 | DNA repair and recombination protein RadA | rada  | rmAC2910 | 351 | 49   | 11 | 28 | 0.9954 | K | LNKHLHDLMR                                 | V | 3 | 1275.6870 | 1277.6482 | 1.9612  | -2.0067 | -35.67 | 2.887   | 0.181 | 743.1 | 8  | 18 | 36  | 2 | 1 | 1 |
| Q5UYK2_HALMA | 1 | DNA repair and recombination protein RadA | rada  | rmAC2910 | 351 | 49   | 11 | 28 | 0.9418 | K | LNKHLHDLMR                                 | V | 3 | 1275.6870 | 1277.6792 | 1.9522  | -2.0067 | -42.72 | 2.369   | 0.097 | 706.1 | 3  | 20 | 36  | 2 | 1 | 1 |
| Q5UYK2_HALMA | 1 | DNA repair and recombination protein RadA | rada  | rmAC2910 | 351 | 49   | 11 | 28 | 1      | K | LVDAPNLPDGEGVMR                            | V | 2 | 1581.7821 | 1581.7859 | 0.0038  | 0       | 2.40   | 4.012</ |       |       |    |    |     |   |   |   |











|              |   |               |      |          |     |      |   |    |        |   |                                 |   |   |           |           |         |   |       |       |       |       |   |    |     |   |   |   |                                  |
|--------------|---|---------------|------|----------|-----|------|---|----|--------|---|---------------------------------|---|---|-----------|-----------|---------|---|-------|-------|-------|-------|---|----|-----|---|---|---|----------------------------------|
| Q5V3W6_HALMA | 1 | Endoglucanase | cdlM | rmAC0799 | 355 | 43.9 | 8 | 25 | 1      | R | GQHVTHITADGPVSGVVGQTAIHLR       | D | 4 | 2549.3462 | 2549.3548 | 0.0086  | 0 | 3.37  | 5.842 | 0.551 | 2541  | 1 | 52 | 144 | 2 | 0 | 1 |                                  |
| Q5V3W6_HALMA | 1 | Endoglucanase | cdlM | rmAC0799 | 355 | 43.9 | 8 | 25 | 1      | R | GQHVTHITADGPVSGVVGQTAIHLR       | D | 4 | 2549.3462 | 2549.3548 | 0.0086  | 0 | 3.37  | 4.649 | 0.472 | 1720  | 1 | 50 | 144 | 2 | 0 | 1 |                                  |
| Q5V3W6_HALMA | 1 | Endoglucanase | cdlM | rmAC0799 | 355 | 43.9 | 8 | 25 | 1      | R | GQHVTHITADGPVSGVVGQTAIHLR       | D | 3 | 2549.3462 | 2549.3562 | 0.0100  | 0 | 3.92  | 5.12  | 0.496 | 1335  | 1 | 42 | 96  | 2 | 0 | 1 |                                  |
| Q5V3W6_HALMA | 1 | Endoglucanase | cdlM | rmAC0799 | 355 | 43.9 | 8 | 25 | 1      | R | GQHVTHITADGPVSGVVGQTAIHLR       | D | 4 | 2549.3462 | 2549.3518 | 0.0056  | 0 | 2.20  | 5.489 | 0.556 | 1884  | 1 | 49 | 144 | 2 | 0 | 1 |                                  |
| Q5V3W6_HALMA | 1 | Endoglucanase | cdlM | rmAC0799 | 355 | 43.9 | 8 | 25 | 1      | R | GSANHPVAVDALR                   | E | 3 | 1305.6789 | 1305.6682 | -0.0107 | 0 | -8.19 | 3.439 | 0.367 | 1189  | 1 | 25 | 48  | 2 | 0 | 1 |                                  |
| Q5V3W6_HALMA | 1 | Endoglucanase | cdlM | rmAC0799 | 355 | 43.9 | 8 | 25 | 0.9339 | R | GSANHPVAVDALR                   | E | 3 | 1305.6789 | 1305.6981 | 0.0192  | 0 | 14.70 | 1.863 | 0.072 | 570.2 | 5 | 22 | 48  | 2 | 0 | 1 |                                  |
| Q5V3W6_HALMA | 1 | Endoglucanase | cdlM | rmAC0799 | 355 | 43.9 | 8 | 25 | 1      | R | GSANHPVAVDALRETSDAEDIDIQLQATGIR | T | 4 | 3261.6225 | 3261.6302 | 0.0077  | 0 | 2.36  | 4.061 | 0.338 | 1502  | 1 | 43 | 180 | 2 | 1 | 1 |                                  |
| Q5V3W6_HALMA | 1 | Endoglucanase | cdlM | rmAC0799 | 355 | 43.9 | 8 | 25 | 1      | R | GSANHPVAVDALRETSDAEDIDIQLQATGIR | T | 3 | 3261.6225 | 3261.6338 | 0.0113  | 0 | 3.46  | 6.308 | 0.59  | 1721  | 1 | 45 | 120 | 2 | 1 | 1 |                                  |
| Q5V3W6_HALMA | 1 | Endoglucanase | cdlM | rmAC0799 | 355 | 43.9 | 8 | 25 | 0.9996 | R | GSANHPVAVDALRETSDAEDIDIQLQATGIR | T | 4 | 3261.6225 | 3261.6319 | 0.0094  | 0 | 2.88  | 3.925 | 0.162 | 1275  | 1 | 42 | 180 | 2 | 1 | 1 |                                  |
| Q5V3W6_HALMA | 1 | Endoglucanase | cdlM | rmAC0799 | 355 | 43.9 | 8 | 25 | 1      | K | MVGFDLAPDVAlAADVTHATDAPGSPGK    | A | 3 | 2722.3272 | 2722.3528 | 0.0256  | 0 | 9.40  | 3.188 | 0.332 | 462.9 | 2 | 25 | 108 | 2 | 0 | 1 |                                  |
| Q5V3W6_HALMA | 1 | Endoglucanase | cdlM | rmAC0799 | 355 | 43.9 | 8 | 25 | 1      | K | MVGFDLAPDVAlAADVTHATDAPGSPGK    | A | 3 | 2722.3272 | 2722.3418 | 0.0146  | 0 | 5.36  | 4.229 | 0.278 | 506.4 | 1 | 29 | 108 | 2 | 0 | 1 |                                  |
| Q5V3W6_HALMA | 1 | Endoglucanase | cdlM | rmAC0799 | 355 | 43.9 | 8 | 25 | 1      | K | MVGFDLAPDVAlAADVTHATDAPGSPGK    | A | 3 | 2722.3272 | 2722.3599 | 0.0327  | 0 | 12.01 | 3.364 | 0.324 | 476.6 | 2 | 27 | 108 | 2 | 0 | 1 |                                  |
| Q5V3W6_HALMA | 1 | Endoglucanase | cdlM | rmAC0799 | 355 | 43.9 | 8 | 25 | 0.9999 | K | MVGFDLAPDVAlAADVTHATDAPGSPGK    | A | 3 | 2722.3272 | 2722.3404 | 0.0168  | 0 | 6.17  | 3.667 | 0.26  | 569.4 | 1 | 30 | 108 | 2 | 0 | 1 |                                  |
| Q5V3W6_HALMA | 1 | Endoglucanase | cdlM | rmAC0799 | 355 | 43.9 | 8 | 25 | 1      | R | REFLESLLTTPGSPGYEADSQR          | V | 4 | 2608.2881 | 2608.2957 | 0.0076  | 0 | 2.91  | 3.173 | 0.303 | 1436  | 1 | 41 | 132 | 2 | 1 | 1 |                                  |
| Q5V3W6_HALMA | 1 | Endoglucanase | cdlM | rmAC0799 | 355 | 43.9 | 8 | 25 | 1      | R | YMHTPVEVIDPDDLADLADLLAGFAVR     | A | 3 | 2971.4682 | 2971.4712 | 0.0030  | 0 | 1.01  | 3.893 | 0.384 | 1020  | 1 | 34 | 104 | 2 | 0 | 1 | YM[147]HTPVEVIDPDDLADLADLLAGFAVR |
| Q5V3W6_HALMA | 1 | Endoglucanase | cdlM | rmAC0799 | 355 | 43.9 | 8 | 25 | 1      | R | YMHTPVEVIDPDDLADLADLLAGFAVR     | A | 3 | 2971.4682 | 2971.4756 | 0.0074  | 0 | 2.49  | 3.358 | 0.447 | 771.9 | 1 | 28 | 104 | 2 | 0 | 1 | YM[147]HTPVEVIDPDDLADLADLLAGFAVR |
| Q5V3W6_HALMA | 1 | Endoglucanase | cdlM | rmAC0799 |     |      |   |    |        |   |                                 |   |   |           |           |         |   |       |       |       |       |   |    |     |   |   |   |                                  |



|              |   |                                                      |       |          |     |      |    |    |        |   |                     |   |   |           |           |         |   |       |       |       |       |    |    |     |   |   |   |  |  |
|--------------|---|------------------------------------------------------|-------|----------|-----|------|----|----|--------|---|---------------------|---|---|-----------|-----------|---------|---|-------|-------|-------|-------|----|----|-----|---|---|---|--|--|
| Q5V4R5_HALMA | 1 | Type II DNA topoisomerase VI subunit B (EC 5.99.1.3) | top6B | rmAC0457 | 796 | 21.9 | 13 | 24 | 1      | R | ENVLEALWTAAGVGR     | E | 2 | 1656.8471 | 1656.8552 | 0.0081  | 0 | 4.89  | 4.188 | 0.556 | 2661  | 1  | 23 | 28  | 2 | 0 | 1 |  |  |
| Q5V4R5_HALMA | 1 | Type II DNA topoisomerase VI subunit B (EC 5.99.1.3) | top6B | rmAC0457 | 796 | 21.9 | 13 | 24 | 0.9999 | R | ENVLEALWTAAGVGR     | E | 2 | 1656.8471 | 1656.8549 | 0.0078  | 0 | 4.71  | 3.301 | 0.17  | 2678  | 1  | 23 | 28  | 2 | 0 | 1 |  |  |
| Q5V4R5_HALMA | 1 | Type II DNA topoisomerase VI subunit B (EC 5.99.1.3) | top6B | rmAC0457 | 796 | 21.9 | 13 | 24 | 1      | R | FANRVPVYQR          | G | 3 | 1361.7568 | 1361.7595 | 0.0027  | 0 | 1.98  | 3.772 | 0.355 | 1435  | 1  | 24 | 40  | 2 | 0 | 1 |  |  |
| Q5V4R5_HALMA | 1 | Type II DNA topoisomerase VI subunit B (EC 5.99.1.3) | top6B | rmAC0457 | 796 | 21.9 | 13 | 24 | 0.9999 | K | LTEVTDNDELHDDSLAR   | I | 2 | 2054.9756 | 2054.9907 | 0.0151  | 0 | 7.35  | 3.344 | 0.184 | 537.4 | 2  | 16 | 34  | 2 | 0 | 1 |  |  |
| Q5V4R5_HALMA | 1 | Type II DNA topoisomerase VI subunit B (EC 5.99.1.3) | top6B | rmAC0457 | 796 | 21.9 | 13 | 24 | 1      | R | STLDRYIQDTAVVNPCHAR | V | 3 | 2055.0497 | 2055.0606 | 0.0109  | 0 | 5.30  | 4.986 | 0.367 | 1979  | 1  | 32 | 68  | 2 | 1 | 1 |  |  |
| Q5V4R5_HALMA | 1 | Type II DNA topoisomerase VI subunit B (EC 5.99.1.3) | top6B | rmAC0457 | 796 | 21.9 | 13 | 24 | 1      | R | STLDRYIQDTAVVNPCHAR | V | 3 | 2055.0497 | 2055.0535 | 0.0038  | 0 | 1.85  | 4.322 | 0.345 | 1717  | 1  | 31 | 68  | 2 | 1 | 1 |  |  |
| Q5V4R5_HALMA | 1 | Type II DNA topoisomerase VI subunit B (EC 5.99.1.3) | top6B | rmAC0457 | 796 | 21.9 | 13 | 24 | 1      | R | STLDRYIQDTAVVNPCHAR | V | 4 | 2055.0497 | 2055.0493 | -0.0004 | 0 | -0.19 | 4.301 | 0.254 | 1688  | 1  | 40 | 102 | 2 | 1 | 1 |  |  |
| Q5V4R5_HALMA | 1 | Type II DNA topoisomerase VI subunit B (EC 5.99.1.3) | top6B | rmAC0457 | 796 | 21.9 | 13 | 24 | 1      | R | STLDRYIQDTAVVNPCHAR | V | 3 | 2055.0497 | 2055.0535 | 0.0038  | 0 | 1.85  | 4.398 | 0.401 | 1435  | 1  | 33 | 68  | 2 | 1 | 1 |  |  |
| Q5V4R5_HALMA | 1 | Type II DNA topoisomerase VI subunit B (EC 5.99.1.3) | top6B | rmAC0457 | 796 | 21.9 | 13 | 24 | 1      | R | STLDRYIQDTAVVNPCHAR | V | 3 | 2055.0497 | 2055.0589 | 0.0092  | 0 | 4.48  | 4.576 | 0.301 | 1699  | 2  | 30 | 68  | 2 | 1 | 1 |  |  |
| Q5V4R5_HALMA | 1 | Type II DNA topoisomerase VI subunit B (EC 5.99.1.3) | top6B | rmAC0457 | 796 | 21.9 | 13 | 24 | 0.9999 | R | STLDRYIQDTAVVNPCHAR | V | 4 | 2055.0497 | 2055.0503 | 0.0006  | 0 | 0.29  | 3.361 | 0.324 | 1372  | 9  | 36 | 102 | 2 | 1 | 1 |  |  |
| Q5V4R5_HALMA | 1 | Type II DNA topoisomerase VI subunit B (EC 5.99.1.3) | top6B | rmAC0457 | 796 | 21.9 | 13 | 24 | 0.9993 | R | STLDRYIQDTAVVNPCHAR | V | 4 | 2055.0497 | 2055.0506 | 0.0009  | 0 | 0.44  | 3.848 | 0.254 | 1041  | 24 | 36 | 102 | 2 | 1 | 1 |  |  |
| Q5V4R5_HALMA | 1 | Type II DNA topoisomerase VI subunit B (EC 5.99.1.3) | top6B | rmAC0457 | 796 | 21.9 | 13 | 24 | 0.9998 | R | STLDRYIQDTAVVNPCHAR | V | 3 | 2055.0497 | 2055.0681 | 0.0184  | 0 | 8.95  | 3.229 | 0.216 | 484.9 | 51 | 22 | 68  | 2 | 1 | 1 |  |  |
| Q5V4R5_HALMA | 1 | Type II DNA topoisomerase VI subunit B (EC 5.99.1.3) | top6B | rmAC0457 | 796 | 21.9 | 13 | 24 | 0.9583 | K | TADSVIANFNDRHYGR    | G | 3 | 1834.8710 | 1834.8682 | -0.0028 | 0 | -1.53 | 1.909 | 0.091 | 691.4 | 1  | 25 | 60  | 2 | 1 | 1 |  |  |
| Q5V4R5_HALMA | 1 | Type II DNA topoisomerase VI subunit B (EC 5.99.1.3) | top6B | rmAC0457 | 796 | 21.9 | 13 | 24 | 0.9177 | K | TADSVIANFNDRHYGR    | G | 3 | 1834.8710 | 1834.8755 | 0.0045  | 0 | 2.45  | 1.84  | 0.072 | 542.1 | 2  | 24 | 60  | 2 | 1 | 1 |  |  |
| Q5V4R5_HALMA | 1 | Type II DNA topoisomerase VI subunit B (EC 5.99.1.3) | top6B | rmAC0457 | 796 | 21.9 | 13 | 24 | 0.9074 | K | TADSVIANFNDRHYGR    | G | 3 | 1834.8710 | 1834.8727 | 0.0017  | 0 | 0.93  | 1.992 | 0.065 | 471.4 | 6  | 22 | 60  | 2 | 1 | 1 |  |  |
| Q5V4R5_HALMA | 1 | Type II DNA topoisomerase VI subunit B (EC 5.99.1.3) | top6B | rmAC0457 | 796 | 21.9 | 13 |    |        |   |                     |   |   |           |           |         |   |       |       |       |       |    |    |     |   |   |   |  |  |









[illegible]



|              |   |                         |          |          |     |      |   |    |        |   |                                            |   |   |           |           |         |         |       |       |       |       |   |    |     |   |   |   |
|--------------|---|-------------------------|----------|----------|-----|------|---|----|--------|---|--------------------------------------------|---|---|-----------|-----------|---------|---------|-------|-------|-------|-------|---|----|-----|---|---|---|
| Q5U265_HALMA | 1 | Hypothetical protein    | rmAC265  | rmAC2659 | 202 | 73.3 | 9 | 20 | 1      | R | RDALLVEEVEPTPLVATYEENSPTAFDLAATDASDVAR     | E | 3 | 4078.9858 | 4080.0081 | 1.0223  | -1.0034 | 4.65  | 7.549 | 0.638 | 2172  | 1 | 51 | 148 | 2 | 0 | 1 |
| Q5U265_HALMA | 1 | Hypothetical protein    | rmAC2659 | rmAC2659 | 202 | 73.3 | 9 | 20 | 1      | R | RDALLVEEVEPTPLVATYEENSPTAFDLAATDASDVAR     | E | 3 | 4078.9858 | 4080.9981 | 2.0123  | -2.0067 | 1.37  | 7.109 | 0.593 | 2281  | 1 | 50 | 148 | 2 | 0 | 1 |
| Q5U265_HALMA | 1 | Hypothetical protein    | rmAC2659 | rmAC2659 | 202 | 73.3 | 9 | 20 | 1      | R | VAGHVGVDADPTTNADPGGAVIGTVR                 | R | 2 | 2492.2870 | 2493.3054 | 1.0184  | -1.0034 | 6.04  | 5.444 | 0.342 | 1331  | 1 | 27 | 52  | 2 | 0 | 1 |
| Q5U282_HALMA | 1 | Histidine triad protein | hit2     | rmAC2638 | 142 | 96.5 | 6 | 20 | 0.9770 | - | MSEDCICQIVAGDIGPR                          | - | 2 | 1952.8794 | 1953.8654 | 0.9860  | -1.0034 | -8.88 | 3.132 | 0.048 | 540.7 | 5 | 14 | 34  | 2 | 0 | 1 |
| Q5U282_HALMA | 1 | hit2                    | hit2     | rmAC2638 | 142 | 96.5 | 6 | 20 | 1      | R | FEDDGGRRPIHVLVNDRPDISDDELDDEINDIVAEQA      | - | 3 | 4034.8617 | 4034.8677 | 0.0060  | 0       | 1.49  | 4.638 | 0.458 | 912.3 | 1 | 35 | 140 | 2 | 0 | 1 |
| Q5U282_HALMA | 1 | Histidine triad protein | hit2     | rmAC2638 | 142 | 96.5 | 6 | 20 | 1      | R | FEDDGGRRPIHVLVNDRPDISDDELDDEINDIVAEQA      | - | 3 | 4034.8617 | 4036.8682 | 2.0065  | -2.0067 | -0.05 | 4.794 | 0.476 | 895.2 | 1 | 35 | 140 | 2 | 0 | 1 |
| Q5U282_HALMA | 1 | Histidine triad protein | hit2     | rmAC2638 | 142 | 96.5 | 6 | 20 | 1      | R | FEDDGGRRPIHVLVNDRPDISDDELDDEINDIVAEQA      | - | 3 | 4034.8617 | 4034.8821 | 0.0204  | 0       | 5.06  | 4.798 | 0.511 | 855.5 | 1 | 34 | 140 | 2 | 0 | 1 |
| Q5U282_HALMA | 1 | Histidine triad protein | hit2     | rmAC2638 | 142 | 96.5 | 6 | 20 | 1      | R | FEDDGGRRPIHVLVNDRPDISDDELDDEINDIVAEQA      | - | 3 | 4034.8617 | 4036.8682 | 2.0065  | -2.0067 | -0.05 | 4.568 | 0.483 | 634.8 | 2 | 29 | 140 | 2 | 0 | 1 |
| Q5U282_HALMA | 1 | Histidine triad protein | hit2     | rmAC2638 | 142 | 96.5 | 6 | 20 | 0.9999 | R | FEDDGGRRPIHVLVNDRPDISDDELDDEINDIVAEQA      | - | 4 | 4034.8617 | 4036.8909 | 2.0292  | -2.0067 | 5.58  | 4.031 | 0.304 | 922   | 1 | 50 | 210 | 2 | 0 | 1 |
| Q5U282_HALMA | 1 | Histidine triad protein | hit2     | rmAC2638 | 142 | 96.5 | 6 | 20 | 1      | R | LNDTPADVASAVMSTLHELVPAVESAVDAPASTVAFNNGEVA | F | 5 | 5735.8642 | 5735.8599 | -0.0043 | 0       | -0.75 | 4.38  | 0.294 | 1175  | 1 | 72 | 440 | 2 | 0 | 1 |
| Q5U282_HALMA | 1 | Histidine triad protein | hit2     | rmAC2638 | 142 | 96.5 | 6 | 20 | 1      | R | LNDTPADVASAVMSTLHELVPAVESAVDAPASTVAFNNGEVA | F | 5 | 5735.8642 | 5736.8892 | 1.0250  | -1.0034 | 3.77  | 4.436 | 0.295 | 959.3 | 1 | 65 | 440 | 2 | 0 | 1 |
| Q5U282_HALMA | 1 | Histidine triad protein | hit2     | rmAC2638 | 142 | 96.5 | 6 | 20 | 0.9999 | R | LNDTPADVASAVMSTLHELVPAVESAVDAPASTVAFNNGEVA | F | 5 | 5735.8642 | 5737.8975 | 2.0333  | -2.0067 | 4.64  | 4.358 | 0.216 | 843.2 | 1 | 67 | 440 | 2 | 0 | 1 |
| Q5U282_HALMA | 1 | Histidine triad protein | hit2     | rmAC2638 | 142 | 96.5 | 6 | 20 | 0.9999 | R | LNDTPADVASAVMSTLHELVPAVESAVDAPASTVAFNNGEVA | F | 5 | 5735.8642 | 5737.8853 | 2.0211  | -2.0067 | 2.51  | 3.973 | 0.226 | 776.8 | 1 | 63 | 440 | 2 | 0 | 1 |
| Q5U282_HALMA | 1 | Histidine triad protein | hit2     | rmAC2638 | 142 | 96.5 | 6 | 20 | 1      | R | TVYEDDTVLAFLDANPLSPGHTLVIPK                | A | 4 | 2924.5171 | 2924.5303 | 0.0132  | 0       | 4.51  | 4.212 | 0.283 | 1347  | 1 | 40 | 156 | 2 | 0 | 1 |
| Q5U282_HALMA | 1 | Histidine triad protein | hit2     | rmAC2638 | 142 | 96.5 | 6 | 20 | 1      | R | TVYEDDTVLAFLDANPLSPGHTLVIPK                | A | 2 | 2924.5171 | 2926.5454 | 2.0283  | -2.0067 | 7.39  | 3.453 | 0.462 | 715.3 | 1 | 20 | 52  | 2 | 0 | 1 |
| Q5U282_HALMA | 1 | Histidine triad protein | hit2     | rmAC2638 | 142 | 96.5 | 6 | 20 | 1      | R | TVYEDDTVLAFLDANPLSPGHTLVIPK                | A | 3 | 2924.5171 | 2924.5208 | 0.0037  | 0       | 1.27  | 3.219 | 0.528 | 569.1 | 1 | 34 | 104 | 2 | 0 | 1 |
| Q5U282_HALMA | 1 | Histidine triad protein | hit2</   |          |     |      |   |    |        |   |                                            |   |   |           |           |         |         |       |       |       |       |   |    |     |   |   |   |



[illegible]















|                   |   |                                                                                                                                                  |              |          |     |      |   |    |        |   |                                             |   |   |           |           |         |         |       |       |       |       |    |    |     |   |   |   |
|-------------------|---|--------------------------------------------------------------------------------------------------------------------------------------------------|--------------|----------|-----|------|---|----|--------|---|---------------------------------------------|---|---|-----------|-----------|---------|---------|-------|-------|-------|-------|----|----|-----|---|---|---|
| TPIS_HALMAReview  | 1 | Triosephosphate isomerase (EC 5.3.1.1) (TIM) (Triose-phosphateisomerase)                                                                         | <i>tpiA</i>  | rmAC0537 | 215 | 52.1 | 5 | 17 | 0.9303 | - | MFVLVNLK                                    | A | 2 | 962.5623  | 962.5655  | 0.0032  | 0       | 3.32  | 1.567 | 0.107 | 244.8 | 40 | 8  | 14  | 2 | 0 | 1 |
| TPIS_HALMAReview  | 1 | Triosephosphate isomerase (EC 5.3.1.1) (TIM) (Triose-phosphateisomerase)                                                                         | <i>tpiA</i>  | rmAC0537 | 215 | 52.1 | 5 | 17 | 0.9999 | D | PDGVAVEPELLIGTGPVSK                         | A | 2 | 1962.0309 | 1962.0369 | 0.0060  | 0       | 3.06  | 4.146 | 0.492 | 587.1 | 1  | 22 | 38  | 1 | 0 | 1 |
| TPIS_HALMAReview  | 1 | Triosephosphate isomerase (EC 5.3.1.1) (TIM) (Triose-phosphateisomerase)                                                                         | <i>tpiA</i>  | rmAC0537 | 215 | 52.1 | 5 | 17 | 0.9988 | R | VAVAPQAAQISAVAEITGVETVAQHVSAVEHGSHTGSTLAEAA | L | 5 | 5743.8215 | 5744.8452 | 1.0237  | -1.0034 | 3.54  | 2.296 | 0.173 | 514.7 | 1  | 63 | 456 | 2 | 0 | 1 |
| TPIS_HALMAReview  | 1 | Triosephosphate isomerase (EC 5.3.1.1) (TIM) (Triose-phosphateisomerase)                                                                         | <i>tpiA</i>  | rmAC0537 | 215 | 52.1 | 5 | 17 | 0.9902 | R | VAVAPQAAQISAVAEITGVETVAQHVSAVEHGSHTGSTLAEAA | L | 5 | 5743.8215 | 5745.8638 | 2.0423  | -2.0067 | 6.20  | 2.517 | 0.032 | 498.3 | 1  | 62 | 456 | 2 | 0 | 1 |
| FOLD1_HALMAReview | 1 | Bifunctional protein fold 1 [Includes: Methylenetetrahydrofolatedehydrogenase (EC 1.5.1.5); Methylenlctrahydrofolate cyclohydrolase(EC 3.5.4.9)] | <i>folD1</i> | rmAC0996 | 297 | 40.4 | 6 | 16 | 1      | M | TEIDGNNAVAQSIIRDLLVASIDR                    | L | 3 | 2470.2663 | 2470.2754 | 0.0091  | 0       | 3.68  | 4.675 | 0.515 | 2107  | 1  | 39 | 88  | 2 | 1 | 1 |
| FOLD1_HALMAReview | 1 | Bifunctional protein fold 1 [Includes: Methylenetetrahydrofolatedehydrogenase (EC 1.5.1.5); Methylenlctrahydrofolate cyclohydrolase(EC 3.5.4.9)] | <i>folD1</i> | rmAC0996 | 297 | 40.4 | 6 | 16 | 0.9872 | R | AIDPMKDVDFGHPENVGR                          | L | 3 | 1995.9472 | 1995.9491 | 0.0019  | 0       | 0.95  | 3.12  | 0.077 | 889.6 | 7  | 26 | 68  | 2 | 1 | 1 |
| FOLD1_HALMAReview | 1 | Bifunctional protein fold 1 [Includes: Methylenetetrahydrofolatedehydrogenase (EC 1.5.1.5); Methylenlctrahydrofolate cyclohydrolase(EC 3.5.4.9)] | <i>folD1</i> | rmAC0996 | 297 | 40.4 | 6 | 16 | 0.9996 | K | GYELVGDVEYESAK                              | E | 2 | 1557.7198 | 1557.7244 | 0.0046  | 0       | 2.95  | 2.382 | 0.284 | 227.6 | 9  | 12 | 26  | 2 | 0 | 1 |
| FOLD1_HALMAReview | 1 | Bifunctional protein fold 1 [Includes: Methylenetetrahydrofolatedehydrogenase (EC 1.5.1.5); Methylenlctrahydrofolate cyclohydrolase(EC 3.5.4.9)] | <i>folD1</i> | rmAC0996 | 297 | 40.4 | 6 | 16 | 0.9974 | R | LADAGHRPLATVLMSDEPASETYVSMK                 | Q | 4 | 2975.4368 | 2976.4510 | 1.0142  | -1.0034 | 3.65  | 3.239 | 0.151 | 838.3 | 1  | 40 | 162 | 2 | 0 | 1 |
| FOLD1_HALMAReview | 1 | Bifunctional protein fold 1 [Includes: Methylenetetrahydrofolatedehydrogenase (EC 1.5.1.5); Methylenlctrahydrofolate cyclohydrolase(EC 3.5.4.9)] | <i>folD1</i> | rmAC0996 | 297 | 40.4 | 6 | 16 | 1      | K | LIESAGVDTEGDKDAVVVGR                        | S | 3 | 1914.0058 | 1914.0097 | 0.0039  | 0       | 2.04  | 3.444 | 0.376 | 1180  | 1  | 35 | 72  | 2 | 1 | 1 |
| FOLD1_HALMAReview | 1 | Bifunctional protein fold 1 [Includes: Methylenetetrahydrofolatedehydrogenase (EC 1.5.1.5); Methylenlctrahydrofolate cyclohydrolase(EC 3.5.4.9)] | <i>folD1</i> | rmAC0996 | 297 | 40.4 | 6 | 16 | 1      | K | LIESAGVDTEGDKDAVVVGR                        | S | 3 | 1914.0058 | 1914.0092 | 0.0034  | 0       | 1.78  | 3.561 | 0.415 | 1736  | 1  | 40 | 72  | 2 | 1 | 1 |
| FOLD1_HALMAReview | 1 | Bifunctional protein fold 1 [Includes: Methylenetetrahydrofolatedehydrogenase (EC 1.5.1.5); Methylenlctrahydrofolate cyclohydrolase(EC 3.5.4.9)] | <i>folD1</i> | rmAC0996 | 297 | 40.4 | 6 | 16 | 1      | K | LIESAGVDTEGDKDAVVVGR                        | S | 2 | 1914.0058 | 1914.0080 | 0.0022  | 0       | 1.15  | 3.757 | 0.456 | 1097  | 1  | 19 | 36  | 2 | 1 | 1 |
| FOLD1_HALMAReview | 1 | Bifunctional protein fold 1 [Includes: Methylenetetrahydrofolatedehydrogenase (EC 1.5.1.5); Methylenlctrahydrofolate cyclohydrolase(EC 3.5.4.9)] | <i>folD1</i> | rmAC0996 | 297 | 40.4 | 6 | 16 | 1      | K | LIESAGVDTEGDKDAVVVGR                        | S | 3 | 1914.0058 | 1914.0082 | 0.0024  | 0       | 1.25  | 3.434 | 0.5   | 1198  | 1  | 35 | 72  | 2 | 1 | 1 |
| FOLD1_HALMAReview | 1 | Bifunctional protein fold 1 [Includes: Methylenetetrahydrofolatedehydrogenase (EC 1.5.1.5); Methylenlctrahydrofolate cyclohydrolase(EC 3.5.4.9)] | <i>folD1</i> | rmAC0996 | 297 | 40.4 | 6 | 16 | 0.9999 | K | LIESAGVDTEGDKDAVVVGR                        | S | 3 | 1914.0058 | 1914.0064 | 0.0006  | 0       | 0.31  | 2.929 | 0.274 | 965.2 | 1  | 31 | 72  | 2 | 1 | 1 |
| FOLD1_HALMAReview | 1 | Bifunctional protein fold 1 [Includes: Methylenetetrahydrofolatedehydrogenase (EC 1.5.1.5); Methylenlctrahydrofolate cyclohydrolase(EC 3.5.4.9)] | <i>folD1</i> | rmAC0996 | 297 | 40.4 | 6 | 16 | 1      | R | NADILVAAAGVPPEMIDGK                         | M | 2 | 1782.9186 | 1782.9160 | -0.0026 | 0       | -1.46 | 4.512 | 0.511 | 1088  | 1  | 21 | 34  | 2 | 0 | 1 |
| FOLD1_HALMAReview | 1 |                                                                                                                                                  |              |          |     |      |   |    |        |   |                                             |   |   |           |           |         |         |       |       |       |       |    |    |     |   |   |   |













































|              |   |                                                            |                  |          |      |      |   |   |        |   |                                            |                         |   |           |           |           |         |         |       |       |       |      |    |     |    |   |   |   |
|--------------|---|------------------------------------------------------------|------------------|----------|------|------|---|---|--------|---|--------------------------------------------|-------------------------|---|-----------|-----------|-----------|---------|---------|-------|-------|-------|------|----|-----|----|---|---|---|
| Q5V0E7_HALMA | 1 | Methylglyoxal synthase (EC 4.2.3.3)                        | <i>mgsA</i>      | mmAC2162 | 127  | 30.7 | 3 | 6 | 1      | R | MDGIVFLRDLPTAQHPEDISALLR                   | I                       | 3 | 2803.4691 | 2804.3279 | 0.8588    | -1.0034 | -51.56  | 4.853 | 0.403 | 1390  | 1    | 35 | 96  | 2  | 1 | 1 |   |
| Q5V0E7_HALMA | 1 | Methylglyoxal synthase (EC 4.2.3.3)                        | <i>mgsA</i>      | mmAC2162 | 127  | 30.7 | 3 | 6 | 1      | R | MDGIVFLRDLPTAQHPEDISALLR                   | I                       | 3 | 2803.4691 | 2804.3257 | 0.8566    | -1.0034 | -52.35  | 4.703 | 0.394 | 1597  | 1    | 37 | 96  | 2  | 1 | 1 |   |
| Q5V0E7_HALMA | 1 | Methylglyoxal synthase (EC 4.2.3.3)                        | <i>mgsA</i>      | mmAC2162 | 127  | 30.7 | 3 | 6 | 0.9965 | R | MDGIVFLRDLPTAQHPEDISALLR                   | I                       | 3 | 2803.4691 | 2804.3233 | 0.8542    | -1.0034 | -53.20  | 3.716 | 0.156 | 983.4 | 1    | 30 | 96  | 2  | 1 | 1 |   |
| Q5V0T7_HALMA | 1 | Cell division protein FtsZ                                 | <i>ftsZ3</i>     | mmAC2004 | 412  | 16.3 | 3 | 6 | 1      | K | SLTNGLGAGGDPSMGER                          | A                       | 2 | 1617.7417 | 1617.7422 | 0.0005    | 0       | 0.31    | 4.076 | 0.526 | 1883  | 1    | 25 | 32  | 2  | 0 | 1 |   |
| Q5V0T7_HALMA | 1 | Cell division protein FtsZ                                 | <i>ftsZ3</i>     | mmAC2004 | 412  | 16.3 | 3 | 6 | 1      | K | AFSVMDDQIAETVK                             | G                       | 2 | 1550.8014 | 1550.8053 | 0.0039    | 0       | 2.51    | 2.797 | 0.373 | 1370  | 1    | 18 | 26  | 2  | 0 | 1 |   |
| Q5V0T7_HALMA | 1 | Cell division protein FtsZ                                 | <i>ftsZ3</i>     | mmAC2004 | 412  | 16.3 | 3 | 6 | 0.9997 | K | AFSVMDDQIAETVK                             | G                       | 2 | 1550.8014 | 1550.8123 | 0.0109    | 0       | 7.03    | 2.29  | 0.252 | 349.8 | 1    | 15 | 26  | 2  | 0 | 1 |   |
| Q5V0T7_HALMA | 1 | Cell division protein FtsZ                                 | <i>ftsZ3</i>     | mmAC2004 | 412  | 16.3 | 3 | 6 | 0.9999 | R | EAIQEVGDGDTSDASDNVESFDSAPNPGSQSSGGR        | T                       | 3 | 3658.5415 | 3659.5493 | 1.0078    | -1.0034 | 1.22    | 3.847 | 0.307 | 595.5 | 5    | 28 | 140 | 2  | 0 | 1 |   |
| Q5V0T7_HALMA | 1 | Cell division protein FtsZ                                 | <i>ftsZ3</i>     | mmAC2004 | 412  | 16.3 | 3 | 6 | 1      | K | SLTNGLGAGGDPSMGER                          | A                       | 2 | 1633.7411 | 1633.7422 | 0.0011    | 0       | 0.67    | 3.915 | 0.469 | 711.5 | 1    | 17 | 32  | 2  | 0 | 1 |   |
| Q5V0T7_HALMA | 1 | Cell division protein FtsZ                                 | <i>ftsZ3</i>     | mmAC2004 | 412  | 16.3 | 3 | 6 | 0.9984 | K | SLTNGLGAGGDPSMGER                          | A                       | 2 | 1617.7417 | 1618.7300 | 0.9883    | -1.0034 | -9.30   | 2.682 | 0.233 | 853.8 | 1    | 18 | 32  | 2  | 0 | 1 |   |
| Q5V0X4_HALMA | 1 | Glucosylase                                                | <i>cga-1</i>     | mmAC1961 | 1513 | 8.9  | 6 | 6 | 1      | R | ASDLYELLEEDGPLTTDAGYLAEQAFDDGALDSATPLGWSHA | L                       | 3 | 4693.1984 | 4694.2295 | 1.0311    | -1.0034 | 5.91    | 5.861 | 0.508 | 1400  | 1    | 41 | 172 | 2  | 0 | 1 |   |
| Q5V0X4_HALMA | 1 | Glucosylase                                                | <i>cga-1</i>     | mmAC1961 | 1513 | 8.9  | 6 | 6 | 0.9967 | R | LGELNALPTTSAGTEGPEPSERTPTWTGKEK            | Y                       | 3 | 2899.4199 | 2899.4248 | 0.0049    | 0       | 1.69    | 2.863 | 0.143 | 305.5 | 2    | 29 | 108 | 2  | 0 | 1 |   |
| Q5V0X4_HALMA | 1 | Glucosylase                                                | <i>cga-1</i>     | mmAC1961 | 1513 | 8.9  | 6 | 6 | 0.9059 | C | MRLSTALNEYKR                               | T                       | 3 | 1480.7820 | 1479.7350 | -1.0470   | 1       | -45.25  | 3.21  | 0.306 | 1116  | 1    | 22 | 44  | 1  | 1 | 1 |   |
| Q5V0X4_HALMA | 1 | Glucosylase                                                | <i>cga-1</i>     | mmAC1961 | 1513 | 8.9  | 6 | 6 | 1      | R | NIIDGGFLELVR                               | L                       | 2 | 1344.7401 | 1344.7453 | 0.0052    | 0       | 3.87    | 3.601 | 0.376 | 1540  | 1    | 18 | 22  | 2  | 0 | 1 |   |
| Q5V0X4_HALMA | 1 | Glucosylase                                                | <i>cga-1</i>     | mmAC1961 | 1513 | 8.9  | 6 | 6 | 0.9989 | R | TLDFLVR                                    | C                       | 2 | 862.4912  | 862.4854  | -0.0058   | 0       | -6.72   | 2.009 | 0.211 | 479   | 8    | 11 | 12  | 2  | 0 | 1 |   |
| Q5V114_HALMA | 1 | 6-O-methylguanine DNA methyltransferase DNA binding domain | <i>rrnAC1916</i> | mmAC1916 | 167  | 32.9 | 3 | 6 | 1      | R | IVLEAVQEIPYGEDASVAQVAR                     | M                       | 2 | 2356.2274 | 2356.2307 | 0.0033    | 0       | 1.40    | 5.192 | 0.569 | 1402  | 1    | 30 | 42  | 2  | 0 | 1 |   |
| Q5V114_HALMA | 1 | 6-O-methylguanine DNA methyltransferase DNA binding domain | <i>rrnAC1916</i> | mmAC1916 | 167  | 32.9 | 3 | 6 | 0.9812 | R | EALAAANPVLLIPDHR                           | V                       | 3 | 1724.9573 | 1724.9596 | 0.0023    | 0       | 1.33    | 1.917 | 0.129 | 606   | 2    | 24 | 60  | 2  | 0 | 1 |   |
| Q5V114_HALMA | 1 | 6-O-methylguanine DNA methyltransferase DNA binding domain | <i>rrnAC1916</i> | mmAC1916 | 167  | 32.9 | 3 | 6 | 1      | R | IVLEAVQEIPYGEDASVAQVAR                     | M                       | 2 | 2356.2274 | 2356.2310 | 0.0036    | 0       | 1.53    | 5.135 | 0.569 | 1429  | 1    | 30 | 42  | 2  | 0 | 1 |   |
| Q5V114_HALMA | 1 | 6-O-methylguanine DNA methyltransferase DNA binding domain | <i>rrnAC1916</i> | mmAC1916 | 167  | 32.9 | 3 | 6 | 1      | R | IVLEAVQEIPYGEDASVAQVAR                     | M                       | 2 | 2356.2274 | 2356.2334 | 0.0060    | 0       | 2.55    | 5.157 | 0.567 | 1327  | 1    | 29 | 42  | 2  | 0 | 1 |   |
| Q5V114_HALMA | 1 | 6-O-methylguanine DNA methyltransferase DNA binding domain | <i>rrnAC1916</i> | mmAC1916 | 167  | 32.9 | 3 | 6 | 1      | R | IVLEAVQEIPYGEDASVAQVAR                     | M                       | 2 | 2356.2274 | 2356.2373 | 0.0099    | 0       | 4.20    | 5.088 | 0.57  | 1304  | 1    | 29 | 42  | 2  | 0 | 1 |   |
| Q5V114_HALMA | 1 | 6-O-methylguanine DNA methyltransferase DNA binding domain | <i>rrnAC1916</i> | mmAC1916 | 167  | 32.9 | 3 | 6 | 1      | R | MTPDLNDDDEDLAQVR                           | E                       | 2 | 1974.8476 | 1975.8654 | 1.0178    | -1.0034 | 7.32    | 3.576 | 0.424 | 751.4 | 1    | 22 | 32  | 2  | 0 | 1 |   |
| Q5V287_HALMA | 1 | Glycerol-3-phosphate cytidyltransferase                    | <i>taqD</i>      | mmAC1438 | 116  | 44.8 | 2 | 6 | 1      | R | EMVGALKPVDEAHLGHSEDFPIPIER                 | I                       | 4 | 2901.4694 | 2901.4737 | 0.0043    | 0       | 1.48    | 3.913 | 0.294 | 967   | 2    | 40 | 150 | 2  | 0 | 1 |   |
| Q5V287_HALMA | 1 | Glycerol-3-phosphate cytidyltransferase                    | <i>taqD</i>      | mmAC1438 | 116  | 44.8 | 2 | 6 | 1      | R | EMVGALKPVDEAHLGHSEDFPIPIER                 | I                       | 3 | 2901.4694 | 2901.4749 | 0.0055    | 0       | 1.90    | 5.255 | 0.443 | 2243  | 1    | 38 | 100 | 2  | 0 | 1 |   |
| Q5V287_HALMA | 1 | Glycerol-3-phosphate cytidyltransferase                    | <i>taqD</i>      | mmAC1438 | 116  | 44.8 | 2 | 6 | 0.9996 | R | EMVGALKPVDEAHLGHSEDFPIPIER                 | I                       | 4 | 2901.4694 | 2901.4749 | 0.0055    | 0       | 1.90    | 3.963 | 0.184 | 1425  | 2    | 47 | 150 | 2  | 0 | 1 |   |
| Q5V287_HALMA | 1 | Glycerol-3-phosphate cytidyltransferase                    | <i>taqD</i>      | mmAC1438 | 116  | 44.8 | 2 | 6 | 0.9986 | R | EMVGALKPVDEAHLGHSEDFPIPIER                 | I                       | 4 | 2901.4694 | 2901.4800 | 0.0106    | 0       | 3.65    | 3.558 | 0.134 | 1096  | 2    | 44 | 150 | 2  | 0 | 1 |   |
| Q5V287_HALMA | 1 | Glycerol-3-phosphate cytidyltransferase                    | <i>taqD</i>      | mmAC1438 | 116  | 44.8 | 2 | 6 | 0.9945 | R | EMVGALKPVDEAHLGHSEDFPIPIER                 | I                       | 4 | 2901.4694 | 2901.4715 | 0.0021    | 0       | 0.72    | 3.647 | 0.115 | 900.1 | 6    | 39 | 150 | 2  | 0 | 1 |   |
| Q5V287_HALMA | 1 | Glycerol-3-phosphate cytidyltransferase                    | <i>taqD</i>      | mmAC1438 | 116  | 44.8 | 2 | 6 | 0.9987 | R | IEPDIALGYDQHHDDEQLEAALSAR                  | G                       | 4 | 2918.4046 | 2918.4077 | 0.0031    | 0       | 1.06    | 3.532 | 0.137 | 484.4 | 2    | 37 | 150 | 2  | 0 | 1 |   |
| Q5V2B7_HALMA | 1 | Diphthine synthase (EC 2.1.1.98)                           | <i>dph5</i>      | mmAC1406 | 259  | 27.8 | 2 | 6 | 0.9996 | R | AGSPDPLVAADTLDELATQTQFGDPLHLLVPGSLHPLEADTL | -                       | 3 | 5146.6238 | 5147.6299 | 1.0061    | -1.0034 | 0.53    | 3.438 | 0.276 | 319.8 | 3    | 25 | 200 | 2  | 0 | 1 |   |
| Q5V2B7_HALMA | 1 | Diphthine synthase (EC 2.1.1.98)                           | <i>dph5</i>      | mmAC1406 | 259  | 27.8 | 2 | 6 | 1      | R | AGSPDPLVAADTLDELATQTQFGDPLHLLVPGSLHPLEADTL | -                       | 3 | 5146.6238 | 5148.6382 | 2.0144    | -2.0067 | 1.50    | 4.996 | 0.445 | 688.6 | 1    | 35 | 200 | 2  | 0 | 1 |   |
| Q5V2B7_HALMA | 1 | Diphthine synthase (EC 2.1.1.98)                           | <i>dph5</i>      | mmAC1406 | 259  | 27.8 | 2 | 6 | 1      | R | AGSPDPLVAADTLDELATQTQFGDPLHLLVPGSLHPLEADTL | -                       | 3 | 5146.6238 | 5147.6470 | 1.0232    | -1.0034 | 3.86    | 4.252 | 0.391 | 287.5 | 2    | 25 | 200 | 2  | 0 | 1 |   |
| Q5V2B7_HALMA | 1 | Diphthine synthase (EC 2.1.1.98)                           | <i>dph5</i>      | mmAC1406 | 259  | 27.8 | 2 | 6 | 1      | R | IVHGTTAQTAAGSLTGLQNYR                      | F                       | 2 | 2158.1130 | 2158.1253 | 0.0123    | 0       | 5.70    | 5.163 | 0.594 | 2698  | 1    | 28 | 40  | 2  | 0 | 1 |   |
| Q5V2B7_HALMA | 1 | Diphthine synthase (EC 2.1.1.98)                           | <i>dph5</i>      | mmAC1406 | 259  | 27.8 | 2 | 6 | 1      | R | IVHGTTAQTAAGSLTGLQNYR                      | F                       | 3 | 2158.1130 | 2158.1140 | 0.0010    | 0       | 0.46    | 3.341 | 0.337 | 950.6 | 1    | 28 | 80  | 2  | 0 | 1 |   |
| Q5V2B7_HALMA | 1 | Diphthine synthase (EC 2.1.1.98)                           | <i>dph5</i>      | mmAC1406 | 259  | 27.8 | 2 | 6 | 1      | R | IVHGTTAQTAAGSLTGLQNYR                      | F                       | 3 | 2158.1130 | 2158.1128 | -0.0002   | 0       | -0.09   | 3.67  | 0.323 | 1130  | 1    | 29 | 80  | 2  | 0 | 1 |   |
| Q5V2L2_HALMA | 1 | Hypothetical protein                                       | <i>rrnAC1304</i> | mmAC1304 | 136  | 47.1 | 3 | 6 | 0.9996 | M | PVTSDDLEIRELHEDR                           | V                       | 4 | 1922.9334 | 1922.9352 | 0.0018    | 0       | 0.94    | 2.71  | 0.343 | 807.9 | 1    | 33 | 90  | 2  | 1 | 1 |   |
| Q5V2L2_HALMA | 1 | Hypothetical protein                                       | <i>rrnAC1304</i> | mmAC1304 | 136  | 47.1 | 3 | 6 | 0.9913 | K | AYDSLAEPGGEIDVDVFRPDSDEV                   | D                       | 3 | 2790.3712 | 2790.3687 | -0.0025   | 0       | -0.90   | 2.602 | 0.171 | 206.2 | 37   | 20 | 96  | 2  | 0 | 1 |   |
| Q5V2L2_HALMA | 1 | Hypothetical protein                                       | <i>rrnAC1304</i> | mmAC1304 | 136  | 47.1 | 3 | 6 | 0.9994 | M | PVTSDDLEIRELHEDR                           | V                       | 4 | 1922.9334 | 1922.9378 | 0.0044    | 0       | 2.29    | 2.799 | 0.323 | 849   | 1    | 35 | 90  | 2  | 1 | 1 |   |
| Q5V2L2_HALMA | 1 | Hypothetical protein                                       | <i>rrnAC1304</i> | mmAC1304 | 136  | 47.1 | 3 | 6 | 1      | K | YLSEQQGEVIVPNPFADEIFGQK                    | A                       | 2 | 2642.2904 | 2642.3120 | 0.0216    | 0       | 8.17    | 3.486 | 0.34  | 348.7 | 1    | 17 | 44  | 2  | 0 | 1 |   |
| Q5V2L2_HALMA | 1 | Hypothetical protein                                       | <i>rrnAC1304</i> | mmAC1304 | 136  | 47.1 | 3 | 6 | 1      | K | YLSEQQGEVIVPNPFADEIFGQK                    | A                       | 2 | 2642.2904 | 2642.3052 | 0.0148    | 0       | 5.60    | 4.157 | 0.551 | 579.7 | 1    | 22 | 44  | 2  | 0 | 1 |   |
| Q5V2L2_HALMA | 1 | Hypothetical protein                                       | <i>rrnAC1304</i> | mmAC1304 | 136  | 47.1 | 3 | 6 | 1      | K | YLSEQQGEVIVPNPFADEIFGQK                    | A                       | 2 | 2642.2904 | 2642.3001 | 0.0097    | 0       | 3.67    | 4.571 | 0.56  | 727.6 | 1    | 25 | 44  | 2  | 0 | 1 |   |
| Q5V306_HALMA | 1 | DNA mismatch repair protein                                | <i>mutS3</i>     | mmAC1144 | 585  | 13.7 | 3 | 6 | 0.9610 | K | AALDIAFVSLAR                               | F                       | 2 | 1362.7143 | 1362.6454 | -0.0689   | 0       | -50.56  | 1.712 | 0.119 | 320.8 | 15   | 14 | 24  | 2  | 0 | 1 |   |
| Q5V306_HALMA | 1 | DNA mismatch repair protein                                | <i>mutS3</i>     | mmAC1144 | 585  | 13.7 | 3 | 6 | 0.9996 | R | AALAGLAGDGEFVGEAGDEELDRLRDQLGQIEDLAAASMEVV | R                       | 4 | 5140.4895 | 5141.4981 | 1.0086    | -1.0034 | 1.02    | 3.928 | 0.238 | 894.6 | 1    | 42 | 294 | 2  | 2 | 1 |   |
| Q5V306_HALMA | 1 | DNA mismatch repair protein                                | <i>mutS3</i>     | mmAC1144 | 585  | 13.7 | 3 | 6 | 0.9966 | R | AALAGLAGDGEFVGEAGDEELDRLRDQLGQIEDLAAASMEVV | R                       | 4 | 5140.4895 | 5141.4898 | 1.0003    | -1.0034 | -0.59   | 3.862 | 0.14  | 1554  | 1    | 53 | 294 | 2  | 2 | 1 |   |
| Q5V306_HALMA | 1 | DNA mismatch repair protein                                | <i>mutS3</i>     | mmAC1144 | 585  | 13.7 | 3 | 6 | 0.9940 | R | AALAGLAGDGEFVGEAGDEELDRLRDQLGQIEDLAAASMEVV | R                       | 4 | 5140.4895 | 5141.4746 | 0.9851    | -1.0034 | -3.55   | 4.036 | 0.114 | 985.1 | 1    | 46 | 294 | 2  | 2 | 1 |   |
| Q5V306_HALMA | 1 | DNA mismatch repair protein                                | <i>mutS3</i>     | mmAC1144 | 585  | 13.7 | 3 | 6 | 1      | R | SGFETLATAVGEEAVQR                          | T                       | 3 | 1763.8690 | 1763.8725 | 0.0035    | 0       | 1.98    | 3.776 | 0.334 | 875.1 | 1    | 27 | 64  | 2  | 0 | 1 |   |
| Q5V342_HALMA | 1 | Hypothetical protein                                       | <i>rrnAC1101</i> | mmAC1101 | 346  | 28.6 | 5 | 6 | 0.9981 | K | TGAPTVSVGARPGKDIAEQDPVSTAHGAFAAAR          | Q                       | 4 | 3204.6276 | 3206.6509 | 2.0233    | -2.0067 | 5.18    | 3.006 | 0.223 | 548.2 | 4    | 39 | 192 | 2  | 1 | 1 |   |
| Q5V342_HALMA | 1 | Hypothetical protein                                       | <i>rrnAC1101</i> | mmAC1101 | 346  | 28.6 | 5 | 6 | 0.9999 | R | ALGEDGMVSSSLPENPTAQK                       | S                       | 2 | 2029.9626 | 2031.9715 | 2.0089    | -2.0067 | 1.08    | 4.533 | 0.293 | 835.6 | 1    | 22 | 38  | 2  | 0 | 1 |   |
| Q5V342_HALMA | 1 | Hypothetical protein                                       | <i>rrnAC1101</i> | mmAC1101 | 346  | 28.6 | 5 | 6 | 0.9867 | T | DRFAAIYDDLIGDAPTATAEER                     | T                       | 3 | 2409.1448 | 2409.1475 | 0.0027    | 0       | 1.12    | 2.515 | 0.101 | 462.9 | 1    | 28 | 84  | 2  | 1 | 1 |   |
| Q5V342_HALMA | 1 | Hypothetical protein                                       | <i>rrnAC1101</i> | mmAC1101 | 346  | 28.6 | 5 | 6 | 0.9992 | - | R                                          | DFFAAIYDDLIGDAPTATAEERT | - | 3         | 2510.1925 | 2511.2180 | 1.0255  | -1.0034 | 8.82  | 3.433 | 0.236 | 1504 | 1  | 33  | 88 | 2 | 2 | 1 |
| Q5V342_HALMA | 1 | Hypothetical protein                                       | <i>rrnAC1101</i> | mmAC1101 | 346  | 28.6 | 5 | 6 | 1      | K | SEVVAEGLQASSLEPGDAANEPK                    | R                       | 2 | 2297.1023 | 2297.1045 | 0.0022    | 0       | 0.96    | 3.954 | 0.488 | 1058  | 1    | 26 | 44  | 2  | 0 | 1 |   |
| Q5V359_HALMA | 1 | Glucose-1-phosphate thymidyltransferase                    | <i>rffH1</i>     | mmAC1081 | 393  | 13.2 | 3 |   |        |   |                                            |                         |   |           |           |           |         |         |       |       |       |      |    |     |    |   |   |   |

|                   |   |                                            |                |          |     |      |   |   |        |   |                                          |   |   |           |           |         |         |         |       |       |       |    |    |     |   |   |   |
|-------------------|---|--------------------------------------------|----------------|----------|-----|------|---|---|--------|---|------------------------------------------|---|---|-----------|-----------|---------|---------|---------|-------|-------|-------|----|----|-----|---|---|---|
| Q5V522_HALMA      | 1 | Acetolactate synthase (EC 2.2.1.6)         | <i>ilvB2</i>   | mmAC0330 | 585 | 9.2  | 2 | 6 | 1      | K | ESYFAADSDTVGDDVSEAFALADAGR               | Q | 2 | 2678.1620 | 2679.1653 | 1.0033  | -1.0034 | -0.02   | 5.183 | 0.617 | 1650  | 1  | 29 | 50  | 2 | 0 | 1 |
| Q5V522_HALMA      | 1 | Acetolactate synthase (EC 2.2.1.6)         | <i>ilvB2</i>   | mmAC0330 | 585 | 9.2  | 2 | 6 | 1      | K | ESYFAADSDTVGDDVSEAFALADAGR               | Q | 2 | 2678.1620 | 2678.1958 | 0.0338  | 0       | 12.62   | 4.947 | 0.606 | 1268  | 1  | 26 | 50  | 2 | 0 | 1 |
| Q5V522_HALMA      | 1 | Acetolactate synthase (EC 2.2.1.6)         | <i>ilvB2</i>   | mmAC0330 | 585 | 9.2  | 2 | 6 | 1      | K | ESYFAADSDTVGDDVSEAFALADAGR               | Q | 2 | 2678.1620 | 2678.1707 | 0.0087  | 0       | 3.25    | 5.261 | 0.668 | 1429  | 1  | 27 | 50  | 2 | 0 | 1 |
| Q5V576_HALMA      | 1 | GTP-binding protein                        | <i>gbp1</i>    | mmAC0269 | 393 | 30.3 | 4 | 6 | 0.9990 | R | YVPVELIDVAGLVPGAHEGR                     | G | 3 | 2090.1160 | 2090.1228 | 0.0068  | 0       | 3.25    | 2.216 | 0.232 | 390.8 | 1  | 32 | 76  | 2 | 0 | 1 |
| Q5V576_HALMA      | 1 | GTP-binding protein                        | <i>gbp1</i>    | mmAC0269 | 393 | 30.3 | 4 | 6 | 0.9985 | K | DLAYAVHSDIGDGYIHAVDAR                    | E | 3 | 2257.0763 | 2257.2007 | 0.1244  | 0       | 55.12   | 2.88  | 0.183 | 749.9 | 4  | 26 | 80  | 2 | 0 | 1 |
| Q5V576_HALMA      | 1 | GTP-binding protein                        | <i>gbp1</i>    | mmAC0269 | 393 | 30.3 | 4 | 6 | 0.9956 | R | GVMDMDWGGTVGQALDTAVYDLLDHLTAYPVQNETHWTDG | Q | 4 | 5712.7107 | 5714.7305 | 2.0198  | -2.0067 | 2.29    | 3.47  | 0.13  | 548.6 | 1  | 44 | 306 | 2 | 0 | 1 |
| Q5V576_HALMA      | 1 | GTP-binding protein                        | <i>gbp1</i>    | mmAC0269 | 393 | 30.3 | 4 | 6 | 1      | R | SPDFKLDLSLVDMLAGVGASELDVAR               | T | 3 | 2733.3531 | 2733.3582 | 0.0051  | 0       | 1.87    | 3.751 | 0.399 | 1043  | 1  | 35 | 100 | 2 | 1 | 1 |
| Q5V576_HALMA      | 1 | GTP-binding protein                        | <i>gbp1</i>    | mmAC0269 | 393 | 30.3 | 4 | 6 | 0.9997 | R | SPDFKLDLSLVDMLAGVGASELDVAR               | T | 3 | 2733.3531 | 2733.3601 | 0.0070  | 0       | 2.56    | 3.085 | 0.243 | 1359  | 1  | 34 | 100 | 2 | 1 | 1 |
| Q5V5M8_HALMA      | 1 | Medium-chain acyl-CoA ligase               | <i>alkK1</i>   | mmAC0098 | 533 | 14.4 | 4 | 6 | 0.9979 | R | VNQLAHALSDRGGVSK                         | G | 3 | 1593.8587 | 1593.8073 | -0.0514 | 0       | -32.25  | 2.469 | 0.24  | 287.2 | 41 | 21 | 56  | 2 | 1 | 1 |
| Q5V5M8_HALMA      | 1 | Medium-chain acyl-CoA ligase               | <i>alkK1</i>   | mmAC0098 | 533 | 14.4 | 4 | 6 | 1      | K | AAVPTPSEDWGGETPMAIVPTADSDATEQDILEFLRER   | V | 3 | 4269.0787 | 4269.0991 | 0.0204  | 0       | 4.78    | 2.712 | 0.456 | 523.9 | 1  | 41 | 152 | 2 | 1 | 1 |
| Q5V5M8_HALMA      | 1 | Medium-chain acyl-CoA ligase               | <i>alkK1</i>   | mmAC0098 | 533 | 14.4 | 4 | 6 | 0.9982 | R | ANDGDVVTTQGDRLDVR                        | I | 3 | 1615.7550 | 1615.7565 | 0.0015  | 0       | 0.93    | 2.651 | 0.161 | 1302  | 1  | 28 | 56  | 2 | 1 | 1 |
| Q5V5M8_HALMA      | 1 | Medium-chain acyl-CoA ligase               | <i>alkK1</i>   | mmAC0098 | 533 | 14.4 | 4 | 6 | 0.9781 | R | ANDGDVVTTQGDRLDVR                        | I | 3 | 1615.7550 | 1615.7562 | 0.0012  | 0       | 0.74    | 2.198 | 0.088 | 1239  | 1  | 26 | 56  | 2 | 1 | 1 |
| Q5V5M8_HALMA      | 1 | Medium-chain acyl-CoA ligase               | <i>alkK1</i>   | mmAC0098 | 533 | 14.4 | 4 | 6 | 0.9673 | R | ANDGDVVTTQGDRLDVR                        | I | 3 | 1615.7550 | 1615.7583 | 0.0033  | 0       | 2.04    | 2.662 | 0.019 | 1343  | 1  | 28 | 56  | 2 | 1 | 1 |
| Q5V5M8_HALMA      | 1 | Medium-chain acyl-CoA ligase               | <i>alkK1</i>   | mmAC0098 | 533 | 14.4 | 4 | 6 | 0.9733 | R | VEDEFGWR                                 | I | 2 | 1036.4614 | 1036.2654 | -0.1960 | 0       | -189.10 | 1.538 | 0.128 | 584.5 | 5  | 12 | 14  | 2 | 0 | 1 |
| Q5V5V1_HALMA      | 1 | Transcription initiation factor IIB        | <i>tjbA</i>    | mmAC0016 | 319 | 24.1 | 4 | 6 | 0.9994 | R | SLEEVSDVSRVEQKEIGR                       | T | 3 | 2059.0545 | 2061.0681 | 2.0136  | -2.0067 | 3.35    | 3.948 | 0.203 | 1211  | 1  | 32 | 68  | 2 | 2 | 1 |
| Q5V5V1_HALMA      | 1 | Transcription initiation factor IIB        | <i>tjbA</i>    | mmAC0016 | 319 | 24.1 | 4 | 6 | 1      | R | NLQFALSEIDR                              | T | 2 | 1304.6724 | 1305.6654 | 0.9930  | -1.0034 | -7.93   | 3.113 | 0.391 | 1667  | 1  | 17 | 20  | 2 | 0 | 1 |
| Q5V5V1_HALMA      | 1 | Transcription initiation factor IIB        | <i>tjbA</i>    | mmAC0016 | 319 | 24.1 | 4 | 6 | 0.9990 | R | SLEEVSDVSRVEQKEIGR                       | M | 3 | 2059.0545 | 2059.0557 | 0.0012  | 0       | 0.58    | 3.472 | 0.134 | 976.2 | 1  | 29 | 68  | 2 | 2 | 1 |
| Q5V5V1_HALMA      | 1 | Transcription initiation factor IIB        | <i>tjbA</i>    | mmAC0016 | 319 | 24.1 | 4 | 6 | 0.9986 | R | SLEEVSDVSRVEQKEIGR                       | T | 3 | 2059.0545 | 2059.0581 | 0.0036  | 0       | 1.75    | 4.037 | 0.083 | 1397  | 1  | 32 | 68  | 2 | 2 | 1 |
| Q5V6C4_HALMA      | 1 | Hypothetical protein                       | <i>pNG7225</i> | pNG7225  | 596 | 12.1 | 3 | 6 | 1      | R | DGQEASLDALSEGELELIGFVAALAGR              | Q | 3 | 2730.3712 | 2731.3780 | 1.0068  | -1.0034 | 1.26    | 4.779 | 0.356 | 1141  | 1  | 32 | 104 | 2 | 0 | 1 |
| Q5V6C4_HALMA      | 1 | Hypothetical protein                       | <i>pNG7225</i> | pNG7225  | 596 | 12.1 | 3 | 6 | 1      | R | AGENLEDVLLRPLDFQNDIAQIETLOR              | E | 3 | 3109.6044 | 3109.6294 | 0.0250  | 0       | 8.04    | 5.337 | 0.532 | 797   | 1  | 29 | 104 | 2 | 0 | 1 |
| Q5V6C4_HALMA      | 1 | Hypothetical protein                       | <i>pNG7225</i> | pNG7225  | 596 | 12.1 | 3 | 6 | 1      | R | DGQEASLDALSEGELELIGFVAALAGR              | Q | 3 | 2730.3712 | 2730.3794 | 0.0082  | 0       | 3.00    | 5.389 | 0.369 | 2902  | 1  | 46 | 104 | 2 | 0 | 1 |
| Q5V6C4_HALMA      | 1 | Hypothetical protein                       | <i>pNG7225</i> | pNG7225  | 596 | 12.1 | 3 | 6 | 0.9999 | R | DGQEASLDALSEGELELIGFVAALAGR              | Q | 3 | 2730.3712 | 2731.3880 | 1.0168  | -1.0034 | 4.93    | 3.823 | 0.312 | 1997  | 1  | 33 | 104 | 2 | 0 | 1 |
| Q5V6C4_HALMA      | 1 | Hypothetical protein                       | <i>pNG7225</i> | pNG7225  | 596 | 12.1 | 3 | 6 | 0.9237 | R | DGQEASLDALSEGELELIGFVAALAGR              | Q | 3 | 2730.3712 | 2731.3880 | 1.0168  | -1.0034 | 4.93    | 3.078 | 0.053 | 706.5 | 3  | 25 | 104 | 2 | 0 | 1 |
| Q5V6I2_HALMA      | 1 | N-methylhydantoinase A (EC 3.5.2.9)        | <i>hyuA</i>    | pNG7164  | 664 | 11.6 | 5 | 6 | 0.9986 | R | SAPPVKYTAEGDPQKGR                        | E | 3 | 1896.9693 | 1896.9718 | 0.0025  | 0       | 1.32    | 1.986 | 0.253 | 491.6 | 1  | 28 | 68  | 2 | 2 | 1 |
| Q5V6I2_HALMA      | 1 | N-methylhydantoinase A (EC 3.5.2.9)        | <i>hyuA</i>    | pNG7164  | 664 | 11.6 | 5 | 6 | 0.9968 | R | SAPPVKYTAEGDPQK                          | G | 2 | 1586.7940 | 1586.7975 | 0.0035  | 0       | 2.21    | 2.548 | 0.194 | 388.3 | 1  | 17 | 28  | 2 | 1 | 1 |
| Q5V6I2_HALMA      | 1 | N-methylhydantoinase A (EC 3.5.2.9)        | <i>hyuA</i>    | pNG7164  | 664 | 11.6 | 5 | 6 | 0.9946 | R | SAPPVKYTAEGDPQKGR                        | E | 3 | 1896.9693 | 1898.9252 | 1.9559  | -2.0067 | -26.78  | 2.166 | 0.247 | 284.7 | 1  | 24 | 68  | 2 | 2 | 1 |
| Q5V6I2_HALMA      | 1 | N-methylhydantoinase A (EC 3.5.2.9)        | <i>hyuA</i>    | pNG7164  | 664 | 11.6 | 5 | 6 | 1      | R | TTTDGVEQPVNDEVR                          | S | 2 | 1787.8173 | 1787.8228 | 0.0055  | 0       | 3.08    | 4.551 | 0.439 | 959.5 | 1  | 21 | 30  | 2 | 0 | 1 |
| Q5V6Q4_HALMA      | 1 | Putative universal stress protein family   | <i>usp23</i>   | pNG7083  | 144 | 78.5 | 4 | 6 | 1      | R | AFLSMDDEMQDEVLENLRAEGEETA1               | A | 4 | 4998.2982 | 4998.2759 | -0.0223 | 0       | -4.46   | 5.174 | 0.383 | 521.5 | 3  | 39 | 264 | 2 | 2 | 1 |
| Q5V6Q4_HALMA      | 1 | Putative universal stress protein family   | <i>usp23</i>   | pNG7083  | 144 | 78.5 | 4 | 6 | 1      | R | AFLSMDDEMQDEVLENLRAEGEETA1               | D | 3 | 3254.4707 | 3254.4807 | 0.0100  | 0       | 3.07    | 3.734 | 0.306 | 885.5 | 1  | 29 | 112 | 2 | 1 | 1 |
| Q5V6Q4_HALMA      | 1 | Putative universal stress protein family   | <i>usp23</i>   | pNG7083  | 144 | 78.5 | 4 | 6 | 1      | R | AFLSMDDEMQDEVLENLRAEGEETA1               | D | 3 | 3254.4707 | 3255.4883 | 1.0176  | -1.0034 | 4.38    | 4.611 | 0.509 | 1513  | 1  | 37 | 112 | 2 | 1 | 1 |
| Q5V6Q4_HALMA      | 1 | Putative universal stress protein family   | <i>usp23</i>   | pNG7083  | 144 | 78.5 | 4 | 6 | 1      | R | AFLSMDDEMQDEVLENLRAEGEETA1               | D | 4 | 4998.2982 | 4999.2886 | 0.9904  | -1.0034 | -2.59   | 5.713 | 0.456 | 1085  | 1  | 51 | 264 | 2 | 2 | 1 |
| Q5V7X2_HALMA      | 1 | Hypothetical protein                       | <i>pNG4050</i> | pNG4050  | 265 | 21.9 | 4 | 6 | 0.9124 | R | TTVAGLIAAIVLGIER                         | D | 3 | 1482.8770 | 1482.8781 | 0.0011  | 0       | 0.74    | 2.304 | 0.044 | 396   | 39 | 20 | 56  | 2 | 0 | 1 |
| Q5V7X2_HALMA      | 1 | Hypothetical protein                       | <i>pNG4050</i> | pNG4050  | 265 | 21.9 | 4 | 6 | 0.9714 | K | LPDPMDLR                                 | Q | 2 | 955.4797  | 955.4854  | 0.0057  | 0       | 5.97    | 1.782 | 0.092 | 486.4 | 19 | 10 | 14  | 2 | 0 | 1 |
| Q5V7X2_HALMA      | 1 | Hypothetical protein                       | <i>pNG4050</i> | pNG4050  | 265 | 21.9 | 4 | 6 | 1      | R | TLNMPVNALSTAADNLK                        | S | 2 | 1771.9138 | 1771.9196 | 0.0058  | 0       | 3.27    | 4.493 | 0.469 | 1415  | 1  | 25 | 32  | 2 | 0 | 1 |
| Q5V7X2_HALMA      | 1 | Hypothetical protein                       | <i>pNG4050</i> | pNG4050  | 265 | 21.9 | 4 | 6 | 1      | R | TTTAFTTYAYNPDAEPLR                       | V | 2 | 2030.9585 | 2030.9639 | 0.0054  | 0       | 2.66    | 3.011 | 0.37  | 706.6 | 1  | 16 | 34  | 2 | 0 | 1 |
| Q5V7X2_HALMA      | 1 | Hypothetical protein                       | <i>pNG4050</i> | pNG4050  | 265 | 21.9 | 4 | 6 | 1      | R | TTVAGLIAAIVLGIER                         | D | 2 | 1482.8770 | 1482.8842 | 0.0072  | 0       | 4.86    | 3.259 | 0.401 | 1354  | 1  | 21 | 28  | 2 | 0 | 1 |
| Q5V7X2_HALMA      | 1 | Hypothetical protein                       | <i>pNG4050</i> | pNG4050  | 265 | 21.9 | 4 | 6 | 0.9426 | R | TTVAGLIAAIVLGIER                         | D | 3 | 1482.8770 | 1482.8803 | 0.0033  | 0       | 2.23    | 2.073 | 0.114 | 347.8 | 93 | 18 | 56  | 2 | 0 | 1 |
| RL15_HALMARReview | 1 | 50S ribosomal protein L15P (Hmal15) (H19)  | <i>rpl15p</i>  | mmAC1590 | 165 | 26.1 | 3 | 6 | 1      | R | HELTLIADDFSEGAR                          | E | 3 | 1672.8056 | 1672.8090 | 0.0034  | 0       | 2.03    | 3.116 | 0.343 | 1029  | 1  | 26 | 56  | 2 | 0 | 1 |
| RL15_HALMARReview | 1 | 50S ribosomal protein L15P (Hmal15) (H19)  | <i>rpl15p</i>  | mmAC1590 | 165 | 26.1 | 3 | 6 | 1      | R | EKVEGAGGSVEL.TDLGEER                     | Q | 3 | 1973.9541 | 1973.9558 | 0.0017  | 0       | 0.86    | 3.455 | 0.33  | 1415  | 1  | 32 | 72  | 2 | 1 | 1 |
| RL15_HALMARReview | 1 | 50S ribosomal protein L15P (Hmal15) (H19)  | <i>rpl15p</i>  | mmAC1590 | 165 | 26.1 | 3 | 6 | 0.9609 | R | HELTLIADDFSEGAR                          | E | 3 | 1672.8056 | 1672.8090 | 0.0034  | 0       | 2.03    | 2.172 | 0.112 | 466.8 | 45 | 20 | 56  | 2 | 0 | 1 |
| RL15_HALMARReview | 1 | 50S ribosomal protein L15P (Hmal15) (H19)  | <i>rpl15p</i>  | mmAC1590 | 165 | 26.1 | 3 | 6 | 0.9794 | R | RGAGHRGGR                                | G | 2 | 922.4958  | 922.2854  | -0.2104 | 0       | -228.08 | 1.748 | 0.179 | 404   | 1  | 11 | 16  | 2 | 1 | 1 |
| RL29_HALMARReview | 1 | 50S ribosomal protein L29P (Hmal29) (H133) | <i>rpl29p</i>  | mmAC1604 | 71  | 43.7 | 3 | 6 | 1      | R | EAELDDLKTELLNAR                          | A | 2 | 1728.8894 | 1728.8920 | 0.0026  | 0       | 1.50    | 3.945 | 0.4   | 953.8 | 1  | 21 | 28  | 2 | 1 | 1 |
| RL29_HALMARReview | 1 | 50S ribosomal protein L29P (Hmal29) (H133) | <i>rpl29p</i>  | mmAC1604 | 71  | 43.7 | 3 | 6 | 1      | R | EAELDDLKTELLNAR                          | A | 2 | 1728.8894 | 1728.8928 | 0.0034  | 0       | 1.97    | 3.935 | 0.401 | 873.6 | 1  | 20 | 28  | 2 | 1 | 1 |
| RL29_HALMARReview | 1 | 50S ribosomal protein L29P (Hmal29) (H133) | <i>rpl29p</i>  | mmAC1604 | 71  | 43.7 | 3 | 6 | 1      | R | EAELDDLKTELLNAR                          | A | 2 | 1728.8894 | 1728.8928 | 0.0034  | 0       | 1.97    | 4.003 | 0.377 | 958.2 | 1  | 20 | 28  | 2 | 1 | 1 |
| RL29_HALMARReview | 1 | 50S ribosomal protein L29P (Hmal29) (H133) | <i>rpl29p</i>  | mmAC1604 | 71  | 43.7 | 3 | 6 | 0.9324 | R | EAELDDLKTELLNAR                          | A | 3 | 1728.8894 | 1728.8913 | 0.0019  | 0       | 1.10    | 2.268 | 0.017 | 997.4 | 1  | 24 | 56  | 2 | 1 | 1 |
| RL32_HALMARReview | 1 | 50S ribosomal protein L32e (H15)           | <i>rpl32e</i>  | mmAC1595 | 241 | 20.3 | 3 | 6 | 1      | R | GADQSAADVSGIGNALAAR                      | I | 3 | 1855.9388 | 1855.9403 | 0.0015  | 0       | 0.81    | 3.419 | 0.344 | 2072  | 1  | 35 | 76  | 2 | 0 | 1 |
| RL32_HALMARReview | 1 | 50S ribosomal protein L32e (H15)           | <i>rpl32e</i>  | mmAC1595 | 241 | 20.3 | 3 | 6 | 1      | R | GADQSAADVSGIGNALAAR                      | I | 2 | 1855.9388 | 1855.9424 | 0.0036  | 0       | 1.94    | 4.011 | 0.506 | 973.1 | 1  | 22 | 38  | 2 | 0 | 1 |
| RL32_HALMARReview | 1 | 50S ribosomal protein L32e (H15)           | <i>rpl32e</i>  | mmAC1595 | 241 | 20.3 | 3 | 6 | 1      | R | GADQSAADVSGIGNALAAR                      | I | 2 | 1855.9388 | 1855.9445 | 0.0057  | 0       | 3.07    | 5.007 | 0.537 | 2547  | 1  | 27 | 38  | 2 | 0 | 1 |
| RL32_HALMARReview | 1 | 50S ribosomal protein L32e (H15)           | <i>rpl32e</i>  | mmAC1595 | 241 | 20.3 | 3 | 6 | 0.9997 | R | IEEEAEDAGIR                              | V | 2 | 1230.5728 | 1230.5720 | -0.0008 | 0       | -0.65   | 3.006 | 0.114 | 1090  | 1  | 17 | 20  | 2 |   |   |

[illegible]

|              |   |                                              |                 |          |     |      |   |   |        |   |                                |   |   |           |           |         |         |        |       |       |       |    |    |     |   |   |   |
|--------------|---|----------------------------------------------|-----------------|----------|-----|------|---|---|--------|---|--------------------------------|---|---|-----------|-----------|---------|---------|--------|-------|-------|-------|----|----|-----|---|---|---|
| Q5V237_HALMA | 1 | Hypothetical protein                         | <i>rmAC1492</i> | mmAC1492 | 56  | 58.9 | 2 | 5 | 0.9859 | M | SLELEHYCPECEEYRDFWK            | V | 3 | 2475.0511 | 2473.0371 | -2.0140 | 2       | -5.66  | 3.98  | 0.362 | 1159  | 1  | 28 | 72  | 2 | 1 | 1 |
| Q5V237_HALMA | 1 | Hypothetical protein                         | <i>rmAC1492</i> | mmAC1492 | 56  | 58.9 | 2 | 5 | 0.9319 | M | SLELEHYCPECEEYRDFWK            | V | 3 | 2475.0511 | 2473.0435 | -2.0076 | 2       | -3.07  | 3.742 | 0.305 | 1210  | 1  | 28 | 72  | 2 | 1 | 1 |
| Q5V237_HALMA | 1 | Hypothetical protein                         | <i>rmAC1492</i> | mmAC1492 | 56  | 58.9 | 2 | 5 | 0.9985 | K | VKWHCEPCDYGIFVR                | I | 3 | 1737.7755 | 1736.7682 | -1.0073 | 1       | -15.71 | 3.345 | 0.264 | 997.9 | 1  | 24 | 52  | 2 | 1 | 1 |
| Q5V242_HALMA | 1 | NADH dehydrogenase (EC 1.6.99.3)             | <i>yjlD4</i>    | mmAC1485 | 380 | 7.1  | 2 | 5 | 1      | R | VVDSGDGEAVPASAAAAIR            | E | 2 | 1697.8584 | 1698.7053 | 0.8469  | -1.0034 | -92.15 | 5.332 | 0.423 | 1223  | 1  | 27 | 34  | 2 | 0 | 1 |
| Q5V242_HALMA | 1 | NADH dehydrogenase (EC 1.6.99.3)             | <i>yjlD4</i>    | mmAC1485 | 380 | 7.1  | 2 | 5 | 1      | K | VGPSVLTLGR                     | A | 2 | 884.5079  | 884.5055  | -0.0024 | 0       | -2.71  | 2.47  | 0.287 | 373.8 | 1  | 13 | 16  | 2 | 0 | 1 |
| Q5V242_HALMA | 1 | NADH dehydrogenase (EC 1.6.99.3)             | <i>yjlD4</i>    | mmAC1485 | 380 | 7.1  | 2 | 5 | 0.9997 | K | VGPSVLTLGR                     | A | 2 | 884.5079  | 884.5055  | -0.0024 | 0       | -2.71  | 2.224 | 0.23  | 371.6 | 1  | 13 | 16  | 2 | 0 | 1 |
| Q5V242_HALMA | 1 | NADH dehydrogenase (EC 1.6.99.3)             | <i>yjlD4</i>    | mmAC1485 | 380 | 7.1  | 2 | 5 | 0.9993 | K | VGPSVLTLGR                     | A | 2 | 884.5079  | 884.5055  | -0.0024 | 0       | -2.71  | 2.386 | 0.23  | 302.3 | 28 | 11 | 16  | 2 | 0 | 1 |
| Q5V268_HALMA | 1 | Metallo-beta-lactamase superfamily protein   | <i>rmAC1459</i> | mmAC1459 | 315 | 19   | 3 | 5 | 1      | R | VSIIPTFQVGPVNAYIAR             | R | 2 | 1928.0520 | 1929.0653 | 1.0133  | -1.0034 | 5.16   | 3.469 | 0.438 | 430.1 | 1  | 19 | 34  | 2 | 0 | 1 |
| Q5V268_HALMA | 1 | Metallo-beta-lactamase superfamily protein   | <i>rmAC1459</i> | mmAC1459 | 315 | 19   | 3 | 5 | 1      | R | VSIIPTFQVGPVNAYIAR             | R | 2 | 1928.0520 | 1928.0545 | 0.0025  | 0       | 1.30   | 3.132 | 0.369 | 459.4 | 1  | 20 | 34  | 2 | 0 | 1 |
| Q5V283_HALMA | 1 | Hypothetical protein                         | <i>rmAC1443</i> | mmAC1443 | 465 | 7.5  | 2 | 5 | 0.9999 | R | ALGAIGSAESVQPVANRLDADSEEV      | S | 3 | 2653.3307 | 2653.3357 | 0.0050  | 0       | 1.88   | 2.599 | 0.34  | 918.8 | 1  | 35 | 100 | 2 | 1 | 1 |
| Q5V283_HALMA | 1 | Hypothetical protein                         | <i>rmAC1443</i> | mmAC1443 | 465 | 7.5  | 2 | 5 | 1      | R | ALGAIGSAESVQPVANRLDADSEEV      | S | 3 | 2653.3307 | 2653.3413 | 0.0106  | 0       | 3.99   | 3.698 | 0.449 | 935.8 | 1  | 36 | 100 | 2 | 1 | 1 |
| Q5V283_HALMA | 1 | Hypothetical protein                         | <i>rmAC1443</i> | mmAC1443 | 465 | 7.5  | 2 | 5 | 0.9996 | R | ALGAIGSAESVQPVANRLDADSEEV      | S | 3 | 2653.3307 | 2653.3369 | 0.0062  | 0       | 2.34   | 2.602 | 0.259 | 812.2 | 1  | 34 | 100 | 2 | 1 | 1 |
| Q5V283_HALMA | 1 | Hypothetical protein                         | <i>rmAC1443</i> | mmAC1443 | 465 | 7.5  | 2 | 5 | 0.9804 | R | ALGAIGSAESVQPVANRLDADSEEV      | S | 2 | 2653.3307 | 2653.3416 | 0.0109  | 0       | 4.11   | 2.23  | 0.147 | 225   | 2  | 15 | 50  | 2 | 1 | 1 |
| Q5V283_HALMA | 1 | Hypothetical protein                         | <i>rmAC1443</i> | mmAC1443 | 465 | 7.5  | 2 | 5 | 0.9999 | R | ALGLLGDRTR                     | A | 2 | 914.5185  | 914.5254  | 0.0069  | 0       | 7.54   | 2.51  | 0.254 | 703.4 | 1  | 13 | 16  | 2 | 0 | 1 |
| Q5V2B4_HALMA | 1 | Lactoylglutathione lyase (EC 4.4.1.5)        | <i>gloA1</i>    | mmAC1409 | 250 | 14   | 2 | 5 | 1      | R | SYELGDAGWHLAVQTDDLHGAWETLMGR   | H | 3 | 3127.4458 | 3128.4678 | 1.0220  | -1.0034 | 5.96   | 5.386 | 0.547 | 868   | 1  | 33 | 108 | 2 | 0 | 1 |
| Q5V2B4_HALMA | 1 | Lactoylglutathione lyase (EC 4.4.1.5)        | <i>gloA1</i>    | mmAC1409 | 250 | 14   | 2 | 5 | 0.9999 | K | LNLYELFR                       | R | 2 | 953.4970  | 953.4982  | 0.0012  | 0       | 1.26   | 2.462 | 0.228 | 608.3 | 1  | 11 | 12  | 2 | 0 | 1 |
| Q5V2B4_HALMA | 1 | Lactoylglutathione lyase (EC 4.4.1.5)        | <i>gloA1</i>    | mmAC1409 | 250 | 14   | 2 | 5 | 1      | R | SYELGDAGWHLAVQTDDLHGAWETLMGR   | H | 3 | 3127.4458 | 3128.4678 | 1.0220  | -1.0034 | 5.96   | 5.124 | 0.495 | 2347  | 1  | 41 | 108 | 2 | 0 | 1 |
| Q5V2B4_HALMA | 1 | Lactoylglutathione lyase (EC 4.4.1.5)        | <i>gloA1</i>    | mmAC1409 | 250 | 14   | 2 | 5 | 1      | R | SYELGDAGWHLAVQTDDLHGAWETLMGR   | H | 3 | 3127.4458 | 3128.4678 | 1.0220  | -1.0034 | 5.96   | 5.887 | 0.468 | 1846  | 1  | 39 | 108 | 2 | 0 | 1 |
| Q5V2B4_HALMA | 1 | Lactoylglutathione lyase (EC 4.4.1.5)        | <i>gloA1</i>    | mmAC1409 | 250 | 14   | 2 | 5 | 1      | R | SYELGDAGWHLAVQTDDLHGAWETLMGR   | H | 3 | 3127.4458 | 3128.4678 | 1.0220  | -1.0034 | 5.96   | 6.439 | 0.539 | 2287  | 1  | 42 | 108 | 2 | 0 | 1 |
| Q5V2C1_HALMA | 1 | Alcohol dehydrogenase (EC 1.1.1.1)           | <i>adh4</i>     | mmAC1402 | 347 | 14.1 | 2 | 5 | 0.9970 | R | GAVDLHTTQYDLGDVNTVAQMLEDR      | A | 4 | 3330.5786 | 3330.5862 | 0.0076  | 0       | 2.28   | 3.517 | 0.12  | 784.9 | 3  | 41 | 174 | 2 | 1 | 1 |
| Q5V2C1_HALMA | 1 | Alcohol dehydrogenase (EC 1.1.1.1)           | <i>adh4</i>     | mmAC1402 | 347 | 14.1 | 2 | 5 | 1      | R | GAVDLHTTQYDLGDVNTVAQMLEDR      | A | 4 | 3330.5786 | 3330.5845 | 0.0059  | 0       | 1.77   | 4.54  | 0.326 | 1021  | 1  | 46 | 174 | 2 | 1 | 1 |
| Q5V2C1_HALMA | 1 | Alcohol dehydrogenase (EC 1.1.1.1)           | <i>adh4</i>     | mmAC1402 | 347 | 14.1 | 2 | 5 | 1      | R | GAVDLHTTQYDLGDVNTVAQMLEDR      | A | 3 | 3330.5786 | 3331.5938 | 1.0152  | -1.0034 | 3.56   | 4.738 | 0.456 | 1211  | 1  | 35 | 116 | 2 | 1 | 1 |
| Q5V2C1_HALMA | 1 | Alcohol dehydrogenase (EC 1.1.1.1)           | <i>adh4</i>     | mmAC1402 | 347 | 14.1 | 2 | 5 | 0.9998 | R | GAVDLHTTQYDLGDVNTVAQMLEDR      | A | 4 | 3330.5786 | 3330.5799 | 0.0013  | 0       | 0.39   | 3.726 | 0.206 | 1178  | 1  | 50 | 174 | 2 | 1 | 1 |
| Q5V2C1_HALMA | 1 | Alcohol dehydrogenase (EC 1.1.1.1)           | <i>adh4</i>     | mmAC1402 | 347 | 14.1 | 2 | 5 | 0.9997 | D | PADLAPHADAGITAYHAAK            | K | 4 | 1888.9431 | 1888.9448 | 0.0017  | 0       | 0.90   | 4.415 | 0.347 | 2414  | 1  | 44 | 108 | 1 | 0 | 1 |
| Q5V2P2_HALMA | 1 | Transcription regulator AsnC family          | <i>asnC2</i>    | mmAC1269 | 142 | 22.5 | 1 | 5 | 1      | R | AMDGDSLADVIEDKILALDGVTA        | L | 4 | 3396.6871 | 3396.6988 | 0.0117  | 0       | 3.44   | 4.921 | 0.463 | 1205  | 1  | 54 | 186 | 2 | 1 | 1 |
| Q5V2P2_HALMA | 1 | Transcription regulator AsnC family          | <i>asnC2</i>    | mmAC1269 | 142 | 22.5 | 1 | 5 | 1      | R | AMDGDSLADVIEDKILALDGVTA        | L | 4 | 3396.6871 | 3397.6909 | 1.0038  | -1.0034 | 0.13   | 4.27  | 0.412 | 1319  | 1  | 57 | 186 | 2 | 1 | 1 |
| Q5V2P2_HALMA | 1 | Transcription regulator AsnC family          | <i>asnC2</i>    | mmAC1269 | 142 | 22.5 | 1 | 5 | 1      | R | AMDGDSLADVIEDKILALDGVTA        | L | 4 | 3396.6871 | 3396.7178 | 0.0307  | 0       | 9.04   | 4.446 | 0.565 | 1025  | 1  | 53 | 186 | 2 | 1 | 1 |
| Q5V2P2_HALMA | 1 | Transcription regulator AsnC family          | <i>asnC2</i>    | mmAC1269 | 142 | 22.5 | 1 | 5 | 1      | R | AMDGDSLADVIEDKILALDGVTA        | L | 3 | 3396.6871 | 3396.7202 | 0.0331  | 0       | 9.74   | 6.09  | 0.506 | 2012  | 1  | 37 | 124 | 2 | 1 | 1 |
| Q5V2P2_HALMA | 1 | Transcription regulator AsnC family          | <i>asnC2</i>    | mmAC1269 | 142 | 22.5 | 1 | 5 | 1      | R | AMDGDSLADVIEDKILALDGVTA        | L | 4 | 3396.6871 | 3396.7019 | 0.0148  | 0       | 4.36   | 5.137 | 0.498 | 1384  | 1  | 61 | 186 | 2 | 1 | 1 |
| Q5V3S8_HALMA | 1 | Transcription repressor CinR                 | <i>cinR</i>     | mmAC0842 | 116 | 26.7 | 4 | 5 | 0.9999 | R | IVESLFKDLQIR                   | E | 3 | 1588.8824 | 1588.8864 | 0.0040  | 0       | 2.52   | 2.419 | 0.333 | 382.4 | 1  | 22 | 48  | 2 | 1 | 1 |
| Q5V3S8_HALMA | 1 | Transcription repressor CinR                 | <i>cinR</i>     | mmAC0842 | 116 | 26.7 | 4 | 5 | 1      | R | EETVYEGHNTYYLTPAAR             | D | 2 | 2112.9752 | 2113.9654 | 0.9902  | -1.0034 | -6.22  | 3.703 | 0.51  | 540.2 | 1  | 17 | 34  | 2 | 0 | 1 |
| Q5V3S8_HALMA | 1 | Transcription repressor CinR                 | <i>cinR</i>     | mmAC0842 | 116 | 26.7 | 4 | 5 | 0.9011 | R | IVESLFEEK                      | D | 2 | 963.5277  | 963.5291  | 0.0014  | 0       | 1.45   | 1.566 | 0.077 | 271.4 | 36 | 10 | 14  | 2 | 0 | 1 |
| Q5V3S8_HALMA | 1 | Transcription repressor CinR                 | <i>cinR</i>     | mmAC0842 | 116 | 26.7 | 4 | 5 | 1      | R | IVESLFKDLQIREETVYEGHNTYYLTPAAR | D | 4 | 3683.8471 | 3683.8604 | 0.0133  | 0       | 3.61   | 5.525 | 0.427 | 2156  | 1  | 46 | 180 | 2 | 2 | 1 |
| Q5V3S8_HALMA | 1 | Transcription repressor CinR                 | <i>cinR</i>     | mmAC0842 | 116 | 26.7 | 4 | 5 | 1      | R | IVESLFKDLQIREETVYEGHNTYYLTPAAR | D | 4 | 3683.8471 | 3683.8570 | 0.0099  | 0       | 2.69   | 5.325 | 0.403 | 1986  | 1  | 45 | 180 | 2 | 2 | 1 |
| Q5V407_HALMA | 1 | Trk potassium uptake system protein          | <i>trkA1</i>    | mmAC0754 | 227 | 19.8 | 3 | 5 | 1      | R | LIAEYLVR                       | A | 2 | 1039.5702 | 1039.5653 | -0.0049 | 0       | -4.71  | 2.584 | 0.405 | 626.1 | 1  | 13 | 14  | 2 | 0 | 1 |
| Q5V407_HALMA | 1 | Trk potassium uptake system protein          | <i>trkA1</i>    | mmAC0754 | 227 | 19.8 | 3 | 5 | 1      | R | LIAEYLVR                       | A | 2 | 1039.5702 | 1039.5703 | 0.0001  | 0       | 0.10   | 2.281 | 0.377 | 597.4 | 1  | 13 | 14  | 2 | 0 | 1 |
| Q5V407_HALMA | 1 | Trk potassium uptake system protein          | <i>trkA1</i>    | mmAC0754 | 227 | 19.8 | 3 | 5 | 1      | R | LIAEYLVR                       | A | 2 | 1039.5702 | 1039.5653 | -0.0049 | 0       | -4.71  | 2.543 | 0.299 | 610   | 1  | 13 | 14  | 2 | 0 | 1 |
| Q5V407_HALMA | 1 | Trk potassium uptake system protein          | <i>trkA1</i>    | mmAC0754 | 227 | 19.8 | 3 | 5 | 0.9976 | R | QIEGVNTMQNPQR                  | L | 2 | 1384.6881 | 1384.6930 | 0.0049  | 0       | 3.54   | 2.308 | 0.104 | 528.3 | 1  | 15 | 22  | 2 | 0 | 1 |
| Q5V442_HALMA | 1 | FAD/NAD binding oxidoreductase (EC 1.18.1.3) | <i>rmAC0717</i> | mmAC0717 | 232 | 29.7 | 4 | 5 | 0.9999 | K | LTVLGDVGEDISR                  | F | 2 | 1273.6514 | 1274.6454 | 0.9940  | -1.0034 | -7.34  | 3.066 | 0.356 | 979.2 | 1  | 17 | 22  | 2 | 0 | 1 |
| Q5V442_HALMA | 1 | FAD/NAD binding oxidoreductase (EC 1.18.1.3) | <i>rmAC0717</i> | mmAC0717 | 232 | 29.7 | 4 | 5 | 1      | R | AVVLGAGPGVGPVAVGIAER           | A | 2 | 1688.9573 | 1688.9622 | 0.0049  | 0       | 2.90   | 4.039 | 0.399 | 1425  | 1  | 27 | 36  | 2 | 0 | 1 |
| Q5V442_HALMA | 1 | FAD/NAD binding oxidoreductase (EC 1.18.1.3) | <i>rmAC0717</i> | mmAC0717 | 232 | 29.7 | 4 | 5 | 1      | R | AVVLGAGPGVGPVAVGIAER           | A | 2 | 1688.9573 | 1688.9597 | 0.0024  | 0       | 1.42   | 4.078 | 0.381 | 1363  | 1  | 27 | 36  | 2 | 0 | 1 |
| Q5V442_HALMA | 1 | FAD/NAD binding oxidoreductase (EC 1.18.1.3) | <i>rmAC0717</i> | mmAC0717 | 232 | 29.7 | 4 | 5 | 1      | R | DVGPDTVADIFETPEAFDAQPGQFVK     | L | 2 | 2792.3181 | 2792.3308 | 0.0127  | 0       | 4.55   | 5.043 | 0.605 | 1180  | 1  | 24 | 50  | 2 | 0 | 1 |
| Q5V442_HALMA | 1 | FAD/NAD binding oxidoreductase (EC 1.18.1.3) | <i>rmAC0717</i> | mmAC0717 | 232 | 29.7 | 4 | 5 | 0.9998 | G | MDEQVLDDVVAVR                  | D | 2 | 1372.7020 | 1372.7047 | 0.0027  | 0       | 1.97   | 3.844 | 0.395 | 2126  | 1  | 20 | 22  | 1 | 0 | 1 |
| Q5V4A6_HALMA | 1 | Acetyltransferase family                     | <i>rmAC0639</i> | mmAC0639 | 194 | 27.3 | 4 | 5 | 0.9990 | R | SRDYVVAIDEEESHEK               | A | 3 | 1775.8326 | 1776.7240 | 0.8914  | -1.0034 | -63.04 | 3.895 | 0.16  | 832.5 | 1  | 24 | 56  | 2 | 1 | 1 |
| Q5V4A6_HALMA | 1 | Acetyltransferase family                     | <i>rmAC0639</i> | mmAC0639 | 194 | 27.3 | 4 | 5 | 1      | K | NREEVVLDRIEEMGLDETAFR          | S | 4 | 2720.3228 | 2720.3240 | 0.0012  | 0       | 0.44   | 3.632 | 0.297 | 1084  | 1  | 38 | 126 | 2 | 2 | 1 |
| Q5V4M0_HALMA | 1 | 2-hydroxyhepta-24-diene-1,7-dioate isomerase | <i>hpcEa</i>    | mmAC0511 | 257 | 16   | 2 | 5 | 1      | R | NYADHAEEMDSLPDRPMLFLK          | A | 4 | 2636.1931 | 2636.1919 | -0.0012 | 0       | -0.46  | 4.542 | 0.399 | 672   | 1  | 41 | 126 | 2 | 0 | 1 |
| Q5V4M0_HALMA | 1 | 2-hydroxyhepta-24-diene-1,7-dioate isomerase | <i>hpcEa</i>    | mmAC0511 | 257 | 16   | 2 | 5 | 1      | R | NYADHAEEMDSLPDRPMLFLK          | A | 3 | 2620.1937 | 2620.2007 | 0.0070  | 0       | 2.67   | 5.792 | 0.437 | 1883  | 1  | 35 | 84  | 2 | 0 | 1 |
| Q5V4M0_HALMA | 1 | 2-hydroxyhepta-24-diene-1,7-dioate isomerase | <i>hpcEa</i>    | mmAC0511 | 257 | 16   | 2 | 5 | 1      | R | NYADHAEEMDSLPDRPMLFLK          | A | 3 | 2620.1937 | 2620.1956 | 0.0019  | 0       | 0.73   | 5.828 | 0.491 | 1987  | 1  | 35 | 84  | 2 | 0 | 1 |
| Q5V4M0_HALMA | 1 | 2-hydroxyhepta-24-diene-1,7-dioate isomerase | <i>hpcEa</i>    | mmAC0511 | 257 | 16   | 2 | 5 | 1      | R | NYADHAEEMDSLPDRPMLFLK          | A | 3 | 2620.1937 | 2620.2017 | 0.0080  | 0       | 3      |       |       |       |    |    |     |   |   |   |

|              |        |        |                                                                                                      |                 |          |     |      |   |   |        |   |                            |   |   |           |           |         |         |        |       |       |       |    |    |     |   |   |   |
|--------------|--------|--------|------------------------------------------------------------------------------------------------------|-----------------|----------|-----|------|---|---|--------|---|----------------------------|---|---|-----------|-----------|---------|---------|--------|-------|-------|-------|----|----|-----|---|---|---|
| TRPA_HALMAR  | Review | 1      | Tryptophan synthase alpha chain (EC 4.2.1.20)                                                        | <i>trpA</i>     | rmAC1884 | 293 | 9.6  | 2 | 5 | 0.9970 | R | LSDWDPVK                   | A | 2 | 958.4760  | 958.4854  | 0.0094  | 0       | 9.81   | 1.88  | 0.166 | 789.6 | 3  | 12 | 14  | 2 | 0 | 1 |
| Y1165_HALMAR | Review | 1      | UPF0212 protein rmAC1165                                                                             | <i>rmAC1165</i> | rmAC1165 | 157 | 24.8 | 2 | 5 | 1      | R | VVVEAAVPVYDVASADEAVR       | I | 2 | 2058.0633 | 2058.0686 | 0.0053  | 0       | 2.58   | 4.741 | 0.583 | 946.9 | 1  | 27 | 38  | 2 | 0 | 1 |
| Y1165_HALMAR | Review | 1      | UPF0212 protein rmAC1165                                                                             | <i>rmAC1165</i> | rmAC1165 | 157 | 24.8 | 2 | 5 | 1      | K | TGEMLNPNLNYVEINMGDR        | H | 2 | 2179.9878 | 2179.9981 | 0.0103  | 0       | 4.72   | 3.307 | 0.383 | 738.4 | 1  | 19 | 36  | 2 | 0 | 1 |
| Y1165_HALMAR | Review | 1      | UPF0212 protein rmAC1165                                                                             | <i>rmAC1165</i> | rmAC1165 | 157 | 24.8 | 2 | 5 | 1      | R | VVVEAAVPVYDVASADEAVR       | I | 2 | 2058.0633 | 2058.0696 | 0.0063  | 0       | 3.06   | 4.102 | 0.43  | 800.6 | 1  | 25 | 38  | 2 | 0 | 1 |
| Y1165_HALMAR | Review | 1      | UPF0212 protein rmAC1165                                                                             | <i>rmAC1165</i> | rmAC1165 | 157 | 24.8 | 2 | 5 | 1      | R | VVVEAAVPVYDVASADEAVR       | I | 2 | 2058.0633 | 2058.0684 | 0.0051  | 0       | 2.48   | 4.208 | 0.469 | 872.9 | 1  | 26 | 38  | 2 | 0 | 1 |
| Y1165_HALMAR | Review | 1      | UPF0212 protein rmAC1165                                                                             | <i>rmAC1165</i> | rmAC1165 | 157 | 24.8 | 2 | 5 | 1      | R | VVVEAAVPVYDVASADEAVR       | I | 2 | 2058.0633 | 2058.0557 | -0.0076 | 0       | -3.69  | 3.034 | 0.469 | 272.8 | 1  | 15 | 38  | 2 | 0 | 1 |
| Q5VOW6_HALMA | 0.9999 |        | Hypothetical protein                                                                                 | <i>rmAC1970</i> | rmAC1970 | 376 | 8.8  | 3 | 5 | 1      | R | YGLGVWVTGGLAADMFGAASK      | E | 2 | 1970.9560 | 1970.9602 | 0.0042  | 0       | 2.13   | 5.394 | 0.547 | 1746  | 1  | 27 | 38  | 2 | 0 | 1 |
| Q5VOW6_HALMA | 0.9999 |        | Hypothetical protein                                                                                 | <i>rmAC1970</i> | rmAC1970 | 376 | 8.8  | 3 | 5 | 0.9973 | R | AVIPAANGIGTAR              | D | 2 | 1209.6829 | 1210.6677 | 0.9848  | -1.0034 | -15.33 | 2.347 | 0.235 | 660.7 | 1  | 19 | 24  | 2 | 0 | 1 |
| Q5VOW6_HALMA | 0.9999 |        | Hypothetical protein                                                                                 | <i>rmAC1970</i> | rmAC1970 | 376 | 8.8  | 3 | 5 | 1      | R | YGLGVWVTGGLAADMFGAASK      | E | 2 | 1970.9560 | 1970.9608 | 0.0048  | 0       | 2.44   | 4.238 | 0.465 | 1386  | 1  | 23 | 38  | 2 | 0 | 1 |
| Q5VOW6_HALMA | 0.9999 |        | Hypothetical protein                                                                                 | <i>rmAC1970</i> | rmAC1970 | 376 | 8.8  | 3 | 5 | 1      | R | YGLGVWVTGGLAADMFGAASK      | E | 2 | 1970.9560 | 1970.9654 | 0.0094  | 0       | 4.77   | 4.487 | 0.502 | 1643  | 1  | 25 | 38  | 2 | 0 | 1 |
| Q5VSL2_HALMA | 0.9999 |        | Hypothetical protein                                                                                 | <i>rmAC0115</i> | rmAC0115 | 302 | 7.6  | 2 | 5 | 0.9933 | R | LYADLAQLVGNRR              | D | 2 | 1331.7197 | 1331.8854 | 0.1657  | 0       | 124.43 | 1.975 | 0.101 | 496.6 | 1  | 13 | 22  | 2 | 0 | 1 |
| Q5VSL2_HALMA | 0.9999 |        | Hypothetical protein                                                                                 | <i>rmAC0115</i> | rmAC0115 | 302 | 7.6  | 2 | 5 | 1      | R | REVDLQTLQSR                | L | 2 | 1343.7157 | 1343.7194 | 0.0037  | 0       | 2.75   | 3.391 | 0.192 | 1136  | 1  | 17 | 20  | 2 | 0 | 1 |
| Q5VSL2_HALMA | 0.9999 |        | Hypothetical protein                                                                                 | <i>rmAC0115</i> | rmAC0115 | 302 | 7.6  | 2 | 5 | 1      | R | REVDLQTLQSR                | L | 2 | 1343.7157 | 1343.7166 | 0.0009  | 0       | 0.67   | 3.708 | 0.191 | 777.1 | 1  | 16 | 20  | 2 | 0 | 1 |
| Q5VSL2_HALMA | 0.9999 |        | Hypothetical protein                                                                                 | <i>rmAC0115</i> | rmAC0115 | 302 | 7.6  | 2 | 5 | 1      | R | REVDLQTLQSR                | L | 2 | 1343.7157 | 1343.7168 | 0.0011  | 0       | 0.82   | 3.571 | 0.27  | 1285  | 1  | 18 | 20  | 2 | 0 | 1 |
| Q5VSL2_HALMA | 0.9999 |        | Hypothetical protein                                                                                 | <i>rmAC0115</i> | rmAC0115 | 302 | 7.6  | 2 | 5 | 1      | R | REVDLQTLQSR                | L | 2 | 1343.7157 | 1343.7162 | 0.0005  | 0       | 0.37   | 3.364 | 0.248 | 1245  | 1  | 18 | 20  | 2 | 0 | 1 |
| CDC6B_HALMAR | Review | 0.9998 | Cell division control protein 6 homolog 11 (CDC6 homolog 11)                                         | <i>cdc6-11</i>  | pNG6174  | 422 | 5    | 2 | 5 | 0.9857 | K | LLLFALTR                   | L | 2 | 945.6011  | 946.6054  | 1.0043  | -1.0034 | 1.00   | 1.814 | 0.277 | 447.9 | 26 | 10 | 14  | 2 | 0 | 1 |
| CDC6B_HALMAR | Review | 0.9998 | Cell division control protein 6 homolog 11 (CDC6 homolog 11)                                         | <i>cdc6-11</i>  | pNG6174  | 422 | 5    | 2 | 5 | 0.9914 | K | LLLFALTR                   | L | 2 | 945.6011  | 946.6015  | 1.0004  | -1.0034 | -3.12  | 1.888 | 0.203 | 883.7 | 1  | 13 | 14  | 2 | 0 | 1 |
| CDC6B_HALMAR | Review | 0.9998 | Cell division control protein 6 homolog 11 (CDC6 homolog 11)                                         | <i>cdc6-11</i>  | pNG6174  | 422 | 5    | 2 | 5 | 1      | R | TSEIHEVYQTVAR              | D | 3 | 1531.7630 | 1531.7782 | 0.0152  | 0       | 9.92   | 3.808 | 0.283 | 1270  | 1  | 25 | 48  | 2 | 0 | 1 |
| CDC6B_HALMAR | Review | 0.9998 | Cell division control protein 6 homolog 11 (CDC6 homolog 11)                                         | <i>cdc6-11</i>  | pNG6174  | 422 | 5    | 2 | 5 | 0.9999 | R | TSEIHEVYQTVAR              | D | 3 | 1531.7630 | 1531.7650 | 0.0020  | 0       | 1.31   | 3.207 | 0.219 | 827.1 | 2  | 24 | 48  | 2 | 0 | 1 |
| CDC6B_HALMAR | Review | 0.9998 | Cell division control protein 6 homolog 11 (CDC6 homolog 11)                                         | <i>cdc6-11</i>  | pNG6174  | 422 | 5    | 2 | 5 | 0.9997 | R | TSEIHEVYQTVAR              | D | 3 | 1531.7630 | 1531.7782 | 0.0152  | 0       | 9.92   | 3.319 | 0.208 | 537.3 | 14 | 21 | 48  | 2 | 0 | 1 |
| Q5VOD1_HALMA | 0.9998 |        | 6-phosphogluconate dehydrogenase (EC 1.1.1.44)                                                       | <i>gnd</i>      | rmAC2180 | 299 | 7.4  | 2 | 5 | 0.9904 | R | YGFGRHEVPRRE               | - | 3 | 1501.7538 | 1501.7541 | 0.0003  | 0       | 0.20   | 1.798 | 0.191 | 548.8 | 3  | 20 | 44  | 2 | 2 | 1 |
| Q5VOD1_HALMA | 0.9998 |        | 6-phosphogluconate dehydrogenase (EC 1.1.1.44)                                                       | <i>gnd</i>      | rmAC2180 | 299 | 7.4  | 2 | 5 | 1      | - | MELGVILGGR                 | M | 2 | 1043.5797 | 1043.5803 | 0.0006  | 0       | 0.57   | 3.321 | 0.314 | 1419  | 1  | 17 | 18  | 2 | 0 | 1 |
| Q5VOD1_HALMA | 0.9998 |        | 6-phosphogluconate dehydrogenase (EC 1.1.1.44)                                                       | <i>gnd</i>      | rmAC2180 | 299 | 7.4  | 2 | 5 | 1      | - | MELGVILGGR                 | M | 2 | 1043.5797 | 1043.5784 | -0.0013 | 0       | -1.25  | 2.966 | 0.314 | 1447  | 1  | 17 | 18  | 2 | 0 | 1 |
| Q5VOD1_HALMA | 0.9998 |        | 6-phosphogluconate dehydrogenase (EC 1.1.1.44)                                                       | <i>gnd</i>      | rmAC2180 | 299 | 7.4  | 2 | 5 | 1      | - | MELGVILGGR                 | M | 2 | 1043.5797 | 1043.5827 | 0.0030  | 0       | 2.87   | 3.336 | 0.304 | 1423  | 1  | 17 | 18  | 2 | 0 | 1 |
| Q5VOD1_HALMA | 0.9998 |        | 6-phosphogluconate dehydrogenase (EC 1.1.1.44)                                                       | <i>gnd</i>      | rmAC2180 | 299 | 7.4  | 2 | 5 | 1      | - | MELGVILGGR                 | M | 2 | 1043.5797 | 1043.5817 | 0.0020  | 0       | 1.92   | 3.322 | 0.322 | 1458  | 1  | 17 | 18  | 2 | 0 | 1 |
| ATGT_HALMAR  | Review | 0.9994 | 7-cyano-7-deazaguanine tRNA-ribosyltransferase (EC 2.4.2.-) (Archaeal tRNA-guanine transglycosylase) | <i>tgtA</i>     | rmAC3258 | 490 | 4.7  | 2 | 5 | 0.9902 | R | HNLHVTYGEIR                | T | 3 | 1337.6840 | 1339.7482 | 2.0642  | -2.0067 | 42.98  | 2.826 | 0.158 | 951.7 | 16 | 20 | 40  | 2 | 0 | 1 |
| ATGT_HALMAR  | Review | 0.9994 | 7-cyano-7-deazaguanine tRNA-ribosyltransferase (EC 2.4.2.-) (Archaeal tRNA-guanine transglycosylase) | <i>tgtA</i>     | rmAC3258 | 490 | 4.7  | 2 | 5 | 0.9572 | R | ARGHPEMLDGYR               | A | 3 | 1400.6619 | 1402.6881 | 2.0262  | -2.0067 | 13.92  | 2.435 | 0.123 | 586.1 | 4  | 20 | 44  | 2 | 1 | 1 |
| ATGT_HALMAR  | Review | 0.9994 | 7-cyano-7-deazaguanine tRNA-ribosyltransferase (EC 2.4.2.-) (Archaeal tRNA-guanine transglycosylase) | <i>tgtA</i>     | rmAC3258 | 490 | 4.7  | 2 | 5 | 1      | R | HNLHVTYGEIR                | T | 3 | 1337.6840 | 1337.6781 | -0.0059 | 0       | -4.41  | 2.889 | 0.361 | 1498  | 1  | 23 | 40  | 2 | 0 | 1 |
| ATGT_HALMAR  | Review | 0.9994 | 7-cyano-7-deazaguanine tRNA-ribosyltransferase (EC 2.4.2.-) (Archaeal tRNA-guanine transglycosylase) | <i>tgtA</i>     | rmAC3258 | 490 | 4.7  | 2 | 5 | 1      | R | HNLHVTYGEIR                | T | 3 | 1337.6840 | 1339.7482 | 2.0642  | -2.0067 | 42.98  | 3.623 | 0.34  | 2255  | 1  | 27 | 40  | 2 | 0 | 1 |
| ATGT_HALMAR  | Review | 0.9994 | 7-cyano-7-deazaguanine tRNA-ribosyltransferase (EC 2.4.2.-) (Archaeal tRNA-guanine transglycosylase) | <i>tgtA</i>     | rmAC3258 | 490 | 4.7  | 2 | 5 | 0.9918 | R | HNLHVTYGEIR                | T | 3 | 1337.6840 | 1339.7450 | 2.0610  | -2.0067 | 40.59  | 2.418 | 0.178 | 711.6 | 3  | 21 | 40  | 2 | 0 | 1 |
| Q5UWC2_HALMA | 0.9988 |        | Cyclopropane-fatty-acyl-phospholipid synthase (EC 2.1.1.79)                                          | <i>fapS</i>     | rmB0259  | 240 | 8.3  | 2 | 5 | 0.9949 | R | LFHAIPAMAAR                | L | 3 | 1196.6488 | 1197.6682 | 1.0194  | -1.0034 | 13.41  | 2.754 | 0.138 | 1028  | 1  | 20 | 40  | 2 | 0 | 1 |
| Q5UWC2_HALMA | 0.9988 |        | Cyclopropane-fatty-acyl-phospholipid synthase (EC 2.1.1.79)                                          | <i>fapS</i>     | rmB0259  | 240 | 8.3  | 2 | 5 | 0.9879 | R | FSTTAENIR                  | L | 2 | 1037.5141 | 1037.5158 | 0.0017  | 0       | 1.64   | 1.873 | 0.059 | 587.1 | 1  | 14 | 16  | 2 | 0 | 1 |
| Q5UWC2_HALMA | 0.9988 |        | Cyclopropane-fatty-acyl-phospholipid synthase (EC 2.1.1.79)                                          | <i>fapS</i>     | rmB0259  | 240 | 8.3  | 2 | 5 | 0.9861 | R | FSTTAENIR                  | L | 2 | 1037.5141 | 1038.5254 | 1.0113  | -1.0034 | 7.66   | 2.419 | 0.075 | 649.1 | 1  | 14 | 16  | 2 | 0 | 1 |
| Q5UWC2_HALMA | 0.9988 |        | Cyclopropane-fatty-acyl-phospholipid synthase (EC 2.1.1.79)                                          | <i>fapS</i>     | rmB0259  | 240 | 8.3  | 2 | 5 | 0.9950 | R | LFHAIPAMAAR                | L | 3 | 1196.6488 | 1197.6682 | 1.0194  | -1.0034 | 13.41  | 2.627 | 0.181 | 811.1 | 5  | 19 | 40  | 2 | 0 | 1 |
| Q5UWC2_HALMA | 0.9988 |        | Cyclopropane-fatty-acyl-phospholipid synthase (EC 2.1.1.79)                                          | <i>fapS</i>     | rmB0259  | 240 | 8.3  | 2 | 5 | 0.9919 | R | LFHAIPAMAAR                | L | 3 | 1196.6488 | 1197.6382 | 0.9894  | -1.0034 | -11.66 | 2.394 | 0.197 | 707   | 10 | 18 | 40  | 2 | 0 | 1 |
| Q5V0U6_HALMA | 0.9983 |        | Hypothetical protein                                                                                 | <i>rmAC1994</i> | rmAC1994 | 111 | 24.3 | 1 | 5 | 1      | K | LATEDEGSTLSVSLDDLEQLLDTVVR | M | 2 | 2930.4972 | 2931.5318 | 1.0346  | -1.0034 | 10.66  | 4.07  | 0.507 | 862.3 | 1  | 21 | 52  | 2 | 0 | 1 |
| Q5V0U6_HALMA | 0.9983 |        | Hypothetical protein                                                                                 | <i>rmAC1994</i> | rmAC1994 | 111 | 24.3 | 1 | 5 | 1      | K | LATEDEGSTLSVSLDDLEQLLDTVVR | M | 2 | 2930.4972 | 2931.5154 | 1.0182  | -1.0034 | 5.07   | 3.471 | 0.468 | 512.4 | 1  | 18 | 52  | 2 | 0 | 1 |
| Q5V0U6_HALMA | 0.9983 |        | Hypothetical protein                                                                                 | <i>rmAC1994</i> | rmAC1994 | 111 | 24.3 | 1 | 5 | 1      | K | LATEDEGSTLSVSLDDLEQLLDTVVR | M | 2 | 2930.4972 | 2930.5071 | 0.0099  | 0       | 3.38   | 4.007 | 0.446 | 903.6 | 1  | 22 | 52  | 2 | 0 | 1 |
| Q5V61_HALMA  | 0.9857 |        | N-methylhydantoinase B (EC 3.5.2.9)                                                                  | <i>hyuB</i>     | pNG7165  | 542 | 4.4  | 1 | 5 | 1      | R | IGELLEEHGPTLLDAFNAVIEYSR   | E | 3 | 2685.3650 | 2685.3635 | -0.0015 | 0       | -0.56  | 5.261 | 0.462 | 2602  | 1  | 36 | 92  | 2 | 0 | 1 |
| Q5V61_HALMA  | 0.9857 |        | N-methylhydantoinase B (EC 3.5.2.9)                                                                  | <i>hyuB</i>     | pNG7165  | 542 | 4.4  | 1 | 5 | 1      | R | IGELLEEHGPTLLDAFNAVIEYSR   | E | 3 | 2685.3650 | 2685.3631 | -0.0019 | 0       | -0.71  | 5.404 | 0.486 | 2758  | 1  | 38 | 92  | 2 | 0 | 1 |
| Q5V61_HALMA  | 0.9857 |        | N-methylhydantoinase B (EC 3.5.2.9)                                                                  | <i>hyuB</i>     | pNG7165  | 542 | 4.4  | 1 | 5 | 1      | R | IGELLEEHGPTLLDAFNAVIEYSR   | E | 3 | 2685.3650 | 2685.3679 | 0.0029  | 0       | 1.08   | 4.999 | 0.422 | 2211  | 1  | 34 | 92  | 2 | 0 | 1 |
| Q5V61_HALMA  | 0.9857 |        | N-methylhydantoinase B (EC 3.5.2.9)                                                                  | <i>hyuB</i>     | pNG7165  | 542 | 4.4  | 1 | 5 | 1      | R | IGELLEEHGPTLLDAFNAVIEYSR   | E | 3 | 2685.3650 | 2685.3540 | -0.0110 | 0       | -4.10  | 5.372 | 0.473 | 1865  | 1  | 34 | 92  | 2 | 0 | 1 |
| COBB_HALMAR  | Review | 1      | Probable cobyrinic acid A,C-diamide synthase                                                         | <i>cobB</i>     | rmAC1102 | 439 | 18   | 4 | 4 | 0.9994 | K | TVATLATLTALEDAGYQPQPAK     | A | 2 | 2258.1794 | 2258.1968 | 0.0174  | 0       | 7.71   | 2.457 | 0.192 | 423.9 | 1  | 16 | 42  | 2 | 0 | 1 |
| COBB_HALMAR  | Review | 1      | Probable cobyrinic acid A,C-diamide synthase                                                         | <i>cobB</i>     | rmAC1102 | 439 | 18   | 4 | 4 | 0.9995 | K | AGMSEVAATALGFAQYADR        | I | 3 | 1927.9098 | 1927.9069 | -0.0029 | 0       | -1.50  | 3.508 | 0.157 | 1165  | 1  | 30 | 72  | 2 | 0 | 1 |
| HIS2_HALMAR  | Review | 1      | Phosphoribosyl-ATP pyrophosphatase (EC 3.6.1.31) (PRA-PH)                                            | <i>hisE</i>     | rmAC2371 | 98  | 44.9 | 3 | 4 | 1      | R | KANLPEDSYTASLFTHEKGENAVLEK | L | 4 | 2890.4348 | 2890.4568 | 0.0220  | 0       | 7.61   | 4.907 | 0.338 | 1523  | 1  | 45 | 150 | 2 | 1 | 1 |
| HIS2_HALMAR  | Review | 1      | Phosphoribosyl-ATP pyrophosphatase (EC 3.6.1.31) (PRA-PH)                                            | <i>hisE</i>     | rmAC2371 | 98  | 44.9 | 3 | 4 | 0.9991 | M | SDDTGDVIDELFAVIEDR         | K | 3 | 2007.9273 | 2007.9301 | 0.0028  | 0       | 1.39   | 3.848 | 0.331 | 1745  | 1  | 31 | 68  | 2 | 0 | 1 |
| HIS2_HALMAR  | Review | 1      | Phosphoribosyl-ATP pyrophosphatase (EC 3.6.1.31) (PRA-PH)                                            | <i>hisE</i>     | rmAC2371 | 98  | 44.9 | 3 | 4 | 1      | M | SDDTGDVIDELFAVIEDRK        | A | 3 | 2136.0222 | 2136.0298 |         |         |        |       |       |       |    |    |     |   |   |   |

|              |   |                                             |                 |           |     |      |   |   |        |   |                                           |           |           |           |           |         |         |         |       |       |       |     |    |     |   |   |   |
|--------------|---|---------------------------------------------|-----------------|-----------|-----|------|---|---|--------|---|-------------------------------------------|-----------|-----------|-----------|-----------|---------|---------|---------|-------|-------|-------|-----|----|-----|---|---|---|
| Q5UYB0_HALMA | 1 | Protoporphyrin IX magnesium chelatase       | <i>hmcA</i>     | mmAC23018 | 719 | 5.6  | 2 | 4 | 1      | R | TAVGDSGAPVDVDPASVDTDGGASASGR              | A         | 2         | 2360.0364 | 2362.0454 | 2.0090  | -2.0067 | 0.97    | 4.482 | 0.463 | 979.8 | 1   | 24 | 50  | 2 | 0 | 1 |
| Q5UYG0_HALMA | 1 | Hypothetical protein                        | <i>rmAC2960</i> | mmAC2960  | 125 | 23.2 | 2 | 4 | 1      | R | LNWLVLVLSLVGR                             | S         | 2         | 1268.7605 | 1268.7654 | 0.0049  | 0       | 3.86    | 2.929 | 0.278 | 1670  | 1   | 17 | 20  | 2 | 0 | 1 |
| Q5UYG0_HALMA | 1 | Hypothetical protein                        | <i>rmAC2960</i> | mmAC2960  | 125 | 23.2 | 2 | 4 | 1      | R | LNWLVLVLSLVGR                             | S         | 2         | 1268.7605 | 1268.7696 | 0.0091  | 0       | 7.17    | 3.154 | 0.348 | 1872  | 1   | 17 | 20  | 2 | 0 | 1 |
| Q5UYG0_HALMA | 1 | Hypothetical protein                        | <i>rmAC2960</i> | mmAC2960  | 125 | 23.2 | 2 | 4 | 0.9999 | R | SEHLANADELAETGDYDR                        | S         | 2         | 2004.8661 | 2006.9054 | 2.0393  | -2.0067 | 16.26   | 3.573 | 0.325 | 1249  | 1   | 20 | 34  | 2 | 0 | 1 |
| Q5UYG0_HALMA | 1 | Hypothetical protein                        | <i>rmAC2960</i> | mmAC2960  | 125 | 23.2 | 2 | 4 | 0.9999 | R | SEHLANADELAETGDYDR                        | S         | 3         | 2004.8661 | 2004.8662 | 0.0001  | 0       | 0.05    | 4.106 | 0.212 | 1119  | 1   | 27 | 68  | 2 | 0 | 1 |
| Q5UYQ5_HALMA | 1 | Holliday junction resolvase                 | <i>hjr</i>      | mmAC2847  | 172 | 22.7 | 2 | 4 | 0.9998 | R | ERELVNALDEAGFAVMR                         | A         | 3         | 1918.9571 | 1918.9616 | 0.0045  | 0       | 2.35    | 2.829 | 0.257 | 939.7 | 1   | 27 | 64  | 2 | 1 | 1 |
| Q5UYQ5_HALMA | 1 | Holliday junction resolvase                 | <i>hjr</i>      | mmAC2847  | 172 | 22.7 | 2 | 4 | 1      | K | SSAGDPHYLTGEEVEALLFFAR                    | N         | 2         | 2384.1900 | 2384.2029 | 0.0129  | 0       | 5.41    | 4.433 | 0.456 | 1824  | 1   | 24 | 42  | 2 | 0 | 1 |
| Q5UYQ5_HALMA | 1 | Holliday junction resolvase                 | <i>hjr</i>      | mmAC2847  | 172 | 22.7 | 2 | 4 | 1      | K | SSAGDPHYLTGEEVEALLFFAR                    | N         | 2         | 2384.1900 | 2384.2010 | 0.0110  | 0       | 4.61    | 4.656 | 0.525 | 1547  | 1   | 24 | 42  | 2 | 0 | 1 |
| Q5UYQ5_HALMA | 1 | Holliday junction resolvase                 | <i>hjr</i>      | mmAC2847  | 172 | 22.7 | 2 | 4 | 0.9999 | K | SSAGDPHYLTGEEVEALLFFAR                    | N         | 3         | 2384.1900 | 2385.2012 | 1.0112  | -1.0034 | 3.29    | 3.548 | 0.316 | 878   | 1   | 29 | 84  | 2 | 0 | 1 |
| Q5UYU0_HALMA | 1 | Hypothetical protein                        | <i>rmAC2807</i> | mmAC2807  | 236 | 9.7  | 2 | 4 | 0.9987 | - | MLDDAFGQMVLDFHR                           | G         | 3         | 1809.8223 | 1809.8224 | 0.0001  | 0       | 0.06    | 2.589 | 0.264 | 376.9 | 188 | 20 | 56  | 2 | 0 | 1 |
| Q5UYU0_HALMA | 1 | Hypothetical protein                        | <i>rmAC2807</i> | mmAC2807  | 236 | 9.7  | 2 | 4 | 1      | - | MLDDAFGQMVLDFHR                           | G         | 3         | 1793.8229 | 1793.8262 | 0.0033  | 0       | 1.84    | 2.985 | 0.328 | 610.4 | 1   | 29 | 56  | 2 | 0 | 1 |
| Q5UYU0_HALMA | 1 | Hypothetical protein                        | <i>rmAC2807</i> | mmAC2807  | 236 | 9.7  | 2 | 4 | 0.9951 | - | MLDDAFGQMVLDFHRGDLAERPR                   | Y         | 5         | 2688.2900 | 2688.2888 | -0.0012 | 0       | -0.45   | 2.668 | 0.061 | 1160  | 2   | 45 | 176 | 2 | 1 | 1 |
| Q5UYU7_HALMA | 1 | Flavoprotein                                | <i>fprA</i>     | mmAC2800  | 232 | 20.7 | 3 | 4 | 1      | R | LDTVLDAFDAPLYAYGSHPR                      | R         | 3         | 2220.0851 | 2220.0979 | 0.0128  | 0       | 5.77    | 3.168 | 0.324 | 1280  | 1   | 34 | 76  | 2 | 0 | 1 |
| Q5UYU7_HALMA | 1 | Flavoprotein                                | <i>fprA</i>     | mmAC2800  | 232 | 20.7 | 3 | 4 | 0.9999 | R | EHADALDAVVLTHQHGHDVQR                     | L         | 4         | 2347.1417 | 2347.1438 | 0.0021  | 0       | 0.89    | 2.917 | 0.23  | 1623  | 1   | 41 | 120 | 2 | 0 | 1 |
| Q5UYX1_HALMA | 1 | Hypothetical protein                        | <i>rmAC2772</i> | mmAC2772  | 538 | 8.7  | 2 | 4 | 0.9984 | R | IEFRPLAAQPTVDDAIGFAAVFAGLMESLPR           | L         | 3         | 3301.7169 | 3301.7205 | 0.0036  | 0       | 1.09    | 3.074 | 0.204 | 346.3 | 19  | 23 | 120 | 2 | 0 | 1 |
| Q5UYX1_HALMA | 1 | Hypothetical protein                        | <i>rmAC2772</i> | mmAC2772  | 538 | 8.7  | 2 | 4 | 0.9999 | R | HQEGNLLGGSFVDWFE                          | -         | 2         | 1905.8533 | 1905.8527 | -0.0006 | 0       | -0.31   | 2.627 | 0.288 | 732.5 | 1   | 15 | 30  | 2 | 0 | 1 |
| Q5UYX1_HALMA | 1 | Hypothetical protein                        | <i>rmAC2772</i> | mmAC2772  | 538 | 8.7  | 2 | 4 | 0.9998 | R | IEFRPLAAQPTVDDAIGFAAVFAGLMESLPR           | L         | 3         | 3301.7169 | 3301.7486 | 0.0317  | 0       | 9.60    | 3.611 | 0.232 | 433.2 | 4   | 26 | 120 | 2 | 0 | 1 |
| Q5UYX1_HALMA | 1 | Hypothetical protein                        | <i>rmAC2772</i> | mmAC2772  | 538 | 8.7  | 2 | 4 | 0.9502 | R | IEFRPLAAQPTVDDAIGFAAVFAGLMESLPR           | L         | 3         | 3301.7169 | 3302.7383 | 1.0214  | -1.0034 | 5.47    | 3.122 | 0.118 | 355.1 | 35  | 23 | 120 | 2 | 0 | 1 |
| Q5UYX3_HALMA | 1 | Hypothetical protein                        | <i>rmAC2757</i> | mmAC2757  | 729 | 11.9 | 3 | 4 | 1      | K | ATDTSEHAASQGVDTADETAAATDTSDDLAPSDDSTASSMA | S         | 3         | 4387.8113 | 4389.8482 | 2.0369  | -2.0067 | 6.88    | 6.577 | 0.603 | 1351  | 1   | 50 | 172 | 2 | 0 | 1 |
| Q5UYX3_HALMA | 1 | Hypothetical protein                        | <i>rmAC2757</i> | mmAC2757  | 729 | 11.9 | 3 | 4 | 1      | R | FGSYLGELLVR                               | A         | 2         | 1252.6815 | 1252.6801 | -0.0014 | 0       | -1.12   | 2.708 | 0.395 | 898.5 | 1   | 16 | 20  | 2 | 0 | 1 |
| Q5UYX3_HALMA | 1 | Hypothetical protein                        | <i>rmAC2757</i> | mmAC2757  | 729 | 11.9 | 3 | 4 | 0.9968 | R | FGSYLGELLVR                               | A         | 2         | 1252.6815 | 1251.7454 | -0.9361 | 1       | 35.04   | 2.274 | 0.41  | 718.9 | 1   | 16 | 20  | 2 | 0 | 1 |
| Q5UYX3_HALMA | 1 | Hypothetical protein                        | <i>rmAC2757</i> | mmAC2757  | 729 | 11.9 | 3 | 4 | 1      | R | VGDAQADERGEAPAGDTTDSEPSQAVETEPR           | I         | 3         | 3285.4505 | 3287.4981 | 2.0476  | -2.0067 | 12.45   | 4.363 | 0.432 | 984.8 | 1   | 34 | 124 | 2 | 1 | 1 |
| Q5UZY0_HALMA | 1 | Transcription regulator                     | <i>rmAC2354</i> | mmAC2354  | 350 | 16   | 5 | 4 | 1      | R | AVQADDTTTTIEGTVVEVK                       | Q         | 2         | 1991.9535 | 1991.9596 | 0.0061  | 0       | 3.06    | 5.707 | 0.417 | 2475  | 1   | 27 | 36  | 2 | 0 | 1 |
| Q5UZY0_HALMA | 1 | Transcription regulator                     | <i>rmAC2354</i> | mmAC2354  | 350 | 16   | 5 | 4 | 0.9831 | R | ARPPPEVIDALTDRLLEEMSGALDSR                | Y         | 4         | 2769.3603 | 2770.3650 | 1.0047  | -1.0034 | 0.49    | 3.129 | 0.097 | 1075  | 2   | 39 | 144 | 2 | 1 | 1 |
| Q5UZY0_HALMA | 1 | Transcription regulator                     | <i>rmAC2354</i> | mmAC2354  | 350 | 16   | 5 | 4 | 0.9999 | K | RLTEYIR                                   | N         | 2         | 949.5345  | 949.5454  | 0.0109  | 0       | 11.48   | 2.647 | 0.17  | 839.4 | 1   | 12 | 12  | 2 | 0 | 1 |
| Q5V073_HALMA | 1 | Hypothetical protein                        | <i>rmAC2249</i> | mmAC2249  | 205 | 9.8  | 3 | 4 | 0.9837 | L | 3                                         | 1625.8348 | 1625.8357 | 0.0009    | 0         | 0.55    | 2.428   | 0.07    | 985.8 | 1     | 23    | 48  | 2  | 1   | 1 |   |   |
| Q5V073_HALMA | 1 | Hypothetical protein                        | <i>rmAC2249</i> | mmAC2249  | 205 | 9.8  | 3 | 4 | 0.9254 | R | MSLRDLAEFFNK                              | R         | 3         | 1469.7337 | 1470.7359 | 1.0022  | -1.0034 | -0.78   | 2.349 | 0.101 | 573.1 | 5   | 19 | 44  | 2 | 1 | 1 |
| Q5V073_HALMA | 1 | Hypothetical protein                        | <i>rmAC2249</i> | mmAC2249  | 205 | 9.8  | 3 | 4 | 1      | R | MSLRDLAEFFNK                              | L         | 3         | 1625.8348 | 1626.8480 | 1.0132  | -1.0034 | 6.06    | 3.808 | 0.343 | 2117  | 1   | 27 | 48  | 2 | 1 | 1 |
| Q5V073_HALMA | 1 | Hypothetical protein                        | <i>rmAC2249</i> | mmAC2249  | 205 | 9.8  | 3 | 4 | 0.9877 | R | SYLKEWR                                   | G         | 2         | 980.5079  | 980.5055  | -0.0024 | 0       | -2.45   | 2.005 | 0.188 | 549.7 | 11  | 9  | 12  | 2 | 1 | 1 |
| Q5V080_HALMA | 1 | Hypothetical protein                        | <i>rmAC2242</i> | mmAC2242  | 94  | 37.2 | 1 | 4 | 1      | R | KNPDHVELQLEMDNTDLDAVKPHADSVTLAAQAR        | E         | 4         | 3827.8748 | 3829.8909 | 2.0161  | -2.0067 | 2.46    | 7.335 | 0.508 | 3738  | 1   | 59 | 204 | 2 | 0 | 1 |
| Q5V080_HALMA | 1 | Hypothetical protein                        | <i>rmAC2242</i> | mmAC2242  | 94  | 37.2 | 1 | 4 | 1      | R | KNPDHVELQLEMDNTDLDAVKPHADSVTLAAQAR        | E         | 5         | 3827.8748 | 3827.8797 | 0.0049  | 0       | 1.28    | 6.281 | 0.425 | 3187  | 1   | 67 | 272 | 2 | 0 | 1 |
| Q5V080_HALMA | 1 | Hypothetical protein                        | <i>rmAC2242</i> | mmAC2242  | 94  | 37.2 | 1 | 4 | 1      | R | KNPDHVELQLEMDNTDLDAVKPHADSVTLAAQAR        | E         | 5         | 3827.8748 | 3829.9136 | 2.0388  | -2.0067 | 8.39    | 7.025 | 0.387 | 3042  | 1   | 67 | 272 | 2 | 0 | 1 |
| Q5V080_HALMA | 1 | Hypothetical protein                        | <i>rmAC2242</i> | mmAC2242  | 94  | 37.2 | 1 | 4 | 1      | R | KNPDHVELQLEMDNTDLDAVKPHADSVTLAAQAR        | E         | 5         | 3827.8748 | 3827.8802 | 0.0054  | 0       | 1.41    | 6.164 | 0.403 | 3041  | 1   | 66 | 272 | 2 | 0 | 1 |
| Q5V0A2_HALMA | 1 | RecJ-like exonuclease                       | <i>recJ4</i>    | mmAC2217  | 363 | 16.5 | 3 | 4 | 0.9998 | R | RLPEEEEEGVDTDR                            | -         | 3         | 1672.7540 | 1672.7514 | -0.0026 | 0       | -1.55   | 3.391 | 0.199 | 969   | 2   | 25 | 52  | 2 | 0 | 1 |
| Q5V0A2_HALMA | 1 | RecJ-like exonuclease                       | <i>recJ4</i>    | mmAC2217  | 363 | 16.5 | 3 | 4 | 0.9609 | K | QAIVDAFR                                  | R         | 2         | 918.4923  | 918.5055  | 0.0132  | 0       | 14.37   | 1.526 | 0.105 | 251.1 | 5   | 11 | 14  | 2 | 0 | 1 |
| Q5V0A2_HALMA | 1 | RecJ-like exonuclease                       | <i>recJ4</i>    | mmAC2217  | 363 | 16.5 | 3 | 4 | 0.9999 | R | SDDLADLSYWSEPEEYIEAVRDHGPDLSPFHEFLDEK     | R         | 5         | 4478.9979 | 4480.0244 | 1.0265  | -1.0034 | 5.17    | 4.743 | 0.253 | 1798  | 1   | 61 | 296 | 2 | 1 | 1 |
| Q5V0A2_HALMA | 1 | RecJ-like exonuclease                       | <i>recJ4</i>    | mmAC2217  | 363 | 16.5 | 3 | 4 | 0.9954 | R | SDDLADLSYWSEPEEYIEAVRDHGPDLSPFHEFLDEK     | R         | 4         | 4478.9979 | 4481.0108 | 2.0129  | -2.0067 | 1.38    | 3.118 | 0.131 | 924.6 | 1   | 44 | 222 | 2 | 1 | 1 |
| Q5V0J0_HALMA | 1 | Hypothetical protein                        | <i>rmAC2112</i> | mmAC2112  | 124 | 41.9 | 2 | 4 | 1      | R | DAGVEQATIEAASDAVVEATDDAAGELEAFFDGR        | E         | 2         | 3439.5539 | 3439.5979 | 0.0440  | 0       | 12.79   | 2.383 | 0.421 | 345   | 1   | 16 | 66  | 2 | 0 | 1 |
| Q5V0J0_HALMA | 1 | Hypothetical protein                        | <i>rmAC2112</i> | mmAC2112  | 124 | 41.9 | 2 | 4 | 0.9921 | R | DAGVEQATIEAASDAVVEATDDAAGELEAFFDGR        | E         | 4         | 3439.5539 | 3439.5569 | 0.0030  | 0       | 0.87    | 3.435 | 0.035 | 1276  | 1   | 43 | 198 | 2 | 0 | 1 |
| Q5V0J0_HALMA | 1 | Hypothetical protein                        | <i>rmAC2112</i> | mmAC2112  | 124 | 41.9 | 2 | 4 | 0.9888 | R | DAGVEQATIEAASDAVVEATDDAAGELEAFFDGR        | E         | 4         | 3439.5539 | 3440.5613 | 1.0074  | -1.0034 | 1.18    | 3.111 | 0.09  | 1003  | 1   | 42 | 198 | 2 | 0 | 1 |
| Q5V0J0_HALMA | 1 | Hypothetical protein                        | <i>rmAC2112</i> | mmAC2112  | 124 | 41.9 | 2 | 4 | 0.9190 | R | ILSEEKVELSLGPTVHGR                        | V         | 4         | 1963.0738 | 1963.0741 | 0.0003  | 0       | 0.15    | 2.124 | 0.157 | 242.1 | 342 | 26 | 102 | 2 | 1 | 1 |
| Q5V0S3_HALMA | 1 | Hypothetical protein                        | <i>rmAC2021</i> | mmAC2021  | 158 | 29.7 | 2 | 4 | 1      | R | TLGTEHFAANYFELEPGDSFSGSLHR                | H         | 3         | 2881.3307 | 2881.3355 | 0.0048  | 0       | 1.67    | 5.465 | 0.373 | 1425  | 1   | 39 | 100 | 2 | 0 | 1 |
| Q5V0S3_HALMA | 1 | Hypothetical protein                        | <i>rmAC2021</i> | mmAC2021  | 158 | 29.7 | 2 | 4 | 1      | R | VIGWAFGAPGATHDWDIAIESR                    | A         | 2         | 2255.0759 | 2255.0862 | 0.0103  | 0       | 4.57    | 3.788 | 0.438 | 667   | 1   | 21 | 40  | 2 | 0 | 1 |
| Q5V0S3_HALMA | 1 | Hypothetical protein                        | <i>rmAC2021</i> | mmAC2021  | 158 | 29.7 | 2 | 4 | 0.9998 | R | VIGWAFGAPGATHDWDIAIESR                    | A         | 3         | 2255.0759 | 2255.0818 | 0.0059  | 0       | 2.62    | 2.731 | 0.259 | 581.5 | 1   | 27 | 80  | 2 | 0 | 1 |
| Q5V0S3_HALMA | 1 | Hypothetical protein                        | <i>rmAC2021</i> | mmAC2021  | 158 | 29.7 | 2 | 4 | 0.9989 | R | VIGWAFGAPGATHDWDIAIESR                    | A         | 3         | 2255.0759 | 2255.0811 | 0.0052  | 0       | 2.31    | 2.449 | 0.207 | 497.1 | 1   | 25 | 80  | 2 | 0 | 1 |
| Q5V0V8_HALMA | 1 | Enoyl-CoA hydratase/isomerase (EC 4.2.1.17) | <i>ech5</i>     | mmAC1979  | 196 | 15.8 | 3 | 4 | 0.9974 | K | RLJQDGLEK                                 | S         | 2         | 1070.6084 | 1070.3253 | -0.2831 | 0       | -264.43 | 2.118 | 0.104 | 959.9 | 1   | 13 | 16  | 2 | 0 | 1 |
| Q5V0V8_HALMA | 1 | Enoyl-CoA hydratase/isomerase (EC 4.2.1.17) | <i>ech5</i>     | mmAC1979  | 196 | 15.8 | 3 | 4 | 0.9800 | K | ELVFTGEILDAR                              | R         | 2         | 1361.7191 | 1361.7254 | 0.0063  | 0       | 4.63    | 1.822 | 0.152 | 217.8 | 28  | 13 | 22  | 2 | 0 | 1 |
| Q5V0V8_HALMA | 1 | Enoyl-CoA hydratase/isomerase (EC 4.2.1.17) | <i>ech5</i>     | mmAC1979  | 196 | 15.8 | 3 | 4 | 0.9965 | R | IANGPTVALR                                | H         | 2         | 1010.5873 | 1010.5877 | 0.0004  | 0       | 0.40    | 2.044 | 0.206 | 315.3 | 31  | 11 | 18  | 2 | 0 | 1 |
| Q5V0V8_HALMA | 1 | Enoyl-CoA hydratase/isomerase (EC 4.2.1.17) | <i>ech5</i>     | mmAC1979  | 196 | 15.8 | 3 | 4 | 0.9856 | R | IANGPTVALR                                | H         | 2         | 1010.5873 | 1010.5875 | 0.0002  | 0       | 0.20    | 2.047 | 0.171 | 306.1 | 263 | 10 | 18  | 2 | 0 | 1 |
| Q5V1A6_HALMA | 1 | Hypothetical protein                        | <i>rmAC1808</i> | mmAC1808  |     |      |   |   |        |   |                                           |           |           |           |           |         |         |         |       |       |       |     |    |     |   |   |   |

|                  |   |                                                       |                 |          |     |      |   |   |        |   |                                            |   |   |           |           |         |         |        |       |       |       |     |    |     |   |   |   |
|------------------|---|-------------------------------------------------------|-----------------|----------|-----|------|---|---|--------|---|--------------------------------------------|---|---|-----------|-----------|---------|---------|--------|-------|-------|-------|-----|----|-----|---|---|---|
| Q5V4P0_HALMA     | 1 | Sensor protein (EC 2.7.13.3)                          | <i>htlD</i>     | mmAC0487 | 461 | 13.2 | 3 | 4 | 1      | R | AQDLLANLFR                                 | N | 2 | 1159.6349 | 1159.6454 | 0.0105  | 0       | 9.05   | 2.87  | 0.29  | 1230  | 1   | 16 | 18  | 2 | 0 | 1 |
| Q5V4P0_HALMA     | 1 | Sensor protein (EC 2.7.13.3)                          | <i>htlD</i>     | mmAC0487 | 461 | 13.2 | 3 | 4 | 0.9999 | R | AQDLLANLFR                                 | N | 2 | 1159.6349 | 1159.6254 | -0.0095 | 0       | -8.19  | 2.564 | 0.253 | 748.5 | 1   | 14 | 18  | 2 | 0 | 1 |
| Q5V4P0_HALMA     | 1 | Sensor protein (EC 2.7.13.3)                          | <i>htlD</i>     | mmAC0487 | 461 | 13.2 | 3 | 4 | 0.9790 | R | SEDAVGGRRHYHNQYIPVDSHR                     | K | 5 | 2436.1319 | 2436.1265 | -0.0054 | 0       | -2.22  | 2.127 | 0.011 | 1071  | 2   | 44 | 160 | 2 | 1 | 1 |
| Q5V4P5_HALMA     | 1 | Putative NAD(P)H-dependent xylose reductase           | <i>yajO</i>     | mmAC0482 | 325 | 12.3 | 2 | 4 | 1      | R | GYLTRPHEQVEETVR                            | G | 3 | 1812.9118 | 1812.9081 | -0.0037 | 0       | -2.04  | 3.103 | 0.302 | 908.2 | 1   | 24 | 56  | 2 | 0 | 1 |
| Q5V4P5_HALMA     | 1 | Putative NAD(P)H-dependent xylose reductase           | <i>yajO</i>     | mmAC0482 | 325 | 12.3 | 2 | 4 | 0.9996 | R | GYLTRPHEQVEETVR                            | G | 3 | 1812.9118 | 1812.9076 | -0.0042 | 0       | -2.32  | 2.855 | 0.197 | 851.6 | 1   | 24 | 56  | 2 | 0 | 1 |
| Q5V4P5_HALMA     | 1 | Putative NAD(P)H-dependent xylose reductase           | <i>yajO</i>     | mmAC0482 | 325 | 12.3 | 2 | 4 | 1      | R | LSGMDTVDLYQTHRWYDPTPIEQTLR                 | A | 3 | 3065.4553 | 3067.4783 | 2.0230  | -2.0067 | 5.32   | 4.804 | 0.456 | 1496  | 1   | 32 | 96  | 2 | 1 | 1 |
| Q5V4U5_HALMA     | 1 | Arylsulfatase                                         | <i>rmAC0423</i> | mmAC0423 | 444 | 6.8  | 3 | 4 | 0.9991 | M | TSVALIVLDTLRK                              | D | 2 | 1427.8711 | 1427.8787 | 0.0076  | 0       | 5.32   | 3.128 | 0.383 | 1342  | 1   | 18 | 24  | 2 | 0 | 1 |
| Q5V4U5_HALMA     | 1 | Arylsulfatase                                         | <i>rmAC0423</i> | mmAC0423 | 444 | 6.8  | 3 | 4 | 1      | R | THTVSDSGAQEGLSYVR                          | G | 3 | 1805.8544 | 1805.8577 | 0.0033  | 0       | 1.83   | 3.179 | 0.392 | 994   | 1   | 26 | 64  | 2 | 0 | 1 |
| Q5V4U5_HALMA     | 1 | Arylsulfatase                                         | <i>rmAC0423</i> | mmAC0423 | 444 | 6.8  | 3 | 4 | 0.9174 | M | TSVALIVLDTLR                               | K | 2 | 1299.7762 | 1299.7654 | -0.0108 | 0       | -8.31  | 2.121 | 0.23  | 531.9 | 1   | 14 | 22  | 2 | 0 | 1 |
| Q5V4W3_HALMA     | 1 | Hypothetical protein                                  | <i>rmAC0403</i> | mmAC0403 | 132 | 46.2 | 2 | 4 | 0.9984 | K | DAVENHDEAQAAIKEFEQIREEFMLAR                | Q | 4 | 3204.5190 | 3205.5310 | 1.0120  | -1.0034 | 2.70   | 3.192 | 0.176 | 1077  | 1   | 43 | 156 | 2 | 2 | 1 |
| Q5V4W3_HALMA     | 1 | Hypothetical protein                                  | <i>rmAC0403</i> | mmAC0403 | 132 | 46.2 | 2 | 4 | 1      | K | DAVENHDEAQAAIKEFEQIREEFMLAR                | Q | 4 | 3188.5196 | 3188.5271 | 0.0075  | 0       | 2.35   | 4.756 | 0.322 | 1749  | 1   | 45 | 156 | 2 | 2 | 1 |
| Q5V4W3_HALMA     | 1 | Hypothetical protein                                  | <i>rmAC0403</i> | mmAC0403 | 132 | 46.2 | 2 | 4 | 0.9995 | K | DAVENHDEAQAAIKEFEQIREEFMLAR                | Q | 4 | 3188.5196 | 3190.5310 | 2.0114  | -2.0067 | 1.47   | 4.454 | 0.217 | 1764  | 1   | 46 | 156 | 2 | 2 | 1 |
| Q5V4W3_HALMA     | 1 | Hypothetical protein                                  | <i>rmAC0403</i> | mmAC0403 | 132 | 46.2 | 2 | 4 | 0.9998 | M | SIETDTAADIDGRVEALATEFGEAIAELPVYQR          | F | 3 | 3664.7744 | 3666.7881 | 2.0137  | -2.0067 | 1.91   | 4.864 | 0.464 | 1431  | 1   | 39 | 132 | 2 | 1 | 1 |
| Q5V4W7_HALMA     | 1 | Hypothetical protein                                  | <i>rmAC0397</i> | mmAC0397 | 298 | 13.8 | 3 | 4 | 0.9986 | R | KGRPLEAVLR                                 | L | 3 | 1266.7408 | 1266.7582 | 0.0174  | 0       | 13.74  | 2.518 | 0.15  | 770.4 | 1   | 22 | 40  | 2 | 0 | 1 |
| Q5V4W7_HALMA     | 1 | Hypothetical protein                                  | <i>rmAC0397</i> | mmAC0397 | 298 | 13.8 | 3 | 4 | 0.9471 | K | GNQDAVADVYHR                               | I | 3 | 1343.6218 | 1343.6226 | 0.0008  | 0       | 0.60   | 2.116 | 0.019 | 546.2 | 1   | 19 | 44  | 2 | 0 | 1 |
| Q5V4W7_HALMA     | 1 | Hypothetical protein                                  | <i>rmAC0397</i> | mmAC0397 | 298 | 13.8 | 3 | 4 | 0.9282 | R | LTGTTDLADDIISTLRYEK                        | A | 3 | 2011.0109 | 2011.0224 | 0.0115  | 0       | 5.72   | 2.068 | 0.121 | 352.8 | 64  | 22 | 68  | 2 | 1 | 1 |
| Q5V580_HALMA     | 1 | AP-endonuclease/AP-lyase (EC 3.1.21.2) (EC 4.2.99.18) | <i>apl</i>      | mmAC0265 | 322 | 21.1 | 2 | 4 | 0.9981 | R | LADQLDVNTVTGFGSLPAGGDPDEVNPWITAPWPTEHADAHE | V | 4 | 5072.3641 | 5073.3926 | 1.0285  | -1.0034 | 4.96   | 3.728 | 0.164 | 846.8 | 1   | 47 | 270 | 2 | 0 | 1 |
| Q5V580_HALMA     | 1 | AP-endonuclease/AP-lyase (EC 3.1.21.2) (EC 4.2.99.18) | <i>apl</i>      | mmAC0265 | 322 | 21.1 | 2 | 4 | 1      | R | IGANFDPShLYWQGIDVTEAIR                     | L | 3 | 2501.2339 | 2501.2383 | 0.0044  | 0       | 1.76   | 5.173 | 0.403 | 1887  | 1   | 38 | 84  | 2 | 0 | 1 |
| Q5V580_HALMA     | 1 | AP-endonuclease/AP-lyase (EC 3.1.21.2) (EC 4.2.99.18) | <i>apl</i>      | mmAC0265 | 322 | 21.1 | 2 | 4 | 1      | R | IGANFDPShLYWQGIDVTEAIR                     | L | 3 | 2501.2339 | 2501.2547 | 0.0208  | 0       | 8.32   | 4.548 | 0.417 | 1928  | 1   | 39 | 84  | 2 | 0 | 1 |
| Q5V580_HALMA     | 1 | AP-endonuclease/AP-lyase (EC 3.1.21.2) (EC 4.2.99.18) | <i>apl</i>      | mmAC0265 | 322 | 21.1 | 2 | 4 | 1      | R | IGANFDPShLYWQGIDVTEAIR                     | L | 3 | 2501.2339 | 2501.2398 | 0.0059  | 0       | 2.36   | 4.807 | 0.411 | 2011  | 1   | 37 | 84  | 2 | 0 | 1 |
| Q5V5G0_HALMA     | 1 | Prolyl oligopeptidase family protein                  | <i>pop</i>      | mmAC0178 | 574 | 7    | 3 | 4 | 1      | R | IEAYTAVVEFLDDHV                            | - | 2 | 1719.8355 | 1719.8501 | 0.0146  | 0       | 8.49   | 3.93  | 0.527 | 1973  | 1   | 20 | 28  | 2 | 0 | 1 |
| Q5V5G0_HALMA     | 1 | Prolyl oligopeptidase family protein                  | <i>pop</i>      | mmAC0178 | 574 | 7    | 3 | 4 | 0.9951 | K | AYTHLDVVEKR                                | M | 3 | 1345.6626 | 1345.6581 | -0.0045 | 0       | -3.34  | 2.231 | 0.2   | 404.1 | 57  | 16 | 40  | 2 | 0 | 1 |
| Q5V5G0_HALMA     | 1 | Prolyl oligopeptidase family protein                  | <i>pop</i>      | mmAC0178 | 574 | 7    | 3 | 4 | 0.9998 | R | RPSFSLTQYFLSR                              | G | 3 | 1657.8576 | 1657.8587 | 0.0011  | 0       | 0.66   | 3.052 | 0.217 | 1063  | 1   | 22 | 52  | 2 | 0 | 1 |
| Q5V5G0_HALMA     | 1 | Prolyl oligopeptidase family protein                  | <i>pop</i>      | mmAC0178 | 574 | 7    | 3 | 4 | 0.9759 | R | RPSFSLTQYFLSR                              | G | 3 | 1657.8576 | 1657.8609 | 0.0033  | 0       | 1.99   | 2.149 | 0.081 | 589.5 | 2   | 20 | 52  | 2 | 0 | 1 |
| Q5V5G5_HALMA     | 1 | Hypothetical protein                                  | <i>rmAC0171</i> | mmAC0171 | 359 | 12.3 | 3 | 4 | 0.9792 | R | FAYWVDR                                    | V | 2 | 955.4552  | 955.4455  | -0.0097 | 0       | -10.15 | 1.631 | 0.063 | 623.9 | 1   | 11 | 12  | 2 | 0 | 1 |
| Q5V5G5_HALMA     | 1 | Hypothetical protein                                  | <i>rmAC0171</i> | mmAC0171 | 359 | 12.3 | 3 | 4 | 0.9996 | R | AAGLAPDDFFPIYDRSPHLLSTAK                   | L | 4 | 2454.2543 | 2454.2578 | 0.0035  | 0       | 1.43   | 2.692 | 0.252 | 404.3 | 8   | 32 | 132 | 2 | 1 | 1 |
| Q5V5G5_HALMA     | 1 | Hypothetical protein                                  | <i>rmAC0171</i> | mmAC0171 | 359 | 12.3 | 3 | 4 | 0.9966 | R | FAYWVDR                                    | V | 2 | 955.4552  | 955.4654  | 0.0102  | 0       | 10.68  | 1.728 | 0.154 | 573.7 | 1   | 11 | 12  | 2 | 0 | 1 |
| Q5V5G5_HALMA     | 1 | Hypothetical protein                                  | <i>rmAC0171</i> | mmAC0171 | 359 | 12.3 | 3 | 4 | 0.9993 | R | VHETDVETIGVGER                             | E | 2 | 1539.7529 | 1539.7654 | 0.0125  | 0       | 8.12   | 2.559 | 0.161 | 603.9 | 1   | 17 | 26  | 2 | 0 | 1 |
| Q5V5J2_HALMA     | 1 | Probable translation initiation factor 2 beta subunit | <i>efj2B1</i>   | mmAC0138 | 203 | 26.6 | 4 | 4 | 0.9997 | R | LTNLEAIADAVSR                              | D | 2 | 1371.7358 | 1371.7366 | 0.0008  | 0       | 0.58   | 2.406 | 0.232 | 753.4 | 1   | 18 | 24  | 2 | 0 | 1 |
| Q5V5J2_HALMA     | 1 | Probable translation initiation factor 2 beta subunit | <i>efj2B1</i>   | mmAC0138 | 203 | 26.6 | 4 | 4 | 1      | R | EGQVVEAYIESIGTLAFGR                        | V | 2 | 2125.0691 | 2125.0694 | 0.0003  | 0       | 0.14   | 4.326 | 0.488 | 2003  | 1   | 23 | 38  | 2 | 0 | 1 |
| Q5V5J2_HALMA     | 1 | Probable translation initiation factor 2 beta subunit | <i>efj2B1</i>   | mmAC0138 | 203 | 26.6 | 4 | 4 | 1      | - | MNYEALQR                                   | A | 2 | 1110.5128 | 1110.5147 | 0.0019  | 0       | 1.71   | 2.521 | 0.286 | 1017  | 1   | 14 | 16  | 2 | 0 | 1 |
| Q5V6H1_HALMA     | 1 | Putative plasmid partitioning protein Soj             | <i>sojA</i>     | pNG71175 | 281 | 23.1 | 4 | 4 | 0.9994 | R | ERDYEIETLEQFEELAHLR                        | Q | 3 | 2490.2027 | 2491.3032 | 1.1005  | -1.0034 | 39.01  | 4.039 | 0.234 | 677.9 | 7   | 23 | 76  | 2 | 1 | 1 |
| Q5V6H1_HALMA     | 1 | Putative plasmid partitioning protein Soj             | <i>sojA</i>     | pNG71175 | 281 | 23.1 | 4 | 4 | 1      | R | DYEIETLEQFEELAHLR                          | Q | 3 | 2205.0589 | 2205.0642 | 0.0053  | 0       | 2.40   | 3.569 | 0.275 | 981.1 | 1   | 29 | 68  | 2 | 0 | 1 |
| Q5V6H1_HALMA     | 1 | Putative plasmid partitioning protein Soj             | <i>sojA</i>     | pNG71175 | 281 | 23.1 | 4 | 4 | 0.9834 | R | ERDYEIETLEQFEELAHLR                        | Q | 3 | 2490.2027 | 2491.3013 | 1.0986  | -1.0034 | 38.25  | 3.419 | 0.144 | 510.1 | 21  | 21 | 76  | 2 | 1 | 1 |
| Q5V6H1_HALMA     | 1 | Putative plasmid partitioning protein Soj             | <i>sojA</i>     | pNG71175 | 281 | 23.1 | 4 | 4 | 1      | R | GPFSDLITSEGVVDVLPAHNSLEVLK                 | H | 3 | 2852.4443 | 2852.4656 | 0.0213  | 0       | 7.47   | 3.67  | 0.437 | 454.9 | 2   | 29 | 104 | 2 | 0 | 1 |
| Q5V7C8_HALMA     | 1 | Hypothetical protein                                  | <i>pNG6121</i>  | pNG6121  | 445 | 9.7  | 4 | 4 | 1      | R | ELGEENTSVTVQAR                             | W | 2 | 1531.7478 | 1531.7454 | -0.0024 | 0       | -1.57  | 2.793 | 0.3   | 734   | 1   | 15 | 26  | 2 | 0 | 1 |
| Q5V7C8_HALMA     | 1 | Hypothetical protein                                  | <i>pNG6121</i>  | pNG6121  | 445 | 9.7  | 4 | 4 | 0.9997 | R | ASPDGMLFLLR                                | G | 2 | 1218.6431 | 1218.6430 | -0.0001 | 0       | -0.08  | 2.418 | 0.263 | 349.1 | 9   | 15 | 20  | 2 | 0 | 1 |
| Q5V7C8_HALMA     | 1 | Hypothetical protein                                  | <i>pNG6121</i>  | pNG6121  | 445 | 9.7  | 4 | 4 | 0.9654 | T | WTGLEGR                                    | T | 2 | 817.4082  | 817.4054  | -0.0028 | 0       | -3.43  | 1.525 | 0.195 | 332.8 | 142 | 10 | 12  | 2 | 0 | 1 |
| Q5V7C8_HALMA     | 1 | Hypothetical protein                                  | <i>pNG6121</i>  | pNG6121  | 445 | 9.7  | 4 | 4 | 0.9552 | R | WTGLEGR                                    | T | 2 | 817.4082  | 817.4054  | -0.0028 | 0       | -3.43  | 1.815 | 0.061 | 585.4 | 44  | 12 | 12  | 2 | 0 | 1 |
| Q5V7K6_HALMA     | 1 | Hypothetical protein                                  | <i>pNG5051</i>  | pNG5051  | 238 | 19.3 | 3 | 4 | 1      | K | ITEKELLDEITR                               | L | 3 | 1458.7929 | 1458.7906 | -0.0023 | 0       | -1.58  | 4.064 | 0.226 | 1086  | 1   | 24 | 44  | 2 | 1 | 1 |
| Q5V7K6_HALMA     | 1 | Hypothetical protein                                  | <i>pNG5051</i>  | pNG5051  | 238 | 19.3 | 3 | 4 | 0.9999 | R | LADDLNKKPTALDMNMKHGR                       | Y | 5 | 2136.1109 | 2136.1133 | 0.0024  | 0       | 1.12   | 3.316 | 0.226 | 888.8 | 3   | 43 | 144 | 2 | 2 | 1 |
| Q5V7K6_HALMA     | 1 | Hypothetical protein                                  | <i>pNG5051</i>  | pNG5051  | 238 | 19.3 | 3 | 4 | 0.9430 | R | LADDLNKKPTALDMNMKHGR                       | Y | 5 | 2136.1109 | 2136.1126 | 0.0017  | 0       | 0.80   | 2.12  | 0.02  | 911   | 7   | 44 | 144 | 2 | 2 | 1 |
| Q5V7K6_HALMA     | 1 | Hypothetical protein                                  | <i>pNG5051</i>  | pNG5051  | 238 | 19.3 | 3 | 4 | 0.9167 | R | QMDEIGKYASATYQR                            | H | 3 | 1759.8199 | 1759.8081 | -0.0118 | 0       | -6.71  | 2.078 | 0.093 | 241.3 | 39  | 18 | 56  | 2 | 1 | 1 |
| Q5V7T9_HALMA     | 1 | Hypothetical protein                                  | <i>pNG4013</i>  | pNG4013  | 138 | 23.9 | 2 | 4 | 0.9976 | R | GSLVGLLVR                                  | A | 2 | 912.5756  | 912.5655  | -0.0101 | 0       | -11.07 | 2.122 | 0.176 | 357.2 | 12  | 11 | 16  | 2 | 0 | 1 |
| Q5V7T9_HALMA     | 1 | Hypothetical protein                                  | <i>pNG4013</i>  | pNG4013  | 138 | 23.9 | 2 | 4 | 1      | R | AGLAEVRPDLIEAGEDGYETFTTER                  | Q | 3 | 2637.2558 | 2637.2573 | 0.0015  | 0       | 0.57   | 5.705 | 0.55  | 2575  | 1   | 39 | 92  | 2 | 0 | 1 |
| Q5V7T9_HALMA     | 1 | Hypothetical protein                                  | <i>pNG4013</i>  | pNG4013  | 138 | 23.9 | 2 | 4 | 0.9990 | R | GSLVGLLVR                                  | A | 2 | 912.5756  | 913.5854  | 1.0098  | -1.0034 | 7.07   | 2.583 | 0.23  | 896.5 | 2   | 13 | 16  | 2 | 0 | 1 |
| Q5V7T9_HALMA     | 1 | Hypothetical protein                                  | <i>pNG4013</i>  | pNG4013  | 138 | 23.9 | 2 | 4 | 0.9985 | R | GSLVGLLVR                                  | A | 2 | 912.5756  | 912.5750  | -0.0006 | 0       | -0.66  | 1.842 | 0.201 | 970.3 | 1   | 13 | 16  | 2 | 0 | 1 |
| RPOD_HALMAReview | 1 | DNA-directed RNA polymerase subunit D (EC 2.7.7.6)    | <i>rpoD</i>     | mmAC0062 | 259 | 24.7 | 4 | 4 | 1      | R | HLQQVEVVGDLGEFFDDDPNILR                    | G | 3 | 2636.2718 | 2636.2815 | 0.0097  | 0       | 3.68   | 3.917 | 0.382 | 1289  | 1   | 32 | 88  | 2 | 0 | 1 |
| RPOD_HALMAReview | 1 | DNA-directed RNA polymerase subunit D (EC 2.7.7.6)    | <i>rpoD</i>     | mmAC0062 | 259 | 24.7 | 4 | 4 | 0.9976 | R | GTTPAFANGIR                                | R | 2 | 1115.6087 | 1115.6092 | 0.0005  | 0       | 0.45   | 1.896 | 0.196 | 690.8 | 2   | 15 | 20  | 2 | 0 | 1 |
| RPOD_HALMAReview | 1 | DNA-directed RNA polymerase subunit D (EC 2.7.7.6)    | <i>rpoD</i>     |          |     |      |   |   |        |   |                                            |   |   |           |           |         |         |        |       |       |       |     |    |     |   |   |   |

|                  |        |                                                                                                                                             |                  |          |     |      |   |   |        |   |                                   |   |   |           |           |         |         |        |       |       |       |    |    |     |   |   |   |
|------------------|--------|---------------------------------------------------------------------------------------------------------------------------------------------|------------------|----------|-----|------|---|---|--------|---|-----------------------------------|---|---|-----------|-----------|---------|---------|--------|-------|-------|-------|----|----|-----|---|---|---|
| Q5UYA5_HALMA     | 0.9857 | Putative cobalamin biosynthesis protein                                                                                                     | <i>cbiX</i>      | mmAC3023 | 257 | 10.5 | 1 | 4 | 1      | R | GGLAYTDTLGDHPLVTEAVATAVETAR       | T | 3 | 2727.3715 | 2727.3789 | 0.0074  | 0       | 2.71   | 3.795 | 0.42  | 496.8 | 6  | 24 | 104 | 2 | 0 | 1 |
| Q5UYA5_HALMA     | 0.9857 | Putative cobalamin biosynthesis protein                                                                                                     | <i>cbiX</i>      | mmAC3023 | 257 | 10.5 | 1 | 4 | 1      | R | GGLAYTDTLGDHPLVTEAVATAVETAR       | T | 3 | 2727.3715 | 2727.3745 | 0.0030  | 0       | 1.10   | 4.364 | 0.443 | 1480  | 1  | 34 | 104 | 2 | 0 | 1 |
| Q5UYA5_HALMA     | 0.9857 | Putative cobalamin biosynthesis protein                                                                                                     | <i>cbiX</i>      | mmAC3023 | 257 | 10.5 | 1 | 4 | 1      | R | GGLAYTDTLGDHPLVTEAVATAVETAR       | T | 3 | 2727.3715 | 2727.3836 | 0.0121  | 0       | 4.44   | 4.333 | 0.409 | 1379  | 1  | 34 | 104 | 2 | 0 | 1 |
| Q5UZN8_HALMA     | 0.9857 | Thioredoxin                                                                                                                                 | <i>trxA1</i>     | mmAC2458 | 115 | 14.8 | 1 | 4 | 1      | R | RADGFVPAEDLIEFVER                 | G | 3 | 1961.9847 | 1961.9917 | 0.0070  | 0       | 3.57   | 3.735 | 0.354 | 1609  | 1  | 31 | 64  | 2 | 0 | 1 |
| Q5UZN8_HALMA     | 0.9857 | Thioredoxin                                                                                                                                 | <i>trxA1</i>     | mmAC2458 | 115 | 14.8 | 1 | 4 | 1      | R | RADGFVPAEDLIEFVER                 | G | 3 | 1961.9847 | 1961.9872 | 0.0025  | 0       | 1.27   | 3.85  | 0.332 | 1648  | 1  | 29 | 64  | 2 | 0 | 1 |
| Q5UZN8_HALMA     | 0.9857 | Thioredoxin                                                                                                                                 | <i>trxA1</i>     | mmAC2458 | 115 | 14.8 | 1 | 4 | 1      | R | RADGFVPAEDLIEFVER                 | G | 3 | 1961.9847 | 1963.9882 | 2.0035  | -2.0067 | -1.63  | 4.334 | 0.327 | 1535  | 1  | 30 | 64  | 2 | 0 | 1 |
| Q5UZN8_HALMA     | 0.9857 | Thioredoxin                                                                                                                                 | <i>trxA1</i>     | mmAC2458 | 115 | 14.8 | 1 | 4 | 0.9999 | R | RADGFVPAEDLIEFVER                 | G | 3 | 1961.9847 | 1961.9882 | 0.0035  | 0       | 1.78   | 3.268 | 0.264 | 749.4 | 3  | 23 | 64  | 2 | 0 | 1 |
| Q5V189_HALMA     | 0.9857 | Hypothetical protein                                                                                                                        | <i>rrmAC1826</i> | mmAC1826 | 78  | 34.6 | 1 | 4 | 1      | R | LLAVLSDIREDEAEGVEDVDTLMEDYQ       | - | 2 | 3066.4227 | 3066.4202 | -0.0025 | 0       | -0.82  | 4.215 | 0.516 | 1453  | 1  | 24 | 52  | 2 | 1 | 1 |
| Q5V189_HALMA     | 0.9857 | Hypothetical protein                                                                                                                        | <i>rrmAC1826</i> | mmAC1826 | 78  | 34.6 | 1 | 4 | 1      | R | LLAVLSDIREDEAEGVEDVDTLMEDYQ       | - | 2 | 3066.4227 | 3066.4234 | 0.0007  | 0       | 0.23   | 4.304 | 0.583 | 1615  | 1  | 25 | 52  | 2 | 1 | 1 |
| Q5V189_HALMA     | 0.9857 | Hypothetical protein                                                                                                                        | <i>rrmAC1826</i> | mmAC1826 | 78  | 34.6 | 1 | 4 | 1      | R | LLAVLSDIREDEAEGVEDVDTLMEDYQ       | - | 2 | 3066.4227 | 3066.4385 | 0.0158  | 0       | 5.15   | 4.278 | 0.535 | 1370  | 1  | 24 | 52  | 2 | 1 | 1 |
| Q5V189_HALMA     | 0.9857 | Hypothetical protein                                                                                                                        | <i>rrmAC1826</i> | mmAC1826 | 78  | 34.6 | 1 | 4 | 1      | R | LLAVLSDIREDEAEGVEDVDTLMEDYQ       | - | 2 | 3066.4227 | 3066.4129 | -0.0098 | 0       | -3.20  | 4.545 | 0.581 | 1384  | 1  | 24 | 52  | 2 | 1 | 1 |
| Q5V4H6_HALMA     | 0.9857 | Universal stress protein                                                                                                                    | <i>usp14</i>     | mmAC0561 | 150 | 18   | 1 | 4 | 1      | R | GAVGNHGEQIVSLAEVTSNDLAVVGG        | K | 3 | 2648.3518 | 2648.3609 | 0.0091  | 0       | 3.44   | 3.826 | 0.373 | 1028  | 1  | 32 | 104 | 2 | 0 | 1 |
| Q5V4H6_HALMA     | 0.9857 | Universal stress protein                                                                                                                    | <i>usp14</i>     | mmAC0561 | 150 | 18   | 1 | 4 | 1      | R | GAVGNHGEQIVSLAEVTSNDLAVVGG        | K | 3 | 2648.3518 | 2648.3596 | 0.0078  | 0       | 2.95   | 3.44  | 0.336 | 634.8 | 1  | 26 | 104 | 2 | 0 | 1 |
| Q5V4H6_HALMA     | 0.9857 | Universal stress protein                                                                                                                    | <i>usp14</i>     | mmAC0561 | 150 | 18   | 1 | 4 | 1      | R | GAVGNHGEQIVSLAEVTSNDLAVVGG        | K | 3 | 2648.3518 | 2648.3614 | 0.0096  | 0       | 3.62   | 3.698 | 0.394 | 909.9 | 1  | 34 | 104 | 2 | 0 | 1 |
| Q5V4H6_HALMA     | 0.9857 | Universal stress protein                                                                                                                    | <i>usp14</i>     | mmAC0561 | 150 | 18   | 1 | 4 | 0.9999 | R | GAVGNHGEQIVSLAEVTSNDLAVVGG        | K | 3 | 2648.3518 | 2648.3570 | 0.0052  | 0       | 1.96   | 3.026 | 0.291 | 638.8 | 1  | 29 | 104 | 2 | 0 | 1 |
| Q5V676_HALMA     | 0.9857 | Alcohol dehydrogenase (EC 1.1.1.1)                                                                                                          | <i>adh12</i>     | pNG7278  | 384 | 6    | 1 | 4 | 1      | R | AYADELLADVLQGTLDPSPIFTK           | T | 2 | 2476.2737 | 2476.2791 | 0.0054  | 0       | 2.18   | 3.574 | 0.354 | 1489  | 1  | 23 | 44  | 2 | 0 | 1 |
| Q5V676_HALMA     | 0.9857 | Alcohol dehydrogenase (EC 1.1.1.1)                                                                                                          | <i>adh12</i>     | pNG7278  | 384 | 6    | 1 | 4 | 1      | R | AYADELLADVLQGTLDPSPIFTK           | T | 2 | 2476.2737 | 2476.2844 | 0.0107  | 0       | 4.32   | 3.774 | 0.483 | 1726  | 1  | 25 | 44  | 2 | 0 | 1 |
| Q5V676_HALMA     | 0.9857 | Alcohol dehydrogenase (EC 1.1.1.1)                                                                                                          | <i>adh12</i>     | pNG7278  | 384 | 6    | 1 | 4 | 1      | R | AYADELLADVLQGTLDPSPIFTK           | T | 2 | 2476.2737 | 2476.2859 | 0.0122  | 0       | 4.93   | 3.707 | 0.324 | 1152  | 1  | 22 | 44  | 2 | 0 | 1 |
| Q5V676_HALMA     | 0.9857 | Alcohol dehydrogenase (EC 1.1.1.1)                                                                                                          | <i>adh12</i>     | pNG7278  | 384 | 6    | 1 | 4 | 1      | R | AYADELLADVLQGTLDPSPIFTK           | T | 2 | 2476.2737 | 2476.2854 | 0.0117  | 0       | 4.72   | 3.822 | 0.391 | 1261  | 1  | 22 | 44  | 2 | 0 | 1 |
| Q5V6M5_HALMA     | 0.9842 | Endonuclease III (EC 4.2.99.18)                                                                                                             | <i>nthC</i>      | pNG7116  | 233 | 5.2  | 1 | 4 | 0.9997 | R | FGLVTESATNKR                      | A | 3 | 1321.6990 | 1321.7003 | 0.0013  | 0       | 0.98   | 2.745 | 0.217 | 824.6 | 3  | 21 | 44  | 2 | 0 | 1 |
| Q5V6M5_HALMA     | 0.9842 | Endonuclease III (EC 4.2.99.18)                                                                                                             | <i>nthC</i>      | pNG7116  | 233 | 5.2  | 1 | 4 | 0.9999 | R | FGLVTESATNKR                      | A | 3 | 1321.6990 | 1321.7006 | 0.0016  | 0       | 1.21   | 2.693 | 0.249 | 945   | 1  | 22 | 44  | 2 | 0 | 1 |
| Q5V6M5_HALMA     | 0.9842 | Endonuclease III (EC 4.2.99.18)                                                                                                             | <i>nthC</i>      | pNG7116  | 233 | 5.2  | 1 | 4 | 0.9998 | R | FGLVTESATNKR                      | A | 3 | 1321.6990 | 1321.7013 | 0.0023  | 0       | 1.74   | 2.943 | 0.211 | 914.6 | 1  | 21 | 44  | 2 | 0 | 1 |
| Q5V6M5_HALMA     | 0.9842 | Endonuclease III (EC 4.2.99.18)                                                                                                             | <i>nthC</i>      | pNG7116  | 233 | 5.2  | 1 | 4 | 0.9996 | R | FGLVTESATNKR                      | A | 3 | 1321.6990 | 1321.7006 | 0.0016  | 0       | 1.21   | 2.976 | 0.192 | 941.6 | 3  | 22 | 44  | 2 | 0 | 1 |
| CAAL_HALMAReview | 1      | Carboxylate-amine ligase rrmAC0866 (EC 6.3.-.-)                                                                                             | <i>rrmAC0866</i> | mmAC0866 | 359 | 10   | 2 | 3 | 1      | - | MDATGSAEHFTR                      | M | 2 | 1321.5721 | 1321.5714 | -0.0007 | 0       | -0.53  | 2.668 | 0.344 | 357.9 | 1  | 17 | 22  | 2 | 0 | 1 |
| CAAL_HALMAReview | 1      | Carboxylate-amine ligase rrmAC0866 (EC 6.3.-.-)                                                                                             | <i>rrmAC0866</i> | mmAC0866 | 359 | 10   | 2 | 3 | 1      | R | DALVDHAEANGFGIAAAGLHPLAK          | W | 3 | 2357.2128 | 2358.2180 | 1.0052  | -1.0034 | 0.78   | 4.931 | 0.434 | 884.8 | 1  | 37 | 92  | 2 | 0 | 1 |
| CAAL_HALMAReview | 1      | Carboxylate-amine ligase rrmAC0866 (EC 6.3.-.-)                                                                                             | <i>rrmAC0866</i> | mmAC0866 | 359 | 10   | 2 | 3 | 1      | R | DALVDHAEANGFGIAAAGLHPLAK          | W | 3 | 2357.2128 | 2357.2154 | 0.0026  | 0       | 1.10   | 4.925 | 0.448 | 1003  | 1  | 38 | 92  | 2 | 0 | 1 |
| DCD_HALMAReview  | 1      | Probable deoxycytidine triphosphate deaminase (EC 3.5.4.13) (dCTPdeaminase)                                                                 | <i>dcd</i>       | mmAC1776 | 195 | 26.2 | 3 | 3 | 1      | R | RLEQGDVLVEPLDDPDIQIPASVDLR        | L | 3 | 3029.5669 | 3031.5979 | 2.0310  | -2.0067 | 8.02   | 7.062 | 0.534 | 1134  | 1  | 41 | 104 | 2 | 0 | 1 |
| DCD_HALMAReview  | 1      | Probable deoxycytidine triphosphate deaminase (EC 3.5.4.13) (dCTPdeaminase)                                                                 | <i>dcd</i>       | mmAC1776 | 195 | 26.2 | 3 | 3 | 1      | - | MILSDADILR                        | R | 2 | 1145.6114 | 1145.6117 | 0.0003  | 0       | 0.26   | 2.59  | 0.335 | 1246  | 1  | 17 | 18  | 2 | 0 | 1 |
| DCD_HALMAReview  | 1      | Probable deoxycytidine triphosphate deaminase (EC 3.5.4.13) (dCTPdeaminase)                                                                 | <i>dcd</i>       | mmAC1776 | 195 | 26.2 | 3 | 3 | 0.9986 | R | VAIPDDLIAHVEGR                    | S | 3 | 1503.8045 | 1503.8050 | 0.0005  | 0       | 0.33   | 1.951 | 0.251 | 362   | 3  | 21 | 52  | 2 | 0 | 1 |
| GATA_HALMAReview | 1      | Glutamyl-tRNA(Gln) amidotransferase subunit A (EC 6.3.5.-) (Glu-ADTsubunit A)                                                               | <i>gatA</i>      | mmAC1355 | 425 | 16.5 | 3 | 3 | 1      | R | VPGGSSGGSAAVVAAGDADLALGSDTGGsir   | C | 2 | 2671.3049 | 2671.3015 | -0.0034 | 0       | -1.27  | 5.842 | 0.566 | 2020  | 1  | 29 | 60  | 2 | 0 | 1 |
| GATA_HALMAReview | 1      | Glutamyl-tRNA(Gln) amidotransferase subunit A (EC 6.3.5.-) (Glu-ADTsubunit A)                                                               | <i>gatA</i>      | mmAC1355 | 425 | 16.5 | 3 | 3 | 0.9610 | R | CPAAFCGVVGIKPTYGLVSR              | Y | 3 | 2037.0539 | 2035.0438 | -2.0101 | 2       | -4.96  | 2.758 | 0.16  | 799.5 | 1  | 28 | 76  | 2 | 0 | 1 |
| GATA_HALMAReview | 1      | Glutamyl-tRNA(Gln) amidotransferase subunit A (EC 6.3.5.-) (Glu-ADTsubunit A)                                                               | <i>gatA</i>      | mmAC1355 | 425 | 16.5 | 3 | 3 | 1      | R | YGQSGGYDGNWNESFANAR               | E | 2 | 2091.8671 | 2092.8706 | 1.0035  | -1.0034 | 0.07   | 5.042 | 0.574 | 1951  | 1  | 24 | 36  | 2 | 0 | 1 |
| KSGA_HALMAReview | 1      | Probable dimethyladenosine transferase (EC 2.1.1.-) (S-adenosylmethionine-6-N',N'-adenosyl(rRNA) dimethyltransferase) (16SrRNA dimethylase) | <i>ksgA</i>      | mmAC0257 | 285 | 19.6 | 3 | 3 | 1      | K | LTPADFATLATALEYVGQPEA             | - | 3 | 2177.0892 | 2178.0962 | 1.0070  | -1.0034 | 1.68   | 4     | 0.352 | 1516  | 1  | 30 | 80  | 2 | 0 | 1 |
| KSGA_HALMAReview | 1      | Probable dimethyladenosine transferase (EC 2.1.1.-) (S-adenosylmethionine-6-N',N'-adenosyl(rRNA) dimethyltransferase) (16SrRNA dimethylase) | <i>ksgA</i>      | mmAC0257 | 285 | 19.6 | 3 | 3 | 1      | R | LLPEQRPLLLMFQQEFAER               | M | 3 | 2357.2565 | 2358.2779 | 1.0214  | -1.0034 | 7.66   | 3.328 | 0.42  | 702.8 | 1  | 30 | 72  | 2 | 0 | 1 |
| PYRI_HALMAReview | 1      | Aspartate carbamoyltransferase regulatory chain                                                                                             | <i>pyrI</i>      | mmAC1224 | 155 | 45.2 | 3 | 3 | 0.9725 | K | GRVERPSVVEGVLECPNHNHCITTENPEVDSR  | F | 4 | 3434.6307 | 3433.6109 | -1.0198 | 1       | -11.59 | 3.787 | 0.169 | 1183  | 1  | 45 | 180 | 2 | 1 | 1 |
| PYRI_HALMAReview | 1      | Aspartate carbamoyltransferase regulatory chain                                                                                             | <i>pyrI</i>      | mmAC1224 | 155 | 45.2 | 3 | 3 | 0.9999 | R | ELSQNEVDVLSLIAAPAATINIRDIYEVVEK   | G | 3 | 3340.7766 | 3340.7964 | 0.0198  | 0       | 5.93   | 3.486 | 0.272 | 658.9 | 1  | 29 | 116 | 2 | 1 | 1 |
| PYRI_HALMAReview | 1      | Aspartate carbamoyltransferase regulatory chain                                                                                             | <i>pyrI</i>      | mmAC1224 | 155 | 45.2 | 3 | 3 | 0.9608 | R | FAVGDDGVR                         | C | 2 | 934.4508  | 934.4536  | 0.0028  | 0       | 3.00   | 1.78  | 0.02  | 902.7 | 2  | 14 | 16  | 2 | 0 | 1 |
| Q5UWD0_HALMA     | 1      | Hypothetical protein                                                                                                                        | <i>rmB0248</i>   | mmB0248  | 144 | 36.1 | 3 | 3 | 0.9977 | R | EIILDEVEEAAESVDGIETASVR           | L | 3 | 2473.2071 | 2473.2158 | 0.0087  | 0       | 3.52   | 3.254 | 0.194 | 465.5 | 74 | 21 | 88  | 2 | 0 | 1 |
| Q5UWD0_HALMA     | 1      | Hypothetical protein                                                                                                                        | <i>rmB0248</i>   | mmB0248  | 144 | 36.1 | 3 | 3 | 1      | R | LVWSPDWSIDLVTQEGK                 | - | 2 | 1971.9942 | 1974.0054 | 2.0112  | -2.0067 | 2.28   | 3.78  | 0.432 | 1647  | 1  | 24 | 32  | 2 | 0 | 1 |
| Q5UWD0_HALMA     | 1      | Hypothetical protein                                                                                                                        | <i>rmB0248</i>   | mmB0248  | 144 | 36.1 | 3 | 3 | 0.9939 | R | LVWSPDWSIDLVTQEGKEALRDFGMSFDG     | E | 3 | 3297.5652 | 3298.5681 | 1.0029  | -1.0034 | -0.14  | 2.449 | 0.263 | 300.2 | 9  | 25 | 112 | 2 | 2 | 1 |
| Q5UX35_HALMA     | 1      | Acetyl-coA acetyltransferase (EC 2.3.1.9)                                                                                                   | <i>yqeF</i>      | mmAC3497 | 387 | 12.1 | 3 | 3 | 1      | R | SAIALGSAAVEGLNLR                  | T | 3 | 1540.8573 | 1541.8551 | 0.9978  | -1.0034 | -3.60  | 3.433 | 0.315 | 878.1 | 1  | 28 | 60  | 2 | 0 | 1 |
| Q5UX35_HALMA     | 1      | Acetyl-coA acetyltransferase (EC 2.3.1.9)                                                                                                   | <i>yqeF</i>      | mmAC3497 | 387 | 12.1 | 3 | 3 | 0.9997 | K | LSDGAGAVVLADAEVTKR                | E | 3 | 1770.9475 | 1770.9381 | -0.0094 | 0       | -5.31  | 3.009 | 0.217 | 571.4 | 1  | 25 | 68  | 2 | 0 | 1 |
| Q5UXF0_HALMA     | 1      | Transcription regulator                                                                                                                     | <i>trh3</i>      | mmAC3365 | 137 | 10.2 | 2 | 3 | 0.9998 | - | MDLDLREILSILR                     | D | 3 | 1743.9301 | 1743.9357 | 0.0056  | 0       | 3.21   | 3.268 | 0.249 | 382.4 | 15 | 21 | 52  | 2 | 1 | 1 |
| Q5UXF0_HALMA     | 1      | Transcription regulator                                                                                                                     | <i>trh3</i>      | mmAC3365 | 137 | 10.2 | 2 | 3 | 1      | - | MDLDLREILSILR                     | R | 3 | 1587.8290 | 1587.8271 | -0.0019 | 0       | -1.20  | 3.771 | 0.358 | 1251  | 2  | 27 | 48  | 2 | 1 | 1 |
| Q5UXF0_HALMA     | 1      | Transcription regulator                                                                                                                     | <i>trh3</i>      | mmAC3365 | 137 | 10.2 | 2 | 3 | 0.9992 | R | MDLDLREILSILR                     | R | 3 | 1587.8290 | 1588.8382 | 1.0092  | -1.0034 | 3.68   | 3.694 | 0.243 | 1021  | 49 | 23 | 48  | 2 | 1 | 1 |
| Q5UXH3_HALMA     | 1      | Heat shock protein GrpE protein                                                                                                             | <i>grpE</i>      | mmAC3340 | 226 | 24.3 | 3 | 3 | 1      | R | TRVDLSLESQVEQDGDIEELEEK           | L | 3 | 2675.2409 | 2675.2510 | 0.0101  | 0       | 3.78   | 5.9   | 0.43  | 1466  | 1  | 30 | 88  | 2 | 1 | 1 |
| Q5UXH3_HALMA     | 1      | Heat shock protein GrpE protein                                                                                                             | <i>grpE</i>      | mmAC3340 | 226 | 24.3 | 3 | 3 | 0.9999 | D | PGGDVDPQTQHVLAR                   | V | 3 | 1588.7957 | 1589.7982 | 1.0025  | -1.0034 | -0.53  | 4.109 | 0.454 | 1059  | 1  | 29 | 56  | 1 | 0 | 1 |
| Q5UXH3_HALMA     | 1      | Heat shock protein GrpE protein                                                                                                             | <i>grpE</i>      | mmAC3340 | 226 | 24.3 | 3 | 3 | 1      | R | QLDDVLDAENVEVIDPDGPGVDVDPQTQHVLAR | V | 3 | 3468.6645 | 3468.6636 | -0.0009 | 0       | -0.26  | 4.145 | 0.356 | 1335  | 1  | 37 | 124 | 2 | 0 |   |

|                    |        |                                                                                         |                 |          |      |      |   |   |        |   |                                     |   |   |           |           |         |         |        |       |       |       |    |    |     |   |   |   |
|--------------------|--------|-----------------------------------------------------------------------------------------|-----------------|----------|------|------|---|---|--------|---|-------------------------------------|---|---|-----------|-----------|---------|---------|--------|-------|-------|-------|----|----|-----|---|---|---|
| Q5V1B8_HALMA       | 1      | Hypothetical protein                                                                    | <i>rmAC1793</i> | mmAC1793 | 249  | 15.3 | 2 | 3 | 1      | R | GEAFDYLLGER                         | T | 2 | 1268.6037 | 1268.6054 | 0.0017  | 0       | 1.34   | 3.228 | 0.375 | 1501  | 1  | 17 | 20  | 2 | 0 | 1 |
| Q5V1B8_HALMA       | 1      | Hypothetical protein                                                                    | <i>rmAC1793</i> | mmAC1793 | 249  | 15.3 | 2 | 3 | 1      | R | DLRGDPDAQQDAIDTFDADSALTDAR          | T | 3 | 2920.2958 | 2920.3091 | 0.0133  | 0       | 4.55   | 5.256 | 0.454 | 2061  | 1  | 35 | 104 | 2 | 1 | 1 |
| Q5V1B8_HALMA       | 1      | Hypothetical protein                                                                    | <i>rmAC1793</i> | mmAC1793 | 249  | 15.3 | 2 | 3 | 1      | R | DLRGDPDAQQDAIDTFDADSALTDAR          | T | 3 | 2920.2958 | 2921.3181 | 1.0223  | -1.0034 | 6.49   | 6.048 | 0.528 | 1962  | 1  | 38 | 104 | 2 | 1 | 1 |
| Q5V1H6_HALMA       | 1      | Hypothetical protein                                                                    | <i>rmAC1721</i> | mmAC1721 | 236  | 23.3 | 3 | 3 | 1      | R | EAGTEWLVEFHDNPEDFPVDAIQAGIDGMTPLLR  | - | 3 | 3634.7249 | 3634.7422 | 0.0173  | 0       | 4.76   | 5.94  | 0.487 | 2307  | 1  | 42 | 128 | 2 | 0 | 1 |
| Q5V1H6_HALMA       | 1      | Hypothetical protein                                                                    | <i>rmAC1721</i> | mmAC1721 | 236  | 23.3 | 3 | 3 | 0.9998 | - | MetHqL.WTLR                         | E | 2 | 1360.7173 | 1362.6853 | 1.9680  | -2.0067 | -28.44 | 2.98  | 0.325 | 1327  | 1  | 17 | 20  | 2 | 0 | 1 |
| Q5V1S0_HALMA       | 1      | N(5)N(10)-methenyltetrahydromethanopterin cyclohydrolase(EC 3.5.4.27)                   | <i>mch</i>      | mmAC1616 | 310  | 16.8 | 3 | 3 | 1      | R | APVAPVADDEATAMAR                    | T | 2 | 1583.7613 | 1583.7635 | 0.0022  | 0       | 1.39   | 4.187 | 0.508 | 1357  | 1  | 26 | 30  | 2 | 0 | 1 |
| Q5V1S0_HALMA       | 1      | N(5)N(10)-methenyltetrahydromethanopterin cyclohydrolase(EC 3.5.4.27)                   | <i>mch</i>      | mmAC1616 | 310  | 16.8 | 3 | 3 | 0.9999 | K | GGWELAVDDFQALGSGPAR                 | A | 2 | 1944.9330 | 1946.4054 | 1.4724  | -1.0034 | 241.17 | 2.957 | 0.363 | 1285  | 1  | 21 | 36  | 2 | 0 | 1 |
| Q5V1S0_HALMA       | 1      | N(5)N(10)-methenyltetrahydromethanopterin cyclohydrolase(EC 3.5.4.27)                   | <i>mch</i>      | mmAC1616 | 310  | 16.8 | 3 | 3 | 1      | R | LAELGFPVSVLSASGR                    | A | 2 | 1716.9046 | 1716.9149 | 0.0103  | 0       | 6.00   | 4.271 | 0.582 | 2247  | 1  | 25 | 32  | 2 | 0 | 1 |
| Q5V2K6_HALMA       | 1      | RecJ exonuclease                                                                        | <i>recJ1</i>    | mmAC1311 | 337  | 17.2 | 3 | 3 | 1      | R | GSVLISHVGR                          | E | 2 | 1023.5825 | 1023.5827 | 0.0002  | 0       | 0.20   | 2.701 | 0.28  | 1061  | 1  | 15 | 18  | 2 | 0 | 1 |
| Q5V2K6_HALMA       | 1      | RecJ exonuclease                                                                        | <i>recJ1</i>    | mmAC1311 | 337  | 17.2 | 3 | 3 | 0.9991 | R | STDSRVNIGDILSESLSDVGSAGGHR          | T | 4 | 2628.2739 | 2629.2810 | 1.0071  | -1.0034 | 1.43   | 3.91  | 0.195 | 1686  | 1  | 49 | 150 | 2 | 1 | 1 |
| Q5V2K6_HALMA       | 1      | RecJ exonuclease                                                                        | <i>recJ1</i>    | mmAC1311 | 337  | 17.2 | 3 | 3 | 0.9948 | R | VPDQVSVDIVVDHHPAEDITAR              | F | 4 | 2398.1764 | 2398.0955 | -0.0809 | 0       | -33.73 | 2.807 | 0.084 | 886.5 | 2  | 42 | 126 | 2 | 0 | 1 |
| Q5V2S2_HALMA       | 1      | Cysteine synthase (EC 2.5.1.47)                                                         | <i>cysK1</i>    | mmAC1236 | 303  | 13.5 | 3 | 3 | 0.9998 | K | AYGAIEELVEGDISDAKER                 | A | 3 | 2064.0011 | 2066.0181 | 2.0170  | -2.0067 | 4.99   | 3.194 | 0.309 | 514   | 1  | 27 | 72  | 2 | 1 | 1 |
| Q5V2S2_HALMA       | 1      | Cysteine synthase (EC 2.5.1.47)                                                         | <i>cysK1</i>    | mmAC1236 | 303  | 13.5 | 3 | 3 | 0.9998 | R | RLAHEEGILVGQSGASNLAAAR              | E | 3 | 2235.1720 | 2236.1709 | 0.9989  | -1.0034 | -1.99  | 3.282 | 0.296 | 1283  | 1  | 32 | 84  | 2 | 0 | 1 |
| Q5V3F2_HALMA       | 1      | NADPH-dependent FMN reductase (EC 1.5.1.29)                                             | <i>ssuE1</i>    | mmAC0982 | 192  | 34.4 | 3 | 3 | 1      | R | ALAAAEEETGATTELLDLQEFDLPVFDADHR     | E | 3 | 3257.5728 | 3258.5779 | 1.0051  | -1.0034 | 0.54   | 5.397 | 0.507 | 1295  | 1  | 33 | 116 | 2 | 0 | 1 |
| Q5V3F2_HALMA       | 1      | NADPH-dependent FMN reductase (EC 1.5.1.29)                                             | <i>ssuE1</i>    | mmAC0982 | 192  | 34.4 | 3 | 3 | 1      | K | TVGLLAVAGGGFPITALEHLR               | S | 3 | 2091.1840 | 2091.1948 | 0.0108  | 0       | 5.16   | 2.922 | 0.307 | 933.8 | 1  | 32 | 80  | 2 | 0 | 1 |
| Q5V3G2_HALMA       | 1      | Flavin-containing amine-oxidoreductase                                                  | <i>aor3</i>     | mmAC0970 | 344  | 22.7 | 3 | 3 | 0.9986 | K | ADDGRVTELVTETLPTGLVDIEEPPVYAFDR     | Q | 3 | 3448.6885 | 3449.7080 | 1.0195  | -1.0034 | 4.68   | 3.554 | 0.237 | 318.7 | 5  | 26 | 120 | 2 | 1 | 1 |
| Q5V3G2_HALMA       | 1      | Flavin-containing amine-oxidoreductase                                                  | <i>aor3</i>     | mmAC0970 | 344  | 22.7 | 3 | 3 | 0.9999 | K | RLFNADADVENGVRVERLER                | T | 4 | 2486.2626 | 2486.2678 | 0.0052  | 0       | 2.09   | 3.639 | 0.249 | 1369  | 1  | 37 | 120 | 2 | 2 | 1 |
| Q5V3G2_HALMA       | 1      | Flavin-containing amine-oxidoreductase                                                  | <i>aor3</i>     | mmAC0970 | 344  | 22.7 | 3 | 3 | 1      | R | TDIDGTGRDADEHKWTYEAGITQVAK          | Q | 4 | 2818.3522 | 2819.3709 | 1.0187  | -1.0034 | 5.45   | 4.728 | 0.336 | 2692  | 1  | 52 | 150 | 2 | 2 | 1 |
| Q5V4B5_HALMA       | 1      | Hypothetical protein                                                                    | <i>rmAC0629</i> | mmAC0629 | 257  | 19.8 | 2 | 3 | 1      | R | EGMSLDSPTLIEGLPGVGLVGK              | I | 2 | 2226.1453 | 2226.1521 | 0.0068  | 0       | 3.05   | 4.757 | 0.572 | 1445  | 1  | 25 | 42  | 2 | 0 | 1 |
| Q5V4B5_HALMA       | 1      | Hypothetical protein                                                                    | <i>rmAC0629</i> | mmAC0629 | 257  | 19.8 | 2 | 3 | 1      | R | ALLQTAISPLADFDIDTEALVEQAEIEGR       | A | 3 | 3127.5925 | 3127.6026 | 0.0101  | 0       | 3.23   | 4.575 | 0.446 | 669.1 | 1  | 30 | 112 | 2 | 0 | 1 |
| Q5V4B5_HALMA       | 1      | Hypothetical protein                                                                    | <i>rmAC0629</i> | mmAC0629 | 257  | 19.8 | 2 | 3 | 0.9836 | R | ALLQTAISPLADFDIDTEALVEQAEIEGR       | A | 3 | 3127.5925 | 3128.6182 | 1.0257  | -1.0034 | 7.15   | 3.067 | 0.112 | 601.6 | 1  | 27 | 112 | 2 | 0 | 1 |
| Q5V4E9_HALMA       | 1      | Hypothetical protein                                                                    | <i>rmAC0592</i> | mmAC0592 | 169  | 22.5 | 3 | 3 | 0.9999 | M | STTLTPDESAAEFHIESFGK                | T | 2 | 2192.0525 | 2192.0635 | 0.0110  | 0       | 5.02   | 3.382 | 0.494 | 891.8 | 1  | 17 | 38  | 1 | 0 | 1 |
| Q5V4E9_HALMA       | 1      | Hypothetical protein                                                                    | <i>rmAC0592</i> | mmAC0592 | 169  | 22.5 | 3 | 3 | 0.9998 | G | SQFLFLDDDDFTTLVEHVYKR               | R | 4 | 2162.1008 | 2162.1004 | -0.0004 | 0       | -0.19  | 3.655 | 0.363 | 1455  | 1  | 39 | 102 | 1 | 0 | 1 |
| Q5V517_HALMA       | 1      | 3-isopropylmalate dehydratase small subunit (EC 4.2.1.33)                               | <i>leuD</i>     | mmAC0336 | 214  | 23.8 | 2 | 3 | 1      | R | AETVTYTGNEINVSVDNR                  | A | 2 | 1880.8752 | 1880.8810 | 0.0058  | 0       | 3.08   | 3.877 | 0.537 | 2290  | 1  | 25 | 32  | 2 | 0 | 1 |
| Q5V517_HALMA       | 1      | 3-isopropylmalate dehydratase small subunit (EC 4.2.1.33)                               | <i>leuD</i>     | mmAC0336 | 214  | 23.8 | 2 | 3 | 1      | M | SDATEDIPEVDYVEGSGPIPHGNDIDTDQIIPAR  | F | 3 | 3650.7224 | 3651.7407 | 1.0183  | -1.0034 | 4.10   | 5.057 | 0.577 | 872.8 | 1  | 44 | 132 | 2 | 0 | 1 |
| Q5V517_HALMA       | 1      | 3-isopropylmalate dehydratase small subunit (EC 4.2.1.33)                               | <i>leuD</i>     | mmAC0336 | 214  | 23.8 | 2 | 3 | 1      | M | SDATEDIPEVDYVEGSGPIPHGNDIDTDQIIPAR  | F | 3 | 3650.7224 | 3650.7283 | 0.0059  | 0       | 1.62   | 4.864 | 0.563 | 828.9 | 1  | 46 | 132 | 2 | 0 | 1 |
| Q5V5C7_HALMA       | 1      | Hypothetical protein                                                                    | <i>rmAC0216</i> | mmAC0216 | 73   | 89   | 4 | 3 | 1      | R | NAETTYDFDDMEVDVPSKAGEDAEHAR         | W | 3 | 3023.3090 | 3023.3135 | 0.0045  | 0       | 1.49   | 5.167 | 0.466 | 1588  | 1  | 43 | 104 | 2 | 1 | 1 |
| Q5V5C7_HALMA       | 1      | Hypothetical protein                                                                    | <i>rmAC0216</i> | mmAC0216 | 73   | 89   | 4 | 3 | 1      | R | NAETTYDFDDMEVDVPSK                  | A | 2 | 2086.9041 | 2086.9126 | 0.0085  | 0       | 4.07   | 3.314 | 0.281 | 569.8 | 1  | 18 | 34  | 2 | 0 | 1 |
| Q5V5C7_HALMA       | 1      | Hypothetical protein                                                                    | <i>rmAC0216</i> | mmAC0216 | 73   | 89   | 4 | 3 | 0.9675 | R | WRVDGTLTITTR                        | D | 3 | 1417.7677 | 1417.7687 | 0.0010  | 0       | 0.71   | 2.427 | 0.069 | 845.8 | 9  | 20 | 44  | 2 | 1 | 1 |
| Q5V675_HALMA       | 1      | Putative pyridine nucleotide-disulphide oxidoreductase                                  | <i>pNG7279</i>  | pNG7279  | 199  | 38.7 | 3 | 3 | 0.9995 | R | TQVDSFGVNR                          | K | 2 | 1121.5465 | 1121.5469 | 0.0004  | 0       | 0.36   | 1.874 | 0.268 | 758.3 | 1  | 14 | 18  | 2 | 0 | 1 |
| Q5V675_HALMA       | 1      | Putative pyridine nucleotide-disulphide oxidoreductase                                  | <i>pNG7279</i>  | pNG7279  | 199  | 38.7 | 3 | 3 | 0.9989 | M | TDVLIVGGGPAGLSAAALFAQK              | N | 2 | 1984.0993 | 1985.5254 | 1.4261  | -1.0034 | 213.07 | 4.647 | 0.383 | 2079  | 1  | 26 | 40  | 1 | 0 | 1 |
| Q5V6S4_HALMA       | 1      | Formamidase                                                                             | <i>fmnA</i>     | pNG7060  | 433  | 11.5 | 3 | 3 | 0.9993 | M | PETKFEVDVDSAPDEQPGANPNFR            | W | 3 | 2658.2198 | 2660.2281 | 2.0083  | -2.0067 | 0.60   | 5.505 | 0.376 | 1615  | 1  | 38 | 92  | 1 | 1 | 1 |
| Q5V6S4_HALMA       | 1      | Formamidase                                                                             | <i>fmnA</i>     | pNG7060  | 433  | 11.5 | 3 | 3 | 0.9999 | D | PDEAEAAEVAAR                        | T | 2 | 1356.6157 | 1356.6153 | -0.0004 | 0       | -0.29  | 4.441 | 0.406 | 1917  | 1  | 21 | 24  | 1 | 0 | 1 |
| Q5V7B8_HALMA       | 1      | Putative DEAD/H helicase                                                                | <i>pNG6185</i>  | pNG6185  | 1212 | 2.8  | 3 | 3 | 1      | R | TALQEFDVDDL                         | Q | 2 | 1305.6565 | 1305.6654 | 0.0089  | 0       | 6.82   | 2.625 | 0.358 | 1868  | 1  | 17 | 20  | 2 | 0 | 1 |
| Q5V7B8_HALMA       | 1      | Putative DEAD/H helicase                                                                | <i>pNG6185</i>  | pNG6185  | 1212 | 2.8  | 3 | 3 | 0.9611 | R | LAGYLSLR                            | S | 2 | 891.5178  | 891.5254  | 0.0076  | 0       | 8.52   | 1.551 | 0.054 | 494.9 | 1  | 13 | 14  | 2 | 0 | 1 |
| Q5V7B8_HALMA       | 1      | Putative DEAD/H helicase                                                                | <i>pNG6185</i>  | pNG6185  | 1212 | 2.8  | 3 | 3 | 0.9008 | K | QATVVEPAVTSSEVK                     | N | 2 | 1543.8093 | 1543.8150 | 0.0057  | 0       | 3.69   | 1.868 | 0.03  | 292.7 | 18 | 13 | 28  | 2 | 0 | 1 |
| Q5V7Q7_HALMA       | 1      | Hypothetical protein                                                                    | <i>pNG5104</i>  | pNG5104  | 371  | 15.1 | 3 | 3 | 0.9999 | R | HLGVDPQGRPDSIEAIEDLKQSR             | I | 4 | 2559.3041 | 2559.3064 | 0.0023  | 0       | 0.90   | 2.274 | 0.225 | 600.9 | 1  | 35 | 132 | 2 | 1 | 1 |
| Q5V7Q7_HALMA       | 1      | Hypothetical protein                                                                    | <i>pNG5104</i>  | pNG5104  | 371  | 15.1 | 3 | 3 | 0.9153 | R | HLGVDPQGRPDSIEAIEDLK                | Q | 3 | 2188.1124 | 2187.1109 | -1.0015 | 1       | -9.83  | 2.74  | 0.16  | 510.1 | 3  | 24 | 76  | 2 | 0 | 1 |
| Q5V7Q7_HALMA       | 1      | Hypothetical protein                                                                    | <i>pNG5104</i>  | pNG5104  | 371  | 15.1 | 3 | 3 | 1      | R | IQPDTLEQLASDVLSAYGYDVNPSGTQGTDAGR   | D | 2 | 3437.6223 | 3438.6387 | 1.0164  | -1.0034 | 3.80   | 4.247 | 0.497 | 558.9 | 1  | 18 | 64  | 2 | 0 | 1 |
| SURE_HALMARReview  | 1      | 5'-nucleotidase surE (EC 3.1.3.5) (Nucleoside 5'-monophosphatephosphohydrolase)         | <i>surE</i>     | mmAC0514 | 269  | 22.7 | 3 | 3 | 0.9999 | K | VSVSPLTAPHTTHEHEALDAIAETYPEPDGGEEAA | D | 3 | 3529.6121 | 3529.6328 | 0.0207  | 0       | 5.86   | 4.415 | 0.441 | 875.2 | 1  | 35 | 132 | 1 | 0 | 1 |
| SURE_HALMARReview  | 1      | 5'-nucleotidase surE (EC 3.1.3.5) (Nucleoside 5'-monophosphatephosphohydrolase)         | <i>surE</i>     | mmAC0514 | 269  | 22.7 | 3 | 3 | 1      | R | AVYDGLSTVGDTVAVAPAEQSAVGR           | A | 2 | 2547.2452 | 2547.2429 | -0.0023 | 0       | -0.90  | 4.005 | 0.462 | 687.4 | 1  | 22 | 50  | 2 | 0 | 1 |
| Y3100_HALMARReview | 1      | UPF0447 protein rmAC3100                                                                | <i>rmAC3100</i> | mmAC3100 | 669  | 6    | 3 | 3 | 0.9915 | K | RRQPDQNWYDTSFEERAHHKR               | H | 5 | 2802.3698 | 2803.3635 | 0.9937  | -1.0034 | -3.44  | 3.359 | 0.081 | 1174  | 3  | 43 | 168 | 2 | 2 | 1 |
| Y3100_HALMARReview | 1      | UPF0447 protein rmAC3100                                                                | <i>rmAC3100</i> | mmAC3100 | 669  | 6    | 3 | 3 | 1      | R | FDPSTSQAEFGFPVYVGR                  | K | 2 | 2050.9425 | 2050.9448 | 0.0023  | 0       | 1.12   | 4.357 | 0.539 | 1410  | 1  | 22 | 34  | 2 | 0 | 1 |
| Y3100_HALMARReview | 1      | UPF0447 protein rmAC3100                                                                | <i>rmAC3100</i> | mmAC3100 | 669  | 6    | 3 | 3 | 0.9994 | R | RQPDQNWYDTSFEER                     | A | 3 | 1969.8554 | 1969.8595 | 0.0041  | 0       | 2.08   | 2.921 | 0.2   | 589.7 | 4  | 20 | 56  | 2 | 0 | 1 |
| GUAAA_HALMARReview | 0.9999 | GMP synthase [glutamine-hydrolyzing] subunit A (EC 6.3.5.2) (Glutamineamidotransferase) | <i>guaAA</i>    | mmAC1694 | 189  | 19   | 2 | 3 | 0.9985 | R | VWASHADEVKEVPPGFER                  | T | 4 | 2052.0065 | 2052.0086 | 0.0021  | 0       | 1.02   | 2.867 | 0.136 | 1082  | 2  | 33 | 102 | 2 | 1 | 1 |
| GUAAA_HALMARReview | 0.9999 | GMP synthase [glutamine-hydrolyzing] subunit A (EC 6.3.5.2) (Glutamineamidotransferase) | <i>guaAA</i>    | mmAC1694 | 189  | 19   | 2 | 3 | 1      | R | VWASHADEVKEVPPGFER                  | T | 4 | 2052.0065 | 2052.0083 | 0.0018  | 0       | 0.88   | 3.444 | 0.351 | 1413  | 1  | 38 | 102 | 2 | 1 | 1 |
| Q5UW79_HALMA       | 0.9999 | 3-ketoacyl-CoA thiolase (EC 2.3.1.9)                                                    | <i>acaB1</i>    | rmB0309  | 389  | 16.7 | 3 | 3 | 0.9946 | R | SGITAPSQYALLGOR                     | Y | 2 | 1560.8260 | 1562.7600 | 1.9340  | -2.0067 | -46.58 | 2.512 | 0.243 | 569.1 | 2  | 15 | 28  | 2 | 0 | 1 |
| Q5UW79_HALMA       | 0.9999 | 3-ketoacyl-CoA thiolase (EC 2.3.1.9)                                                    | <i>acaB1</i>    | rmB0309  | 389  | 16.7 | 3 | 3 | 1      | R | GHPIGATGLLQALEAYEQLTGGAGDR          | A | 3 | 2594.3088 | 2596.3281 | 2.0193  | -2.0067 | 4.86   | 3.584 | 0.357 | 1426  |    |    |     |   |   |   |

|                   |        |                                                                                   |                 |          |     |      |   |   |        |   |                                                |   |   |           |           |         |         |         |       |       |       |     |    |     |   |   |   |
|-------------------|--------|-----------------------------------------------------------------------------------|-----------------|----------|-----|------|---|---|--------|---|------------------------------------------------|---|---|-----------|-----------|---------|---------|---------|-------|-------|-------|-----|----|-----|---|---|---|
| Q5V5M4_HALMA      | 0.9974 | 2-nitropropane dioxygenase-related protein                                        | <i>npd</i>      | rmAC0102 | 337 | 13.9 | 2 | 3 | 1      | R | FADMPPLAGMTGDVEALPHYAGQSTGLAQDVRPAGEVVAR       | L | 4 | 4093.9990 | 4094.0237 | 0.0247  | 0       | 6.03    | 2.486 | 0.358 | 339.3 | 1   | 41 | 234 | 2 | 0 | 1 |
| END4_HALMARReview | 0.9973 | Probable endonuclease 4 (EC 3.1.21.2) (Endonuclease IV)(Endodeoxyribonuclease IV) | <i>nfo</i>      | rmAC2015 | 277 | 7.2  | 2 | 3 | 0.9994 | K | SFAWNIER                                       | V | 2 | 1021.4981 | 1021.4996 | 0.0015  | 0       | 1.47    | 1.995 | 0.215 | 892   | 1   | 13 | 14  | 2 | 0 | 1 |
| END4_HALMARReview | 0.9973 | Probable endonuclease 4 (EC 3.1.21.2) (Endonuclease IV)(Endodeoxyribonuclease IV) | <i>nfo</i>      | rmAC2015 | 277 | 7.2  | 2 | 3 | 0.9998 | K | SFAWNIER                                       | V | 2 | 1021.4981 | 1021.4965 | -0.0016 | 0       | -1.57   | 2.246 | 0.234 | 910.4 | 1   | 13 | 14  | 2 | 0 | 1 |
| Q5V1Q6_HALMA      | 0.9971 | Hypothetical protein                                                              | <i>rmAC1632</i> | rmAC1632 | 143 | 28.7 | 2 | 3 | 1      | K | SLAISAATDLVAIEAAGDSETVLR                       | V | 2 | 2443.2806 | 2444.3054 | 1.0248  | -1.0034 | 8.78    | 3.817 | 0.526 | 495.8 | 1   | 17 | 48  | 2 | 0 | 1 |
| Q5V3D2_HALMA      | 0.9960 | Inositol-1-monophosphatase (EC 3.1.3.25)                                          | <i>subB1</i>    | rmAC1004 | 279 | 12.5 | 2 | 3 | 1      | R | AGPEADREPEAVDSVPDSGSLWVIDPIDGTANYVR            | G | 3 | 3696.7543 | 3698.7681 | 2.0138  | -2.0067 | 1.92    | 7.036 | 0.512 | 2043  | 1   | 47 | 136 | 2 | 1 | 1 |
| Q5V3D2_HALMA      | 0.9960 | Inositol-1-monophosphatase (EC 3.1.3.25)                                          | <i>subB1</i>    | rmAC1004 | 279 | 12.5 | 2 | 3 | 1      | R | AGPEADREPEAVDSVPDSGSLWVIDPIDGTANYVR            | G | 3 | 3696.7543 | 3696.6577 | -0.0966 | 0       | -26.13  | 5.756 | 0.23  | 1149  | 1   | 37 | 136 | 2 | 1 | 1 |
| Q5V3D2_HALMA      | 0.9960 | Inositol-1-monophosphatase (EC 3.1.3.25)                                          | <i>subB1</i>    | rmAC1004 | 279 | 12.5 | 2 | 3 | 1      | R | AGPEADREPEAVDSVPDSGSLWVIDPIDGTANYVR            | G | 3 | 3696.7543 | 3698.7681 | 2.0138  | -2.0067 | 1.92    | 6.635 | 0.401 | 1862  | 1   | 47 | 136 | 2 | 1 | 1 |
| Q5V5K3_HALMA      | 0.9960 | 3-phosphoshikimate 1-carboxyvinyltransferase (EC 2.5.1.19)                        | <i>aroA</i>     | rmAC0127 | 429 | 10.3 | 2 | 3 | 0.9957 | R | LVTATAALQDDLAVLTDGESLR                         | S | 2 | 2271.1958 | 2271.1931 | -0.0027 | 0       | -1.19   | 2.254 | 0.164 | 226.2 | 11  | 12 | 42  | 2 | 0 | 1 |
| Q5V5K3_HALMA      | 0.9960 | 3-phosphoshikimate 1-carboxyvinyltransferase (EC 2.5.1.19)                        | <i>aroA</i>     | rmAC0127 | 429 | 10.3 | 2 | 3 | 1      | R | LVTATAALQDDLAVLTDGESLR                         | S | 2 | 2271.1958 | 2272.2254 | 1.0296  | -1.0034 | 11.56   | 4.069 | 0.352 | 729.6 | 1   | 18 | 42  | 2 | 0 | 1 |
| Q5V5K3_HALMA      | 0.9960 | 3-phosphoshikimate 1-carboxyvinyltransferase (EC 2.5.1.19)                        | <i>aroA</i>     | rmAC0127 | 429 | 10.3 | 2 | 3 | 1      | R | LVTATAALQDDLAVLTDGESLR                         | S | 2 | 2271.1958 | 2272.2053 | 1.0095  | -1.0034 | 2.71    | 4.687 | 0.586 | 1647  | 1   | 25 | 42  | 2 | 0 | 1 |
| Q5V131_HALMA      | 0.9956 | Putative DNA binding                                                              | <i>rmAC1895</i> | rmAC1895 | 214 | 7.5  | 3 | 3 | 0.9999 | R | LGYFTVPR                                       | G | 2 | 951.5178  | 951.5254  | 0.0076  | 0       | 7.99    | 2.218 | 0.286 | 855.5 | 1   | 12 | 14  | 2 | 0 | 1 |
| Q5V131_HALMA      | 0.9956 | Putative DNA binding                                                              | <i>rmAC1895</i> | rmAC1895 | 214 | 7.5  | 3 | 3 | 0.9999 | R | LGYFTVPR                                       | G | 2 | 951.5178  | 951.5055  | -0.0123 | 0       | -12.93  | 2.116 | 0.309 | 1051  | 1   | 12 | 14  | 2 | 0 | 1 |
| Q5V131_HALMA      | 0.9956 | Putative DNA binding                                                              | <i>rmAC1895</i> | rmAC1895 | 214 | 7.5  | 3 | 3 | 0.9746 | R | LGYFTVPR                                       | G | 2 | 951.5178  | 951.5254  | 0.0076  | 0       | 7.99    | 1.648 | 0.222 | 230.8 | 446 | 9  | 14  | 2 | 0 | 1 |
| Q5UYT8_HALMA      | 0.9948 | Universal stress protein                                                          | <i>usp21</i>    | rmAC2809 | 147 | 31.3 | 2 | 3 | 0.9997 | - | MYDAVLVPTDGGSEGSATAAEHAIDLAQR                  | H | 3 | 2887.3658 | 2887.3711 | 0.0053  | 0       | 1.84    | 2.788 | 0.264 | 314.1 | 2   | 26 | 108 | 2 | 0 | 1 |
| Q5UYT8_HALMA      | 0.9948 | Universal stress protein                                                          | <i>usp21</i>    | rmAC2809 | 147 | 31.3 | 2 | 3 | 0.9723 | - | MYDAVLVPTDGGSEGSATAAEHAIDLAQR                  | H | 3 | 2887.3658 | 2887.3767 | 0.0109  | 0       | 3.78    | 2.164 | 0.187 | 140.8 | 253 | 20 | 108 | 2 | 0 | 1 |
| Q5V4S3_HALMA      | 0.9888 | Cytidine deaminase (EC 3.5.4.5)                                                   | <i>cdd</i>      | rmAC0446 | 128 | 21.1 | 2 | 3 | 0.9982 | - | MEDLLDAAR                                      | D | 2 | 1032.4910 | 1032.4917 | 0.0007  | 0       | 0.68    | 2.828 | 0.313 | 1221  | 1   | 15 | 16  | 2 | 0 | 1 |
| Q5V4S3_HALMA      | 0.9888 | Cytidine deaminase (EC 3.5.4.5)                                                   | <i>cdd</i>      | rmAC0446 | 128 | 21.1 | 2 | 3 | 0.9975 | - | MEDLLDAAR                                      | D | 2 | 1032.4910 | 1032.4914 | 0.0004  | 0       | 0.39    | 2.934 | 0.3   | 1170  | 4   | 15 | 16  | 2 | 0 | 1 |
| Q5V4S3_HALMA      | 0.9888 | Cytidine deaminase (EC 3.5.4.5)                                                   | <i>cdd</i>      | rmAC0446 | 128 | 21.1 | 2 | 3 | 0.9974 | - | MEDLLDAAR                                      | D | 2 | 1032.4910 | 1032.4916 | 0.0006  | 0       | 0.58    | 2.687 | 0.299 | 1190  | 1   | 15 | 16  | 2 | 0 | 1 |
| Q5UWK2_HALMA      | 0.9857 | Hypothetical protein                                                              | <i>rmB0163</i>  | rmB0163  | 216 | 4.2  | 1 | 3 | 1      | R | FLGLSTSAR                                      | Y | 2 | 950.5185  | 950.5254  | 0.0069  | 0       | 7.26    | 2.527 | 0.333 | 798.9 | 1   | 15 | 16  | 2 | 0 | 1 |
| Q5UWK2_HALMA      | 0.9857 | Hypothetical protein                                                              | <i>rmB0163</i>  | rmB0163  | 216 | 4.2  | 1 | 3 | 1      | R | FLGLSTSAR                                      | Y | 2 | 950.5185  | 950.5182  | -0.0003 | 0       | -0.32   | 2.571 | 0.295 | 812.7 | 1   | 15 | 16  | 2 | 0 | 1 |
| Q5UWK2_HALMA      | 0.9857 | Hypothetical protein                                                              | <i>rmB0163</i>  | rmB0163  | 216 | 4.2  | 1 | 3 | 1      | R | FLGLSTSAR                                      | Y | 2 | 950.5185  | 950.5196  | 0.0011  | 0       | 1.16    | 2.66  | 0.28  | 691.2 | 1   | 14 | 16  | 2 | 0 | 1 |
| Q5UY37_HALMA      | 0.9857 | Probable cysteine desulfurase (EC 4.4.1.-)                                        | <i>csd1</i>     | rmAC3104 | 415 | 3.4  | 1 | 3 | 1      | K | MAGPTGIGVLYGKK                                 | H | 3 | 1390.7642 | 1390.7719 | 0.0077  | 0       | 5.54    | 2.556 | 0.373 | 467.6 | 2   | 26 | 52  | 2 | 0 | 1 |
| Q5UY37_HALMA      | 0.9857 | Probable cysteine desulfurase (EC 4.4.1.-)                                        | <i>csd1</i>     | rmAC3104 | 415 | 3.4  | 1 | 3 | 1      | K | MAGPTGIGVLYGKK                                 | H | 3 | 1390.7642 | 1390.7381 | -0.0261 | 0       | -18.77  | 2.92  | 0.293 | 447.5 | 2   | 25 | 52  | 2 | 0 | 1 |
| Q5UY37_HALMA      | 0.9857 | Probable cysteine desulfurase (EC 4.4.1.-)                                        | <i>csd1</i>     | rmAC3104 | 415 | 3.4  | 1 | 3 | 0.9973 | K | MAGPTGIGVLYGKK                                 | H | 3 | 1390.7642 | 1390.7659 | 0.0017  | 0       | 1.22    | 2.779 | 0.189 | 236.2 | 66  | 19 | 52  | 2 | 0 | 1 |
| Q5V6P4_HALMA      | 0.9857 | Hypothetical protein                                                              | <i>pNG7095</i>  | pNG7095  | 150 | 16   | 1 | 3 | 1      | M | SSDFQPLLGAELSDSVIDEVLTER                       | G | 2 | 2661.3021 | 2661.3094 | 0.0073  | 0       | 2.74    | 5.386 | 0.518 | 1995  | 1   | 28 | 46  | 2 | 0 | 1 |
| Q5V6P4_HALMA      | 0.9857 | Hypothetical protein                                                              | <i>pNG7095</i>  | pNG7095  | 150 | 16   | 1 | 3 | 1      | M | SSDFQPLLGAELSDSVIDEVLTER                       | G | 2 | 2661.3021 | 2661.3074 | 0.0053  | 0       | 1.99    | 5.539 | 0.551 | 1951  | 1   | 28 | 46  | 2 | 0 | 1 |
| Q5V6P4_HALMA      | 0.9857 | Hypothetical protein                                                              | <i>pNG7095</i>  | pNG7095  | 150 | 16   | 1 | 3 | 1      | M | SSDFQPLLGAELSDSVIDEVLTER                       | G | 2 | 2661.3021 | 2661.3103 | 0.0082  | 0       | 3.08    | 4.872 | 0.484 | 1553  | 1   | 25 | 46  | 2 | 0 | 1 |
| Q5V6R3_HALMA      | 0.9857 | 3-oxoacyl-[acyl-carrier protein] reductase 1 (EC 1.1.1.100)                       | <i>fabG7</i>    | pNG7072  | 221 | 3.6  | 1 | 3 | 0.9996 | K | KAVLQFTR                                       | T | 2 | 961.5709  | 961.5716  | 0.0007  | 0       | 0.73    | 2.135 | 0.207 | 795.8 | 1   | 13 | 14  | 2 | 0 | 1 |
| Q5V6R3_HALMA      | 0.9857 | 3-oxoacyl-[acyl-carrier protein] reductase 1 (EC 1.1.1.100)                       | <i>fabG7</i>    | pNG7072  | 221 | 3.6  | 1 | 3 | 1      | K | KAVLQFTR                                       | T | 2 | 961.5709  | 961.5725  | 0.0016  | 0       | 1.66    | 2.667 | 0.244 | 836   | 1   | 13 | 14  | 2 | 0 | 1 |
| Q5V6R3_HALMA      | 0.9857 | 3-oxoacyl-[acyl-carrier protein] reductase 1 (EC 1.1.1.100)                       | <i>fabG7</i>    | pNG7072  | 221 | 3.6  | 1 | 3 | 0.9995 | K | KAVLQFTR                                       | T | 2 | 961.5709  | 961.5655  | -0.0054 | 0       | -5.62   | 2.153 | 0.188 | 771   | 1   | 13 | 14  | 2 | 0 | 1 |
| Q5V7B2_HALMA      | 0.9857 | Hypothetical protein                                                              | <i>pNG6172</i>  | pNG6172  | 166 | 10.8 | 1 | 3 | 1      | R | FALLQDILGHPSSELP TLK                           | E | 3 | 1991.1091 | 1992.1110 | 1.0019  | -1.0034 | -0.73   | 4.539 | 0.377 | 1778  | 1   | 39 | 68  | 2 | 0 | 1 |
| Q5V7B2_HALMA      | 0.9857 | Hypothetical protein                                                              | <i>pNG6172</i>  | pNG6172  | 166 | 10.8 | 1 | 3 | 1      | R | FALLQDILGHPSSELP TLK                           | E | 3 | 1991.1091 | 1991.1112 | 0.0021  | 0       | 1.05    | 3.672 | 0.324 | 1663  | 1   | 36 | 68  | 2 | 0 | 1 |
| Q5V7B2_HALMA      | 0.9857 | Hypothetical protein                                                              | <i>pNG6172</i>  | pNG6172  | 166 | 10.8 | 1 | 3 | 1      | R | FALLQDILGHPSSELP TLK                           | E | 3 | 1991.1091 | 1991.1059 | -0.0032 | 0       | -1.61   | 4.494 | 0.405 | 1686  | 1   | 38 | 68  | 2 | 0 | 1 |
| Q5V1I2_HALMA      | 0.9828 | Cold shock protein                                                                | <i>cspD1</i>    | rmAC1715 | 64  | 87.5 | 1 | 3 | 0.9266 | M | ATGTVDFFNDTGGYGFHD TEDSD EDVFFH MEDIDGPDLEEGQE | A | 4 | 6289.6863 | 6291.7403 | 2.0540  | -2.0067 | 7.52    | 3.295 | 0.172 | 555.9 | 1   | 38 | 330 | 2 | 1 | 1 |
| Q5V1I2_HALMA      | 0.9828 | Cold shock protein                                                                | <i>cspD1</i>    | rmAC1715 | 64  | 87.5 | 1 | 3 | 0.9903 | M | ATGTVDFFNDTGGYGFHD TEDSD EDVFFH MEDIDGPDLEEGQE | A | 4 | 6289.6863 | 6291.7656 | 2.0793  | -2.0067 | 11.54   | 3.572 | 0.264 | 649.5 | 1   | 41 | 330 | 2 | 1 | 1 |
| Q5V462_HALMA      | 0.9828 | Aspartate aminotransferase (EC 2.6.1.1)                                           | <i>aspC4</i>    | rmAC0691 | 372 | 2.2  | 1 | 3 | 0.9998 | K | TMAITGFR                                       | V | 2 | 895.4585  | 895.4598  | 0.0013  | 0       | 1.45    | 2.167 | 0.255 | 515   | 1   | 11 | 14  | 2 | 0 | 1 |
| Q5V462_HALMA      | 0.9828 | Aspartate aminotransferase (EC 2.6.1.1)                                           | <i>aspC4</i>    | rmAC0691 | 372 | 2.2  | 1 | 3 | 0.9994 | K | TMAITGFR                                       | V | 2 | 895.4585  | 895.4586  | 0.0001  | 0       | 0.11    | 2.129 | 0.225 | 455.4 | 6   | 10 | 14  | 2 | 0 | 1 |
| Q5V3H7_HALMA      | 0.9800 | DNA helicase                                                                      | <i>hel</i>      | rmAC0954 | 911 | 2.5  | 2 | 3 | 0.9996 | R | VLLSAFTNR                                      | A | 2 | 1019.5764 | 1019.5655 | -0.0109 | 0       | -10.69  | 2.084 | 0.231 | 688.8 | 1   | 13 | 16  | 2 | 0 | 1 |
| Q5V3H7_HALMA      | 0.9800 | DNA helicase                                                                      | <i>hel</i>      | rmAC0954 | 911 | 2.5  | 2 | 3 | 0.9957 | R | VLLSAFTNR                                      | A | 2 | 1019.5764 | 1020.1255 | 0.5491  | -1.0034 | -445.53 | 2.03  | 0.226 | 844.4 | 1   | 14 | 16  | 2 | 0 | 1 |
| Q5UXR9_HALMA      | 0.9772 | Glucose-1-phosphate thymidyltransferase                                           | <i>graD4c</i>   | rmAC3232 | 396 | 3    | 1 | 3 | 0.9981 | R | DRVQDHFHGPTYR                                  | G | 3 | 1489.7062 | 1489.7080 | 0.0018  | 0       | 1.21    | 3.277 | 0.102 | 975.4 | 2   | 23 | 44  | 2 | 1 | 1 |
| Q5UXR9_HALMA      | 0.9772 | Glucose-1-phosphate thymidyltransferase                                           | <i>graD4c</i>   | rmAC3232 | 396 | 3    | 1 | 3 | 0.9994 | R | DRVQDHFHGPTYR                                  | G | 3 | 1489.7062 | 1489.7050 | -0.0012 | 0       | -0.81   | 3.024 | 0.159 | 1018  | 1   | 24 | 44  | 2 | 1 | 1 |
| Q5UXR9_HALMA      | 0.9772 | Glucose-1-phosphate thymidyltransferase                                           | <i>graD4c</i>   | rmAC3232 | 396 | 3    | 1 | 3 | 0.9980 | R | DRVQDHFHGPTYR                                  | G | 3 | 1489.7062 | 1489.7071 | 0.0009  | 0       | 0.60    | 2.807 | 0.127 | 849.9 | 1   | 22 | 44  | 2 | 1 | 1 |
| Q5V5U2_HALMA      | 0.9758 | Putative acetyltransferase                                                        | <i>hat7</i>     | rmAC0026 | 167 | 5.4  | 1 | 3 | 0.9732 | R | LYVHPDYRR                                      | E | 3 | 1217.6305 | 1217.6342 | 0.0037  | 0       | 3.04    | 1.753 | 0.169 | 271.2 | 56  | 13 | 32  | 2 | 0 | 1 |
| Q5V5U2_HALMA      | 0.9758 | Putative acetyltransferase                                                        | <i>hat7</i>     | rmAC0026 | 167 | 5.4  | 1 | 3 | 0.9993 | R | LYVHPDYRR                                      | E | 3 | 1217.6305 | 1217.6327 | 0.0022  | 0       | 1.81    | 1.673 | 0.321 | 340.3 | 6   | 15 | 32  | 2 | 0 | 1 |
| Q5V5U2_HALMA      | 0.9758 | Putative acetyltransferase                                                        | <i>hat7</i>     | rmAC0026 | 167 | 5.4  | 1 | 3 | 0.9880 | R | LYVHPDYRR                                      | E | 3 | 1217.6305 | 1217.6337 | 0.0032  | 0       | 2.63    | 1.787 | 0.174 | 267.9 | 10  | 13 | 32  | 2 | 0 | 1 |
| Q5V128_HALMA      | 0.9717 | Hypothetical protein                                                              | <i>rmAC1899</i> | rmAC1899 | 396 | 2.3  | 1 | 3 | 0.9466 | R | GLYDGGTLR                                      | A | 2 | 950.4821  | 950.4849  | 0.0028  | 0       | 2.95    | 1.672 | 0.063 | 652.4 | 8   | 11 | 16  | 2 | 0 | 1 |
| Q5V128_HALMA      | 0.9717 | Hypothetical protein                                                              | <i>rmAC1899</i> | rmAC1899 | 396 | 2.3  | 1 | 3 | 0.9990 | R | GLYDGGTLR                                      | A | 2 | 950.4821  | 950.4843  | 0.0022  | 0       | 2.31    | 2.36  | 0.115 | 1108  | 1   | 14 | 16  | 2 | 0 | 1 |
| Q5V128_HALMA      | 0.9717 | Hypothetical protein                                                              | <i>rmAC1899</i> | rmAC1899 | 396 | 2.3  | 1 | 3 | 0.9975 | R | GLYDGGTLR                                      | A | 2 | 950.4821  | 950.4872  | 0.0051  | 0       | 5.37    | 1.972 | 0.137 | 878.9 | 1   | 13 | 16  | 2 | 0 | 1 |
| Q5V623_HALMA      | 0.9464 |                                                                                   |                 |          |     |      |   |   |        |   |                                                |   |   |           |           |         |         |         |       |       |       |     |    |     |   |   |   |

|                   |        |                                                                                                      |                 |          |      |      |   |   |        |   |                                              |           |           |           |           |         |         |        |       |       |       |     |    |     |   |   |   |
|-------------------|--------|------------------------------------------------------------------------------------------------------|-----------------|----------|------|------|---|---|--------|---|----------------------------------------------|-----------|-----------|-----------|-----------|---------|---------|--------|-------|-------|-------|-----|----|-----|---|---|---|
| DP2L_HALMAReview  | 0.9999 | DNA polymerase II large subunit (EC 2.7.7.7) (Pol II) [Contains: HmapoIC intein (Hma pol II intein)] | <i>polC</i>     | rmAC2691 | 1395 | 2.2  | 2 | 2 | 0.9934 | R | SLERDWTREDLSEHAR                             | T         | 4         | 1998.9507 | 1998.9597 | 0.0090  | 0       | 4.50   | 2.354 | 0.079 | 737.8 | 2   | 27 | 90  | 2 | 2 | 1 |
| Q5UX49_HALMA      | 0.9999 | Molybdenum cofactor biosynthesis protein B                                                           | <i>moaB2</i>    | rmAC3480 | 321  | 12.8 | 2 | 2 | 1      | R | RGPTDGEDDETDDETRGDEESAADTDDEASSSDPTEAAD      | P         | 3         | 4272.6090 | 4273.5982 | 0.9892  | -1.0034 | -3.31  | 4.354 | 0.518 | 527.3 | 1   | 32 | 160 | 1 | 1 | 1 |
| Q5UX49_HALMA      | 0.9999 | Molybdenum cofactor biosynthesis protein B                                                           | <i>moaB2</i>    | rmAC3480 | 321  | 12.8 | 2 | 2 | 0.9944 | R | RGPTDGEDDETDDETRGDEESAADTDDEASSSD            | P         | 3         | 3688.3648 | 3689.3181 | 0.9533  | -1.0034 | -13.57 | 3.14  | 0.402 | 915.5 | 1   | 37 | 136 | 1 | 1 | 1 |
| Q5V1R8_HALMA      | 0.9999 | GTP-binding protein-like                                                                             | <i>gbp2</i>     | rmAC1619 | 543  | 5.9  | 2 | 2 | 0.9996 | K | AGLDALEDMEFALPK                              | T         | 2         | 1618.7912 | 1618.7965 | 0.0053  | 0       | 3.27   | 2.908 | 0.149 | 1806  | 1   | 21 | 28  | 2 | 0 | 1 |
| Q5V1R8_HALMA      | 0.9999 | GTP-binding protein-like                                                                             | <i>gbp2</i>     | rmAC1619 | 543  | 5.9  | 2 | 2 | 0.9987 | R | EGSSKGVGVTVTDPDAE                            | -         | 2         | 1648.7428 | 1648.7427 | -0.0001 | 0       | -0.06  | 2.48  | 0.262 | 561.8 | 1   | 14 | 32  | 2 | 1 | 1 |
| Q5V267_HALMA      | 0.9999 | Hypothetical protein                                                                                 | <i>rmAC1460</i> | rmAC1460 | 89   | 36   | 2 | 2 | 0.9983 | R | FRELGTGKEVEPEPSRLAEAVK                       | A         | 4         | 2313.2328 | 2313.2361 | 0.0033  | 0       | 1.43   | 3.968 | 0.235 | 696.1 | 5   | 34 | 114 | 2 | 3 | 1 |
| Q5V267_HALMA      | 0.9999 | Hypothetical protein                                                                                 | <i>rmAC1460</i> | rmAC1460 | 89   | 36   | 2 | 2 | 0.9990 | K | GVKEEELPVEER                                 | F         | 2         | 1412.7147 | 1412.7177 | 0.0030  | 0       | 2.12   | 2.772 | 0.21  | 742.9 | 1   | 15 | 22  | 2 | 1 | 1 |
| Q5V3W7_HALMA      | 0.9999 | SnRNP-like protein                                                                                   | <i>snp</i>      | rmAC0798 | 60   | 35   | 1 | 2 | 0.9951 | M | SGRPLDLVEASLGETVTVQLK                        | G         | 2         | 2211.2110 | 2211.2205 | 0.0095  | 0       | 4.30   | 3.243 | 0.276 | 699.5 | 1   | 21 | 40  | 2 | 0 | 1 |
| Q5V457_HALMA      | 0.9999 | Transcription antitermination protein NusG                                                           | <i>nusG</i>     | rmAC0698 | 145  | 55.2 | 2 | 2 | 0.9970 | R | IDEGKDQVTVELYEATVPVPTVRGDAQIR                | V         | 3         | 3239.7037 | 3240.7281 | 1.0244  | -1.0034 | 6.50   | 2.6   | 0.242 | 331.9 | 1   | 29 | 112 | 2 | 2 | 1 |
| Q5V457_HALMA      | 0.9999 | Transcription antitermination protein NusG                                                           | <i>nusG</i>     | rmAC0698 | 145  | 55.2 | 2 | 2 | 1      | R | ILDEIPHANGVVQGESSMAEVEHFLSPKPDVEGIAEGDIVELIA | A         | 5         | 5396.7126 | 5397.7686 | 1.0560  | -1.0034 | 9.76   | 5.58  | 0.38  | 1506  | 1   | 78 | 400 | 2 | 1 | 1 |
| Q5V469_HALMA      | 0.9999 | Hypothetical protein                                                                                 | <i>rmAC0682</i> | rmAC0682 | 146  | 24.7 | 2 | 2 | 0.9947 | K | SEVSHGAVSPGETYR                              | V         | 3         | 1574.7325 | 1575.7282 | 0.9957  | -1.0034 | -4.86  | 2.941 | 0.192 | 694.4 | 15  | 22 | 56  | 2 | 0 | 1 |
| Q5V469_HALMA      | 0.9999 | Hypothetical protein                                                                                 | <i>rmAC0682</i> | rmAC0682 | 146  | 24.7 | 2 | 2 | 1      | R | VGLLSQVDASASATAQPQTPK                        | Q         | 2         | 2068.0800 | 2068.0896 | 0.0096  | 0       | 4.64   | 4.103 | 0.421 | 1325  | 1   | 24 | 40  | 2 | 0 | 1 |
| Q5V521_HALMA      | 0.9999 | Acetolactate synthase small subunit (EC 2.2.1.6)                                                     | <i>ihvN</i>     | rmAC0331 | 199  | 12.1 | 2 | 2 | 0.9917 | H | R QAVLSALVK                                  | H         | 2         | 927.5753  | 927.5854  | 0.0101  | 0       | 10.89  | 1.728 | 0.221 | 183.3 | 42  | 11 | 16  | 2 | 0 | 1 |
| Q5V521_HALMA      | 0.9999 | Acetolactate synthase small subunit (EC 2.2.1.6)                                                     | <i>ihvN</i>     | rmAC0331 | 199  | 12.1 | 2 | 2 | 1      | K | HRPGVLSEVSALFSR                              | R         | 3         | 1653.8951 | 1653.8969 | 0.0018  | 0       | 1.09   | 4.098 | 0.261 | 1646  | 1   | 29 | 56  | 2 | 0 | 1 |
| Q5V5A2_HALMA      | 0.9999 | TRK potassium uptake system protein                                                                  | <i>trkA7</i>    | rmAC0243 | 217  | 22.6 | 2 | 2 | 0.9973 | K | VTVAPSAFVAGR                                 | R         | 2         | 1123.6349 | 1123.6344 | -0.0005 | 0       | -0.44  | 2.278 | 0.122 | 480.7 | 2   | 14 | 22  | 2 | 0 | 1 |
| Q5V5A2_HALMA      | 0.9999 | TRK potassium uptake system protein                                                                  | <i>trkA7</i>    | rmAC0243 | 217  | 22.6 | 2 | 2 | 1      | R | AETEADHEYDEVVDATLLPEYLGGDHAADLTGEDIR         | T         | 3         | 4041.8603 | 4122.8980 | 1.0377  | -1.0034 | 8.50   | 7.386 | 0.556 | 3143  | 1   | 53 | 144 | 2 | 0 | 1 |
| TOP6A_HALMAReview | 0.9999 | Type II DNA topoisomerase VI subunit A (EC 5.99.1.3)                                                 | <i>top6A</i>    | rmAC0459 | 368  | 11.1 | 2 | 2 | 0.9999 | - | 2                                            | 2310.1453 | 2312.1653 | 2.0200    | -2.0067   | 5.76    | 4.505   | 0.44   | 780.6 | 1     | 21    | 38  | 2  | 1   | 1 | 1 |   |
| TOP6A_HALMAReview | 0.9999 | Type II DNA topoisomerase VI subunit A (EC 5.99.1.3)                                                 | <i>top6A</i>    | rmAC0459 | 368  | 11.1 | 2 | 2 | 0.9933 | R | LHDELDLPTVTFDGGDPWSYR                        | I         | 3         | 2474.1754 | 2474.1844 | 0.0090  | 0       | 3.64   | 3.259 | 0.057 | 814.9 | 1   | 29 | 80  | 2 | 0 | 1 |
| Q5UZ64_HALMA      | 0.9998 | DNA repair protein                                                                                   | <i>rad24</i>    | rmAC2661 | 232  | 15.5 | 2 | 2 | 0.9998 | R | AAAYAVLDLADLTVEEHR                           | V         | 3         | 1884.9581 | 1884.9586 | 0.0005  | 0       | 0.27   | 2.499 | 0.317 | 570.9 | 19  | 20 | 64  | 2 | 0 | 1 |
| Q5UZ64_HALMA      | 0.9998 | DNA repair protein                                                                                   | <i>rad24</i>    | rmAC2661 | 232  | 15.5 | 2 | 2 | 0.9918 | R | VAYDTSVIDAVEDADLPR                           | Q         | 3         | 2018.9796 | 2019.9893 | 1.0097  | -1.0034 | 3.15   | 2.809 | 0.207 | 505.4 | 24  | 23 | 72  | 2 | 0 | 1 |
| Q5UZ80_HALMA      | 0.9998 | Hypothetical protein                                                                                 | <i>rmAC2641</i> | rmAC2641 | 305  | 8.5  | 1 | 2 | 0.9937 | R | DGAPVTEILAAVDEHPDDELLIGPHR                   | G         | 4         | 2778.3824 | 2778.3875 | 0.0051  | 0       | 1.84   | 1.497 | 0.141 | 342.3 | 6   | 42 | 150 | 2 | 0 | 1 |
| Q5UZ80_HALMA      | 0.9998 | Hypothetical protein                                                                                 | <i>rmAC2641</i> | rmAC2641 | 305  | 8.5  | 1 | 2 | 0.9994 | R | DGAPVTEILAAVDEHPDDELLIGPHR                   | G         | 3         | 2778.3824 | 2779.3880 | 1.0056  | -1.0034 | 0.81   | 3.022 | 0.269 | 485   | 1   | 29 | 100 | 2 | 0 | 1 |
| Q5UZZ1_HALMA      | 0.9998 | Hypothetical protein                                                                                 | <i>rmAC2340</i> | rmAC2340 | 246  | 6.1  | 1 | 2 | 0.9891 | R | ILAHYDRDAAPTVCQK                             | A         | 4         | 1696.8896 | 1696.8926 | 0.0030  | 0       | 1.77   | 2.483 | 0.111 | 580.6 | 9   | 33 | 84  | 2 | 1 | 1 |
| Q5UZZ1_HALMA      | 0.9998 | Hypothetical protein                                                                                 | <i>rmAC2340</i> | rmAC2340 | 246  | 6.1  | 1 | 2 | 0.9997 | R | ILAHYDRDAAPTVCQK                             | A         | 3         | 1696.8896 | 1696.8982 | 0.0086  | 0       | 5.07   | 2.891 | 0.218 | 1165  | 1   | 30 | 56  | 2 | 1 | 1 |
| Q5V591_HALMA      | 0.9998 | 5-methyltetrahydropteroyltylglutamate-homocysteine methyltransferase(EC 2.1.1.14)                    | <i>metE</i>     | rmAC0254 | 357  | 12.3 | 2 | 2 | 0.9868 | R | DQFKPADHPNDHFLTTVVGSYPKPK                    | W         | 3         | 2950.4977 | 2950.4268 | -0.0709 | 0       | -24.03 | 3.325 | 0.03  | 733.8 | 1   | 35 | 100 | 2 | 0 | 1 |
| Q5V591_HALMA      | 0.9998 | 5-methyltetrahydropteroyltylglutamate-homocysteine methyltransferase(EC 2.1.1.14)                    | <i>metE</i>     | rmAC0254 | 357  | 12.3 | 2 | 2 | 0.9999 | R | DQFKPADHPNDHFLTTVVGSYPKPK                    | W         | 4         | 2950.4977 | 2951.4910 | 0.9933  | -1.0034 | -3.41  | 3.425 | 0.314 | 1630  | 1   | 46 | 150 | 2 | 0 | 1 |
| Q5V4L1_HALMA      | 0.9997 | Hypothetical protein                                                                                 | <i>rmAC0521</i> | rmAC0521 | 270  | 16.3 | 2 | 2 | 0.9847 | R | IVALNTREDGNOQIVR                             | I         | 3         | 1825.9646 | 1825.9650 | 0.0004  | 0       | 0.22   | 2.014 | 0.144 | 324.7 | 2   | 22 | 60  | 2 | 1 | 1 |
| Q5V4L1_HALMA      | 0.9997 | Hypothetical protein                                                                                 | <i>rmAC0521</i> | rmAC0521 | 270  | 16.3 | 2 | 2 | 1      | R | LNAVLDTVTTDEEIQAYLEAQNINPVAR                 | K         | 3         | 3099.5724 | 3100.5982 | 1.0258  | -1.0034 | 7.24   | 4.874 | 0.402 | 880   | 1   | 32 | 108 | 2 | 0 | 1 |
| Q5UXX6_HALMA      | 0.9996 | Universal stress protein                                                                             | <i>usp19</i>    | rmAC3171 | 298  | 9.7  | 3 | 2 | 0.9981 | R | LLVTTDGSSENADTATR                            | H         | 2         | 1662.8060 | 1662.7995 | -0.0065 | 0       | -3.91  | 2.029 | 0.19  | 389.4 | 1   | 15 | 30  | 2 | 0 | 1 |
| Q5UXX6_HALMA      | 0.9996 | Universal stress protein                                                                             | <i>usp19</i>    | rmAC3171 | 298  | 9.7  | 3 | 2 | 0.9912 | R | LLGGVTEQVLIHR                                | T         | 3         | 1320.7514 | 1320.7528 | 0.0014  | 0       | 1.06   | 2.164 | 0.179 | 252.3 | 42  | 18 | 44  | 2 | 0 | 1 |
| Q5V177_HALMA      | 0.9996 | Structural maintenance of chromosomes                                                                | <i>smc1</i>     | rmAC1840 | 908  | 1.7  | 2 | 2 | 0.9928 | R | RITELLR                                      | M         | 2         | 899.5552  | 899.5655  | 0.0103  | 0       | 11.45  | 2.469 | 0.046 | 501.6 | 63  | 10 | 12  | 2 | 0 | 1 |
| Q5V177_HALMA      | 0.9996 | Structural maintenance of chromosomes                                                                | <i>smc1</i>     | rmAC1840 | 908  | 1.7  | 2 | 2 | 0.9980 | R | ALFNLRLR                                     | C         | 2         | 932.5443  | 932.5454  | 0.0011  | 0       | 1.18   | 1.603 | 0.234 | 443   | 1   | 11 | 14  | 2 | 0 | 1 |
| Q5V7W3_HALMA      | 0.9994 | Hypothetical protein                                                                                 | <i>pNG4044</i>  | pNG4044  | 79   | 64.6 | 2 | 2 | 1      | K | RLDQVLVDGYLHER                               | Q         | 3         | 1727.8591 | 1727.8627 | 0.0036  | 0       | 2.08   | 4.43  | 0.349 | 2436  | 1   | 28 | 52  | 2 | 0 | 1 |
| Q5V7W3_HALMA      | 0.9994 | Hypothetical protein                                                                                 | <i>pNG4044</i>  | pNG4044  | 79   | 64.6 | 2 | 2 | 0.9629 | R | RVSDTEILQEVALAPGPIVTAPELADRLDSMGTGVNK        | R         | 3         | 3834.9197 | 3834.9236 | 0.0039  | 0       | 1.02   | 2.815 | 0.087 | 172   | 24  | 22 | 144 | 2 | 1 | 1 |
| Q5V7R3_HALMA      | 0.9993 | Hypothetical protein                                                                                 | <i>pNG5109</i>  | pNG5109  | 326  | 5.5  | 2 | 2 | 0.9994 | K | WVIETAR                                      | K         | 2         | 986.5549  | 986.5454  | -0.0095 | 0       | -9.63  | 2.364 | 0.129 | 781.1 | 1   | 13 | 14  | 2 | 0 | 1 |
| Q5V7R3_HALMA      | 0.9993 | Hypothetical protein                                                                                 | <i>pNG5109</i>  | pNG5109  | 326  | 5.5  | 2 | 2 | 0.9701 | K | RYEYEGISS                                    | -         | 2         | 1189.5251 | 1189.5248 | -0.0003 | 0       | -0.25  | 1.726 | 0.141 | 154.4 | 38  | 8  | 18  | 2 | 0 | 1 |
| Q5V893_HALMA      | 0.9993 | Putative helicase                                                                                    | <i>pNG1040</i>  | pNG1040  | 862  | 5.5  | 3 | 2 | 0.9542 | R | VVPVPRQDYDRNPSEGQINTINR                      | W         | 4         | 2829.4158 | 2829.4217 | 0.0059  | 0       | 2.09   | 2.838 | 0.144 | 511.4 | 135 | 30 | 138 | 2 | 2 | 1 |
| Q5V893_HALMA      | 0.9993 | Putative helicase                                                                                    | <i>pNG1040</i>  | pNG1040  | 862  | 5.5  | 3 | 2 | 1      | K | SLDPAVLTDLLIGR                               | E         | 2         | 1481.8453 | 1481.8499 | 0.0046  | 0       | 3.10   | 4.176 | 0.374 | 1688  | 1   | 21 | 26  | 2 | 0 | 1 |
| RL11_HALMAReview  | 0.9992 | 50S ribosomal protein L11P (Hmal11)                                                                  | <i>rlp11p</i>   | rmAC1414 | 162  | 12.3 | 1 | 2 | 0.9420 | K | QLAEQKHFDLLSYDLTNAAK                         | R         | 2         | 2254.1593 | 2255.1653 | 1.0060  | -1.0034 | 1.18   | 2.161 | 0.291 | 145.8 | 24  | 11 | 38  | 2 | 1 | 1 |
| RL11_HALMAReview  | 0.9992 | 50S ribosomal protein L11P (Hmal11)                                                                  | <i>rlp11p</i>   | rmAC1414 | 162  | 12.3 | 1 | 2 | 1      | K | QLAEQKHFDLLSYDLTNAAK                         | E         | 3         | 2254.1593 | 2254.1646 | 0.0053  | 0       | 2.35   | 3.942 | 0.424 | 1071  | 1   | 30 | 76  | 2 | 1 | 1 |
| Q5UY55_HALMA      | 0.9991 | Hypothetical protein                                                                                 | <i>rmAC3083</i> | rmAC3083 | 140  | 37.1 | 2 | 2 | 0.9604 | R | NFQIQMHGSGAIAEIEDREESVTR                     | L         | 3         | 2983.4458 | 2984.4680 | 1.0222  | -1.0034 | 6.32   | 2.513 | 0.128 | 376.1 | 1   | 29 | 104 | 2 | 1 | 1 |
| Q5UY55_HALMA      | 0.9991 | Hypothetical protein                                                                                 | <i>rmAC3083</i> | rmAC3083 | 140  | 37.1 | 2 | 2 | 0.9995 | R | TGMEQQEGMSGSGSGMSPSPFGESR                    | G         | 2         | 2487.0100 | 2487.0054 | -0.0046 | 0       | -1.85  | 2.171 | 0.249 | 608.6 | 1   | 18 | 48  | 2 | 0 | 1 |
| Q5V3K0_HALMA      | 0.9991 | Hypothetical protein                                                                                 | <i>rmAC0928</i> | rmAC0928 | 65   | 40   | 1 | 2 | 0.9363 | K | SYNPVTDHEVLQMVEPEPALSGEPQR                   | I         | 3         | 2937.3859 | 2938.3821 | 0.9962  | -1.0034 | -2.43  | 2.966 | 0.114 | 389.1 | 31  | 23 | 100 | 2 | 0 | 1 |
| Q5V3K0_HALMA      | 0.9991 | Hypothetical protein                                                                                 | <i>rmAC0928</i> | rmAC0928 | 65   | 40   | 1 | 2 | 1      | K | SYNPVTDHEVLQMVEPEPALSGEPQR                   | I         | 3         | 2921.3865 | 2921.3855 | -0.0010 | 0       | -0.34  | 3.939 | 0.383 | 947.4 | 1   | 32 | 100 | 2 | 0 | 1 |
| UVRB_HALMAReview  | 0.9991 | UvrABC system protein B (Protein uvrB) (Excinuclease ABC subunit B)                                  | <i>uvrB</i>     | rmAC2996 | 686  | 4.5  | 2 | 2 | 0.9604 | R | AIDEIEKLLDQR                                 | I         | 3         | 1441.7776 | 1442.7764 | 0.9988  | -1.0034 | -3.16  | 2.498 | 0.153 | 365.1 | 34  | 17 | 46  | 2 | 1 | 1 |
| UVRB_HALMAReview  | 0.9991 | UvrABC system protein B (Protein uvrB) (Excinuclease ABC subunit B)                                  | <i>uvrB</i>     | rmAC2996 | 686  | 4.5  | 2 | 2 | 0.9994 | K | TETTGISSDGSADAEATR                           | Q         | 2         | 1838.7766 | 1839.7930 | 1.0164  | -1.0034 | 7.10   | 2.831 | 0.278 | 638.7 | 1   | 19 | 34  | 2 | 0 | 1 |
| Q5UYYY_HALMA      | 0.9990 | Hypothetical protein                                                                                 | <i>rmAC2754</i> | rmAC2754 | 138  | 23.9 | 2 | 2 | 1      | K | HTNDIEHEQVVLAGR                              | Y         | 3         | 1780.8492 | 1780.8512 | 0.0020  | 0       | 1.12   | 3.824 | 0.422 | 1306  | 1   | 27 | 56  | 2 | 0 | 1 |
| Q5UYYY_HALMA      | 0.9990 | Hypothetical protein                                                                                 | <i>rmAC2754</i> | rmAC2754 | 138  | 23.9 | 2 | 2 | 0.9275 | R | SADDAIYEAVDAADGLEK                           | G         | 3         | 1920.9065 | 1920.9124 | 0.0059  | 0       | 3.07   | 2.654 |       |       |     |    |     |   |   |   |

|                  |        |                                                                                  |                 |          |     |      |   |   |        |   |                               |           |           |           |           |         |         |        |       |       |       |    |    |     |   |   |   |
|------------------|--------|----------------------------------------------------------------------------------|-----------------|----------|-----|------|---|---|--------|---|-------------------------------|-----------|-----------|-----------|-----------|---------|---------|--------|-------|-------|-------|----|----|-----|---|---|---|
| Q5UYJ9_HALMA     | 0.9857 | Acetyltransferase-like                                                           | <i>yval</i>     | mmAC2914 | 301 | 6.3  | 1 | 2 | 0.9998 | K | SIAGKDIPAHHVAAGTPAK           | S         | 3         | 1839.9955 | 1839.9970 | 0.0015  | 0       | 0.82   | 2.555 | 0.277 | 750.8 | 1  | 27 | 72  | 2 | 1 | 1 |
| Q5UZD5_HALMA     | 0.9857 | Hypothetical protein                                                             | <i>rmAC2575</i> | mmAC2575 | 194 | 13.9 | 1 | 2 | 1      | R | YVSAPDDLSGIVSEAEITFLQEHHDGKLR | V         | 4         | 2975.4512 | 2975.4663 | 0.0151  | 0       | 5.07   | 3.329 | 0.406 | 746   | 1  | 45 | 156 | 2 | 1 | 1 |
| Q5UZD5_HALMA     | 0.9857 | Hypothetical protein                                                             | <i>rmAC2575</i> | mmAC2575 | 194 | 13.9 | 1 | 2 | 1      | R | YVSAPDDLSGIVSEAEITFLQEHHDGKLR | V         | 4         | 2975.4512 | 2975.4660 | 0.0088  | 0       | 2.96   | 3.378 | 0.358 | 1057  | 1  | 50 | 156 | 2 | 1 | 1 |
| Q5UZD6_HALMA     | 0.9857 | Phosphoglucomutase/phosphomannomutase (EC 5.4.2.2) (EC 5.4.2.8)                  | <i>manB1</i>    | mmAC2574 | 450 | 2.4  | 1 | 2 | 1      | R | VDLGDAAWLLR                   | A         | 2         | 1303.6924 | 1303.7053 | 0.0129  | 0       | 9.89   | 3.476 | 0.379 | 2080  | 1  | 18 | 20  | 2 | 0 | 1 |
| Q5UZD6_HALMA     | 0.9857 | Phosphoglucomutase/phosphomannomutase (EC 5.4.2.2) (EC 5.4.2.8)                  | <i>manB1</i>    | mmAC2574 | 450 | 2.4  | 1 | 2 | 1      | R | VDLGDAAWLLR                   | A         | 2         | 1303.6924 | 1303.6933 | 0.0009  | 0       | 0.69   | 4.365 | 0.432 | 2147  | 1  | 18 | 20  | 2 | 0 | 1 |
| Q5UZL4_HALMA     | 0.9857 | Enoyl-CoA hydratase (EC 4.2.1.17)                                                | <i>ech3</i>     | mmAC2484 | 224 | 5.4  | 1 | 2 | 1      | K | LGLFGAWGGTAR                  | L         | 2         | 1204.6353 | 1204.6454 | 0.0101  | 0       | 8.38   | 1.339 | 0.384 | 1501  | 1  | 19 | 22  | 2 | 0 | 1 |
| Q5UZL4_HALMA     | 0.9857 | Enoyl-CoA hydratase (EC 4.2.1.17)                                                | <i>ech3</i>     | mmAC2484 | 224 | 5.4  | 1 | 2 | 1      | K | LGLFGAWGGTAR                  | L         | 2         | 1204.6353 | 1204.6399 | 0.0046  | 0       | 3.82   | 3.445 | 0.341 | 1691  | 1  | 20 | 22  | 2 | 0 | 1 |
| Q5V0U1_HALMA     | 0.9857 | Aminotransferase class V                                                         | <i>spaT</i>     | mmAC1999 | 402 | 6.5  | 1 | 2 | 1      | K | AMSTPLVGHLDPSFIEMDEVQNLLR     | Y         | 3         | 2924.4776 | 2924.4937 | 0.0161  | 0       | 5.51   | 3.833 | 0.286 | 585.9 | 1  | 25 | 100 | 2 | 0 | 1 |
| Q5V0U1_HALMA     | 0.9857 | Aminotransferase class V                                                         | <i>spaT</i>     | mmAC1999 | 402 | 6.5  | 1 | 2 | 0.9999 | K | AMSTPLVGHLDPSFIEMDEVQNLLR     | Y         | 3         | 2924.4776 | 2924.4771 | -0.0005 | 0       | -0.17  | 3.396 | 0.241 | 795.5 | 1  | 28 | 100 | 2 | 0 | 1 |
| Q5V0X8_HALMA     | 0.9857 | 4-alpha-glucanotransferase (EC 2.4.1.25)                                         | <i>malQ</i>     | mmAC1957 | 556 | 1.6  | 1 | 2 | 1      | R | LFLDVDIAR                     | I         | 2         | 1060.5917 | 1060.5934 | 0.0017  | 0       | 1.60   | 3.006 | 0.292 | 1130  | 1  | 15 | 16  | 2 | 0 | 1 |
| Q5V0X8_HALMA     | 0.9857 | 4-alpha-glucanotransferase (EC 2.4.1.25)                                         | <i>malQ</i>     | mmAC1957 | 556 | 1.6  | 1 | 2 | 1      | R | LFLDVDIAR                     | I         | 2         | 1060.5917 | 1060.5911 | -0.0006 | 0       | -0.57  | 2.924 | 0.34  | 1131  | 2  | 15 | 16  | 2 | 0 | 1 |
| Q5V164_HALMA     | 0.9857 | Hypothetical protein                                                             | <i>rmAC1854</i> | mmAC1854 | 144 | 16.7 | 1 | 2 | 1      | K | IEGRYPVTIAEYALLHSHIEGEKR      | -         | 5         | 2780.4609 | 2780.5017 | 0.0408  | 0       | 14.67  | 4.886 | 0.466 | 1869  | 1  | 56 | 184 | 2 | 1 | 1 |
| Q5V164_HALMA     | 0.9857 | Hypothetical protein                                                             | <i>rmAC1854</i> | mmAC1854 | 144 | 16.7 | 1 | 2 | 0.9999 | K | IEGRYPVTIAEYALLHSHIEGEKR      | -         | 5         | 2780.4609 | 2780.4627 | 0.0018  | 0       | 0.65   | 3.621 | 0.206 | 1853  | 1  | 61 | 184 | 2 | 1 | 1 |
| Q5V232_HALMA     | 0.9857 | Glycine dehydrogenase subunit 1 (EC 1.4.4.2)                                     | <i>gcvP1</i>    | mmAC1498 | 447 | 4.3  | 1 | 2 | 1      | R | DLADRLDDIVGVGTAPIHGR          | H         | 3         | 2032.0701 | 2032.0751 | 0.0050  | 0       | 2.46   | 5.043 | 0.425 | 1594  | 1  | 33 | 72  | 2 | 1 | 1 |
| Q5V232_HALMA     | 0.9857 | Glycine dehydrogenase subunit 1 (EC 1.4.4.2)                                     | <i>gcvP1</i>    | mmAC1498 | 447 | 4.3  | 1 | 2 | 1      | R | DLADRLDDIVGVGTAPIHGR          | H         | 3         | 2032.0701 | 2032.0763 | 0.0062  | 0       | 3.05   | 4.798 | 0.423 | 1718  | 1  | 36 | 72  | 2 | 1 | 1 |
| Q5V316_HALMA     | 0.9857 | 25-diamino-6-hydroxy-4-(5-phosphoribosylamino)pyrimidine 1-reductase(EC 1.1.1.-) | <i>ribG</i>     | mmAC1131 | 219 | 5    | 1 | 2 | 0.9976 | R | VDDGVVLHWQF                   | -         | 2         | 1313.6404 | 1313.6454 | 0.0050  | 0       | 3.81   | 1.883 | 0.178 | 641.6 | 1  | 14 | 20  | 2 | 0 | 1 |
| Q5V316_HALMA     | 0.9857 | 25-diamino-6-hydroxy-4-(5-phosphoribosylamino)pyrimidine 1-reductase(EC 1.1.1.-) | <i>ribG</i>     | mmAC1131 | 219 | 5    | 1 | 2 | 1      | R | VDDGVVLHWQF                   | -         | 2         | 1313.6404 | 1313.6454 | 0.0050  | 0       | 3.81   | 3.216 | 0.394 | 704   | 1  | 14 | 20  | 2 | 0 | 1 |
| Q5V415_HALMA     | 0.9857 | Hypothetical protein                                                             | <i>rmAC0744</i> | mmAC0744 | 488 | 2.9  | 1 | 2 | 1      | R | SPPPDSIASAAALR                | A         | 2         | 1369.6837 | 1369.9654 | 0.2817  | 0       | 205.67 | 3.382 | 0.486 | 1677  | 1  | 22 | 26  | 2 | 0 | 1 |
| Q5V415_HALMA     | 0.9857 | Hypothetical protein                                                             | <i>rmAC0744</i> | mmAC0744 | 488 | 2.9  | 1 | 2 | 1      | R | SPPPDSIASAAALR                | A         | 2         | 1369.6837 | 1369.6853 | 0.0016  | 0       | 1.17   | 2.887 | 0.452 | 1849  | 1  | 22 | 26  | 2 | 0 | 1 |
| Q5V484_HALMA     | 0.9857 | Hypothetical protein                                                             | <i>rmAC0664</i> | mmAC0664 | 159 | 8.2  | 1 | 2 | 0.9999 | R | SLADKGIVETVEK                 | T         | 2         | 1387.7558 | 1387.7594 | 0.0036  | 0       | 2.59   | 3.484 | 0.311 | 1234  | 1  | 18 | 24  | 2 | 1 | 1 |
| Q5V484_HALMA     | 0.9857 | Hypothetical protein                                                             | <i>rmAC0664</i> | mmAC0664 | 159 | 8.2  | 1 | 2 | 1      | R | SLADKGIVETVEK                 | T         | 2         | 1387.7558 | 1387.7575 | 0.0017  | 0       | 1.22   | 3.672 | 0.4   | 1454  | 1  | 19 | 24  | 2 | 1 | 1 |
| Q5V4U2_HALMA     | 0.9857 | Putative sulfatase                                                               | <i>rmAC0426</i> | mmAC0426 | 487 | 10.7 | 2 | 2 | 1      | K | TLASYLWNIR                    | S         | 2         | 1235.6662 | 1235.6707 | 0.0045  | 0       | 3.64   | 2.724 | 0.325 | 1268  | 1  | 15 | 18  | 2 | 0 | 1 |
| Q5V4U2_HALMA     | 0.9857 | Putative sulfatase                                                               | <i>rmAC0426</i> | mmAC0426 | 487 | 10.7 | 2 | 2 | 1      | K | TLASYLWNIR                    | S         | 2         | 1235.6662 | 1235.6645 | -0.0017 | 0       | -1.38  | 2.87  | 0.423 | 1375  | 1  | 16 | 18  | 2 | 0 | 1 |
| Q5V4U7_HALMA     | 0.9857 | Sugar-specific transcriptional regulator                                         | <i>tmmB2</i>    | mmAC0420 | 280 | 10   | 1 | 2 | 0.9997 | M | SDPADVFDLVGLTEYEATALEQLLSLGR  | T         | 2         | 3021.5182 | 3022.5359 | 1.0177  | -1.0034 | 4.75   | 3.879 | 0.539 | 794.6 | 1  | 21 | 54  | 2 | 0 | 1 |
| Q5V4U7_HALMA     | 0.9857 | Sugar-specific transcriptional regulator                                         | <i>tmmB2</i>    | mmAC0420 | 280 | 10   | 1 | 2 | 1      | M | SDPADVFDLVGLTEYEATALEQLLSLGR  | T         | 2         | 3021.5182 | 3021.5391 | 0.0209  | 0       | 6.92   | 4.516 | 0.524 | 826.5 | 1  | 21 | 54  | 2 | 0 | 1 |
| Q5V527_HALMA     | 0.9857 | Hypothetical protein                                                             | <i>rmAC0325</i> | mmAC0325 | 226 | 9.7  | 1 | 2 | 1      | R | VLVGHGGDGVMEDAAEAIDYALR       | G         | 3         | 2300.1107 | 2300.1148 | 0.0041  | 0       | 1.78   | 3.477 | 0.333 | 893.7 | 1  | 26 | 84  | 2 | 0 | 1 |
| Q5V527_HALMA     | 0.9857 | Hypothetical protein                                                             | <i>rmAC0325</i> | mmAC0325 | 226 | 9.7  | 1 | 2 | 1      | R | VLVGHGGDGVMEDAAEAIDYALR       | G         | 3         | 2300.1107 | 2300.1153 | 0.0046  | 0       | 2.00   | 3.552 | 0.363 | 1212  | 1  | 30 | 84  | 2 | 0 | 1 |
| Q5V5A0_HALMA     | 0.9857 | Trk potassium uptake system protein                                              | <i>trkA4</i>    | mmAC0245 | 217 | 8.3  | 1 | 2 | 1      | R | YVIAVEPDVVDEVLNLMR            | G         | 2         | 2073.0816 | 2073.0904 | 0.0088  | 0       | 4.24   | 5.793 | 0.555 | 1860  | 1  | 28 | 34  | 2 | 0 | 1 |
| Q5V5A0_HALMA     | 0.9857 | Trk potassium uptake system protein                                              | <i>trkA4</i>    | mmAC0245 | 217 | 8.3  | 1 | 2 | 1      | R | YVIAVEPDVVDEVLNLMR            | G         | 2         | 2073.0816 | 2073.0926 | 0.0110  | 0       | 5.31   | 3.439 | 0.476 | 1272  | 1  | 24 | 34  | 2 | 0 | 1 |
| Q5V6U4_HALMA     | 0.9857 | Transcription regulator                                                          | <i>trh2</i>     | pNG7038  | 157 | 13.4 | 1 | 2 | 0.9998 | M | ADEEIDDVDRAILYALQEDAR         | N         | 3         | 2419.1503 | 2419.1614 | 0.0111  | 0       | 4.59   | 4.314 | 0.405 | 1323  | 1  | 31 | 80  | 2 | 1 | 1 |
| Q5V6U4_HALMA     | 0.9857 | Transcription regulator                                                          | <i>trh2</i>     | pNG7038  | 157 | 13.4 | 1 | 2 | 0.9978 | M | ADEEIDDVDRAILYALQEDAR         | N         | 3         | 2419.1503 | 2419.1568 | 0.0065  | 0       | 2.69   | 3.888 | 0.316 | 1638  | 1  | 34 | 80  | 2 | 1 | 1 |
| Q5V830_HALMA     | 0.9857 | Hypothetical protein                                                             | <i>pNG2029</i>  | pNG2029  | 129 | 13.2 | 1 | 2 | 1      | R | TMQNILSDLVDNGDLFK             | V         | 2         | 1921.9455 | 1921.9483 | 0.0028  | 0       | 1.46   | 3.327 | 0.404 | 757.2 | 1  | 16 | 32  | 2 | 0 | 1 |
| Q5V830_HALMA     | 0.9857 | Hypothetical protein                                                             | <i>pNG2029</i>  | pNG2029  | 129 | 13.2 | 1 | 2 | 0.9949 | R | TMQNILSDLVDNGDLFK             | V         | 2         | 1921.9455 | 1921.9497 | 0.0042  | 0       | 2.19   | 1.986 | 0.135 | 170   | 1  | 13 | 32  | 2 | 0 | 1 |
| RL2_HALMAReview  | 0.9857 | 50S ribosomal protein L2P (Hmal2) (H14)                                          | <i>rpI2p</i>    | mmAC1608 | 240 | 8.8  | 1 | 2 | 1      | R | KVEDGDVIAGTVVDIEHDPAR         | S         | 3         | 2234.1179 | 2234.1216 | 0.0037  | 0       | 1.66   | 6.352 | 0.473 | 2213  | 1  | 38 | 80  | 2 | 0 | 1 |
| RL2_HALMAReview  | 0.9857 | 50S ribosomal protein L2P (Hmal2) (H14)                                          | <i>rpI2p</i>    | mmAC1608 | 240 | 8.8  | 1 | 2 | 1      | R | KVEDGDVIAGTVVDIEHDPAR         | S         | 3         | 2234.1179 | 2234.1236 | 0.0057  | 0       | 2.55   | 6.128 | 0.467 | 2502  | 1  | 39 | 80  | 2 | 0 | 1 |
| TRPD_HALMAReview | 0.9857 | Anthranilate phosphoribosyltransferase (EC 2.4.2.18)                             | <i>trpD</i>     | mmAC1520 | 331 | 6.9  | 1 | 2 | 1      | R | AVATTVFEDATEAQIGALLTALR       | A         | 3         | 2360.2257 | 2360.2600 | 0.0013  | 0       | 0.55   | 4.098 | 0.292 | 1492  | 1  | 33 | 88  | 2 | 0 | 1 |
| TRPD_HALMAReview | 0.9857 | Anthranilate phosphoribosyltransferase (EC 2.4.2.18)                             | <i>trpD</i>     | mmAC1520 | 331 | 6.9  | 1 | 2 | 1      | R | AVATTVFEDATEAQIGALLTALR       | A         | 3         | 2360.2587 | 2360.2654 | 0.0067  | 0       | 2.84   | 3.582 | 0.344 | 1338  | 1  | 31 | 88  | 2 | 0 | 1 |
| Q5UZ54_HALMA     | 0.9842 | Ornithine carbamoyltransferase (EC 2.1.3.3)                                      | <i>arcB</i>     | mmAC2672 | 298 | 2.7  | 1 | 2 | 0.9999 | V | 2                             | 1013.5004 | 1013.5041 | 0.0037    | 0         | 3.65    | 2.466   | 0.22   | 847.7 | 1     | 13    | 14 | 2  | 0   | 1 |   |   |
| Q5UZ54_HALMA     | 0.9842 | Ornithine carbamoyltransferase (EC 2.1.3.3)                                      | <i>arcB</i>     | mmAC2672 | 298 | 2.7  | 1 | 2 | 0.9998 | R | YVDFIMAR                      | V         | 2         | 1013.5004 | 1013.4981 | -0.0023 | 0       | -2.27  | 2.325 | 0.205 | 861.5 | 1  | 13 | 14  | 2 | 0 | 1 |
| Q5V004_HALMA     | 0.9842 | Replication factor C                                                             | <i>repC</i>     | mmAC2325 | 626 | 1.3  | 1 | 2 | 0.9985 | V | 2                             | 1035.5138 | 1035.5054 | -0.0084   | 0         | -8.11   | 1.956   | 0.249  | 249.3 | 26    | 10    | 14 | 2  | 0   | 1 |   |   |
| Q5V004_HALMA     | 0.9842 | Replication factor C                                                             | <i>repC</i>     | mmAC2325 | 626 | 1.3  | 1 | 2 | 0.9999 | R | NSFOYIHK                      | V         | 2         | 1035.5138 | 1035.5054 | -0.0084 | 0       | -8.11  | 2.108 | 0.313 | 400.6 | 2  | 11 | 14  | 2 | 0 | 1 |
| Q5V0W7_HALMA     | 0.9842 | Hypothetical protein                                                             | <i>rmAC1968</i> | mmAC1968 | 432 | 3.5  | 1 | 2 | 0.9828 | R | IDDIVETVVADIRDR               | G         | 3         | 1727.9053 | 1727.9181 | 0.0128  | 0       | 7.41   | 2.49  | 0.13  | 474.8 | 27 | 20 | 56  | 2 | 1 | 1 |
| Q5V0W7_HALMA     | 0.9842 | Hypothetical protein                                                             | <i>rmAC1968</i> | mmAC1968 | 432 | 3.5  | 1 | 2 | 0.9999 | G | 3                             | 1727.9053 | 1727.9068 | 0.0015    | 0         | 0.87    | 2.84    | 0.294  | 605   | 1     | 26    | 56 | 2  | 1   | 1 |   |   |
| Q5V4A9_HALMA     | 0.9842 | Lactoylglytathione lyase and related lyases                                      | <i>gloA2</i>    | mmAC0635 | 129 | 9.3  | 1 | 2 | 0.9999 | K | TTGGVLVELVEH                  | -         | 2         | 1252.6663 | 1252.6704 | 0.0041  | 0       | 3.27   | 2.382 | 0.317 | 957.8 | 1  | 18 | 22  | 2 | 0 | 1 |
| Q5V4A9_HALMA     | 0.9842 | Lactoylglytathione lyase and related lyases                                      | <i>gloA2</i>    | mmAC0635 | 129 | 9.3  | 1 | 2 | 0.9932 | - | 2                             | 1252.6663 | 1252.6654 | -0.0009   | 0         | -0.72   | 2.047   | 0.116  | 594.7 | 3     | 14    | 22 | 2  | 0   | 1 |   |   |
| Q5V565_HALMA     | 0.9842 | Hypothetical protein                                                             | <i>rmAC0281</i> | mmAC0281 | 79  | 10.1 | 1 | 2 | 0.9996 | K | GAFYVYYR                      | D         | 2         | 973.5021  | 974.5055  | 1.0034  | -1.0034 | 0.05   | 2.771 | 0.226 | 876.6 | 1  | 11 | 14  | 2 | 0 | 1 |
| Q5V565_HALMA     | 0.9842 | Hypothetical protein                                                             | <i>rmAC0281</i> | mmAC0281 | 79  | 10.1 | 1 | 2 | 0.9999 | K | GAFYVYYR                      | D         | 2         | 973.5021  | 973.5015  | -0.0006 | 0       | -0.62  | 2.338 | 0.28  | 1003  | 1  | 12 | 14  | 2 | 0 | 1 |
| Q5V7D8_HALMA     | 0.9842 | Hypothetical protein                                                             | <i>pNG6003</i>  | pNG6003  | 447 | 3.6  | 1 | 2 | 0.9999 | R | VYNNYNNEAFPIKLHER             | K         | 4         | 2006.0010 | 2006.0028 | 0.0018  | 0       | 0.90   | 3.705 | 0.221 | 1528  | 1  | 36 | 90  | 2 | 1 | 1 |
| Q5V7D8_HALMA     | 0.9842 | Hypothetical protein                                                             | <i>pNG6003</i>  | pNG6003  | 447 | 3.6  | 1 | 2 | 0.9881 | R | VYNNYNNEAFPIKLHER             | K         | 4         | 2006.0010 | 2006.0044 | 0.0034  | 0       | 1.69</ |       |       |       |    |    |     |   |   |   |

|              |        |                                                               |                 |          |      |      |   |   |        |   |                                            |           |           |           |           |         |         |         |       |       |       |    |    |     |   |   |   |
|--------------|--------|---------------------------------------------------------------|-----------------|----------|------|------|---|---|--------|---|--------------------------------------------|-----------|-----------|-----------|-----------|---------|---------|---------|-------|-------|-------|----|----|-----|---|---|---|
| Q5UXT8_HALMA | 0.9857 | Hypothetical protein                                          | <i>rmAC3212</i> | mmAC3212 | 155  | 20.6 | 1 | 1 | 1      | R | AGEGEVHVLTVPDETAEEATDVVEDEATLSR            | A         | 3         | 3338.5637 | 3340.5596 | 1.9959  | -2.0067 | -3.23   | 4.272 | 0.327 | 1291  | 1  | 34 | 124 | 2 | 0 | 1 |
| Q5UXY9_HALMA | 0.9857 | V-type ATP synthase subunit F (EC 3.6.3.14)                   | <i>atpF</i>     | mmAC3158 | 107  | 15.9 | 1 | 1 | 0.9977 | M | SQEIAVIGSPFEITGFR                          | L         | 2         | 1837.9210 | 1838.9253 | 1.0043  | -1.0034 | 0.52    | 4.259 | 0.368 | 921.8 | 1  | 18 | 32  | 2 | 0 | 1 |
| Q5UXZ5_HALMA | 0.9857 | Ubiquinone/menaquinone biosynthesis methyltransferase         | <i>ubiE1</i>    | mmAC3151 | 206  | 9.2  | 1 | 1 | 1      | K | AGYEFEHGHQTSRPGSPR                         | A         | 3         | 2224.0409 | 2224.0435 | 0.0026  | 0       | 1.17    | 3.985 | 0.416 | 632.4 | 1  | 27 | 72  | 2 | 0 | 1 |
| Q5UY02_HALMA | 0.9857 | Hypothetical protein                                          | <i>rmAC3144</i> | mmAC3144 | 140  | 9.3  | 1 | 1 | 1      | R | IEAPVNVDETETDR                             | V         | 2         | 1457.6998 | 1457.7053 | 0.0055  | 0       | 3.77    | 2.891 | 0.403 | 932.8 | 1  | 18 | 24  | 2 | 0 | 1 |
| Q5UYD4_HALMA | 0.9857 | Hypothetical protein                                          | <i>rmAC2988</i> | mmAC2988 | 225  | 6.2  | 1 | 1 | 1      | R | IHVAMGHIAPTAAK                             | H         | 3         | 1415.7707 | 1415.7715 | 0.0008  | 0       | 0.57    | 2.635 | 0.318 | 675.9 | 1  | 23 | 52  | 2 | 0 | 1 |
| Q5UYK7_HALMA | 0.9857 | Putative nonsense mediated mRNA decay protein                 | <i>nmd3</i>     | mmAC2903 | 379  | 5.3  | 1 | 1 | 1      | R | LATGEDYEASFEAGETPDAR                       | D         | 2         | 2127.9232 | 2127.9253 | 0.0021  | 0       | 0.99    | 3.464 | 0.482 | 936.6 | 1  | 19 | 38  | 2 | 0 | 1 |
| Q5UYR8_HALMA | 0.9857 | Hypothetical protein                                          | <i>rmAC2831</i> | mmAC2831 | 136  | 14.7 | 1 | 1 | 1      | R | TLSDVNDPAATLTADLLAALR                      | R         | 2         | 2025.1106 | 2025.1250 | 0.0144  | 0       | 7.11    | 5.011 | 0.565 | 1851  | 1  | 24 | 38  | 2 | 0 | 1 |
| Q5UYZ3_HALMA | 0.9857 | Hypothetical protein                                          | <i>rmAC2746</i> | mmAC2746 | 142  | 14.1 | 1 | 1 | 0.9989 | M | ATDIDATGHHFGHIVSNLDR                       | A         | 3         | 2151.0709 | 2151.0789 | 0.0080  | 0       | 3.72    | 4.354 | 0.304 | 1564  | 1  | 32 | 76  | 2 | 0 | 1 |
| Q5UZ95_HALMA | 0.9857 | CHEA histidine kinase                                         | <i>cheA2</i>    | mmAC2623 | 214  | 9.8  | 1 | 1 | 1      | K | EGSGTVAEINLQQLTGLDATVR                     | T         | 2         | 2087.0494 | 2087.0550 | 0.0056  | 0       | 2.68    | 4.699 | 0.472 | 2334  | 1  | 26 | 40  | 2 | 0 | 1 |
| Q5UZC8_HALMA | 0.9857 | Hypothetical protein                                          | <i>rmAC2582</i> | mmAC2582 | 289  | 8    | 1 | 1 | 1      | K | VTEAVEAAEGVDVADETGEDTDAK                   | T         | 2         | 2305.0445 | 2306.0655 | 1.0210  | -1.0034 | 7.66    | 5.63  | 0.564 | 2904  | 1  | 29 | 44  | 2 | 0 | 1 |
| Q5UZE2_HALMA | 0.9857 | Hypothetical protein                                          | <i>rmAC2567</i> | mmAC2567 | 150  | 22.7 | 1 | 1 | 1      | R | LGESSEGVLAALADGDDAYAFPVFHHYEDGSLYFR        | L         | 4         | 3746.7165 | 3747.7310 | 1.0145  | -1.0034 | 2.98    | 5.492 | 0.424 | 1034  | 1  | 40 | 198 | 2 | 0 | 1 |
| Q5UZFI_HALMA | 0.9857 | Hypothetical protein                                          | <i>rmAC2554</i> | mmAC2554 | 167  | 13.8 | 1 | 1 | 1      | R | AADESGIVSTVTSIAJDHGISIR                    | Q         | 3         | 2269.1550 | 2269.1621 | 0.0071  | 0       | 3.13    | 4.671 | 0.558 | 1097  | 1  | 34 | 88  | 2 | 0 | 1 |
| Q5UZM1_HALMA | 0.9857 | Protein kinase                                                | <i>prk2</i>     | mmAC2476 | 193  | 4.7  | 1 | 1 | 1      | R | TPEPIAVER                                  | N         | 2         | 1010.5396 | 1010.5406 | 0.0010  | 0       | 0.99    | 2.481 | 0.394 | 733.6 | 1  | 14 | 16  | 2 | 0 | 1 |
| Q5UZN3_HALMA | 0.9857 | Sterol carrier protein                                        | <i>scp2</i>     | mmAC2463 | 136  | 15.4 | 1 | 1 | 1      | R | RQDTIAEMVAAAQNVDTFEFH                      | -         | 3         | 2374.0859 | 2374.0943 | 0.0084  | 0       | 3.54    | 4.129 | 0.395 | 2107  | 1  | 38 | 80  | 2 | 0 | 1 |
| Q5UZX8_HALMA | 0.9857 | Glutathione S-transferase                                     | <i>gstI</i>     | mmAC2356 | 416  | 5.8  | 1 | 1 | 1      | R | RVTPVVLWDKQEETIVNNESEILR                   | M         | 3         | 2839.4603 | 2839.4732 | 0.0129  | 0       | 4.54    | 4.238 | 0.247 | 1020  | 1  | 28 | 92  | 2 | 1 | 1 |
| Q5V005_HALMA | 0.9857 | Hypothetical protein                                          | <i>rmAC2324</i> | mmAC2324 | 124  | 13.7 | 1 | 1 | 1      | R | QSEVEDELADVLFLFLR                          | F         | 3         | 2022.0309 | 2023.0281 | 0.9972  | -1.0034 | -3.04   | 3.661 | 0.312 | 976.7 | 1  | 25 | 64  | 2 | 0 | 1 |
| Q5V006_HALMA | 0.9857 | Hypothetical protein                                          | <i>rmAC2323</i> | mmAC2323 | 202  | 9.4  | 1 | 1 | 1      | K | LVESDFDQPTGLLGLYYEK                        | N         | 2         | 2186.0783 | 2186.1023 | 0.0240  | 0       | 10.98   | 3.591 | 0.473 | 1137  | 1  | 20 | 36  | 2 | 0 | 1 |
| Q5V023_HALMA | 0.9857 | Hypothetical protein                                          | <i>rmAC2306</i> | mmAC2306 | 115  | 18.3 | 1 | 1 | 1      | R | MEALESIAIEGGADYTEL.TGR                     | F         | 2         | 2183.0052 | 2183.0022 | -0.0030 | 0       | -1.37   | 5.808 | 0.547 | 3756  | 1  | 32 | 40  | 2 | 0 | 1 |
| Q5V0K9_HALMA | 0.9857 | MCP domain signal transducer                                  | <i>htr</i>      | mmAC2091 | 328  | 8.2  | 1 | 1 | 1      | R | GQGNADDVHEAMENYQQAADSVaedVK                | T         | 3         | 2840.2519 | 2841.2520 | 1.0001  | -1.0034 | -1.14   | 4.471 | 0.458 | 1859  | 1  | 36 | 104 | 2 | 0 | 1 |
| Q5V0L2_HALMA | 0.9857 | Hypothetical protein                                          | <i>rmAC2088</i> | mmAC2088 | 303  | 7.3  | 1 | 1 | 1      | R | LVDTLFLAALVHPDLFETPPR                      | D         | 3         | 2492.3315 | 2492.3379 | 0.0064  | 0       | 2.57    | 4.504 | 0.407 | 1400  | 1  | 35 | 84  | 2 | 0 | 1 |
| Q5V116_HALMA | 0.9857 | ATP-dependent protease LA (EC 3.4.21.53)                      | <i>lon</i>      | mmAC1914 | 709  | 4.2  | 1 | 1 | 0.9983 | M | SDNTDTDATPDPDREASDAGEEASTNGAK              | Q         | 3         | 3065.2453 | 3066.2481 | 1.0028  | -1.0034 | -0.18   | 3.812 | 0.438 | 275.1 | 4  | 24 | 116 | 2 | 1 | 1 |
| Q5V184_HALMA | 0.9857 | DNA polymerase B elongation subunit (EC 2.7.7.7)              | <i>polB1</i>    | mmAC1831 | 1388 | 0.9  | 1 | 1 | 1      | K | KLNDYDTDTAQVR                              | G         | 2         | 1537.7372 | 1537.7439 | 0.0067  | 0       | 4.36    | 3.576 | 0.313 | 1781  | 1  | 20 | 24  | 2 | 0 | 1 |
| Q5V190_HALMA | 0.9857 | Iron-dependent repressor                                      | <i>idr</i>      | mmAC1825 | 144  | 27.1 | 1 | 1 | 1      | K | AIYLTQQQEDPGPSTGDVADM.LDVPASANEMIGKLESR    | G         | 3         | 4106.9412 | 4107.9751 | 1.0339  | -1.0034 | 7.44    | 5.438 | 0.434 | 1505  | 1  | 43 | 152 | 2 | 1 | 1 |
| Q5V1B7_HALMA | 0.9857 | Diaminopimelate epimerase (EC 5.1.1.7)                        | <i>dapF</i>     | mmAC1794 | 303  | 6.3  | 1 | 1 | 1      | D | 3                                          | 2104.0225 | 2104.0296 | 0.0071    | 0         | 3.37    | 4.412   | 0.406   | 1527  | 1     | 34    | 72 | 2  | 0   | 1 |   |   |
| Q5V1B9_HALMA | 0.9857 | Holliday junction DNA helicase                                | <i>ruvB</i>     | mmAC1792 | 850  | 3.4  | 2 | 1 | 1      | K | YMGPEPAQKVVEELFQLAR                        | A         | 3         | 2008.0088 | 2009.0182 | 1.0094  | -1.0034 | 3.01    | 4.09  | 0.349 | 725.6 | 2  | 27 | 64  | 2 | 1 | 1 |
| Q5V1K4_HALMA | 0.9857 | 2-isopropylmalate synthase 2 (EC 2.3.3.13)                    | <i>leuA1</i>    | mmAC1690 | 502  | 3.6  | 1 | 1 | 1      | R | VTMADLLTIADEVTTDDAR                        | A         | 2         | 1931.9324 | 1931.9383 | 0.0059  | 0       | 3.05    | 2.769 | 0.358 | 255.8 | 2  | 14 | 34  | 2 | 0 | 1 |
| Q5V203_HALMA | 0.9857 | Hypothetical protein                                          | <i>rmAC1529</i> | mmAC1529 | 438  | 4.3  | 1 | 1 | 1      | R | TYAEVVVELVEGMDLPAAVR                       | A         | 3         | 2061.0452 | 2061.0469 | 0.0017  | 0       | 0.82    | 3.772 | 0.425 | 866.4 | 1  | 29 | 72  | 2 | 0 | 1 |
| Q5V235_HALMA | 0.9857 | HTR-like protein                                              | <i>htrD</i>     | mmAC1494 | 122  | 16.4 | 1 | 1 | 1      | R | EHHDVADAATEHGVTAVVQK                       | G         | 3         | 2090.9868 | 2090.9893 | 0.0025  | 0       | 1.20    | 3.075 | 0.381 | 873.3 | 1  | 28 | 76  | 2 | 0 | 1 |
| Q5V248_HALMA | 0.9857 | Sucrose-6-phosphate hydrolase                                 | <i>scrB</i>     | mmAC1479 | 703  | 2    | 1 | 1 | 1      | R | LDAGDTEQLPVESR                             | S         | 2         | 1528.7369 | 1528.7379 | 0.0010  | 0       | 0.65    | 4.362 | 0.429 | 1336  | 1  | 21 | 26  | 2 | 0 | 1 |
| Q5V2L0_HALMA | 0.9857 | Putative transcriptional regulator                            | <i>rmAC1307</i> | mmAC1307 | 80   | 35   | 1 | 1 | 1      | R | VVSPVFEGESLVDQHLVHDALGDHLTR                | D         | 3         | 3096.5628 | 3097.5889 | 1.0261  | -1.0034 | 7.35    | 4.269 | 0.531 | 1254  | 1  | 41 | 108 | 2 | 0 | 1 |
| Q5V2W3_HALMA | 0.9857 | Hypothetical protein                                          | <i>rmAC1190</i> | mmAC1190 | 105  | 22.9 | 1 | 1 | 1      | R | AQSLPGDEATFDTVLSAFTDAIER                   | E         | 2         | 2553.2234 | 2553.2327 | 0.0093  | 0       | 3.64    | 5.357 | 0.583 | 1665  | 1  | 25 | 46  | 2 | 0 | 1 |
| Q5V2W6_HALMA | 0.9857 | Molybdenum cofactor biosynthesis protein C                    | <i>mocC</i>     | mmAC1187 | 157  | 16.6 | 1 | 1 | 0.9998 | R | SEEFTHVDEEGDAQMVVDGDKAESQR                 | E         | 3         | 2907.2464 | 2908.2593 | 1.0129  | -1.0034 | 3.28    | 6.514 | 0.386 | 2973  | 1  | 41 | 100 | 2 | 1 | 1 |
| Q5V2X1_HALMA | 0.9857 | Hypothetical protein                                          | <i>rmAC1181</i> | mmAC1181 | 274  | 4.4  | 1 | 1 | 1      | R | SNVTEFVAEAR                                | R         | 2         | 1334.6830 | 1335.6853 | 1.0023  | -1.0034 | -0.79   | 3.901 | 0.446 | 2022  | 1  | 19 | 22  | 2 | 0 | 1 |
| Q5V3F6_HALMA | 0.9857 | Hypothetical protein                                          | <i>rmAC0977</i> | mmAC0977 | 162  | 22.2 | 1 | 1 | 1      | R | LGPEADHEALEPGDYVALPAGEESAHEIEAGESELR       | L         | 4         | 3786.7496 | 3787.7710 | 1.0214  | -1.0034 | 4.77    | 5.19  | 0.458 | 1327  | 1  | 53 | 210 | 2 | 0 | 1 |
| Q5V3J9_HALMA | 0.9857 | 3-ketoacyl-CoA thiolase (EC 2.3.1.16)                         | <i>acaB4</i>    | mmAC0929 | 388  | 3.6  | 1 | 1 | 1      | R | NGEAEVVVVGAER                              | M         | 2         | 1384.6946 | 1384.6951 | 0.0005  | 0       | 0.36    | 3.667 | 0.422 | 2156  | 1  | 20 | 26  | 2 | 0 | 1 |
| Q5V3U1_HALMA | 0.9857 | Branched-chain amino acid ABC transporter ATP-binding protein | <i>livF-4</i>   | mmAC0829 | 251  | 8    | 1 | 1 | 1      | R | SEQSAGTLSGGQQMLAMGR                        | A         | 2         | 2035.9415 | 2036.9453 | 1.0038  | -1.0034 | 0.22    | 3.817 | 0.337 | 962.2 | 1  | 20 | 38  | 2 | 0 | 1 |
| Q5V3Y2_HALMA | 0.9857 | Universal stress protein                                      | <i>usp30</i>    | mmAC0781 | 138  | 15.2 | 1 | 1 | 0.9988 | L | TLVIAIAENDSVSPAVIDTAVR                     | L         | 2         | 2124.1790 | 2124.1895 | 0.0105  | 0       | 4.94    | 3.278 | 0.362 | 619.9 | 1  | 19 | 40  | 2 | 0 | 1 |
| Q5V450_HALMA | 0.9857 | Shikimate 5-dehydrogenase (EC 1.1.1.25)                       | <i>aroE</i>     | mmAC0707 | 265  | 18.1 | 1 | 1 | 1      | R | YVTFEPADAGAEAEIAETLGVGD.LNVITPFQDVLDAVDPAL | I         | 3         | 4994.5077 | 4995.5200 | 1.0123  | -1.0034 | 1.79    | 5.206 | 0.541 | 964.4 | 1  | 48 | 188 | 2 | 1 | 1 |
| Q5V452_HALMA | 0.9857 | Hypothetical protein                                          | <i>rmAC0704</i> | mmAC0704 | 451  | 2.9  | 1 | 1 | 1      | R | HLLGVGGGHYAPR                              | F         | 3         | 1332.7051 | 1332.3382 | -0.3669 | 0       | -275.30 | 3.207 | 0.483 | 1931  | 1  | 32 | 48  | 2 | 0 | 1 |
| Q5V472_HALMA | 0.9857 | Arsenical pump-driving ATPase                                 | <i>arsA2</i>    | mmAC0678 | 362  | 10.5 | 1 | 1 | 1      | R | FLSGMMDNLTGMFGDQDDQVDAAEGIEDLQELSDRIEHLR   | G         | 4         | 4268.8936 | 4268.9063 | 0.0127  | 0       | 2.98    | 5.338 | 0.324 | 1887  | 1  | 53 | 222 | 2 | 1 | 1 |
| Q5V4B0_HALMA | 0.9857 | NTP pyrophosphohydrolase                                      | <i>nudB</i>     | mmAC0634 | 215  | 15.3 | 1 | 1 | 1      | R | ISSLEAAVDKVPVTETFELSPDEYADVFAATR           | G         | 3         | 3662.7515 | 3663.7696 | 1.0181  | -1.0034 | 4.03    | 4.651 | 0.421 | 989.9 | 1  | 37 | 128 | 2 | 1 | 1 |
| Q5V4B2_HALMA | 0.9857 | Hypothetical protein                                          | <i>rmAC0632</i> | mmAC0632 | 239  | 5.4  | 1 | 1 | 0.9991 | M | TDGAWVSLFSGGK                              | D         | 2         | 1323.6459 | 1323.6454 | -0.0005 | 0       | -0.38   | 2.951 | 0.402 | 1328  | 1  | 18 | 24  | 2 | 0 | 1 |
| Q5V4L0_HALMA | 0.9857 | Peroxioredoxin                                                | <i>bcp-1</i>    | mmAC0522 | 155  | 14.2 | 1 | 1 | 1      | R | EIVDSYDISMDFEALGVPNVAK                     | R         | 2         | 2411.1566 | 2411.1590 | 0.0024  | 0       | 1.00    | 2.958 | 0.397 | 474.2 | 1  | 16 | 42  | 2 | 0 | 1 |
| Q5V4S8_HALMA | 0.9857 | Transcription regulator                                       | <i>rmAC0440</i> | mmAC0440 | 180  | 8.3  | 1 | 1 | 1      | R | RIVTALLEEAGEGIKK                           | K         | 3         | 1597.9039 | 1597.9052 | 0.0013  | 0       | 0.81    | 4.827 | 0.334 | 1841  | 1  | 33 | 56  | 2 | 0 | 1 |
| Q5V538_HALMA | 0.9857 | Hypothetical protein                                          | <i>rmAC0312</i> | mmAC0312 | 274  | 15.3 | 1 | 1 | 1      | E | 4391.8545                                  | 4392.8526 | 0.9981    | -1.0034   | -1.20     | 5.031   | 0.442   | 1033    | 1     | 50    | 246   | 2  | 0  | 1   |   |   |   |
| Q5V547_HALMA | 0.9857 | Hypothetical protein                                          | <i>rmAC0300</i> | mmAC0300 | 239  | 7.9  | 1 | 1 | 1      | K | GTGSDADVHVLGDGETEL                         | -         | 2         | 1975.8647 | 1975.8699 | 0.0052  | 0       | 2.63    | 4.677 | 0.568 | 1964  | 1  | 25 | 36  | 2 | 0 | 1 |
| Q5V592_HALMA | 0.9857 | Hypothetical protein                                          | <i>rmAC0253</i> | mmAC0253 | 170  | 24.7 | 1 | 1 | 1      | R | TYTVGDALAEAFERGDWLAQFDSLVDRTDPLLEPGVDATI   | -         | 3         | 4626.1925 | 4627.2139 | 1.0214  | -1.0034 | 3.90    | 3.829 | 0.419 | 333.6 | 1  | 31 | 164 | 2 | 2 | 1 |
| Q5V5C6_HALMA | 0.9857 | Hypothetical protein                                          | <i>rmAC0217</i> | mmAC0217 | 118  | 11.9 | 1 | 1 | 1      | R | TPSDYRAELLSLR                              | A         | 3         | 1632.8835 | 1632.8878 | 0.0043  | 0       | 2.63    | 2.793 | 0.309 | 1475  | 1  | 28 | 52  | 2 | 1 | 1 |
| Q5V860_HALMA | 0.9857 | Hypothetical protein                                          | <i>pNG1006</i>  | pNG1006  | 181  | 12.7 | 1 | 1 | 0.9995 | M | TESQTNPEDSDDGDATVQLGAR                     | V         | 2         | 2420.0211 | 2421.045  |         |         |         |       |       |       |    |    |     |   |   |   |

|                   |        |                                                                                                                                                                                         |                 |          |      |      |   |   |        |   |                                              |   |   |           |           |         |         |         |       |       |       |     |    |     |   |   |   |
|-------------------|--------|-----------------------------------------------------------------------------------------------------------------------------------------------------------------------------------------|-----------------|----------|------|------|---|---|--------|---|----------------------------------------------|---|---|-----------|-----------|---------|---------|---------|-------|-------|-------|-----|----|-----|---|---|---|
| Q5V366_HALMA      | 0.9703 | Long-chain fatty-acid-CoA ligase                                                                                                                                                        | <i>fadD3</i>    | mmAC1074 | 660  | 1.7  | 1 | 1 | 0.9989 | R | TENPGPILTAK                                  | H | 2 | 1139.6186 | 1139.6203 | 0.0017  | 0       | 1.49    | 1.948 | 0.265 | 439.4 | 7   | 12 | 20  | 2 | 0 | 1 |
| Q5V491_HALMA      | 0.9703 | P-hydroxybenzoate hydroxylase (EC 1.14.13.2)                                                                                                                                            | <i>rmAC0657</i> | mmAC0657 | 472  | 3.8  | 1 | 1 | 0.9989 | R | ERDSIMDDIYEVTGAEPK                           | Y | 3 | 2066.9466 | 2066.9507 | 0.0041  | 0       | 1.98    | 2.585 | 0.201 | 987.7 | 1   | 25 | 68  | 2 | 1 | 1 |
| Q5UZ18_HALMA      | 0.9689 | Hypothetical protein                                                                                                                                                                    | <i>rmAC2718</i> | mmAC2718 | 159  | 13.8 | 1 | 1 | 0.9988 | R | NESDDRVVALALGAPMNSTEGR                       | V | 3 | 2301.1019 | 2301.1033 | 0.0014  | 0       | 0.61    | 3.097 | 0.167 | 787.2 | 1   | 29 | 84  | 2 | 1 | 1 |
| Q5V1B5_HALMA      | 0.9689 | HTR-like protein                                                                                                                                                                        | <i>htrC</i>     | mmAC1797 | 300  | 5    | 1 | 1 | 0.9988 | R | FMELLPVPEPLFDAR                              | T | 2 | 1772.9171 | 1774.8253 | 1.9082  | -2.0067 | -55.56  | 2.505 | 0.323 | 389.8 | 1   | 15 | 28  | 2 | 0 | 1 |
| CDC65_HALMAReview | 0.9676 | Cell division control protein 6 homolog 5 (CDC6 homolog 5)                                                                                                                              | <i>cdc6-5</i>   | mmAC2862 | 375  | 4.8  | 1 | 1 | 0.9987 | K | TTAVQLFDELTAQTDVK                            | R | 3 | 1992.0415 | 1993.0281 | 0.9866  | -1.0034 | -8.41   | 2.663 | 0.242 | 608   | 1   | 24 | 68  | 2 | 0 | 1 |
| Q5V4N3_HALMA      | 0.9676 | Transcription repressor                                                                                                                                                                 | <i>strR</i>     | mmAC0496 | 230  | 20.4 | 1 | 1 | 0.9987 | R | RVAAVLDEPEFDPHGDPFPSDLSLPIDDESATALSEHGEGGRLE | V | 5 | 4980.3649 | 4982.3980 | 2.0331  | -2.0067 | 5.30    | 3.694 | 0.096 | 1102  | 1   | 63 | 368 | 2 | 1 | 1 |
| Q5V1W1_HALMA      | 0.9649 | UDP-glucose 4-epimerase                                                                                                                                                                 | <i>galE8</i>    | mmAC1573 | 322  | 2.2  | 1 | 1 | 0.9985 | R | TIEWFEK                                      | S | 2 | 951.4702  | 951.4697  | -0.0005 | 0       | -0.53   | 2.144 | 0.186 | 288   | 22  | 10 | 12  | 2 | 0 | 1 |
| Q5V7Z7_HALMA      | 0.9649 | Hypothetical protein                                                                                                                                                                    | <i>pNG3032</i>  | pNG3032  | 390  | 2.8  | 1 | 1 | 0.9985 | K | RALPDDDVRYK                                  | T | 3 | 1346.6942 | 1347.6981 | 1.0039  | -1.0034 | 0.41    | 2.744 | 0.207 | 1112  | 1   | 21 | 40  | 2 | 1 | 1 |
| ARLY_HALMAReview  | 0.9581 | Argininosuccinate lyase (EC 4.3.2.1) (Argininosuccinase) (ASAL)                                                                                                                         | <i>argH</i>     | mmAC2681 | 499  | 6    | 1 | 1 | 0.9980 | R | GGAPADVAEQVSVAVDALAADREVLADRR                | Q | 4 | 3017.5530 | 3018.5711 | 1.0181  | -1.0034 | 4.89    | 1.981 | 0.182 | 238   | 1   | 34 | 174 | 2 | 1 | 1 |
| Q5UZ58_HALMA      | 0.9581 | Threonine synthase                                                                                                                                                                      | <i>thrC3</i>    | mmAC2667 | 463  | 5.4  | 1 | 1 | 0.9980 | R | YNAALPFEEGITLPEGDTPLHEMPR                    | L | 3 | 2796.3429 | 2796.3501 | 0.0072  | 0       | 2.57    | 2.71  | 0.202 | 212.9 | 7   | 24 | 96  | 2 | 0 | 1 |
| Q5V294_HALMA      | 0.9555 | Phosphoribosylaminoimidazole carboxylase ATP binding subunit(EC 4.1.1.21)                                                                                                               | <i>purK</i>     | mmAC1431 | 381  | 5.2  | 2 | 1 | 0.9896 | R | KMGHVTLTDDDRDGLLADAR                         | D | 4 | 2198.0750 | 2198.0760 | 0.0010  | 0       | 0.45    | 2.971 | 0.025 | 1261  | 1   | 35 | 114 | 2 | 1 | 1 |
| Q5UXE1_HALMA      | 0.9554 | 5-formyltetrahydrofolate cyclo-ligase (EC 6.3.3.2)                                                                                                                                      | <i>rmAC3378</i> | mmAC3378 | 242  | 3.3  | 1 | 1 | 0.9978 | K | TVYMAVPR                                     | L | 2 | 935.4898  | 935.4917  | 0.0019  | 0       | 2.03    | 1.935 | 0.143 | 669.5 | 1   | 12 | 14  | 2 | 0 | 1 |
| Q5UZ88_HALMA      | 0.9554 | Ribose-phosphate pyrophosphokinase (EC 2.7.6.1)                                                                                                                                         | <i>prsA</i>     | mmAC2630 | 330  | 4.2  | 1 | 1 | 0.9978 | R | QDEAFKPEGPVSSR                               | A | 3 | 1545.7423 | 1545.7438 | 0.0015  | 0       | 0.97    | 2.625 | 0.161 | 738.9 | 4   | 23 | 52  | 2 | 0 | 1 |
| HIS4_HALMAReview  | 0.9541 | 1-(5-phosphoribosyl)-5-[(5-phosphoribosylamino)methylideneamino]imidazole-4-carboxamide isomerase (EC 5.3.1.16)(Phosphoribosylformimino-5-aminoimidazole carboxamide ribotideisomerase) | <i>hisA</i>     | mmAC2529 | 246  | 6.1  | 1 | 1 | 0.9977 | R | TLHLVDLDGAFEGER                              | Q | 3 | 1670.8264 | 1670.8269 | 0.0005  | 0       | 0.30    | 3.526 | 0.106 | 724.2 | 9   | 22 | 56  | 2 | 0 | 1 |
| Q5UXG3_HALMA      | 0.9525 | Hypothetical protein                                                                                                                                                                    | <i>rmAC3351</i> | mmAC3351 | 453  | 6.2  | 2 | 1 | 0.9888 | R | YGGEHLLYVAR                                  | Y | 3 | 1276.6564 | 1276.6559 | -0.0005 | 0       | -0.39   | 2.138 | 0.129 | 525.9 | 6   | 18 | 40  | 2 | 0 | 1 |
| Q5UYB7_HALMA      | 0.9475 | Hypothetical protein                                                                                                                                                                    | <i>rmAC3010</i> | mmAC3010 | 219  | 6.8  | 1 | 1 | 0.9972 | R | VTGDGECEDCGCTIVR                             | T | 2 | 1552.6497 | 1553.3854 | 0.7357  | -1.0034 | -172.38 | 2.935 | 0.163 | 721.3 | 1   | 15 | 28  | 2 | 0 | 1 |
| Q5UXJ1_HALMA      | 0.9423 | Transcription regulator                                                                                                                                                                 | <i>rmAC3322</i> | mmAC3322 | 119  | 20.2 | 1 | 1 | 0.9968 | R | TNQYSLTESGKDAVLQGLQWVFGK                     | F | 3 | 2655.3180 | 2655.3296 | 0.0116  | 0       | 4.37    | 2.643 | 0.163 | 1079  | 1   | 30 | 92  | 2 | 1 | 1 |
| Q5V319_HALMA      | 0.9423 | Hypothetical protein                                                                                                                                                                    | <i>rmAC1128</i> | mmAC1128 | 94   | 16   | 1 | 1 | 0.9968 | R | IGLFDVPTGEHLFTV                              | - | 2 | 1643.8559 | 1643.8617 | 0.0058  | 0       | 3.53    | 2.175 | 0.131 | 549.9 | 1   | 15 | 28  | 2 | 0 | 1 |
| Q5V0B6_HALMA      | 0.9410 | Hypothetical protein                                                                                                                                                                    | <i>rmAC2200</i> | mmAC2200 | 111  | 19.8 | 1 | 1 | 0.9967 | R | RIDELTEHDLLEHDNLSDDR                         | R | 4 | 2660.3042 | 2660.3047 | 0.0005  | 0       | 0.19    | 2.944 | 0.076 | 1048  | 1   | 37 | 126 | 2 | 0 | 1 |
| Q5V0K1_HALMA      | 0.9371 | Hypothetical protein                                                                                                                                                                    | <i>rmAC2101</i> | mmAC2101 | 87   | 12.6 | 1 | 1 | 0.9964 | K | GIVEESMLSR                                   | T | 2 | 1190.5965 | 1192.6054 | 2.0089  | -2.0067 | 1.85    | 2.696 | 0.215 | 1265  | 3   | 15 | 20  | 2 | 0 | 1 |
| Q5UY49_HALMA      | 0.9345 | Transcription regulator                                                                                                                                                                 | <i>pspA2</i>    | mmAC3089 | 241  | 5    | 1 | 1 | 0.9962 | R | AALQEGRRDDLAR                                | R | 3 | 1313.6687 | 1313.7211 | 0.0524  | 0       | 39.89   | 2     | 0.187 | 557.1 | 1   | 21 | 44  | 2 | 1 | 1 |
| Q5UW64_HALMA      | 0.9332 | Cell division protein                                                                                                                                                                   | <i>ftsZ2</i>    | rmB0325  | 425  | 3.3  | 1 | 1 | 0.9961 | D | ALAVFAGPPAWLIR                               | R | 2 | 1480.8554 | 1480.8603 | 0.0049  | 0       | 3.31    | 2.731 | 0.044 | 916.4 | 1   | 17 | 26  | 2 | 0 | 1 |
| Q5V7C7_HALMA      | 0.9269 | Hypothetical protein                                                                                                                                                                    | <i>pNG6122</i>  | pNG6122  | 249  | 4.4  | 1 | 1 | 0.9956 | R | STLYREYHLQR                                  | F | 3 | 1464.7473 | 1466.7238 | 1.9765  | -2.0067 | -20.62  | 2.722 | 0.168 | 750.3 | 1   | 19 | 40  | 2 | 1 | 1 |
| Q5V5A3_HALMA      | 0.9256 | 2-haloalkanoic acid dehalogenase (EC 3.8.1.2)                                                                                                                                           | <i>hadL</i>     | mmAC0241 | 235  | 6    | 1 | 1 | 0.9955 | K | ALADRVDDPQPFSR                               | L | 3 | 1537.7848 | 1537.7863 | 0.0015  | 0       | 0.98    | 2.914 | 0.091 | 1726  | 1   | 32 | 52  | 2 | 1 | 1 |
| Q5V0A5_HALMA      | 0.9244 | Deoxycytidine triphosphate deaminase                                                                                                                                                    | <i>dcd1</i>     | mmAC2215 | 140  | 10   | 1 | 1 | 0.9954 | R | GATHTPLHVDALPR                               | V | 3 | 1483.7895 | 1483.7918 | 0.0023  | 0       | 1.55    | 2.76  | 0.088 | 664.1 | 1   | 22 | 52  | 2 | 0 | 1 |
| Q5V318_HALMA      | 0.9231 | Thioredoxin reductase (EC 1.8.1.9)                                                                                                                                                      | <i>trxB3</i>    | mmAC1129 | 349  | 8.9  | 1 | 1 | 0.9953 | R | NTELEMHGSPEDGVDHVTLAQNDEGHPSEK               | L | 4 | 3384.5164 | 3386.5310 | 2.0146  | -2.0067 | 2.33    | 3.261 | 0.125 | 972.4 | 1   | 41 | 180 | 2 | 0 | 1 |
| Q5V639_HALMA      | 0.9144 | Formate dehydrogenase alpha subunit                                                                                                                                                     | <i>fdhG</i>     | pNG7318  | 1103 | 1.7  | 1 | 1 | 0.9946 | D | PDVGTDTDDPTTLTVDGER                          | V | 2 | 2002.8967 | 2003.7254 | 0.8287  | -1.0034 | -87.20  | 3.389 | 0.394 | 420   | 1   | 15 | 36  | 1 | 0 | 1 |
| Q5UWR5_HALMA      | 0.9095 | Hypothetical protein                                                                                                                                                                    | <i>rmB0082</i>  | rmB0082  | 81   | 25.9 | 1 | 1 | 0.9942 | R | ALAEHSHREFQTLGDRFIQR                         | H | 4 | 2481.3088 | 2481.3101 | 0.0013  | 0       | 0.52    | 1.911 | 0.068 | 369.9 | 1   | 32 | 120 | 2 | 2 | 1 |
| Q5V6V8_HALMA      | 0.9035 | Transcriptional regulator                                                                                                                                                               | <i>kdgR1</i>    | pNG7021  | 255  | 6.7  | 1 | 1 | 0.9937 | K | RAEKYEASLRPLALGER                            | T | 4 | 1958.0697 | 1958.9242 | 0.8545  | -1.0034 | -76.02  | 3.185 | 0.11  | 1280  | 1   | 35 | 96  | 2 | 1 | 1 |
| Q5V0N4_HALMA      | 0.8890 | Aldehyde ferredoxin oxidoreductase                                                                                                                                                      | <i>aor1</i>     | mmAC2064 | 648  | 14.2 | 3 | 1 | 0.9710 | K | SPLTGTVTDSHHGWSGAR                           | L | 3 | 1921.9031 | 1922.9181 | 1.0150  | -1.0034 | 6.06    | 2.41  | 0.124 | 651.7 | 1   | 25 | 72  | 2 | 0 | 1 |
| Q5V583_HALMA      | 0.8969 | Hypothetical protein                                                                                                                                                                    | <i>rmAC0262</i> | mmAC0262 | 59   | 45.8 | 2 | 3 | 0.9094 | K | CPDCGQIYR                                    | C | 2 | 1181.4957 | 1179.4817 | -2.0140 | 2       | -11.85  | 2.877 | 0.072 | 960.3 | 1   | 14 | 18  | 2 | 0 | 1 |
| Q5V583_HALMA      | 0.8969 | Hypothetical protein                                                                                                                                                                    | <i>rmAC0262</i> | mmAC0262 | 59   | 45.8 | 2 | 3 | 0.9733 | C | CPDCGQIYR                                    | C | 2 | 1181.4957 | 1179.4810 | -2.0147 | 2       | -12.44  | 3.083 | 0.124 | 955.4 | 1   | 14 | 18  | 2 | 0 | 1 |
| DLDH3_HALMAReview | 0.8766 | Dihydropolypol dehydrogenase 3 (EC 1.8.1.4) (Dihydropolipoimidedehydrogenase 3)                                                                                                         | <i>lpdA3</i>    | rmB0197  | 477  | 13.4 | 2 | 3 | 0.9914 | R | ALTANRAEGFVR                                 | I | 3 | 1303.6997 | 1303.7027 | 0.0030  | 0       | 2.30    | 2.461 | 0.161 | 363.4 | 40  | 19 | 44  | 2 | 1 | 1 |
| DLDH3_HALMAReview | 0.8766 | Dihydropolypol dehydrogenase 3 (EC 1.8.1.4) (Dihydropolipoimidedehydrogenase 3)                                                                                                         | <i>lpdA3</i>    | rmB0197  | 477  | 13.4 | 2 | 3 | 0.9903 | R | ALTANRAEGFVR                                 | I | 3 | 1303.6997 | 1303.7012 | 0.0015  | 0       | 1.15    | 2.386 | 0.152 | 353.6 | 22  | 20 | 44  | 2 | 1 | 1 |
| Q5V064_HALMA      | 0.8606 | Hypothetical protein                                                                                                                                                                    | <i>rmAC2259</i> | mmAC2259 | 217  | 22.1 | 2 | 2 | 0.9052 | R | CTDCDHVHKEQLPEEETLQR                         | S | 3 | 2409.0689 | 2407.0569 | -2.0120 | 2       | -4.98   | 3.322 | 0.088 | 1214  | 1   | 34 | 76  | 2 | 1 | 1 |
| Q5V1I7_HALMA      | 0.8031 | Uroporphyrin-III C-methyltransferase                                                                                                                                                    | <i>hemX</i>     | mmAC1709 | 215  | 18.6 | 2 | 1 | 0.9844 | R | ERFEDEFGNAGLMADLVGDLREDLDR                   | G | 4 | 3137.4836 | 3137.4903 | 0.0067  | 0       | 2.14    | 3.713 | 0.108 | 1523  | 2   | 42 | 156 | 2 | 3 | 1 |
| PHNC1_HALMAReview | 0.5672 | Phosphonates import ATP-binding protein phnC 1 (EC 3.6.3.28)                                                                                                                            | <i>phnC1</i>    | pNG7233  | 273  | 5.1  | 1 | 3 | 0.9511 | K | SLSAGERQRFVAFAR                              | A | 3 | 1546.8328 | 1545.7450 | -1.0878 | 1       | -69.69  | 2.891 | 0.184 | 665.1 | 8   | 20 | 52  | 2 | 2 | 1 |
| Q5V5L3_HALMA      | 0.8975 | Inosine-5'-monophosphate dehydrogenase related protein V                                                                                                                                | <i>guaB5</i>    | mmAC0114 | 194  | 15.5 | 1 | 2 | 0.9932 | R | EYVGASESDDLLLETTELLIREDQHPILVLR              | G | 4 | 3452.7675 | 3452.7837 | 0.0162  | 0       | 4.69    | 2.342 | 0.056 | 654.6 | 1   | 40 | 174 | 2 | 1 | 1 |
| Q5V5L3_HALMA      | 0.8975 | Inosine-5'-monophosphate dehydrogenase related protein V                                                                                                                                | <i>guaB5</i>    | mmAC0114 | 194  | 15.5 | 1 | 2 | 0.9916 | R | EYVGASESDDLLLETTELLIREDQHPILVLR              | G | 4 | 3452.7675 | 3452.7681 | 0.0006  | 0       | 0.17    | 1.986 | 0.105 | 459.5 | 4   | 34 | 174 | 2 | 1 | 1 |
| Q5V0P4_HALMA      | 0.8457 | Transcription regulator                                                                                                                                                                 | <i>rmAC2052</i> | mmAC2052 | 263  | 2.7  | 1 | 2 | 0.9638 | R | AEAWIVR                                      | S | 2 | 843.4603  | 843.4615  | 0.0012  | 0       | 1.42    | 1.827 | 0     | 809.2 | 3   | 11 | 12  | 2 | 0 | 1 |
| Q5V0P4_HALMA      | 0.8457 | Transcription regulator                                                                                                                                                                 | <i>rmAC2052</i> | mmAC2052 | 263  | 2.7  | 1 | 2 | 0.9886 | R | AEAWIVR                                      | S | 2 | 843.4603  | 843.4654  | 0.0051  | 0       | 6.05    | 2.015 | 0.058 | 854.8 | 8   | 11 | 12  | 2 | 0 | 1 |
| Q5UY07_HALMA      | 0.8300 | MaoC family protein                                                                                                                                                                     | <i>maoC2</i>    | mmAC3139 | 297  | 5.7  | 1 | 2 | 0.9654 | L | IVHGTLVSGIISAALAR                            | L | 3 | 1676.9937 | 1677.0012 | 0.0075  | 0       | 4.47    | 2.59  | 0.072 | 578.1 | 25  | 21 | 64  | 2 | 0 | 1 |
| Q5UY07_HALMA      | 0.8300 | MaoC family protein                                                                                                                                                                     | <i>maoC2</i>    | mmAC3139 | 297  | 5.7  | 1 | 2 | 0.9871 | R | IVHGTLVSGIISAALAR                            | L | 3 | 1676.9937 | 1677.9982 | 1.0045  | -1.0034 | 0.69    | 3.178 | 0.133 | 863.2 | 10  | 24 | 64  | 2 | 0 | 1 |
| Q5UX05_HALMA      | 0.8219 | NADH dehydrogenase/oxidoreductase                                                                                                                                                       | <i>ndhG2</i>    | mmAC3531 | 497  | 2    | 1 | 2 | 0.9709 | R | DASAABAALK                                   | Y | 2 | 915.5025  | 915.4427  | -0.0598 | 0       | -65.32  | 2.131 | 0.078 | 590.7 | 93  | 11 | 18  | 2 | 0 | 1 |
| Q5UX05_HALMA      | 0.8219 | NADH dehydrogenase/oxidoreductase                                                                                                                                                       | <i>ndhG2</i>    | mmAC3531 | 497  | 2    | 1 | 2 | 0.9863 | R | DASAABAALK                                   | Y | 2 | 915.5025  | 915.4436  | -0.0589 | 0       | -64.34  | 2.47  | 0.075 | 604.4 | 129 | 12 | 18  | 2 | 0 | 1 |
| Q5UWG9_HALMA      | 0.8129 | Pyruvate dehydrogenase E1 component alpha subunit (EC 1.2.4.1)                                                                                                                          | <i>pdhA2</i>    | rmB0200  | 382  | 3.9  | 1 | 2 | 0.9854 | K | YAHGMDLVSLFEPLR                              | G | 3 | 1746.8763 | 1746.8886 | 0.0123  | 0       | 7.04    | 2.338 | 0.136 | 744.2 | 22  | 22 | 56  | 2 | 0 | 1 |
| Q5UWG9_HALMA      | 0.8129 | Pyruvate dehydrogenase E1 component alpha subunit (EC 1.2.4.1)                                                                                                                          | <i>pdhA2</i>    | rmB0200  | 382  | 3.9  | 1 | 2 | 0.9164 | K | YAHGMDLVSLFEPLR                              | G | 3 | 1746.8763 | 1747.8764 | 1.0001  | -1.0034 | -1.86   | 2.544 | 0.042 | 948.9 | 1   | 23 | 56  | 2 | 0 | 1 |
| FTHS_HALMAReview  | 0.8040 | Formate--tetrahydrofolate ligase (EC 6.3.4.3) (Formyltetrahydrofolatesynthetase) (FHS) (FTHFS)                                                                                          | <i>fts</i>      | pNG7380  |      |      |   |   |        |   |                                              |   |   |           |           |         |         |         |       |       |       |     |    |     |   |   |   |

|                   |        |                                                            |                  |          |     |      |   |   |        |   |                                              |   |   |           |           |         |         |         |       |       |       |     |    |     |   |   |   |                                              |  |
|-------------------|--------|------------------------------------------------------------|------------------|----------|-----|------|---|---|--------|---|----------------------------------------------|---|---|-----------|-----------|---------|---------|---------|-------|-------|-------|-----|----|-----|---|---|---|----------------------------------------------|--|
| Q5V0S0_HALMA      | 0.4664 | Peptide methionine sulfoxide reductase MsrA (EC 1.8.4.6)   | <i>msrA1</i>     | rmAC2024 | 177 | 5.6  | 1 | 1 | 0.9280 | K | LEETHEELLR                                   | A | 3 | 1267.6408 | 1268.6482 | 1.0074  | -1.0034 | 3.19    | 2.312 | 0.126 | 357.8 | 65  | 17 | 36  | 2 | 0 | 1 |                                              |  |
| MUTS2_HALMAReview | 0.4613 | DNA mismatch repair protein mutS 2                         | <i>mutS2</i>     | rmAC2937 | 947 | 1.3  | 1 | 1 | 0.9266 | R | RPLLDADRIEAR                                 | H | 3 | 1423.7895 | 1423.7899 | 0.0004  | 0       | 0.28    | 2.169 | 0.011 | 815.8 | 1   | 21 | 44  | 2 | 1 | 1 |                                              |  |
| Q5UYU9_HALMA      | 0.4563 | Hypothetical protein                                       | <i>rrmAC2798</i> | rmAC2798 | 130 | 10.8 | 1 | 1 | 0.9252 | R | SVGIDDSAAADVVR                               | A | 2 | 1373.6786 | 1374.1454 | 0.4668  | 0       | 339.82  | 1.676 | 0.129 | 238.3 | 79  | 10 | 26  | 2 | 0 | 1 |                                              |  |
| CDC63_HALMAReview | 0.4490 | Cell division control protein 6 homolog 3 (CDC6 homolog 3) | <i>cdc6-3</i>    | rmAC1568 | 403 | 2.5  | 1 | 1 | 0.9231 | R | IRDVYPLYRR                                   | I | 3 | 1349.7568 | 1349.2881 | -0.4687 | 0       | -347.25 | 1.927 | 0.063 | 768.2 | 6   | 18 | 36  | 2 | 1 | 1 |                                              |  |
| Q5V6K0_HALMA      | 0.4480 | Universal stress protein                                   | <i>usp31</i>     | pNG7142  | 140 | 9.3  | 1 | 1 | 0.9228 | R | VVQNAGRPVLVAT                                | - | 2 | 1322.7670 | 1322.7654 | -0.0016 | 0       | -1.21   | 1.916 | 0.06  | 153.8 | 55  | 11 | 24  | 2 | 0 | 1 |                                              |  |
| Q5V059_HALMA      | 0.4017 | Hypothetical protein                                       | <i>rrmAC2265</i> | rmAC2265 | 224 | 7.1  | 1 | 1 | 0.9080 | R | IPADLVYEFIDEMSER                             | V | 3 | 1925.9081 | 1927.9882 | 2.0801  | -2.0067 | 38.11   | 2.392 | 0.088 | 666.4 | 4   | 23 | 60  | 2 | 0 | 1 |                                              |  |
| Q5UYL6_HALMA      | 0.3857 | Hypothetical protein                                       | <i>rrmAC2892</i> | rmAC2892 | 331 | 2.1  | 1 | 1 | 0.9022 | R | AAFWVYR                                      | T | 2 | 911.4653  | 911.4654  | 0.0001  | 0       | 0.11    | 1.468 | 0.223 | 324.5 | 1   | 10 | 12  | 2 | 0 | 1 |                                              |  |
| Q5UXQ3_HALMA      | 0.3852 | Hypothetical protein                                       | <i>rrmAC3253</i> | rmAC3253 | 198 | 12.6 | 1 | 1 | 0.9020 | R | KALEEREAAIGHIPVETSPGVSLTR                    | R | 4 | 2717.4348 | 2717.4234 | -0.0114 | 0       | -4.20   | 2.203 | 0.124 | 474.2 | 190 | 32 | 144 | 2 | 1 | 1 |                                              |  |
| Q5UYT0_HALMA      | 0      | Hypothetical protein                                       | <i>rrmAC2817</i> | rmAC2817 | 535 | NA   | 2 | 0 | 0.9473 | R | LRHDNGNILADSGEGYASK                          | S | 3 | 2015.9661 | 2016.9523 | 0.9862  | -1.0034 | -8.51   | 3.844 | 0.331 | 2036  | 1   | 36 | 72  | 2 | 1 | 1 |                                              |  |
| Q5UYT0_HALMA      | 0      | Hypothetical protein                                       | <i>rrmAC2817</i> | rmAC2817 | 535 | NA   | 2 | 0 | 0.9965 | R | LRHDNGNILADSGEGYASK                          | S | 3 | 2015.9661 | 2015.9677 | 0.0016  | 0       | 0.79    | 4.935 | 0.4   | 2158  | 1   | 35 | 72  | 2 | 1 | 1 |                                              |  |
| Q5UYT0_HALMA      | 0      | Hypothetical protein                                       | <i>rrmAC2817</i> | rmAC2817 | 535 | NA   | 2 | 0 | 0.9963 | R | LRHDNGNILADSGEGYASK                          | S | 3 | 2015.9661 | 2015.9652 | -0.0009 | 0       | -0.45   | 4.873 | 0.404 | 1915  | 1   | 34 | 72  | 2 | 1 | 1 |                                              |  |
| Q5UYT0_HALMA      | 0      | Hypothetical protein                                       | <i>rrmAC2817</i> | rmAC2817 | 535 | NA   | 2 | 0 | 0.9959 | R | LRHDNGNILADSGEGYASK                          | S | 3 | 2015.9661 | 2015.9660 | -0.0001 | 0       | -0.05   | 4.779 | 0.403 | 2179  | 1   | 37 | 72  | 2 | 1 | 1 |                                              |  |
| Q5UYT0_HALMA      | 0      | Hypothetical protein                                       | <i>rrmAC2817</i> | rmAC2817 | 535 | NA   | 2 | 0 | 0.9954 | R | LRHDNGNILADSGEGYASK                          | S | 3 | 2015.9661 | 2015.9690 | 0.0029  | 0       | 1.44    | 4.66  | 0.395 | 2347  | 1   | 38 | 72  | 2 | 1 | 1 |                                              |  |
| Q5V0G4_HALMA      | 0      | Phosphate transport system regulatory protein PhoU         | <i>phoU1</i>     | rmAC2145 | 225 | NA   | 1 | 0 | 0.9723 | K | IITDLR                                       | I | 2 | 858.4811  | 858.4830  | 0.0019  | 0       | 2.21    | 1.687 | 0.057 | 401.4 | 3   | 10 | 12  | 2 | 0 | 2 | Q5V1Z9_HALMA ;                               |  |
| Q5V0G4_HALMA      | 0      | Phosphate transport system regulatory protein PhoU         | <i>phoU1</i>     | rmAC2145 | 225 | NA   | 1 | 0 | 0.9773 | K | IITDLR                                       | I | 2 | 858.4811  | 858.4832  | 0.0021  | 0       | 2.45    | 1.736 | 0.027 | 466.9 | 1   | 11 | 12  | 2 | 0 | 2 | Q5V1Z9_HALMA ;                               |  |
| Q5V0I4_HALMA      | 0      | Hypothetical protein                                       | <i>rrmAC2119</i> | rmAC2119 | 635 | NA   | 1 | 0 | 0.9999 | R | LLDDFLGR                                     | R | 2 | 947.5076  | 947.5055  | -0.0021 | 0       | -2.22   | 2.486 | 0.251 | 865   | 1   | 13 | 14  | 2 | 0 | 2 | DECOY_840 ;                                  |  |
| Q5V852_HALMA      | 0      | Transcription regulator                                    | <i>padR</i>      | pNG2006  | 94  | NA   | 0 | 0 | 0.9998 | - | MHDLTGFQR                                    | D | 2 | 1103.5182 | 1103.5254 | 0.0072  | 0       | 6.52    | 2.321 | 0.262 | 558.1 | 3   | 12 | 16  | 2 | 0 | 4 | Q5V6Y0_HALMA ; Q5V752_HALMA ; Q5V3E2_HALMA ; |  |
| Q5V879_HALMA      | 0      | Phage integrase                                            | <i>tnp</i>       | pNG1020  | 341 | NA   | 0 | 0 | 0.9762 | K | QLREPDENEAVFPR                               | L | 2 | 1698.8325 | 1699.2053 | 0.3728  | 0       | 219.44  | 2.758 | 0.081 | 694.9 | 7   | 13 | 26  | 2 | 1 | 3 | Q5UWU6_HALMA ; Q5UW19_HALMA ;                |  |
|                   |        |                                                            |                  |          |     |      |   |   |        |   |                                              |   |   |           |           |         |         |         |       |       |       |     |    |     |   |   |   |                                              |  |
| DECOY_3956        | 0.7943 | Decoy protein DECOY_3956                                   | -                | -        | 468 | 9.2  | 3 | 1 | 0.9407 | R | RGFTVDSIPFNEVAR                              | Q | 2 | 1706.8740 | 1706.8778 | 0.0038  | 0       | 2.23    | 2.039 | 0.026 | 336.6 | 12  | 13 | 28  | 2 | 0 | 1 |                                              |  |
| DECOY_840         | 0.9965 | Decoy protein DECOY_840                                    | -                | -        | 524 | 3.6  | 2 | 2 | 0.9818 | K | ELLIAFLVIK                                   | S | 2 | 1270.8264 | 1270.7055 | -0.1209 | 0       | -95.13  | 1.87  | 0.088 | 561.9 | 4   | 11 | 20  | 2 | 0 | 1 |                                              |  |
| DECOY_2098        | 0.9554 | Decoy protein DECOY_2098                                   | -                | -        | 261 | 10.7 | 2 | 1 | 0.9978 | R | EAVTEVSGVLAYDR                               | I | 2 | 1507.7518 | 1507.6496 | -0.1022 | 0       | -67.78  | 2.088 | 0.22  | 494.6 | 8   | 12 | 26  | 2 | 0 | 1 |                                              |  |
| DECOY_2936        | 0.6784 | Decoy protein DECOY_2936                                   | -                | -        | 464 | 1.7  | 1 | 3 | 0.9694 | R | QGPIVLHR                                     | R | 2 | 918.5399  | 918.5055  | -0.0344 | 0       | -37.45  | 1.736 | 0.079 | 545.1 | 9   | 10 | 14  | 2 | 0 | 1 |                                              |  |
| DECOY_3359        | 0.8447 | Decoy protein DECOY_3359                                   | -                | -        | 362 | 11.6 | 1 | 1 | 0.9885 | L | VMFGTFCFAPLAGISAGFAGGAFAAIALVLM DVATLGF AIAM | - | 4 | 4110.0895 | 4109.9473 | -0.1422 | 0       | -34.60  | 3.639 | 0.184 | 810.4 | 1   | 45 | 246 | 1 | 0 | 1 |                                              |  |
| DECOY_2445        | 0.7335 | Decoy protein DECOY_2445                                   | -                | -        | 944 | 1.9  | 1 | 1 | 0.9766 | R | TAVDRAVAETDAGDQLQR                           | G | 4 | 1914.9395 | 1914.9708 | 0.0313  | 0       | 16.35   | 1.89  | 0.004 | 631.3 | 1   | 36 | 102 | 2 | 1 | 1 |                                              |  |
| DECOY_3488        | 0.6734 | Decoy protein DECOY_3488                                   | -                | -        | 387 | 6.7  | 1 | 1 | 0.9687 | R | GGRMDPVLYPANSMSEMGGALCVSAR                   | G | 4 | 2684.2224 | 2684.2681 | 0.0457  | 0       | 17.03   | 2.534 | 0.034 | 1070  | 4   | 39 | 150 | 2 | 1 | 1 | GGRMDPVLYPANSMSEM[147]GGALCVSAR              |  |
| DECOY_963         | 0.5560 | Decoy protein DECOY_963                                    | -                | -        | 155 | 4.5  | 1 | 1 | 0.9489 | K | SAKEPYR                                      | G | 2 | 849.4344  | 849.7454  | 0.3110  | 0       | 366.13  | 1.778 | 0.106 | 831.5 | 2   | 10 | 12  | 2 | 1 | 1 |                                              |  |
| DECOY_3970        | 0.5472 | Decoy protein DECOY_3970                                   | -                | -        | 132 | 12.1 | 1 | 1 | 0.9471 | T | GLEAVEVLENVTDLNR                             | V | 2 | 1769.9159 | 1769.8585 | -0.0574 | 0       | -32.43  | 2.303 | 0.249 | 647   | 1   | 17 | 30  | 1 | 0 | 1 |                                              |  |
| DECOY_2048        | 0.5362 | Decoy protein DECOY_2048                                   | -                | -        | 193 | 15.5 | 1 | 1 | 0.9448 | G | ALYGGQVIAIAIGLKL L DLPY PAMVAAAR             | A | 3 | 3080.7824 | 3080.6480 | -0.1344 | 0       | -43.63  | 3.039 | 0.293 | 375   | 19  | 23 | 116 | 1 | 1 | 1 |                                              |  |
| DECOY_2797        | 0.4996 | Decoy protein DECOY_2797                                   | -                | -        | 375 | 2.7  | 1 | 1 | 0.9365 | R | ALHSTHGGTR                                   | S | 2 | 1035.5210 | 1036.2654 | 0.7444  | -1.0034 | -250.07 | 1.677 | 0.266 | 143.8 | 89  | 10 | 18  | 2 | 0 | 1 |                                              |  |
| DECOY_2498        | 0.4781 | Decoy protein DECOY_2498                                   | -                | -        | 180 | 10   | 1 | 1 | 0.9311 | - | RAWILLALAAIGAAAATK                           | T | 3 | 1808.1036 | 1808.3480 | 0.2444  | 0       | 135.17  | 2.164 | 0.1   | 341.7 | 32  | 23 | 68  | 2 | 1 | 1 |                                              |  |
| DECOY_3726        | 0.4546 | Decoy protein DECOY_3726                                   | -                | -        | 526 | 2.1  | 1 | 1 | 0.9247 | K | GASINSSQADK                                  | G | 2 | 1076.5098 | 1076.4638 | -0.0460 | 0       | -42.73  | 1.953 | 0.01  | 575.8 | 18  | 13 | 20  | 2 | 0 | 1 |                                              |  |
| DECOY_1811        | 0.4473 | Decoy protein DECOY_1811                                   | -                | -        | 56  | 19.6 | 1 | 1 | 0.9226 | R | GYNDKEVDGAR                                  | L | 2 | 1222.5578 | 1222.2254 | -0.3324 | 0       | -271.89 | 1.714 | 0.114 | 469.1 | 1   | 13 | 20  | 2 | 1 | 1 |                                              |  |
| DECOY_2538        | 0.4301 | Decoy protein DECOY_2538                                   | -                | -        | 602 | 2.7  | 1 | 1 | 0.9174 | R | VADWFPQVQFSAGTTQR                            | D | 3 | 1789.8747 | 1789.4481 | -0.4266 | 0       | -238.34 | 1.808 | 0.129 | 234.8 | 104 | 18 | 60  | 2 | 0 | 1 |                                              |  |
| DECOY_3572        | 0.4203 | Decoy protein DECOY_3572                                   | -                | -        | 452 | 5.1  | 1 | 1 | 0.9143 | D | SVSLWLAGAVLMFLPAASALALR                      | W | 4 | 2356.3341 | 2356.0916 | -0.2425 | 0       | -102.91 | 2.361 | 0.164 | 659.8 | 5   | 35 | 132 | 1 | 0 | 1 |                                              |  |
| DECOY_843         | 0.4026 | Decoy protein DECOY_843                                    | -                | -        | 173 | 19.7 | 1 | 1 | 0.9083 | R | TDYIAIGICSGLGSTTLMAPETTVKYEAIGVKIR           | E | 3 | 3586.8671 | 3586.7481 | -0.1190 | 0       | -33.18  | 2.43  | 0.032 | 406.6 | 4   | 24 | 132 | 2 | 2 | 1 | TDYIAIGICSGLGSTTL M[147]APETTVKYEAIGVKIR     |  |

<sup>a</sup> NA: Protein without unique peptide identification.

<sup>b</sup> Mass difference: Indicates the deviations between the calculated neutral peptide mass and precursor neutral mass (derived from the measured m

<sup>c</sup> Mass difference adjustment: An adjustment of "-1.00335" and "-2.0067" was applied when the precursor mass was presumably assigned to the +1 and +2 respectively, isotopic peak and "+1" and "+2" for precursor mass with a putative "-1" and "-2" dalton shift.
