# Supplementary material
Source: PubMed Central journal article supplement (PMC3168985)
Supplement: NIHMS304204-supplement-3_si_003.pdf [file NIHMS304204-supplement-3_si_003.pdf]

**Supplementary Table 3.** Summary of the proteins and peptides identified in tryptic digested membrane proteome (OD<sub>600</sub> = 0.7). The protein information include the Integr8 protein ID, protein identification (*ProteinProphet*) probability, protein description, gene name, locus name, protein length, percentage of protein sequence covered by MS identified peptides (% coverage), number of unique peptide identifications, and total number of identified peptides. The peptide information include the peptide identification(*PeptideProphet*) probability, N-terminus adjacent amino acid residue, matched peptide sequence, C-terminus adjacent amino acid residue, precursor charge, calculated neutral peptide mass, measured precursor neutral mass, measured and calculated peptide mass difference, mass difference adjustment, mass difference (ppm),*SEQUEST* scores (XCorr, deltCn, Sp score, Sp rank), number of matched b- and y-ions, number of theoretical b- and y- ions, number of tryptic termini, number of tryptic missed cleavages, number of matched protein, alternative matched protein ID, and modification. Listed are the peptides with an identification probability  $\geq 0.9$ .

| Protein ID   | Protein prob. | Protein description       | Gene Name   | Locus name | Protein length | Percent coverage <sup>a</sup> | No. unique peptides | Total no. identified peptides | Peptide prob. | N-terminus adjacent aa | Matched peptide sequence             | C-terminus adjacent aa | Precursor charge | Calc neutral pep mass | Precursor neutral mass | Mass difference <sup>b</sup> | Mass difference adjustment <sup>c</sup> | Mass difference (ppm) | Xcorr | Deltaen | Sp score | Sp rank | No. matched ions | No. theoretical ions | Tryptic termini | No. missed cleavage | No. matched proteins | Alternative matched protein | Modification |
|--------------|---------------|---------------------------|-------------|------------|----------------|-------------------------------|---------------------|-------------------------------|---------------|------------------------|--------------------------------------|------------------------|------------------|-----------------------|------------------------|------------------------------|-----------------------------------------|-----------------------|-------|---------|----------|---------|------------------|----------------------|-----------------|---------------------|----------------------|-----------------------------|--------------|
| Q5V7F4_HALMA | 1             | Cell surface glycoprotein | <i>csg1</i> | pNG5138    | 887            | 51.9                          | 99                  | 2366                          | 1             | N                      | VGDVQEVGLVDNTGPVSASTVASVNGSDQEVADVTR | Y                      | 3                | 3570.7285             | 3571.7429              | 1.0144                       | -1.0034                                 | 3.10                  | 6.43  | 0.579   | 0        | 1       | 46               | 140                  | 1               | 0                   | 1                    |                             |              |
| Q5V7F4_HALMA | 1             | Cell surface glycoprotein | <i>csg1</i> | pNG5138    | 887            | 51.9                          | 99                  | 2366                          | 1             | D                      | ADLDSDDGTVDITLITTSDFNSGVSGATALR      | V                      | 2                | 2900.3159             | 2900.3270              | 0.0111                       | 0                                       | 3.82                  | 4.526 | 0.626   | 0        | 1       | 27               | 56                   | 1               | 0                   | 1                    |                             |              |
| Q5V7F4_HALMA | 1             | Cell surface glycoprotein | <i>csg1</i> | pNG5138    | 887            | 51.9                          | 99                  | 2366                          | 1             | D                      | ADLDSDDGTVDITLITTSDFNSGVSGATALR      | V                      | 2                | 2900.3159             | 2901.3255              | 1.0096                       | -1.0034                                 | 2.16                  | 5.38  | 0.606   | 0        | 1       | 29               | 56                   | 1               | 0                   | 1                    |                             |              |
| Q5V7F4_HALMA | 1             | Cell surface glycoprotein | <i>csg1</i> | pNG5138    | 887            | 51.9                          | 99                  | 2366                          | 1             | R                      | ADYNFQEAEDLEITVEDENGLEVTNEIVVQK      | T                      | 4                | 3552.6631             | 3553.6686              | 1.0055                       | -1.0034                                 | 0.61                  | 5.573 | 0.4     | 0        | 1       | 52               | 180                  | 2               | 0                   | 1                    |                             |              |
| Q5V7F4_HALMA | 1             | Cell surface glycoprotein | <i>csg1</i> | pNG5138    | 887            | 51.9                          | 99                  | 2366                          | 1             | R                      | ADYNFQEAEDLEITVEDENGLEVTNEIVVQK      | T                      | 4                | 3552.6631             | 3552.6867              | 0.0236                       | 0                                       | 6.64                  | 4.861 | 0.367   | 0        | 1       | 48               | 180                  | 2               | 0                   | 1                    |                             |              |
| Q5V7F4_HALMA | 1             | Cell surface glycoprotein | <i>csg1</i> | pNG5138    | 887            | 51.9                          | 99                  | 2366                          | 1             | R                      | ADYNFQEAEDLEITVEDENGLEVTNEIVVQK      | T                      | 3                | 3552.6631             | 3552.6696              | 0.0065                       | 0                                       | 1.82                  | 4.377 | 0.437   | 0        | 1       | 34               | 120                  | 2               | 0                   | 1                    |                             |              |
| Q5V7F4_HALMA | 1             | Cell surface glycoprotein | <i>csg1</i> | pNG5138    | 887            | 51.9                          | 99                  | 2366                          | 1             | R                      | ADYNFQEAEDLEITVEDENGLEVTNEIVVQK      | T                      | 3                | 3552.6631             | 3552.6699              | 0.0068                       | 0                                       | 1.92                  | 3.568 | 0.473   | 0        | 1       | 28               | 120                  | 2               | 0                   | 1                    |                             |              |
| Q5V7F4_HALMA | 1             | Cell surface glycoprotein | <i>csg1</i> | pNG5138    | 887            | 51.9                          | 99                  | 2366                          | 1             | R                      | ADYNFQEAEDLEITVEDENGLEVTNEIVVQK      | T                      | 2                | 3552.6631             | 3554.6627              | 1.9996                       | -2.0067                                 | -2.01                 | 3.36  | 0.474   | 0        | 1       | 16               | 60                   | 2               | 0                   | 1                    |                             |              |
| Q5V7F4_HALMA | 1             | Cell surface glycoprotein | <i>csg1</i> | pNG5138    | 887            | 51.9                          | 99                  | 2366                          | 1             | R                      | ADYNFQEAEDLEITVEDENGLEVTNEIVVQK      | T                      | 3                | 3552.6631             | 3552.6564              | -0.0067                      | 0                                       | -1.89                 | 5.436 | 0.517   | 0        | 1       | 35               | 120                  | 2               | 0                   | 1                    |                             |              |
| Q5V7F4_HALMA | 1             | Cell surface glycoprotein | <i>csg1</i> | pNG5138    | 887            | 51.9                          | 99                  | 2366                          | 1             | R                      | ADYNFQEAEDLEITVEDENGLEVTNEIVVQK      | T                      | 3                | 3552.6631             | 3552.6681              | 0.0050                       | 0                                       | 1.40                  | 7.219 | 0.502   | 0        | 1       | 41               | 120                  | 2               | 0                   | 1                    |                             |              |
| Q5V7F4_HALMA | 1             | Cell surface glycoprotein | <i>csg1</i> | pNG5138    | 887            | 51.9                          | 99                  | 2366                          | 1             | R                      | ADYNFQEAEDLEITVEDENGLEVTNEIVVQK      | T                      | 3                | 3552.6631             | 3552.6696              | 0.0065                       | 0                                       | 1.82                  | 5.89  | 0.53    | 0        | 1       | 34               | 120                  | 2               | 0                   | 1                    |                             |              |
| Q5V7F4_HALMA | 1             | Cell surface glycoprotein | <i>csg1</i> | pNG5138    | 887            | 51.9                          | 99                  | 2366                          | 1             | R                      | ADYNFQEAEDLEITVEDENGLEVTNEIVVQK      | T                      | 3                | 3552.6631             | 3552.6747              | 0.0116                       | 0                                       | 3.26                  | 6.588 | 0.543   | 0        | 1       | 37               | 120                  | 2               | 0                   | 1                    |                             |              |
| Q5V7F4_HALMA | 1             | Cell surface glycoprotein | <i>csg1</i> | pNG5138    | 887            | 51.9                          | 99                  | 2366                          | 1             | R                      | ADYNFQEAEDLEITVEDENGLEVTNEIVVQK      | T                      | 3                | 3552.6631             | 3552.6641              | 0.0010                       | 0                                       | 0.27                  | 6.444 | 0.589   | 0        | 1       | 31               | 120                  | 2               | 0                   | 1                    |                             |              |
| Q5V7F4_HALMA | 1             | Cell surface glycoprotein | <i>csg1</i> | pNG5138    | 887            | 51.9                          | 99                  | 2366                          | 1             | R                      | ADYNFQEAEDLEITVEDENGLEVTNEIVVQK      | T                      | 3                | 3552.6631             | 3552.6780              | 0.0149                       | 0                                       | 4.19                  | 4.236 | 0.314   | 0.1      | 1       | 27               | 120                  | 2               | 0                   | 1                    |                             |              |
| Q5V7F4_HALMA | 1             | Cell surface glycoprotein | <i>csg1</i> | pNG5138    | 887            | 51.9                          | 99                  | 2366                          | 1             | R                      | ADYNFQEAEDLEITVEDENGLEVTNEIVVQK      | T                      | 4                | 3552.6631             | 3554.6909              | 2.0278                       | -2.0067                                 | 5.93                  | 4.796 | 0.345   | 0        | 1       | 47               | 180                  | 2               | 0                   | 1                    |                             |              |
| Q5V7F4_HALMA | 1             | Cell surface glycoprotein | <i>csg1</i> | pNG5138    | 887            | 51.9                          | 99                  | 2366                          | 1             | R                      | ADYNFQEAEDLEITVEDENGLEVTNEIVVQK      | T                      | 4                | 3552.6631             | 3552.6850              | 0.0219                       | 0                                       | 6.16                  | 5.841 | 0.417   | 0        | 1       | 45               | 180                  | 2               | 0                   | 1                    |                             |              |
| Q5V7F4_HALMA | 1             | Cell surface glycoprotein | <i>csg1</i> | pNG5138    | 887            | 51.9                          | 99                  | 2366                          | 1             | R                      | ADYNFQEAEDLEITVEDENGLEVTNEIVVQK      | T                      | 3                | 3552.6631             | 3552.6688              | 0.0057                       | 0                                       | 1.61                  | 6.084 | 0.56    | 0        | 1       | 38               | 120                  | 2               | 0                   | 1                    |                             |              |
| Q5V7F4_HALMA | 1             | Cell surface glycoprotein | <i>csg1</i> | pNG5138    | 887            | 51.9                          | 99                  | 2366                          | 1             | R                      | ADYNFQEAEDLEITVEDENGLEVTNEIVVQK      | T                      | 3                | 3552.6631             | 3552.6575              | -0.0056                      | 0                                       | -1.59                 | 3.567 | 0.344   | 0.1      | 1       | 25               | 120                  | 2               | 0                   | 1                    |                             |              |
| Q5V7F4_HALMA | 1             | Cell surface glycoprotein | <i>csg1</i> | pNG5138    | 887            | 51.9                          | 99                  | 2366                          | 1             | R                      | ADYNFQEAEDLEITVEDENGLEVTNEIVVQK      | T                      | 4                | 3552.6631             | 3552.6650              | 0.0019                       | 0                                       | 0.52                  | 6.897 | 0.482   | 0        | 1       | 54               | 180                  | 2               | 0                   | 1                    |                             |              |
| Q5V7F4_HALMA | 1             | Cell surface glycoprotein | <i>csg1</i> | pNG5138    | 887            | 51.9                          | 99                  | 2366                          | 1             | R                      | ADYNFQEAEDLEITVEDENGLEVTNEIVVQK      | T                      | 4                | 3552.6631             | 3552.6682              | 0.0050                       | 0                                       | 1.42                  | 6.313 | 0.397   | 0        | 1       | 56               | 180                  | 2               | 0                   | 1                    |                             |              |
| Q5V7F4_HALMA | 1             | Cell surface glycoprotein | <i>csg1</i> | pNG5138    | 887            | 51.9                          | 99                  | 2366                          | 1             | R                      | ADYNFQEAEDLEITVEDENGLEVTNEIVVQK      | T                      | 3                | 3552.6631             | 3552.6747              | 0.0116                       | 0                                       | 3.26                  | 7.123 | 0.543   | 0        | 1       | 39               | 120                  | 2               | 0                   | 1                    |                             |              |
| Q5V7F4_HALMA | 1             | Cell surface glycoprotein | <i>csg1</i> | pNG5138    | 887            | 51.9                          | 99                  | 2366                          | 1             | R                      | ADYNFQEAEDLEITVEDENGLEVTNEIVVQK      | T                      | 4                | 3552.6631             | 3554.6909              | 2.0278                       | -2.0067                                 | 5.93                  | 6.7   | 0.491   | 0        | 1       | 53               | 180                  | 2               | 0                   | 1                    |                             |              |
| Q5V7F4_HALMA | 1             | Cell surface glycoprotein | <i>csg1</i> | pNG5138    | 887            | 51.9                          | 99                  | 2366                          | 1             | R                      | ADYNFQEAEDLEITVEDENGLEVTNEIVVQK      | T                      | 3                | 3552.6631             | 3552.6740              | 0.0108                       | 0                                       | 3.05                  | 5.944 | 0.489   | 0        | 1       | 36               | 120                  | 2               | 0                   | 1                    |                             |              |
| Q5V7F4_HALMA | 1             | Cell surface glycoprotein | <i>csg1</i> | pNG5138    | 887            | 51.9                          | 99                  | 2366                          | 1             | R                      | ADYNFQEAEDLEITVEDENGLEVTNEIVVQK      | T                      | 3                | 3552.6631             | 3552.6714              | 0.0083                       | 0                                       | 2.33                  | 5.819 | 0.527   | 0        | 1       | 34               | 120                  | 2               | 0                   | 1                    |                             |              |
| Q5V7F4_HALMA | 1             | Cell surface glycoprotein | <i>csg1</i> | pNG5138    | 887            | 51.9                          | 99                  | 2366                          | 1             | R                      | ADYNFQEAEDLEITVEDENGLEVTNEIVVQK      | T                      | 3                | 3552.6631             | 3552.6729              | 0.0097                       | 0                                       | 2.74                  | 6.851 | 0.589   | 0        | 1       | 39               | 120                  | 2               | 0                   | 1                    |                             |              |
| Q5V7F4_HALMA | 1             | Cell surface glycoprotein | <i>csg1</i> | pNG5138    | 887            | 51.9                          | 99                  | 2366                          | 1             | R                      | ADYNFQEAEDLEITVEDENGLEVTNEIVVQK      | T                      | 3                | 3552.6631             | 3552.6688              | 0.0057                       | 0                                       | 1.61                  | 5.386 | 0.45    | 0        | 1       | 32               | 120                  | 2               | 0                   | 1                    |                             |              |
| Q5V7F4_HALMA | 1             | Cell surface glycoprotein | <i>csg1</i> | pNG5138    | 887            | 51.9                          | 99                  | 2366                          | 1             | R                      | ADYNFQEAEDLEITVEDENGLEVTNEIVVQK      | T                      | 3                | 3552.6631             | 3552.6754              | 0.0123                       | 0                                       | 3.47                  | 6.627 | 0.567   | 0        | 1       | 39               | 120                  | 2               | 0                   | 1                    |                             |              |
| Q5V7F4_HALMA | 1             | Cell surface glycoprotein | <i>csg1</i> | pNG5138    | 887            | 51.9                          | 99                  | 2366                          | 1             | R                      | ADYNFQEAEDLEITVEDENGLEVTNEIVVQK      | T                      | 3                | 3552.6631             | 3552.6685              | 0.0054                       | 0                                       | 1.51                  | 6.901 | 0.525   | 0        | 1       | 41               | 120                  | 2               | 0                   | 1                    |                             |              |
| Q5V7F4_HALMA | 1             | Cell surface glycoprotein | <i>csg1</i> | pNG5138    | 887            | 51.9                          | 99                  | 2366                          | 1             | R                      | ADYNFQEAEDLEITVEDENGLEVTNEIVVQK      | T                      | 3                | 3552.6631             | 3552.6718              | 0.0087                       | 0                                       | 2.44                  | 6.368 | 0.543   | 0        | 1       | 39               | 120                  | 2               | 0                   | 1                    |                             |              |
| Q5V7F4_HALMA | 1             | Cell surface glycoprotein | <i>csg1</i> | pNG5138    | 887            | 51.9                          | 99                  | 2366                          | 1             | R                      | ADYNFQEAEDLEITVEDENGLEVTNEIVVQK      | T                      | 3                | 3552.6631             | 3552.6707              | 0.0076                       | 0                                       | 2.13                  | 5.627 | 0.468   | 0        | 1       | 37               | 120                  | 2               | 0                   | 1                    |                             |              |
| Q5V7F4_HALMA | 1             | Cell surface glycoprotein | <i>csg1</i> | pNG5138    | 887            | 51.9                          | 99                  | 2366                          | 1             | R                      | ADYNFQEAEDLEITVEDENGLEVTNEIVVQK      | T                      | 3                | 3552.6631             | 3552.6626              | -0.0005                      | 0                                       | -0.14                 | 5.932 | 0.496   | 0        | 1       | 39               | 120                  | 2               | 0                   | 1                    |                             |              |
| Q5V7F4_HALMA | 1             | Cell surface glycoprotein | <i>csg1</i> | pNG5138    | 887            | 51.9                          | 99                  | 2366                          | 1             | R                      | ADYNFQEAEDLEITVEDENGLEVTNEIVVQK      | T                      | 3                | 3552.6631             | 3552.6802              | 0.0171                       | 0                                       | 4.81                  | 6.167 | 0.467   | 0        | 1       | 40               | 120                  | 2               | 0                   | 1                    |                             |              |
| Q5V7F4_HALMA | 1             | Cell surface glycoprotein | <i>csg1</i> | pNG5138    | 887            | 51.9                          | 99                  | 2366                          | 1             | R                      | ADYNFQEAEDLEITVEDENGLEVTNEIVVQK      | T                      | 3                | 3552.6631             | 3552.6707              | 0.0076                       | 0                                       | 2.13                  | 6.024 | 0.541   | 0        | 1       | 43               | 120                  | 2               | 0                   | 1                    |                             |              |
| Q5V7F4_HALMA | 1             | Cell surface glycoprotein | <i>csg1</i> | pNG5138    | 887            | 51.9                          | 99                  | 2366                          | 1             | R                      | ADYNFQEAEDLEITVEDENGLEVTNEIVVQK      | T                      | 4                | 3552.6631             | 3553.6662              | 1.0031                       | -1.0034                                 | -0.08                 | 5.299 | 0.331   | 0        | 1       | 46               | 180                  | 2               | 0                   | 1                    |                             |              |
| Q5V7F4_HALMA | 1             | Cell surface glycoprotein | <i>csg1</i> | pNG5138    | 887            | 51.9                          | 99                  | 2366                          | 1             | R                      | ADYNFQEAEDLEITVEDENGLEVTNEIVVQK      | T                      | 3                | 3552.6631             | 3552.6612              | -0.0020                      | 0                                       | -0.55                 | 5.641 | 0.551   | 0        | 1       | 35               | 120                  | 2               | 0                   | 1                    |                             |              |
| Q5V7F4_HALMA | 1             | Cell surface glycoprotein | <i>csg1</i> | pNG5138    | 887            | 51.9                          | 99                  | 2366                          | 1             | R                      | ADYNFQEAEDLEITVEDENGLEVTNEIVVQK      | T                      | 3                | 3552.6631             | 3552.6773              | 0.0141                       | 0                                       | 3.98                  | 5.512 | 0.558   | 0        | 1       | 38               | 120                  | 2               | 0                   | 1                    |                             |              |
| Q5V7F4_HALMA | 1             | Cell surface glycoprotein | <i>csg1</i> | pNG5138    | 887            | 51.9                          | 99                  | 2366                          | 1             | R                      | ADYNFQEAEDLEITVEDENGLEVTNEIVVQK      | T                      | 3                | 3552.6631             | 3552.6721              | 0.0090                       | 0                                       | 2.54                  | 4.131 | 0.404   | 0        | 1       | 29               | 120                  | 2               | 0                   | 1                    |                             |              |
| Q5V7F4_HALMA | 1             | Cell surface glycoprotein | <i>csg1</i> | pNG5138    | 887            | 51.9                          | 99                  | 2366                          | 1             | R                      | ADYNFQEAEDLEITVEDENGLEVTNEIVVQK      | T                      | 3                | 3552.6631             | 3553.6582              | 0.9950                       | -1.0034                                 | -2.34                 | 4.217 | 0.323   | 0        | 1       | 28               | 120                  | 2               | 0                   | 1                    |                             |              |
| Q5V7F4_HALMA | 1             | Cell surface glycoprotein | <i>csg1</i> | pNG5138    | 887            | 51.9                          | 99                  | 2366                          | 1             | R                      | ADYNFQEAEDLEITVEDENGLEVTNEIVVQK      | T                      | 3                | 3552.6631             | 3552.6703              | 0.0072                       | 0                                       | 2.02                  | 4.999 | 0.556   | 0        | 1       | 39               | 120                  | 2               | 0                   | 1                    |                             |              |
| Q5V7F4_HALMA | 1             | Cell surface glycoprotein | <i>csg1</i> | pNG5138    | 887            | 51.9                          | 99                  | 2366                          | 1             | R                      | ADYNFQEAEDLEITVEDENGLEVTNEIVVQK      | T                      | 3                | 3552.6631             | 3552.6652              | 0.0021                       | 0                                       | 0.58                  | 6.65  | 0.514   | 0        | 1       | 41               | 120                  | 2               | 0                   | 1                    |                             |              |
| Q5V7F4_HALMA | 1             | Cell surface glycoprotein | <i>csg1</i> | pNG5138    | 887            | 51.9                          | 99                  | 2366                          | 1             | R                      | ADYNFQEAEDLEITVEDENGLEVTNEIVVQK      | T                      | 4                | 3552.6631             | 3553.6603              | 0.9972                       | -1.0034                                 | -1.72                 | 5.134 | 0.349   | 0        | 1       | 45               | 180                  | 2               | 0                   | 1                    |                             |              |
| Q5V7F4_HALMA | 1             | Cell surface glycoprotein | <i>csg1</i> | pNG5138    | 887            | 51.9                          | 99                  | 2366                          | 1             | R                      | ADYNFQEAEDLEITVEDENGLEVTNEIVVQK      | T                      | 3                | 3552.6631             | 3552.6765              | 0.0134                       | 0                                       | 3.77                  | 4.443 | 0.355   | 0        | 1       | 36               | 120                  | 2               | 0                   | 1                    |                             |              |
| Q5V7F4_HALMA | 1             | Cell surface glycoprotein | <i>csg1</i> | pNG5138    | 887            | 51.9                          | 99                  | 2366                          | 1             | R                      | ADYNFQEAEDLEITVEDENGLEVTNEIVVQK      | T                      | 2                | 3552.6631             | 3552.6583              | -0.0048                      | 0                                       | -1.36                 | 2.841 | 0.426   | 0        | 1       | 18               | 60                   | 2               | 0                   | 1                    |                             |              |
| Q5V7F4_HALMA | 1             | Cell surface glycoprotein | <i>csg1</i> | pNG5138    | 887            | 51.9                          | 99                  | 2366                          | 1             | R                      | ADYNFQEAEDLEITVEDENGLEVTNEIVVQK      | T                      | 3                | 3552.6631             | 3552.6703              | 0.0072                       | 0                                       | 2.02                  | 4.968 | 0.429   | 0        | 1       | 37               | 120                  | 2               | 0                   | 1                    |                             |              |
| Q5V7F4_HALMA | 1             | Cell surface glycoprotein | <i>csg1</i> | pNG5138    | 887            | 51.9                          | 99                  | 2366                          | 1             | R                      | ADYNFQEAEDLEITVEDENGLEVTNEIVVQK      | T                      | 3                | 3552.6631             | 3552.6663              | 0.0032                       | 0                                       | 0.89                  | 6.356 | 0.552   | 0        | 1       | 38               | 120                  | 2               | 0                   | 1                    |                             |              |
| Q5V7F4_HALMA | 1             | Cell surface glycoprotein | <i>csg1</i> | pNG5138    | 887            | 51.9                          | 99                  | 2366                          | 1             | R                      | ADYNFQEAEDLEITVEDENGLEVTNEIVVQK      | T                      | 3                | 3552.6631             | 3552.6725              |                              |                                         |                       |       |         |          |         |                  |                      |                 |                     |                      |                             |              |

|              |   |                           |      |         |     |      |    |      |   |   |                                 |   |   |           |           |         |         |       |       |       |     |   |    |     |   |   |   |
|--------------|---|---------------------------|------|---------|-----|------|----|------|---|---|---------------------------------|---|---|-----------|-----------|---------|---------|-------|-------|-------|-----|---|----|-----|---|---|---|
| Q5V7F4_HALMA | 1 | Cell surface glycoprotein | csg1 | pNG5138 | 887 | 51.9 | 99 | 2366 | 1 | R | ADYNFQEAEDLEITVEDENGLEVTNEIVVQK | T | 4 | 3552.6631 | 3553.6672 | 1.0041  | -1.0034 | 0.20  | 4.773 | 0.353 | 0   | 1 | 52 | 180 | 2 | 0 | 1 |
| Q5V7F4_HALMA | 1 | Cell surface glycoprotein | csg1 | pNG5138 | 887 | 51.9 | 99 | 2366 | 1 | R | ADYNFQEAEDLEITVEDENGLEVTNEIVVQK | T | 4 | 3552.6631 | 3552.6613 | -0.0018 | 0       | -0.51 | 5.634 | 0.437 | 0   | 1 | 47 | 180 | 2 | 0 | 1 |
| Q5V7F4_HALMA | 1 | Cell surface glycoprotein | csg1 | pNG5138 | 887 | 51.9 | 99 | 2366 | 1 | R | ADYNFQEAEDLEITVEDENGLEVTNEIVVQK | T | 4 | 3552.6631 | 3553.6721 | 1.0089  | -1.0034 | 1.57  | 5.413 | 0.473 | 0   | 1 | 49 | 180 | 2 | 0 | 1 |
| Q5V7F4_HALMA | 1 | Cell surface glycoprotein | csg1 | pNG5138 | 887 | 51.9 | 99 | 2366 | 1 | R | ADYNFQEAEDLEITVEDENGLEVTNEIVVQK | T | 4 | 3552.6631 | 3553.6711 | 1.0080  | -1.0034 | 1.30  | 5.873 | 0.469 | 0   | 1 | 46 | 180 | 2 | 0 | 1 |
| Q5V7F4_HALMA | 1 | Cell surface glycoprotein | csg1 | pNG5138 | 887 | 51.9 | 99 | 2366 | 1 | R | ADYNFQEAEDLEITVEDENGLEVTNEIVVQK | T | 3 | 3552.6631 | 3552.6641 | 0.0010  | 0       | 0.27  | 4.885 | 0.405 | 0   | 1 | 35 | 120 | 2 | 0 | 1 |
| Q5V7F4_HALMA | 1 | Cell surface glycoprotein | csg1 | pNG5138 | 887 | 51.9 | 99 | 2366 | 1 | R | ADYNFQEAEDLEITVEDENGLEVTNEIVVQK | T | 3 | 3552.6631 | 3552.6729 | 0.0097  | 0       | 2.74  | 6.423 | 0.538 | 0   | 1 | 38 | 120 | 2 | 0 | 1 |
| Q5V7F4_HALMA | 1 | Cell surface glycoprotein | csg1 | pNG5138 | 887 | 51.9 | 99 | 2366 | 1 | R | ADYNFQEAEDLEITVEDENGLEVTNEIVVQK | T | 3 | 3552.6631 | 3552.6718 | 0.0087  | 0       | 2.44  | 5.833 | 0.488 | 0   | 1 | 39 | 120 | 2 | 0 | 1 |
| Q5V7F4_HALMA | 1 | Cell surface glycoprotein | csg1 | pNG5138 | 887 | 51.9 | 99 | 2366 | 1 | R | ADYNFQEAEDLEITVEDENGLEVTNEIVVQK | T | 3 | 3552.6631 | 3552.6674 | 0.0043  | 0       | 1.20  | 4.439 | 0.473 | 0   | 1 | 32 | 120 | 2 | 0 | 1 |
| Q5V7F4_HALMA | 1 | Cell surface glycoprotein | csg1 | pNG5138 | 887 | 51.9 | 99 | 2366 | 1 | R | ADYNFQEAEDLEITVEDENGLEVTNEIVVQK | T | 3 | 3552.6631 | 3552.6765 | 0.0134  | 0       | 3.77  | 6.17  | 0.516 | 0   | 1 | 42 | 120 | 2 | 0 | 1 |
| Q5V7F4_HALMA | 1 | Cell surface glycoprotein | csg1 | pNG5138 | 887 | 51.9 | 99 | 2366 | 1 | R | ADYNFQEAEDLEITVEDENGLEVTNEIVVQK | T | 3 | 3552.6631 | 3552.6776 | 0.0145  | 0       | 4.08  | 4.63  | 0.436 | 0   | 1 | 34 | 120 | 2 | 0 | 1 |
| Q5V7F4_HALMA | 1 | Cell surface glycoprotein | csg1 | pNG5138 | 887 | 51.9 | 99 | 2366 | 1 | R | ADYNFQEAEDLEITVEDENGLEVTNEIVVQK | T | 2 | 3552.6631 | 3553.6852 | 1.0220  | -1.0034 | 5.26  | 3.443 | 0.532 | 0   | 1 | 17 | 60  | 2 | 0 | 1 |
| Q5V7F4_HALMA | 1 | Cell surface glycoprotein | csg1 | pNG5138 | 887 | 51.9 | 99 | 2366 | 1 | R | ADYNFQEAEDLEITVEDENGLEVTNEIVVQK | T | 3 | 3552.6631 | 3552.6619 | -0.0012 | 0       | -0.35 | 6.124 | 0.542 | 0   | 1 | 39 | 120 | 2 | 0 | 1 |
| Q5V7F4_HALMA | 1 | Cell surface glycoprotein | csg1 | pNG5138 | 887 | 51.9 | 99 | 2366 | 1 | R | ADYNFQEAEDLEITVEDENGLEVTNEIVVQK | T | 3 | 3552.6631 | 3552.6710 | 0.0079  | 0       | 2.23  | 6.006 | 0.559 | 0   | 1 | 43 | 120 | 2 | 0 | 1 |
| Q5V7F4_HALMA | 1 | Cell surface glycoprotein | csg1 | pNG5138 | 887 | 51.9 | 99 | 2366 | 1 | R | ADYNFQEAEDLEITVEDENGLEVTNEIVVQK | T | 3 | 3552.6631 | 3552.6751 | 0.0119  | 0       | 3.36  | 6.589 | 0.555 | 0   | 1 | 40 | 120 | 2 | 0 | 1 |
| Q5V7F4_HALMA | 1 | Cell surface glycoprotein | csg1 | pNG5138 | 887 | 51.9 | 99 | 2366 | 1 | R | ADYNFQEAEDLEITVEDENGLEVTNEIVVQK | T | 3 | 3552.6631 | 3554.6782 | 2.0150  | -2.0067 | 2.35  | 4.962 | 0.362 | 0   | 1 | 30 | 120 | 2 | 0 | 1 |
| Q5V7F4_HALMA | 1 | Cell surface glycoprotein | csg1 | pNG5138 | 887 | 51.9 | 99 | 2366 | 1 | R | ADYNFQEAEDLEITVEDENGLEVTNEIVVQK | T | 3 | 3552.6631 | 3552.6663 | 0.0032  | 0       | 0.89  | 4.028 | 0.445 | 0   | 1 | 29 | 120 | 2 | 0 | 1 |
| Q5V7F4_HALMA | 1 | Cell surface glycoprotein | csg1 | pNG5138 | 887 | 51.9 | 99 | 2366 | 1 | R | ADYNFQEAEDLEITVEDENGLEVTNEIVVQK | T | 3 | 3552.6631 | 3552.6699 | 0.0068  | 0       | 1.92  | 6.038 | 0.545 | 0   | 1 | 39 | 120 | 2 | 0 | 1 |
| Q5V7F4_HALMA | 1 | Cell surface glycoprotein | csg1 | pNG5138 | 887 | 51.9 | 99 | 2366 | 1 | R | ADYNFQEAEDLEITVEDENGLEVTNEIVVQK | T | 3 | 3552.6631 | 3552.6677 | 0.0046  | 0       | 1.30  | 5.874 | 0.553 | 0   | 1 | 39 | 120 | 2 | 0 | 1 |
| Q5V7F4_HALMA | 1 | Cell surface glycoprotein | csg1 | pNG5138 | 887 | 51.9 | 99 | 2366 | 1 | R | ADYNFQEAEDLEITVEDENGLEVTNEIVVQK | T | 3 | 3552.6631 | 3552.6703 | 0.0072  | 0       | 2.02  | 4.96  | 0.413 | 0   | 1 | 33 | 120 | 2 | 0 | 1 |
| Q5V7F4_HALMA | 1 | Cell surface glycoprotein | csg1 | pNG5138 | 887 | 51.9 | 99 | 2366 | 1 | R | ADYNFQEAEDLEITVEDENGLEVTNEIVVQK | T | 3 | 3552.6631 | 3552.6747 | 0.0116  | 0       | 3.26  | 6.116 | 0.49  | 0   | 1 | 40 | 120 | 2 | 0 | 1 |
| Q5V7F4_HALMA | 1 | Cell surface glycoprotein | csg1 | pNG5138 | 887 | 51.9 | 99 | 2366 | 1 | R | ADYNFQEAEDLEITVEDENGLEVTNEIVVQK | T | 3 | 3552.6631 | 3552.6641 | 0.0010  | 0       | 0.27  | 3.764 | 0.252 | 0.1 | 1 | 28 | 120 | 2 | 0 | 1 |
| Q5V7F4_HALMA | 1 | Cell surface glycoprotein | csg1 | pNG5138 | 887 | 51.9 | 99 | 2366 | 1 | R | ADYNFQEAEDLEITVEDENGLEVTNEIVVQK | T | 3 | 3552.6631 | 3552.6696 | 0.0065  | 0       | 1.82  | 5.529 | 0.508 | 0   | 1 | 28 | 120 | 2 | 0 | 1 |
| Q5V7F4_HALMA | 1 | Cell surface glycoprotein | csg1 | pNG5138 | 887 | 51.9 | 99 | 2366 | 1 | R | ADYNFQEAEDLEITVEDENGLEVTNEIVVQK | T | 3 | 3552.6631 | 3552.6806 | 0.0174  | 0       | 4.91  | 5.187 | 0.475 | 0   | 1 | 32 | 120 | 2 | 0 | 1 |
| Q5V7F4_HALMA | 1 | Cell surface glycoprotein | csg1 | pNG5138 | 887 | 51.9 | 99 | 2366 | 1 | R | ADYNFQEAEDLEITVEDENGLEVTNEIVVQK | T | 4 | 3552.6631 | 3552.6669 | 0.0038  | 0       | 1.07  | 5.251 | 0.339 | 0   | 1 | 48 | 180 | 2 | 0 | 1 |
| Q5V7F4_HALMA | 1 | Cell surface glycoprotein | csg1 | pNG5138 | 887 | 51.9 | 99 | 2366 | 1 | R | ADYNFQEAEDLEITVEDENGLEVTNEIVVQK | T | 3 | 3552.6631 | 3552.6696 | 0.0065  | 0       | 1.82  | 5.842 | 0.503 | 0   | 1 | 39 | 120 | 2 | 0 | 1 |
| Q5V7F4_HALMA | 1 | Cell surface glycoprotein | csg1 | pNG5138 | 887 | 51.9 | 99 | 2366 | 1 | R | ADYNFQEAEDLEITVEDENGLEVTNEIVVQK | T | 3 | 3552.6631 | 3552.6747 | 0.0116  | 0       | 3.26  | 6.363 | 0.535 | 0   | 1 | 33 | 120 | 2 | 0 | 1 |
| Q5V7F4_HALMA | 1 | Cell surface glycoprotein | csg1 | pNG5138 | 887 | 51.9 | 99 | 2366 | 1 | R | ADYNFQEAEDLEITVEDENGLEVTNEIVVQK | T | 4 | 3552.6631 | 3552.6582 | -0.0050 | 0       | -1.40 | 4.024 | 0.37  | 0.1 | 1 | 39 | 180 | 2 | 0 | 1 |
| Q5V7F4_HALMA | 1 | Cell surface glycoprotein | csg1 | pNG5138 | 887 | 51.9 | 99 | 2366 | 1 | R | ADYNFQEAEDLEITVEDENGLEVTNEIVVQK | T | 3 | 3552.6631 | 3552.6762 | 0.0130  | 0       | 3.67  | 6.01  | 0.514 | 0   | 1 | 41 | 120 | 2 | 0 | 1 |
| Q5V7F4_HALMA | 1 | Cell surface glycoprotein | csg1 | pNG5138 | 887 | 51.9 | 99 | 2366 | 1 | R | ADYNFQEAEDLEITVEDENGLEVTNEIVVQK | T | 3 | 3552.6631 | 3552.6765 | 0.0134  | 0       | 3.77  | 6.195 | 0.562 | 0   | 1 | 41 | 120 | 2 | 0 | 1 |
| Q5V7F4_HALMA | 1 | Cell surface glycoprotein | csg1 | pNG5138 | 887 | 51.9 | 99 | 2366 | 1 | R | ADYNFQEAEDLEITVEDENGLEVTNEIVVQK | T | 3 | 3552.6631 | 3554.6782 | 2.0150  | -2.0067 | 2.35  | 5.996 | 0.514 | 0   | 1 | 36 | 120 | 2 | 0 | 1 |
| Q5V7F4_HALMA | 1 | Cell surface glycoprotein | csg1 | pNG5138 | 887 | 51.9 | 99 | 2366 | 1 | R | ADYNFQEAEDLEITVEDENGLEVTNEIVVQK | T | 3 | 3552.6631 | 3552.6857 | 0.0226  | 0       | 6.35  | 4.805 | 0.368 | 0   | 2 | 26 | 120 | 2 | 0 | 1 |
| Q5V7F4_HALMA | 1 | Cell surface glycoprotein | csg1 | pNG5138 | 887 | 51.9 | 99 | 2366 | 1 | R | ADYNFQEAEDLEITVEDENGLEVTNEIVVQK | T | 3 | 3552.6631 | 3552.6780 | 0.0149  | 0       | 4.19  | 6.1   | 0.549 | 0   | 1 | 42 | 120 | 2 | 0 | 1 |
| Q5V7F4_HALMA | 1 | Cell surface glycoprotein | csg1 | pNG5138 | 887 | 51.9 | 99 | 2366 | 1 | R | ADYNFQEAEDLEITVEDENGLEVTNEIVVQK | T | 3 | 3552.6631 | 3552.6634 | 0.0002  | 0       | 0.06  | 5.221 | 0.472 | 0   | 1 | 30 | 120 | 2 | 0 | 1 |
| Q5V7F4_HALMA | 1 | Cell surface glycoprotein | csg1 | pNG5138 | 887 | 51.9 | 99 | 2366 | 1 | R | ADYNFQEAEDLEITVEDENGLEVTNEIVVQK | T | 3 | 3552.6631 | 3552.6659 | 0.0028  | 0       | 0.79  | 5.771 | 0.49  | 0   | 1 | 41 | 120 | 2 | 0 | 1 |
| Q5V7F4_HALMA | 1 | Cell surface glycoprotein | csg1 | pNG5138 | 887 | 51.9 | 99 | 2366 | 1 | R | ADYNFQEAEDLEITVEDENGLEVTNEIVVQK | T | 3 | 3552.6631 | 3552.6743 | 0.0112  | 0       | 3.16  | 5.63  | 0.478 | 0   | 1 | 37 | 120 | 2 | 0 | 1 |
| Q5V7F4_HALMA | 1 | Cell surface glycoprotein | csg1 | pNG5138 | 887 | 51.9 | 99 | 2366 | 1 | R | ADYNFQEAEDLEITVEDENGLEVTNEIVVQK | T | 4 | 3552.6631 | 3552.6772 | 0.0141  | 0       | 3.96  | 4.383 | 0.265 | 0.3 | 1 | 35 | 180 | 2 | 0 | 1 |
| Q5V7F4_HALMA | 1 | Cell surface glycoprotein | csg1 | pNG5138 | 887 | 51.9 | 99 | 2366 | 1 | R | ADYNFQEAEDLEITVEDENGLEVTNEIVVQK | T | 3 | 3552.6631 | 3552.6685 | 0.0054  | 0       | 1.51  | 5.966 | 0.515 | 0   | 1 | 37 | 120 | 2 | 0 | 1 |
| Q5V7F4_HALMA | 1 | Cell surface glycoprotein | csg1 | pNG5138 | 887 | 51.9 | 99 | 2366 | 1 | R | ADYNFQEAEDLEITVEDENGLEVTNEIVVQK | T | 4 | 3552.6631 | 3554.6779 | 2.0148  | -2.0067 | 2.28  | 3.684 | 0.292 | 0   | 1 | 45 | 180 | 2 | 0 | 1 |
| Q5V7F4_HALMA | 1 | Cell surface glycoprotein | csg1 | pNG5138 | 887 | 51.9 | 99 | 2366 | 1 | R | ADYNFQEAEDLEITVEDENGLEVTNEIVVQK | T | 4 | 3552.6631 | 3553.6762 | 1.0131  | -1.0034 | 2.74  | 6.646 | 0.529 | 0   | 1 | 58 | 180 | 2 | 0 | 1 |
| Q5V7F4_HALMA | 1 | Cell surface glycoprotein | csg1 | pNG5138 | 887 | 51.9 | 99 | 2366 | 1 | R | ADYNFQEAEDLEITVEDENGLEVTNEIVVQK | T | 3 | 3552.6631 | 3552.6670 | 0.0039  | 0       | 1.09  | 6.042 | 0.46  | 0   | 1 | 35 | 120 | 2 | 0 | 1 |
| Q5V7F4_HALMA | 1 | Cell surface glycoprotein | csg1 | pNG5138 | 887 | 51.9 | 99 | 2366 | 1 | R | ADYNFQEAEDLEITVEDENGLEVTNEIVVQK | T | 4 | 3552.6631 | 3553.6804 | 1.0172  | -1.0034 | 3.91  | 4.84  | 0.372 | 0   | 1 | 40 | 180 | 2 | 0 | 1 |
| Q5V7F4_HALMA | 1 | Cell surface glycoprotein | csg1 | pNG5138 | 887 | 51.9 | 99 | 2366 | 1 | R | ADYNFQEAEDLEITVEDENGLEVTNEIVVQK | T | 3 | 3552.6631 | 3552.6699 | 0.0068  | 0       | 1.92  | 6.844 | 0.501 | 0   | 1 | 39 | 120 | 2 | 0 | 1 |
| Q5V7F4_HALMA | 1 | Cell surface glycoprotein | csg1 | pNG5138 | 887 | 51.9 | 99 | 2366 | 1 | R | ADYNFQEAEDLEITVEDENGLEVTNEIVVQK | T | 3 | 3552.6631 | 3552.6524 | -0.0108 | 0       | -3.03 | 5.468 | 0.477 | 0   | 1 | 33 | 120 | 2 | 0 | 1 |
| Q5V7F4_HALMA | 1 | Cell surface glycoprotein | csg1 | pNG5138 | 887 | 51.9 | 99 | 2366 | 1 | R | ADYNFQEAEDLEITVEDENGLEVTNEIVVQK | T | 4 | 3552.6631 | 3553.6628 | 0.9997  | -1.0034 | -1.04 | 4.609 | 0.329 | 0   | 1 | 46 | 180 | 2 | 0 | 1 |
| Q5V7F4_HALMA | 1 | Cell surface glycoprotein | csg1 | pNG5138 | 887 | 51.9 | 99 | 2366 | 1 | R | ADYNFQEAEDLEITVEDENGLEVTNEIVVQK | T | 3 | 3552.6631 | 3552.6688 | 0.0057  | 0       | 1.61  | 6.102 | 0.549 | 0   | 1 | 40 | 120 | 2 | 0 | 1 |
| Q5V7F4_HALMA | 1 | Cell surface glycoprotein | csg1 | pNG5138 | 887 | 51.9 | 99 | 2366 | 1 | R | ADYNFQEAEDLEITVEDENGLEVTNEIVVQK | T | 3 | 3552.6631 | 3552.6747 | 0.0116  | 0       | 3.26  | 5.54  | 0.508 | 0   | 1 | 35 | 120 | 2 | 0 | 1 |
| Q5V7F4_HALMA | 1 | Cell surface glycoprotein | csg1 | pNG5138 | 887 | 51.9 | 99 | 2366 | 1 | R | ADYNFQEAEDLEITVEDENGLEVTNEIVVQK | T | 3 | 3552.6631 | 3552.6663 | 0.0032  | 0       | 0.89  | 4.27  | 0.43  | 0   | 1 | 27 | 120 | 2 | 0 | 1 |
| Q5V7F4_HALMA | 1 | Cell surface glycoprotein | csg1 | pNG5138 | 887 | 51.9 | 99 | 2366 | 1 | R | ADYNFQEAEDLEITVEDENGLEVTNEIVVQK | T | 4 | 3552.6631 | 3553.6662 | 1.0031  | -1.0034 | -0.08 | 4.435 | 0.325 | 0.1 | 2 | 38 | 180 | 2 | 0 | 1 |
| Q5V7F4_HALMA | 1 | Cell surface glycoprotein | csg1 | pNG5138 | 887 | 51.9 | 99 | 2366 | 1 | R | ADYNFQEAEDLEITVEDENGLEVTNEIVVQK | T | 3 | 3552.6631 | 3552.6597 | -0.0034 | 0       | -0.97 | 6.647 | 0.512 | 0   | 1 | 38 | 120 | 2 | 0 | 1 |
| Q5V7F4_HALMA | 1 | Cell surface glycoprotein | csg1 | pNG5138 | 887 | 51.9 | 99 | 2366 | 1 | R | ADYNFQEAEDLEITVEDENGLEVTNEIVVQK | T | 3 | 3552.6631 | 3552.6707 | 0.0076  | 0       | 2.13  | 5.596 | 0.498 | 0   | 1 | 42 | 120 | 2 | 0 | 1 |
| Q5V7F4_HAL   |   |                           |      |         |     |      |    |      |   |   |                                 |   |   |           |           |         |         |       |       |       |     |   |    |     |   |   |   |

|              |   |                           |      |         |     |      |    |      |   |   |                                 |   |   |           |           |         |         |       |       |       |     |   |    |     |   |   |   |
|--------------|---|---------------------------|------|---------|-----|------|----|------|---|---|---------------------------------|---|---|-----------|-----------|---------|---------|-------|-------|-------|-----|---|----|-----|---|---|---|
| Q5V7F4_HALMA | 1 | Cell surface glycoprotein | csg1 | pNG5138 | 887 | 51.9 | 99 | 2366 | 1 | R | ADYNFQEAEDLEITVEDENGLEVTNEIVVQK | T | 4 | 3552.6631 | 3553.6789 | 1.0158  | -1.0034 | 3.50  | 4.7   | 0.3   | 0   | 1 | 39 | 180 | 2 | 0 | 1 |
| Q5V7F4_HALMA | 1 | Cell surface glycoprotein | csg1 | pNG5138 | 887 | 51.9 | 99 | 2366 | 1 | R | ADYNFQEAEDLEITVEDENGLEVTNEIVVQK | T | 4 | 3552.6631 | 3553.6711 | 1.0080  | -1.0034 | 1.30  | 5.617 | 0.528 | 0   | 1 | 45 | 180 | 2 | 0 | 1 |
| Q5V7F4_HALMA | 1 | Cell surface glycoprotein | csg1 | pNG5138 | 887 | 51.9 | 99 | 2366 | 1 | R | ADYNFQEAEDLEITVEDENGLEVTNEIVVQK | T | 3 | 3552.6631 | 3552.6674 | 0.0043  | 0       | 1.20  | 6.075 | 0.535 | 0   | 1 | 41 | 120 | 2 | 0 | 1 |
| Q5V7F4_HALMA | 1 | Cell surface glycoprotein | csg1 | pNG5138 | 887 | 51.9 | 99 | 2366 | 1 | R | ADYNFQEAEDLEITVEDENGLEVTNEIVVQK | T | 4 | 3552.6631 | 3552.6972 | 0.0341  | 0       | 9.60  | 6.319 | 0.425 | 0   | 1 | 53 | 180 | 2 | 0 | 1 |
| Q5V7F4_HALMA | 1 | Cell surface glycoprotein | csg1 | pNG5138 | 887 | 51.9 | 99 | 2366 | 1 | R | ADYNFQEAEDLEITVEDENGLEVTNEIVVQK | T | 3 | 3552.6631 | 3552.6659 | 0.0028  | 0       | 0.79  | 6.069 | 0.533 | 0   | 1 | 38 | 120 | 2 | 0 | 1 |
| Q5V7F4_HALMA | 1 | Cell surface glycoprotein | csg1 | pNG5138 | 887 | 51.9 | 99 | 2366 | 1 | R | ADYNFQEAEDLEITVEDENGLEVTNEIVVQK | T | 3 | 3552.6631 | 3552.6754 | 0.0123  | 0       | 3.47  | 7.454 | 0.556 | 0   | 1 | 44 | 120 | 2 | 0 | 1 |
| Q5V7F4_HALMA | 1 | Cell surface glycoprotein | csg1 | pNG5138 | 887 | 51.9 | 99 | 2366 | 1 | R | ADYNFQEAEDLEITVEDENGLEVTNEIVVQK | T | 3 | 3552.6631 | 3552.6637 | 0.0006  | 0       | 0.17  | 6.613 | 0.479 | 0   | 1 | 39 | 120 | 2 | 0 | 1 |
| Q5V7F4_HALMA | 1 | Cell surface glycoprotein | csg1 | pNG5138 | 887 | 51.9 | 99 | 2366 | 1 | R | ADYNFQEAEDLEITVEDENGLEVTNEIVVQK | T | 4 | 3552.6631 | 3553.6645 | 1.0014  | -1.0034 | -0.56 | 6.155 | 0.504 | 0   | 1 | 51 | 180 | 2 | 0 | 1 |
| Q5V7F4_HALMA | 1 | Cell surface glycoprotein | csg1 | pNG5138 | 887 | 51.9 | 99 | 2366 | 1 | R | ADYNFQEAEDLEITVEDENGLEVTNEIVVQK | T | 3 | 3552.6631 | 3552.6601 | -0.0031 | 0       | -0.86 | 5.688 | 0.469 | 0   | 1 | 35 | 120 | 2 | 0 | 1 |
| Q5V7F4_HALMA | 1 | Cell surface glycoprotein | csg1 | pNG5138 | 887 | 51.9 | 99 | 2366 | 1 | R | ADYNFQEAEDLEITVEDENGLEVTNEIVVQK | T | 4 | 3552.6631 | 3552.6643 | 0.0011  | 0       | 0.32  | 4.292 | 0.28  | 0   | 1 | 41 | 180 | 2 | 0 | 1 |
| Q5V7F4_HALMA | 1 | Cell surface glycoprotein | csg1 | pNG5138 | 887 | 51.9 | 99 | 2366 | 1 | R | ADYNFQEAEDLEITVEDENGLEVTNEIVVQK | T | 3 | 3552.6631 | 3552.6725 | 0.0094  | 0       | 2.64  | 6.097 | 0.547 | 0   | 1 | 40 | 120 | 2 | 0 | 1 |
| Q5V7F4_HALMA | 1 | Cell surface glycoprotein | csg1 | pNG5138 | 887 | 51.9 | 99 | 2366 | 1 | R | ADYNFQEAEDLEITVEDENGLEVTNEIVVQK | T | 3 | 3552.6631 | 3552.6718 | 0.0087  | 0       | 2.44  | 6.524 | 0.538 | 0   | 1 | 41 | 120 | 2 | 0 | 1 |
| Q5V7F4_HALMA | 1 | Cell surface glycoprotein | csg1 | pNG5138 | 887 | 51.9 | 99 | 2366 | 1 | R | ADYNFQEAEDLEITVEDENGLEVTNEIVVQK | T | 4 | 3552.6631 | 3552.6508 | -0.0123 | 0       | -3.46 | 5.551 | 0.367 | 0   | 1 | 47 | 180 | 2 | 0 | 1 |
| Q5V7F4_HALMA | 1 | Cell surface glycoprotein | csg1 | pNG5138 | 887 | 51.9 | 99 | 2366 | 1 | R | ADYNFQEAEDLEITVEDENGLEVTNEIVVQK | T | 3 | 3552.6631 | 3552.6586 | -0.0045 | 0       | -1.28 | 6.301 | 0.561 | 0   | 1 | 41 | 120 | 2 | 0 | 1 |
| Q5V7F4_HALMA | 1 | Cell surface glycoprotein | csg1 | pNG5138 | 887 | 51.9 | 99 | 2366 | 1 | R | ADYNFQEAEDLEITVEDENGLEVTNEIVVQK | T | 3 | 3552.6631 | 3554.6782 | 2.0150  | -2.0067 | 2.35  | 4.115 | 0.318 | 0   | 1 | 30 | 120 | 2 | 0 | 1 |
| Q5V7F4_HALMA | 1 | Cell surface glycoprotein | csg1 | pNG5138 | 887 | 51.9 | 99 | 2366 | 1 | R | ADYNFQEAEDLEITVEDENGLEVTNEIVVQK | T | 4 | 3552.6631 | 3553.6833 | 1.0202  | -1.0034 | 4.74  | 4.395 | 0.382 | 0   | 1 | 49 | 180 | 2 | 0 | 1 |
| Q5V7F4_HALMA | 1 | Cell surface glycoprotein | csg1 | pNG5138 | 887 | 51.9 | 99 | 2366 | 1 | R | ADYNFQEAEDLEITVEDENGLEVTNEIVVQK | T | 3 | 3552.6631 | 3552.6630 | -0.0001 | 0       | -0.04 | 4.402 | 0.398 | 0   | 1 | 28 | 120 | 2 | 0 | 1 |
| Q5V7F4_HALMA | 1 | Cell surface glycoprotein | csg1 | pNG5138 | 887 | 51.9 | 99 | 2366 | 1 | R | ADYNFQEAEDLEITVEDENGLEVTNEIVVQK | T | 3 | 3552.6631 | 3552.6630 | -0.0001 | 0       | -0.04 | 6.487 | 0.491 | 0   | 1 | 41 | 120 | 2 | 0 | 1 |
| Q5V7F4_HALMA | 1 | Cell surface glycoprotein | csg1 | pNG5138 | 887 | 51.9 | 99 | 2366 | 1 | R | ADYNFQEAEDLEITVEDENGLEVTNEIVVQK | T | 3 | 3552.6631 | 3552.6634 | 0.0002  | 0       | 0.06  | 6.234 | 0.518 | 0   | 1 | 38 | 120 | 2 | 0 | 1 |
| Q5V7F4_HALMA | 1 | Cell surface glycoprotein | csg1 | pNG5138 | 887 | 51.9 | 99 | 2366 | 1 | R | ADYNFQEAEDLEITVEDENGLEVTNEIVVQK | T | 3 | 3552.6631 | 3552.6696 | 0.0065  | 0       | 1.82  | 6.471 | 0.466 | 0   | 1 | 38 | 120 | 2 | 0 | 1 |
| Q5V7F4_HALMA | 1 | Cell surface glycoprotein | csg1 | pNG5138 | 887 | 51.9 | 99 | 2366 | 1 | R | ADYNFQEAEDLEITVEDENGLEVTNEIVVQK | T | 3 | 3552.6631 | 3552.6762 | 0.0130  | 0       | 3.67  | 6.275 | 0.538 | 0   | 1 | 40 | 120 | 2 | 0 | 1 |
| Q5V7F4_HALMA | 1 | Cell surface glycoprotein | csg1 | pNG5138 | 887 | 51.9 | 99 | 2366 | 1 | R | ADYNFQEAEDLEITVEDENGLEVTNEIVVQK | T | 3 | 3552.6631 | 3552.6762 | 0.0130  | 0       | 3.67  | 4.598 | 0.468 | 0   | 1 | 34 | 120 | 2 | 0 | 1 |
| Q5V7F4_HALMA | 1 | Cell surface glycoprotein | csg1 | pNG5138 | 887 | 51.9 | 99 | 2366 | 1 | R | ADYNFQEAEDLEITVEDENGLEVTNEIVVQK | T | 4 | 3552.6631 | 3554.6909 | 2.0278  | -2.0067 | 5.93  | 5.908 | 0.577 | 0   | 1 | 47 | 180 | 2 | 0 | 1 |
| Q5V7F4_HALMA | 1 | Cell surface glycoprotein | csg1 | pNG5138 | 887 | 51.9 | 99 | 2366 | 1 | R | ADYNFQEAEDLEITVEDENGLEVTNEIVVQK | T | 3 | 3552.6631 | 3552.6703 | 0.0072  | 0       | 2.02  | 5.163 | 0.51  | 0   | 1 | 32 | 120 | 2 | 0 | 1 |
| Q5V7F4_HALMA | 1 | Cell surface glycoprotein | csg1 | pNG5138 | 887 | 51.9 | 99 | 2366 | 1 | R | ADYNFQEAEDLEITVEDENGLEVTNEIVVQK | T | 3 | 3552.6631 | 3552.6685 | 0.0054  | 0       | 1.51  | 6.582 | 0.568 | 0   | 1 | 45 | 120 | 2 | 0 | 1 |
| Q5V7F4_HALMA | 1 | Cell surface glycoprotein | csg1 | pNG5138 | 887 | 51.9 | 99 | 2366 | 1 | R | ADYNFQEAEDLEITVEDENGLEVTNEIVVQK | T | 3 | 3552.6631 | 3552.6685 | 0.0054  | 0       | 1.51  | 5.469 | 0.455 | 0   | 1 | 31 | 120 | 2 | 0 | 1 |
| Q5V7F4_HALMA | 1 | Cell surface glycoprotein | csg1 | pNG5138 | 887 | 51.9 | 99 | 2366 | 1 | R | ADYNFQEAEDLEITVEDENGLEVTNEIVVQK | T | 3 | 3552.6631 | 3552.6663 | 0.0032  | 0       | 0.89  | 6.759 | 0.549 | 0   | 1 | 38 | 120 | 2 | 0 | 1 |
| Q5V7F4_HALMA | 1 | Cell surface glycoprotein | csg1 | pNG5138 | 887 | 51.9 | 99 | 2366 | 1 | R | ADYNFQEAEDLEITVEDENGLEVTNEIVVQK | T | 3 | 3552.6631 | 3552.6751 | 0.0119  | 0       | 3.36  | 6.995 | 0.548 | 0   | 1 | 41 | 120 | 2 | 0 | 1 |
| Q5V7F4_HALMA | 1 | Cell surface glycoprotein | csg1 | pNG5138 | 887 | 51.9 | 99 | 2366 | 1 | R | ADYNFQEAEDLEITVEDENGLEVTNEIVVQK | T | 3 | 3552.6631 | 3552.6710 | 0.0079  | 0       | 2.23  | 6.848 | 0.579 | 0   | 1 | 39 | 120 | 2 | 0 | 1 |
| Q5V7F4_HALMA | 1 | Cell surface glycoprotein | csg1 | pNG5138 | 887 | 51.9 | 99 | 2366 | 1 | R | ADYNFQEAEDLEITVEDENGLEVTNEIVVQK | T | 4 | 3552.6631 | 3553.6818 | 1.0187  | -1.0034 | 4.32  | 5.389 | 0.354 | 0   | 1 | 41 | 180 | 2 | 0 | 1 |
| Q5V7F4_HALMA | 1 | Cell surface glycoprotein | csg1 | pNG5138 | 887 | 51.9 | 99 | 2366 | 1 | R | ADYNFQEAEDLEITVEDENGLEVTNEIVVQK | T | 4 | 3552.6631 | 3553.6772 | 1.0141  | -1.0034 | 3.02  | 4.955 | 0.339 | 0.2 | 1 | 39 | 180 | 2 | 0 | 1 |
| Q5V7F4_HALMA | 1 | Cell surface glycoprotein | csg1 | pNG5138 | 887 | 51.9 | 99 | 2366 | 1 | R | ADYNFQEAEDLEITVEDENGLEVTNEIVVQK | T | 4 | 3552.6631 | 3553.6509 | 0.9878  | -1.0034 | -4.39 | 4.311 | 0.319 | 0   | 2 | 36 | 180 | 2 | 0 | 1 |
| Q5V7F4_HALMA | 1 | Cell surface glycoprotein | csg1 | pNG5138 | 887 | 51.9 | 99 | 2366 | 1 | R | ADYNFQEAEDLEITVEDENGLEVTNEIVVQK | T | 3 | 3552.6631 | 3554.6782 | 2.0150  | -2.0067 | 2.35  | 6.002 | 0.5   | 0   | 1 | 37 | 120 | 2 | 0 | 1 |
| Q5V7F4_HALMA | 1 | Cell surface glycoprotein | csg1 | pNG5138 | 887 | 51.9 | 99 | 2366 | 1 | R | ADYNFQEAEDLEITVEDENGLEVTNEIVVQK | T | 3 | 3552.6631 | 3552.6666 | 0.0035  | 0       | 0.99  | 6.287 | 0.505 | 0   | 1 | 39 | 120 | 2 | 0 | 1 |
| Q5V7F4_HALMA | 1 | Cell surface glycoprotein | csg1 | pNG5138 | 887 | 51.9 | 99 | 2366 | 1 | R | ADYNFQEAEDLEITVEDENGLEVTNEIVVQK | T | 3 | 3552.6631 | 3552.6688 | 0.0057  | 0       | 1.61  | 3.607 | 0.337 | 0   | 1 | 28 | 120 | 2 | 0 | 1 |
| Q5V7F4_HALMA | 1 | Cell surface glycoprotein | csg1 | pNG5138 | 887 | 51.9 | 99 | 2366 | 1 | R | ADYNFQEAEDLEITVEDENGLEVTNEIVVQK | T | 3 | 3552.6631 | 3552.6831 | 0.0200  | 0       | 5.63  | 7.539 | 0.575 | 0   | 1 | 42 | 120 | 2 | 0 | 1 |
| Q5V7F4_HALMA | 1 | Cell surface glycoprotein | csg1 | pNG5138 | 887 | 51.9 | 99 | 2366 | 1 | R | ADYNFQEAEDLEITVEDENGLEVTNEIVVQK | T | 3 | 3552.6631 | 3553.6582 | 0.9950  | -1.0034 | -2.34 | 4.526 | 0.251 | 0   | 2 | 27 | 120 | 2 | 0 | 1 |
| Q5V7F4_HALMA | 1 | Cell surface glycoprotein | csg1 | pNG5138 | 887 | 51.9 | 99 | 2366 | 1 | R | ADYNFQEAEDLEITVEDENGLEVTNEIVVQK | T | 3 | 3552.6631 | 3552.6732 | 0.0101  | 0       | 2.85  | 4.282 | 0.413 | 0   | 1 | 28 | 120 | 2 | 0 | 1 |
| Q5V7F4_HALMA | 1 | Cell surface glycoprotein | csg1 | pNG5138 | 887 | 51.9 | 99 | 2366 | 1 | R | ADYNFQEAEDLEITVEDENGLEVTNEIVVQK | T | 4 | 3552.6631 | 3553.6821 | 1.0190  | -1.0034 | 4.39  | 6.202 | 0.493 | 0   | 1 | 50 | 180 | 2 | 0 | 1 |
| Q5V7F4_HALMA | 1 | Cell surface glycoprotein | csg1 | pNG5138 | 887 | 51.9 | 99 | 2366 | 1 | R | ADYNFQEAEDLEITVEDENGLEVTNEIVVQK | T | 3 | 3552.6631 | 3552.6659 | 0.0028  | 0       | 0.79  | 6.364 | 0.528 | 0   | 1 | 40 | 120 | 2 | 0 | 1 |
| Q5V7F4_HALMA | 1 | Cell surface glycoprotein | csg1 | pNG5138 | 887 | 51.9 | 99 | 2366 | 1 | R | ADYNFQEAEDLEITVEDENGLEVTNEIVVQK | T | 3 | 3552.6631 | 3552.6842 | 0.0211  | 0       | 5.94  | 6.369 | 0.53  | 0   | 1 | 38 | 120 | 2 | 0 | 1 |
| Q5V7F4_HALMA | 1 | Cell surface glycoprotein | csg1 | pNG5138 | 887 | 51.9 | 99 | 2366 | 1 | R | ADYNFQEAEDLEITVEDENGLEVTNEIVVQK | T | 3 | 3552.6631 | 3552.6637 | 0.0006  | 0       | 0.17  | 6.499 | 0.511 | 0   | 1 | 35 | 120 | 2 | 0 | 1 |
| Q5V7F4_HALMA | 1 | Cell surface glycoprotein | csg1 | pNG5138 | 887 | 51.9 | 99 | 2366 | 1 | R | ADYNFQEAEDLEITVEDENGLEVTNEIVVQK | T | 3 | 3552.6631 | 3552.6582 | -0.0049 | 0       | -1.38 | 6.203 | 0.529 | 0   | 1 | 36 | 120 | 2 | 0 | 1 |
| Q5V7F4_HALMA | 1 | Cell surface glycoprotein | csg1 | pNG5138 | 887 | 51.9 | 99 | 2366 | 1 | R | ADYNFQEAEDLEITVEDENGLEVTNEIVVQK | T | 3 | 3552.6631 | 3552.6714 | 0.0083  | 0       | 2.33  | 6.055 | 0.514 | 0   | 1 | 40 | 120 | 2 | 0 | 1 |
| Q5V7F4_HALMA | 1 | Cell surface glycoprotein | csg1 | pNG5138 | 887 | 51.9 | 99 | 2366 | 1 | R | ADYNFQEAEDLEITVEDENGLEVTNEIVVQK | T | 4 | 3552.6631 | 3553.6594 | 0.9962  | -1.0034 | -2.00 | 5.559 | 0.425 | 0   | 1 | 41 | 180 | 2 | 0 | 1 |
| Q5V7F4_HALMA | 1 | Cell surface glycoprotein | csg1 | pNG5138 | 887 | 51.9 | 99 | 2366 | 1 | R | ADYNFQEAEDLEITVEDENGLEVTNEIVVQK | T | 3 | 3552.6631 | 3552.6688 | 0.0057  | 0       | 1.61  | 3.914 | 0.306 | 0.2 | 1 | 25 | 120 | 2 | 0 | 1 |
| Q5V7F4_HALMA | 1 | Cell surface glycoprotein | csg1 | pNG5138 | 887 | 51.9 | 99 | 2366 | 1 | R | ADYNFQEAEDLEITVEDENGLEVTNEIVVQK | T | 3 | 3552.6631 | 3552.6645 | 0.0013  | 0       | 0.37  | 5.947 | 0.471 | 0   | 1 | 32 | 120 | 2 | 0 | 1 |
| Q5V7F4_HALMA | 1 | Cell surface glycoprotein | csg1 | pNG5138 | 887 | 51.9 | 99 | 2366 | 1 | R | ADYNFQEAEDLEITVEDENGLEVTNEIVVQK | T | 3 | 3552.6631 | 3552.6703 | 0.0072  | 0       | 2.02  | 6.298 | 0.581 | 0   | 1 | 38 | 120 | 2 | 0 | 1 |
| Q5V7F4_HALMA | 1 | Cell surface glycoprotein | csg1 | pNG5138 | 887 | 51.9 | 99 | 2366 | 1 | R | ADYNFQEAEDLEITVEDENGLEVTNEIVVQK | T | 3 | 3552.6631 | 3554.6782 | 2.0150  | -2.0067 | 2.35  | 6.088 | 0.533 | 0   | 1 | 41 | 120 | 2 | 0 | 1 |
| Q5V7F4_HALMA | 1 | Cell surface glycoprotein | csg1 | pNG5138 | 887 | 51.9 | 99 | 2366 | 1 | R | ADYNFQEAEDLEITVEDENGLEVTNEIVVQK | T | 4 | 3552.6631 | 3553.6684 | 1.0053  | -1.0034 | 0.54  | 4.134 | 0.346 | 0.1 | 1 | 43 | 180 | 2 |   |   |

|              |   |                           |      |         |     |      |    |      |        |   |                                    |   |   |           |           |         |         |         |       |       |     |    |    |     |   |   |   |
|--------------|---|---------------------------|------|---------|-----|------|----|------|--------|---|------------------------------------|---|---|-----------|-----------|---------|---------|---------|-------|-------|-----|----|----|-----|---|---|---|
| Q5V7F4_HALMA | 1 | Cell surface glycoprotein | csg1 | pNG5138 | 887 | 51.9 | 99 | 2366 | 1      | R | ADYNFQEAEDLEITVEDENGLEVTNEIVVQK    | T | 3 | 3552.6631 | 3552.6659 | 0.0028  | 0       | 0.79    | 6.133 | 0.534 | 0   | 1  | 37 | 120 | 2 | 0 | 1 |
| Q5V7F4_HALMA | 1 | Cell surface glycoprotein | csg1 | pNG5138 | 887 | 51.9 | 99 | 2366 | 1      | R | ADYNFQEAEDLEITVEDENGLEVTNEIVVQK    | T | 3 | 3552.6631 | 3552.6674 | 0.0043  | 0       | 1.20    | 7.113 | 0.574 | 0   | 1  | 37 | 120 | 2 | 0 | 1 |
| Q5V7F4_HALMA | 1 | Cell surface glycoprotein | csg1 | pNG5138 | 887 | 51.9 | 99 | 2366 | 1      | R | ADYNFQEAEDLEITVEDENGLEVTNEIVVQK    | T | 3 | 3552.6631 | 3554.6782 | 2.0150  | -2.0067 | 2.35    | 5.704 | 0.562 | 0   | 1  | 34 | 120 | 2 | 0 | 1 |
| Q5V7F4_HALMA | 1 | Cell surface glycoprotein | csg1 | pNG5138 | 887 | 51.9 | 99 | 2366 | 1      | R | ADYNFQEAEDLEITVEDENGLEVTNEIVVQK    | T | 3 | 3552.6631 | 3552.6666 | 0.0035  | 0       | 0.99    | 6.509 | 0.573 | 0   | 1  | 43 | 120 | 2 | 0 | 1 |
| Q5V7F4_HALMA | 1 | Cell surface glycoprotein | csg1 | pNG5138 | 887 | 51.9 | 99 | 2366 | 1      | R | ADYNFQEAEDLEITVEDENGLEVTNEIVVQK    | T | 3 | 3552.6631 | 3552.6732 | 0.0101  | 0       | 2.85    | 7.101 | 0.559 | 0   | 1  | 37 | 120 | 2 | 0 | 1 |
| Q5V7F4_HALMA | 1 | Cell surface glycoprotein | csg1 | pNG5138 | 887 | 51.9 | 99 | 2366 | 1      | R | ADYNFQEAEDLEITVEDENGLEVTNEIVVQK    | T | 3 | 3552.6631 | 3552.6776 | 0.0145  | 0       | 4.08    | 5.46  | 0.491 | 0   | 1  | 35 | 120 | 2 | 0 | 1 |
| Q5V7F4_HALMA | 1 | Cell surface glycoprotein | csg1 | pNG5138 | 887 | 51.9 | 99 | 2366 | 1      | R | ADYNFQEAEDLEITVEDENGLEVTNEIVVQK    | T | 4 | 3552.6631 | 3553.6511 | 0.9879  | -1.0034 | -4.34   | 6.345 | 0.37  | 0   | 1  | 51 | 180 | 2 | 0 | 1 |
| Q5V7F4_HALMA | 1 | Cell surface glycoprotein | csg1 | pNG5138 | 887 | 51.9 | 99 | 2366 | 1      | R | ADYNFQEAEDLEITVEDENGLEVTNEIVVQK    | T | 3 | 3552.6631 | 3552.6681 | 0.0050  | 0       | 1.40    | 5.439 | 0.502 | 0   | 1  | 31 | 120 | 2 | 0 | 1 |
| Q5V7F4_HALMA | 1 | Cell surface glycoprotein | csg1 | pNG5138 | 887 | 51.9 | 99 | 2366 | 0.9999 | R | ADYNFQEAEDLEITVEDENGLEVTNEIVVQK    | T | 4 | 3552.6631 | 3553.6909 | 1.0278  | -1.0034 | 6.87    | 4.208 | 0.323 | 0   | 8  | 36 | 180 | 2 | 0 | 1 |
| Q5V7F4_HALMA | 1 | Cell surface glycoprotein | csg1 | pNG5138 | 887 | 51.9 | 99 | 2366 | 0.9999 | R | ADYNFQEAEDLEITVEDENGLEVTNEIVVQK    | T | 3 | 3552.6631 | 3552.6732 | 0.0101  | 0       | 2.85    | 3.959 | 0.223 | 0   | 1  | 28 | 120 | 2 | 0 | 1 |
| Q5V7F4_HALMA | 1 | Cell surface glycoprotein | csg1 | pNG5138 | 887 | 51.9 | 99 | 2366 | 0.9999 | R | ADYNFQEAEDLEITVEDENGLEVTNEIVVQK    | T | 4 | 3552.6631 | 3553.6509 | 0.9878  | -1.0034 | -4.39   | 4.555 | 0.256 | 0   | 1  | 40 | 180 | 2 | 0 | 1 |
| Q5V7F4_HALMA | 1 | Cell surface glycoprotein | csg1 | pNG5138 | 887 | 51.9 | 99 | 2366 | 0.9999 | R | ADYNFQEAEDLEITVEDENGLEVTNEIVVQK    | T | 4 | 3552.6631 | 3553.6696 | 1.0065  | -1.0034 | 0.89    | 4.938 | 0.263 | 0   | 1  | 43 | 180 | 2 | 0 | 1 |
| Q5V7F4_HALMA | 1 | Cell surface glycoprotein | csg1 | pNG5138 | 887 | 51.9 | 99 | 2366 | 0.9998 | R | ADYNFQEAEDLEITVEDENGLEVTNEIVVQK    | T | 4 | 3552.6631 | 3552.6743 | 0.0111  | 0       | 3.14    | 3.765 | 0.159 | 0.3 | 1  | 41 | 180 | 2 | 0 | 1 |
| Q5V7F4_HALMA | 1 | Cell surface glycoprotein | csg1 | pNG5138 | 887 | 51.9 | 99 | 2366 | 0.9998 | R | ADYNFQEAEDLEITVEDENGLEVTNEIVVQK    | T | 3 | 3552.6631 | 3552.6634 | 0.0002  | 0       | 0.06    | 3.005 | 0.249 | 0.4 | 3  | 24 | 120 | 2 | 0 | 1 |
| Q5V7F4_HALMA | 1 | Cell surface glycoprotein | csg1 | pNG5138 | 887 | 51.9 | 99 | 2366 | 0.9998 | R | ADYNFQEAEDLEITVEDENGLEVTNEIVVQK    | T | 3 | 3552.6631 | 3553.6582 | 0.9950  | -1.0034 | -2.34   | 3.256 | 0.253 | 0   | 1  | 29 | 120 | 2 | 0 | 1 |
| Q5V7F4_HALMA | 1 | Cell surface glycoprotein | csg1 | pNG5138 | 887 | 51.9 | 99 | 2366 | 0.9998 | R | ADYNFQEAEDLEITVEDENGLEVTNEIVVQK    | T | 4 | 3552.6631 | 3553.6909 | 1.0278  | -1.0034 | 6.87    | 3.321 | 0.223 | 0.4 | 1  | 38 | 180 | 2 | 0 | 1 |
| Q5V7F4_HALMA | 1 | Cell surface glycoprotein | csg1 | pNG5138 | 887 | 51.9 | 99 | 2366 | 0.9998 | R | ADYNFQEAEDLEITVEDENGLEVTNEIVVQK    | T | 3 | 3552.6631 | 3552.6754 | 0.0123  | 0       | 3.47    | 3.244 | 0.241 | 0.1 | 3  | 23 | 120 | 2 | 0 | 1 |
| Q5V7F4_HALMA | 1 | Cell surface glycoprotein | csg1 | pNG5138 | 887 | 51.9 | 99 | 2366 | 0.9998 | R | ADYNFQEAEDLEITVEDENGLEVTNEIVVQK    | T | 4 | 3552.6631 | 3553.6621 | 0.9989  | -1.0034 | -1.24   | 4.401 | 0.235 | 0   | 2  | 38 | 180 | 2 | 0 | 1 |
| Q5V7F4_HALMA | 1 | Cell surface glycoprotein | csg1 | pNG5138 | 887 | 51.9 | 99 | 2366 | 0.9997 | R | ADYNFQEAEDLEITVEDENGLEVTNEIVVQK    | T | 4 | 3552.6631 | 3553.6509 | 0.9878  | -1.0034 | -4.39   | 4.427 | 0.298 | 0.1 | 19 | 34 | 180 | 2 | 0 | 1 |
| Q5V7F4_HALMA | 1 | Cell surface glycoprotein | csg1 | pNG5138 | 887 | 51.9 | 99 | 2366 | 0.9997 | R | ADYNFQEAEDLEITVEDENGLEVTNEIVVQK    | T | 3 | 3552.6631 | 3552.6641 | 0.0010  | 0       | 0.27    | 3.176 | 0.245 | 0.1 | 6  | 25 | 120 | 2 | 0 | 1 |
| Q5V7F4_HALMA | 1 | Cell surface glycoprotein | csg1 | pNG5138 | 887 | 51.9 | 99 | 2366 | 0.9997 | R | ADYNFQEAEDLEITVEDENGLEVTNEIVVQK    | T | 4 | 3552.6631 | 3554.6652 | 2.0021  | -2.0067 | -1.29   | 4.019 | 0.249 | 0.1 | 6  | 37 | 180 | 2 | 0 | 1 |
| Q5V7F4_HALMA | 1 | Cell surface glycoprotein | csg1 | pNG5138 | 887 | 51.9 | 99 | 2366 | 0.9997 | R | ADYNFQEAEDLEITVEDENGLEVTNEIVVQK    | T | 3 | 3552.6631 | 3553.6832 | 1.0201  | -1.0034 | 4.72    | 3.052 | 0.256 | 0   | 1  | 27 | 120 | 2 | 0 | 1 |
| Q5V7F4_HALMA | 1 | Cell surface glycoprotein | csg1 | pNG5138 | 887 | 51.9 | 99 | 2366 | 0.9996 | R | ADYNFQEAEDLEITVEDENGLEVTNEIVVQK    | T | 3 | 3552.6631 | 3553.6882 | 1.0250  | -1.0034 | 6.11    | 3.422 | 0.223 | 0.7 | 1  | 27 | 120 | 2 | 0 | 1 |
| Q5V7F4_HALMA | 1 | Cell surface glycoprotein | csg1 | pNG5138 | 887 | 51.9 | 99 | 2366 | 0.9992 | R | ADYNFQEAEDLEITVEDENGLEVTNEIVVQK    | T | 4 | 3552.6631 | 3553.6518 | 0.9887  | -1.0034 | -4.13   | 3.914 | 0.156 | 0.4 | 1  | 38 | 180 | 2 | 0 | 1 |
| Q5V7F4_HALMA | 1 | Cell surface glycoprotein | csg1 | pNG5138 | 887 | 51.9 | 99 | 2366 | 0.9986 | R | ADYNFQEAEDLEITVEDENGLEVTNEIVVQK    | T | 3 | 3552.6631 | 3553.6829 | 1.0198  | -1.0034 | 4.62    | 2.94  | 0.221 | 0.1 | 2  | 26 | 120 | 2 | 0 | 1 |
| Q5V7F4_HALMA | 1 | Cell surface glycoprotein | csg1 | pNG5138 | 887 | 51.9 | 99 | 2366 | 0.9982 | R | ADYNFQEAEDLEITVEDENGLEVTNEIVVQK    | T | 2 | 3552.6631 | 3553.6742 | 1.0110  | -1.0034 | 2.17    | 2.265 | 0.298 | 0   | 1  | 15 | 60  | 2 | 0 | 1 |
| Q5V7F4_HALMA | 1 | Cell surface glycoprotein | csg1 | pNG5138 | 887 | 51.9 | 99 | 2366 | 0.9975 | R | ADYNFQEAEDLEITVEDENGLEVTNEIVVQK    | T | 4 | 3552.6631 | 3553.6757 | 1.0126  | -1.0034 | 2.61    | 3.859 | 0.109 | 0.2 | 1  | 43 | 180 | 2 | 0 | 1 |
| Q5V7F4_HALMA | 1 | Cell surface glycoprotein | csg1 | pNG5138 | 887 | 51.9 | 99 | 2366 | 0.9973 | R | ADYNFQEAEDLEITVEDENGLEVTNEIVVQK    | T | 4 | 3552.6631 | 3553.6552 | 0.9921  | -1.0034 | -3.17   | 3.575 | 0.258 | 0.4 | 51 | 32 | 180 | 2 | 0 | 1 |
| Q5V7F4_HALMA | 1 | Cell surface glycoprotein | csg1 | pNG5138 | 887 | 51.9 | 99 | 2366 | 0.9969 | R | ADYNFQEAEDLEITVEDENGLEVTNEIVVQK    | T | 4 | 3552.6631 | 3553.6621 | 0.9989  | -1.0034 | -1.24   | 3.841 | 0.1   | 0.7 | 1  | 38 | 180 | 2 | 0 | 1 |
| Q5V7F4_HALMA | 1 | Cell surface glycoprotein | csg1 | pNG5138 | 887 | 51.9 | 99 | 2366 | 0.9951 | R | ADYNFQEAEDLEITVEDENGLEVTNEIVVQK    | T | 3 | 3552.6631 | 3552.6743 | 0.0112  | 0       | 3.16    | 3.213 | 0.112 | 0.2 | 3  | 25 | 120 | 2 | 0 | 1 |
| Q5V7F4_HALMA | 1 | Cell surface glycoprotein | csg1 | pNG5138 | 887 | 51.9 | 99 | 2366 | 0.9949 | R | ADYNFQEAEDLEITVEDENGLEVTNEIVVQK    | T | 3 | 3552.6631 | 3552.6758 | 0.0127  | 0       | 3.57    | 3.476 | 0.115 | 0.8 | 10 | 23 | 120 | 2 | 0 | 1 |
| Q5V7F4_HALMA | 1 | Cell surface glycoprotein | csg1 | pNG5138 | 887 | 51.9 | 99 | 2366 | 0.9949 | R | ADYNFQEAEDLEITVEDENGLEVTNEIVVQK    | T | 3 | 3552.6631 | 3552.6637 | 0.0006  | 0       | 0.17    | 3.159 | 0.094 | 0.4 | 1  | 27 | 120 | 2 | 0 | 1 |
| Q5V7F4_HALMA | 1 | Cell surface glycoprotein | csg1 | pNG5138 | 887 | 51.9 | 99 | 2366 | 0.9946 | R | ADYNFQEAEDLEITVEDENGLEVTNEIVVQK    | T | 3 | 3552.6631 | 3552.6677 | 0.0046  | 0       | 1.30    | 2.888 | 0.124 | 0.9 | 2  | 23 | 120 | 2 | 0 | 1 |
| Q5V7F4_HALMA | 1 | Cell surface glycoprotein | csg1 | pNG5138 | 887 | 51.9 | 99 | 2366 | 0.9936 | R | ADYNFQEAEDLEITVEDENGLEVTNEIVVQK    | T | 4 | 3552.6631 | 3553.6655 | 1.0024  | -1.0034 | -0.28   | 3.324 | 0.136 | 1.6 | 5  | 36 | 180 | 2 | 0 | 1 |
| Q5V7F4_HALMA | 1 | Cell surface glycoprotein | csg1 | pNG5138 | 887 | 51.9 | 99 | 2366 | 0.9926 | R | ADYNFQEAEDLEITVEDENGLEVTNEIVVQK    | T | 2 | 3552.6631 | 3554.6817 | 2.0186  | -2.0067 | 3.35    | 2.197 | 0.244 | 0.1 | 1  | 15 | 60  | 2 | 0 | 1 |
| Q5V7F4_HALMA | 1 | Cell surface glycoprotein | csg1 | pNG5138 | 887 | 51.9 | 99 | 2366 | 0.9917 | R | ADYNFQEAEDLEITVEDENGLEVTNEIVVQK    | T | 2 | 3552.6631 | 3553.6627 | 0.9996  | -1.0034 | -1.06   | 1.906 | 0.278 | 0   | 1  | 15 | 60  | 2 | 0 | 1 |
| Q5V7F4_HALMA | 1 | Cell surface glycoprotein | csg1 | pNG5138 | 887 | 51.9 | 99 | 2366 | 0.9862 | R | ADYNFQEAEDLEITVEDENGLEVTNEIVVQK    | T | 3 | 3552.6631 | 3553.6882 | 1.0250  | -1.0034 | 6.11    | 3.269 | 0.141 | 1.2 | 13 | 24 | 120 | 2 | 0 | 1 |
| Q5V7F4_HALMA | 1 | Cell surface glycoprotein | csg1 | pNG5138 | 887 | 51.9 | 99 | 2366 | 0.9861 | R | ADYNFQEAEDLEITVEDENGLEVTNEIVVQK    | T | 3 | 3552.6631 | 3552.6699 | 0.0068  | 0       | 1.92    | 2.496 | 0.148 | 0.8 | 13 | 23 | 120 | 2 | 0 | 1 |
| Q5V7F4_HALMA | 1 | Cell surface glycoprotein | csg1 | pNG5138 | 887 | 51.9 | 99 | 2366 | 0.9771 | R | ADYNFQEAEDLEITVEDENGLEVTNEIVVQK    | T | 3 | 3552.6631 | 3552.6641 | 0.0010  | 0       | 0.27    | 2.536 | 0.086 | 0.3 | 2  | 24 | 120 | 2 | 0 | 1 |
| Q5V7F4_HALMA | 1 | Cell surface glycoprotein | csg1 | pNG5138 | 887 | 51.9 | 99 | 2366 | 0.9389 | R | ADYNFQEAEDLEITVEDENGLEVTNEIVVQK    | T | 3 | 3552.6631 | 3552.6696 | 0.0065  | 0       | 1.82    | 2.838 | 0.021 | 7   | 4  | 27 | 120 | 2 | 0 | 1 |
| Q5V7F4_HALMA | 1 | Cell surface glycoprotein | csg1 | pNG5138 | 887 | 51.9 | 99 | 2366 | 0.9157 | R | ADYNFQEAEDLEITVEDENGLEVTNEIVVQK    | T | 3 | 3552.6631 | 3552.6699 | 0.0068  | 0       | 1.92    | 2.607 | 0.014 | 1.6 | 3  | 25 | 120 | 2 | 0 | 1 |
| Q5V7F4_HALMA | 1 | Cell surface glycoprotein | csg1 | pNG5138 | 887 | 51.9 | 99 | 2366 | 0.9875 | V | DDTASDDLIVNEQFR                    | L | 2 | 1736.7853 | 1737.5054 | 0.7201  | -1.0034 | -163.07 | 2.236 | 0.44  | 0   | 1  | 13 | 28  | 1 | 0 | 1 |
| Q5V7F4_HALMA | 1 | Cell surface glycoprotein | csg1 | pNG5138 | 887 | 51.9 | 99 | 2366 | 1      | R | DGEYDGTGTSSDSAFVNTIETGYAGGSSTGDQVR | E | 3 | 3400.4451 | 3400.4437 | -0.0014 | 0       | -0.40   | 4.38  | 0.365 | 0   | 1  | 30 | 132 | 2 | 0 | 1 |
| Q5V7F4_HALMA | 1 | Cell surface glycoprotein | csg1 | pNG5138 | 887 | 51.9 | 99 | 2366 | 1      | R | DGEYDGTGTSSDSAFVNTIETGYAGGSSTGDQVR | E | 3 | 3400.4451 | 3400.4547 | 0.0096  | 0       | 2.83    | 5.009 | 0.466 | 0   | 1  | 35 | 132 | 2 | 0 | 1 |
| Q5V7F4_HALMA | 1 | Cell surface glycoprotein | csg1 | pNG5138 | 887 | 51.9 | 99 | 2366 | 1      | R | DGEYDGTGTSSDSAFVNTIETGYAGGSSTGDQVR | E | 3 | 3400.4451 | 3400.4478 | 0.0027  | 0       | 0.78    | 5.704 | 0.509 | 0   | 1  | 41 | 132 | 2 | 0 | 1 |
| Q5V7F4_HALMA | 1 | Cell surface glycoprotein | csg1 | pNG5138 | 887 | 51.9 | 99 | 2366 | 1      | R | DGEYDGTGTSSDSAFVNTIETGYAGGSSTGDQVR | E | 4 | 3400.4451 | 3400.4450 | -0.0001 | 0       | -0.03   | 3.756 | 0.326 | 0.1 | 8  | 37 | 198 | 2 | 0 | 1 |
| Q5V7F4_HALMA | 1 | Cell surface glycoprotein | csg1 | pNG5138 | 887 | 51.9 | 99 | 2366 | 1      | R | DGEYDGTGTSSDSAFVNTIETGYAGGSSTGDQVR | E | 3 | 3400.4451 | 3401.4682 | 1.0230  | -1.0034 | 5.79    | 5.704 | 0.528 | 0   | 1  | 36 | 132 | 2 | 0 | 1 |
| Q5V7F4_HALMA | 1 | Cell surface glycoprotein | csg1 | pNG5138 | 887 | 51.9 | 99 | 2366 | 1      | R | DGEYDGTGTSSDSAFVNTIETGYAGGSSTGDQVR | E | 3 | 3400.4451 | 3401.4682 | 1.0230  | -1.0034 | 5.79    | 3.297 | 0.315 | 0   | 1  | 28 | 132 | 2 | 0 | 1 |
| Q5V7F4_HALMA | 1 | Cell surface glycoprotein | csg1 | pNG5138 | 887 | 51.9 | 99 | 2366 | 1      | R | DGEYDGTGTSSDSAFVNTIETGYAGGSSTGDQVR | E | 3 | 3400.4451 | 3401.4682 | 1.0230  | -1.0034 | 5.79    | 4.087 | 0.443 |     |    |    |     |   |   |   |

|              |   |                           |      |         |     |      |    |      |        |   |                                       |   |   |           |           |         |         |       |       |       |     |     |    |     |   |   |   |
|--------------|---|---------------------------|------|---------|-----|------|----|------|--------|---|---------------------------------------|---|---|-----------|-----------|---------|---------|-------|-------|-------|-----|-----|----|-----|---|---|---|
| Q5V7F4_HALMA | 1 | Cell surface glycoprotein | csgl | pNG5138 | 887 | 51.9 | 99 | 2366 | 0.9997 | R | DGEYGDGTGTSSDSAFVNTIETGYAGGSSTGDQVR   | E | 3 | 3400.4451 | 3401.4682 | 1.0230  | -1.0034 | 5.79  | 3.172 | 0.246 | 0.1 | 1   | 29 | 132 | 2 | 0 | 1 |
| Q5V7F4_HALMA | 1 | Cell surface glycoprotein | csgl | pNG5138 | 887 | 51.9 | 99 | 2366 | 0.9997 | R | DGEYGDGTSSDSAFVNTIETGYAGGSSTGDQVR     | E | 3 | 3400.4451 | 3400.4496 | 0.0045  | 0       | 1.32  | 3.296 | 0.195 | 0   | 1   | 27 | 132 | 2 | 0 | 1 |
| Q5V7F4_HALMA | 1 | Cell surface glycoprotein | csgl | pNG5138 | 887 | 51.9 | 99 | 2366 | 0.9997 | R | DGEYGDGTGTSSDSAFVNTIETGYAGGSSTGDQVR   | E | 3 | 3400.4451 | 3400.4397 | -0.0054 | 0       | -1.59 | 3.028 | 0.234 | 0.2 | 2   | 25 | 132 | 2 | 0 | 1 |
| Q5V7F4_HALMA | 1 | Cell surface glycoprotein | csgl | pNG5138 | 887 | 51.9 | 99 | 2366 | 0.9987 | R | DGEYGDGTGTSSDSAFVNTIETGYAGGSSTGDQVR   | E | 3 | 3400.4451 | 3400.4474 | 0.0023  | 0       | 0.67  | 3.365 | 0.148 | 0   | 2   | 26 | 132 | 2 | 0 | 1 |
| Q5V7F4_HALMA | 1 | Cell surface glycoprotein | csgl | pNG5138 | 887 | 51.9 | 99 | 2366 | 0.9963 | R | DGEYGDGTGTSSDSAFVNTIETGYAGGSSTGDQVR   | E | 3 | 3400.4451 | 3402.4359 | 1.9908  | -2.0067 | -4.67 | 3.148 | 0.188 | 0.1 | 6   | 30 | 132 | 2 | 0 | 1 |
| Q5V7F4_HALMA | 1 | Cell surface glycoprotein | csgl | pNG5138 | 887 | 51.9 | 99 | 2366 | 0.9899 | R | DGEYGDGTGTSSDSAFVNTIETGYAGGSSTGDQVR   | E | 3 | 3400.4451 | 3400.4646 | 0.0195  | 0       | 5.73  | 2.882 | 0.164 | 0.2 | 78  | 21 | 132 | 2 | 0 | 1 |
| Q5V7F4_HALMA | 1 | Cell surface glycoprotein | csgl | pNG5138 | 887 | 51.9 | 99 | 2366 | 0.9876 | R | DGEYGDGTGTSSDSAFVNTIETGYAGGSSTGDQVR   | E | 3 | 3400.4451 | 3401.4618 | 1.0167  | -1.0034 | 3.92  | 3.035 | 0.115 | 0.1 | 1   | 29 | 132 | 2 | 0 | 1 |
| Q5V7F4_HALMA | 1 | Cell surface glycoprotein | csgl | pNG5138 | 887 | 51.9 | 99 | 2366 | 0.9681 | R | DGEYGDGTGTSSDSAFVNTIETGYAGGSSTGDQVR   | E | 3 | 3400.4451 | 3400.4372 | -0.0080 | 0       | -2.34 | 2.647 | 0.138 | 0.4 | 141 | 22 | 132 | 2 | 0 | 1 |
| Q5V7F4_HALMA | 1 | Cell surface glycoprotein | csgl | pNG5138 | 887 | 51.9 | 99 | 2366 | 0.9627 | R | DGEYGDGTGTSSDSAFVNTIETGYAGGSSTGDQVR   | E | 3 | 3400.4451 | 3401.4571 | 1.0119  | -1.0034 | 2.52  | 2.516 | 0.107 | 1.2 | 1   | 26 | 132 | 2 | 0 | 1 |
| Q5V7F4_HALMA | 1 | Cell surface glycoprotein | csgl | pNG5138 | 887 | 51.9 | 99 | 2366 | 0.9999 | E | DGGNFGSNTDIGQLQK                      | V | 2 | 1649.7645 | 1649.7662 | 0.0017  | 0       | 1.02  | 3.581 | 0.418 | 0   | 1   | 18 | 30  | 1 | 0 | 1 |
| Q5V7F4_HALMA | 1 | Cell surface glycoprotein | csgl | pNG5138 | 887 | 51.9 | 99 | 2366 | 0.9996 | N | DGYASGGSHASSVTVR                      | D | 2 | 1549.7121 | 1549.7124 | 0.0003  | 0       | 0.16  | 2.843 | 0.445 | 0   | 1   | 17 | 30  | 1 | 0 | 1 |
| Q5V7F4_HALMA | 1 | Cell surface glycoprotein | csgl | pNG5138 | 887 | 51.9 | 99 | 2366 | 0.9970 | N | DGYASGGSHASSVTVR                      | D | 2 | 1549.7121 | 1549.7254 | 0.0133  | 0       | 8.60  | 2.208 | 0.425 | 0   | 1   | 13 | 30  | 1 | 0 | 1 |
| Q5V7F4_HALMA | 1 | Cell surface glycoprotein | csgl | pNG5138 | 887 | 51.9 | 99 | 2366 | 0.9930 | N | DGYASGGSHASSVTVR                      | D | 2 | 1549.7121 | 1550.7054 | 0.9933  | -1.0034 | -6.47 | 2.417 | 0.444 | 0   | 1   | 15 | 30  | 1 | 0 | 1 |
| Q5V7F4_HALMA | 1 | Cell surface glycoprotein | csgl | pNG5138 | 887 | 51.9 | 99 | 2366 | 0.9301 | N | DGYASGGSHASSVTVR                      | D | 2 | 1549.7121 | 1549.7454 | 0.0333  | 0       | 21.50 | 1.788 | 0.344 | 0   | 2   | 10 | 30  | 1 | 0 | 1 |
| Q5V7F4_HALMA | 1 | Cell surface glycoprotein | csgl | pNG5138 | 887 | 51.9 | 99 | 2366 | 0.9996 | D | DLIVNEQFR                             | L | 2 | 1132.5876 | 1132.5886 | 0.0010  | 0       | 0.86  | 3.446 | 0.297 | 0   | 1   | 15 | 16  | 1 | 0 | 1 |
| Q5V7F4_HALMA | 1 | Cell surface glycoprotein | csgl | pNG5138 | 887 | 51.9 | 99 | 2366 | 0.9989 | D | DLIVNEQFR                             | L | 2 | 1132.5876 | 1132.5891 | 0.0015  | 0       | 1.29  | 2.896 | 0.309 | 0   | 1   | 15 | 16  | 1 | 0 | 1 |
| Q5V7F4_HALMA | 1 | Cell surface glycoprotein | csgl | pNG5138 | 887 | 51.9 | 99 | 2366 | 0.9986 | D | DLIVNEQFR                             | L | 2 | 1132.5876 | 1132.5877 | 0.0001  | 0       | 0.10  | 2.775 | 0.313 | 0   | 1   | 15 | 16  | 1 | 0 | 1 |
| Q5V7F4_HALMA | 1 | Cell surface glycoprotein | csgl | pNG5138 | 887 | 51.9 | 99 | 2366 | 0.9976 | D | DLIVNEQFR                             | L | 2 | 1132.5876 | 1132.5896 | 0.0019  | 0       | 1.72  | 2.636 | 0.306 | 0   | 1   | 15 | 16  | 1 | 0 | 1 |
| Q5V7F4_HALMA | 1 | Cell surface glycoprotein | csgl | pNG5138 | 887 | 51.9 | 99 | 2366 | 1      | R | DNNDYELIEIDGSNTVSVGDGDTFSEEDVVLSSQGSK | G | 3 | 3904.7134 | 3906.7282 | 2.0147  | -2.0067 | 2.06  | 4.357 | 0.348 | 0   | 1   | 26 | 140 | 2 | 0 | 1 |
| Q5V7F4_HALMA | 1 | Cell surface glycoprotein | csgl | pNG5138 | 887 | 51.9 | 99 | 2366 | 1      | R | DNNDYELIEIDGSNTVSVGDGDTFSEEDVVLSSQGSK | G | 3 | 3904.7134 | 3906.7282 | 2.0147  | -2.0067 | 2.06  | 4.941 | 0.42  | 0   | 1   | 29 | 140 | 2 | 0 | 1 |
| Q5V7F4_HALMA | 1 | Cell surface glycoprotein | csgl | pNG5138 | 887 | 51.9 | 99 | 2366 | 1      | R | DNNDYELIEIDGSNTVSVGDGDTFSEEDVVLSSQGSK | G | 3 | 3904.7134 | 3906.7282 | 2.0147  | -2.0067 | 2.06  | 3.777 | 0.323 | 0   | 2   | 28 | 140 | 2 | 0 | 1 |
| Q5V7F4_HALMA | 1 | Cell surface glycoprotein | csgl | pNG5138 | 887 | 51.9 | 99 | 2366 | 1      | R | DNNDYELIEIDGSNTVSVGDGDTFSEEDVVLSSQGSK | G | 3 | 3904.7134 | 3906.7282 | 2.0147  | -2.0067 | 2.06  | 3.614 | 0.333 | 0.1 | 2   | 28 | 140 | 2 | 0 | 1 |
| Q5V7F4_HALMA | 1 | Cell surface glycoprotein | csgl | pNG5138 | 887 | 51.9 | 99 | 2366 | 1      | R | DNNDYELIEIDGSNTVSVGDGDTFSEEDVVLSSQGSK | G | 3 | 3904.7134 | 3906.6982 | 1.9847  | -2.0067 | -5.62 | 4.489 | 0.358 | 0   | 1   | 30 | 140 | 2 | 0 | 1 |
| Q5V7F4_HALMA | 1 | Cell surface glycoprotein | csgl | pNG5138 | 887 | 51.9 | 99 | 2366 | 0.9999 | R | DNNDYELIEIDGSNTVSVGDGDTFSEEDVVLSSQGSK | G | 3 | 3904.7134 | 3906.7282 | 2.0147  | -2.0067 | 2.06  | 3.694 | 0.313 | 0   | 8   | 25 | 140 | 2 | 0 | 1 |
| Q5V7F4_HALMA | 1 | Cell surface glycoprotein | csgl | pNG5138 | 887 | 51.9 | 99 | 2366 | 0.9997 | R | DNNDYELIEIDGSNTVSVGDGDTFSEEDVVLSSQGSK | G | 3 | 3904.7134 | 3904.7221 | 0.0086  | 0       | 2.21  | 3.811 | 0.169 | 0   | 1   | 30 | 140 | 2 | 0 | 1 |
| Q5V7F4_HALMA | 1 | Cell surface glycoprotein | csgl | pNG5138 | 887 | 51.9 | 99 | 2366 | 0.9997 | R | DNNDYELIEIDGSNTVSVGDGDTFSEEDVVLSSQGSK | G | 3 | 3904.7134 | 3906.7282 | 2.0147  | -2.0067 | 2.06  | 3.431 | 0.232 | 0.1 | 1   | 27 | 140 | 2 | 0 | 1 |
| Q5V7F4_HALMA | 1 | Cell surface glycoprotein | csgl | pNG5138 | 887 | 51.9 | 99 | 2366 | 0.9997 | R | DNNDYELIEIDGSNTVSVGDGDTFSEEDVVLSSQGSK | G | 3 | 3904.7134 | 3906.7282 | 2.0147  | -2.0067 | 2.06  | 4.212 | 0.225 | 0   | 10  | 24 | 140 | 2 | 0 | 1 |
| Q5V7F4_HALMA | 1 | Cell surface glycoprotein | csgl | pNG5138 | 887 | 51.9 | 99 | 2366 | 0.9997 | R | DNNDYELIEIDGSNTVSVGDGDTFSEEDVVLSSQGSK | G | 3 | 3904.7134 | 3906.7282 | 2.0147  | -2.0067 | 2.06  | 4.357 | 0.224 | 0.2 | 14  | 26 | 140 | 2 | 0 | 1 |
| Q5V7F4_HALMA | 1 | Cell surface glycoprotein | csgl | pNG5138 | 887 | 51.9 | 99 | 2366 | 0.9994 | R | DNNDYELIEIDGSNTVSVGDGDTFSEEDVVLSSQGSK | G | 3 | 3904.7134 | 3905.7082 | 0.9947  | -1.0034 | -2.20 | 4.373 | 0.193 | 0.1 | 8   | 27 | 140 | 2 | 0 | 1 |
| Q5V7F4_HALMA | 1 | Cell surface glycoprotein | csgl | pNG5138 | 887 | 51.9 | 99 | 2366 | 0.9992 | R | DNNDYELIEIDGSNTVSVGDGDTFSEEDVVLSSQGSK | G | 3 | 3904.7134 | 3906.7282 | 2.0147  | -2.0067 | 2.06  | 3.166 | 0.228 | 0.1 | 2   | 27 | 140 | 2 | 0 | 1 |
| Q5V7F4_HALMA | 1 | Cell surface glycoprotein | csgl | pNG5138 | 887 | 51.9 | 99 | 2366 | 0.9992 | R | DNNDYELIEIDGSNTVSVGDGDTFSEEDVVLSSQGSK | G | 3 | 3904.7134 | 3906.7282 | 2.0147  | -2.0067 | 2.06  | 3.461 | 0.228 | 0.3 | 6   | 25 | 140 | 2 | 0 | 1 |
| Q5V7F4_HALMA | 1 | Cell surface glycoprotein | csgl | pNG5138 | 887 | 51.9 | 99 | 2366 | 0.9991 | R | DNNDYELIEIDGSNTVSVGDGDTFSEEDVVLSSQGSK | G | 3 | 3904.7134 | 3906.7282 | 2.0147  | -2.0067 | 2.06  | 3.869 | 0.21  | 0   | 11  | 26 | 140 | 2 | 0 | 1 |
| Q5V7F4_HALMA | 1 | Cell surface glycoprotein | csgl | pNG5138 | 887 | 51.9 | 99 | 2366 | 0.9948 | R | DNNDYELIEIDGSNTVSVGDGDTFSEEDVVLSSQGSK | G | 3 | 3904.7134 | 3906.7282 | 2.0147  | -2.0067 | 2.06  | 2.732 | 0.173 | 0.9 | 1   | 26 | 140 | 2 | 0 | 1 |
| Q5V7F4_HALMA | 1 | Cell surface glycoprotein | csgl | pNG5138 | 887 | 51.9 | 99 | 2366 | 0.9926 | R | DNNDYELIEIDGSNTVSVGDGDTFSEEDVVLSSQGSK | G | 3 | 3904.7134 | 3905.7382 | 1.0247  | -1.0034 | 5.48  | 3.014 | 0.151 | 1.8 | 2   | 25 | 140 | 2 | 0 | 1 |
| Q5V7F4_HALMA | 1 | Cell surface glycoprotein | csgl | pNG5138 | 887 | 51.9 | 99 | 2366 | 0.9822 | R | DNNDYELIEIDGSNTVSVGDGDTFSEEDVVLSSQGSK | G | 3 | 3904.7134 | 3906.7282 | 2.0147  | -2.0067 | 2.06  | 3.519 | 0.086 | 0.5 | 3   | 27 | 140 | 2 | 0 | 1 |
| Q5V7F4_HALMA | 1 | Cell surface glycoprotein | csgl | pNG5138 | 887 | 51.9 | 99 | 2366 | 0.9820 | R | DNNDYELIEIDGSNTVSVGDGDTFSEEDVVLSSQGSK | G | 3 | 3904.7134 | 3906.7282 | 2.0147  | -2.0067 | 2.06  | 3.839 | 0.046 | 0.2 | 1   | 29 | 140 | 2 | 0 | 1 |
| Q5V7F4_HALMA | 1 | Cell surface glycoprotein | csgl | pNG5138 | 887 | 51.9 | 99 | 2366 | 0.9809 | R | DNNDYELIEIDGSNTVSVGDGDTFSEEDVVLSSQGSK | G | 3 | 3904.7134 | 3906.7282 | 2.0147  | -2.0067 | 2.06  | 3.902 | 0.04  | 0.2 | 1   | 28 | 140 | 2 | 0 | 1 |
| Q5V7F4_HALMA | 1 | Cell surface glycoprotein | csgl | pNG5138 | 887 | 51.9 | 99 | 2366 | 0.9807 | R | DNNDYELIEIDGSNTVSVGDGDTFSEEDVVLSSQGSK | G | 3 | 3904.7134 | 3906.7282 | 2.0147  | -2.0067 | 2.06  | 3.34  | 0.116 | 0.4 | 10  | 25 | 140 | 2 | 0 | 1 |
| Q5V7F4_HALMA | 1 | Cell surface glycoprotein | csgl | pNG5138 | 887 | 51.9 | 99 | 2366 | 0.9712 | R | DNNDYELIEIDGSNTVSVGDGDTFSEEDVVLSSQGSK | G | 3 | 3904.7134 | 3906.7282 | 2.0147  | -2.0067 | 2.06  | 2.934 | 0.117 | 0.9 | 6   | 26 | 140 | 2 | 0 | 1 |
| Q5V7F4_HALMA | 1 | Cell surface glycoprotein | csgl | pNG5138 | 887 | 51.9 | 99 | 2366 | 0.9376 | R | DNNDYELIEIDGSNTVSVGDGDTFSEEDVVLSSQGSK | G | 3 | 3904.7134 | 3905.7382 | 1.0247  | -1.0034 | 5.48  | 3.418 | 0.122 | 0.2 | 347 | 20 | 140 | 2 | 0 | 1 |
| Q5V7F4_HALMA | 1 | Cell surface glycoprotein | csgl | pNG5138 | 887 | 51.9 | 99 | 2366 | 0.9365 | R | DNNDYELIEIDGSNTVSVGDGDTFSEEDVVLSSQGSK | G | 3 | 3904.7134 | 3906.6982 | 1.9847  | -2.0067 | -5.62 | 3.073 | 0.146 | 0.6 | 403 | 19 | 140 | 2 | 0 | 1 |
| Q5V7F4_HALMA | 1 | Cell surface glycoprotein | csgl | pNG5138 | 887 | 51.9 | 99 | 2366 | 0.9252 | R | DNNDYELIEIDGSNTVSVGDGDTFSEEDVVLSSQGSK | G | 3 | 3904.7134 | 3906.7282 | 2.0147  | -2.0067 | 2.06  | 3.178 | 0.04  | 0.5 | 3   | 24 | 140 | 2 | 0 | 1 |
| Q5V7F4_HALMA | 1 | Cell surface glycoprotein | csgl | pNG5138 | 887 | 51.9 | 99 | 2366 | 1      | K | DNVIVAFVDSR                           | G | 2 | 1233.6353 | 1233.6356 | 0.0003  | 0       | 0.22  | 3.147 | 0.409 | 0   | 1   | 18 | 20  | 2 | 0 | 1 |
| Q5V7F4_HALMA | 1 | Cell surface glycoprotein | csgl | pNG5138 | 887 | 51.9 | 99 | 2366 | 1      | K | DNVIVAFVDSR                           | G | 2 | 1233.6353 | 1233.6367 | 0.0014  | 0       | 1.11  | 3.449 | 0.493 | 0   | 1   | 17 | 20  | 2 | 0 | 1 |
| Q5V7F4_HALMA | 1 | Cell surface glycoprotein | csgl | pNG5138 | 887 | 51.9 | 99 | 2366 | 1      | K | DNVIVAFVDSR                           | G | 2 | 1233.6353 | 1233.6364 | 0.0011  | 0       | 0.91  | 3.413 | 0.469 | 0   | 1   | 17 | 20  | 2 | 0 | 1 |
| Q5V7F4_HALMA | 1 | Cell surface glycoprotein | csgl | pNG5138 | 887 | 51.9 | 99 | 2366 | 1      | K | DNVIVAFVDSR                           | G | 2 | 1233.6353 | 1233.6454 | 0.0101  | 0       | 8.21  | 2.41  | 0.378 | 0   | 1   | 16 | 20  | 2 | 0 | 1 |
| Q5V7F4_HALMA | 1 | Cell surface glycoprotein | csgl | pNG5138 | 887 | 51.9 | 99 | 2366 | 1      | K | DNVIVAFVDSR                           | G | 2 | 1233.6353 | 1234.6454 | 1.0101  | -1.0034 | 5.49  | 3.162 | 0.442 | 0   | 1   | 17 | 20  | 2 | 0 | 1 |
| Q5V7F4_HALMA | 1 | Cell surface glycoprotein | csgl | pNG5138 | 887 | 51.9 | 99 | 2366 | 1      | K | DNVIVAFVDSR                           | G | 2 | 1233.6353 | 1233.6389 | 0.0036  | 0       | 2.89  | 3.65  | 0.471 | 0   | 1   | 18 | 20  | 2 | 0 | 1 |
| Q5V7F4_HALMA | 1 | Cell surface glycoprotein | csgl | pNG5138 | 887 | 51.9 | 99 | 2366 | 1      | K | DNVIVAFVDSR                           | G | 2 | 1233.6353 | 1233.6454 | 0.0101  | 0       | 8.21  | 2.79  | 0.411 | 0   | 1   | 1  |     |   |   |   |

































|              |   |                           |      |         |     |      |    |      |   |   |                                   |   |   |           |           |         |         |       |       |       |   |   |    |     |   |   |   |
|--------------|---|---------------------------|------|---------|-----|------|----|------|---|---|-----------------------------------|---|---|-----------|-----------|---------|---------|-------|-------|-------|---|---|----|-----|---|---|---|
| Q5V7F4_HALMA | 1 | Cell surface glycoprotein | csgl | pNG5138 | 887 | 51.9 | 99 | 2366 | 1 | R | VTSVEVQNGGSGDVTGGSTLQTSSSGPDPAFVR | A | 2 | 3038.4428 | 3038.4630 | 0.0202  | 0       | 6.64  | 5.246 | 0.643 | 0 | 1 | 27 | 60  | 2 | 0 | 1 |
| Q5V7F4_HALMA | 1 | Cell surface glycoprotein | csgl | pNG5138 | 887 | 51.9 | 99 | 2366 | 1 | R | VTSVEVQNGGSGDVTGGSTLQTSSSGPDPAFVR | A | 2 | 3038.4428 | 3039.4395 | 0.9967  | -1.0034 | -2.18 | 3.616 | 0.398 | 0 | 1 | 19 | 60  | 2 | 0 | 1 |
| Q5V7F4_HALMA | 1 | Cell surface glycoprotein | csgl | pNG5138 | 887 | 51.9 | 99 | 2366 | 1 | R | VTSVEVQNGGSGDVTGGSTLQTSSSGPDPAFVR | A | 2 | 3038.4428 | 3039.4454 | 1.0026  | -1.0034 | -0.24 | 5.484 | 0.638 | 0 | 1 | 27 | 60  | 2 | 0 | 1 |
| Q5V7F4_HALMA | 1 | Cell surface glycoprotein | csgl | pNG5138 | 887 | 51.9 | 99 | 2366 | 1 | R | VTSVEVQNGGSGDVTGGSTLQTSSSGPDPAFVR | A | 3 | 3038.4428 | 3038.4583 | 0.0155  | 0       | 5.10  | 3.755 | 0.341 | 0 | 1 | 37 | 120 | 2 | 0 | 1 |
| Q5V7F4_HALMA | 1 | Cell surface glycoprotein | csgl | pNG5138 | 887 | 51.9 | 99 | 2366 | 1 | R | VTSVEVQNGGSGDVTGGSTLQTSSSGPDPAFVR | A | 3 | 3038.4428 | 3040.4482 | 2.0053  | -2.0067 | -0.45 | 5.104 | 0.526 | 0 | 1 | 41 | 120 | 2 | 0 | 1 |
| Q5V7F4_HALMA | 1 | Cell surface glycoprotein | csgl | pNG5138 | 887 | 51.9 | 99 | 2366 | 1 | R | VTSVEVQNGGSGDVTGGSTLQTSSSGPDPAFVR | A | 2 | 3038.4428 | 3038.4469 | 0.0040  | 0       | 1.33  | 5.287 | 0.44  | 0 | 1 | 25 | 60  | 2 | 0 | 1 |
| Q5V7F4_HALMA | 1 | Cell surface glycoprotein | csgl | pNG5138 | 887 | 51.9 | 99 | 2366 | 1 | R | VTSVEVQNGGSGDVTGGSTLQTSSSGPDPAFVR | A | 3 | 3038.4428 | 3038.4464 | 0.0036  | 0       | 1.19  | 5.895 | 0.49  | 0 | 1 | 37 | 120 | 2 | 0 | 1 |
| Q5V7F4_HALMA | 1 | Cell surface glycoprotein | csgl | pNG5138 | 887 | 51.9 | 99 | 2366 | 1 | R | VTSVEVQNGGSGDVTGGSTLQTSSSGPDPAFVR | A | 3 | 3038.4428 | 3038.4428 | -0.0001 | 0       | -0.02 | 3.822 | 0.326 | 0 | 1 | 27 | 120 | 2 | 0 | 1 |
| Q5V7F4_HALMA | 1 | Cell surface glycoprotein | csgl | pNG5138 | 887 | 51.9 | 99 | 2366 | 1 | R | VTSVEVQNGGSGDVTGGSTLQTSSSGPDPAFVR | A | 2 | 3038.4428 | 3039.4530 | 1.0102  | -1.0034 | 2.24  | 4.989 | 0.585 | 0 | 1 | 23 | 60  | 2 | 0 | 1 |
| Q5V7F4_HALMA | 1 | Cell surface glycoprotein | csgl | pNG5138 | 887 | 51.9 | 99 | 2366 | 1 | R | VTSVEVQNGGSGDVTGGSTLQTSSSGPDPAFVR | A | 2 | 3038.4428 | 3038.4527 | 0.0099  | 0       | 3.26  | 5.064 | 0.633 | 0 | 1 | 27 | 60  | 2 | 0 | 1 |
| Q5V7F4_HALMA | 1 | Cell surface glycoprotein | csgl | pNG5138 | 887 | 51.9 | 99 | 2366 | 1 | R | VTSVEVQNGGSGDVTGGSTLQTSSSGPDPAFVR | A | 3 | 3038.4428 | 3038.4512 | 0.0084  | 0       | 2.75  | 4.434 | 0.317 | 0 | 1 | 31 | 120 | 2 | 0 | 1 |
| Q5V7F4_HALMA | 1 | Cell surface glycoprotein | csgl | pNG5138 | 887 | 51.9 | 99 | 2366 | 1 | R | VTSVEVQNGGSGDVTGGSTLQTSSSGPDPAFVR | A | 4 | 3038.4428 | 3039.4509 | 1.0081  | -1.0034 | 1.55  | 3.658 | 0.427 | 0 | 1 | 41 | 180 | 2 | 0 | 1 |
| Q5V7F4_HALMA | 1 | Cell surface glycoprotein | csgl | pNG5138 | 887 | 51.9 | 99 | 2366 | 1 | R | VTSVEVQNGGSGDVTGGSTLQTSSSGPDPAFVR | A | 3 | 3038.4428 | 3038.4466 | 0.0038  | 0       | 1.25  | 4.453 | 0.43  | 0 | 1 | 34 | 120 | 2 | 0 | 1 |
| Q5V7F4_HALMA | 1 | Cell surface glycoprotein | csgl | pNG5138 | 887 | 51.9 | 99 | 2366 | 1 | R | VTSVEVQNGGSGDVTGGSTLQTSSSGPDPAFVR | A | 3 | 3038.4428 | 3038.4475 | 0.0047  | 0       | 1.55  | 3.787 | 0.343 | 0 | 1 | 33 | 120 | 2 | 0 | 1 |
| Q5V7F4_HALMA | 1 | Cell surface glycoprotein | csgl | pNG5138 | 887 | 51.9 | 99 | 2366 | 1 | R | VTSVEVQNGGSGDVTGGSTLQTSSSGPDPAFVR | A | 2 | 3038.4428 | 3040.4454 | 2.0026  | -2.0067 | -1.34 | 5.424 | 0.563 | 0 | 1 | 26 | 60  | 2 | 0 | 1 |
| Q5V7F4_HALMA | 1 | Cell surface glycoprotein | csgl | pNG5138 | 887 | 51.9 | 99 | 2366 | 1 | R | VTSVEVQNGGSGDVTGGSTLQTSSSGPDPAFVR | A | 3 | 3038.4428 | 3039.4583 | 1.0155  | -1.0034 | 3.98  | 4.845 | 0.515 | 0 | 1 | 32 | 120 | 2 | 0 | 1 |
| Q5V7F4_HALMA | 1 | Cell surface glycoprotein | csgl | pNG5138 | 887 | 51.9 | 99 | 2366 | 1 | R | VTSVEVQNGGSG                      |   |   |           |           |         |         |       |       |       |   |   |    |     |   |   |   |





|  |              |   |                      |           |           |     |      |    |      |        |   |                    |   |   |           |           |         |         |       |       |       |     |   |      |    |   |   |   |  |
|--|--------------|---|----------------------|-----------|-----------|-----|------|----|------|--------|---|--------------------|---|---|-----------|-----------|---------|---------|-------|-------|-------|-----|---|------|----|---|---|---|--|
|  | B0_          | 1 | Hypothetical protein | rmaCI1803 | rmACI1803 | 396 | 86.6 | 65 | 1393 | 0.9985 | K | ELDEPTDEWGVRVSEVVR | E | 3 | 2243.0706 | 2243.0775 | 0.0069  | 0       | 3.05  | 2.773 | 0.214 | 0.3 | 1 | 23   | 72 | 2 | 1 | 1 |  |
|  | QSV1B0_HALMA | 1 | Hypothetical protein | rmaCI1803 | rmACI1803 | 396 | 86.6 | 65 | 1393 | 0.9982 | K | ELDEPTDEWGVRVSEVVR | E | 3 | 2243.0706 | 2243.0680 | -0.0027 | 0       | -1.19 | 2.426 | 0.265 | 0.1 | 4 | 23   | 72 | 2 | 1 | 1 |  |
|  | QSV1B0_HALMA | 1 | Hypothetical protein | rmaCI1803 | rmACI1803 | 396 | 86.6 | 65 | 1393 | 0.9975 | K | ELDEPTDEWGVRVSEVVR | E | 3 | 2243.0706 | 2245.0882 | 2.0175  | -2.0067 | 4.84  | 2.736 | 0.255 | 0.6 | 2 | 25   | 72 | 2 | 1 | 1 |  |
|  | QSV1B0_HALMA | 1 | Hypothetical protein | rmaCI1803 | rmACI1803 | 396 | 86.6 | 65 | 1393 | 0.9968 | K | ELDEPTDEWGVRVSEVVR | E | 3 | 2243.0706 | 2243.0745 | 0.0039  | 0       | 1.75  | 2.509 | 0.222 | 0.2 | 2 | 25   | 72 | 2 | 1 | 1 |  |
|  | QSV1B0_HALMA | 1 | Hypothetical protein | rmaCI1803 | rmACI1803 | 396 | 86.6 | 65 | 1393 | 0.9967 | K | ELDEPTDEWGVRVSEVVR | E | 3 | 2243.0706 | 2243.0714 | 0.0008  | 0       | 0.36  | 2.376 | 0.234 | 0.2 | 2 | 27   | 72 | 2 | 1 | 1 |  |
|  | QSV1B0_HALMA | 1 | Hypothetical protein | rmaCI1803 | rmACI1803 | 396 | 86.6 | 65 | 1393 | 0.9962 | K | ELDEPTDEWGVRVSEVVR | E | 3 | 2243.0706 | 2243.0747 | 0.0041  | 0       | 1.83  | 2.064 | 0.248 | 0.2 | 1 | 29   | 72 | 2 | 1 | 1 |  |
|  | QSV1B0_HALMA | 1 | Hypothetical protein | rmaCI1803 | rmACI1803 | 396 | 86.6 | 65 | 1393 | 0.9961 | K | ELDEPTDEWGVRVSEVVR | E | 2 | 2243.0706 | 2243.0790 | 0.0083  | 0       | 3.71  | 2.745 | 0.259 | 0.2 | 6 | 16   | 36 | 2 | 1 | 1 |  |
|  | QSV1B0_HALMA | 1 | Hypothetical protein | rmaCI1803 | rmACI1803 | 396 | 86.6 | 65 | 1393 | 0.9960 | K | ELDEPTDEWGVRVSEVVR | E | 3 | 2243.0706 | 2245.0582 | 1.9875  | -2.0067 | -8.54 | 2.684 | 0.249 | 0.6 | 3 | 24   | 72 | 2 | 1 | 1 |  |
|  | QSV1B0_HALMA | 1 | Hypothetical protein | rmaCI1803 | rmACI1803 | 396 | 86.6 | 65 | 1393 | 0.9953 | K | ELDEPTDEWGVRVSEVVR | E | 3 | 2243.0706 | 2245.0882 | 2.0175  | -2.0067 | 4.84  | 2.532 | 0.237 | 0.4 | 1 | 25   | 72 | 2 | 1 | 1 |  |
|  | QSV1B0_HALMA | 1 | Hypothetical protein | rmaCI1803 | rmACI1803 | 396 | 86.6 | 65 | 1393 | 0.9951 | K | ELDEPTDEWGVRVSEVVR | E | 2 | 2243.0706 | 2243.0775 | 0.0069  | 0       | 3.06  | 2.599 | 0.262 | 0.1 | 5 | 16   | 36 | 2 | 1 | 1 |  |
|  | QSV1B0_HALMA | 1 | Hypothetical protein | rmaCI1803 | rmACI1803 | 396 | 86.6 | 65 | 1393 | 0.9948 | K | ELDEPTDEWGVRVSEVVR | E | 2 | 2243.0706 | 2243.0731 | 0.0025  | 0       | 1.10  | 2.547 | 0.253 | 0.2 | 3 | 16   | 36 | 2 | 1 | 1 |  |
|  | QSV1B0_HALMA | 1 | Hypothetical protein | rmaCI1803 | rmACI1803 | 396 | 86.6 | 65 | 1393 | 0.9947 | K | ELDEPTDEWGVRVSEVVR | E | 2 | 2243.0706 | 2243.0768 | 0.0061  | 0       | 2.73  | 2.643 | 0.265 | 0.2 | 8 | 15   | 36 | 2 | 1 | 1 |  |
|  | QSV1B0_HALMA | 1 | Hypothetical protein | rmaCI1803 | rmACI1803 | 396 | 86.6 | 65 | 1393 | 0.9942 | K | ELDEPTDEWGVRVSEVVR | E | 3 | 2243.0706 | 2245.1182 | 2.0475  | -2.0067 | 18.21 | 2.601 | 0.235 | 0.9 | 2 | 26   | 72 | 2 | 1 | 1 |  |
|  | QSV1B0_HALMA | 1 | Hypothetical protein | rmaCI1803 | rmACI1803 | 396 | 86.6 | 65 | 1393 | 0.9856 | K | ELDEPTDEWGVRVSEVVR | E | 3 | 2243.0706 | 2243.0716 | 0.0010  | 0       | 0.44  | 2.186 | 0.193 | 0.6 | 2 | 24   | 72 | 2 | 1 | 1 |  |
|  | QSV1B0_HALMA | 1 | Hypothetical protein | rmaCI1803 | rmACI1803 | 396 | 86.6 | 65 | 1393 | 0.9823 | K | ELDEPTDEWGVRVSEVVR | E | 3 | 2243.0706 | 2243.0720 | 0.0014  | 0       | 0.61  | 2.811 | 0.138 | 0.1 | 4 | 28   | 72 | 2 | 1 | 1 |  |
|  | QSV1B0_HALMA | 1 | Hypothetical protein | rmaCI1803 | rmACI1803 | 396 | 86.6 | 65 | 1393 | 0.9804 | K | ELDEPTDEWGVRVSEVVR | E | 3 | 2243.0706 | 2243.0707 | 0.0001  | 0       | 0.03  | 2.455 | 0.14  | 0.5 | 1 | 27</ |    |   |   |   |  |

|              |   |                      |          |          |     |      |    |      |        |   |               |   |   |           |           |         |         |        |       |       |     |   |    |    |   |   |   |
|--------------|---|----------------------|----------|----------|-----|------|----|------|--------|---|---------------|---|---|-----------|-----------|---------|---------|--------|-------|-------|-----|---|----|----|---|---|---|
| QSV1B0_HALMA | 1 | Hypothetical protein | rmAC1803 | rmAC1803 | 396 | 86.6 | 65 | 1393 | 1      | K | FILPQELTSLVGR | Y | 3 | 1471.8398 | 1471.8382 | -0.0017 | 0       | -1.12  | 3.733 | 0.365 | 0   | 1 | 28 | 48 | 2 | 0 | 1 |
| QSV1B0_HALMA | 1 | Hypothetical protein | rmAC1803 | rmAC1803 | 396 | 86.6 | 65 | 1393 | 1      | K | FILPQELTSLVGR | Y | 2 | 1471.8398 | 1471.8486 | 0.0088  | 0       | 5.97   | 3.916 | 0.482 | 0   | 1 | 20 | 24 | 2 | 0 | 1 |
| QSV1B0_HALMA | 1 | Hypothetical protein | rmAC1803 | rmAC1803 | 396 | 86.6 | 65 | 1393 | 1      | K | FILPQELTSLVGR | Y | 2 | 1471.8398 | 1471.8437 | 0.0039  | 0       | 2.65   | 3.193 | 0.469 | 0   | 1 | 21 | 24 | 2 | 0 | 1 |
| QSV1B0_HALMA | 1 | Hypothetical protein | rmAC1803 | rmAC1803 | 396 | 86.6 | 65 | 1393 | 1      | K | FILPQELTSLVGR | Y | 2 | 1471.8398 | 1471.8448 | 0.0050  | 0       | 3.40   | 3.074 | 0.385 | 0   | 1 | 18 | 24 | 2 | 0 | 1 |
| QSV1B0_HALMA | 1 | Hypothetical protein | rmAC1803 | rmAC1803 | 396 | 86.6 | 65 | 1393 | 1      | K | FILPQELTSLVGR | Y | 2 | 1471.8398 | 1471.8412 | 0.0013  | 0       | 0.91   | 3.143 | 0.39  | 0   | 1 | 18 | 24 | 2 | 0 | 1 |
| QSV1B0_HALMA | 1 | Hypothetical protein | rmAC1803 | rmAC1803 | 396 | 86.6 | 65 | 1393 | 1      | K | FILPQELTSLVGR | Y | 2 | 1471.8398 | 1471.8397 | -0.0001 | 0       | -0.09  | 2.822 | 0.321 | 0   | 1 | 17 | 24 | 2 | 0 | 1 |
| QSV1B0_HALMA | 1 | Hypothetical protein | rmAC1803 | rmAC1803 | 396 | 86.6 | 65 | 1393 | 1      | K | FILPQELTSLVGR | Y | 2 | 1471.8398 | 1471.8413 | 0.0015  | 0       | 0.99   | 3.831 | 0.481 | 0   | 1 | 21 | 24 | 2 | 0 | 1 |
| QSV1B0_HALMA | 1 | Hypothetical protein | rmAC1803 | rmAC1803 | 396 | 86.6 | 65 | 1393 | 1      | K | FILPQELTSLVGR | Y | 2 | 1471.8398 | 1471.8467 | 0.0068  | 0       | 4.64   | 3.734 | 0.482 | 0   | 1 | 21 | 24 | 2 | 0 | 1 |
| QSV1B0_HALMA | 1 | Hypothetical protein | rmAC1803 | rmAC1803 | 396 | 86.6 | 65 | 1393 | 1      | K | FILPQELTSLVGR | Y | 2 | 1471.8398 | 1471.8468 | 0.0070  | 0       | 4.72   | 2.946 | 0.42  | 0   | 1 | 18 | 24 | 2 | 0 | 1 |
| QSV1B0_HALMA | 1 | Hypothetical protein | rmAC1803 | rmAC1803 | 396 | 86.6 | 65 | 1393 | 1      | K | FILPQELTSLVGR | Y | 3 | 1471.8398 | 1471.8390 | -0.0008 | 0       | -0.57  | 3.87  | 0.325 | 0   | 1 | 28 | 48 | 2 | 0 | 1 |
| QSV1B0_HALMA | 1 | Hypothetical protein | rmAC1803 | rmAC1803 | 396 | 86.6 | 65 | 1393 | 1      | K | FILPQELTSLVGR | Y | 2 | 1471.8398 | 1471.8413 | 0.0015  | 0       | 0.99   | 4.238 | 0.283 | 0.1 | 1 | 21 | 24 | 2 | 0 | 1 |
| QSV1B0_HALMA | 1 | Hypothetical protein | rmAC1803 | rmAC1803 | 396 | 86.6 | 65 | 1393 | 1      | K | FILPQELTSLVGR | Y | 2 | 1471.8398 | 1471.8451 | 0.0052  | 0       | 3.56   | 4.616 | 0.494 | 0   | 1 | 21 | 24 | 2 | 0 | 1 |
| QSV1B0_HALMA | 1 | Hypothetical protein | rmAC1803 | rmAC1803 | 396 | 86.6 | 65 | 1393 | 0.9999 | K | FILPQELTSLVGR | Y | 2 | 1471.8398 | 1471.8420 | 0.0022  | 0       | 1.49   | 2.677 | 0.316 | 0   | 1 | 16 | 24 | 2 | 0 | 1 |
| QSV1B0_HALMA | 1 | Hypothetical protein | rmAC1803 | rmAC1803 | 396 | 86.6 | 65 | 1393 | 0.9999 | K | FILPQELTSLVGR | Y | 2 | 1471.8398 | 1472.7069 | 0.8671  | -1.0034 | -92.60 | 3.185 | 0.316 | 0   | 1 | 19 | 24 | 2 | 0 | 1 |
| QSV1B0_HALMA | 1 | Hypothetical protein | rmAC1803 | rmAC1803 | 396 | 86.6 | 65 | 1393 | 0.9999 | K | FILPQELTSLVGR | Y | 2 | 1471.8398 | 1471.8471 | 0.0073  | 0       | 4.97   | 2.815 | 0.263 | 0   | 1 | 18 | 24 | 2 | 0 | 1 |
| QSV1B0_HALMA | 1 | Hypothetical protein | rmAC1803 | rmAC1803 | 396 | 86.6 | 65 | 1393 | 0.9999 | K | FILPQELTSLVGR | Y | 2 | 1471.8398 | 1471.8416 | 0.0018  | 0       | 1.24   | 2.54  | 0.322 | 0.1 | 1 | 17 | 24 | 2 | 0 | 1 |
| QSV1B0_HALMA | 1 | Hypothetical protein | rmAC1803 | rmAC1803 | 396 | 86.6 | 65 | 1393 | 0.9999 | K | FILPQELTSLVGR | Y | 2 | 1471.8398 | 1471.8426 | 0.0028  | 0       | 1.90   | 2.412 | 0.31  | 0.1 | 1 | 16 | 24 |   |   |   |

|              |   |                      |          |     |      |    |      |        |   |                          |   |   |           |           |         |         |       |       |       |     |    |    |     |   |   |   |
|--------------|---|----------------------|----------|-----|------|----|------|--------|---|--------------------------|---|---|-----------|-----------|---------|---------|-------|-------|-------|-----|----|----|-----|---|---|---|
| QSV1B0_HALMA | 1 | Hypothetical protein | rmAC1803 | 396 | 86.6 | 65 | 1393 | 0.9999 | R | GVLDQGIHFYPFVSDVTRFDMR   | T | 4 | 2711.3530 | 2711.3598 | 0.0068  | 0       | 2.50  | 2.666 | 0.225 | 0.1 | 1  | 38 | 132 | 2 | 1 | 1 |
| QSV1B0_HALMA | 1 | Hypothetical protein | rmAC1803 | 396 | 86.6 | 65 | 1393 | 0.9998 | R | GVLDQGIHFYPFVSDVTRFDMR   | T | 4 | 2711.3530 | 2711.3571 | 0.0041  | 0       | 1.51  | 2.643 | 0.263 | 0.1 | 5  | 35 | 132 | 2 | 1 | 1 |
| QSV1B0_HALMA | 1 | Hypothetical protein | rmAC1803 | 396 | 86.6 | 65 | 1393 | 0.9998 | R | GVLDQGIHFYPFVSDVTRFDMR   | T | 4 | 2711.3530 | 2711.3557 | 0.0026  | 0       | 0.97  | 2.949 | 0.322 | 0.4 | 33 | 32 | 132 | 2 | 1 | 1 |
| QSV1B0_HALMA | 1 | Hypothetical protein | rmAC1803 | 396 | 86.6 | 65 | 1393 | 0.9988 | R | GVLDQGIHFYPFVSDVTRFDMR   | T | 4 | 2727.3530 | 2727.3525 | -0.0005 | 0       | -0.20 | 2.691 | 0.121 | 0.1 | 1  | 39 | 132 | 2 | 1 | 1 |
| QSV1B0_HALMA | 1 | Hypothetical protein | rmAC1803 | 396 | 86.6 | 65 | 1393 | 0.9969 | R | GVLDQGIHFYPFVSDVTRFDMR   | T | 3 | 2711.3530 | 2711.3482 | -0.0049 | 0       | -1.79 | 2.635 | 0.209 | 0.2 | 1  | 27 | 88  | 2 | 1 | 1 |
| QSV1B0_HALMA | 1 | Hypothetical protein | rmAC1803 | 396 | 86.6 | 65 | 1393 | 0.9953 | R | GVLDQGIHFYPFVSDVTRFDMR   | T | 4 | 2727.3530 | 2727.3515 | -0.0015 | 0       | -0.56 | 2.88  | 0.09  | 0.1 | 2  | 38 | 132 | 2 | 1 | 1 |
| QSV1B0_HALMA | 1 | Hypothetical protein | rmAC1803 | 396 | 86.6 | 65 | 1393 | 0.9896 | R | GVLDQGIHFYPFVSDVTRFDMR   | T | 4 | 2727.3530 | 2727.3505 | -0.0025 | 0       | -0.91 | 2.707 | 0.032 | 0.2 | 1  | 38 | 132 | 2 | 1 | 1 |
| QSV1B0_HALMA | 1 | Hypothetical protein | rmAC1803 | 396 | 86.6 | 65 | 1393 | 1      | K | HLQGSVDKENGHSLEALDFDDETR | E | 4 | 2711.2423 | 2712.2282 | 0.9859  | -1.0034 | -6.44 | 4.95  | 0.334 | 0   | 1  | 47 | 138 | 2 | 1 | 1 |
| QSV1B0_HALMA | 1 | Hypothetical protein | rmAC1803 | 396 | 86.6 | 65 | 1393 | 1      | K | HLQGSVDKENGHSLEALDFDDETR | E | 3 | 2711.2423 | 2712.2290 | 0.9867  | -1.0034 | -6.14 | 4.986 | 0.443 | 0   | 1  | 31 | 92  | 2 | 1 | 1 |
| QSV1B0_HALMA | 1 | Hypothetical protein | rmAC1803 | 396 | 86.6 | 65 | 1393 | 1      | K | HLQGSVDKENGHSLEALDFDDETR | E | 3 | 2711.2423 | 2712.2287 | 0.9863  | -1.0034 | -6.28 | 4.762 | 0.404 | 0   | 1  | 34 | 92  | 2 | 1 | 1 |
| QSV1B0_HALMA | 1 | Hypothetical protein | rmAC1803 | 396 | 86.6 | 65 | 1393 | 1      | K | HLQGSVDKENGHSLEALDFDDETR | E | 3 | 2711.2423 | 2712.2299 | 0.9876  | -1.0034 | -5.80 | 4.733 | 0.43  | 0   | 1  | 31 | 92  | 2 | 1 | 1 |
| QSV1B0_HALMA | 1 | Hypothetical protein | rmAC1803 | 396 | 86.6 | 65 | 1393 | 1      | K | HLQGSVDKENGHSLEALDFDDETR | E | 4 | 2711.2423 | 2711.2477 | 0.0054  | 0       | 2.00  | 4.782 | 0.495 | 0   | 1  | 42 | 138 | 2 | 1 | 1 |
| QSV1B0_HALMA | 1 | Hypothetical protein | rmAC1803 | 396 | 86.6 | 65 | 1393 | 1      | K | HLQGSVDKENGHSLEALDFDDETR | E | 3 | 2711.2423 | 2712.2274 | 0.9851  | -1.0034 | -6.75 | 5.056 | 0.405 | 0   | 1  | 36 | 92  | 2 | 1 | 1 |
| QSV1B0_HALMA | 1 | Hypothetical protein | rmAC1803 | 396 | 86.6 | 65 | 1393 | 1      | K | HLQGSVDKENGHSLEALDFDDETR | E | 4 | 2711.2423 | 2713.2509 | 2.0086  | -2.0067 | 0.69  | 3.879 | 0.304 | 0   | 1  | 50 | 138 | 2 | 1 | 1 |
| QSV1B0_HALMA | 1 | Hypothetical protein | rmAC1803 | 396 | 86.6 | 65 | 1393 | 1      | K | HLQGSVDKENGHSLEALDFDDETR | E | 4 | 2711.2423 | 2712.2304 | 0.9881  | -1.0034 | -5.63 | 4.708 | 0.385 | 0   | 1  | 48 | 138 | 2 | 1 | 1 |
| QSV1B0_HALMA | 1 | Hypothetical protein | rmAC1803 | 396 | 86.6 | 65 | 1393 | 1      | K | HLQGSVDKENGHSLEALDFDDETR | E | 4 | 2711.2423 | 2711.2477 | 0.0054  | 0       | 2.00  | 4.713 | 0.464 | 0   | 1  | 43 | 138 | 2 | 1 | 1 |
| QSV1B0_HALMA | 1 | Hypothetical protein | rmAC1803 | 396 | 86.6 | 65 | 1393 | 0.9999 | K | HLQGSVDKENGHSLEALDFDDETR | E | 4 | 2711.2423 | 2713.2509 | 2.0086  | -2.0067 | 0.69  | 3.821 | 0.276 | 0   | 1  | 37 | 138 | 2 | 1 | 1 |
| QSV1B0_HALMA | 1 | Hyp                  |          |     |      |    |      |        |   |                          |   |   |           |           |         |         |       |       |       |     |    |    |     |   |   |   |









|              |   |                      |          |     |      |    |      |        |   |                          |   |   |           |           |         |   |       |       |       |     |    |    |    |   |   |   |
|--------------|---|----------------------|----------|-----|------|----|------|--------|---|--------------------------|---|---|-----------|-----------|---------|---|-------|-------|-------|-----|----|----|----|---|---|---|
| QSV1B0_HALMA | 1 | Hypothetical protein | rmAC1803 | 396 | 86.6 | 65 | 1393 | 1      | K | ILGQIDEEAEVDVEAMEEEAQKIK | Q | 3 | 2715.3160 | 2715.3195 | 0.0035  | 0 | 1.27  | 4.372 | 0.329 | 0   | 1  | 30 | 92 | 2 | 1 | 1 |
| QSV1B0_HALMA | 1 | Hypothetical protein | rmAC1803 | 396 | 86.6 | 65 | 1393 | 1      | K | ILGQIDEEAEVDVEAMEEEAQKIK | Q | 3 | 2715.3160 | 2715.3237 | 0.0077  | 0 | 2.82  | 3.977 | 0.347 | 0   | 2  | 26 | 92 | 2 | 1 | 1 |
| QSV1B0_HALMA | 1 | Hypothetical protein | rmAC1803 | 396 | 86.6 | 65 | 1393 | 1      | K | ILGQIDEEAEVDVEAMEEEAQKIK | Q | 3 | 2715.3160 | 2715.3233 | 0.0073  | 0 | 2.69  | 4.801 | 0.337 | 0   | 1  | 32 | 92 | 2 | 1 | 1 |
| QSV1B0_HALMA | 1 | Hypothetical protein | rmAC1803 | 396 | 86.6 | 65 | 1393 | 1      | K | ILGQIDEEAEVDVEAMEEEAQKIK | Q | 3 | 2715.3160 | 2715.3208 | 0.0047  | 0 | 1.74  | 4.597 | 0.424 | 0   | 1  | 33 | 92 | 2 | 1 | 1 |
| QSV1B0_HALMA | 1 | Hypothetical protein | rmAC1803 | 396 | 86.6 | 65 | 1393 | 1      | K | ILGQIDEEAEVDVEAMEEEAQKIK | Q | 3 | 2715.3160 | 2715.3215 | 0.0055  | 0 | 2.01  | 5.18  | 0.325 | 0   | 1  | 34 | 92 | 2 | 1 | 1 |
| QSV1B0_HALMA | 1 | Hypothetical protein | rmAC1803 | 396 | 86.6 | 65 | 1393 | 1      | K | ILGQIDEEAEVDVEAMEEEAQKIK | Q | 3 | 2715.3160 | 2715.3123 | -0.0037 | 0 | -1.36 | 5.019 | 0.397 | 0   | 1  | 33 | 92 | 2 | 1 | 1 |
| QSV1B0_HALMA | 1 | Hypothetical protein | rmAC1803 | 396 | 86.6 | 65 | 1393 | 1      | K | ILGQIDEEAEVDVEAMEEEAQKIK | Q | 3 | 2715.3160 | 2715.3193 | 0.0033  | 0 | 1.21  | 4.393 | 0.384 | 0   | 1  | 34 | 92 | 2 | 1 | 1 |
| QSV1B0_HALMA | 1 | Hypothetical protein | rmAC1803 | 396 | 86.6 | 65 | 1393 | 1      | K | ILGQIDEEAEVDVEAMEEEAQKIK | Q | 3 | 2715.3160 | 2715.3250 | 0.0089  | 0 | 3.30  | 4.427 | 0.425 | 0   | 1  | 32 | 92 | 2 | 1 | 1 |
| QSV1B0_HALMA | 1 | Hypothetical protein | rmAC1803 | 396 | 86.6 | 65 | 1393 | 1      | K | ILGQIDEEAEVDVEAMEEEAQKIK | Q | 3 | 2715.3160 | 2715.3220 | 0.0060  | 0 | 2.22  | 5.292 | 0.42  | 0   | 1  | 35 | 92 | 2 | 1 | 1 |
| QSV1B0_HALMA | 1 | Hypothetical protein | rmAC1803 | 396 | 86.6 | 65 | 1393 | 0.9999 | K | ILGQIDEEAEVDVEAMEEEAQKIK | Q | 3 | 2715.3160 | 2715.3222 | 0.0062  | 0 | 2.28  | 4.021 | 0.263 | 0   | 1  | 30 | 92 | 2 | 1 | 1 |
| QSV1B0_HALMA | 1 | Hypothetical protein | rmAC1803 | 396 | 86.6 | 65 | 1393 | 0.9999 | K | ILGQIDEEAEVDVEAMEEEAQKIK | Q | 3 | 2715.3160 | 2715.3288 | 0.0128  | 0 | 4.71  | 4.035 | 0.312 | 0.1 | 17 | 22 | 92 | 2 | 1 | 1 |
| QSV1B0_HALMA | 1 | Hypothetical protein | rmAC1803 | 396 | 86.6 | 65 | 1393 | 0.9999 | K | ILGQIDEEAEVDVEAMEEEAQKIK | Q | 3 | 2731.3160 | 2731.3128 | -0.0032 | 0 | -1.17 | 3.538 | 0.29  | 0.1 | 1  | 28 | 92 | 2 | 1 | 1 |
| QSV1B0_HALMA | 1 | Hypothetical protein | rmAC1803 | 396 | 86.6 | 65 | 1393 | 0.9999 | K | ILGQIDEEAEVDVEAMEEEAQKIK | Q | 3 | 2715.3160 | 2715.3169 | 0.0009  | 0 | 0.33  | 3.471 | 0.286 | 0   | 1  | 30 | 92 | 2 | 1 | 1 |
| QSV1B0_HALMA | 1 | Hypothetical protein | rmAC1803 | 396 | 86.6 | 65 | 1393 | 0.9999 | K | ILGQIDEEAEVDVEAMEEEAQKIK | Q | 3 | 2715.3160 | 2715.3255 | 0.0095  | 0 | 3.50  | 3.659 | 0.281 | 0   | 1  | 31 | 92 | 2 | 1 | 1 |
| QSV1B0_HALMA | 1 | Hypothetical protein | rmAC1803 | 396 | 86.6 | 65 | 1393 | 0.9999 | K | ILGQIDEEAEVDVEAMEEEAQKIK | Q | 3 | 2715.3160 | 2715.3244 | 0.0084  | 0 | 3.09  | 4.17  | 0.247 | 0   | 1  | 34 | 92 | 2 | 1 | 1 |
| QSV1B0_HALMA | 1 | Hypothetical protein | rmAC1803 | 396 | 86.6 | 65 | 1393 | 0.9999 | K | ILGQIDEEAEVDVEAMEEEAQKIK | Q | 3 | 2715.3160 | 2715.3211 | 0.0051  | 0 | 1.88  | 4.465 | 0.22  | 0   | 1  | 32 | 92 | 2 | 1 | 1 |
| QSV1B0_HALMA | 1 | Hypothetical protein | rmAC1803 | 396 | 86.6 | 65 | 1393 | 0.9999 | K | ILGQIDEEAEVDVEAMEEEAQKIK | Q | 3 | 2715.3160 | 2715.3259 | 0.0099  | 0 | 3.63  | 4.033 | 0.263 | 0   | 1  | 32 | 92 | 2 | 1 | 1 |
| QSV1B0_HALMA | 1 | Hypothetical protein | rmAC1803 | 396 | 86.6 | 65 | 1393 | 0      |   |                          |   |   |           |           |         |   |       |       |       |     |    |    |    |   |   |   |













|              |   |                      |          |          |     |      |    |      |   |   |                 |                   |   |   |           |           |         |         |       |       |       |   |   |    |     |   |   |   |
|--------------|---|----------------------|----------|----------|-----|------|----|------|---|---|-----------------|-------------------|---|---|-----------|-----------|---------|---------|-------|-------|-------|---|---|----|-----|---|---|---|
| Q5UY43_HALMA | 1 | Hypothetical protein | rmAC3098 | rmAC3098 | 357 | 70.3 | 47 | 1272 | 1 | R | SADALVVLGAEQRYT | SESELNGLSAFSDAGGR | V | 3 | 3182.5480 | 3184.5382 | 1.9901  | -2.0067 | -5.20 | 5.527 | 0.281 | 0 | 5 | 33 | 120 | 2 | 1 | 1 |
| Q5UY43_HALMA | 1 | Hypothetical protein | rmAC3098 | rmAC3098 | 357 | 70.3 | 47 | 1272 | 1 | R | SADALVVLGAEQRYT | SESELNGLSAFSDAGGR | V | 3 | 3182.5480 | 3182.5303 | -0.0177 | 0       | -5.57 | 5.103 | 0.52  | 0 | 1 | 33 | 120 | 2 | 1 | 1 |
| Q5UY43_HALMA | 1 | Hypothetical protein | rmAC3098 | rmAC3098 | 357 | 70.3 | 47 | 1272 | 1 | R | SADALVVLGAEQRYT | SESELNGLSAFSDAGGR | V | 3 | 3182.5480 | 3184.5682 | 2.0201  | -2.0067 | 4.23  | 4.735 | 0.477 | 0 | 1 | 30 | 120 | 2 | 1 | 1 |
| Q5UY43_HALMA | 1 | Hypothetical protein | rmAC3098 | rmAC3098 | 357 | 70.3 | 47 | 1272 | 1 | R | SADALVVLGAEQRYT | SESELNGLSAFSDAGGR | V | 3 | 3182.5480 | 3182.5325 | -0.0155 | 0       | -4.88 | 5.29  | 0.556 | 0 | 1 | 36 | 120 | 2 | 1 | 1 |
| Q5UY43_HALMA | 1 | Hypothetical protein | rmAC3098 | rmAC3098 | 357 | 70.3 | 47 | 1272 | 1 | R | SADALVVLGAEQRYT | SESELNGLSAFSDAGGR | V | 3 | 3182.5480 | 3182.5391 | -0.0089 | 0       | -2.81 | 4.545 | 0.539 | 0 | 1 | 37 | 120 | 2 | 1 | 1 |
| Q5UY43_HALMA | 1 | Hypothetical protein | rmAC3098 | rmAC3098 | 357 | 70.3 | 47 | 1272 | 1 | R | SADALVVLGAEQRYT | SESELNGLSAFSDAGGR | V | 3 | 3182.5480 | 3182.5464 | -0.0016 | 0       | -0.51 | 5.087 | 0.53  | 0 | 1 | 40 | 120 | 2 | 1 | 1 |
| Q5UY43_HALMA | 1 | Hypothetical protein | rmAC3098 | rmAC3098 | 357 | 70.3 | 47 | 1272 | 1 | R | SADALVVLGAEQRYT | SESELNGLSAFSDAGGR | V | 3 | 3182.5480 | 3182.5724 | 0.0244  | 0       | 7.66  | 5.969 | 0.523 | 0 | 1 | 39 | 120 | 2 | 1 | 1 |
| Q5UY43_HALMA | 1 | Hypothetical protein | rmAC3098 | rmAC3098 | 357 | 70.3 | 47 | 1272 | 1 | R | SADALVVLGAEQRYT | SESELNGLSAFSDAGGR | V | 3 | 3182.5480 | 3182.5497 | 0.0017  | 0       | 0.53  | 4.765 | 0.48  | 0 | 1 | 38 | 120 | 2 | 1 | 1 |
| Q5UY43_HALMA | 1 | Hypothetical protein | rmAC3098 | rmAC3098 | 357 | 70.3 | 47 | 1272 | 1 | R | SADALVVLGAEQRYT | SESELNGLSAFSDAGGR | V | 2 | 3182.5480 | 3182.5472 | -0.0008 | 0       | -0.25 | 3.822 | 0.37  | 0 | 1 | 18 | 60  | 2 | 1 | 1 |
| Q5UY43_HALMA | 1 | Hypothetical protein | rmAC3098 | rmAC3098 | 357 | 70.3 | 47 | 1272 | 1 | R | SADALVVLGAEQRYT | SESELNGLSAFSDAGGR | V | 3 | 3182.5480 | 3182.5545 | 0.0064  | 0       | 2.02  | 4.778 | 0.533 | 0 | 1 | 36 | 120 | 2 | 1 | 1 |
| Q5UY43_HALMA | 1 | Hypothetical protein | rmAC3098 | rmAC3098 | 357 | 70.3 | 47 | 1272 | 1 | R | SADALVVLGAEQRYT | SESELNGLSAFSDAGGR | V | 3 | 3182.5480 | 3184.5682 | 2.0201  | -2.0067 | 4.23  | 4.371 | 0.464 | 0 | 1 | 30 | 120 | 2 | 1 | 1 |
| Q5UY43_HALMA | 1 | Hypothetical protein | rmAC3098 | rmAC3098 | 357 | 70.3 | 47 | 1272 | 1 | R | SADALVVLGAEQRYT | SESELNGLSAFSDAGGR | V | 3 | 3182.5480 | 3182.5493 | 0.0013  | 0       | 0.41  | 5.551 | 0.495 | 0 | 1 | 33 | 120 | 2 | 1 | 1 |
| Q5UY43_HALMA | 1 | Hypothetical protein | rmAC3098 | rmAC3098 | 357 | 70.3 | 47 | 1272 | 1 | R | SADALVVLGAEQRYT | SESELNGLSAFSDAGGR | V | 3 | 3182.5480 | 3182.5387 | -0.0093 | 0       | -2.92 | 4.502 | 0.391 | 0 | 1 | 31 | 120 | 2 | 1 | 1 |
| Q5UY43_HALMA | 1 | Hypothetical protein | rmAC3098 | rmAC3098 | 357 | 70.3 | 47 | 1272 | 1 | R | SADALVVLGAEQRYT | SESELNGLSAFSDAGGR | V | 3 | 3182.5480 | 3182.5365 | -0.0115 | 0       | -3.61 | 4.424 | 0.422 | 0 | 1 | 28 | 120 | 2 | 1 | 1 |
| Q5UY43_HALMA | 1 | Hypothetical protein | rmAC3098 | rmAC3098 | 357 | 70.3 | 47 | 1272 | 1 | R | SADALVVLGAEQRYT | SESELNGLSAFSDAGGR | V | 3 | 3182.5480 | 3184.5682 | 2.0201  | -2.0067 | 4.23  | 5.068 | 0.519 | 0 | 1 | 33 | 120 | 2 | 1 | 1 |
| Q5UY43_HALMA | 1 | Hypothetical protein | rmAC3098 | rmAC3098 | 357 | 70.3 | 47 | 1272 | 1 | R | SADALVVLGAEQRYT | SESELNGLSAFSDAGGR | V | 3 | 3182.5480 | 3184.5682 | 2.0201  | -2.0067 | 4.23  | 4.976 | 0.497 | 0 | 1 | 35 | 120 | 2 | 1 | 1 |
| Q5UY43_HALMA |   |                      |          |          |     |      |    |      |   |   |                 |                   |   |   |           |           |         |         |       |       |       |   |   |    |     |   |   |   |













|              |   |                    |     |          |     |      |    |      |        |   |            |   |   |           |           |         |   |       |       |       |     |   |    |    |   |   |   |
|--------------|---|--------------------|-----|----------|-----|------|----|------|--------|---|------------|---|---|-----------|-----------|---------|---|-------|-------|-------|-----|---|----|----|---|---|---|
| Q5UY42_HALMA | 1 | Proteinase IV-like | edp | rmAC3099 | 308 | 63.6 | 49 | 1106 | 0.9999 | R | AFVGAVMAER | G | 2 | 1049.5328 | 1049.5331 | 0.0002  | 0 | 0.22  | 2.708 | 0.228 | 0   | 1 | 16 | 18 | 2 | 0 | 1 |
| Q5UY42_HALMA | 1 | Proteinase IV-like | edp | rmAC3099 | 308 | 63.6 | 49 | 1106 | 0.9999 | R | AFVGAVMAER | G | 2 | 1049.5328 | 1049.5345 | 0.0017  | 0 | 1.62  | 2.931 | 0.241 | 0   | 1 | 17 | 18 | 2 | 0 | 1 |
| Q5UY42_HALMA | 1 | Proteinase IV-like | edp | rmAC3099 | 308 | 63.6 | 49 | 1106 | 0.9999 | R | AFVGAVMAER | G | 2 | 1049.5328 | 1049.5321 | -0.0007 | 0 | -0.71 | 2.872 | 0.2   | 0   | 1 | 16 | 18 | 2 | 0 | 1 |
| Q5UY42_HALMA | 1 | Proteinase IV-like | edp | rmAC3099 | 308 | 63.6 | 49 | 1106 | 0.9999 | R | AFVGAVMAER | G | 2 | 1049.5328 | 1049.5344 | 0.0016  | 0 | 1.50  | 2.789 | 0.242 | 0   | 1 | 16 | 18 | 2 | 0 | 1 |
| Q5UY42_HALMA | 1 | Proteinase IV-like | edp | rmAC3099 | 308 | 63.6 | 49 | 1106 | 0.9999 | R | AFVGAVMAER | G | 2 | 1065.5328 | 1065.5254 | -0.0074 | 0 | -6.92 | 2.38  | 0.311 | 0.2 | 1 | 17 | 18 | 2 | 0 | 1 |
| Q5UY42_HALMA | 1 | Proteinase IV-like | edp | rmAC3099 | 308 | 63.6 | 49 | 1106 | 0.9999 | R | AFVGAVMAER | G | 2 | 1049.5328 | 1049.5354 | 0.0026  | 0 | 2.43  | 3.119 | 0.183 | 0   | 1 | 17 | 18 | 2 | 0 | 1 |
| Q5UY42_HALMA | 1 | Proteinase IV-like | edp | rmAC3099 | 308 | 63.6 | 49 | 1106 | 0.9999 | R | AFVGAVMAER | G | 2 | 1049.5328 | 1049.5329 | 0.0001  | 0 | 0.10  | 2.691 | 0.246 | 0   | 1 | 16 | 18 | 2 | 0 | 1 |
| Q5UY42_HALMA | 1 | Proteinase IV-like | edp | rmAC3099 | 308 | 63.6 | 49 | 1106 | 0.9999 | R | AFVGAVMAER | G | 2 | 1049.5328 | 1049.5254 | -0.0074 | 0 | -7.03 | 2.752 | 0.243 | 0   | 1 | 16 | 18 | 2 | 0 | 1 |
| Q5UY42_HALMA | 1 | Proteinase IV-like | edp | rmAC3099 | 308 | 63.6 | 49 | 1106 | 0.9999 | R | AFVGAVMAER | G | 2 | 1049.5328 | 1049.5344 | 0.0016  | 0 | 1.50  | 3.339 | 0.191 | 0   | 1 | 17 | 18 | 2 | 0 | 1 |
| Q5UY42_HALMA | 1 | Proteinase IV-like | edp | rmAC3099 | 308 | 63.6 | 49 | 1106 | 0.9999 | R | AFVGAVMAER | G | 2 | 1049.5328 | 1049.5328 | 0.0000  | 0 | -0.01 | 2.712 | 0.234 | 0   | 1 | 17 | 18 | 2 | 0 | 1 |
| Q5UY42_HALMA | 1 | Proteinase IV-like | edp | rmAC3099 | 308 | 63.6 | 49 | 1106 | 0.9999 | R | AFVGAVMAER | G | 2 | 1049.5328 | 1049.5346 | 0.0018  | 0 | 1.73  | 2.936 | 0.196 | 0   | 1 | 17 | 18 | 2 | 0 | 1 |
| Q5UY42_HALMA | 1 | Proteinase IV-like | edp | rmAC3099 | 308 | 63.6 | 49 | 1106 | 0.9998 | R | AFVGAVMAER | G | 2 | 1049.5328 | 1049.5338 | 0.0010  | 0 | 0.92  | 2.838 | 0.193 | 0   | 1 | 17 | 18 | 2 | 0 | 1 |
| Q5UY42_HALMA | 1 | Proteinase IV-like | edp | rmAC3099 | 308 | 63.6 | 49 | 1106 | 0.9998 | R | AFVGAVMAER | G | 2 | 1049.5328 | 1049.5254 | -0.0074 | 0 | -7.03 | 2.68  | 0.215 | 0   | 1 | 17 | 18 | 2 | 0 | 1 |
| Q5UY42_HALMA | 1 | Proteinase IV-like | edp | rmAC3099 | 308 | 63.6 | 49 | 1106 | 0.9998 | R | AFVGAVMAER | G | 2 | 1049.5328 | 1049.5454 | 0.0126  | 0 | 12.03 | 2.663 | 0.222 | 0   | 1 | 16 | 18 | 2 | 0 | 1 |
| Q5UY42_HALMA | 1 | Proteinase IV-like | edp | rmAC3099 | 308 | 63.6 | 49 | 1106 | 0.9998 | R | AFVGAVMAER | G | 2 | 1049.5328 | 1049.5338 | 0.0010  | 0 | 0.92  | 2.836 | 0.184 | 0   | 1 | 17 | 18 | 2 | 0 | 1 |
| Q5UY42_HALMA | 1 | Proteinase IV-like | edp | rmAC3099 | 308 | 63.6 | 49 | 1106 | 0.9998 | R | AFVGAVMAER | G | 2 | 1049.5328 | 1049.5345 | 0.0017  | 0 | 1.62  | 2.86  | 0.188 | 0   | 1 | 17 | 18 | 2 | 0 | 1 |
| Q5UY42_HALMA | 1 | Proteinase IV-like | edp | rmAC3099 | 308 | 63.6 | 49 | 1106 | 0.9998 | R | AFVGAVMAER | G | 2 | 1049.5328 | 1049.5333 | 0.0005  | 0 | 0.45  | 2.842 | 0.194 | 0   | 1 | 17 | 18 | 2 | 0 | 1 |
| Q            |   |                    |     |          |     |      |    |      |        |   |            |   |   |           |           |         |   |       |       |       |     |   |    |    |   |   |   |











|              |   |                    |     |          |     |      |    |      |        |   |                     |   |   |           |           |         |         |        |       |         |     |    |    |    |   |   |   |
|--------------|---|--------------------|-----|----------|-----|------|----|------|--------|---|---------------------|---|---|-----------|-----------|---------|---------|--------|-------|---------|-----|----|----|----|---|---|---|
| Q5UY42_HALMA | 1 | Proteinase IV-like | edp | rmAC3099 | 308 | 63.6 | 49 | 1106 | 1      | R | ISSPGGSAASSESMYLAVK | R | 2 | 1840.8877 | 1840.9054 | 0.0177  | 0       | 9.63   | 3.89  | 0.533   | 0   | 1  | 20 | 36 | 2 | 0 | 1 |
| Q5UY42_HALMA | 1 | Proteinase IV-like | edp | rmAC3099 | 308 | 63.6 | 49 | 1106 | 1      | R | ISSPGGSAASSESMYLAVK | R | 2 | 1840.8877 | 1840.8984 | 0.0107  | 0       | 5.81   | 3.587 | 0.532   | 0   | 1  | 21 | 36 | 2 | 0 | 1 |
| Q5UY42_HALMA | 1 | Proteinase IV-like | edp | rmAC3099 | 308 | 63.6 | 49 | 1106 | 0.9999 | R | ISSPGGSAASSESMYLAVK | R | 2 | 1840.8877 | 1840.8854 | -0.0023 | 0       | -1.24  | 2.898 | 0.286   | 0   | 1  | 15 | 36 | 2 | 0 | 1 |
| Q5UY42_HALMA | 1 | Proteinase IV-like | edp | rmAC3099 | 308 | 63.6 | 49 | 1106 | 0.9999 | R | ISSPGGSAASSESMYLAVK | R | 2 | 1840.8877 | 1840.8854 | -0.0023 | 0       | -1.24  | 3.045 | 0.256   | 0   | 2  | 15 | 36 | 2 | 0 | 1 |
| Q5UY42_HALMA | 1 | Proteinase IV-like | edp | rmAC3099 | 308 | 63.6 | 49 | 1106 | 0.9998 | R | ISSPGGSAASSESMYLAVK | R | 2 | 1856.8877 | 1856.8854 | -0.0024 | 0       | -1.28  | 3.453 | 0.174   | 0   | 1  | 20 | 36 | 2 | 0 | 1 |
| Q5UY42_HALMA | 1 | Proteinase IV-like | edp | rmAC3099 | 308 | 63.6 | 49 | 1106 | 0.9998 | R | ISSPGGSAASSESMYLAVK | R | 2 | 1840.8877 | 1840.8854 | -0.0023 | 0       | -1.24  | 3.506 | 0.198   | 0   | 4  | 16 | 36 | 2 | 0 | 1 |
| Q5UY42_HALMA | 1 | Proteinase IV-like | edp | rmAC3099 | 308 | 63.6 | 49 | 1106 | 0.9997 | R | ISSPGGSAASSESMYLAVK | R | 2 | 1840.8877 | 1840.8951 | 0.0074  | 0       | 4.01   | 3.272 | 0.116   | 0.1 | 1  | 21 | 36 | 2 | 0 | 1 |
| Q5UY42_HALMA | 1 | Proteinase IV-like | edp | rmAC3099 | 308 | 63.6 | 49 | 1106 | 0.9997 | R | ISSPGGSAASSESMYLAVK | R | 2 | 1840.8877 | 1840.8902 | 0.0025  | 0       | 1.36   | 3.177 | 0.166   | 0.3 | 1  | 21 | 36 | 2 | 0 | 1 |
| Q5UY42_HALMA | 1 | Proteinase IV-like | edp | rmAC3099 | 308 | 63.6 | 49 | 1106 | 0.9996 | R | ISSPGGSAASSESMYLAVK | R | 2 | 1856.8877 | 1858.8654 | 1.9777  | -2.0067 | -15.60 | 3.185 | 0.273   | 0   | 1  | 16 | 36 | 2 | 0 | 1 |
| Q5UY42_HALMA | 1 | Proteinase IV-like | edp | rmAC3099 | 308 | 63.6 | 49 | 1106 | 0.9995 | R | ISSPGGSAASSESMYLAVK | R | 2 | 1856.8877 | 1856.8839 | -0.0038 | 0       | -2.07  | 3.372 | 0.12    | 0.2 | 1  | 21 | 36 | 2 | 0 | 1 |
| Q5UY42_HALMA | 1 | Proteinase IV-like | edp | rmAC3099 | 308 | 63.6 | 49 | 1106 | 0.9992 | R | ISSPGGSAASSESMYLAVK | R | 2 | 1840.8877 | 1840.8908 | 0.0031  | 0       | 1.69   | 2.875 | 0.154   | 0.5 | 1  | 26 | 36 | 2 | 0 | 1 |
| Q5UY42_HALMA | 1 | Proteinase IV-like | edp | rmAC3099 | 308 | 63.6 | 49 | 1106 | 0.9989 | R | ISSPGGSAASSESMYLAVK | R | 2 | 1840.8877 | 1840.8911 | 0.0034  | 0       | 1.83   | 2.896 | 0.135   | 0.3 | 1  | 20 | 36 | 2 | 0 | 1 |
| Q5UY42_HALMA | 1 | Proteinase IV-like | edp | rmAC3099 | 308 | 63.6 | 49 | 1106 | 0.9989 | R | ISSPGGSAASSESMYLAVK | R | 2 | 1840.8877 | 1840.8922 | 0.0045  | 0       | 2.42   | 2.986 | 0.125   | 0.4 | 1  | 23 | 36 | 2 | 0 | 1 |
| Q5UY42_HALMA | 1 | Proteinase IV-like | edp | rmAC3099 | 308 | 63.6 | 49 | 1106 | 0.9988 | R | ISSPGGSAASSESMYLAVK | R | 2 | 1840.8877 | 1840.9054 | 0.0177  | 0       | 9.63   | 2.612 | 0.216   | 0.1 | 6  | 14 | 36 | 2 | 0 | 1 |
| Q5UY42_HALMA | 1 | Proteinase IV-like | edp | rmAC3099 | 308 | 63.6 | 49 | 1106 | 0.9984 | R | ISSPGGSAASSESMYLAVK | R | 2 | 1856.8877 | 1856.8879 | 0.0002  | 0       | 0.10   | 2.917 | 0.111   | 0.2 | 1  | 20 | 36 | 2 | 0 | 1 |
| Q5UY42_HALMA | 1 | Proteinase IV-like | edp | rmAC3099 | 308 | 63.6 | 49 | 1106 | 0.9977 | R | ISSPGGSAASSESMYLAVK | R | 2 | 1840.8877 | 1840.8854 | -0.0023 | 0       | -1.24  | 2.753 | 0.18    | 0.1 | 12 | 12 | 36 | 2 | 0 | 1 |
| Q5UY42_HALMA | 1 | Proteinase IV-like | edp | rmAC3099 | 308 | 63.6 | 49 | 1106 | 0.9972 | R | ISSPGGSAASSESMYLAVK | R | 2 | 1840.8877 | 1840.9054 | 0.0177  | 0       | 9.63   | 1.97  | 0.226</ |     |    |    |    |   |   |   |









[illegible]







[illegible]













|              |   |                                       |      |          |     |      |    |     |   |   |              |   |   |           |           |         |   |       |       |       |   |   |    |    |   |   |   |
|--------------|---|---------------------------------------|------|----------|-----|------|----|-----|---|---|--------------|---|---|-----------|-----------|---------|---|-------|-------|-------|---|---|----|----|---|---|---|
| QSV092_HALMA | 1 | Dipeptide ABC transporter ATP-binding | dppd | rmAC2228 | 575 | 63.8 | 29 | 589 | 1 | R | NLAMFASAVLSK | A | 2 | 1250.6693 | 1250.6676 | -0.0017 | 0 | -1.40 | 2.912 | 0.36  | 0 | 1 | 16 | 22 | 2 | 0 | 1 |
| QSV092_HALMA | 1 | Dipeptide ABC transporter ATP-binding | dppd | rmAC2228 | 575 | 63.8 | 29 | 589 | 1 | R | NLAMFASAVLSK | A | 2 | 1250.6693 | 1250.6777 | 0.0084  | 0 | 6.70  | 2.858 | 0.461 | 0 | 1 | 18 | 22 | 2 | 0 | 1 |
| QSV092_HALMA | 1 | Dipeptide ABC transporter ATP-binding | dppd | rmAC2228 | 575 | 63.8 | 29 | 589 | 1 | R | NLAMFASAVLSK | A | 2 | 1250.6693 | 1250.6701 | 0.0008  | 0 | 0.65  | 3.836 | 0.488 | 0 | 1 | 20 | 22 | 2 | 0 | 1 |
| QSV092_HALMA | 1 | Dipeptide ABC transporter ATP-binding | dppd | rmAC2228 | 575 | 63.8 | 29 | 589 | 1 | R | NLAMFASAVLSK | A | 2 | 1250.6693 | 1250.6737 | 0.0044  | 0 | 3.48  | 3.333 | 0.488 | 0 | 1 | 20 | 22 | 2 | 0 | 1 |
| QSV092_HALMA | 1 | Dipeptide ABC transporter ATP-binding | dppd | rmAC2228 | 575 | 63.8 | 29 | 589 | 1 | R | NLAMFASAVLSK | A | 2 | 1250.6693 | 1250.6721 | 0.0028  | 0 | 2.21  | 3.669 | 0.491 | 0 | 1 | 20 | 22 | 2 | 0 | 1 |
| QSV092_HALMA | 1 | Dipeptide ABC transporter ATP-binding | dppd | rmAC2228 | 575 | 63.8 | 29 | 589 | 1 | R | NLAMFASAVLSK | A | 2 | 1250.6693 | 1250.6799 | 0.0106  | 0 | 8.46  | 3.123 | 0.454 | 0 | 1 | 17 | 22 | 2 | 0 | 1 |
| QSV092_HALMA | 1 | Dipeptide ABC transporter ATP-binding | dppd | rmAC2228 | 575 | 63.8 | 29 | 589 | 1 | R | NLAMFASAVLSK | A | 2 | 1250.6693 | 1250.6734 | 0.0041  | 0 | 3.29  | 3.117 | 0.509 | 0 | 1 | 19 | 22 | 2 | 0 | 1 |
| QSV092_HALMA | 1 | Dipeptide ABC transporter ATP-binding | dppd | rmAC2228 | 575 | 63.8 | 29 | 589 | 1 | R | NLAMFASAVLSK | A | 2 | 1250.6693 | 1250.6686 | -0.0008 | 0 | -0.62 | 3.69  | 0.513 | 0 | 1 | 19 | 22 | 2 | 0 | 1 |
| QSV092_HALMA | 1 | Dipeptide ABC transporter ATP-binding | dppd | rmAC2228 | 575 | 63.8 | 29 | 589 | 1 | R | NLAMFASAVLSK | A | 2 | 1250.6693 | 1250.6654 | -0.0039 | 0 | -3.10 | 4.125 | 0.463 | 0 | 1 | 20 | 22 | 2 | 0 | 1 |
| QSV092_HALMA | 1 | Dipeptide ABC transporter ATP-binding | dppd | rmAC2228 | 575 | 63.8 | 29 | 589 | 1 | R | NLAMFASAVLSK | A | 2 | 1250.6693 | 1250.6684 | -0.0009 | 0 | -0.71 | 3.444 | 0.263 | 0 | 1 | 20 | 22 | 2 | 0 | 1 |
| QSV092_HALMA | 1 | Dipeptide ABC transporter ATP-binding | dppd | rmAC2228 | 575 | 63.8 | 29 | 589 | 1 | R | NLAMFASAVLSK | A | 2 | 1250.6693 | 1250.6733 | 0.0040  | 0 | 3.19  | 4.266 | 0.39  | 0 | 1 | 20 | 22 | 2 | 0 | 1 |
| QSV092_HALMA | 1 | Dipeptide ABC transporter ATP-binding | dppd | rmAC2228 | 575 | 63.8 | 29 | 589 | 1 | R | NLAMFASAVLSK | A | 2 | 1250.6693 | 1250.6714 | 0.0020  | 0 | 1.63  | 3.08  | 0.532 | 0 | 1 | 20 | 22 | 2 | 0 | 1 |
| QSV092_HALMA | 1 | Dipeptide ABC transporter ATP-binding | dppd | rmAC2228 | 575 | 63.8 | 29 | 589 | 1 | R | NLAMFASAVLSK | A | 2 | 1250.6693 | 1250.6712 | 0.0019  | 0 | 1.53  | 3.683 | 0.477 | 0 | 1 | 19 | 22 | 2 | 0 | 1 |
| QSV092_HALMA | 1 | Dipeptide ABC transporter ATP-binding | dppd | rmAC2228 | 575 | 63.8 | 29 | 589 | 1 | R | NLAMFASAVLSK | A | 2 | 1250.6693 | 1250.6690 | -0.0003 | 0 | -0.23 | 2.716 | 0.509 | 0 | 1 | 17 | 22 | 2 | 0 | 1 |
| QSV092_HALMA | 1 | Dipeptide ABC transporter ATP-binding | dppd | rmAC2228 | 575 | 63.8 | 29 | 589 | 1 | R | NLAMFASAVLSK | A | 2 | 1250.6693 | 1250.6688 | -0.0005 | 0 | -0.42 | 3.224 | 0.472 | 0 | 1 | 18 | 22 | 2 | 0 | 1 |
| QSV092_HALMA | 1 | Dipeptide ABC transporter ATP-binding | dppd | rmAC2228 | 575 | 63.8 | 29 | 589 | 1 | R | NLAMFASAVLSK | A | 2 | 1250.6693 | 1250.6733 | 0.0040  | 0 | 4.19  | 3.34  | 0.482 | 0 | 1 | 19 | 22 | 2 | 0 | 1 |
| QSV092_HALMA | 1 | Dipeptide ABC transporter ATP-binding | dppd | rmAC2228 | 575 | 63.8 | 29 | 589 | 1 | R | NLAMFASAVLSK | A | 2 | 1250.6693 | 1250.6755 | 0.0062  | 0 | 4.95  | 3.62  | 0.543 | 0 | 1 | 20 | 22 | 2 | 0 | 1 |
| QSV092_HALMA | 1 | Dipeptide ABC transporter ATP-binding | dppd | rmAC2228 | 575 | 63.8 | 29 | 589 | 1 | R | NLAMFASAVLSK | A | 2 | 1250.6    |           |         |   |       |       |       |   |   |    |    |   |   |   |





|              |   |                                             |      |          |     |      |    |     |        |   |                    |   |   |           |           |         |         |        |       |       |   |   |    |     |   |   |   |
|--------------|---|---------------------------------------------|------|----------|-----|------|----|-----|--------|---|--------------------|---|---|-----------|-----------|---------|---------|--------|-------|-------|---|---|----|-----|---|---|---|
| QSUXLI_HALMA | 1 | Dipeptide ABC transporter dipeptide-binding | dppa | rmAC3299 | 621 | 33.5 | 21 | 465 | 0.9999 | D | PGKVSVEEEDDQGR     | Q | 3 | 1543.7114 | 1543.7085 | -0.0029 | 0       | -1.88  | 3.795 | 0.406 | 0 | 1 | 25 | 52  | 1 | 1 | 1 |
| QSUXLI_HALMA | 1 | Dipeptide ABC transporter dipeptide-binding | dppa | rmAC3299 | 621 | 33.5 | 21 | 465 | 0.9967 | D | PGKVSVEEEDDQGR     | N | 3 | 1543.7114 | 1542.6982 | -1.0133 | 1       | -8.59  | 3.938 | 0.435 | 0 | 1 | 29 | 52  | 1 | 1 | 1 |
| QSUXLI_HALMA | 1 | Dipeptide ABC transporter dipeptide-binding | dppa | rmAC3299 | 621 | 33.5 | 21 | 465 | 1      | D | PGKVSVEEEDDQGR     | Q | 3 | 2547.2201 | 2547.2191 | -0.0010 | 0       | -0.39  | 4.768 | 0.423 | 0 | 1 | 41 | 88  | 1 | 2 | 1 |
| QSUXLI_HALMA | 1 | Dipeptide ABC transporter dipeptide-binding | dppa | rmAC3299 | 621 | 33.5 | 21 | 465 | 1      | D | PGKVSVEEEDDQGR     | N | 4 | 2547.2201 | 2547.2204 | 0.0003  | 0       | 0.11   | 4.905 | 0.478 | 0 | 1 | 39 | 132 | 1 | 2 | 1 |
| QSUXLI_HALMA | 1 | Dipeptide ABC transporter dipeptide-binding | dppa | rmAC3299 | 621 | 33.5 | 21 | 465 | 1      | R | QAVAYAMNQHTVVEQVFK | Q | 3 | 2062.0306 | 2063.8882 | 1.8575  | -2.0067 | -72.33 | 2.978 | 0.357 | 0 | 1 | 22 | 68  | 2 | 0 | 1 |
| QSUXLI_HALMA | 1 | Dipeptide ABC transporter dipeptide-binding | dppa | rmAC3299 | 621 | 33.5 | 21 | 465 | 1      | R | QAVAYAMNQHTVVEQVFK | Q | 3 | 2078.0306 | 2078.0273 | -0.0033 | 0       | -1.60  | 2.763 | 0.377 | 0 | 1 | 27 | 68  | 2 | 0 | 1 |
| QSUXLI_HALMA | 1 | Dipeptide ABC transporter dipeptide-binding | dppa | rmAC3299 | 621 | 33.5 | 21 | 465 | 1      | R | QAVAYAMNQHTVVEQVFK | Q | 3 | 2062.0306 | 2063.0482 | 1.0175  | -1.0034 | 6.88   | 3.187 | 0.405 | 0 | 1 | 22 | 68  | 2 | 0 | 1 |
| QSUXLI_HALMA | 1 | Dipeptide ABC transporter dipeptide-binding | dppa | rmAC3299 | 621 | 33.5 | 21 | 465 | 1      | R | QAVAYAMNQHTVVEQVFK | Q | 3 | 2062.0306 | 2062.0398 | 0.0092  | 0       | 4.46   | 3.179 | 0.293 | 0 | 1 | 28 | 68  | 2 | 0 | 1 |
| QSUXLI_HALMA | 1 | Dipeptide ABC transporter dipeptide-binding | dppa | rmAC3299 | 621 | 33.5 | 21 | 465 | 1      | R | QAVAYAMNQHTVVEQVFK | Q | 3 | 2062.0306 | 2062.0323 | 0.0017  | 0       | 0.82   | 3.033 | 0.367 | 0 | 1 | 26 | 68  | 2 | 0 | 1 |
| QSUXLI_HALMA | 1 | Dipeptide ABC transporter dipeptide-binding | dppa | rmAC3299 | 621 | 33.5 | 21 | 465 | 1      | R | QAVAYAMNQHTVVEQVFK | Q | 3 | 2062.0306 | 2063.0482 | 1.0175  | -1.0034 | 6.88   | 3.091 | 0.321 | 0 | 2 | 20 | 68  | 2 | 0 | 1 |
| QSUXLI_HALMA | 1 | Dipeptide ABC transporter dipeptide-binding | dppa | rmAC3299 | 621 | 33.5 | 21 | 465 | 1      | R | QAVAYAMNQHTVVEQVFK | Q | 3 | 2062.0306 | 2062.0362 | 0.0055  | 0       | 2.68   | 2.701 | 0.308 | 0 | 1 | 24 | 68  | 2 | 0 | 1 |
| QSUXLI_HALMA | 1 | Dipeptide ABC transporter dipeptide-binding | dppa | rmAC3299 | 621 | 33.5 | 21 | 465 | 1      | R | QAVAYAMNQHTVVEQVFK | Q | 3 | 2062.0306 | 2062.0349 | 0.0042  | 0       | 2.06   | 3.142 | 0.45  | 0 | 1 | 30 | 68  | 2 | 0 | 1 |
| QSUXLI_HALMA | 1 | Dipeptide ABC transporter dipeptide-binding | dppa | rmAC3299 | 621 | 33.5 | 21 | 465 | 1      | R | QAVAYAMNQHTVVEQVFK | Q | 3 | 2078.0306 | 2078.0260 | -0.0046 | 0       | -2.21  | 2.647 | 0.333 | 0 | 1 | 23 | 68  | 2 | 0 | 1 |
| QSUXLI_HALMA | 1 | Dipeptide ABC transporter dipeptide-binding | dppa | rmAC3299 | 621 | 33.5 | 21 | 465 | 1      | R | QAVAYAMNQHTVVEQVFK | Q | 3 | 2078.0306 | 2078.0271 | -0.0035 | 0       | -1.69  | 2.643 | 0.35  | 0 | 1 | 26 | 68  | 2 | 0 | 1 |
| QSUXLI_HALMA | 1 | Dipeptide ABC transporter dipeptide-binding | dppa | rmAC3299 | 621 | 33.5 | 21 | 465 | 1      | R | QAVAYAMNQHTVVEQVFK | Q | 3 | 2062.0306 | 2062.0254 | -0.0053 | 0       | -2.56  | 3.178 | 0.349 | 0 | 1 | 24 | 68  | 2 | 0 | 1 |
| QSUXLI_HALMA | 1 | Dipeptide ABC transporter dipeptide-binding | dppa | rmAC3299 | 621 | 33.5 | 21 | 465 | 1      | R | QAVAYAMNQHTVVEQVFK | Q | 2 | 2062.0306 | 2062.0338 | 0.0032  | 0       | 1.53   | 5.54  | 0.543 | 0 | 1 | 21 | 34  | 2 | 0 | 1 |
| QSUXLI_HALMA | 1 | Dipeptide ABC transporter dipeptide-binding | dppa | rmAC3299 | 621 | 33.5 | 21 | 465 | 1      | R | QAVAYAMNQHTVVEQVFK | Q | 3 | 2062.0306 | 2063.0482 | 1.0175  | -1.0034 | 6.88   | 2.777 | 0.378 | 0 | 1 | 26 | 68  | 2 | 0 | 1 |





[illegible]





|  |              |   |                                           |       |         |     |      |    |     |        |   |                               |   |   |           |           |          |         |       |       |       |     |   |    |     |   |   |   |  |
|--|--------------|---|-------------------------------------------|-------|---------|-----|------|----|-----|--------|---|-------------------------------|---|---|-----------|-----------|----------|---------|-------|-------|-------|-----|---|----|-----|---|---|---|--|
|  | Q5UW70_HALMA | 1 | ABC transporter phosphate-binding protein | plmD1 | rmb0319 | 389 | 50.9 | 28 | 263 | 0.9996 | K | AGDFGYRLWLATQADNDDISSLADLEGKR | V | 4 | 3196.5425 | 3196.5441 | 0.0016   | 0       | 0.50  | 3.584 | 0.202 | 0.2 | 3 | 38 | 168 | 2 | 1 | 1 |  |
|  | Q5UW70_HALMA | 1 | ABC transporter phosphate-binding protein | plmD1 | rmb0319 | 389 | 50.9 | 28 | 263 | 0.9996 | K | AGDFGYRLWLATQADNDDISSLADLEGKR | V | 4 | 3196.5425 | 3196.5522 | 0.0097   | 0       | 3.02  | 3.318 | 0.216 | 0.2 | 4 | 40 | 168 | 2 | 1 | 1 |  |
|  | Q5UW70_HALMA | 1 | ABC transporter phosphate-binding protein | plmD1 | rmb0319 | 389 | 50.9 | 28 | 263 | 0.9996 | K | AGDFGYRLWLATQADNDDISSLADLEGKR | V | 4 | 3196.5425 | 3196.5368 | -0.0057  | 0       | -1.79 | 4.369 | 0.205 | 0.1 | 4 | 38 | 168 | 2 | 1 | 1 |  |
|  | Q5UW70_HALMA | 1 | ABC transporter phosphate-binding protein | plmD1 | rmb0319 | 389 | 50.9 | 28 | 263 | 0.9996 | K | AGDFGYRLWLATQADNDDISSLADLEGKR | V | 4 | 3196.5425 | 3196.5410 | -0.0016  | 0       | -0.49 | 3.875 | 0.154 | 0.2 | 1 | 41 | 168 | 2 | 1 | 1 |  |
|  | Q5UW70_HALMA | 1 | ABC transporter phosphate-binding protein | plmD1 | rmb0319 | 389 | 50.9 | 28 | 263 | 0.9995 | K | AGDFGYRLWLATQADNDDISSLADLEGKR | V | 4 | 3196.5425 | 3196.5353 | -0.0072  | 0       | -2.24 | 3.917 | 0.21  | 0.3 | 5 | 35 | 168 | 2 | 1 | 1 |  |
|  | Q5UW70_HALMA | 1 | ABC transporter phosphate-binding protein | plmD1 | rmb0319 | 389 | 50.9 | 28 | 263 | 0.9995 | K | AGDFGYRLWLATQADNDDISSLADLEGKR | V | 4 | 3196.5425 | 3197.5446 | 1.0021   | -1.0034 | -0.39 | 3.175 | 0.21  | 0.6 | 1 | 40 | 168 | 2 | 1 | 1 |  |
|  | Q5UW70_HALMA | 1 | ABC transporter phosphate-binding protein | plmD1 | rmb0319 | 389 | 50.9 | 28 | 263 | 0.9994 | K | AGDFGYRLWLATQADNDDISSLADLEGKR | V | 4 | 3196.5425 | 3197.5473 | 1.0048   | -1.0034 | 0.45  | 3.81  | 0.199 | 0.2 | 1 | 43 | 168 | 2 | 1 | 1 |  |
|  | Q5UW70_HALMA | 1 | ABC transporter phosphate-binding protein | plmD1 | rmb0319 | 389 | 50.9 | 28 | 263 | 0.9993 | K | AGDFGYRLWLATQADNDDISSLADLEGKR | V | 4 | 3196.5425 | 3196.5400 | -0.0025  | 0       | -0.79 | 4.008 | 0.172 | 0.1 | 3 | 36 | 168 | 2 | 1 | 1 |  |
|  | Q5UW70_HALMA | 1 | ABC transporter phosphate-binding protein | plmD1 | rmb0319 | 389 | 50.9 | 28 | 263 | 0.9993 | K | AGDFGYRLWLATQADNDDISSLADLEGKR | V | 4 | 3196.5425 | 3196.5493 | 0.0067   | 0       | 2.11  | 3.51  | 0.14  | 0.3 | 1 | 41 | 168 | 2 | 1 | 1 |  |
|  | Q5UW70_HALMA | 1 | ABC transporter phosphate-binding protein | plmD1 | rmb0319 | 389 | 50.9 | 28 | 263 | 0.9992 | K | AGDFGYRLWLATQADNDDISSLADLEGKR | V | 4 | 3196.5425 | 3197.5709 | 1.0284   | -1.0034 | 7.83  | 3.654 | 0.226 | 0.1 | 3 | 38 | 168 | 2 | 1 | 1 |  |
|  | Q5UW70_HALMA | 1 | ABC transporter phosphate-binding protein | plmD1 | rmb0319 | 389 | 50.9 | 28 | 263 | 0.9991 | K | AGDFGYRLWLATQADNDDISSLADLEGKR | V | 4 | 3196.5425 | 3196.5436 | 0.0011   | 0       | 0.35  | 3.696 | 0.179 | 0.6 | 4 | 39 | 168 | 2 | 1 | 1 |  |
|  | Q5UW70_HALMA | 1 | ABC transporter phosphate-binding protein | plmD1 | rmb0319 | 389 | 50.9 | 28 | 263 | 0.9990 | K | AGDFGYRLWLATQADNDDISSLADLEGKR | V | 4 | 3196.5425 | 3197.5432 | 1.0006   | -1.0034 | -0.85 | 3.349 | 0.204 | 0.6 | 2 | 40 | 168 | 2 | 1 | 1 |  |
|  | Q5UW70_HALMA | 1 | ABC transporter phosphate-binding protein | plmD1 | rmb0319 | 389 | 50.9 | 28 | 263 | 0.9989 | K | AGDFGYRLWLATQADNDDISSLADLEGKR | V | 4 | 3196.5425 | 3196.5522 | 0.0097   | 0       | 3.02  | 3.362 | 0.12  | 0.3 | 1 | 41 | 168 | 2 | 1 | 1 |  |
|  | Q5UW70_HALMA | 1 | ABC transporter phosphate-binding protein | plmD1 | rmb0319 | 389 | 50.9 | 28 | 263 | 0.9980 | K | AGDFGYRLWLATQADNDDISSLADLEGKR | V | 4 | 3196.5425 | 3197.5309 | 0.9884   | -1.0034 | -4.69 | 3.815 | 0.207 | 0.2 | 5 | 38 | 168 | 2 | 1 | 1 |  |
|  | Q5UW70_HALMA | 1 | ABC transporter phosphate-binding protein | plmD1 | rmb0319 | 389 | 50.9 | 28 | 263 | 0.9950 | K | AGDFGYRLWLATQADNDDISSLADLEGKR | V | 4 | 3196.5425 | 3197.5309 | 0.9884   | -1.0034 | -4.69 | 3.231 | 0.155 | 0.9 | 3 | 37 | 168 | 2 | 1 | 1 |  |
|  | Q5UW70_HALMA | 1 | ABC transporter phosphate-binding protein | plmD1 | rmb0319 | 389 | 50.9 | 28 | 263 | 0.9941 | K | AGDFGYRLWLATQADNDDISSLADLEGKR | V | 4 | 3196.5425 | 3197.5309 | 0.9884</ |         |       |       |       |     |   |    |     |   |   |   |  |





|              |   |                      |          |          |     |      |    |     |        |   |                  |   |   |           |           |         |         |       |       |       |     |   |    |    |   |   |   |
|--------------|---|----------------------|----------|----------|-----|------|----|-----|--------|---|------------------|---|---|-----------|-----------|---------|---------|-------|-------|-------|-----|---|----|----|---|---|---|
| QSV5G6_HALMA | 1 | Hypothetical protein | rmAC0170 | rmAC0170 | 323 | 59.4 | 21 | 222 | 1      | R | YKIEETDASGFVTEWR | T | 2 | 1929.9108 | 1929.9065 | -0.0044 | 0       | -2.26 | 5.361 | 0.57  | 0   | 1 | 27 | 30 | 2 | 1 | 1 |
| QSV5G6_HALMA | 1 | Hypothetical protein | rmAC0170 | rmAC0170 | 323 | 59.4 | 21 | 222 | 1      | R | YKIEETDASGFVTEWR | T | 2 | 1929.9108 | 1929.9079 | -0.0029 | 0       | -1.50 | 4.652 | 0.52  | 0   | 1 | 26 | 30 | 2 | 1 | 1 |
| QSV5G6_HALMA | 1 | Hypothetical protein | rmAC0170 | rmAC0170 | 323 | 59.4 | 21 | 222 | 1      | R | YKIEETDASGFVTEWR | T | 2 | 1929.9108 | 1929.9145 | 0.0037  | 0       | 1.92  | 6.129 | 0.612 | 0   | 1 | 27 | 30 | 2 | 1 | 1 |
| QSV5G6_HALMA | 1 | Hypothetical protein | rmAC0170 | rmAC0170 | 323 | 59.4 | 21 | 222 | 1      | R | YKIEETDASGFVTEWR | T | 3 | 1929.9108 | 1929.9175 | 0.0067  | 0       | 3.46  | 5.168 | 0.379 | 0   | 1 | 31 | 60 | 2 | 1 | 1 |
| QSV5G6_HALMA | 1 | Hypothetical protein | rmAC0170 | rmAC0170 | 323 | 59.4 | 21 | 222 | 1      | R | YKIEETDASGFVTEWR | T | 3 | 1929.9108 | 1929.9124 | 0.0016  | 0       | 0.80  | 4.492 | 0.297 | 0   | 1 | 29 | 60 | 2 | 1 | 1 |
| QSV5G6_HALMA | 1 | Hypothetical protein | rmAC0170 | rmAC0170 | 323 | 59.4 | 21 | 222 | 1      | R | YKIEETDASGFVTEWR | T | 2 | 1929.9108 | 1929.9199 | 0.0091  | 0       | 4.70  | 6.055 | 0.59  | 0   | 1 | 27 | 30 | 2 | 1 | 1 |
| QSV5G6_HALMA | 1 | Hypothetical protein | rmAC0170 | rmAC0170 | 323 | 59.4 | 21 | 222 | 1      | R | YKIEETDASGFVTEWR | T | 2 | 1929.9108 | 1929.9132 | 0.0024  | 0       | 1.22  | 6.285 | 0.584 | 0   | 1 | 27 | 30 | 2 | 1 | 1 |
| QSV5G6_HALMA | 1 | Hypothetical protein | rmAC0170 | rmAC0170 | 323 | 59.4 | 21 | 222 | 1      | R | YKIEETDASGFVTEWR | T | 3 | 1929.9108 | 1930.9282 | 1.0173  | -1.0034 | 7.25  | 3.884 | 0.354 | 0   | 1 | 30 | 60 | 2 | 1 | 1 |
| QSV5G6_HALMA | 1 | Hypothetical protein | rmAC0170 | rmAC0170 | 323 | 59.4 | 21 | 222 | 1      | R | YKIEETDASGFVTEWR | T | 3 | 1929.9108 | 1930.9282 | 1.0173  | -1.0034 | 7.25  | 4.215 | 0.36  | 0   | 1 | 31 | 60 | 2 | 1 | 1 |
| QSV5G6_HALMA | 1 | Hypothetical protein | rmAC0170 | rmAC0170 | 323 | 59.4 | 21 | 222 | 1      | R | YKIEETDASGFVTEWR | T | 3 | 1929.9108 | 1929.9093 | -0.0016 | 0       | -0.81 | 4.657 | 0.38  | 0   | 1 | 31 | 60 | 2 | 1 | 1 |
| QSV5G6_HALMA | 1 | Hypothetical protein | rmAC0170 | rmAC0170 | 323 | 59.4 | 21 | 222 | 1      | R | YKIEETDASGFVTEWR | T | 3 | 1929.9108 | 1929.9382 | 0.0273  | 0       | 14.17 | 2.957 | 0.315 | 0.1 | 1 | 25 | 60 | 2 | 1 | 1 |
| QSV5G6_HALMA | 1 | Hypothetical protein | rmAC0170 | rmAC0170 | 323 | 59.4 | 21 | 222 | 1      | R | YKIEETDASGFVTEWR | T | 3 | 1929.9108 | 1929.9131 | 0.0023  | 0       | 1.18  | 5.021 | 0.316 | 0   | 1 | 32 | 60 | 2 | 1 | 1 |
| QSV5G6_HALMA | 1 | Hypothetical protein | rmAC0170 | rmAC0170 | 323 | 59.4 | 21 | 222 | 1      | R | YKIEETDASGFVTEWR | T | 2 | 1929.9108 | 1929.9126 | 0.0017  | 0       | 0.91  | 6.399 | 0.564 | 0   | 1 | 27 | 30 | 2 | 1 | 1 |
| QSV5G6_HALMA | 1 | Hypothetical protein | rmAC0170 | rmAC0170 | 323 | 59.4 | 21 | 222 | 0.9999 | R | YKIEETDASGFVTEWR | T | 3 | 1929.9108 | 1930.8982 | 0.9873  | -1.0034 | -8.29 | 3.761 | 0.289 | 0   | 1 | 25 | 60 | 2 | 1 | 1 |
| QSV5G6_HALMA | 1 | Hypothetical protein | rmAC0170 | rmAC0170 | 323 | 59.4 | 21 | 222 | 0.9999 | R | YKIEETDASGFVTEWR | T | 3 | 1929.9108 | 1930.8982 | 0.9873  | -1.0034 | -8.29 | 3.728 | 0.288 | 0.1 | 1 | 25 | 60 | 2 | 1 | 1 |
| QSV5G6_HALMA | 1 | Hypothetical protein | rmAC0170 | rmAC0170 | 323 | 59.4 | 21 | 222 | 0.9999 | R | YKIEETDASGFVTEWR | T | 3 | 1929.9108 | 1930.9282 | 1.0173  | -1.0034 | 7.25  | 3.558 | 0.281 | 0   | 1 | 27 | 60 | 2 | 1 | 1 |
| QSV5G6_HALMA | 1 | Hypothetical protein | rmAC0170 | rmAC0170 | 323 | 59.4 | 21 | 222 | 0.9999 | R | YKIEETDASGFVTEWR | T | 3 | 1929.9108 | 1929.9382 | 0.0273  | 0       | 14.17 | 3.287 | 0.261 | 0.1 | 1 |    |    |   |   |   |

[illegible]

|              |   |                                          |      |          |     |      |    |     |        |   |                                      |                       |   |           |           |           |         |       |       |       |       |     |    |     |    |   |   |   |
|--------------|---|------------------------------------------|------|----------|-----|------|----|-----|--------|---|--------------------------------------|-----------------------|---|-----------|-----------|-----------|---------|-------|-------|-------|-------|-----|----|-----|----|---|---|---|
| Q5V116_HALMA | 1 | ATP-dependent protease LA (EC 3.4.21.53) | lon  | rmAC1914 | 709 | 56.8 | 40 | 186 | 1      | K | TAPFEDATGAHAGALLGDVVR                | H                     | 2 | 1967.9701 | 1968.9791 | 1.0090    | -1.0034 | 2.86  | 6.034 | 0.543 | 0     | 1   | 28 | 38  | 2  | 0 | 1 |   |
| Q5V116_HALMA | 1 | ATP-dependent protease LA (EC 3.4.21.53) | lon  | rmAC1914 | 709 | 56.8 | 40 | 186 | 1      | K | TAPFEDATGAHAGALLGDVVR                | H                     | 2 | 1967.9701 | 1967.9763 | 0.0062    | 0       | 3.13  | 5.837 | 0.576 | 0     | 1   | 28 | 38  | 2  | 0 | 1 |   |
| Q5V116_HALMA | 1 | ATP-dependent protease LA (EC 3.4.21.53) | lon  | rmAC1914 | 709 | 56.8 | 40 | 186 | 0.9727 | H | K                                    | TAPFEDATGAHAGALLGDVVR | H | 3         | 1967.9701 | 1967.9707 | 0.0005  | 0     | 0.27  | 1.76  | 0.138 | 1.8 | 1  | 35  | 76 | 2 | 0 | 1 |
| Q5V116_HALMA | 1 | ATP-dependent protease LA (EC 3.4.21.53) | lon  | rmAC1914 | 709 | 56.8 | 40 | 186 | 0.9844 | R | TVPGGKGQIVEAHKEEAR                   | K                     | 3 | 2034.0494 | 2034.0478 | -0.0017   | 0       | -0.82 | 1.664 | 0.241 | 0     | 1   | 34 | 72  | 2  | 2 | 1 |   |
| Q5V116_HALMA | 1 | ATP-dependent protease LA (EC 3.4.21.53) | lon  | rmAC1914 | 709 | 56.8 | 40 | 186 | 0.9681 | R | TVPGGKGQIVEAHKEEAR                   | K                     | 3 | 2034.0494 | 2034.0501 | 0.0007    | 0       | 0.35  | 1.425 | 0.246 | 1     | 1   | 30 | 72  | 2  | 2 | 1 |   |
| Q5V116_HALMA | 1 | ATP-dependent protease LA (EC 3.4.21.53) | lon  | rmAC1914 | 709 | 56.8 | 40 | 186 | 0.9668 | R | TVPGGKGQIVEAHKEEAR                   | K                     | 3 | 2034.0494 | 2034.0452 | -0.0042   | 0       | -2.08 | 1.738 | 0.238 | 1.4   | 9   | 25 | 72  | 2  | 2 | 1 |   |
| Q5V116_HALMA | 1 | ATP-dependent protease LA (EC 3.4.21.53) | lon  | rmAC1914 | 709 | 56.8 | 40 | 186 | 1      | R | VNGLAVMGEDSGVILPVMAEVSPSQPGQVIATGQLK | E                     | 3 | 3647.8902 | 3649.8982 | 2.0079    | -2.0067 | 0.34  | 6.832 | 0.523 | 0     | 1   | 36 | 144 | 2  | 0 | 1 |   |
| Q5V116_HALMA | 1 | ATP-dependent protease LA (EC 3.4.21.53) | lon  | rmAC1914 | 709 | 56.8 | 40 | 186 | 1      | R | VNGLAVMGEDSGVILPVMAEVSPSQPGQVIATGQLK | E                     | 3 | 3647.8902 | 3649.8982 | 2.0079    | -2.0067 | 0.34  | 6.127 | 0.367 | 0     | 1   | 26 | 144 | 2  | 0 | 1 |   |
| QSUZA8_HALMA | 1 | Heterodisulfide reductase                | hdrD | rmAC2605 | 693 | 40.3 | 23 | 147 | 0.9999 | R | RLTEAGEMDEHVQDAMMNVFQHGNTFGDPER      | A                     | 4 | 3592.5507 | 3594.5709 | 2.0202    | -2.0067 | 3.75  | 3.601 | 0.285 | 0.1   | 3   | 37 | 180 | 2  | 0 | 1 |   |
| QSUZA8_HALMA | 1 | Heterodisulfide reductase                | hdrD | rmAC2605 | 693 | 40.3 | 23 | 147 | 1      | K | AGVRLPGVPSDASPEEIGPSDIDDFSWK         | Q                     | 3 | 2940.4141 | 2940.4180 | 0.0039    | 0       | 1.31  | 6.676 | 0.543 | 0     | 1   | 45 | 108 | 2  | 1 | 1 |   |
| QSUZA8_HALMA | 1 | Heterodisulfide reductase                | hdrD | rmAC2605 | 693 | 40.3 | 23 | 147 | 1      | K | AGVRLPGVPSDASPEEIGPSDIDDFSWK         | Q                     | 3 | 2940.4141 | 2940.4185 | 0.0044    | 0       | 1.50  | 6.588 | 0.501 | 0     | 1   | 45 | 108 | 2  | 1 | 1 |   |
| QSUZA8_HALMA | 1 | Heterodisulfide reductase                | hdrD | rmAC2605 | 693 | 40.3 | 23 | 147 | 1      | R | ARPDWTEDLDFEYPPDAR                   | D                     | 2 | 2030.9334 | 2030.9424 | 0.0089    | 0       | 4.40  | 4.905 | 0.42  | 0     | 1   | 26 | 32  | 2  | 0 | 1 |   |
| QSUZA8_HALMA | 1 | Heterodisulfide reductase                | hdrD | rmAC2605 | 693 | 40.3 | 23 | 147 | 1      | R | ARPDWTEDLDFEYPPDAR                   | D                     | 2 | 2030.9334 | 2030.9342 | 0.0008    | 0       | 0.37  | 4.812 | 0.417 | 0     | 1   | 23 | 32  | 2  | 0 | 1 |   |
| QSUZA8_HALMA | 1 | Heterodisulfide reductase                | hdrD | rmAC2605 | 693 | 40.3 | 23 | 147 | 1      | R | ARPDWTEDLDFEYPPDAR                   | D                     | 3 | 2030.9334 | 2030.9350 | 0.0015    | 0       | 0.76  | 4.623 | 0.301 | 0     | 1   | 31 | 64  | 2  | 0 | 1 |   |
| QSUZA8_HALMA | 1 | Heterodisulfide reductase                | hdrD | rmAC2605 | 693 | 40.3 | 23 | 147 | 1      | R | ARPDWTEDLDFEYPPDAR                   | D                     | 3 | 2030.9334 | 2030.9379 | 0.0045    | 0       | 2.20  | 4.091 | 0.296 | 0     | 2   | 31 | 64  | 2  | 0 | 1 |   |
| QSUZA8_HALMA | 1 | Heterodisulfide reductase                | hdrD | rmAC2605 | 693 | 40.3 | 23 | 147 | 0.9990 | R | ARPDWTEDLDFEYPPDAR                   | D                     | 3 | 2030.9334 | 2031.9382 | 1.0047    | -1.0034 | 0.69  | 3.609 | 0.164 | 0     | 2   | 28 | 64  | 2  | 0 | 1 |   |
| QSUZA8_HALMA | 1 | Heterodisulfide reductase                | hdrD | rmAC2605 | 693 | 40.  |    |     |        |   |                                      |                       |   |           |           |           |         |       |       |       |       |     |    |     |    |   |   |   |

|              |   |                           |      |          |     |      |    |     |        |   |                           |   |   |           |           |         |         |       |       |       |     |     |    |    |   |   |   |
|--------------|---|---------------------------|------|----------|-----|------|----|-----|--------|---|---------------------------|---|---|-----------|-----------|---------|---------|-------|-------|-------|-----|-----|----|----|---|---|---|
| QSUZA8_HALMA | 1 | Heterodisulfide reductase | hdrD | rmAC2605 | 693 | 40.3 | 23 | 147 | 1      | R | TVAAQQLASNRK              | K | 2 | 1213.6779 | 1213.6772 | -0.0007 | 0       | -0.58 | 3.529 | 0.5   | 0   | 1   | 19 | 22 | 2 | 0 | 1 |
| QSUZA8_HALMA | 1 | Heterodisulfide reductase | hdrD | rmAC2605 | 693 | 40.3 | 23 | 147 | 1      | R | TVAAQQLASNRK              | Q | 2 | 1341.7728 | 1341.7728 | 0.0000  | 0       | -0.02 | 3.809 | 0.403 | 0   | 1   | 20 | 24 | 2 | 0 | 1 |
| QSUZA8_HALMA | 1 | Heterodisulfide reductase | hdrD | rmAC2605 | 693 | 40.3 | 23 | 147 | 1      | R | TVAAQQLASNRK              | Q | 2 | 1341.7728 | 1341.7654 | -0.0074 | 0       | -5.50 | 3.316 | 0.322 | 0   | 1   | 18 | 24 | 2 | 0 | 1 |
| QSUZA8_HALMA | 1 | Heterodisulfide reductase | hdrD | rmAC2605 | 693 | 40.3 | 23 | 147 | 0.9941 | R | TVAAQQLASNRK              | Q | 2 | 1341.7728 | 1341.7735 | 0.0007  | 0       | 0.53  | 3.934 | 0.405 | 0   | 1   | 19 | 24 | 2 | 0 | 1 |
| QSUZA8_HALMA | 1 | Heterodisulfide reductase | hdrD | rmAC2605 | 693 | 40.3 | 23 | 147 | 0.9932 | R | TVAAQQLASNRK              | Q | 3 | 1341.7728 | 1341.7743 | 0.0015  | 0       | 1.11  | 2.053 | 0.184 | 0.3 | 5   | 23 | 48 | 2 | 0 | 1 |
| QSUZA8_HALMA | 1 | Heterodisulfide reductase | hdrD | rmAC2605 | 693 | 40.3 | 23 | 147 | 0.9263 | R | TVAAQQLASNRK              | Q | 3 | 1341.7728 | 1341.7738 | 0.0009  | 0       | 0.70  | 1.863 | 0.186 | 1.8 | 2   | 25 | 48 | 2 | 0 | 1 |
| QSUZA8_HALMA | 1 | Heterodisulfide reductase | hdrD | rmAC2605 | 693 | 40.3 | 23 | 147 | 1      | R | VFEAADVDYGLYEAQETDGNDRV   | R | 2 | 2688.2191 | 2688.2132 | -0.0059 | 0       | -2.19 | 5.611 | 0.461 | 0   | 1   | 25 | 46 | 2 | 0 | 1 |
| QSUZA8_HALMA | 1 | Heterodisulfide reductase | hdrD | rmAC2605 | 693 | 40.3 | 23 | 147 | 1      | R | VFEAADVDYGLYEAQETDGNDRV   | R | 3 | 2688.2191 | 2690.2282 | 2.0090  | -2.0067 | 0.87  | 4.88  | 0.418 | 0   | 1   | 27 | 92 | 2 | 0 | 1 |
| QSUZA8_HALMA | 1 | Heterodisulfide reductase | hdrD | rmAC2605 | 693 | 40.3 | 23 | 147 | 1      | R | VFEAADVDYGLYEAQETDGNDRV   | R | 3 | 2688.2191 | 2690.2313 | 2.0122  | -2.0067 | 2.03  | 4.48  | 0.416 | 0   | 1   | 27 | 92 | 2 | 0 | 1 |
| QSUZA8_HALMA | 1 | Heterodisulfide reductase | hdrD | rmAC2605 | 693 | 40.3 | 23 | 147 | 1      | R | VFEAADVDYGLYEAQETDGNDRV   | R | 2 | 2688.2191 | 2688.2364 | 0.0173  | 0       | 6.44  | 5.23  | 0.454 | 0   | 1   | 25 | 46 | 2 | 0 | 1 |
| QSUZA8_HALMA | 1 | Heterodisulfide reductase | hdrD | rmAC2605 | 693 | 40.3 | 23 | 147 | 1      | R | VFEAADVDYGLYEAQETDGNDRV   | R | 3 | 2688.2191 | 2690.2282 | 2.0090  | -2.0067 | 0.87  | 5.246 | 0.413 | 0   | 1   | 30 | 92 | 2 | 0 | 1 |
| QSUZA8_HALMA | 1 | Heterodisulfide reductase | hdrD | rmAC2605 | 693 | 40.3 | 23 | 147 | 1      | R | VFEAADVDYGLYEAQETDGNDRV   | R | 3 | 2688.2191 | 2689.2207 | 1.0016  | -1.0034 | -0.65 | 4.298 | 0.343 | 0   | 1   | 30 | 92 | 2 | 0 | 1 |
| QSUZA8_HALMA | 1 | Heterodisulfide reductase | hdrD | rmAC2605 | 693 | 40.3 | 23 | 147 | 0.9998 | R | VFEAADVDYGLYEAQETDGNDRV   | R | 3 | 2688.2191 | 2690.2212 | 2.0021  | -2.0067 | -1.72 | 3.568 | 0.235 | 0.1 | 1   | 27 | 92 | 2 | 0 | 1 |
| QSUZA8_HALMA | 1 | Heterodisulfide reductase | hdrD | rmAC2605 | 693 | 40.3 | 23 | 147 | 0.9810 | R | VFEAADVDYGLYEAQETDGNDRV   | R | 3 | 2688.2191 | 2689.2082 | 0.9890  | -1.0034 | -5.32 | 3.048 | 0.106 | 0.9 | 2   | 27 | 92 | 2 | 0 | 1 |
| QSUZA8_HALMA | 1 | Heterodisulfide reductase | hdrD | rmAC2605 | 693 | 40.3 | 23 | 147 | 0.9749 | R | VFEAADVDYGLYEAQETDGNDRV   | R | 3 | 2688.2191 | 2689.4182 | 1.1990  | -1.0034 | 72.80 | 3.641 | 0.15  | 1   | 369 | 21 | 92 | 2 | 0 | 1 |
| QSUZA8_HALMA | 1 | Heterodisulfide reductase | hdrD | rmAC2605 | 693 | 40.3 | 23 | 147 | 0.9317 | R | VFEAADVDYGLYEAQETDGNDRV   | R | 3 | 2688.2191 | 2689.3882 | 1.1690  | -1.0034 | 61.64 | 3.229 | 0.073 | 0.6 | 18  | 23 | 92 | 2 | 0 | 1 |
| QSUZA8_HALMA | 1 | Heterodisulfide reductase | hdrD | rmAC2605 | 693 | 40.3 | 23 | 147 | 1      | R | VFEAADVDYGLYEAQETDGNDRVRR | V | 3 | 2844.3202 | 2844.3255 | 0.0053  | 0       | 1.86  | 3     |       |     |     |    |    |   |   |   |



[illegible]







|              |   |                                   |      |          |     |      |    |    |   |   |                            |   |   |           |           |        |         |       |       |       |   |   |    |     |   |   |   |
|--------------|---|-----------------------------------|------|----------|-----|------|----|----|---|---|----------------------------|---|---|-----------|-----------|--------|---------|-------|-------|-------|---|---|----|-----|---|---|---|
| Q5V0G0_HALMA | 1 | Phosphate ABC transporter binding | yggG | rmAC2149 | 384 | 38.8 | 14 | 79 | 1 | K | EAAVINMILSDFGQDTFVAPNNYFK  | L | 3 | 2803.3527 | 2804.3782 | 1.0254 | -1.0034 | 7.88  | 3.735 | 0.403 | 0 | 1 | 28 | 96  | 2 | 0 | 1 |
| Q5V0G0_HALMA | 1 | Phosphate ABC transporter binding | yggG | rmAC2149 | 384 | 38.8 | 14 | 79 | 1 | K | EAAVINMILSDFGQDTFVAPNNYFK  | L | 2 | 2803.3527 | 2803.3602 | 0.0075 | 0       | 2.67  | 4.494 | 0.353 | 0 | 1 | 24 | 48  | 2 | 0 | 1 |
| Q5V0G0_HALMA | 1 | Phosphate ABC transporter binding | yggG | rmAC2149 | 384 | 38.8 | 14 | 79 | 1 | K | EAAVINMILSDFGQDTFVAPNNYFK  | L | 2 | 2803.3527 | 2803.3551 | 0.0024 | 0       | 0.84  | 4.822 | 0.658 | 0 | 1 | 26 | 48  | 2 | 0 | 1 |
| Q5V0G0_HALMA | 1 | Phosphate ABC transporter binding | yggG | rmAC2149 | 384 | 38.8 | 14 | 79 | 1 | K | EAAVINMILSDFGQDTFVAPNNYFK  | L | 2 | 2803.3527 | 2803.3558 | 0.0031 | 0       | 1.10  | 4.151 | 0.328 | 0 | 1 | 24 | 48  | 2 | 0 | 1 |
| Q5V0G0_HALMA | 1 | Phosphate ABC transporter binding | yggG | rmAC2149 | 384 | 38.8 | 14 | 79 | 1 | K | EAAVINMILSDFGQDTFVAPNNYFK  | L | 2 | 2803.3527 | 2804.3482 | 0.9954 | -1.0034 | -2.82 | 4.33  | 0.333 | 0 | 1 | 29 | 96  | 2 | 0 | 1 |
| Q5V0G0_HALMA | 1 | Phosphate ABC transporter binding | yggG | rmAC2149 | 384 | 38.8 | 14 | 79 | 1 | K | EAAVINMILSDFGQDTFVAPNNYFK  | L | 2 | 2803.3527 | 2803.3543 | 0.0016 | 0       | 0.58  | 4.897 | 0.625 | 0 | 1 | 26 | 48  | 2 | 0 | 1 |
| Q5V0G0_HALMA | 1 | Phosphate ABC transporter binding | yggG | rmAC2149 | 384 | 38.8 | 14 | 79 | 1 | K | EAAVINMILSDFGQDTFVAPNNYFK  | L | 2 | 2803.3527 | 2803.3578 | 0.0050 | 0       | 1.80  | 4.736 | 0.631 | 0 | 1 | 26 | 48  | 2 | 0 | 1 |
| Q5V0G0_HALMA | 1 | Phosphate ABC transporter binding | yggG | rmAC2149 | 384 | 38.8 | 14 | 79 | 1 | K | GELTNWSELGGPDR             | E | 2 | 1529.7110 | 1529.7140 | 0.0029 | 0       | 1.92  | 4.197 | 0.471 | 0 | 1 | 22 | 26  | 2 | 0 | 1 |
| Q5V0G0_HALMA | 1 | Phosphate ABC transporter binding | yggG | rmAC2149 | 384 | 38.8 | 14 | 79 | 1 | K | GELTNWSELGGPDR             | E | 2 | 1529.7110 | 1529.7146 | 0.0035 | 0       | 2.32  | 4.344 | 0.476 | 0 | 1 | 21 | 26  | 2 | 0 | 1 |
| Q5V0G0_HALMA | 1 | Phosphate ABC transporter binding | yggG | rmAC2149 | 384 | 38.8 | 14 | 79 | 1 | K | GELTNWSELGGPDREIQVLGR      | V | 2 | 2325.1713 | 2325.1727 | 0.0014 | 0       | 0.59  | 4.505 | 0.331 | 0 | 1 | 17 | 40  | 2 | 1 | 1 |
| Q5V0G0_HALMA | 1 | Phosphate ABC transporter binding | yggG | rmAC2149 | 384 | 38.8 | 14 | 79 | 1 | K | GELTNWSELGGPDREIQVLGR      | V | 2 | 2325.1713 | 2325.1725 | 0.0011 | 0       | 0.49  | 4.737 | 0.362 | 0 | 2 | 15 | 40  | 2 | 1 | 1 |
| Q5V0G0_HALMA | 1 | Phosphate ABC transporter binding | yggG | rmAC2149 | 384 | 38.8 | 14 | 79 | 1 | K | GELTNWSELGGPDREIQVLGR      | V | 2 | 2325.1713 | 2325.1720 | 0.0006 | 0       | 0.28  | 4.716 | 0.405 | 0 | 1 | 16 | 40  | 2 | 1 | 1 |
| Q5V0G0_HALMA | 1 | Phosphate ABC transporter binding | yggG | rmAC2149 | 384 | 38.8 | 14 | 79 | 1 | K | GELTNWSELGGPDREIQVLGR      | V | 3 | 2325.1713 | 2325.1882 | 0.0168 | 0       | 7.25  | 4.183 | 0.381 | 0 | 1 | 34 | 80  | 2 | 1 | 1 |
| Q5V0G0_HALMA | 1 | Phosphate ABC transporter binding | yggG | rmAC2149 | 384 | 38.8 | 14 | 79 | 1 | K | GELTNWSELGGPDREIQVLGR      | V | 3 | 2325.1713 | 2325.1783 | 0.0070 | 0       | 3.00  | 4.196 | 0.393 | 0 | 1 | 34 | 80  | 2 | 1 | 1 |
| Q5V0G0_HALMA | 1 | Phosphate ABC transporter binding | yggG | rmAC2149 | 384 | 38.8 | 14 | 79 | 1 | K | GELTNWSELGGPDREIQVLGR      | V | 3 | 2325.1713 | 2325.1882 | 0.0168 | 0       | 7.25  | 3.806 | 0.347 | 0 | 1 | 34 | 80  | 2 | 1 | 1 |
| Q5V0G0_HALMA | 1 | Phosphate ABC transporter binding | yggG | rmAC2149 | 384 | 38.8 | 14 | 79 | 1 | K | GELTNWSELGGPDREIQVLGR      | V | 3 | 2325.1713 | 2325.1882 | 0.0168 | 0       | 7.25  | 4.25  | 0.372 | 0 | 1 | 33 | 80  | 2 | 1 | 1 |
| Q5V0G0_HALMA | 1 | Phosphate ABC transporter binding | yggG | rmAC2149 | 384 | 38.8 | 14 | 79 | 1 | K | KEAAVINMILSDFGQDTFVAPNNYFK | L | 3 | 2931.4477 | 2931.4497 | 0.0019 | 0       | 0.66  | 4.883 | 0.529 | 0 | 1 | 32 | 100 | 2 | 0 | 1 |
| Q5V0G0_HALMA | 1 |                                   |      |          |     |      |    |    |   |   |                            |   |   |           |           |        |         |       |       |       |   |   |    |     |   |   |   |







[illegible]

|              |   |                                       |      |          |     |      |    |    |        |   |              |   |   |           |           |         |         |       |       |       |     |    |    |     |   |   |   |
|--------------|---|---------------------------------------|------|----------|-----|------|----|----|--------|---|--------------|---|---|-----------|-----------|---------|---------|-------|-------|-------|-----|----|----|-----|---|---|---|
| QSV093_HALMA | 1 | Dipeptide ABC transporter ATP-binding | dppF | rmAC2227 | 890 | 44.4 | 32 | 73 | 0.9990 | R | FGALGTVTR    | L | 2 | 920.5079  | 920.5044  | -0.0025 | 0       | -2.69 | 2.434 | 0.147 | 0.1 | 1  | 16 | 16  | 2 | 0 | 1 |
| QSV093_HALMA | 1 | Dipeptide ABC transporter ATP-binding | dppF | rmAC2227 | 890 | 44.4 | 32 | 73 | 0.9940 | R | FGALGTVTR    | L | 2 | 920.5079  | 920.5100  | 0.0021  | 0       | 2.24  | 1.973 | 0.138 | 1.3 | 1  | 14 | 16  | 2 | 0 | 1 |
| QSV093_HALMA | 1 | Dipeptide ABC transporter ATP-binding | dppF | rmAC2227 | 890 | 44.4 | 32 | 73 | 1      | R | GGDMGMIFQDPM | L | 3 | 3163.4988 | 3163.4892 | -0.0097 | 0       | -3.06 | 4.994 | 0.515 | 0   | 1  | 42 | 116 | 2 | 0 | 1 |
| QSV093_HALMA | 1 | Dipeptide ABC transporter ATP-binding | dppF | rmAC2227 | 890 | 44.4 | 32 | 73 | 1      | R | GGDMGMIFQDPM | L | 3 | 3163.4988 | 3163.5020 | 0.0032  | 0       | 1.00  | 4.007 | 0.337 | 0.1 | 6  | 25 | 116 | 2 | 0 | 1 |
| QSV093_HALMA | 1 | Dipeptide ABC transporter ATP-binding | dppF | rmAC2227 | 890 | 44.4 | 32 | 73 | 0.9997 | R | GGDMGMIFQDPM | L | 3 | 3163.4988 | 3163.4987 | -0.0001 | 0       | -0.05 | 3.611 | 0.173 | 0.3 | 1  | 33 | 116 | 2 | 0 | 1 |
| QSV093_HALMA | 1 | Dipeptide ABC transporter ATP-binding | dppF | rmAC2227 | 890 | 44.4 | 32 | 73 | 0.9943 | R | GGDMGMIFQDPM | L | 3 | 3179.4988 | 3179.5043 | 0.0055  | 0       | 1.72  | 4.745 | 0.389 | 0   | 1  | 31 | 116 | 2 | 0 | 1 |
| QSV093_HALMA | 1 | Dipeptide ABC transporter ATP-binding | dppF | rmAC2227 | 890 | 44.4 | 32 | 73 | 1      | R | LLEPTDGKVV   | L | 3 | 2273.1791 | 2273.1855 | 0.0064  | 0       | 2.81  | 3.646 | 0.389 | 0   | 3  | 27 | 80  | 2 | 1 | 1 |
| QSV093_HALMA | 1 | Dipeptide ABC transporter ATP-binding | dppF | rmAC2227 | 890 | 44.4 | 32 | 73 | 1      | R | LLEPTDGKVV   | E | 4 | 2686.4177 | 2686.4196 | 0.0019  | 0       | 0.71  | 3.825 | 0.364 | 0   | 1  | 50 | 144 | 2 | 2 | 1 |
| QSV093_HALMA | 1 | Dipeptide ABC transporter ATP-binding | dppF | rmAC2227 | 890 | 44.4 | 32 | 73 | 1      | R | LLEPTDGKVV   | E | 3 | 2686.4177 | 2688.4282 | 2.0104  | -2.0067 | 1.39  | 5.007 | 0.523 | 0   | 1  | 36 | 96  | 2 | 2 | 1 |
| QSV093_HALMA | 1 | Dipeptide ABC transporter ATP-binding | dppF | rmAC2227 | 890 | 44.4 | 32 | 73 | 0.9697 | R | LPASLETT     | Q | 3 | 1700.8945 | 1700.8882 | -0.0064 | 0       | -3.74 | 2.337 | 0.181 | 0.3 | 23 | 21 | 60  | 2 | 1 | 1 |
| QSV093_HALMA | 1 | Dipeptide ABC transporter ATP-binding | dppF | rmAC2227 | 890 | 44.4 | 32 | 73 | 1      | - | MRDLLT       | T | 3 | 1331.7231 | 1331.7230 | -0.0001 | 0       | -0.08 | 3.893 | 0.218 | 0.2 | 1  | 29 | 40  | 2 | 1 | 1 |
| QSV093_HALMA | 1 | Dipeptide ABC transporter ATP-binding | dppF | rmAC2227 | 890 | 44.4 | 32 | 73 | 0.9963 | - | MRDLLT       | T | 3 | 1331.7231 | 1331.7257 | 0.0025  | 0       | 1.91  | 3.093 | 0.126 | 1   | 2  | 23 | 40  | 2 | 1 | 1 |
| QSV093_HALMA | 1 | Dipeptide ABC transporter ATP-binding | dppF | rmAC2227 | 890 | 44.4 | 32 | 73 | 1      | R | MTVGQTIMEPL  | R | 3 | 2739.3207 | 2739.3409 | 0.0202  | 0       | 7.37  | 4.282 | 0.345 | 0   | 1  | 29 | 96  | 2 | 1 | 1 |
| QSV093_HALMA | 1 | Dipeptide ABC transporter ATP-binding | dppF | rmAC2227 | 890 | 44.4 | 32 | 73 | 1      | R | MTVGQTIMEPL  | E | 5 | 2895.4219 | 2895.4205 | -0.0015 | 0       | -0.50 | 2.719 | 0.348 | 0.1 | 1  | 55 | 200 | 2 | 1 | 1 |
| QSV093_HALMA | 1 | Dipeptide ABC transporter ATP-binding | dppF | rmAC2227 | 890 | 44.4 | 32 | 73 | 0.9999 | R | MTVGQTIMEPL  | E | 5 | 2911.4219 | 2911.4205 | -0.0014 | 0       | -0.48 | 2.636 | 0.275 | 0.6 | 2  | 51 | 200 | 2 | 1 | 1 |
| QSV093_HALMA | 1 | Dipeptide ABC transporter ATP-binding | dppF | rmAC2227 | 890 | 44.4 | 32 | 73 | 0.9997 | R | MTVGQTIMEPL  | E | 4 | 2911.4219 | 2911.4235 | 0.0016  | 0       | 0.55  | 2.555 | 0.183 | 2.2 | 1  | 37 | 150 | 2 | 1 | 1 |
| QSV093_HALMA | 1 | Dipeptide ABC transporter ATP-binding | dppF | rmAC2227 | 890 | 44.4 | 32 | 73 | 0.9995 | R | MTVGQTIMEPL  | E | 5 | 2895.4219 | 2895.4189 | -0.0030 | 0       | -1.03 | 2.422 | 0.164 | 0.5 | 1  | 55 | 200 | 2 | 1 | 1 |
| QSV093_HALMA | 1 | Dipeptide ABC transporter ATP-binding | dppF | rmAC2227 | 890 | 44.4 | 32 |    |        |   |              |   |   |           |           |         |         |       |       |       |     |    |    |     |   |   |   |











|              |   |                                               |         |         |     |      |    |    |        |   |                              |   |   |           |           |         |         |       |       |       |     |     |    |     |   |   |   |
|--------------|---|-----------------------------------------------|---------|---------|-----|------|----|----|--------|---|------------------------------|---|---|-----------|-----------|---------|---------|-------|-------|-------|-----|-----|----|-----|---|---|---|
| Q5UWG3_HALMA | 1 | Putative extracellular ligand binding protein | rmB0207 | rmB0207 | 414 | 51.4 | 16 | 60 | 0.9460 | R | AAAGEDDDGTAIRDQMR            | A | 2 | 1675.7584 | 1675.7611 | 0.0027  | 0       | 1.59  | 2.394 | 0.113 | 1.3 | 1   | 16 | 30  | 2 | 1 | 1 |
| Q5UWG3_HALMA | 1 | Putative extracellular ligand binding protein | rmB0207 | rmB0207 | 414 | 51.4 | 16 | 60 | 1      | R | ADDLPGNVGHDMTNVR             | G | 2 | 1709.7791 | 1709.7779 | -0.0012 | 0       | -0.70 | 3.706 | 0.519 | 0   | 1   | 18 | 30  | 2 | 0 | 1 |
| Q5UWG3_HALMA | 1 | Putative extracellular ligand binding protein | rmB0207 | rmB0207 | 414 | 51.4 | 16 | 60 | 0.9206 | R | ADDLPGNVGHDMTNVR             | G | 3 | 1709.7791 | 1709.7806 | 0.0015  | 0       | 0.86  | 2.172 | 0.031 | 0.7 | 2   | 24 | 60  | 2 | 0 | 1 |
| Q5UWG3_HALMA | 1 | Putative extracellular ligand binding protein | rmB0207 | rmB0207 | 414 | 51.4 | 16 | 60 | 0.9087 | R | ADDLPGNVGHDMTNVR             | G | 3 | 1709.7791 | 1709.7801 | 0.0009  | 0       | 0.54  | 1.808 | 0.074 | 2.8 | 3   | 24 | 60  | 2 | 0 | 1 |
| Q5UWG3_HALMA | 1 | Putative extracellular ligand binding protein | rmB0207 | rmB0207 | 414 | 51.4 | 16 | 60 | 1      | R | ADMDDLVPDGLRADDLPGNVGHDMTNVR | G | 3 | 3021.4335 | 3022.4482 | 1.0146  | -1.0034 | 3.74  | 4.063 | 0.346 | 0   | 1   | 28 | 108 | 2 | 1 | 1 |
| Q5UWG3_HALMA | 1 | Putative extracellular ligand binding protein | rmB0207 | rmB0207 | 414 | 51.4 | 16 | 60 | 0.9999 | R | ADMDDLVPDGLRADDLPGNVGHDMTNVR | G | 4 | 3005.4335 | 3006.4509 | 1.0174  | -1.0034 | 4.67  | 2.776 | 0.275 | 0   | 1   | 46 | 162 | 2 | 1 | 1 |
| Q5UWG3_HALMA | 1 | Putative extracellular ligand binding protein | rmB0207 | rmB0207 | 414 | 51.4 | 16 | 60 | 0.9791 | R | ADMDDLVPDGLRADDLPGNVGHDMTNVR | G | 4 | 3021.4335 | 3021.4333 | -0.0002 | 0       | -0.08 | 2.615 | 0.181 | 0.8 | 104 | 29 | 162 | 2 | 1 | 1 |
| Q5UWG3_HALMA | 1 | Putative extracellular ligand binding protein | rmB0207 | rmB0207 | 414 | 51.4 | 16 | 60 | 0.9656 | R | ADMDDLVPDGLRADDLPGNVGHDMTNVR | G | 4 | 3021.4335 | 3021.4348 | 0.0012  | 0       | 0.41  | 2.199 | 0.144 | 1.9 | 61  | 32 | 162 | 2 | 1 | 1 |
| Q5UWG3_HALMA | 1 | Putative extracellular ligand binding protein | rmB0207 | rmB0207 | 414 | 51.4 | 16 | 60 | 1      | R | DADNGFSVDTQFENTETKPSR        | G | 2 | 2357.0407 | 2359.0301 | 1.9894  | -2.0067 | -7.34 | 3.894 | 0.428 | 0   | 1   | 19 | 40  | 2 | 0 | 1 |
| Q5UWG3_HALMA | 1 | Putative extracellular ligand binding protein | rmB0207 | rmB0207 | 414 | 51.4 | 16 | 60 | 1      | R | DADNGFSVDTQFENTETKPSR        | G | 3 | 2357.0407 | 2357.0447 | 0.0040  | 0       | 1.69  | 3.797 | 0.267 | 0   | 1   | 28 | 80  | 2 | 0 | 1 |
| Q5UWG3_HALMA | 1 | Putative extracellular ligand binding protein | rmB0207 | rmB0207 | 414 | 51.4 | 16 | 60 | 1      | R | DADNGFSVDTQFENTETKPSR        | G | 3 | 2357.0407 | 2357.0416 | 0.0009  | 0       | 0.37  | 3.613 | 0.344 | 0   | 1   | 28 | 80  | 2 | 0 | 1 |
| Q5UWG3_HALMA | 1 | Putative extracellular ligand binding protein | rmB0207 | rmB0207 | 414 | 51.4 | 16 | 60 | 1      | R | DADNGFSVDTQFENTETKPSR        | G | 2 | 2357.0407 | 2359.0384 | 1.9977  | -2.0067 | -3.82 | 4.143 | 0.318 | 0   | 1   | 20 | 40  | 2 | 0 | 1 |
| Q5UWG3_HALMA | 1 | Putative extracellular ligand binding protein | rmB0207 | rmB0207 | 414 | 51.4 | 16 | 60 | 1      | R | DADNGFSVDTQFENTETKPSR        | G | 2 | 2357.0407 | 2357.0416 | 0.0009  | 0       | 0.37  | 4.671 | 0.512 | 0   | 1   | 21 | 40  | 2 | 0 | 1 |
| Q5UWG3_HALMA | 1 | Putative extracellular ligand binding protein | rmB0207 | rmB0207 | 414 | 51.4 | 16 | 60 | 1      | R | DADNGFSVDTQFENTETKPSR        | G | 2 | 2357.0407 | 2357.0479 | 0.0072  | 0       | 3.06  | 5.105 | 0.438 | 0   | 1   | 20 | 40  | 2 | 0 | 1 |
| Q5UWG3_HALMA | 1 | Putative extracellular ligand binding protein | rmB0207 | rmB0207 | 414 | 51.4 | 16 | 60 | 1      | R | DADNGFSVDTQFENTETKPSR        | G | 3 | 2357.0407 | 2359.0282 | 1.9874  | -2.0067 | -8.17 | 3.368 | 0.339 | 0.1 | 1   | 23 | 80  | 2 | 0 | 1 |
| Q5UWG3_HALMA | 1 | Putative extracellular ligand binding protein | rmB0207 | rmB0207 | 414 | 51.4 | 16 | 60 | 0.9997 | R | DADNGFSVDTQFENTETKPSR        | G | 3 | 2357.0407 | 2359.0282 | 1.9874  | -2.0067 | -8.17 | 3.327 | 0.244 | 0.1 | 3   | 25 | 80  | 2 | 0 | 1 |
| Q5UWG3_HALMA | 1 | Putative extracellular ligand binding protein | rmB0207 | rmB0207 | 414 | 51.4 | 16 | 60 | 0.999  |   |                              |   |   |           |           |         |         |       |       |       |     |     |    |     |   |   |   |

|              |   |                                            |       |          |     |    |   |    |        |   |                     |   |   |           |           |         |         |         |       |       |     |    |    |    |   |   |   |
|--------------|---|--------------------------------------------|-------|----------|-----|----|---|----|--------|---|---------------------|---|---|-----------|-----------|---------|---------|---------|-------|-------|-----|----|----|----|---|---|---|
| QSV224_HALMA | 1 | Phosphate ABC transporter permease protein | pstA2 | rmAC1507 | 566 | 15 | 5 | 59 | 1      | R | AIGETAPLLMIGAAAASVR | L | 3 | 1739.9604 | 1740.9642 | 1.0038  | -1.0034 | 0.24    | 4.418 | 0.476 | 0   | 1  | 33 | 68 | 2 | 0 | 1 |
| QSV224_HALMA | 1 | Phosphate ABC transporter permease protein | pstA2 | rmAC1507 | 566 | 15 | 5 | 59 | 1      | R | AIGETAPLLMIGAAAASVR | L | 2 | 1739.9604 | 1740.9654 | 1.0050  | -1.0034 | 0.96    | 5.589 | 0.484 | 0   | 1  | 22 | 34 | 2 | 0 | 1 |
| QSV224_HALMA | 1 | Phosphate ABC transporter permease protein | pstA2 | rmAC1507 | 566 | 15 | 5 | 59 | 1      | R | AIGETAPLLMIGAAAASVR | L | 3 | 1739.9604 | 1740.9654 | 1.0050  | -1.0034 | 0.96    | 5.589 | 0.545 | 0   | 1  | 24 | 34 | 2 | 0 | 1 |
| QSV224_HALMA | 1 | Phosphate ABC transporter permease protein | pstA2 | rmAC1507 | 566 | 15 | 5 | 59 | 1      | R | AIGETAPLLMIGAAAASVR | L | 3 | 1739.9604 | 1739.9635 | 0.0031  | 0       | 1.78    | 5.416 | 0.474 | 0   | 1  | 35 | 68 | 2 | 0 | 1 |
| QSV224_HALMA | 1 | Phosphate ABC transporter permease protein | pstA2 | rmAC1507 | 566 | 15 | 5 | 59 | 1      | R | AIGETAPLLMIGAAAASVR | L | 3 | 1739.9604 | 1739.9644 | 0.0040  | 0       | 2.31    | 3.686 | 0.333 | 0   | 1  | 30 | 68 | 2 | 0 | 1 |
| QSV224_HALMA | 1 | Phosphate ABC transporter permease protein | pstA2 | rmAC1507 | 566 | 15 | 5 | 59 | 1      | R | AIGETAPLLMIGAAAASVR | L | 3 | 1739.9604 | 1739.9630 | 0.0025  | 0       | 1.46    | 5.055 | 0.455 | 0   | 1  | 39 | 68 | 2 | 0 | 1 |
| QSV224_HALMA | 1 | Phosphate ABC transporter permease protein | pstA2 | rmAC1507 | 566 | 15 | 5 | 59 | 1      | R | AIGETAPLLMIGAAAASVR | L | 3 | 1739.9604 | 1739.9622 | 0.0018  | 0       | 1.04    | 4.227 | 0.4   | 0   | 1  | 33 | 68 | 2 | 0 | 1 |
| QSV224_HALMA | 1 | Phosphate ABC transporter permease protein | pstA2 | rmAC1507 | 566 | 15 | 5 | 59 | 1      | R | AIGETAPLLMIGAAAASVR | L | 3 | 1739.9604 | 1739.9586 | -0.0018 | 0       | -1.06   | 3.556 | 0.408 | 0   | 1  | 28 | 68 | 2 | 0 | 1 |
| QSV224_HALMA | 1 | Phosphate ABC transporter permease protein | pstA2 | rmAC1507 | 566 | 15 | 5 | 59 | 1      | R | AIGETAPLLMIGAAAASVR | L | 2 | 1739.9604 | 1739.9635 | 0.0031  | 0       | 1.75    | 5.551 | 0.486 | 0   | 1  | 23 | 34 | 2 | 0 | 1 |
| QSV224_HALMA | 1 | Phosphate ABC transporter permease protein | pstA2 | rmAC1507 | 566 | 15 | 5 | 59 | 1      | R | AIGETAPLLMIGAAAASVR | L | 3 | 1739.9604 | 1739.9599 | -0.0006 | 0       | -0.32   | 3.885 | 0.403 | 0   | 1  | 34 | 68 | 2 | 0 | 1 |
| QSV224_HALMA | 1 | Phosphate ABC transporter permease protein | pstA2 | rmAC1507 | 566 | 15 | 5 | 59 | 1      | R | AIGETAPLLMIGAAAASVR | L | 3 | 1739.9604 | 1740.9682 | 1.0077  | -1.0034 | 2.53    | 4.608 | 0.425 | 0   | 1  | 33 | 68 | 2 | 0 | 1 |
| QSV224_HALMA | 1 | Phosphate ABC transporter permease protein | pstA2 | rmAC1507 | 566 | 15 | 5 | 59 | 1      | R | AIGETAPLLMIGAAAASVR | L | 2 | 1739.9604 | 1740.9654 | 1.0050  | -1.0034 | 0.96    | 4.845 | 0.527 | 0   | 1  | 24 | 34 | 2 | 0 | 1 |
| QSV224_HALMA | 1 | Phosphate ABC transporter permease protein | pstA2 | rmAC1507 | 566 | 15 | 5 | 59 | 0.9997 | R | AIGETAPLLMIGAAAASVR | L | 3 | 1739.9604 | 1739.9646 | 0.0042  | 0       | 2.41    | 3.329 | 0.174 | 0.7 | 1  | 32 | 68 | 2 | 0 | 1 |
| QSV224_HALMA | 1 | Phosphate ABC transporter permease protein | pstA2 | rmAC1507 | 566 | 15 | 5 | 59 | 0.9964 | R | AIGETAPLLMIGAAAASVR | L | 3 | 1739.9604 | 1740.9382 | 0.9777  | -1.0034 | -14.71  | 3.269 | 0.158 | 0   | 5  | 24 | 68 | 2 | 0 | 1 |
| QSV224_HALMA | 1 | Phosphate ABC transporter permease protein | pstA2 | rmAC1507 | 566 | 15 | 5 | 59 | 0.9799 | R | AIGETAPLLMIGAAAASVR | L | 3 | 1739.9604 | 1739.9482 | -0.0123 | 0       | -7.04   | 2.566 | 0.13  | 1.1 | 45 | 23 | 68 | 2 | 0 | 1 |
| QSV224_HALMA | 1 | Phosphate ABC transporter permease protein | pstA2 | rmAC1507 | 566 | 15 | 5 | 59 | 0.9269 | R | AIGETAPLLMIGAAAASVR | L | 3 | 1739.9604 | 1740.6682 | 0.7077  | -1.0034 | -169.89 | 2.685 | 0.102 | 0.6 | 27 | 23 | 68 | 2 | 0 | 1 |
| QSV224_HALMA | 1 | Phosphate ABC transporter permease protein | pstA2 | rmAC1507 | 566 | 15 | 5 | 59 | 1      | R | KPETGWHGNSDVNHLR    | G | 3 | 1974.9296 | 1974.9301 | 0.0005  | 0       | 0.26    | 5.012 | 0.402 | 0   | 1  | 34 | 64 | 2 | 0 | 1 |
| QSV224_HALMA | 1 | Phosphate ABC transporter permease protein | pstA  |          |     |    |   |    |        |   |                     |   |   |           |           |         |         |         |       |       |     |    |    |    |   |   |   |







|              |   |                                |       |          |     |     |   |    |        |   |                         |   |   |           |           |         |         |        |       |       |     |    |    |     |   |   |   |
|--------------|---|--------------------------------|-------|----------|-----|-----|---|----|--------|---|-------------------------|---|---|-----------|-----------|---------|---------|--------|-------|-------|-----|----|----|-----|---|---|---|
| Q5V271_HALMA | 1 | NADH dehydrogenase I L subunit | nuoL2 | rmAC1455 | 697 | 9.6 | 8 | 52 | 0.9997 | K | FDQGVVDGVVNGISSVSLFGGSR | I | 3 | 2295.1495 | 2296.5682 | 1.4186  | -1.0034 | 180.95 | 3.243 | 0.32  | 0.1 | 52 | 23 | 88  | 2 | 0 | 1 |
| Q5V271_HALMA | 1 | NADH dehydrogenase I L subunit | nuoL2 | rmAC1455 | 697 | 9.6 | 8 | 52 | 0.9972 | K | FDQGVVDGVVNGISSVSLFGGSR | I | 3 | 2295.1495 | 2296.5682 | 1.4186  | -1.0034 | 180.95 | 3.243 | 0.32  | 0.1 | 52 | 23 | 88  | 2 | 0 | 1 |
| Q5V271_HALMA | 1 | NADH dehydrogenase I L subunit | nuoL2 | rmAC1455 | 697 | 9.6 | 8 | 52 | 0.9973 | R | MYLTLFTHGDAR            | S | 2 | 1324.6285 | 1324.6220 | -0.0065 | 0       | -4.89  | 2.593 | 0.09  | 0.1 | 1  | 15 | 20  | 2 | 0 | 1 |
| Q5V271_HALMA | 1 | NADH dehydrogenase I L subunit | nuoL2 | rmAC1455 | 697 | 9.6 | 8 | 52 | 0.9966 | R | MYLTLFTHGDAR            | S | 3 | 1308.6285 | 1308.6283 | -0.0002 | 0       | -0.18  | 2.616 | 0.164 | 0.5 | 28 | 16 | 40  | 2 | 0 | 1 |
| Q5V271_HALMA | 1 | NADH dehydrogenase I L subunit | nuoL2 | rmAC1455 | 697 | 9.6 | 8 | 52 | 1      | R | SLYAGADPVEHTDK          | L | 2 | 1501.7049 | 1501.7059 | 0.0010  | 0       | 0.65   | 4.124 | 0.496 | 0   | 1  | 20 | 26  | 2 | 0 | 1 |
| Q5V271_HALMA | 1 | NADH dehydrogenase I L subunit | nuoL2 | rmAC1455 | 697 | 9.6 | 8 | 52 | 1      | R | SLYAGADPVEHTDK          | L | 2 | 1501.7049 | 1501.7077 | 0.0028  | 0       | 1.87   | 3.757 | 0.322 | 0   | 1  | 18 | 26  | 2 | 0 | 1 |
| Q5V271_HALMA | 1 | NADH dehydrogenase I L subunit | nuoL2 | rmAC1455 | 697 | 9.6 | 8 | 52 | 1      | R | SLYAGADPVEHTDKLGGKL     | T | 2 | 1970.0109 | 1970.0128 | 0.0019  | 0       | 0.95   | 5.537 | 0.621 | 0   | 1  | 26 | 36  | 2 | 1 | 1 |
| Q5V271_HALMA | 1 | NADH dehydrogenase I L subunit | nuoL2 | rmAC1455 | 697 | 9.6 | 8 | 52 | 1      | R | SLYAGADPVEHTDKLGGKL     | T | 2 | 1970.0109 | 1970.0174 | 0.0065  | 0       | 3.30   | 5.96  | 0.565 | 0   | 1  | 25 | 36  | 2 | 1 | 1 |
| Q5V271_HALMA | 1 | NADH dehydrogenase I L subunit | nuoL2 | rmAC1455 | 697 | 9.6 | 8 | 52 | 1      | R | SLYAGADPVEHTDKLGGKL     | T | 2 | 1970.0109 | 1971.0204 | 1.0094  | -1.0034 | 3.09   | 5.202 | 0.554 | 0   | 1  | 26 | 36  | 2 | 1 | 1 |
| Q5V271_HALMA | 1 | NADH dehydrogenase I L subunit | nuoL2 | rmAC1455 | 697 | 9.6 | 8 | 52 | 0.9997 | R | SLYAGADPVEHTDKLGGKL     | T | 4 | 1970.0109 | 1970.0130 | 0.0021  | 0       | 1.06   | 1.832 | 0.192 | 0.6 | 1  | 34 | 108 | 2 | 1 | 1 |
| Q5V271_HALMA | 1 | NADH dehydrogenase I L subunit | nuoL2 | rmAC1455 | 697 | 9.6 | 8 | 52 | 0.9985 | R | SLYAGADPVEHTDKLGGKL     | T | 3 | 1970.0109 | 1970.0099 | -0.0010 | 0       | -0.52  | 2.242 | 0.278 | 0.2 | 2  | 27 | 72  | 2 | 1 | 1 |
| Q5V271_HALMA | 1 | NADH dehydrogenase I L subunit | nuoL2 | rmAC1455 | 697 | 9.6 | 8 | 52 | 0.9935 | R | SLYAGADPVEHTDKLGGKL     | T | 4 | 1970.0109 | 1970.0107 | -0.0002 | 0       | -0.12  | 1.753 | 0.109 | 4.6 | 3  | 34 | 108 | 2 | 1 | 1 |
| Q5V271_HALMA | 1 | NADH dehydrogenase I L subunit | nuoL2 | rmAC1455 | 697 | 9.6 | 8 | 52 | 0.9903 | R | SLYAGADPVEHTDKLGGKL     | T | 3 | 1970.0109 | 1970.0103 | -0.0006 | 0       | -0.33  | 2.256 | 0.219 | 0.2 | 5  | 25 | 72  | 2 | 1 | 1 |
| Q5V271_HALMA | 1 | NADH dehydrogenase I L subunit | nuoL2 | rmAC1455 | 697 | 9.6 | 8 | 52 | 0.9895 | R | SLYAGADPVEHTDKLGGKL     | T | 4 | 1970.0109 | 1970.0100 | -0.0010 | 0       | -0.49  | 1.964 | 0.126 | 3.4 | 9  | 28 | 108 | 2 | 1 | 1 |
| Q5V271_HALMA | 1 | NADH dehydrogenase I L subunit | nuoL2 | rmAC1455 | 697 | 9.6 | 8 | 52 | 0.9805 | R | SLYAGADPVEHTDKLGGKL     | T | 4 | 1970.0109 | 1970.0123 | 0.0014  | 0       | 0.69   | 2.045 | 0.082 | 0.9 | 6  | 31 | 108 | 2 | 1 | 1 |
| Q5V271_HALMA | 1 | NADH dehydrogenase I L subunit | nuoL2 | rmAC1455 | 697 | 9.6 | 8 | 52 | 0.9629 | R | SLYAGADPVEHTDKLGGKL     | T | 3 | 1970.0109 | 1970.0134 | 0.0025  | 0       | 1.25   | 2.417 | 0.148 | 0.3 | 6  | 22 | 72  | 2 | 1 | 1 |
| Q5V271_HALMA | 1 | NADH dehydrogenase I L subunit | nuoL2 | rmAC1455 | 697 | 9.6 | 8 | 52 | 0.9383 | R | VMNKFDOGVDV             | G |   |           |           |         |         |        |       |       |     |    |    |     |   |   |   |

[illegible]

|              |   |                                            |         |          |     |      |    |    |        |   |                           |   |   |           |           |         |         |         |       |       |     |   |    |     |   |   |   |
|--------------|---|--------------------------------------------|---------|----------|-----|------|----|----|--------|---|---------------------------|---|---|-----------|-----------|---------|---------|---------|-------|-------|-----|---|----|-----|---|---|---|
| Q5V4X9_HALMA | 1 | Glutamine ABC transporter permease protein | glnH1   | rmAC0381 | 262 | 34.4 | 9  | 49 | 1      | D | PYYSSNQAIIVR              | E | 2 | 1409.7303 | 1409.7308 | 0.0005  | 0       | 0.34    | 3.854 | 0.51  | 0   | 1 | 19 | 22  | 1 | 0 | 1 |
| Q5V4X9_HALMA | 1 | Glutamine ABC transporter permease protein | glnH1   | rmAC0381 | 262 | 34.4 | 9  | 49 | 1      | D | PYYSSNQAIIVR              | E | 2 | 1409.7303 | 1409.7300 | -0.0004 | 0       | -0.26   | 3.825 | 0.499 | 0   | 1 | 19 | 22  | 1 | 0 | 1 |
| Q5V4X9_HALMA | 1 | Glutamine ABC transporter permease protein | glnH1   | rmAC0381 | 262 | 34.4 | 9  | 49 | 1      | D | PYYSSNQAIIVR              | E | 2 | 1409.7303 | 1409.7324 | 0.0021  | 0       | 1.47    | 4.088 | 0.56  | 0   | 1 | 19 | 22  | 1 | 0 | 1 |
| Q5V4X9_HALMA | 1 | Glutamine ABC transporter permease protein | glnH1   | rmAC0381 | 262 | 34.4 | 9  | 49 | 1      | D | PYYSSNQAIIVR              | E | 2 | 1409.7303 | 1409.7351 | 0.0048  | 0       | 3.37    | 3.379 | 0.472 | 0   | 1 | 18 | 22  | 1 | 0 | 1 |
| Q5V4X9_HALMA | 1 | Glutamine ABC transporter permease protein | glnH1   | rmAC0381 | 262 | 34.4 | 9  | 49 | 0.9994 | D | PYYSSNQAIIVR              | E | 2 | 1409.7303 | 1409.7346 | 0.0043  | 0       | 3.03    | 2.889 | 0.385 | 0   | 1 | 15 | 22  | 1 | 0 | 1 |
| Q5V4X9_HALMA | 1 | Glutamine ABC transporter permease protein | glnH1   | rmAC0381 | 262 | 34.4 | 9  | 49 | 1      | K | SLIPALNNGNVDDVVAAGMTINDER | D | 2 | 2482.2486 | 2481.8454 | -0.4032 | 0       | -162.42 | 4.404 | 0.6   | 0   | 1 | 25 | 46  | 2 | 0 | 1 |
| Q5V4X9_HALMA | 1 | Glutamine ABC transporter permease protein | glnH1   | rmAC0381 | 262 | 34.4 | 9  | 49 | 1      | K | SLIPALNNGNVDDVVAAGMTINDER | D | 2 | 2482.2486 | 2484.2454 | 1.9968  | -2.0067 | -3.98   | 4.745 | 0.401 | 0   | 1 | 31 | 46  | 2 | 0 | 1 |
| Q5V4X9_HALMA | 1 | Glutamine ABC transporter permease protein | glnH1   | rmAC0381 | 262 | 34.4 | 9  | 49 | 1      | K | SLIPALNNGNVDDVVAAGMTINDER | D | 3 | 2482.2486 | 2483.2452 | 0.9966  | -1.0034 | -2.73   | 4.412 | 0.43  | 0   | 1 | 36 | 92  | 2 | 0 | 1 |
| Q5UWB0_HALMA | 1 | Hypothetical protein                       | rmB0272 | rmB0272  | 521 | 41.8 | 20 | 48 | 1      | R | VLAMEYLGTQK               | V | 2 | 1251.6533 | 1251.6563 | 0.0030  | 0       | 2.41    | 4.001 | 0.333 | 0   | 1 | 18 | 20  | 2 | 0 | 1 |
| Q5UWB0_HALMA | 1 | Hypothetical protein                       | rmB0272 | rmB0272  | 521 | 41.8 | 20 | 48 | 1      | R | DTMLELGPAFIK              | V | 2 | 1333.6952 | 1333.6970 | 0.0018  | 0       | 1.33    | 4.089 | 0.259 | 0   | 1 | 19 | 22  | 2 | 0 | 1 |
| Q5UWB0_HALMA | 1 | Hypothetical protein                       | rmB0272 | rmB0272  | 521 | 41.8 | 20 | 48 | 0.9992 | R | DTMLELGPAFIK              | V | 2 | 1349.6952 | 1351.3454 | 1.6502  | -2.0067 | -264.12 | 2.802 | 0.253 | 0.1 | 1 | 18 | 22  | 2 | 0 | 1 |
| Q5UWB0_HALMA | 1 | Hypothetical protein                       | rmB0272 | rmB0272  | 521 | 41.8 | 20 | 48 | 1      | R | DVDDLVDVLVALDVLEPHVNR     | A | 3 | 2344.2274 | 2344.2273 | -0.0001 | 0       | -0.05   | 5.613 | 0.561 | 0   | 1 | 40 | 80  | 2 | 0 | 1 |
| Q5UWB0_HALMA | 1 | Hypothetical protein                       | rmB0272 | rmB0272  | 521 | 41.8 | 20 | 48 | 1      | R | DVDDLVDVLVALDVLEPHVNR     | A | 3 | 2344.2274 | 2344.2295 | 0.0021  | 0       | 0.89    | 4.468 | 0.484 | 0   | 1 | 38 | 80  | 2 | 0 | 1 |
| Q5UWB0_HALMA | 1 | Hypothetical protein                       | rmB0272 | rmB0272  | 521 | 41.8 | 20 | 48 | 1      | R | DVDDLVDVLVALDVLEPHVNR     | A | 3 | 2344.2274 | 2344.2313 | 0.0039  | 0       | 1.67    | 4.868 | 0.544 | 0   | 1 | 36 | 80  | 2 | 0 | 1 |
| Q5UWB0_HALMA | 1 | Hypothetical protein                       | rmB0272 | rmB0272  | 521 | 41.8 | 20 | 48 | 1      | R | DVDDLVDVLVALDVLEPHVNR     | A | 3 | 2344.2274 | 2344.2328 | 0.0054  | 0       | 2.30    | 5.389 | 0.549 | 0   | 1 | 40 | 80  | 2 | 0 | 1 |
| Q5UWB0_HALMA | 1 | Hypothetical protein                       | rmB0272 | rmB0272  | 521 | 41.8 | 20 | 48 | 1      | R | DVDDLVDVLVALDVLEPHVNR     | A | 4 | 2344.2274 | 2344.2326 | 0.0052  | 0       | 2.21    | 3.366 | 0.259 | 0   | 1 | 34 | 120 | 2 | 0 | 1 |
| Q5UWB0_HALMA | 1 | Hypothetical protein                       | rmB0272 | rmB0272  | 521 | 41.8 | 20 | 48 | 1      | R | DVDDLVDVLVALDVLEPHVNR     | V | 4 | 2856.4981 | 2856.4941 | -0.0040 | 0       | -1.41   | 5.184 | 0.337 | 0   | 1 | 54 | 150 | 2 | 1 | 1 |
| Q5UWB0_HALMA |   |                                            |         |          |     |      |    |    |        |   |                           |   |   |           |           |         |         |         |       |       |     |   |    |     |   |   |   |



|                   |   |                                          |        |          |     |      |    |    |        |   |                                        |   |   |           |           |         |         |       |       |       |     |     |    |     |   |   |   |
|-------------------|---|------------------------------------------|--------|----------|-----|------|----|----|--------|---|----------------------------------------|---|---|-----------|-----------|---------|---------|-------|-------|-------|-----|-----|----|-----|---|---|---|
| Q5UXL5_HALMA      | 1 | Oligopeptide ABC transporter ATP-binding | ykfD   | rmAC3295 | 469 | 36.9 | 13 | 43 | 1      | R | NAQMVFDQPESSILNDRMTVGEIIREPLDVHEQGTAR  | E | 4 | 4081.9586 | 4083.9709 | 2.0123  | -2.0067 | 1.36  | 3.47  | 0.417 | 0   | 1   | 43 | 210 | 2 | 2 | 1 |
| Q5UXL5_HALMA      | 1 | Oligopeptide ABC transporter ATP-binding | ykfD   | rmAC3295 | 469 | 36.9 | 13 | 43 | 0.9888 | M | SESVDVTYSHQADETLLDVQDLKTYEGGGLLGGDPVK  | A | 4 | 4033.9644 | 4033.9794 | 0.0150  | 0       | 3.72  | 4.054 | 0.312 | 0.1 | 1   | 45 | 222 | 1 | 1 | 1 |
| Q5UXL5_HALMA      | 1 | Oligopeptide ABC transporter ATP-binding | ykfD   | rmAC3295 | 469 | 36.9 | 13 | 43 | 0.9157 | M | SESVDVTYSHQADETLLDVQDLKTYEGGGLLGGDPVK  | A | 4 | 4033.9644 | 4035.9709 | 2.0065  | -2.0067 | -0.06 | 3.766 | 0.265 | 0.1 | 12  | 39 | 222 | 1 | 1 | 1 |
| Q5UXL5_HALMA      | 1 | Oligopeptide ABC transporter ATP-binding | ykfD   | rmAC3295 | 469 | 36.9 | 13 | 43 | 1      | R | TLLDQVGLMPEHYR                         | Y | 3 | 1833.9083 | 1833.9082 | -0.0002 | 0       | -0.08 | 3.057 | 0.292 | 0   | 1   | 26 | 56  | 2 | 0 | 1 |
| Q5UXL5_HALMA      | 1 | Oligopeptide ABC transporter ATP-binding | ykfD   | rmAC3295 | 469 | 36.9 | 13 | 43 | 1      | R | TLLDQVGLMPEHYR                         | Y | 3 | 1833.9083 | 1833.9113 | 0.0030  | 0       | 1.61  | 2.95  | 0.261 | 0   | 1   | 24 | 56  | 2 | 0 | 1 |
| Q5UXL5_HALMA      | 1 | Oligopeptide ABC transporter ATP-binding | ykfD   | rmAC3295 | 469 | 36.9 | 13 | 43 | 1      | R | TLLDQVGLMPEHYR                         | Y | 3 | 1849.9083 | 1849.9033 | -0.0050 | 0       | -2.69 | 2.522 | 0.31  | 0.2 | 2   | 21 | 56  | 2 | 0 | 1 |
| Q5UXL5_HALMA      | 1 | Oligopeptide ABC transporter ATP-binding | ykfD   | rmAC3295 | 469 | 36.9 | 13 | 43 | 1      | R | TLLDQVGLMPEHYR                         | Y | 2 | 1833.9083 | 1834.9254 | 1.0171  | -1.0034 | 7.51  | 3.812 | 0.481 | 0   | 1   | 21 | 28  | 2 | 0 | 1 |
| Q5UXL5_HALMA      | 1 | Oligopeptide ABC transporter ATP-binding | ykfD   | rmAC3295 | 469 | 36.9 | 13 | 43 | 0.9999 | R | TLLDQVGLMPEHYR                         | Y | 2 | 1833.9083 | 1834.9054 | 0.9971  | -1.0034 | -3.39 | 2.797 | 0.382 | 0   | 1   | 14 | 28  | 2 | 0 | 1 |
| Q5UXL5_HALMA      | 1 | Oligopeptide ABC transporter ATP-binding | ykfD   | rmAC3295 | 469 | 36.9 | 13 | 43 | 0.9997 | R | TLLDQVGLMPEHYR                         | Y | 3 | 1849.9083 | 1849.9044 | -0.0039 | 0       | -2.10 | 2.06  | 0.286 | 0.3 | 1   | 23 | 56  | 2 | 0 | 1 |
| Q5UXL5_HALMA      | 1 | Oligopeptide ABC transporter ATP-binding | ykfD   | rmAC3295 | 469 | 36.9 | 13 | 43 | 1      | K | TYEGGGGLGGDPVK                         | 0 | 1 | 1524.7460 | 1524.7479 | 0.0019  | 0       | 1.23  | 3.531 | 0.406 | 0   | 1   | 20 | 28  | 2 | 0 | 1 |
| Q5UXL5_HALMA      | 1 | Oligopeptide ABC transporter ATP-binding | ykfD   | rmAC3295 | 469 | 36.9 | 13 | 43 | 0.9928 | R | VGVMYVLGNLMEVGPTEQLFQSPENPYTR          | A | 3 | 3168.5260 | 3169.5382 | 1.0121  | -1.0034 | 2.78  | 2.769 | 0.247 | 0.6 | 127 | 20 | 108 | 2 | 0 | 1 |
| Q5UXL5_HALMA      | 1 | Oligopeptide ABC transporter ATP-binding | ykfD   | rmAC3295 | 469 | 36.9 | 13 | 43 | 0.9886 | R | VGVMYVLGNLMEVGPTEQLFQSPENPYTR          | A | 3 | 3184.5260 | 3184.5430 | 0.0170  | 0       | 5.33  | 4.361 | 0.518 | 0   | 2   | 27 | 108 | 2 | 0 | 1 |
| RL18E_HALMAReview | 1 | 50S ribosomal protein L18e (H129) (L19)  | rpl18e | rmAC0064 | 116 | 81   | 12 | 43 | 0.9999 | R | SSGGVWVGDVAAERLEKPR                    | R | 2 | 1912.9755 | 1912.9802 | 0.0047  | 0       | 2.44  | 3.811 | 0.275 | 0   | 1   | 19 | 34  | 2 | 1 | 1 |
| RL18E_HALMAReview | 1 | 50S ribosomal protein L18e (H129) (L19)  | rpl18e | rmAC0064 | 116 | 81   | 12 | 43 | 0.9929 | K | DVTVAADVFSGTAEKIDQVGEAVSLEQAIENNPESHVR | V | 3 | 4182.0353 | 4184.0782 | 2.0428  | -2.0067 | 8.64  | 3.622 | 0.215 | 0.2 | 25  | 23 | 156 | 2 | 1 | 1 |
| RL18E_HALMAReview | 1 | 50S ribosomal protein L18e (H129) (L19)  | rpl18e | rmAC0064 | 116 | 81   | 12 | 43 | 1      | K | IDQVGEAVSLEQAIENNPESHVR                | V | 3 | 2590.2623 | 2590.2691 | 0.0067  | 0       | 2.60  | 4.846 | 0.46  | 0   | 1   | 41 | 92  | 2 | 0 | 1 |
| RL18E_HALMAReview | 1 | 50S ribosomal protein L18e (H129) (L19)  | rpl18e | rmAC0064 | 116 | 81   | 12 | 43 | 1      | K | IDQVGEAVSLEQAIENNPESHVR                | V | 3 | 2590.2623 | 2590.2647 | 0.0023  | 0       | 0.91  | 5.759 | 0.39  | 0   | 1   | 44 | 92  | 2 | 0 | 1 |
| RL18E_HALMAReview | 1 | 50S ribosomal protein L18e (H129) (L19)  | rpl18e | rmAC0064 | 116 | 8    |    |    |        |   |                                        |   |   |           |           |         |         |       |       |       |     |     |    |     |   |   |   |

|              |   |                         |      |         |     |    |   |    |        |   |                              |   |   |           |           |         |         |        |       |       |     |    |    |     |   |   |   |
|--------------|---|-------------------------|------|---------|-----|----|---|----|--------|---|------------------------------|---|---|-----------|-----------|---------|---------|--------|-------|-------|-----|----|----|-----|---|---|---|
| Q5V6S5_HALMA | 1 | Regulatory protein PrnC | prnC | pNG7059 | 225 | 64 | 9 | 42 | 1      | K | MNVDADESQWQLRPAPK            | Q | 2 | 2089.9891 | 2089.9952 | 0.0061  | 0       | 2.91   | 4.534 | 0.494 | 0   | 1  | 21 | 34  | 2 | 0 | 1 |
| Q5V6S5_HALMA | 1 | Regulatory protein PrnC | prnC | pNG7059 | 225 | 64 | 9 | 42 | 1      | K | MNVDADESQWQLRPAPK            | Q | 3 | 2089.9891 | 2089.9921 | 0.0030  | 0       | 1.45   | 2.758 | 0.304 | 0.5 | 1  | 28 | 68  | 2 | 0 | 1 |
| Q5V6S5_HALMA | 1 | Regulatory protein PrnC | prnC | pNG7059 | 225 | 64 | 9 | 42 | 0.9601 | K | MNVDADESQWQLRPAPK            | Q | 3 | 2105.9891 | 2105.9875 | -0.0016 | 0       | -0.77  | 2.598 | 0.074 | 0.7 | 17 | 20 | 68  | 2 | 0 | 1 |
| Q5V6S5_HALMA | 1 | Regulatory protein PrnC | prnC | pNG7059 | 225 | 64 | 9 | 42 | 0.9842 | R | NIQSHAQNGGYAAGVR             | F | 3 | 1698.8186 | 1699.8034 | 0.9847  | -1.0034 | -10.95 | 2.239 | 0.151 | 0.7 | 1  | 24 | 60  | 2 | 0 | 1 |
| Q5V6S5_HALMA | 1 | Regulatory protein PrnC | prnC | pNG7059 | 225 | 64 | 9 | 42 | 1      | R | SKSPDEETIADLETVR             | T | 3 | 1901.9582 | 1901.9632 | 0.0049  | 0       | 2.59   | 4.287 | 0.31  | 0.1 | 2  | 28 | 64  | 2 | 1 | 1 |
| Q5V6S5_HALMA | 1 | Regulatory protein PrnC | prnC | pNG7059 | 225 | 64 | 9 | 42 | 1      | R | SKSPDEETIADLETVR             | T | 2 | 1901.9582 | 1901.9669 | 0.0087  | 0       | 4.56   | 5.315 | 0.497 | 0   | 1  | 26 | 32  | 2 | 1 | 1 |
| Q5V6S5_HALMA | 1 | Regulatory protein PrnC | prnC | pNG7059 | 225 | 64 | 9 | 42 | 1      | R | SKSPDEETIADLETVR             | T | 3 | 1901.9582 | 1901.9619 | 0.0037  | 0       | 1.92   | 4.695 | 0.275 | 0   | 3  | 29 | 64  | 2 | 1 | 1 |
| Q5V6S5_HALMA | 1 | Regulatory protein PrnC | prnC | pNG7059 | 225 | 64 | 9 | 42 | 1      | R | SKSPDEETIADLETVR             | T | 3 | 1901.9582 | 1901.9615 | 0.0033  | 0       | 1.73   | 4.669 | 0.398 | 0   | 2  | 29 | 64  | 2 | 1 | 1 |
| Q5V6S5_HALMA | 1 | Regulatory protein PrnC | prnC | pNG7059 | 225 | 64 | 9 | 42 | 1      | R | SKSPDEETIADLETVR             | T | 2 | 1901.9582 | 1901.9603 | 0.0021  | 0       | 1.09   | 5.014 | 0.511 | 0   | 1  | 25 | 32  | 2 | 1 | 1 |
| Q5V6S5_HALMA | 1 | Regulatory protein PrnC | prnC | pNG7059 | 225 | 64 | 9 | 42 | 0.9899 | R | SKSPDEETIADLETVR             | T | 3 | 1901.9582 | 1901.9518 | -0.0064 | 0       | -3.38  | 3.002 | 0.176 | 0.5 | 30 | 22 | 64  | 2 | 1 | 1 |
| Q5V6S5_HALMA | 1 | Regulatory protein PrnC | prnC | pNG7059 | 225 | 64 | 9 | 42 | 1      | K | SPDEETIADLETVR               | T | 2 | 1686.8312 | 1686.8360 | 0.0048  | 0       | 2.85   | 5.176 | 0.551 | 0   | 1  | 24 | 28  | 2 | 0 | 1 |
| Q5V6S5_HALMA | 1 | Regulatory protein PrnC | prnC | pNG7059 | 225 | 64 | 9 | 42 | 1      | K | SPDEETIADLETVR               | T | 3 | 1686.8312 | 1686.8357 | 0.0044  | 0       | 2.63   | 4.876 | 0.423 | 0   | 1  | 33 | 56  | 2 | 0 | 1 |
| Q5V6S5_HALMA | 1 | Regulatory protein PrnC | prnC | pNG7059 | 225 | 64 | 9 | 42 | 1      | K | SPDEETIADLETVR               | T | 2 | 1686.8312 | 1686.8318 | 0.0005  | 0       | 0.32   | 4.944 | 0.563 | 0   | 1  | 24 | 28  | 2 | 0 | 1 |
| Q5V6S5_HALMA | 1 | Regulatory protein PrnC | prnC | pNG7059 | 225 | 64 | 9 | 42 | 1      | K | SPDEETIADLETVR               | T | 3 | 1686.8312 | 1686.8335 | 0.0022  | 0       | 1.32   | 4.518 | 0.38  | 0   | 1  | 30 | 56  | 2 | 0 | 1 |
| Q5V6S5_HALMA | 1 | Regulatory protein PrnC | prnC | pNG7059 | 225 | 64 | 9 | 42 | 1      | K | SPDEETIADLETVR               | T | 2 | 1686.8312 | 1686.8343 | 0.0031  | 0       | 1.84   | 5.18  | 0.536 | 0   | 1  | 24 | 28  | 2 | 0 | 1 |
| Q5V6S5_HALMA | 1 | Regulatory protein PrnC | prnC | pNG7059 | 225 | 64 | 9 | 42 | 1      | K | SPDEETIADLETVR               | T | 3 | 1686.8312 | 1686.8309 | -0.0003 | 0       | -0.20  | 4.067 | 0.395 | 0   | 1  | 31 | 56  | 2 | 0 | 1 |
| Q5V6S5_HALMA | 1 | Regulatory protein PrnC | prnC | pNG7059 | 225 | 64 | 9 | 42 | 1      | R | TEPEDMDMYMFTHTALTLLVNADGFVER | A | 3 | 3245.4719 | 3246.4882 | 1.0162  | -1.0034 | 3.97   | 4.691 | 0.335 | 0   | 4  | 26 | 108 | 2 | 0 | 1 |
| Q5V6S5_HALMA | 1 | Regulatory protein PrnC | prnC | pNG7059 | 225 | 64 | 9 | 42 | 1</    |   |                              |   |   |           |           |         |         |        |       |       |     |    |    |     |   |   |   |

[illegible]

|                   |   |                                                              |         |         |     |      |    |    |        |   |                      |   |   |           |           |         |         |        |       |       |     |    |    |    |   |   |   |
|-------------------|---|--------------------------------------------------------------|---------|---------|-----|------|----|----|--------|---|----------------------|---|---|-----------|-----------|---------|---------|--------|-------|-------|-----|----|----|----|---|---|---|
| PHNC2_HALMAReview | 1 | Phosphonates import ATP-binding protein phnC 2 (EC 3.6.3.28) | phnC2   | rmB0320 | 271 | 66.1 | 13 | 38 | 1      | K | ILLADEPTSLDPDTSR     | E | 2 | 1812.9105 | 1812.9156 | 0.0051  | 0       | 2.81   | 4.694 | 0.59  | 0   | 1  | 26 | 32 | 2 | 0 | 1 |
| PHNC2_HALMAReview | 1 | Phosphonates import ATP-binding protein phnC 2 (EC 3.6.3.28) | phnC2   | rmB0320 | 271 | 66.1 | 13 | 38 | 1      | K | ILLADEPTSLDPDTSR     | E | 2 | 1812.9105 | 1812.9156 | 0.0036  | 0       | 2.00   | 4.394 | 0.399 | 0   | 1  | 22 | 32 | 2 | 0 | 1 |
| PHNC2_HALMAReview | 1 | Phosphonates import ATP-binding protein phnC 2 (EC 3.6.3.28) | phnC2   | rmB0320 | 271 | 66.1 | 13 | 38 | 1      | R | ISLDDTEVTGLEK        | S | 2 | 1418.7140 | 1418.7175 | 0.0035  | 0       | 2.45   | 3.814 | 0.291 | 0   | 1  | 22 | 24 | 2 | 0 | 1 |
| PHNC2_HALMAReview | 1 | Phosphonates import ATP-binding protein phnC 2 (EC 3.6.3.28) | phnC2   | rmB0320 | 271 | 66.1 | 13 | 38 | 1      | R | ISLDDTEVTGLEK        | S | 2 | 1418.7140 | 1418.7175 | 0.0032  | 0       | 2.28   | 4.767 | 0.322 | 0   | 1  | 22 | 24 | 2 | 0 | 1 |
| PHNC2_HALMAReview | 1 | Phosphonates import ATP-binding protein phnC 2 (EC 3.6.3.28) | phnC2   | rmB0320 | 271 | 66.1 | 13 | 38 | 1      | R | ISLDDTEVTGLEK        | S | 2 | 1418.7140 | 1418.7159 | 0.0019  | 0       | 1.33   | 3.975 | 0.303 | 0   | 1  | 22 | 24 | 2 | 0 | 1 |
| PHNC2_HALMAReview | 1 | Phosphonates import ATP-binding protein phnC 2 (EC 3.6.3.28) | phnC2   | rmB0320 | 271 | 66.1 | 13 | 38 | 1      | R | ISLDDTEVTGLEK        | S | 2 | 1418.7140 | 1418.7171 | 0.0031  | 0       | 2.19   | 3.965 | 0.314 | 0   | 1  | 22 | 24 | 2 | 0 | 1 |
| PHNC2_HALMAReview | 1 | Phosphonates import ATP-binding protein phnC 2 (EC 3.6.3.28) | phnC2   | rmB0320 | 271 | 66.1 | 13 | 38 | 1      | R | LGYLSTWNAFR          | R | 2 | 1326.6720 | 1326.6753 | 0.0032  | 0       | 2.44   | 3.157 | 0.297 | 0   | 1  | 17 | 20 | 2 | 0 | 1 |
| PHNC2_HALMAReview | 1 | Phosphonates import ATP-binding protein phnC 2 (EC 3.6.3.28) | phnC2   | rmB0320 | 271 | 66.1 | 13 | 38 | 1      | R | LTVMENILSGR          | L | 2 | 1231.6594 | 1231.6617 | 0.0023  | 0       | 1.86   | 3.011 | 0.42  | 0   | 1  | 18 | 20 | 2 | 0 | 1 |
| PHNC2_HALMAReview | 1 | Phosphonates import ATP-binding protein phnC 2 (EC 3.6.3.28) | phnC2   | rmB0320 | 271 | 66.1 | 13 | 38 | 1      | R | LTVMENILSGR          | L | 2 | 1231.6594 | 1231.6600 | 0.0006  | 0       | 0.47   | 3.191 | 0.394 | 0   | 1  | 18 | 20 | 2 | 0 | 1 |
| PHNC2_HALMAReview | 1 | Phosphonates import ATP-binding protein phnC 2 (EC 3.6.3.28) | phnC2   | rmB0320 | 271 | 66.1 | 13 | 38 | 0.9680 | R | LTVMENILSGR          | L | 2 | 1231.6594 | 1232.6364 | 0.9770  | -1.0034 | -21.37 | 2.58  | 0.144 | 0.3 | 29 | 14 | 20 | 2 | 0 | 1 |
| PHNC2_HALMAReview | 1 | Phosphonates import ATP-binding protein phnC 2 (EC 3.6.3.28) | phnC2   | rmB0320 | 271 | 66.1 | 13 | 38 | 1      | - | MLTVDNLEKTYDSGDR     | A | 3 | 1855.8622 | 1855.8592 | -0.0030 | 0       | -1.62  | 3.099 | 0.336 | 0   | 3  | 22 | 60 | 2 | 1 | 1 |
| PHNC2_HALMAReview | 1 | Phosphonates import ATP-binding protein phnC 2 (EC 3.6.3.28) | phnC2   | rmB0320 | 271 | 66.1 | 13 | 38 | 1      | R | RDMGMIFQEFNLVER      | L | 3 | 1883.9022 | 1885.9282 | 2.0259  | -2.0067 | 10.22  | 3.551 | 0.271 | 0.2 | 2  | 24 | 56 | 2 | 0 | 1 |
| PHNC2_HALMAReview | 1 | Phosphonates import ATP-binding protein phnC 2 (EC 3.6.3.28) | phnC2   | rmB0320 | 271 | 66.1 | 13 | 38 | 1      | R | VNLEGVENNR           | A | 2 | 1142.5680 | 1142.5654 | -0.0026 | 0       | -2.25  | 3.405 | 0.271 | 0   | 1  | 16 | 18 | 2 | 0 | 1 |
| PHNC2_HALMAReview | 1 | Phosphonates import ATP-binding protein phnC 2 (EC 3.6.3.28) | phnC2   | rmB0320 | 271 | 66.1 | 13 | 38 | 0.9978 | R | VNLEGVENNR           | A | 2 | 1142.5680 | 1142.5854 | 0.0174  | 0       | 15.25  | 2.636 | 0.131 | 0.4 | 6  | 14 | 18 | 2 | 0 | 1 |
| PHNC2_HALMAReview | 1 | Phosphonates import ATP-binding protein phnC 2 (EC 3.6.3.28) | phnC2   | rmB0320 | 271 | 66.1 | 13 | 38 | 1      | R | VNLEGVENNRRADELSGGQR | Q | 3 | 2055.9933 | 2055.9988 | 0.0055  | 0       | 2.66   | 3.181 | 0.417 | 0   | 1  | 29 | 72 | 2 | 1 | 1 |
| PHNC2_HALMAReview | 1 | Phosphonates import ATP-binding protein phnC 2 (EC 3.6.3.28) | phnC2   | rmB0320 | 271 | 66.1 | 13 | 38 | 1      | R | VNLEGVENNRRADELSGGQR | Q | 3 | 2055.9933 | 2055.9959 | 0.0025  | 0       | 1.24   | 3.007 | 0.333 | 0   | 1  | 30 | 72 | 2 | 1 | 1 |
| PHNC2_HALMAReview | 1 | Phosphonates import ATP-binding protein phnC 2 (EC 3.6.3.28) | phnC2</ |         |     |      |    |    |        |   |                      |   |   |           |           |         |         |        |       |       |     |    |    |    |   |   |   |

[illegible]



|              |   |                   |         |         |     |      |    |    |        |   |                               |   |   |           |           |         |   |       |       |       |     |   |    |     |   |   |   |
|--------------|---|-------------------|---------|---------|-----|------|----|----|--------|---|-------------------------------|---|---|-----------|-----------|---------|---|-------|-------|-------|-----|---|----|-----|---|---|---|
| Q5V6N0_HALMA | 1 | Putative permease | pNG7110 | pNG7110 | 318 | 52.8 | 14 | 36 | 1      | R | ATAPAEASAEPPVDSAASESESVSK     | A | 2 | 2277.0132 | 2277.0130 | -0.0002 | 0 | -0.08 | 5.168 | 0.592 | 0   | 1 | 28 | 44  | 2 | 0 | 1 |
| Q5V6N0_HALMA | 1 | Putative permease | pNG7110 | pNG7110 | 318 | 52.8 | 14 | 36 | 1      | R | ATAPAEASAEPPVDSAASESESVSK     | A | 2 | 2277.0132 | 2277.0150 | 0.0018  | 0 | 0.78  | 5.206 | 0.621 | 0   | 1 | 27 | 44  | 2 | 0 | 1 |
| Q5V6N0_HALMA | 1 | Putative permease | pNG7110 | pNG7110 | 318 | 52.8 | 14 | 36 | 1      | R | ATAPAEASAEPPVDSAASESESVSK     | A | 2 | 2277.0132 | 2277.0213 | 0.0081  | 0 | 3.56  | 4.614 | 0.562 | 0   | 1 | 26 | 44  | 2 | 0 | 1 |
| Q5V6N0_HALMA | 1 | Putative permease | pNG7110 | pNG7110 | 318 | 52.8 | 14 | 36 | 1      | R | ATAPAEASAEPPVDSAASESESVSK     | A | 3 | 2277.0132 | 2277.0164 | 0.0032  | 0 | 1.41  | 3.068 | 0.327 | 0.1 | 1 | 27 | 88  | 2 | 0 | 1 |
| Q5V6N0_HALMA | 1 | Putative permease | pNG7110 | pNG7110 | 318 | 52.8 | 14 | 36 | 1      | R | ATAPAEASAEPPVDSAASESESVSK     | A | 2 | 2277.0132 | 2277.0116 | -0.0017 | 0 | -0.73 | 4.857 | 0.582 | 0   | 1 | 24 | 44  | 2 | 0 | 1 |
| Q5V6N0_HALMA | 1 | Putative permease | pNG7110 | pNG7110 | 318 | 52.8 | 14 | 36 | 0.9974 | R | ATAPAEASAEPPVDSAASESESVSK     | A | 2 | 2277.0132 | 2277.0157 | 0.0025  | 0 | 1.10  | 2.654 | 0.118 | 1   | 1 | 16 | 44  | 2 | 0 | 1 |
| Q5V6N0_HALMA | 1 | Putative permease | pNG7110 | pNG7110 | 318 | 52.8 | 14 | 36 | 0.9659 | R | ATAPAEASAEPPVDSAASESESVSK     | A | 2 | 2277.0132 | 2277.0206 | 0.0074  | 0 | 3.24  | 2.559 | 0.014 | 1.3 | 3 | 16 | 44  | 2 | 0 | 1 |
| Q5V6N0_HALMA | 1 | Putative permease | pNG7110 | pNG7110 | 318 | 52.8 | 14 | 36 | 1      | R | LNLDMPDTPDSLDLQDTAIENSEATTTR  | A | 2 | 2865.2822 | 2865.2933 | 0.0111  | 0 | 3.87  | 5.192 | 0.584 | 0   | 1 | 25 | 50  | 2 | 0 | 1 |
| Q5V6N0_HALMA | 1 | Putative permease | pNG7110 | pNG7110 | 318 | 52.8 | 14 | 36 | 1      | R | NEQAEDDDVETGVVEEQK            | G | 2 | 1933.8025 | 1933.8076 | 0.0051  | 0 | 2.62  | 4.263 | 0.267 | 0   | 1 | 24 | 32  | 2 | 0 | 1 |
| Q5V6N0_HALMA | 1 | Putative permease | pNG7110 | pNG7110 | 318 | 52.8 | 14 | 36 | 1      | R | NEQAEDDDVETGVVEEQK            | G | 2 | 1933.8025 | 1933.8092 | 0.0067  | 0 | 3.44  | 4.548 | 0.469 | 0   | 1 | 25 | 32  | 2 | 0 | 1 |
| Q5V6N0_HALMA | 1 | Putative permease | pNG7110 | pNG7110 | 318 | 52.8 | 14 | 36 | 1      | R | NEQAEDDDVETGVVEEQK            | G | 2 | 1933.8025 | 1933.8108 | 0.0082  | 0 | 4.26  | 4.272 | 0.519 | 0   | 1 | 24 | 32  | 2 | 0 | 1 |
| Q5V6N0_HALMA | 1 | Putative permease | pNG7110 | pNG7110 | 318 | 52.8 | 14 | 36 | 1      | R | NEQAEDDDVETGVVEEQK            | G | 2 | 1933.8025 | 1933.8075 | 0.0049  | 0 | 2.56  | 5.165 | 0.52  | 0   | 1 | 25 | 32  | 2 | 0 | 1 |
| Q5V6N0_HALMA | 1 | Putative permease | pNG7110 | pNG7110 | 318 | 52.8 | 14 | 36 | 1      | K | RLNLDMPDTPDSLDLQDTAIENSEATTTR | A | 3 | 3021.3833 | 3021.3889 | 0.0056  | 0 | 1.84  | 6.379 | 0.612 | 0   | 1 | 36 | 104 | 2 | 0 | 1 |
| Q5V6N0_HALMA | 1 | Putative permease | pNG7110 | pNG7110 | 318 | 52.8 | 14 | 36 | 1      | K | RLNLDMPDTPDSLDLQDTAIENSEATTTR | A | 3 | 3021.3833 | 3021.3982 | 0.0149  | 0 | 4.93  | 5.596 | 0.545 | 0   | 1 | 34 | 104 | 2 | 0 | 1 |
| Q5V6N0_HALMA | 1 | Putative permease | pNG7110 | pNG7110 | 318 | 52.8 | 14 | 36 | 1      | K | RLNLDMPDTPDSLDLQDTAIENSEATTTR | A | 3 | 3021.3833 | 3021.3891 | 0.0057  | 0 | 1.90  | 6.06  | 0.579 | 0   | 1 | 36 | 104 | 2 | 0 | 1 |
| Q5V6N0_HALMA | 1 | Putative permease | pNG7110 | pNG7110 | 318 | 52.8 | 14 | 36 | 0.9993 | K | RLNLDMPDTPDSLDLQDTAIENSEATTTR | A | 3 | 3021.3833 | 3021.4174 | 0.0341  | 0 | 11.29 | 3.259 | 0.201 | 0.6 | 6 | 25 | 104 | 2 | 0 | 1 |
| Q5V6N0_HALMA | 1 | Putative permease | pNG7110 | pNG7110 | 318 | 52.8 | 14 | 36 | 0.9991 | K | RLNLDMPDTPDSLDLQDTAIENSEATTTR | A | 3 | 3037.3833 | 3037.3623 | -0.0211 | 0 | -6.93 | 4.498 | 0.101 | 0   | 2 | 28 | 1   |   |   |   |





|                  |   |                                                                                                |           |           |     |      |    |    |        |   |                                         |   |   |           |           |         |         |       |       |       |     |   |    |     |   |   |   |
|------------------|---|------------------------------------------------------------------------------------------------|-----------|-----------|-----|------|----|----|--------|---|-----------------------------------------|---|---|-----------|-----------|---------|---------|-------|-------|-------|-----|---|----|-----|---|---|---|
| PYRD_HALMAReview | 1 | Dihydroorotate dehydrogenase (EC 1.3.3.1) (Dihydroorotate oxidase)(DHOdehase) (DHODase) (DHOD) | pyrD      | rrnAC2969 | 350 | 64.9 | 10 | 33 | 1      | K | LSPDLPEPAVEDALDLVTELDLDGVVATNTTTERPASLR | S | 3 | 4132.1063 | 4134.1282 | 2.0218  | -2.0067 | 3.67  | 4.223 | 0.538 | 0   | 1 | 40 | 152 | 2 | 0 | 1 |
| PYRD_HALMAReview | 1 | Dihydroorotate dehydrogenase (EC 1.3.3.1) (Dihydroorotate oxidase)(DHOdehase) (DHODase) (DHOD) | pyrD      | rrnAC2969 | 350 | 64.9 | 10 | 33 | 1      | K | LSPDLPEPAVEDALDLVTELDLDGVVATNTTTERPASLR | S | 4 | 4132.1063 | 4134.1309 | 2.0246  | -2.0067 | 4.32  | 5.048 | 0.339 | 0   | 1 | 45 | 228 | 2 | 0 | 1 |
| PYRD_HALMAReview | 1 | Dihydroorotate dehydrogenase (EC 1.3.3.1) (Dihydroorotate oxidase)(DHOdehase) (DHODase) (DHOD) | pyrD      | rrnAC2969 | 350 | 64.9 | 10 | 33 | 1      | K | LSPDLPEPAVEDALDLVTELDLDGVVATNTTTERPASLR | S | 3 | 4132.1063 | 4132.1299 | 0.0236  | 0       | 5.71  | 3.838 | 0.456 | 0   | 1 | 39 | 152 | 2 | 0 | 1 |
| PYRD_HALMAReview | 1 | Dihydroorotate dehydrogenase (EC 1.3.3.1) (Dihydroorotate oxidase)(DHOdehase) (DHODase) (DHOD) | pyrD      | rrnAC2969 | 350 | 64.9 | 10 | 33 | 1      | K | LSPDLPEPAVEDALDLVTELDLDGVVATNTTTERPASLR | S | 3 | 4132.1063 | 4133.1348 | 1.0285  | -1.0034 | 6.08  | 4.423 | 0.579 | 0   | 1 | 41 | 152 | 2 | 0 | 1 |
| PYRD_HALMAReview | 1 | Dihydroorotate dehydrogenase (EC 1.3.3.1) (Dihydroorotate oxidase)(DHOdehase) (DHODase) (DHOD) | pyrD      | rrnAC2969 | 350 | 64.9 | 10 | 33 | 1      | K | LSPDLPEPAVEDALDLVTELDLDGVVATNTTTERPASLR | S | 3 | 4132.1063 | 4132.1251 | 0.0188  | 0       | 4.55  | 4.207 | 0.488 | 0   | 1 | 42 | 152 | 2 | 0 | 1 |
| PYRD_HALMAReview | 1 | Dihydroorotate dehydrogenase (EC 1.3.3.1) (Dihydroorotate oxidase)(DHOdehase) (DHODase) (DHOD) | pyrD      | rrnAC2969 | 350 | 64.9 | 10 | 33 | 1      | K | LSPDLPEPAVEDALDLVTELDLDGVVATNTTTERPASLR | S | 3 | 4132.1063 | 4134.1282 | 2.0218  | -2.0067 | 3.67  | 3.649 | 0.434 | 0   | 1 | 38 | 152 | 2 | 0 | 1 |
| PYRD_HALMAReview | 1 | Dihydroorotate dehydrogenase (EC 1.3.3.1) (Dihydroorotate oxidase)(DHOdehase) (DHODase) (DHOD) | pyrD      | rrnAC2969 | 350 | 64.9 | 10 | 33 | 1      | K | LSPDLPEPAVEDALDLVTELDLDGVVATNTTTERPASLR | S | 4 | 4132.1063 | 4132.1340 | 0.0277  | 0       | 6.69  | 4.565 | 0.339 | 0.1 | 6 | 40 | 228 | 2 | 0 | 1 |
| PYRD_HALMAReview | 1 | Dihydroorotate dehydrogenase (EC 1.3.3.1) (Dihydroorotate oxidase)(DHOdehase) (DHODase) (DHOD) | pyrD      | rrnAC2969 | 350 | 64.9 | 10 | 33 | 0.9999 | K | LSPDLPEPAVEDALDLVTELDLDGVVATNTTTERPASLR | S | 4 | 4132.1063 | 4134.1309 | 2.0246  | -2.0067 | 4.32  | 3.745 | 0.245 | 0.4 | 2 | 42 | 228 | 2 | 0 | 1 |
| PYRD_HALMAReview | 1 | Dihydroorotate dehydrogenase (EC 1.3.3.1) (Dihydroorotate oxidase)(DHOdehase) (DHODase) (DHOD) | pyrD      | rrnAC2969 | 350 | 64.9 | 10 | 33 | 1      | - | MRPYDIAKPFLLSPAETANK                    | S | 3 | 2408.2562 | 2408.2686 | 0.0124  | 0       | 5.15  | 5.411 | 0.472 | 0   | 1 | 37 | 80  | 2 | 0 | 1 |
| PYRD_HALMAReview | 1 | Dihydroorotate dehydrogenase (EC 1.3.3.1) (Dihydroorotate oxidase)(DHOdehase) (DHODase) (DHOD) | pyrD      | rrnAC2969 | 350 | 64.9 | 10 | 33 | 1      | - | MRPYDIAKPFLLSPAETANK                    | S | 3 | 2408.2562 | 2408.2538 | -0.0024 | 0       | -1.00 | 5.269 | 0.409 | 0   | 1 | 37 | 80  | 2 | 0 | 1 |
| PYRD_HALMAReview | 1 | Dihydroorotate dehydrogenase (EC 1.3.3.1) (Dihydroorotate oxidase)(DHOdehase) (DHODase) (DHOD) | pyrD      | rrnAC2969 | 350 | 64.9 | 10 | 33 | 1      | K | NATIPETLASLGFGEVGGVTAEPQAGNARPR         | M | 3 | 3297.6742 | 3297.6758 | 0.0016  | 0       | 0.48  | 3.938 | 0.564 | 0   | 1 | 42 | 128 | 2 | 0 | 1 |
| PYRD_HALMAReview | 1 | Dihydroorotate dehydrogenase (EC 1.3.3.1) (Dihydroorotate oxidase)(DHOdehase) (DHODase) (DHOD) | pyrD      | rrnAC2969 | 350 | 64.9 | 10 | 33 | 1      | K | NATIPETLASLGFGEVGGVTAEPQAGNARPR         | M | 3 | 3297.6742 | 3297.6861 | 0.0118  | 0       | 3.59  | 3.663 | 0.53  | 0   | 1 | 40 | 128 | 2 | 0 | 1 |
| PYRD_HALMAReview | 1 | Dihydroorotate dehydrogenase (EC 1.3.3.1) (Dihydroorotate oxidase)(DHOdehase) (DHODase) (DHOD) | pyrD      | rrnAC2969 | 350 | 64.9 | 10 | 33 | 1      | R | SPNAVETGGLSGKPIENQATEMVR                | F | 3 | 2500.2278 | 2500.2242 | -0.0036 | 0       | -1.45 | 5.038 | 0.497 | 0   | 1 | 34 | 92  | 2 | 0 | 1 |
| Q5V3L2_HALMA     | 1 | Hypothetical protein                                                                           | rrnAC0915 | rrnAC0915 | 458 | 36.5 | 10 | 33 | 1      | D | PFNDFSQKQIEDFQNSDAQPPSVAHGLAAPPVAK      | S | 4 | 3636.7485 | 3636.7590 | 0.0105  | 0       | 2.88  | 6.3   | 0.503 | 0   | 1 | 54 | 198 | 1 | 1 | 1 |
| Q5V3L2_HALMA     | 1 | Hypothetical protein                                                                           | rrnAC0915 | rrnAC0915 | 458 | 36.5 | 10 | 33 | 1      | K | DAQAQAGNYVTVPLNIHR                      | I | 2 | 1934.9962 | 1935.0036 | 0.0074  |         |       |       |       |     |   |    |     |   |   |   |





|              |   |                                   |          |          |     |      |   |    |        |   |                                |   |   |           |           |         |         |        |       |       |     |    |    |     |   |   |   |
|--------------|---|-----------------------------------|----------|----------|-----|------|---|----|--------|---|--------------------------------|---|---|-----------|-----------|---------|---------|--------|-------|-------|-----|----|----|-----|---|---|---|
| Q5UYM1_HALMA | 1 | Hypothetical protein              | rmAC2885 | rmAC2885 | 181 | 66.3 | 6 | 29 | 1      | R | STDAAQGEDVDPAAEFRDIWLQSANAEAFK | H | 3 | 3109.4265 | 3109.4265 | 0.0000  | 0       | 0.00   | 5.53  | 0.521 | 0   | 1  | 39 | 108 | 2 | 1 | 1 |
| Q5UYM1_HALMA | 1 | Hypothetical protein              | rmAC2885 | rmAC2885 | 181 | 66.3 | 6 | 29 | 1      | R | STDAAQGEDVDPAAEFRDIWLQSANAEAFK | H | 3 | 3109.4265 | 3109.4324 | 0.0059  | 0       | 1.89   | 5.875 | 0.598 | 0   | 1  | 43 | 108 | 2 | 1 | 1 |
| Q5UYM1_HALMA | 1 | Hypothetical protein              | rmAC2885 | rmAC2885 | 181 | 66.3 | 6 | 29 | 0.9986 | R | STDAAQGEDVDPAAEFRDIWLQSANAEAFK | H | 3 | 3109.4265 | 3109.4405 | 0.0139  | 0       | 4.48   | 3.169 | 0.215 | 0.6 | 2  | 24 | 108 | 2 | 1 | 1 |
| Q5V269_HALMA | 1 | NADH dehydrogenase(oxidoreductase | ndhG3    | rmAC1458 | 516 | 13.8 | 6 | 29 | 0.9689 | R | VSEIAFQAAQQL                   | - | 2 | 1288.7027 | 1289.7054 | 1.0027  | -1.0034 | -0.49  | 2.512 | 0.143 | 0.2 | 12 | 13 | 22  | 2 | 0 | 1 |
| Q5V269_HALMA | 1 | NADH dehydrogenase(oxidoreductase | ndhG3    | rmAC1458 | 516 | 13.8 | 6 | 29 | 1      | K | AAGFVLAFR                      | A | 2 | 950.5338  | 950.5356  | 0.0017  | 0       | 1.82   | 3.342 | 0.436 | 0   | 1  | 15 | 16  | 2 | 0 | 1 |
| Q5V269_HALMA | 1 | NADH dehydrogenase(oxidoreductase | ndhG3    | rmAC1458 | 516 | 13.8 | 6 | 29 | 1      | K | AAGFVLAFR                      | A | 2 | 950.5338  | 950.5454  | 0.0116  | 0       | 12.23  | 2.594 | 0.4   | 0   | 1  | 15 | 16  | 2 | 0 | 1 |
| Q5V269_HALMA | 1 | NADH dehydrogenase(oxidoreductase | ndhG3    | rmAC1458 | 516 | 13.8 | 6 | 29 | 1      | K | AAGFVLAFR                      | A | 2 | 950.5338  | 950.5353  | 0.0015  | 0       | 1.57   | 3.358 | 0.428 | 0   | 1  | 15 | 16  | 2 | 0 | 1 |
| Q5V269_HALMA | 1 | NADH dehydrogenase(oxidoreductase | ndhG3    | rmAC1458 | 516 | 13.8 | 6 | 29 | 1      | K | AAGFVLAFR                      | A | 2 | 950.5338  | 950.5346  | 0.0008  | 0       | 0.80   | 3.309 | 0.416 | 0   | 1  | 15 | 16  | 2 | 0 | 1 |
| Q5V269_HALMA | 1 | NADH dehydrogenase(oxidoreductase | ndhG3    | rmAC1458 | 516 | 13.8 | 6 | 29 | 0.9997 | K | AAGFVLAFR                      | A | 2 | 950.5338  | 950.5254  | -0.0084 | 0       | -8.81  | 2.63  | 0.174 | 0   | 1  | 15 | 16  | 2 | 0 | 1 |
| Q5V269_HALMA | 1 | NADH dehydrogenase(oxidoreductase | ndhG3    | rmAC1458 | 516 | 13.8 | 6 | 29 | 0.9995 | K | AAGFVLAFR                      | A | 2 | 950.5338  | 950.5454  | 0.0116  | 0       | 12.23  | 2.254 | 0.235 | 0   | 2  | 13 | 16  | 2 | 0 | 1 |
| Q5V269_HALMA | 1 | NADH dehydrogenase(oxidoreductase | ndhG3    | rmAC1458 | 516 | 13.8 | 6 | 29 | 0.9998 | R | FEDYNGLGK                      | E | 2 | 1041.4767 | 1041.4854 | 0.0087  | 0       | 8.38   | 2.205 | 0.302 | 0.4 | 3  | 13 | 16  | 2 | 0 | 1 |
| Q5V269_HALMA | 1 | NADH dehydrogenase(oxidoreductase | ndhG3    | rmAC1458 | 516 | 13.8 | 6 | 29 | 0.9996 | R | FEDYNGLGK                      | E | 2 | 1041.4767 | 1041.4791 | 0.0024  | 0       | 2.28   | 2.174 | 0.292 | 0.2 | 5  | 12 | 16  | 2 | 0 | 1 |
| Q5V269_HALMA | 1 | NADH dehydrogenase(oxidoreductase | ndhG3    | rmAC1458 | 516 | 13.8 | 6 | 29 | 0.9585 | R | RFEDYNGLGK                     | E | 2 | 1197.5778 | 1198.5654 | 0.9876  | -1.0034 | -13.13 | 2.303 | 0.073 | 0.9 | 1  | 15 | 18  | 2 | 0 | 1 |
| Q5V269_HALMA | 1 | NADH dehydrogenase(oxidoreductase | ndhG3    | rmAC1458 | 516 | 13.8 | 6 | 29 | 0.9366 | R | RFEDYNGLGK                     | E | 3 | 1197.5778 | 1198.7782 | 1.2003  | -1.0034 | 164.50 | 2.491 | 0.108 | 1.2 | 73 | 17 | 36  | 2 | 0 | 1 |
| Q5V269_HALMA | 1 | NADH dehydrogenase(oxidoreductase | ndhG3    | rmAC1458 | 516 | 13.8 | 6 | 29 | 0.9251 | R | RFEDYNGLGK                     | E | 2 | 1197.5778 | 1198.5615 | 0.9837  | -1.0034 | -16.43 | 2.273 | 0.043 | 1.2 | 1  | 16 | 18  | 2 | 0 | 1 |
| Q5V269_HALMA | 1 | NADH dehydrogenase(oxidoreductase | ndhG3    | rmAC1458 | 516 | 13.8 | 6 | 29 | 0.9211 | R | RFEDYNGLGK                     | E | 2 | 1197.5778 | 1198.5633 | 0.9855  | -1.0034 | -14.90 | 2.152 | 0.063 | 1.5 | 1  | 15 | 18  | 2 | 0 | 1 |
| Q5V269_HALMA | 1 | NADH dehydrogenase(oxidoreductase | ndhG3    | rmAC1458 | 516 | 13.8 | 6 | 29 | 1      | K | TASVPFHFWAPEAYEGAPAPISAFLSSASK | A | 3 | 3135.5342 | 3135.5370 | 0.00    |         |        |       |       |     |    |    |     |   |   |   |

|              |   |                                              |             |          |     |      |   |    |        |   |                            |   |   |           |           |         |         |         |       |       |     |    |    |     |   |   |   |
|--------------|---|----------------------------------------------|-------------|----------|-----|------|---|----|--------|---|----------------------------|---|---|-----------|-----------|---------|---------|---------|-------|-------|-----|----|----|-----|---|---|---|
| YMB4_HALMA   | 1 | Na <sup>+</sup> /H <sup>+</sup> - antiporter | <i>nhaA</i> | rmAC0229 | 517 | 14.1 | 8 | 29 | 0.9965 | R | YNN5YR                     | R | 2 | 928.4403  | 928.9454  | 0.5051  | -1.0034 | -536.63 | 2.174 | 0.272 | 0   | 18 | 10 | 12  | 2 | 0 | 1 |
| Q5UZC2_HALMA | 1 | Carbon starvation protein CstA               | <i>cstA</i> | rmAC2590 | 631 | 7.9  | 5 | 28 | 1      | R | YMMEEIVGLR                 | A | 2 | 1271.5991 | 1271.5891 | -0.0100 | 0       | -7.89   | 2.599 | 0.353 | 0   | 1  | 16 | 18  | 2 | 0 | 1 |
| Q5UZC2_HALMA | 1 | Carbon starvation protein CstA               | <i>cstA</i> | rmAC2590 | 631 | 7.9  | 5 | 28 | 1      | R | AGETASGFNVGGGIR            | S | 2 | 1391.6793 | 1391.6854 | 0.0061  | 0       | 4.40    | 3.016 | 0.401 | 0   | 1  | 20 | 28  | 2 | 0 | 1 |
| Q5UZC2_HALMA | 1 | Carbon starvation protein CstA               | <i>cstA</i> | rmAC2590 | 631 | 7.9  | 5 | 28 | 1      | R | AGETASGFNVGGGIR            | S | 2 | 1391.6793 | 1391.6804 | 0.0011  | 0       | 0.77    | 4.049 | 0.491 | 0   | 1  | 23 | 28  | 2 | 0 | 1 |
| Q5UZC2_HALMA | 1 | Carbon starvation protein CstA               | <i>cstA</i> | rmAC2590 | 631 | 7.9  | 5 | 28 | 1      | R | AGETASGFNVGGGIR            | S | 2 | 1391.6793 | 1391.6800 | 0.0007  | 0       | 0.51    | 3.928 | 0.484 | 0   | 1  | 23 | 28  | 2 | 0 | 1 |
| Q5UZC2_HALMA | 1 | Carbon starvation protein CstA               | <i>cstA</i> | rmAC2590 | 631 | 7.9  | 5 | 28 | 1      | R | AGETASGFNVGGGIR            | S | 2 | 1391.6793 | 1391.6811 | 0.0018  | 0       | 1.29    | 3.972 | 0.435 | 0   | 1  | 23 | 28  | 2 | 0 | 1 |
| Q5UZC2_HALMA | 1 | Carbon starvation protein CstA               | <i>cstA</i> | rmAC2590 | 631 | 7.9  | 5 | 28 | 1      | R | AGETASGFNVGGGIR            | S | 2 | 1391.6793 | 1391.6799 | 0.0006  | 0       | 0.42    | 3.844 | 0.474 | 0   | 1  | 24 | 28  | 2 | 0 | 1 |
| Q5UZC2_HALMA | 1 | Carbon starvation protein CstA               | <i>cstA</i> | rmAC2590 | 631 | 7.9  | 5 | 28 | 0.9998 | R | AGETASGFNVGGGIR            | S | 2 | 1391.6793 | 1391.6814 | 0.0020  | 0       | 1.47    | 3.369 | 0.183 | 0.1 | 1  | 21 | 28  | 2 | 0 | 1 |
| Q5UZC2_HALMA | 1 | Carbon starvation protein CstA               | <i>cstA</i> | rmAC2590 | 631 | 7.9  | 5 | 28 | 1      | R | FLELDDDDNETPAHK            | Y | 2 | 1642.7475 | 1642.7467 | -0.0008 | 0       | -0.51   | 4.349 | 0.469 | 0   | 1  | 22 | 26  | 2 | 0 | 1 |
| Q5UZC2_HALMA | 1 | Carbon starvation protein CstA               | <i>cstA</i> | rmAC2590 | 631 | 7.9  | 5 | 28 | 1      | R | FLELDDDDNETPAHK            | Y | 3 | 1642.7475 | 1642.7461 | -0.0015 | 0       | -0.89   | 3.643 | 0.381 | 0   | 1  | 26 | 52  | 2 | 0 | 1 |
| Q5UZC2_HALMA | 1 | Carbon starvation protein CstA               | <i>cstA</i> | rmAC2590 | 631 | 7.9  | 5 | 28 | 0.9999 | R | FLELDDDDNETPAHK            | Y | 3 | 1642.7475 | 1643.7382 | 0.9906  | -1.0034 | -7.73   | 2.466 | 0.313 | 0.1 | 1  | 25 | 52  | 2 | 0 | 1 |
| Q5UZC2_HALMA | 1 | Carbon starvation protein CstA               | <i>cstA</i> | rmAC2590 | 631 | 7.9  | 5 | 28 | 0.9995 | R | FLELDDDDNETPAHK            | Y | 3 | 1642.7475 | 1642.7464 | -0.0011 | 0       | -0.67   | 2.494 | 0.205 | 0.2 | 1  | 25 | 52  | 2 | 0 | 1 |
| Q5UZC2_HALMA | 1 | Carbon starvation protein CstA               | <i>cstA</i> | rmAC2590 | 631 | 7.9  | 5 | 28 | 0.9975 | R | FLELDDDDNETPAHK            | Y | 3 | 1642.7475 | 1642.7472 | -0.0004 | 0       | -0.23   | 2.549 | 0.139 | 0.1 | 1  | 24 | 52  | 2 | 0 | 1 |
| Q5UZC2_HALMA | 1 | Carbon starvation protein CstA               | <i>cstA</i> | rmAC2590 | 631 | 7.9  | 5 | 28 | 1      | R | FLELDDDDNETPAHKYEDGQEYVPSK | K | 3 | 2938.3145 | 2938.3136 | -0.0010 | 0       | -0.33   | 6.161 | 0.546 | 0   | 1  | 41 | 96  | 2 | 1 | 1 |
| Q5UZC2_HALMA | 1 | Carbon starvation protein CstA               | <i>cstA</i> | rmAC2590 | 631 | 7.9  | 5 | 28 | 1      | R | FLELDDDDNETPAHKYEDGQEYVPSK | K | 3 | 2938.3145 | 2939.3182 | 1.0036  | -1.0034 | 0.10    | 5.095 | 0.475 | 0   | 1  | 36 | 96  | 2 | 1 | 1 |
| Q5UZC2_HALMA | 1 | Carbon starvation protein CstA               | <i>cstA</i> | rmAC2590 | 631 | 7.9  | 5 | 28 | 1      | R | FLELDDDDNETPAHKYEDGQEYVPSK | K | 4 | 2938.3145 | 2938.3168 | 0.0023  | 0       | 0.79    | 3.673 | 0.329 | 0   | 1  | 41 | 144 | 2 | 1 | 1 |
| Q5UZC2_HALMA | 1 | Carbon starvation protein CstA               | <i>cstA</i> | rmAC2590 | 631 | 7.9  | 5 | 28 | 1      | R | FLELDDDDNETPAHKYEDGQEYVPSK | K | 4 | 2938.3145 | 2938.3207 | 0.0062  | 0</     |         |       |       |     |    |    |     |   |   |   |









|                  |   |                                            |          |          |     |      |    |    |        |   |                                              |   |   |           |           |         |         |       |       |       |     |   |    |     |   |   |   |
|------------------|---|--------------------------------------------|----------|----------|-----|------|----|----|--------|---|----------------------------------------------|---|---|-----------|-----------|---------|---------|-------|-------|-------|-----|---|----|-----|---|---|---|
| Q5V5P4_HALMA     | 1 | Hypothetical protein                       | rmAC0079 | rmAC0079 | 496 | 38.5 | 15 | 23 | 1      | R | LLDESGAADTSGGPR                              | T | 2 | 1444.6794 | 1442.6854 | -1.9940 | 2       | 4.14  | 4.438 | 0.518 | 0   | 1 | 25 | 28  | 2 | 0 | 1 |
| Q5V5P4_HALMA     | 1 | Hypothetical protein                       | rmAC0079 | rmAC0079 | 496 | 38.5 | 15 | 23 | 1      | R | LLDESGAADTSGGPR                              | T | 2 | 1444.6794 | 1444.6769 | -0.0026 | 0       | -1.78 | 4.51  | 0.522 | 0   | 1 | 25 | 28  | 2 | 0 | 1 |
| Q5V5P4_HALMA     | 1 | Hypothetical protein                       | rmAC0079 | rmAC0079 | 496 | 38.5 | 15 | 23 | 1      | R | LLDESGAADTSGGPR                              | T | 2 | 1444.6794 | 1444.6780 | -0.0015 | 0       | -1.02 | 4.738 | 0.542 | 0   | 1 | 25 | 28  | 2 | 0 | 1 |
| Q5V5P4_HALMA     | 1 | Hypothetical protein                       | rmAC0079 | rmAC0079 | 496 | 38.5 | 15 | 23 | 0.9581 | D | PAAAEPAATGESDVSEPVADSEPNNTDSAGDSGIHAPAAQQHSD | P | 3 | 4013.7271 | 4014.7223 | 0.9952  | -1.0034 | -2.03 | 3.377 | 0.469 | 0   | 1 | 33 | 160 | 0 | 0 | 1 |
| Q5V5P4_HALMA     | 1 | Hypothetical protein                       | rmAC0079 | rmAC0079 | 496 | 38.5 | 15 | 23 | 1      | K | SDDPMPPESTEPEPAVSR                           | D | 2 | 1842.7941 | 1842.7956 | 0.0015  | 0       | 0.82  | 5.039 | 0.485 | 0   | 1 | 26 | 32  | 2 | 0 | 1 |
| Q5V5P4_HALMA     | 1 | Hypothetical protein                       | rmAC0079 | rmAC0079 | 496 | 38.5 | 15 | 23 | 1      | K | SDDPMPPESTEPEPAVSR                           | D | 2 | 1842.7941 | 1842.7973 | 0.0032  | 0       | 1.74  | 4.601 | 0.49  | 0   | 1 | 26 | 32  | 2 | 0 | 1 |
| Q5V5P4_HALMA     | 1 | Hypothetical protein                       | rmAC0079 | rmAC0079 | 496 | 38.5 | 15 | 23 | 1      | K | SDDPMPPESTEPEPAVSR                           | D | 2 | 1842.7941 | 1842.7954 | 0.0013  | 0       | 0.68  | 4.251 | 0.284 | 0.1 | 1 | 23 | 32  | 2 | 0 | 1 |
| Q5V5P4_HALMA     | 1 | Hypothetical protein                       | rmAC0079 | rmAC0079 | 496 | 38.5 | 15 | 23 | 1      | K | SDDPMPPESTEPEPAVSR                           | D | 2 | 1858.7941 | 1858.7888 | -0.0053 | 0       | -2.87 | 4.845 | 0.466 | 0   | 1 | 22 | 32  | 2 | 0 | 1 |
| Q5V5P4_HALMA     | 1 | Hypothetical protein                       | rmAC0079 | rmAC0079 | 496 | 38.5 | 15 | 23 | 1      | K | SDDPMPPESTEPEPAVSR                           | D | 2 | 1842.7941 | 1842.7942 | 0.0000  | 0       | 0.02  | 4.693 | 0.493 | 0   | 1 | 27 | 32  | 2 | 0 | 1 |
| Q5V5P4_HALMA     | 1 | Hypothetical protein                       | rmAC0079 | rmAC0079 | 496 | 38.5 | 15 | 23 | 1      | K | SDDPMPPESTEPEPAVSR                           | D | 2 | 1842.7941 | 1842.7943 | 0.0002  | 0       | 0.09  | 4.824 | 0.49  | 0   | 1 | 27 | 32  | 2 | 0 | 1 |
| Q5V5P4_HALMA     | 1 | Hypothetical protein                       | rmAC0079 | rmAC0079 | 496 | 38.5 | 15 | 23 | 1      | K | SDDPMPPESTEPEPAVSR                           | D | 2 | 1858.7941 | 1858.7937 | -0.0004 | 0       | -0.24 | 4.07  | 0.504 | 0   | 1 | 24 | 32  | 2 | 0 | 1 |
| Q5V5P4_HALMA     | 1 | Hypothetical protein                       | rmAC0079 | rmAC0079 | 496 | 38.5 | 15 | 23 | 0.9998 | D | TTAEPSPADLAGDSETVPEPR                        | S | 2 | 2041.9440 | 2042.9654 | 1.0214  | -1.0034 | 8.85  | 4.447 | 0.439 | 0   | 1 | 23 | 38  | 1 | 0 | 1 |
| RL14_HALMAReview | 1 | 50S ribosomal protein L14P (Hmal14) (HI27) | rp14p    | rmAC1602 | 132 | 58.3 | 8  | 23 | 1      | K | AGLGDGKITVSVTK                               | G | 3 | 1287.7398 | 1287.7429 | 0.0031  | 0       | 2.40  | 3.036 | 0.309 | 0   | 1 | 28 | 48  | 2 | 1 | 1 |
| RL14_HALMAReview | 1 | 50S ribosomal protein L14P (Hmal14) (HI27) | rp14p    | rmAC1602 | 132 | 58.3 | 8  | 23 | 1      | K | AGLGDGKITVSVTK                               | G | 2 | 1287.7398 | 1287.7403 | 0.0005  | 0       | 0.39  | 3.691 | 0.33  | 0   | 1 | 20 | 24  | 2 | 1 | 1 |
| RL14_HALMAReview | 1 | 50S ribosomal protein L14P (Hmal14) (HI27) | rp14p    | rmAC1602 | 132 | 58.3 | 8  | 23 | 1      | K | AGLGDGKITVSVTK                               | G | 3 | 1287.7398 | 1287.7425 | 0.0027  | 0       | 2.11  | 3.31  | 0.314 | 0   | 1 | 25 | 48  | 2 | 1 | 1 |
| RL14_HALMAReview | 1 | 50S ribosomal protein L14P (Hmal14) (HI27) | rp14p    | rmAC1602 | 132 | 58.3 | 8  | 23 | 1      | K | AGLGDGKITVSVTK                               | G | 3 | 1287.7398 | 1287.7395 | -0.0003 | 0       | -0.23 | 3.374 | 0.36  | 0   | 1 | 25 | 48  | 2 | 1 | 1 |
| RL14_HALMAReview | 1 | 50S ribosomal protein L14P (Hmal14) (HI27) | rp14p    | rmAC1602 | 132 | 58.3 | 8  | 23 | 1      | K | AGLGDGKITVSVTK                               | G | 3 | 1287.7398 | 1287.7399 | 0.0001  | 0       | 0.05  | 3.857 | 0.357 |     |   |    |     |   |   |   |



|              |   |                                           |       |          |     |      |    |    |        |   |                                   |   |   |           |           |         |         |       |       |       |     |     |    |     |   |   |   |
|--------------|---|-------------------------------------------|-------|----------|-----|------|----|----|--------|---|-----------------------------------|---|---|-----------|-----------|---------|---------|-------|-------|-------|-----|-----|----|-----|---|---|---|
| Q5V515_HALMA | 1 | Thiamine-binding periplasmic protein-like | tpaA  | rmAC0147 | 374 | 35.6 | 8  | 22 | 0.9996 | K | QRFEFEEDFAR                       | L | 3 | 1325.6000 | 1325.6018 | 0.0018  | 0       | 1.34  | 2.899 | 0.223 | 0.4 | 2   | 21 | 36  | 2 | 1 | 1 |
| Q5V515_HALMA | 1 | Thiamine-binding periplasmic protein-like | tpaA  | rmAC0147 | 374 | 35.6 | 8  | 22 | 1      | R | VDENLDDGLFADVGDVAGQDDIK           | S | 3 | 2419.1027 | 2420.1082 | 1.0054  | -1.0034 | 0.87  | 6.009 | 0.419 | 0   | 1   | 37 | 88  | 2 | 0 | 1 |
| Q5V515_HALMA | 1 | Thiamine-binding periplasmic protein-like | tpaA  | rmAC0147 | 374 | 35.6 | 8  | 22 | 1      | R | VDENLDDGLFADVGDVAGQDDIK           | S | 2 | 2419.1027 | 2419.1075 | 0.0048  | 0       | 1.98  | 5.969 | 0.58  | 0   | 1   | 28 | 44  | 2 | 0 | 1 |
| Q5V515_HALMA | 1 | Thiamine-binding periplasmic protein-like | tpaA  | rmAC0147 | 374 | 35.6 | 8  | 22 | 1      | R | VDENLDDGLFADVGDVAGQDDIK           | S | 2 | 2419.1027 | 2419.1100 | 0.0024  | 0       | 0.97  | 4.967 | 0.558 | 0   | 1   | 23 | 44  | 2 | 0 | 1 |
| Q5V515_HALMA | 1 | Thiamine-binding periplasmic protein-like | tpaA  | rmAC0147 | 374 | 35.6 | 8  | 22 | 1      | R | VDENLDDGLFADVGDVAGQDDIK           | S | 2 | 2419.1027 | 2419.1100 | 0.0072  | 0       | 2.99  | 5.483 | 0.356 | 0   | 1   | 27 | 44  | 2 | 0 | 1 |
| Q5V614_HALMA | 1 | Copper-binding protein                    | nosD1 | pNG7150  | 637 | 28.4 | 10 | 22 | 1      | R | SYIAHNVVVDTTQAMSTNADR             | S | 2 | 2308.0804 | 2309.0654 | 0.9850  | -1.0034 | -7.94 | 4.222 | 0.384 | 0   | 1   | 19 | 40  | 2 | 0 | 1 |
| Q5V614_HALMA | 1 | Copper-binding protein                    | nosD1 | pNG7150  | 637 | 28.4 | 10 | 22 | 1      | R | FGVHLMYTSR                        | S | 3 | 1209.5964 | 1209.5962 | -0.0002 | 0       | -0.15 | 3.405 | 0.388 | 0   | 1   | 21 | 36  | 2 | 0 | 1 |
| Q5V614_HALMA | 1 | Copper-binding protein                    | nosD1 | pNG7150  | 637 | 28.4 | 10 | 22 | 1      | R | FGVHLMYTSR                        | S | 3 | 1209.5964 | 1209.5989 | 0.0025  | 0       | 2.05  | 4.192 | 0.443 | 0   | 1   | 24 | 36  | 2 | 0 | 1 |
| Q5V614_HALMA | 1 | Copper-binding protein                    | nosD1 | pNG7150  | 637 | 28.4 | 10 | 22 | 1      | R | FGVHLMYTSR                        | S | 3 | 1225.5964 | 1225.5924 | -0.0040 | 0       | -3.26 | 3.177 | 0.444 | 0   | 1   | 20 | 36  | 2 | 0 | 1 |
| Q5V614_HALMA | 1 | Copper-binding protein                    | nosD1 | pNG7150  | 637 | 28.4 | 10 | 22 | 0.9999 | R | FGVHLMYTSR                        | S | 2 | 1209.5964 | 1209.5991 | 0.0027  | 0       | 2.21  | 2.503 | 0.313 | 0   | 1   | 15 | 18  | 2 | 0 | 1 |
| Q5V614_HALMA | 1 | Copper-binding protein                    | nosD1 | pNG7150  | 637 | 28.4 | 10 | 22 | 0.9997 | R | FGVHLMYTSR                        | S | 3 | 1209.5964 | 1209.6682 | 0.0717  | 0       | 59.31 | 1.998 | 0.328 | 0.4 | 24  | 14 | 36  | 2 | 0 | 1 |
| Q5V614_HALMA | 1 | Copper-binding protein                    | nosD1 | pNG7150  | 637 | 28.4 | 10 | 22 | 0.9977 | R | FGVHLMYTSR                        | S | 3 | 1209.5964 | 1209.6082 | 0.0117  | 0       | 9.71  | 2.219 | 0.235 | 0.3 | 68  | 14 | 36  | 2 | 0 | 1 |
| Q5V614_HALMA | 1 | Copper-binding protein                    | nosD1 | pNG7150  | 637 | 28.4 | 10 | 22 | 0.9103 | R | FGVHLMYTSR                        | S | 3 | 1209.5964 | 1209.6382 | 0.0417  | 0       | 34.51 | 2.316 | 0.066 | 4.5 | 232 | 11 | 36  | 2 | 0 | 1 |
| Q5V614_HALMA | 1 | Copper-binding protein                    | nosD1 | pNG7150  | 637 | 28.4 | 10 | 22 | 1      | R | GNYSWGSAGYDLTGGTGPVLAQSYSPDTSVDRR | L | 3 | 3289.5276 | 3289.5569 | 0.0293  | 0       | 8.90  | 5.33  | 0.555 | 0   | 1   | 40 | 120 | 2 | 0 | 1 |
| Q5V614_HALMA | 1 | Copper-binding protein                    | nosD1 | pNG7150  | 637 | 28.4 | 10 | 22 | 0.9995 | R | LHQ2TDAAVVLR                      | A | 2 | 1221.6829 | 1221.6836 | 0.0006  | 0       | 0.53  | 2.619 | 0.183 | 0   | 1   | 17 | 20  | 2 | 0 | 1 |
| Q5V614_HALMA | 1 | Copper-binding protein                    | nosD1 | pNG7150  | 637 | 28.4 | 10 | 22 | 0.9957 | R | RGSIVDRAPLADPANPETVRR             | L | 4 | 2289.2302 | 2289.2307 | 0.0004  | 0       | 0.19  | 2.557 | 0.23  | 0.1 | 66  | 34 | 120 | 2 | 1 | 1 |
| Q5V614_HALMA | 1 | Copper-binding protein                    | nosD1 | pNG7150  | 637 | 28.4 | 10 | 22 | 1      | R | RLHQ2TDAAVVLR                     | A | 3 | 1377.7841 | 1377.7853 | 0.0012  | 0       | 0.85  | 5.048 | 0.442 | 0   | 1   | 31 | 44  | 2 | 0 | 1 |
| Q5V6         |   |                                           |       |          |     |      |    |    |        |   |                                   |   |   |           |           |         |         |       |       |       |     |     |    |     |   |   |   |

[illegible]

|              |   |                              |          |          |     |      |    |    |        |   |                              |   |   |           |           |         |         |        |       |       |     |   |    |     |   |   |   |
|--------------|---|------------------------------|----------|----------|-----|------|----|----|--------|---|------------------------------|---|---|-----------|-----------|---------|---------|--------|-------|-------|-----|---|----|-----|---|---|---|
| Q5V207_HALMA | 1 | Hypothetical protein         | rmAC1525 | rmAC1525 | 380 | 38.4 | 12 | 20 | 1      | R | SDIETVADKYGAMQVQHAHVR        | F | 3 | 2354.1437 | 2354.1447 | 0.0010  | 0       | 0.40   | 5.43  | 0.374 | 0   | 1 | 40 | 80  | 2 | 1 | 1 |
| Q5V207_HALMA | 1 | Hypothetical protein         | rmAC1525 | rmAC1525 | 380 | 38.4 | 12 | 20 | 1      | R | TNKGQAAGSGEGYGAETAFNVALDKLER | N | 4 | 2853.3893 | 2853.3955 | 0.0061  | 0       | 2.15   | 3.671 | 0.322 | 0.2 | 1 | 44 | 162 | 2 | 2 | 1 |
| Q5V207_HALMA | 1 | Hypothetical protein         | rmAC1525 | rmAC1525 | 380 | 38.4 | 12 | 20 | 1      | R | VLDMPVYDVMSSPVETAK           | L | 2 | 1979.9584 | 1980.9654 | 1.0070  | -1.0034 | 1.86   | 4.923 | 0.494 | 0   | 1 | 26 | 34  | 2 | 0 | 1 |
| Q5V3E3_HALMA | 1 | Sensor protein (EC 2.7.13.3) | hitD     | rmAC0991 | 644 | 15.7 | 9  | 20 | 0.9992 | R | VLDMPVYDVMSSPVETAK           | L | 2 | 2011.9584 | 2013.8915 | 1.9330  | -2.0067 | -36.62 | 2.66  | 0.293 | 0.1 | 1 | 16 | 34  | 2 | 0 | 1 |
| Q5V3E3_HALMA | 1 | Sensor protein (EC 2.7.13.3) | hitD     | rmAC0991 | 644 | 15.7 | 9  | 20 | 0.9998 | R | ATNLLADPFVEGIVLNSR           | D | 3 | 1928.0367 | 1928.0182 | -0.0186 | 0       | -9.62  | 2.985 | 0.237 | 0.4 | 3 | 25 | 68  | 2 | 0 | 1 |
| Q5V3E3_HALMA | 1 | Sensor protein (EC 2.7.13.3) | hitD     | rmAC0991 | 644 | 15.7 | 9  | 20 | 1      | R | ATNLLADPFVEGIVLNSR           | D | 3 | 1928.0367 | 1928.0482 | 0.0114  | 0       | 5.94   | 3.724 | 0.277 | 0   | 1 | 32 | 68  | 2 | 0 | 1 |
| Q5V3E3_HALMA | 1 | Sensor protein (EC 2.7.13.3) | hitD     | rmAC0991 | 644 | 15.7 | 9  | 20 | 0.9990 | R | ATNLLADPFVEGIVLNSRDVTEQLQR   | K | 3 | 2897.5247 | 2897.5330 | 0.0083  | 0       | 2.87   | 2.623 | 0.256 | 0.1 | 1 | 27 | 100 | 2 | 1 | 1 |
| Q5V3E3_HALMA | 1 | Sensor protein (EC 2.7.13.3) | hitD     | rmAC0991 | 644 | 15.7 | 9  | 20 | 1      | R | HTLVEEMADPVFVVDKDER          | L | 4 | 2228.0783 | 2228.0815 | 0.0032  | 0       | 1.42   | 3.012 | 0.267 | 0.1 | 1 | 37 | 108 | 2 | 1 | 1 |
| Q5V3E3_HALMA | 1 | Sensor protein (EC 2.7.13.3) | hitD     | rmAC0991 | 644 | 15.7 | 9  | 20 | 1      | R | HTLVEEMADPVFVVDKDER          | L | 3 | 2228.0783 | 2228.0819 | 0.0035  | 0       | 1.59   | 5.364 | 0.424 | 0   | 1 | 39 | 72  | 2 | 1 | 1 |
| Q5V3E3_HALMA | 1 | Sensor protein (EC 2.7.13.3) | hitD     | rmAC0991 | 644 | 15.7 | 9  | 20 | 1      | R | HTLVEEMADPVFVVDKDER          | L | 3 | 2228.0783 | 2228.0923 | 0.0140  | 0       | 6.28   | 5.404 | 0.438 | 0   | 1 | 39 | 72  | 2 | 1 | 1 |
| Q5V3E3_HALMA | 1 | Sensor protein (EC 2.7.13.3) | hitD     | rmAC0991 | 644 | 15.7 | 9  | 20 | 1      | R | HTLVEEMADPVFVVDKDER          | L | 4 | 2228.0783 | 2228.0849 | 0.0066  | 0       | 2.96   | 3.909 | 0.392 | 0   | 1 | 38 | 108 | 2 | 1 | 1 |
| Q5V3E3_HALMA | 1 | Sensor protein (EC 2.7.13.3) | hitD     | rmAC0991 | 644 | 15.7 | 9  | 20 | 1      | K | ILGYEPTLVGENVIEYIHPDDRR      | D | 4 | 2826.4188 | 2826.4250 | 0.0062  | 0       | 2.18   | 5.021 | 0.47  | 0   | 1 | 53 | 138 | 2 | 0 | 1 |
| Q5V3E3_HALMA | 1 | Sensor protein (EC 2.7.13.3) | hitD     | rmAC0991 | 644 | 15.7 | 9  | 20 | 1      | K | ILGYEPTLVGENVIEYIHPDDRR      | D | 4 | 2826.4188 | 2826.4274 | 0.0086  | 0       | 3.05   | 5.524 | 0.473 | 0   | 1 | 53 | 138 | 2 | 0 | 1 |
| Q5V3E3_HALMA | 1 | Sensor protein (EC 2.7.13.3) | hitD     | rmAC0991 | 644 | 15.7 | 9  | 20 | 1      | K | ILGYEPTLVGENVIEYIHPDDRR      | D | 4 | 2826.4188 | 2826.4228 | 0.0040  | 0       | 1.41   | 5.017 | 0.49  | 0   | 1 | 57 | 138 | 2 | 0 | 1 |
| Q5V3E3_HALMA | 1 | Sensor protein (EC 2.7.13.3) | hitD     | rmAC0991 | 644 | 15.7 | 9  | 20 | 0.9400 | R | LDQFASIVAHDLR                | N | 3 | 1483.7783 | 1483.7782 | -0.0002 | 0       | -0.10  | 2.292 | 0.011 | 1.9 | 1 | 23 | 48  | 2 | 0 | 1 |
| Q5V3E3_HALMA | 1 | Sensor protein (EC 2.7.13.3) | hitD     | rmAC0991 | 644 | 15.7 | 9  | 20 | 1      | R | LDQFASIVAHDLRNLNPNVASGR      | L | 4 | 2392.2611 | 2392.2697 | 0.0086  | 0       | 3.59   | 3.376 | 0.333 | 0   | 1 | 43 | 126 | 2 | 1 | 1 |
| Q5V3E3_HALMA | 1 | Sensor protein (EC 2.7.13.3) | hitD     | rmAC0991 | 644 | 15.7 | 9  | 20 | 1      | R | LDQFASIVAHDLRNL              |   |   |           |           |         |         |        |       |       |     |   |    |     |   |   |   |

[illegible]





|              |   |                           |       |          |      |      |   |    |        |   |                         |   |   |           |           |         |         |         |       |       |     |    |    |     |   |     |   |
|--------------|---|---------------------------|-------|----------|------|------|---|----|--------|---|-------------------------|---|---|-----------|-----------|---------|---------|---------|-------|-------|-----|----|----|-----|---|-----|---|
| Q5UZZ6_HALMA | 1 | Putative oxidoreductase   | gltD  | rmAC2334 | 1021 | 14.8 | 9 | 16 | 0.9999 | K | AIGAILFDQIGESR          | G | 2 | 1488.7936 | 1489.5054 | 0.7118  | -1.0034 | -195.81 | 2.805 | 0.389 | 0.1 | 1  | 19 | 26  | 2 | 0   | 1 |
| Q5UZZ6_HALMA | 1 | Putative oxidoreductase   | gltD2 | rmAC2334 | 1021 | 14.8 | 9 | 16 | 1      | R | IDPSADEVSNYDYQNETVAR    | S | 2 | 2285.0084 | 2286.0254 | 1.0170  | -1.0034 | 5.98    | 5.742 | 0.569 | 0   | 1  | 24 | 38  | 2 | 0   | 1 |
| Q5UZZ6_HALMA | 1 | Putative oxidoreductase   | gltD2 | rmAC2334 | 1021 | 14.8 | 9 | 16 | 1      | R | IDPSADEVSNYDYQNETVAR    | S | 2 | 2285.0084 | 2286.0157 | 1.0073  | -1.0034 | 1.73    | 5.609 | 0.565 | 0   | 1  | 26 | 38  | 2 | 0   | 1 |
| Q5UZZ6_HALMA | 1 | Putative oxidoreductase   | gltD2 | rmAC2334 | 1021 | 14.8 | 9 | 16 | 0.9449 | R | ILAEEGEIESHYPLKKR       | N | 4 | 2127.0484 | 2127.0522 | 0.0038  | 0       | 1.77    | 1.765 | 0.042 | 6.3 | 16 | 32 | 102 | 2 | 0   | 1 |
| Q5UZZ6_HALMA | 1 | Putative oxidoreductase   | gltD2 | rmAC2334 | 1021 | 14.8 | 9 | 16 | 1      | K | LGDLNGLADHGLK           | F | 3 | 1450.7416 | 1450.7451 | 0.0035  | 0       | 2.42    | 3.968 | 0.273 | 0   | 1  | 29 | 52  | 2 | 0   | 1 |
| Q5UZZ6_HALMA | 1 | Putative oxidoreductase   | gltD2 | rmAC2334 | 1021 | 14.8 | 9 | 16 | 1      | K | LGDLNGLADHGLK           | F | 3 | 1450.7416 | 1450.7422 | 0.0006  | 0       | 0.40    | 3.584 | 0.27  | 0.1 | 1  | 27 | 52  | 2 | 0   | 1 |
| Q5UZZ6_HALMA | 1 | Putative oxidoreductase   | gltD2 | rmAC2334 | 1021 | 14.8 | 9 | 16 | 0.9923 | K | SGLPILLSR               | T | 2 | 954.5862  | 954.5854  | -0.0008 | 0       | -0.81   | 1.752 | 0.176 | 0.2 | 1  | 13 | 16  | 2 | 0   | 1 |
| Q5UZZ6_HALMA | 1 | Putative oxidoreductase   | gltD2 | rmAC2334 | 1021 | 14.8 | 9 | 16 | 1      | K | SVEGVETMESIADAVTDLVVK   | Y | 3 | 2191.0930 | 2191.1034 | 0.0103  | 0       | 4.71    | 5.822 | 0.475 | 0   | 1  | 41 | 80  | 2 | 0   | 1 |
| Q5UZZ6_HALMA | 1 | Putative oxidoreductase   | gltD2 | rmAC2334 | 1021 | 14.8 | 9 | 16 | 1      | K | SVEGVETMESIADAVTDLVVK   | Y | 3 | 2191.0930 | 2191.0947 | 0.0017  | 0       | 0.79    | 5.758 | 0.468 | 0   | 1  | 39 | 80  | 2 | 0   | 1 |
| Q5UZZ6_HALMA | 1 | Putative oxidoreductase   | gltD2 | rmAC2334 | 1021 | 14.8 | 9 | 16 | 1      | K | SVEGVETMESIADAVTDLVVK   | Y | 2 | 2191.0930 | 2191.0936 | 0.0006  | 0       | 0.26    | 6.075 | 0.605 | 0   | 1  | 27 | 40  | 2 | 0   | 1 |
| Q5UZZ6_HALMA | 1 | Putative oxidoreductase   | gltD2 | rmAC2334 | 1021 | 14.8 | 9 | 16 | 1      | K | SVEGVETMESIADAVTDLVVK   | Y | 3 | 2191.0930 | 2191.1004 | 0.0074  | 0       | 3.38    | 5.384 | 0.463 | 0   | 1  | 38 | 80  | 2 | 0   | 1 |
| Q5UZZ6_HALMA | 1 | Putative oxidoreductase   | gltD2 | rmAC2334 | 1021 | 14.8 | 9 | 16 | 1      | K | SVEGVETMESIADAVTDLVVK   | Y | 2 | 2191.0930 | 2191.0992 | 0.0062  | 0       | 2.83    | 6.092 | 0.566 | 0   | 1  | 27 | 40  | 2 | 0   | 1 |
| Q5UZZ6_HALMA | 1 | Putative oxidoreductase   | gltD2 | rmAC2334 | 1021 | 14.8 | 9 | 16 | 1      | K | SVLGGAIAGNNSTGAHLSLQYGK | T | 2 | 2030.0181 | 2031.0312 | 1.0131  | -1.0034 | 4.80    | 5.29  | 0.512 | 0   | 1  | 24 | 40  | 2 | 0   | 1 |
| Q5UZZ6_HALMA | 1 | Putative oxidoreductase   | gltD2 | rmAC2334 | 1021 | 14.8 | 9 | 16 | 1      | R | TQWNEKLYGPDLTWETFQELK   | S | 3 | 2524.2274 | 2524.2328 | 0.0054  | 0       | 2.13    | 5.358 | 0.463 | 0   | 1  | 36 | 76  | 2 | 1   | 1 |
| Q5UZZ6_HALMA | 1 | Putative oxidoreductase   | gltD2 | rmAC2334 | 1021 | 14.8 | 9 | 16 | 0.9495 | R | VLEAAGVHVQLADR          | T | 3 | 1476.8049 | 1476.8085 | 0.0035  | 0       | 2.40    | 2.18  | 0.11  | 2.3 | 50 | 18 | 52  | 2 | 0   | 1 |
| Q5V4U8_HALMA | 1 | Glycosyl transferase-like | gtl   | rmAC0419 | 348  | 23   | 6 | 16 | 1      | R | DGATHTLTLYQMAK          | T | 2 | 1536.8221 | 1536.8243 | 0.0022  | 0       | 1.43    | 4.308 | 0.318 | 0   | 1  | 20 | 26  | 2 | 0   | 1 |
| Q5V4U8_HALMA | 1 | Glycosyl transferase-like | gtl   | rmAC0419 | 348  | 23   | 6 | 16 | 1      | R | DGATHTLTLYQMAK          | T | 2 | 1536.8221 | 1536.8274 | 0.0052  | 0       | 3.41    | 3.911 | 0.527 | 0   | 1  | 20 | 26  | 2 | 0</ |   |



|              |   |                      |          |          |     |      |   |    |        |   |                                     |   |   |           |           |         |         |        |       |       |     |    |    |     |   |   |     |
|--------------|---|----------------------|----------|----------|-----|------|---|----|--------|---|-------------------------------------|---|---|-----------|-----------|---------|---------|--------|-------|-------|-----|----|----|-----|---|---|-----|
| Q5UX17_HALMA | 1 | Hypothetical protein | rmAC3517 | rmAC3517 | 772 | 8.5  | 5 | 14 | 1      | K | FVIWLLPDGLGR                        | T | 2 | 1384.7867 | 1384.7893 | 0.0026  | 0       | 1.85   | 3.315 | 0.43  | 0   | 1  | 18 | 22  | 2 | 0 | 1   |
| Q5UX17_HALMA | 1 | Hypothetical protein | rmAC3517 | rmAC3517 | 772 | 8.5  | 5 | 14 | 1      | K | FVIWLLPDGLGR                        | T | 2 | 1384.7867 | 1384.7871 | 0.0004  | 0       | 0.26   | 3.236 | 0.465 | 0   | 1  | 19 | 22  | 2 | 0 | 1   |
| Q5UX17_HALMA | 1 | Hypothetical protein | rmAC3517 | rmAC3517 | 772 | 8.5  | 5 | 14 | 1      | R | RVDDVETIYTGDATEQRR                  | L | 3 | 2123.0243 | 2123.0258 | 0.0015  | 0       | 0.71   | 4.022 | 0.355 | 0   | 64 | 22 | 68  | 2 | 0 | 1   |
| Q5UX17_HALMA | 1 | Hypothetical protein | rmAC3517 | rmAC3517 | 772 | 8.5  | 5 | 14 | 0.9978 | R | RVDDVETIYTGDATEQRR                  | L | 3 | 2123.0243 | 2123.0240 | -0.0003 | 0       | -0.15  | 3.659 | 0.128 | 0.1 | 20 | 21 | 68  | 2 | 0 | 1   |
| Q5UXW3_HALMA | 1 | Hypothetical protein | rmAC3517 | rmAC3517 | 772 | 8.5  | 5 | 14 | 1      | R | YGDVTVDQLQGVTVAK                    | R | 2 | 1691.8730 | 1692.7892 | 0.9161  | -1.0034 | -51.55 | 4.456 | 0.463 | 0   | 1  | 24 | 30  | 2 | 0 | 1   |
| Q5UXW3_HALMA | 1 | Hypothetical protein | rmAC3185 | rmAC3185 | 115 | 64.3 | 5 | 14 | 1      | K | LPMIESPEDETAQDETDAPNATEPTVDPVDHLR   | E | 3 | 3631.6472 | 3632.6625 | 1.0153  | -1.0034 | 3.28   | 6.854 | 0.538 | 0   | 1  | 44 | 128 | 2 | 0 | 1   |
| Q5UXW3_HALMA | 1 | Hypothetical protein | rmAC3185 | rmAC3185 | 115 | 64.3 | 5 | 14 | 1      | R | GELTDSEFER                          | R | 2 | 1181.5200 | 1181.5187 | -0.0014 | 0       | -1.16  | 3.002 | 0.343 | 0   | 1  | 15 | 18  | 2 | 0 | 1   |
| Q5UXW3_HALMA | 1 | Hypothetical protein | rmAC3185 | rmAC3185 | 115 | 64.3 | 5 | 14 | 1      | R | GELTDSEFER                          | R | 2 | 1181.5200 | 1181.5193 | -0.0008 | 0       | -0.65  | 2.845 | 0.339 | 0   | 1  | 15 | 18  | 2 | 0 | 1   |
| Q5UXW3_HALMA | 1 | Hypothetical protein | rmAC3185 | rmAC3185 | 115 | 64.3 | 5 | 14 | 1      | R | GELTDSEFER                          | R | 2 | 1181.5200 | 1181.5217 | 0.0017  | 0       | 1.42   | 2.66  | 0.307 | 0   | 1  | 15 | 18  | 2 | 0 | 1   |
| Q5UXW3_HALMA | 1 | Hypothetical protein | rmAC3185 | rmAC3185 | 115 | 64.3 | 5 | 14 | 1      | R | LLETESLSATSEAEINTTGEADR             | E | 2 | 2323.0663 | 2323.0731 | 0.0068  | 0       | 2.91   | 6.183 | 0.63  | 0   | 1  | 29 | 42  | 2 | 0 | 1   |
| Q5UXW3_HALMA | 1 | Hypothetical protein | rmAC3185 | rmAC3185 | 115 | 64.3 | 5 | 14 | 1      | R | LLETESLSATSEAEINTTGEADREVSLTE       | - | 2 | 3110.4262 | 3110.4278 | 0.0016  | 0       | 0.52   | 4.185 | 0.434 | 0   | 1  | 18 | 56  | 2 | 1 | 1   |
| Q5UXW3_HALMA | 1 | Hypothetical protein | rmAC3185 | rmAC3185 | 115 | 64.3 | 5 | 14 | 1      | R | LLETESLSATSEAEINTTGEADREVSLTE       | - | 3 | 3110.4262 | 3110.4314 | 0.0052  | 0       | 1.67   | 4.668 | 0.395 | 0   | 2  | 26 | 112 | 2 | 1 | 1   |
| Q5UXW3_HALMA | 1 | Hypothetical protein | rmAC3185 | rmAC3185 | 115 | 64.3 | 5 | 14 | 1      | R | LLETESLSATSEAEINTTGEADREVSLTE       | - | 3 | 3110.4262 | 3110.4300 | 0.0037  | 0       | 1.20   | 4.324 | 0.328 | 0   | 1  | 30 | 112 | 2 | 1 | 1   |
| Q5UXW3_HALMA | 1 | Hypothetical protein | rmAC3185 | rmAC3185 | 115 | 64.3 | 5 | 14 | 0.9938 | R | LLETESLSATSEAEINTTGEADREVSLTE       | - | 3 | 3110.4262 | 3110.4424 | 0.0162  | 0       | 5.20   | 3.369 | 0.212 | 0.1 | 79 | 23 | 112 | 2 | 1 | 1   |
| Q5UXW3_HALMA | 1 | Hypothetical protein | rmAC3185 | rmAC3185 | 115 | 64.3 | 5 | 14 | 1      | K | LPMIESPEDETAQDETDAPNATEPTVDPVDHLR   | E | 3 | 3647.6472 | 3647.6526 | 0.0054  | 0       | 1.48   | 6.001 | 0.517 | 0   | 1  | 43 | 128 | 2 | 0 | 1   |
| Q5UXW3_HALMA | 1 | Hypothetical protein | rmAC3185 | rmAC3185 | 115 | 64.3 | 5 | 14 | 1      | K | LPMIESPEDETAQDETDAPNATEPTVDPVDHLR   | E | 3 | 3647.6472 | 3648.6465 | 0.9993  | -1.0034 | -1.12  | 5.288 | 0.535 | 0   | 1  | 40 | 128 | 2 | 0 | 1   |
| Q5UXW3_HALMA | 1 | Hypothetical protein | rmAC3185 | rmAC3185 | 115 | 64.3 | 5 | 14 | 1      | K | LPMIESPEDETAQDETDAPNATEPTVDPVDHLRER | Y | 4 | 3932.7909 | 3934.8109 | 2.0200  | -2.0067 | 3.37   | 5.124 | 0.408 | 0   | 1  | 46 | 204 | 2 | 1 | 1</ |









|              |   |                       |          |          |     |      |   |    |        |   |                                       |           |        |           |           |         |         |        |       |       |     |    |    |     |   |   |   |
|--------------|---|-----------------------|----------|----------|-----|------|---|----|--------|---|---------------------------------------|-----------|--------|-----------|-----------|---------|---------|--------|-------|-------|-----|----|----|-----|---|---|---|
| Q5UW7_HALMA  | 1 | Hypothetical protein  | rmB0228  | rmB0228  | 415 | 11.6 | 2 | 11 | 0.9994 | R | DALGGTFTTVLGDITLR                     | E         | 2      | 1877.9734 | 1878.8654 | 0.8920  | -1.0034 | -59.28 | 2.798 | 0.277 | 0   | 1  | 14 | 34  | 2 | 0 | 1 |
| Q5UW7_HALMA  | 1 | Hypothetical protein  | rmB0228  | rmB0228  | 415 | 11.6 | 2 | 11 | 1      | R | YDPSLETGDNQAFVFEAYSSENDRQPGNFAR       | V         | 3      | 3376.4868 | 3376.4892 | 0.0023  | 0       | 0.69   | 3.755 | 0.454 | 0   | 1  | 33 | 116 | 2 | 1 | 1 |
| Q5UW7_HALMA  | 1 | Hypothetical protein  | rmB0228  | rmB0228  | 415 | 11.6 | 2 | 11 | 1      | R | YDPSLETGDNQAFVFEAYSSENDRQPGNFAR       | V         | 3      | 3376.4868 | 3376.4906 | 0.0038  | 0       | 1.12   | 3.457 | 0.531 | 0   | 1  | 34 | 116 | 2 | 1 | 1 |
| Q5UW7_HALMA  | 1 | Hypothetical protein  | rmB0228  | rmB0228  | 415 | 11.6 | 2 | 11 | 1      | R | YDPSLETGDNQAFVFEAYSSENDRQPGNFAR       | V         | 3      | 3376.4868 | 3376.4818 | -0.0050 | 0       | -1.48  | 3.985 | 0.425 | 0   | 1  | 35 | 116 | 2 | 1 | 1 |
| Q5UX17_HALMA | 1 | Cell division protein | ftsZ4    | rmAC3326 | 357 | 39.8 | 8 | 11 | 0.9201 | K | GHGVGGDNELGAQVQENATEVLDDELDR          | I         | 3      | 3009.3734 | 3009.4594 | 0.0859  | 0       | 28.56  | 2.732 | 0.043 | 4.1 | 21 | 23 | 112 | 2 | 0 | 1 |
| Q5UX17_HALMA | 1 | Cell division protein | ftsZ4    | rmAC3326 | 357 | 39.8 | 8 | 11 | 0.9997 | K | ALLTSMSLPNAVK                         | A         | 2      | 1343.7482 | 1343.7506 | 0.0024  | 0       | 1.76   | 2.547 | 0.239 | 0.2 | 1  | 16 | 24  | 2 | 0 | 1 |
| Q5UX17_HALMA | 1 | Cell division protein | ftsZ4    | rmAC3326 | 357 | 39.8 | 8 | 11 | 0.9998 | R | GGDFPLGSDKIASLIVLSGVER                | S         | 3      | 2229.2005 | 2229.1992 | -0.0013 | 0       | -0.60  | 3.46  | 0.305 | 0   | 17 | 24 | 84  | 2 | 1 | 1 |
| Q5UX17_HALMA | 1 | Cell division protein | ftsZ4    | rmAC3326 | 357 | 39.8 | 8 | 11 | 1      | K | IASLIVLSGVFER                         | S         | 2      | 1255.7500 | 1255.7530 | 0.0030  | 0       | 2.39   | 3.43  | 0.406 | 0   | 1  | 20 | 22  | 2 | 0 | 1 |
| Q5UX17_HALMA | 1 | Cell division protein | ftsZ4    | rmAC3326 | 357 | 39.8 | 8 | 11 | 1      | R | IYKPVYVVLGILPGRDEGGLYQANAGR           | S         | 3      | 2947.5556 | 2947.5714 | 0.0157  | 0       | 5.34   | 3.707 | 0.458 | 0   | 1  | 37 | 104 | 2 | 1 | 1 |
| Q5UX17_HALMA | 1 | Cell division protein | ftsZ4    | rmAC3326 | 357 | 39.8 | 8 | 11 | 1      | R | IYKPVYVVLGILPGRDEGGLYQANAGR           | S         | 3      | 2947.5556 | 2948.5582 | 1.0025  | -1.0034 | -0.27  | 4.203 | 0.513 | 0   | 1  | 35 | 104 | 2 | 1 | 1 |
| Q5UX17_HALMA | 1 | Cell division protein | ftsZ4    | rmAC3326 | 357 | 39.8 | 8 | 11 | 0.9999 | S | 2947.5556                             | 2949.5709 | 2.0153 | -2.0067   | 2.91      | 3.933   | 0.271   | 0      | 1     | 43    | 156 | 2  | 1  | 1   | 1 |   |   |
| Q5UX17_HALMA | 1 | Cell division protein | ftsZ4    | rmAC3326 | 357 | 39.8 | 8 | 11 | 0.9497 | R | SERVNEFMER                            | A         | 3      | 1295.5928 | 1295.5930 | 0.0002  | 0       | 0.14   | 2.691 | 0.116 | 0.4 | 98 | 17 | 36  | 2 | 1 | 1 |
| Q5UX17_HALMA | 1 | Cell division protein | ftsZ4    | rmAC3326 | 357 | 39.8 | 8 | 11 | 1      | R | VGLLFSAGEAVEGVGESVVDSEIINTLR          | G         | 3      | 2946.5186 | 2948.5282 | 2.0095  | -2.0067 | 0.97   | 5.124 | 0.454 | 0   | 1  | 36 | 112 | 2 | 0 | 1 |
| Q5UX17_HALMA | 1 | Cell division protein | ftsZ4    | rmAC3326 | 357 | 39.8 | 8 | 11 | 0.9986 | R | WVEDQTGSMMEVR                         | G         | 2      | 1451.6402 | 1452.6034 | 0.9631  | -1.0034 | -27.70 | 2.665 | 0.243 | 0.2 | 2  | 12 | 22  | 2 | 0 | 1 |
| Q5UYB2_HALMA | 1 | Hypothetical protein  | rmAC3015 | rmAC3015 | 236 | 18.6 | 2 | 11 | 1      | R | LGAMALPLALLAVPVALAPANPVHGDVPAALVAAAYR | W         | 4      | 3501.9898 | 3501.9958 | 0.0060  | 0       | 1.71   | 6.061 | 0.515 | 0   | 1  | 59 | 210 | 2 | 0 | 1 |
| Q5UYB2_HALMA | 1 | Hypothetical protein  | rmAC3015 | rmAC3015 | 236 | 18.6 | 2 | 11 | 1      | R | LGAMALPLALLAVPVALAPANPVHGDVPAALVAAAYR | W         | 3      | 3501.9898 | 3502.9882 | 0.9983  | -1.0034 | -1.43  | 4.237 | 0.488 | 0   | 1  | 39 | 140 | 2 | 0 | 1 |
| Q5UYB2_HALMA | 1 | Hypothetical protein  | rmAC3015 | rmAC3015 | 236 | 18.6 | 2 | 11 | 1      | R | LGAMALPLALLAVPVALAPANPVHGDVPAALVAAAYR | W         | 3      | 3501.9898 | 3504.0082 | 2.0183  | -2.0067 | 3.33   | 4.744 | 0.509 | 0   |    |    |     |   |   |   |

|                  |   |                                                                                           |         |          |     |      |   |    |        |   |                               |           |           |           |           |         |         |        |       |       |     |     |    |     |   |   |   |                         |
|------------------|---|-------------------------------------------------------------------------------------------|---------|----------|-----|------|---|----|--------|---|-------------------------------|-----------|-----------|-----------|-----------|---------|---------|--------|-------|-------|-----|-----|----|-----|---|---|---|-------------------------|
| Q5V3U2_HALMA     | 1 | Branched-chain amino acid ABC transporter ATP-binding protein                             | livG-4  | rmAC0827 | 276 | 27.5 | 4 | 11 | 1      | R | ELSEMTVLNVNMLAPGGQVGESVIR     | S         | 3         | 2657.3404 | 2657.3452 | 0.0048  | 0       | 1.79   | 4.301 | 0.279 | 0   | 1   | 29 | 96  | 2 | 0 | 1 | AGFAVAHGVITYTPEM[147]AR |
| Q5V3U2_HALMA     | 1 | Branched-chain amino acid ABC transporter ATP-binding protein                             | livG-4  | rmAC0827 | 276 | 27.5 | 4 | 11 | 1      | R | ELSEMTVLNVNMLAPGGQVGESVIR     | S         | 3         | 2657.3404 | 2657.3424 | 0.0020  | 0       | 0.75   | 4.193 | 0.337 | 0   | 1   | 33 | 96  | 2 | 0 | 1 |                         |
| Q5V3U2_HALMA     | 1 | Branched-chain amino acid ABC transporter ATP-binding protein                             | livG-4  | rmAC0827 | 276 | 27.5 | 4 | 11 | 1      | R | ELSEMTVLNVNMLAPGGQVGESVIR     | S         | 3         | 2657.3404 | 2657.3377 | -0.0028 | 0       | -1.04  | 4.199 | 0.373 | 0   | 1   | 33 | 96  | 2 | 0 | 1 |                         |
| Q5V3U2_HALMA     | 1 | Branched-chain amino acid ABC transporter ATP-binding protein                             | livG-4  | rmAC0827 | 276 | 27.5 | 4 | 11 | 1      | R | ELSEMTVLNVNMLAPGGQVGESVIR     | S         | 2         | 2657.3404 | 2657.3438 | 0.0034  | 0       | 1.29   | 2.977 | 0.33  | 0   | 2   | 16 | 48  | 2 | 0 | 1 |                         |
| Q5V3U2_HALMA     | 1 | Branched-chain amino acid ABC transporter ATP-binding protein                             | livG-4  | rmAC0827 | 276 | 27.5 | 4 | 11 | 0.9928 | E | QETA VTSDAIESPLLEVTGLRK       | E         | 3         | 2356.2485 | 2356.2382 | -0.0104 | 0       | -4.39  | 2.105 | 0.183 | 1.5 | 3   | 21 | 84  | 2 | 0 | 1 |                         |
| Q5V3U2_HALMA     | 1 | Branched-chain amino acid ABC transporter ATP-binding protein                             | livG-4  | rmAC0827 | 276 | 27.5 | 4 | 11 | 1      | R | VLMTPEMILLDEPLAGVNPITLEEK     | L         | 2         | 2780.4227 | 2780.4298 | 0.0071  | 0       | 2.54   | 4.496 | 0.523 | 0   | 1   | 20 | 48  | 2 | 0 | 1 |                         |
| Q5V3U2_HALMA     | 1 | Branched-chain amino acid ABC transporter ATP-binding protein                             | livG-4  | rmAC0827 | 276 | 27.5 | 4 | 11 | 0.9938 | R | VLMTPEMILLDEPLAGVNPITLEEK     | L         | 3         | 2780.4227 | 2780.4289 | 0.0061  | 0       | 2.21   | 3.075 | 0.104 | 0.5 | 2   | 24 | 96  | 2 | 0 | 1 |                         |
| Q5V3U2_HALMA     | 1 | Branched-chain amino acid ABC transporter ATP-binding protein                             | livG-4  | rmAC0827 | 276 | 27.5 | 4 | 11 | 0.9864 | R | VLMTPEMILLDEPLAGVNPITLEEK     | L         | 3         | 2780.4227 | 2780.4316 | 0.0089  | 0       | 3.19   | 3.563 | 0.125 | 0.1 | 249 | 19 | 96  | 2 | 0 | 1 |                         |
| Q5V3U2_HALMA     | 1 | Branched-chain amino acid ABC transporter ATP-binding protein                             | livG-4  | rmAC0827 | 276 | 27.5 | 4 | 11 | 1      | R | VLMTPEMILLDEPLAGVNPITLEEKLLEK | I         | 3         | 3291.7346 | 3291.7421 | 0.0075  | 0       | 2.27   | 5.949 | 0.501 | 0   | 1   | 39 | 112 | 2 | 0 | 1 |                         |
| Q5V3U2_HALMA     | 1 | Branched-chain amino acid ABC transporter ATP-binding protein                             | livG-4  | rmAC0827 | 276 | 27.5 | 4 | 11 | 0.9945 | R | VLMTPEMILLDEPLAGVNPITLEEKLLEK | I         | 4         | 3291.7346 | 3291.7297 | -0.0049 | 0       | -1.50  | 3.079 | 0.083 | 0.8 | 2   | 40 | 168 | 2 | 0 | 1 |                         |
| Q5V4T9_HALMA     | 1 | LPS glycosyltransferase                                                                   | lpg3    | rmAC0429 | 397 | 17.4 | 4 | 11 | 1      | R | LNWEQQLPDQVAAVLAGAVR          | A         | 2         | 2177.1593 | 2177.1690 | 0.0097  | 0       | 4.46   | 4.335 | 0.512 | 0   | 1   | 24 | 38  | 2 | 0 | 1 |                         |
| Q5V4T9_HALMA     | 1 | LPS glycosyltransferase                                                                   | lpg3    | rmAC0429 | 397 | 17.4 | 4 | 11 | 1      | R | AGFAVAHGVITYTPEMAR            | Q         | 2         | 1905.9458 | 1905.8209 | -0.1249 | 0       | -65.55 | 2.756 | 0.327 | 0.1 | 1   | 16 | 34  | 2 | 0 | 1 |                         |
| Q5V4T9_HALMA     | 1 | LPS glycosyltransferase                                                                   | lpg3    | rmAC0429 | 397 | 17.4 | 4 | 11 | 0.9030 | Q | 3                             | 1889.9458 | 1890.9382 | 0.9923    | -1.0034   | -5.82   | 2.736   | 0.064  | 0.4   | 10    | 24  | 68  | 2  | 0   | 1 |   |   |                         |
| Q5V4T9_HALMA     | 1 | LPS glycosyltransferase                                                                   | lpg3    | rmAC0429 | 397 | 17.4 | 4 | 11 | 1      | R | ELAAAVATQLPDDITFR             | F         | 2         | 1758.9152 | 1758.9266 | 0.0114  | 0       | 6.47   | 5.296 | 0.559 | 0   | 1   | 24 | 30  | 2 | 0 | 1 |                         |
| Q5V4T9_HALMA     | 1 | LPS glycosyltransferase                                                                   | lpg3    | rmAC0429 | 397 | 17.4 | 4 | 11 | 0.9770 | R | ILDRNDLAAISENGR               | T         | 3         | 1655.8591 | 1656.8482 | 0.9890  | -1.0034 | -8.64  | 2.542 | 0.173 | 0.5 | 2   | 25 | 56  | 2 | 0 | 1 |                         |
| Q5V4T9_HALMA     | 1 | LPS glycosyltransferase                                                                   | lpg3    | rmAC0429 | 397 | 17.4 | 4 | 11 | 1      | R | LNWEQQLPDQVAAVLAGAVR          | A         | 3         | 2177.1593 | 2177.1617 | 0.0024  | 0       | 1.09   | 4.825 | 0.392 | 0   | 1   | 36 | 76  | 2 | 0 | 1 |                         |
| Q5V4T9_HALMA     | 1 | LPS glycosyltransferase                                                                   | lpg3    | rmAC0429 | 397 | 17.4 | 4 | 11 | 1      | R | LNWEQQLPDQVAAVLAGAVR          | A         | 3         | 2177.1593 | 2177.1641 | 0.0048  | 0       | 2.19   | 4.979 | 0.454 | 0   | 1   | 35 | 76  | 2 | 0 | 1 |                         |
| Q5V4T9_HALMA     | 1 | LPS glycosyltransferase                                                                   | lpg3    | rmAC0429 | 397 | 17.4 | 4 | 11 | 1      | R | LNWEQQLPDQVAAVLAGAVR          | A         | 3         | 2177.1593 | 2177.1610 | 0.0016  | 0       | 0.76   | 4.698 | 0.427 | 0   | 1   | 37 | 76  | 2 | 0 | 1 |                         |
| Q5V4T9_HALMA     | 1 | LPS glycosyltransferase                                                                   | lpg3    | rmAC0429 | 397 | 17.4 | 4 | 11 | 1      | R | LNWEQQLPDQVAAVLAGAVR          | A         | 3         | 2177.1593 | 2177.1637 | 0.0044  | 0       | 2.02   | 4.515 | 0.443 | 0   | 1   | 39 | 76  | 2 | 0 | 1 |                         |
| Q5V4T9_HALMA     | 1 | LPS glycosyltransferase                                                                   | lpg3    | rmAC0429 | 397 | 17.4 | 4 | 11 | 1      | R | LNWEQQLPDQVAAVLAGAVR          | A         | 2         | 2177.1593 | 2177.1686 | 0.0092  | 0       | 4.24   | 4.815 | 0.519 | 0   | 1   | 27 | 38  | 2 | 0 | 1 |                         |
| Q5V6i6_HALMA     | 1 | Hypothetical protein                                                                      | pNG7148 | pNG7148  | 270 | 23   | 4 | 11 | 0.9976 | R | GELDILDITPLSTWSYVGGVYAGR      | A         | 3         | 2631.2857 | 2631.2805 | -0.0052 | 0       | -1.99  | 3.231 | 0.203 | 0.2 | 101 | 23 | 92  | 2 | 0 | 1 |                         |
| Q5V6i6_HALMA     | 1 | Hypothetical protein                                                                      | pNG7148 | pNG7148  | 270 | 23   | 4 | 11 | 1      | R | GLVFDQVLYVAVPGR               | S         | 3         | 1631.9035 | 1631.9046 | 0.0010  | 0       | 0.64   | 3.446 | 0.34  | 0   | 2   | 29 | 56  | 2 | 0 | 1 |                         |
| Q5V6i6_HALMA     | 1 | Hypothetical protein                                                                      | pNG7148 | pNG7148  | 270 | 23   | 4 | 11 | 1      | R | GLVFDQVLYVAVPGR               | S         | 3         | 1631.9035 | 1631.9042 | 0.0007  | 0       | 0.41   | 3.586 | 0.298 | 0   | 1   | 33 | 56  | 2 | 0 | 1 |                         |
| Q5V6i6_HALMA     | 1 | Hypothetical protein                                                                      | pNG7148 | pNG7148  | 270 | 23   | 4 | 11 | 0.9999 | R | GLVFDQVLYVAVPGR               | S         | 2         | 1631.9035 | 1631.9067 | 0.0032  | 0       | 1.95   | 2.315 | 0.338 | 0   | 1   | 17 | 28  | 2 | 0 | 1 |                         |
| Q5V6i6_HALMA     | 1 | Hypothetical protein                                                                      | pNG7148 | pNG7148  | 270 | 23   | 4 | 11 | 0.9999 | R | GLVFDQVLYVAVPGR               | S         | 2         | 1631.9035 | 1631.9092 | 0.0056  | 0       | 3.45   | 2.471 | 0.305 | 0.1 | 1   | 14 | 28  | 2 | 0 | 1 |                         |
| Q5V6i6_HALMA     | 1 | Hypothetical protein                                                                      | pNG7148 | pNG7148  | 270 | 23   | 4 | 11 | 0.9998 | R | GLVFDQVLYVAVPGR               | S         | 2         | 1631.9035 | 1631.9116 | 0.0081  | 0       | 4.95   | 3.061 | 0.202 | 0   | 1   | 18 | 28  | 2 | 0 | 1 |                         |
| Q5V6i6_HALMA     | 1 | Hypothetical protein                                                                      | pNG7148 | pNG7148  | 270 | 23   | 4 | 11 | 1      | R | GVDSPFLEFR                    | F         | 2         | 1149.6182 | 1149.6212 | 0.0030  | 0       | 2.58   | 2.742 | 0.31  | 0   | 1   | 14 | 18  | 2 | 0 | 1 |                         |
| Q5V6i6_HALMA     | 1 | Hypothetical protein                                                                      | pNG7148 | pNG7148  | 270 | 23   | 4 | 11 | 1      | - | MTEGNWFWTVFVR                 | E         | 2         | 1671.7868 | 1671.7854 | -0.0014 | 0       | -0.82  | 3.83  | 0.48  | 0   | 1   | 20 | 24  | 2 | 0 | 1 |                         |
| Q5V6i6_HALMA     | 1 | Hypothetical protein                                                                      | pNG7148 | pNG7148  | 270 | 23   | 4 | 11 | 1      | - | MTEGNWFWTVFVR                 | E         | 2         | 1687.7868 | 1687.7849 | -0.0019 | 0       | -1.15  | 3.505 | 0.509 | 0   | 1   | 17 | 24  | 2 | 0 | 1 |                         |
| Q5V6i6_HALMA     | 1 | Hypothetical protein                                                                      | pNG7148 | pNG7148  | 270 | 23   | 4 | 11 | 1      | - | MTEGNWFWTVFVR                 | E         | 3         | 1671.7868 | 1671.7793 | -0.0076 | 0       | -4.53  | 2.989 | 0.328 | 0.1 | 28  | 19 | 48  | 2 | 0 | 1 |                         |
| Q5V6i6_HALMA     | 1 | Hypothetical protein                                                                      | pNG7148 | pNG7148  | 270 | 23   | 4 | 11 | 0.9988 | - | MTEGNWFWTVFVR                 | E         | 3         | 1671.7868 | 1671.7882 | 0.0013  | 0       | 0.81   | 2.659 | 0.154 | 0.3 | 1   | 22 | 48  | 2 | 0 | 1 |                         |
| SECG_HALMAReview | 1 | Preprotein translocase secG subunit (Protein transport protein SEC61subunit beta homolog) | secG    | rmAC2111 | 53  | 50.9 | 2 | 11 | 1      | R | YFDAEDQNTIR                   | I         | 2         | 1370.6102 | 1370.6123 | 0.0021  | 0       | 1.50   | 3.688 | 0.489 | 0   | 1   | 18 | 20  | 2 | 0 | 1 | SGSDGGGLM[147]SSAGLVR   |
| SECG_HALMAReview | 1 | Preprotein translocase secG subunit (Protein transport protein SEC61subunit beta homolog) | secG    | rmAC2111 | 53  | 50.9 | 2 | 11 | 1      | M | SGSDGGGLMSSAGLVR              | Y         | 2         | 1465.6882 | 1465.6841 | -0.0042 | 0       | -2.84  | 4.077 | 0.482 | 0   | 1   | 20 | 30  | 2 | 0 | 1 |                         |
| SECG_HALMAReview | 1 | Preprotein translocase secG subunit (Protein transport protein SEC61subunit beta homolog) | secG    | rmAC2111 | 53  | 50.9 | 2 | 11 | 1      | M | SGSDGGGLMSSAGLVR              | Y         | 2         | 1449.6882 | 1449.6888 | 0.0006  | 0       | 0.41   | 3.681 | 0.471 | 0   | 1   | 21 | 30  | 2 | 0 | 1 |                         |
| SECG_HALMAReview | 1 | Preprotein translocase secG subunit (Protein transport protein SEC61subunit beta homolog) | secG    | rmAC2111 | 53  | 50.9 | 2 | 11 | 0.9139 | M | SGSDGGGLMSSAGLVR              | Y         | 2         | 1449.6882 | 1450.7237 | 1.0355  | -1.0034 | 22.18  | 3.855 | 0.125 | 0   | 1   | 22 | 30  | 2 | 0 | 1 |                         |
| SECG_HALMAReview | 1 | Preprotein translocase secG subunit (Protein transport protein SEC61subunit beta homolog) | secG    | rmAC2111 | 53  | 50.9 | 2 | 11 | 1      | R | YFDAEDQNTIR                   | I         | 2         | 1370.6102 | 1370.6112 | 0.0010  | 0       | 0.70   | 3.553 | 0.465 | 0   | 1   | 18 | 20  | 2 | 0 | 1 |                         |
| SECG_HALMAReview | 1 | Preprotein translocase secG subunit (Protein transport protein SEC61subunit beta homolog) | secG    | rmAC2111 | 53  | 50.9 | 2 | 11 | 1      | R | YFDAEDQNTIR                   | I         | 2         | 1370.6102 | 1370.6112 | 0.0010  | 0       | 0.70   | 3.539 | 0.487 | 0   | 1   | 18 | 20  | 2 | 0 | 1 |                         |
| SECG_HALMAReview | 1 | Preprotein translocase secG subunit (Protein transport protein SEC61subunit beta homolog) | secG    | rmAC2111 | 53  | 50.9 | 2 | 11 | 1      | R | YFDAEDQNTIR                   | I         | 2         | 1370.6102 | 1370.6111 | 0.0008  | 0       | 0.61   | 3.466 | 0.512 | 0   | 1   | 18 | 20  | 2 | 0 | 1 |                         |
| SECG_HALMAReview | 1 | Preprotein translocase secG subunit (Protein transport protein SEC61subunit beta homolog) | secG    | rmAC2111 | 53  | 50.9 | 2 | 11 | 1      | R | YFDAEDQNTIR                   | I         | 2         | 1370.6102 | 1370.6120 | 0.0018  | 0       | 1.32   | 3.676 | 0.447 | 0   | 1   | 18 | 20  | 2 | 0 | 1 |                         |
| SECG_HALMAReview | 1 | Preprotein translocase secG subunit (Protein transport protein SEC61subunit beta homolog) | secG    | rmAC2111 | 53  | 50.9 | 2 | 11 | 1      | R | YFDAEDQNTIR                   | I         | 2         | 1370.6102 | 1370.6092 | -0.0010 | 0       | -0.73  | 3.685 | 0.482 | 0   | 1   | 18 | 20  | 2 | 0 | 1 |                         |
| SECG_HALMAReview | 1 | Preprotein translocase secG subunit (Protein transport protein SEC61subunit beta homolog) | secG    | rmAC2111 | 53  | 50.9 | 2 | 11 | 0.9984 | R | YFDAEDQNTIR                   | I         | 2         | 1370.6102 | 1372.5905 | 1.9803  | -2.0067 | -19.24 | 2.461 | 0.253 | 0.4 | 1   | 15 | 20  | 2 | 0 | 1 |                         |
| SECG_HALMAReview | 1 | Preprotein translocase secG subunit (Protein transport protein SEC61subunit beta homolog) | secG    | rmAC2111 | 53  | 50.9 | 2 | 11 | 0.9956 | R | YFDAEDQNTIR                   | I         | 2         | 1370.6102 | 1372.5891 | 1.9789  | -2.0067 | -20.31 | 2.542 | 0.183 | 0.1 | 1   | 15 | 20  | 2 | 0 | 1 |                         |
| Q5UXC7_HALMA     | 1 | Universal stress protein family                                                           | usp24   | rmAC3395 | 146 | 30.8 | 2 | 10 | 1      | K | VIVEYADDDHISQIVMGSHGR         | S         | 3         | 2340.1168 | 2340.1232 | 0.0064  | 0       | 2.72   | 6.076 | 0.479 | 0   | 1   | 37 | 80  | 2 | 0 | 1 | Q5UWHO_HALMA            |
| Q5UXC7_HALMA     | 1 | Universal stress protein family                                                           | usp24   | rmAC3395 | 146 | 30.8 | 2 | 10 | 1      | K | ATAEDLLDDLESEVTEAGVESVER      | V         | 2         | 2576.1977 | 2576.2066 | 0.0089  | 0       | 3.46   | 5.159 | 0.592 | 0   | 1   | 28 | 46  | 2 | 0 | 1 |                         |
| Q5UXC7_HALMA     | 1 | Universal stress protein family                                                           | usp24   | rmAC3395 | 146 | 30.8 | 2 | 10 | 1      | K | ATAEDLLDDLESEVTEAGVESVER      | V         | 3         | 2576.1977 | 2576.2062 | 0.0085  | 0       | 3.29   | 5.922 | 0.522 | 0   | 1   | 44 | 92  | 2 | 0 | 1 |                         |
| Q5UXC7_HALMA     | 1 | Universal stress protein family                                                           | usp24   | rmAC3395 | 146 | 30.8 | 2 | 10 | 1      | K | ATAEDLLDDLESEVTEAGVESVER      | V         | 3         | 2576.1977 | 2576.2100 | 0.0123  | 0       | 4.78   | 5.789 | 0.544 | 0   | 1   | 44 | 92  | 2 | 0 | 1 |                         |
| Q5UXC7_HALMA     | 1 | Universal stress protein family                                                           | usp24   | rmAC3395 | 146 | 30.8 | 2 | 10 | 1      | K | ATAEDLLDDLESEVTEAGVESVER      | V         | 3         | 2576.1977 | 2576.1994 | 0.0017  | 0       | 0.66   | 5.928 | 0.548 | 0   | 1   | 41 | 92  | 2 | 0 | 1 |                         |
| Q5UXC7_HALMA     | 1 | Universal stress protein family                                                           | usp24   | rmAC3395 | 146 | 30.8 | 2 | 10 | 1      | K | ATAEDLLDDLESEVTEAGVESVER      | V         | 2         | 2576.1977 | 2576.2037 | 0.0060  | 0       | 2.32   | 4.778 | 0.574 | 0   | 1   | 29 | 46  | 2 | 0 | 1 |                         |
| Q5UXC7_HALMA     | 1 | Universal stress protein family                                                           | usp24   | rmAC3395 | 146 | 30.8 | 2 | 10 | 1      | K | ATAEDLLDDLESEVTEAGVESVER      | V         | 2         | 2576.1977 | 2576.2037 | 0.0060  | 0       | 2.32   | 4.832 | 0.58  | 0   | 1   | 28 | 46  | 2 | 0 | 1 |                         |
| Q5UXC7_HALMA     | 1 | Universal stress protein family                                                           | usp24   | rmAC3395 | 146 | 30.8 | 2 | 10 | 1      | K | ATAEDLLDDLESEVTEAGVESVER      | V         | 3         | 2576.1977 | 2576.2033 | 0.0055  | 0       | 2.15   | 6.303 | 0.547 | 0   | 1   | 43 | 92  | 2 | 0 | 1 |                         |
| Q5UXC7_HALMA     | 1 | Universal stress protein family                                                           | usp24   | rmAC3395 | 146 | 30.8 | 2 | 10 | 1      | K | VIVEYADDDHISQIVMGSHGR         | S         | 3         | 2340.1168 | 2340.1201 | 0.0033  | 0       | 1.39   | 3.972 | 0.272 | 0   | 7   | 22 |     |   |   |   |                         |







|              |   |                                                            |                 |          |     |      |   |   |        |   |                            |            |           |           |             |           |         |        |       |       |       |     |    |     |    |   |   |   |
|--------------|---|------------------------------------------------------------|-----------------|----------|-----|------|---|---|--------|---|----------------------------|------------|-----------|-----------|-------------|-----------|---------|--------|-------|-------|-------|-----|----|-----|----|---|---|---|
| Q5V741_HALMA | 1 | Zinc-transporting ATPase                                   | <i>zntA1</i>    | pNG6081  | 894 | 14.1 | 9 | 9 | 0.9744 | R | IVEMVEDAQSNKTEREQFVER      | F          | 3         | 2536.2227 | 2537.2282   | 1.0054    | -1.0034 | 0.83   | 2.736 | 0.227 | 1.1   | 43  | 20 | 80  | 2  | 2 | 1 |   |
| Q5V741_HALMA | 1 | Zinc-transporting ATPase                                   | <i>zntA1</i>    | pNG6081  | 894 | 14.1 | 9 | 9 | 1      | K | AGYTVEDTGEVSSK             | F          | 2         | 1441.6572 | 1441.6604   | 0.0032    | 0       | 2.18   | 3.885 | 0.512 | 0     | 1   | 21 | 26  | 2  | 0 | 1 |   |
| Q5V741_HALMA | 1 | Zinc-transporting ATPase                                   | <i>zntA1</i>    | pNG6081  | 894 | 14.1 | 9 | 9 | 0.9574 | V | GTLTVSYDGEQTSATAIANR       | V          | 2         | 2053.9916 | 2055.9054   | 1.9138    | -2.0067 | -45.22 | 2.704 | 0.067 | 1.4   | 1   | 19 | 38  | 2  | 0 | 1 |   |
| Q5V741_HALMA | 1 | Zinc-transporting ATPase                                   | <i>zntA1</i>    | pNG6081  | 894 | 14.1 | 9 | 9 | 0.9932 | R | IVEMVEDAQSNKTER            | E          | 2         | 1747.8410 | 1747.8381   | -0.0029   | 0       | -1.67  | 4.439 | 0.464 | 0     | 1   | 22 | 28  | 2  | 1 | 1 |   |
| Q5V741_HALMA | 1 | Zinc-transporting ATPase                                   | <i>zntA1</i>    | pNG6081  | 894 | 14.1 | 9 | 9 | 1      | K | LPYLVELAHDANGVIR           | Q          | 3         | 1842.9628 | 1843.9582   | 0.9953    | -1.0034 | -4.34  | 3.727 | 0.522 | 0     | 1   | 31 | 60  | 2  | 0 | 1 |   |
| Q5V741_HALMA | 1 | Zinc-transporting ATPase                                   | <i>zntA1</i>    | pNG6081  | 894 | 14.1 | 9 | 9 | 0.9999 | V | PVDEVAVGDVVVVKPGEK         | I          | 2         | 1835.0040 | 1836.2854   | 1.2814    | -1.0034 | 151.54 | 4.285 | 0.509 | 0     | 1   | 20 | 34  | 1  | 0 | 1 |   |
| Q5V741_HALMA | 1 | Zinc-transporting ATPase                                   | <i>zntA1</i>    | pNG6081  | 894 | 14.1 | 9 | 9 | 1      | K | RDDTTVTVPDEVAVGDVVVVKPGEK  | I          | 3         | 2752.4130 | 2754.4282   | 2.0151    | -2.0067 | 3.07   | 7.048 | 0.455 | 0     | 1   | 35 | 100 | 2  | 0 | 1 |   |
| Q5V844_HALMA | 1 | Hypothetical protein                                       | <i>pNG2015</i>  | pNG2015  | 204 | 23   | 3 | 9 | 1      | W | VVYIDTSSDSSATLGR           | W          | 2         | 1669.8159 | 1669.8181   | 0.0022    | 0       | 1.30   | 4.847 | 0.552 | 0     | 1   | 25 | 30  | 2  | 0 | 1 |   |
| Q5V844_HALMA | 1 | Hypothetical protein                                       | <i>pNG2015</i>  | pNG2015  | 204 | 23   | 3 | 9 | 0.9162 | R | SDSNKVLSSAGGPD SRLNLSAATVR | V          | 3         | 2529.2783 | 2529.2851   | 0.0067    | 0       | 2.66   | 3.009 | 0.053 | 0.9   | 2   | 28 | 96  | 2  | 2 | 1 |   |
| Q5V844_HALMA | 1 | Hypothetical protein                                       | <i>pNG2015</i>  | pNG2015  | 204 | 23   | 3 | 9 | 1      | R | VVYIDTSSDSSATLGR           | W          | 2         | 1669.8159 | 1669.8218   | 0.0058    | 0       | 3.49   | 3.683 | 0.473 | 0     | 1   | 22 | 30  | 2  | 0 | 1 |   |
| Q5V844_HALMA | 1 | Hypothetical protein                                       | <i>pNG2015</i>  | pNG2015  | 204 | 23   | 3 | 9 | 1      | R | VVYIDTSSDSSATLGR           | W          | 2         | 1669.8159 | 1669.8198   | 0.0039    | 0       | 2.32   | 4.292 | 0.549 | 0     | 1   | 25 | 30  | 2  | 0 | 1 |   |
| Q5V844_HALMA | 1 | Hypothetical protein                                       | <i>pNG2015</i>  | pNG2015  | 204 | 23   | 3 | 9 | 1      | R | VVYIDTSSDSSATLGR           | W          | 2         | 1669.8159 | 1669.8178   | 0.0019    | 0       | 1.15   | 3.722 | 0.468 | 0     | 1   | 25 | 30  | 2  | 0 | 1 |   |
| Q5V844_HALMA | 1 | Hypothetical protein                                       | <i>pNG2015</i>  | pNG2015  | 204 | 23   | 3 | 9 | 1      | R | VVYIDTSSDSSATLGR           | W          | 2         | 1669.8159 | 1669.8183   | 0.0024    | 0       | 1.44   | 4.446 | 0.552 | 0     | 1   | 25 | 30  | 2  | 0 | 1 |   |
| Q5V844_HALMA | 1 | Hypothetical protein                                       | <i>pNG2015</i>  | pNG2015  | 204 | 23   | 3 | 9 | 1      | R | VVYIDTSSDSSATLGRWEGPDV     | -          | 2         | 2353.1074 | 2353.1041   | -0.0033   | 0       | -1.41  | 5.409 | 0.552 | 0     | 1   | 26 | 42  | 2  | 1 | 1 |   |
| Q5V844_HALMA | 1 | Hypothetical protein                                       | <i>pNG2015</i>  | pNG2015  | 204 | 23   | 3 | 9 | 1      | R | VVYIDTSSDSSATLGRWEGPDV     | -          | 2         | 2353.1074 | 2353.1163   | 0.0089    | 0       | 3.78   | 5.179 | 0.594 | 0     | 1   | 26 | 42  | 2  | 1 | 1 |   |
| Q5UX87_HALMA | 1 | Hypothetical protein                                       | <i>rmaC3437</i> | rmaC3437 | 426 | 13.4 | 5 | 8 | 1      | R | LKSEFDLGDAAVSDIEQQR        | A          | 3         | 2049.0014 | 2049.0067   | 0.0053    | 0       | 2.59   | 4.163 | 0.376 | 0     | 1   | 34 | 72  | 2  | 1 | 1 |   |
| Q5UX87_HALMA | 1 | Hypothetical protein                                       | <i>rmaC3437</i> | rmaC3437 | 426 | 13.4 | 5 | 8 | 0.9999 | K | KLSDADVVEFVGGRDEVR         | I          | 3         | 1874.9800 | 1874.9926   | 0.0076    | 0       | 4.06   | 3.616 | 0.266 | 0.1   | 6   | 23 | 64  | 2  | 1 | 1 |   |
| Q5UX87_HALMA | 1 | Hypothetical protein                                       | <i>rmaC3437</i> | rmaC3437 | 426 | 13.4 | 5 | 8 | 0.9824 | K | LSADVVVEFVGGRDEVR          | I          | 3         | 1746.8950 | 1746.8924   | 0.0024    | 0       | 1.37   | 2.511 | 0.172 | 0.8   | 10  | 23 | 60  | 2  | 1 | 1 |   |
| Q5UX87_HALMA | 1 | Hypothetical protein                                       | <i>rmaC3437</i> | rmaC3437 | 426 | 13.4 | 5 | 8 | 0.9976 | K | RLSLQGLR                   | E          | 2         | 941.5770  | 941.5786    | 0.0016    | 0       | 1.66   | 2.85  | 0.045 | 0.4   | 4   | 12 | 14  | 2  | 0 | 1 |   |
| Q5UXK7_HALMA | 1 | Epoxide hydrolase-related protein                          | <i>yfhM</i>     | rmaC3304 | 313 | 17.9 | 3 | 8 | 0.9905 | R | LPAASHWVQFDAPEQVSELLSHLP   | -          | 3         | 2783.4282 | 2783.4340   | 0.0058    | 0       | 2.07   | 2.936 | 0.112 | 0.2   | 5   | 25 | 96  | 2  | 0 | 1 |   |
| Q5UXK7_HALMA | 1 | Epoxide hydrolase-related protein                          | <i>yfhM</i>     | rmaC3304 | 313 | 17.9 | 3 | 8 | 0.9967 | K | HQLPALADAGYR               | V          | 2         | 1310.6731 | 1310.6654   | -0.0077   | 0       | -5.86  | 2.178 | 0.189 | 0.1   | 3   | 13 | 22  | 2  | 0 | 1 |   |
| Q5UXK7_HALMA | 1 | Epoxide hydrolase-related protein                          | <i>yfhM</i>     | rmaC3304 | 313 | 17.9 | 3 | 8 | 1      | R | ILTDGTPRPDAFTETDVR         | Y          | 3         | 2159.0971 | 2159.1009   | 0.0038    | 0       | 1.75   | 3.18  | 0.388 | 0     | 7   | 24 | 72  | 2  | 0 | 1 |   |
| Q5UXK7_HALMA | 1 | Epoxide hydrolase-related protein                          | <i>yfhM</i>     | rmaC3304 | 313 | 17.9 | 3 | 8 | 0.9962 | R | ILTDGTPRPDAFTETDVR         | Y          | 3         | 2159.0971 | 2159.0974   | 0.0003    | 0       | 0.14   | 2.769 | 0.162 | 0.4   | 10  | 24 | 72  | 2  | 0 | 1 |   |
| Q5UXK7_HALMA | 1 | Epoxide hydrolase-related protein                          | <i>yfhM</i>     | rmaC3304 | 313 | 17.9 | 3 | 8 | 1      | R | LPAASHWVQFDAPEQVSELLSHLP   | -          | 3         | 2783.4282 | 2783.4387   | 0.0105    | 0       | 3.78   | 3.693 | 0.353 | 0     | 1   | 28 | 96  | 2  | 0 | 1 |   |
| Q5UXK7_HALMA | 1 | Epoxide hydrolase-related protein                          | <i>yfhM</i>     | rmaC3304 | 313 | 17.9 | 3 | 8 | 0.9993 | R | LPAASHWVQFDAPEQVSELLSHLP   | -          | 3         | 2783.4282 | 2783.4285   | 0.0003    | 0       | 0.09   | 3.639 | 0.17  | 0.3   | 4   | 26 | 96  | 2  | 0 | 1 |   |
| Q5UXK7_HALMA | 1 | Epoxide hydrolase-related protein                          | <i>yfhM</i>     | rmaC3304 | 313 | 17.9 | 3 | 8 | 0.9949 | R | LPAASHWVQFDAPEQVSELLSHLP   | -          | 4         | 2783.4282 | 2783.4345   | 0.0063    | 0       | 2.26   | 2.819 | 0.075 | 1.7   | 3   | 34 | 144 | 2  | 0 | 1 |   |
| Q5UXK7_HALMA | 1 | Epoxide hydrolase-related protein                          | <i>yfhM</i>     | rmaC3304 | 313 | 17.9 | 3 | 8 | 0.9426 | R | LPAASHWVQFDAPEQVSELLSHLP   | -          | 4         | 2783.4282 | 2785.4509   | 2.0227    | -2.0067 | 5.74   | 3.181 | 0.145 | 1     | 117 | 29 | 144 | 2  | 0 | 1 |   |
| Q5UXM6_HALMA | 1 | Hypothetical protein                                       | <i>rmaC3283</i> | rmaC3283 | 258 | 9.7  | 1 | 8 | 1      | Q | RVSGNNEEFSDTAHHYTEESQAAR   | Q          | 4         | 2863.2393 | 2863.2446   | 0.0053    | 0       | 1.83   | 3.497 | 0.495 | 0     | 1   | 37 | 144 | 2  | 1 | 1 |   |
| Q5UXM6_HALMA | 1 | Hypothetical protein                                       | <i>rmaC3283</i> | rmaC3283 | 258 | 9.7  | 1 | 8 | 1      | R | RVSGNNEEFSDTAHHYTEESQAAR   | Q          | 3         | 2863.2393 | 2863.2427   | 0.0034    | 0       | 1.18   | 5.03  | 0.506 | 0     | 1   | 33 | 96  | 2  | 1 | 1 |   |
| Q5UXM6_HALMA | 1 | Hypothetical protein                                       | <i>rmaC3283</i> | rmaC3283 | 258 | 9.7  | 1 | 8 | 1      | R | RVSGNNEEFSDTAHHYTEESQAAR   | Q          | 4         | 2863.2393 | 2863.2453   | 0.0060    | 0       | 2.09   | 2.542 | 0.444 | 0.1   | 1   | 40 | 144 | 2  | 1 | 1 |   |
| Q5UXM6_HALMA | 1 | Hypothetical protein                                       | <i>rmaC3283</i> | rmaC3283 | 258 | 9.7  | 1 | 8 | 1      | R | RVSGNNEEFSDTAHHYTEESQAAR   | Q          | 3         | 2863.2393 | 2863.2410   | 0.0017    | 0       | 0.60   | 5.358 | 0.535 | 0     | 1   | 34 | 96  | 2  | 1 | 1 |   |
| Q5UXM6_HALMA | 1 | Hypothetical protein                                       | <i>rmaC3283</i> | rmaC3283 | 258 | 9.7  | 1 | 8 | 1      | R | RVSGNNEEFSDTAHHYTEESQAAR   | Q          | 3         | 2863.2393 | 2863.2451   | 0.0058    | 0       | 2.01   | 4.938 | 0.473 | 0     | 1   | 32 | 96  | 2  | 1 | 1 |   |
| Q5UXM6_HALMA | 1 | Hypothetical protein                                       | <i>rmaC3283</i> | rmaC3283 | 258 | 9.7  | 1 | 8 | 0.9997 | R | RVSGNNEEFSDTAHHYTEESQAAR   | Q          | 3         | 2863.2393 | 2864.2333   | 0.9940    | -1.0034 | -3.27  | 4.297 | 0.236 | 0.1   | 1   | 27 | 96  | 2  | 1 | 1 |   |
| Q5UXM6_HALMA | 1 | Hypothetical protein                                       | <i>rmaC3283</i> | rmaC3283 | 258 | 9.7  | 1 | 8 | 0.9483 | R | RVSGNNEEFSDTAHHYTEESQAAR   | Q          | 5         | 2863.2393 | 2863.2461   | 0.0068    | 0       | 2.36   | 3.013 | 0.013 | 4.6   | 11  | 47 | 192 | 2  | 1 | 1 |   |
| Q5UXT6_HALMA | 1 | Protein-export membrane protein SecF                       | <i>secF</i>     | rmaC3214 | 311 | 15.1 | 4 | 8 | 1      | A | R                          | SGGFYESTYR | A         | 2         | 1165.5040   | 1165.5049 | 0.0008  | 0      | 0.71  | 3.521 | 0.525 | 0   | 1  | 16  | 18 | 2 | 0 | 1 |
| Q5UXT6_HALMA | 1 | Protein-export membrane protein SecF                       | <i>secF</i>     | rmaC3214 | 311 | 15.1 | 4 | 8 | 1      | R | DNTFDEPVVSQQVEGENR         | Y          | 2         | 2160.9923 | 2161.0035   | 0.0112    | 0       | 5.18   | 5.516 | 0.534 | 0     | 1   | 24 | 36  | 2  | 0 | 1 |   |
| Q5UXT6_HALMA | 1 | Protein-export membrane protein SecF                       | <i>secF</i>     | rmaC3214 | 311 | 15.1 | 4 | 8 | 1      | R | DNTFDEPVVSQQVEGENR         | Y          | 2         | 2160.9923 | 2160.9925   | 0.0002    | 0       | 0.09   | 5.339 | 0.51  | 0     | 1   | 24 | 36  | 2  | 0 | 1 |   |
| Q5UXT6_HALMA | 1 | Protein-export membrane protein SecF                       | <i>secF</i>     | rmaC3214 | 311 | 15.1 | 4 | 8 | 1      | V | MFEFEVPEVDYTYQYSNR         | Q          | 2         | 2152.9411 | 2152.9352   | -0.0060   | 0       | -2.77  | 4.555 | 0.523 | 0     | 1   | 24 | 32  | 1  | 0 | 1 |   |
| Q5UXT6_HALMA | 1 | Protein-export membrane protein SecF                       | <i>secF</i>     | rmaC3214 | 311 | 15.1 | 4 | 8 | 1      | Q | 2                          | 2152.9411  | 2153.9454 | 1.0043    | -1.0034     | 0.45      | 5.076   | 0.599  | 0     | 1     | 26    | 32  | 1  | 0   | 1  |   |   |   |
| Q5UXT6_HALMA | 1 | Protein-export membrane protein SecF                       | <i>secF</i>     | rmaC3214 | 311 | 15.1 | 4 | 8 | 1      | V | MFEFEVPEVDYTYQYSNR         | Q          | 2         | 2152.9411 | 2153.9454   | 1.0043    | -1.0034 | 0.45   | 4.985 | 0.597 | 0     | 1   | 24 | 32  | 1  | 0 | 1 |   |
| Q5UXT6_HALMA | 1 | Protein-export membrane protein SecF                       | <i>secF</i>     | rmaC3214 | 311 | 15.1 | 4 | 8 | 0.9999 | Q | 2                          | 2152.9411  | 2153.9454 | 1.0043    | -1.0034     | 0.45      | 4.423   | 0.459  | 0     | 1     | 24    | 32  | 1  | 0   | 1  |   |   |   |
| Q5UXT6_HALMA | 1 | Protein-export membrane protein SecF                       | <i>secF</i>     | rmaC3214 | 311 | 15.1 | 4 | 8 | 1      | R | RSGGFYESTYR                | A          | 2         | 1321.6051 | 1321.6050   | -0.0002   | 0       | -0.13  | 3.525 | 0.413 | 0     | 1   | 16 | 20  | 2  | 0 | 1 |   |
| Q5UY15_HALMA | 1 | Branched-chain amino acid ABC transporter permease protein | <i>livM-6</i>   | rmaC3129 | 363 | 8.8  | 2 | 8 | 0.9947 | R | ILHSPYGTVFR                | A          | 3         | 1288.6928 | 1288.6940   | 0.0011    | 0       | 0.88   | 2.488 | 0.175 | 0.5   | 68  | 19 | 40  | 2  | 0 | 1 |   |
| Q5UY15_HALMA | 1 | Branched-chain amino acid ABC transporter permease protein | <i>livM-6</i>   | rmaC3129 | 363 | 8.8  | 2 | 8 | 1      | R | DATATAAADTDAEVTGGLADR      | W          | 2         | 1990.9079 | 1990.9143   | 0.0064    | 0       | 3.19   | 5.624 | 0.541 | 0     | 1   | 30 | 40  | 2  | 0 | 1 |   |
| Q5UY15_HALMA | 1 | Branched-chain amino acid ABC transporter permease protein | <i>livM-6</i>   | rmaC3129 | 363 | 8.8  | 2 | 8 | 1      | R | DATATAAADTDAEVTGGLADR      | W          | 2         | 1990.9079 | 1990.9120   | 0.0040    | 0       | 2.03   | 4.519 | 0.503 | 0     | 1   | 27 | 40  | 2  | 0 | 1 |   |
| Q5UY15_HALMA | 1 | Branched-chain amino acid ABC transporter permease protein | <i>livM-6</i>   | rmaC3129 | 363 | 8.8  | 2 | 8 | 1      | R | ILHSPYGTVFR                | A          | 3         | 1288.6928 | 1288.6928   | -0.0001   | 0       | -0.04  | 2.745 | 0.329 | 0     | 3   | 24 | 40  | 2  | 0 | 1 |   |
| Q5UY15_HALMA | 1 | Branched-chain amino acid ABC transporter permease protein | <i>livM-6</i>   | rmaC3129 | 363 | 8.8  | 2 | 8 | 0.9998 | R | ILHSPYGTVFR                | A          | 3         | 1288.6928 | 1288.6943   | 0.0015    | 0       | 1.17   | 2.937 | 0.22  | 0.4   | 11  | 22 | 40  | 2  | 0 | 1 |   |
| Q5UY15_HALMA | 1 | Branched-chain amino acid ABC transporter permease protein | <i>livM-6</i>   | rmaC3129 | 363 | 8.8  | 2 | 8 | 0.9996 | R | ILHSPYGTVFR                | A          | 3         | 1288.6928 | 1288.6930   | 0.0002    | 0       | 0.17   | 2.878 | 0.2   | 0.5   | 6   | 21 | 40  | 2  | 0 | 1 |   |
| Q5UY15_HALMA | 1 | Branched-chain amino acid ABC transporter permease protein | <i>livM-6</i>   | rmaC3129 | 363 | 8.8  | 2 | 8 | 0.9951 | R | ILHSPYGTVFR                | A          | 2         | 1288.6928 | 1288.6926   | -0.0002   | 0       | -0.17  | 1.962 | 0.19  | 0     | 2   | 14 | 20  | 2  | 0 | 1 |   |
| Q5UYK0_HALMA | 1 | Hypothetical protein                                       | <i>rmaC2913</i> | rmaC2913 | 337 | 18.1 | 5 | 8 | 1      | R | GYLNTNAAEGLAGWIGK          | R          | 2         | 1732.9148 | 1732.9254   | 0.0106    | 0       | 6.13   | 4.846 | 0.528 | 0     | 1   | 26 | 32  | 2  | 0 | 1 |   |
| Q5UYK0_HALMA | 1 | Hypothetical protein                                       | <i>rmaC2913</i> | rmaC2913 | 337 | 18.1 | 5 | 8 | 1      | R | GYLNTNAAEGLAGWIGK          | R          | 2         | 1732.9148 | 1732.9254</ |           |         |        |       |       |       |     |    |     |    |   |   |   |

|              |   |                                            |          |          |     |      |   |   |        |   |                                    |   |   |           |           |         |         |       |       |       |     |    |    |     |   |   |   |
|--------------|---|--------------------------------------------|----------|----------|-----|------|---|---|--------|---|------------------------------------|---|---|-----------|-----------|---------|---------|-------|-------|-------|-----|----|----|-----|---|---|---|
| QSV5B5_HALMA | 1 | Hypothetical protein                       | rmAC0221 | rmAC0228 | 90  | 64.4 | 4 | 8 | 0.9744 | R | VLAKVESFDDGHEHR                    | G | 4 | 1600.7845 | 1600.7861 | 0.0016  | 0       | 0.97  | 1.787 | 0.137 | 1.7 | 32 | 25 | 78  | 2 | 1 | 1 |
| QSV5B5_HALMA | 1 | Hypothetical protein                       | rmAC0228 | rmAC0228 | 90  | 64.4 | 4 | 8 | 0.9999 | K | FLTGMSFR                           | S | 2 | 957.4742  | 957.4733  | -0.0009 | 0       | -0.96 | 2.284 | 0.33  | 0   | 1  | 13 | 14  | 2 | 0 | 1 |
| QSV5B5_HALMA | 1 | Hypothetical protein                       | rmAC0228 | rmAC0228 | 90  | 64.4 | 4 | 8 | 0.9954 | K | FLTGMSFR                           | S | 2 | 957.4742  | 957.4708  | -0.0034 | 0       | -3.58 | 1.884 | 0.199 | 0.4 | 4  | 12 | 14  | 2 | 0 | 1 |
| QSV5B5_HALMA | 1 | Hypothetical protein                       | rmAC0228 | rmAC0228 | 90  | 64.4 | 4 | 8 | 1      | R | STPTTFEAGEIEEVYVTELDEESGELVAQVGETR | L | 3 | 3713.7319 | 3715.7482 | 2.0162  | -2.0067 | 2.57  | 5.361 | 0.476 | 0   | 1  | 30 | 132 | 2 | 0 | 1 |
| QSV5B5_HALMA | 1 | Hypothetical protein                       | rmAC0228 | rmAC0228 | 90  | 64.4 | 4 | 8 | 1      | R | STPTTFEAGEIEEVYVTELDEESGELVAQVGETR | L | 3 | 3713.7319 | 3713.7405 | 0.0086  | 0       | 2.31  | 5.251 | 0.413 | 0   | 1  | 32 | 132 | 2 | 0 | 1 |
| QSV5B5_HALMA | 1 | Hypothetical protein                       | rmAC0228 | rmAC0228 | 90  | 64.4 | 4 | 8 | 0.9953 | R | STPTTFEAGEIEEVYVTELDEESGELVAQVGETR | L | 3 | 3713.7319 | 3713.7530 | 0.0210  | 0       | 5.66  | 3.37  | 0.153 | 0.5 | 44 | 22 | 132 | 2 | 0 | 1 |
| QSV5B5_HALMA | 1 | Hypothetical protein                       | rmAC0228 | rmAC0228 | 90  | 64.4 | 4 | 8 | 0.9927 | R | VLAKVESFDDGHEHR                    | V | 4 | 1813.9071 | 1813.9103 | 0.0032  | 0       | 1.78  | 1.587 | 0.092 | 1.4 | 2  | 28 | 90  | 2 | 2 | 1 |
| QSV5F2_HALMA | 1 | Putative transporter                       | rmAC0187 | rmAC0187 | 328 | 18.9 | 5 | 8 | 1      | R | DRFSADEIFQR                        | I | 2 | 1382.6579 | 1382.6614 | 0.0034  | 0       | 2.48  | 3.321 | 0.395 | 0   | 2  | 14 | 20  | 2 | 1 | 1 |
| QSV5F2_HALMA | 1 | Putative transporter                       | rmAC0187 | rmAC0187 | 328 | 18.9 | 5 | 8 | 0.9992 | M | ADNEDREEAVRDADVDSR                 | S | 3 | 2044.9410 | 2044.9440 | 0.0030  | 0       | 1.45  | 3.061 | 0.398 | 0   | 1  | 26 | 68  | 2 | 2 | 1 |
| QSV5F2_HALMA | 1 | Putative transporter                       | rmAC0187 | rmAC0187 | 328 | 18.9 | 5 | 8 | 0.9948 | M | ADNEDREEAVRDADVDSR                 | S | 4 | 2044.9410 | 2044.9416 | 0.0006  | 0       | 0.28  | 2.804 | 0.279 | 0.1 | 2  | 32 | 102 | 2 | 2 | 1 |
| QSV5F2_HALMA | 1 | Putative transporter                       | rmAC0187 | rmAC0187 | 328 | 18.9 | 5 | 8 | 1      | R | EWIWWGWSASGR                       | S | 2 | 1390.6418 | 1390.6437 | 0.0018  | 0       | 1.31  | 3.171 | 0.53  | 0   | 1  | 18 | 22  | 2 | 0 | 1 |
| QSV5F2_HALMA | 1 | Putative transporter                       | rmAC0187 | rmAC0187 | 328 | 18.9 | 5 | 8 | 1      | R | FSADEIFQR                          | I | 2 | 1111.5298 | 1111.5254 | -0.0044 | 0       | -3.94 | 2.783 | 0.341 | 0   | 1  | 14 | 16  | 2 | 0 | 1 |
| QSV5F2_HALMA | 1 | Putative transporter                       | rmAC0187 | rmAC0187 | 328 | 18.9 | 5 | 8 | 0.9753 | R | SYVPATDEVPRTPDESRENER              | - | 3 | 2446.1360 | 2446.1422 | 0.0061  | 0       | 2.51  | 2.328 | 0.147 | 0.3 | 1  | 27 | 80  | 2 | 2 | 1 |
| QSV5F8_HALMA | 1 | Na <sup>+</sup> /H <sup>+</sup> antiporter | nhaC5    | rmAC0180 | 717 | 3.9  | 2 | 8 | 1      | R | AGAIQGVLEALVAR                     | A | 2 | 1366.7932 | 1366.7936 | 0.0003  | 0       | 0.24  | 4.369 | 0.425 | 0   | 1  | 22 | 26  | 2 | 0 | 1 |
| QSV5F8_HALMA | 1 | Na <sup>+</sup> /H <sup>+</sup> antiporter | nhaC5    | rmAC0180 | 717 | 3.9  | 2 | 8 | 1      | R | AGAIQGVLEALVAR                     | A | 2 | 1366.7932 | 1366.7955 | 0.0023  | 0       | 1.67  | 4.072 | 0.466 | 0   | 1  | 22 | 26  | 2 | 0 | 1 |
| QSV5F8_HALMA | 1 | Na <sup>+</sup> /H <sup>+</sup> antiporter | nhaC5    | rmAC0180 | 717 | 3.9  | 2 | 8 | 1      | R | AGAIQGVLEALVAR                     | A | 2 | 1366.7932 | 1366.7959 | 0.0026  | 0       | 1.94  | 4.817 | 0.42  | 0   | 1  | 21 | 26  | 2 | 0 | 1 |
| QSV5F8_HALMA | 1 | Na <sup>+</sup> /H <sup>+</sup> antiporter | nhaC5    | rmAC0180 | 717 | 3.9  | 2 | 8 | 1      | R | AGAIQGVLEALVAR                     | A | 2 | 1366.7932 | 1366.7950 | 0.0018  | 0       | 1.31  | 4.769 | 0.435 | 0   | 1  | 22 | 26  | 2 | 0 | 1 |
| QSV5F8       |   |                                            |          |          |     |      |   |   |        |   |                                    |   |   |           |           |         |         |       |       |       |     |    |    |     |   |   |   |

|              |   |                                                       |                  |                  |     |      |   |   |        |   |                                            |           |           |           |           |         |         |        |       |       |     |     |    |     |   |   |   |
|--------------|---|-------------------------------------------------------|------------------|------------------|-----|------|---|---|--------|---|--------------------------------------------|-----------|-----------|-----------|-----------|---------|---------|--------|-------|-------|-----|-----|----|-----|---|---|---|
| Q5V0I0_HALMA | 1 | Hypothetical protein                                  | <i>rrnAC2125</i> | <i>rrnAC2125</i> | 159 | 17   | 2 | 7 | 1      | R | FGGWLAEQQGHPR                              | V         | 2         | 1481.7164 | 1481.7179 | 0.0014  | 0       | 0.98   | 3.019 | 0.333 | 0   | 1   | 18 | 24  | 2 | 0 | 1 |
| Q5V0I0_HALMA | 1 | Hypothetical protein                                  | <i>rrnAC2125</i> | <i>rrnAC2125</i> | 159 | 17   | 2 | 7 | 1      | R | FGGWLAEQQGHPR                              | V         | 3         | 1481.7164 | 1481.7160 | -0.0005 | 0       | -0.31  | 3.1   | 0.295 | 0   | 1   | 24 | 48  | 2 | 0 | 1 |
| Q5V0I0_HALMA | 1 | Hypothetical protein                                  | <i>rrnAC2125</i> | <i>rrnAC2125</i> | 159 | 17   | 2 | 7 | 1      | R | FGGWLAEQQGHPR                              | V         | 2         | 1481.7164 | 1481.7186 | 0.0022  | 0       | 1.47   | 3.087 | 0.362 | 0   | 1   | 18 | 24  | 2 | 0 | 1 |
| Q5V0I0_HALMA | 1 | Hypothetical protein                                  | <i>rrnAC2125</i> | <i>rrnAC2125</i> | 159 | 17   | 2 | 7 | 1      | R | FGGWLAEQQGHPR                              | V         | 3         | 1481.7164 | 1481.7177 | 0.0013  | 0       | 0.86   | 3.392 | 0.244 | 0   | 1   | 25 | 48  | 2 | 0 | 1 |
| Q5V1B6_HALMA | 1 | Phosphoenolpyruvate synthase (EC 2.7.9.2)             | <i>ppsA</i>      | <i>rrnAC1795</i> | 786 | 10.6 | 4 | 7 | 0.9969 | K | GANVPETTEEDKADAGPVETHSAVKPMTGTGEVK         | V         | 4         | 3323.5827 | 3324.5709 | 0.9882  | -1.0034 | -4.57  | 1.97  | 0.151 | 2.2 | 1   | 43 | 186 | 2 | 1 | 1 |
| Q5V1B6_HALMA | 1 | Phosphoenolpyruvate synthase (EC 2.7.9.2)             | <i>ppsA</i>      | <i>rrnAC1795</i> | 786 | 10.6 | 4 | 7 | 0.9758 | K | GANVPETTEEDKADAGPVETHSAVKPMTGTGEVK         | V         | 3         | 3323.5827 | 3324.6026 | 1.0198  | -1.0034 | 4.96   | 2.46  | 0.193 | 0.2 | 1   | 31 | 124 | 2 | 1 | 1 |
| Q5V1B6_HALMA | 1 | Phosphoenolpyruvate synthase (EC 2.7.9.2)             | <i>ppsA</i>      | <i>rrnAC1795</i> | 786 | 10.6 | 4 | 7 | 1      | R | NENDFAHDAVDIAVVVQVMVDAEK                   | S         | 3         | 2656.2439 | 2656.2515 | 0.0076  | 0       | 2.85   | 4.57  | 0.376 | 0   | 1   | 35 | 92  | 2 | 0 | 1 |
| Q5V1B6_HALMA | 1 | Phosphoenolpyruvate synthase (EC 2.7.9.2)             | <i>ppsA</i>      | <i>rrnAC1795</i> | 786 | 10.6 | 4 | 7 | 1      | R | S�DRPGEFKLELR                              | A         | 3         | 1558.8467 | 1558.8460 | -0.0007 | 0       | -0.45  | 3.239 | 0.286 | 0   | 1   | 24 | 48  | 2 | 1 | 1 |
| Q5V1B6_HALMA | 1 | Phosphoenolpyruvate synthase (EC 2.7.9.2)             | <i>ppsA</i>      | <i>rrnAC1795</i> | 786 | 10.6 | 4 | 7 | 1      | R | S�DRPGEFKLELR                              | A         | 3         | 1558.8467 | 1558.8382 | -0.0086 | 0       | -5.49  | 3.158 | 0.307 | 0   | 4   | 21 | 48  | 2 | 1 | 1 |
| Q5V1B6_HALMA | 1 | Phosphoenolpyruvate synthase (EC 2.7.9.2)             | <i>ppsA</i>      | <i>rrnAC1795</i> | 786 | 10.6 | 4 | 7 | 0.9997 | R | S�DRPGEFKLELR                              | A         | 3         | 1558.8467 | 1558.8451 | -0.0016 | 0       | -1.03  | 3.056 | 0.25  | 0.1 | 4   | 21 | 48  | 2 | 1 | 1 |
| Q5V2F8_HALMA | 1 | Hypothetical protein                                  | <i>rrnAC1365</i> | <i>rrnAC1365</i> | 386 | 19.9 | 5 | 7 | 1      | R | WLPLWTLPYSTPOK                             | V         | 2         | 1825.9767 | 1825.9801 | 0.0034  | 0       | 1.84   | 2.705 | 0.406 | 0   | 1   | 21 | 28  | 2 | 0 | 1 |
| Q5V2F8_HALMA | 1 | Hypothetical protein                                  | <i>rrnAC1365</i> | <i>rrnAC1365</i> | 386 | 19.9 | 5 | 7 | 1      | K | DSTVDGYQVYHQTEQGER                         | Q         | 2         | 2225.9461 | 2226.9503 | 1.0042  | -1.0034 | 0.37   | 4.174 | 0.483 | 0   | 1   | 18 | 36  | 2 | 0 | 1 |
| Q5V2F8_HALMA | 1 | Hypothetical protein                                  | <i>rrnAC1365</i> | <i>rrnAC1365</i> | 386 | 19.9 | 5 | 7 | 1      | R | QLTYIGGNEWSYYVR                            | F         | 2         | 1783.8893 | 1784.8254 | 0.9361  | -1.0034 | -37.69 | 3.31  | 0.386 | 0   | 1   | 17 | 28  | 2 | 0 | 1 |
| Q5V2F8_HALMA | 1 | Hypothetical protein                                  | <i>rrnAC1365</i> | <i>rrnAC1365</i> | 386 | 19.9 | 5 | 7 | 1      | R | TEALEVAVIAR                                | G         | 2         | 1170.6608 | 1170.6639 | 0.0031  | 0       | 2.64   | 3.267 | 0.404 | 0   | 1   | 18 | 20  | 2 | 0 | 1 |
| Q5V2F8_HALMA | 1 | Hypothetical protein                                  | <i>rrnAC1365</i> | <i>rrnAC1365</i> | 386 | 19.9 | 5 | 7 | 1      | R | TEALEVAVIAR                                | G         | 2         | 1170.6608 | 1170.6654 | 0.0046  | 0       | 3.95   | 2.783 | 0.36  | 0   | 1   | 16 | 20  | 2 | 0 | 1 |
| Q5V2F8_HALMA | 1 | Hypothetical protein                                  | <i>rrnAC1365</i> | <i>rrnAC1365</i> | 386 | 19.9 | 5 | 7 | 1      | R | TEALEVAVIAR                                | G         | 2         | 1170.6608 | 1170.6628 | 0.0020  | 0       | 1.70   | 3.433 | 0.384 | 0   | 1   | 18 | 20  | 2 | 0 | 1 |
| Q5V2F8_HALMA | 1 | Hypothetical protein                                  | <i>rrnAC1365</i> | <i>rrnAC1365</i> | 386 | 19.9 | 5 | 7 | 0.9981 | R | VROQVDVTQTLRDAQTSE                         | -         | 2         | 1960.9450 | 1960.9571 | 0.0121  | 0       | 6.17   | 2.579 | 0.273 | 0   | 1   | 14 | 32  | 2 | 2 | 1 |
| Q5V331_HALMA | 1 | Sensor protein (EC 2.7.13.3)                          | <i>hutD</i>      | <i>rrnAC1114</i> | 575 | 16.7 | 4 | 7 | 0.9989 | R | NAVEHGSTGGRRPGGDDSTEHGHSRPESDNSVEPAGTGVTIR | V         | 5         | 4125.8721 | 4125.8791 | 0.0070  | 0       | 1.70   | 2.888 | 0.134 | 1.2 | 1   | 60 | 320 | 2 | 0 | 1 |
| Q5V331_HALMA | 1 | Sensor protein (EC 2.7.13.3)                          | <i>hutD</i>      | <i>rrnAC1114</i> | 575 | 16.7 | 4 | 7 | 1      | R | ERNDEPEEFDVVEEAHER                         | M         | 4         | 2155.9519 | 2155.9509 | -0.0010 | 0       | -0.49  | 3.485 | 0.281 | 0.1 | 1   | 38 | 96  | 2 | 2 | 1 |
| Q5V331_HALMA | 1 | Sensor protein (EC 2.7.13.3)                          | <i>hutD</i>      | <i>rrnAC1114</i> | 575 | 16.7 | 4 | 7 | 1      | R | MSSLIDEVLAFAR                              | D         | 2         | 1450.7490 | 1450.7553 | 0.0063  | 0       | 4.36   | 3.752 | 0.509 | 0   | 1   | 22 | 24  | 2 | 0 | 1 |
| Q5V331_HALMA | 1 | Sensor protein (EC 2.7.13.3)                          | <i>hutD</i>      | <i>rrnAC1114</i> | 575 | 16.7 | 4 | 7 | 0.9998 | R | MSSLIDEVLAFAR                              | D         | 3         | 1450.7490 | 1450.7531 | 0.0041  | 0       | 2.81   | 2.924 | 0.219 | 0.3 | 5   | 22 | 48  | 2 | 0 | 1 |
| Q5V331_HALMA | 1 | Sensor protein (EC 2.7.13.3)                          | <i>hutD</i>      | <i>rrnAC1114</i> | 575 | 16.7 | 4 | 7 | 0.9992 | R | NAVEHGSTGGRRPGGDDSTEHGHSRPESDNSVEPAGTGVTIR | V         | 5         | 4125.8721 | 4125.8767 | 0.0046  | 0       | 1.11   | 3.154 | 0.144 | 0.2 | 1   | 69 | 320 | 2 | 0 | 1 |
| Q5V331_HALMA | 1 | Sensor protein (EC 2.7.13.3)                          | <i>hutD</i>      | <i>rrnAC1114</i> | 575 | 16.7 | 4 | 7 | 1      | R | NQQLDQFAA.VLSHDLRNLPSVASGR                 | L         | 4         | 2735.4103 | 2735.4143 | 0.0039  | 0       | 1.44   | 4.4   | 0.303 | 0.1 | 1   | 44 | 144 | 2 | 1 | 1 |
| Q5V331_HALMA | 1 | Sensor protein (EC 2.7.13.3)                          | <i>hutD</i>      | <i>rrnAC1114</i> | 575 | 16.7 | 4 | 7 | 0.9996 | L | 4                                          | 2735.4103 | 2735.4206 | 0.0103    | 0         | 3.76    | 4.202   | 0.148  | 0     | 1     | 43  | 144 | 2  | 1   | 1 |   |   |
| Q5V3A8_HALMA | 1 | ABC transporter ATP-binding protein                   | <i>rrnAC1029</i> | <i>rrnAC1029</i> | 254 | 29.5 | 3 | 7 | 1      | R | ALANRPEIILADEPTGQLDPDTAESVLNLLFSMK         | E         | 3         | 3680.8971 | 3680.9053 | 0.0082  | 0       | 2.22   | 7.672 | 0.618 | 0   | 1   | 51 | 132 | 2 | 0 | 1 |
| Q5V3A8_HALMA | 1 | ABC transporter ATP-binding protein                   | <i>rrnAC1029</i> | <i>rrnAC1029</i> | 254 | 29.5 | 3 | 7 | 1      | R | ALANRPEIILADEPTGQLDPDTAESVLNLLFSMK         | E         | 3         | 3680.8971 | 3680.9057 | 0.0085  | 0       | 2.32   | 8.813 | 0.584 | 0   | 1   | 53 | 132 | 2 | 0 | 1 |
| Q5V3A8_HALMA | 1 | ABC transporter ATP-binding protein                   | <i>rrnAC1029</i> | <i>rrnAC1029</i> | 254 | 29.5 | 3 | 7 | 1      | K | STLFNVGLGLEPPSSGR                          | L         | 2         | 1785.9625 | 1785.9653 | 0.0028  | 0       | 1.56   | 3.806 | 0.49  | 0   | 1   | 22 | 32  | 2 | 0 | 1 |
| Q5V3A8_HALMA | 1 | ABC transporter ATP-binding protein                   | <i>rrnAC1029</i> | <i>rrnAC1029</i> | 254 | 29.5 | 3 | 7 | 1      | K | STLFNVGLGLEPPSSGR                          | L         | 2         | 1785.9625 | 1785.9651 | 0.0025  | 0       | 1.42   | 4.04  | 0.54  | 0   | 1   | 23 | 32  | 2 | 0 | 1 |
| Q5V3A8_HALMA | 1 | ABC transporter ATP-binding protein                   | <i>rrnAC1029</i> | <i>rrnAC1029</i> | 254 | 29.5 | 3 | 7 | 1      | K | STLFNVGLGLEPPSSGR                          | L         | 3         | 1785.9625 | 1785.9684 | 0.0059  | 0       | 3.29   | 3.594 | 0.317 | 0   | 1   | 28 | 64  | 2 | 0 | 1 |
| Q5V3A8_HALMA | 1 | ABC transporter ATP-binding protein                   | <i>rrnAC1029</i> | <i>rrnAC1029</i> | 254 | 29.5 | 3 | 7 | 0.9147 | K | STLFNVGLGLEPPSSGR                          | L         | 3         | 1785.9625 | 1785.9688 | 0.0062  | 0       | 3.50   | 2.674 | 0.016 | 0.6 | 15  | 20 | 64  | 2 | 0 | 1 |
| Q5V3C7_HALMA | 1 | DTDP-glucose 4-6-dehydratase (EC 4.2.1.46)            | <i>rfbB1</i>     | <i>rrnAC1010</i> | 353 | 25.5 | 6 | 7 | 1      | K | LAADFLTMNYNDAYGLPTVTTR                     | M         | 2         | 2446.1838 | 2446.1895 | 0.0057  | 0       | 2.34   | 5.097 | 0.542 | 0   | 1   | 26 | 42  | 2 | 0 | 1 |
| Q5V3C7_HALMA | 1 | DTDP-glucose 4-6-dehydratase (EC 4.2.1.46)            | <i>rfbB1</i>     | <i>rrnAC1010</i> | 353 | 25.5 | 6 | 7 | 0.9998 | R | GHLHVALLGGNGEGQVYVYGENTSMDR                | E         | 4         | 2805.2929 | 2805.2895 | -0.0034 | 0       | -1.22  | 3.011 | 0.224 | 0.3 | 4   | 32 | 150 | 2 | 0 | 1 |
| Q5V3C7_HALMA | 1 | DTDP-glucose 4-6-dehydratase (EC 4.2.1.46)            | <i>rfbB1</i>     | <i>rrnAC1010</i> | 353 | 25.5 | 6 | 7 | 1      | R | YITGTITITQALER                             | D         | 2         | 1477.8140 | 1479.8254 | 2.0114  | -2.0067 | 3.20   | 3.737 | 0.372 | 0   | 1   | 20 | 24  | 2 | 0 | 1 |
| Q5V3C7_HALMA | 1 | DTDP-glucose 4-6-dehydratase (EC 4.2.1.46)            | <i>rfbB1</i>     | <i>rrnAC1010</i> | 353 | 25.5 | 6 | 7 | 0.9695 | R | YITGTITITQALERDIVEGLNLPKR                  | R         | 3         | 2684.4749 | 2685.4882 | 1.0132  | -1.0034 | 3.69   | 2.967 | 0.16  | 0.3 | 3   | 22 | 92  | 2 | 1 | 1 |
| Q5V3C7_HALMA | 1 | DTDP-glucose 4-6-dehydratase (EC 4.2.1.46)            | <i>rfbB1</i>     | <i>rrnAC1010</i> | 353 | 25.5 | 6 | 7 | 0.9989 | R | YITGTITITQALERDIVEGLNLPKR                  | D         | 4         | 2840.5760 | 2841.5709 | 0.9949  | -1.0034 | -2.98  | 2.211 | 0.229 | 0.4 | 3   | 35 | 144 | 2 | 1 | 1 |
| Q5V3C7_HALMA | 1 | DTDP-glucose 4-6-dehydratase (EC 4.2.1.46)            | <i>rfbB1</i>     | <i>rrnAC1010</i> | 353 | 25.5 | 6 | 7 | 1      | R | YRPGDSDVLELLVGHEK                          | L         | 3         | 1941.9432 | 1942.9582 | 1.0149  | -1.0034 | 5.97   | 4.412 | 0.345 | 0   | 1   | 33 | 64  | 2 | 0 | 1 |
| Q5V3C7_HALMA | 1 | DTDP-glucose 4-6-dehydratase (EC 4.2.1.46)            | <i>rfbB1</i>     | <i>rrnAC1010</i> | 353 | 25.5 | 6 | 7 | 0.9999 | L | 3                                          | 1941.9432 | 1940.0048 | -1.9384   | 2         | 31.70   | 5.05    | 0.311  | 0     | 1     | 33  | 64  | 2  | 0   | 1 |   |   |
| Q5V407_HALMA | 1 | Trk potassium uptake system protein                   | <i>trkA1</i>     | <i>rrnAC0754</i> | 227 | 22   | 4 | 7 | 1      | R | IGDHAEVFTEITVTPGAPIAGK                     | T         | 3         | 2121.1106 | 2121.1166 | 0.0060  | 0       | 2.82   | 4.161 | 0.29  | 0   | 42  | 24 | 80  | 2 | 0 | 1 |
| Q5V407_HALMA | 1 | Trk potassium uptake system protein                   | <i>trkA1</i>     | <i>rrnAC0754</i> | 227 | 22   | 4 | 7 | 0.9993 | R | IGDHAEVFTEITVTPGAPIAGK                     | T         | 3         | 2121.1106 | 2121.1157 | 0.0051  | 0       | 2.39   | 3.231 | 0.194 | 0.1 | 6   | 25 | 80  | 2 | 0 | 1 |
| Q5V407_HALMA | 1 | Trk potassium uptake system protein                   | <i>trkA1</i>     | <i>rrnAC0754</i> | 227 | 22   | 4 | 7 | 1      | R | LIAEYLYR                                   | A         | 2         | 1039.5702 | 1039.5724 | 0.0021  | 0       | 2.06   | 2.252 | 0.342 | 0   | 1   | 13 | 14  | 2 | 0 | 1 |
| Q5V407_HALMA | 1 | Trk potassium uptake system protein                   | <i>trkA1</i>     | <i>rrnAC0754</i> | 227 | 22   | 4 | 7 | 0.9997 | R | LIAEYLYR                                   | A         | 2         | 1039.5702 | 1039.5654 | -0.0048 | 0       | -4.59  | 2.22  | 0.247 | 0   | 1   | 13 | 14  | 2 | 0 | 1 |
| Q5V407_HALMA | 1 | Trk potassium uptake system protein                   | <i>trkA1</i>     | <i>rrnAC0754</i> | 227 | 22   | 4 | 7 | 0.9997 | R | LIAEYLYR                                   | A         | 2         | 1039.5702 | 1039.5704 | 0.0002  | 0       | 0.18   | 2.06  | 0.267 | 0.1 | 1   | 12 | 14  | 2 | 0 | 1 |
| Q5V407_HALMA | 1 | Trk potassium uptake system protein                   | <i>trkA1</i>     | <i>rrnAC0754</i> | 227 | 22   | 4 | 7 | 0.9764 | R | QIGVNTMQNPQR                               | L         | 2         | 1384.6881 | 1384.6887 | 0.0006  | 0       | 0.41   | 1.893 | 0.146 | 1.8 | 5   | 12 | 22  | 2 | 0 | 1 |
| Q5V451_HALMA | 1 | Na <sup>+</sup> /Ca <sup>2+</sup> -exchanging protein | <i>nce1</i>      | <i>rrnAC0706</i> | 489 | 9.2  | 4 | 7 | 0.9999 | R | EALKHLLGLAGDAVR                            | S         | 3         | 1561.8940 | 1561.8969 | 0.0029  | 0       | 1.86   | 3.041 | 0.295 | 0.4 | 3   | 26 | 56  | 2 | 1 | 1 |
| Q5V451_HALMA | 1 | Na <sup>+</sup> /Ca <sup>2+</sup> -exchanging protein | <i>nce1</i>      | <i>rrnAC0706</i> | 489 | 9.2  | 4 | 7 | 1      | R | EALKHLLGLAGDAVR                            | S         | 3         | 1561.8940 | 1561.8953 | 0.0013  | 0       | 0.81   | 3.703 | 0.284 | 0.1 | 4   | 26 | 56  | 2 | 1 | 1 |
| Q5V451_HALMA | 1 | Na <sup>+</sup> /Ca <sup>2+</sup> -exchanging protein | <i>nce1</i>      | <i>rrnAC0706</i> | 489 | 9.2  | 4 | 7 | 1      | K | HLGLAGDAVR                                 | S         | 2         | 1120.6353 | 1120.6356 | 0.0003  | 0       | 0.24   | 3.13  | 0.454 | 0   | 1   | 19 | 20  | 2 | 0 | 1 |
| Q5V451_HALMA | 1 | Na <sup>+</sup> /Ca <sup>2+</sup> -exchanging protein | <i>nce1</i>      | <i>rrnAC0706</i> | 489 | 9.2  | 4 | 7 | 1      | R | QFTAAEIESASGGGLAR                          | A         | 2         | 1606.7951 | 1606.7961 | 0.0010  | 0       | 0.62   | 4.462 | 0.504 | 0   | 1   | 22 | 30  | 2 | 0 | 1 |
| Q5V451_HALMA | 1 | Na <sup>+</sup> /Ca <sup>2+</sup> -exchanging protein | <i>nce1</i>      | <i>rrnAC0706</i> | 489 | 9.2  | 4 | 7 | 1      | R | QFTAAEIESASGGGLAR                          | A         | 2         | 1606.7951 | 1606.7989 | 0.0038  | 0       | 2.36   | 4.569 | 0.556 | 0   | 1   | 26 | 30  | 2 | 0 | 1 |
| Q5V451_HALMA | 1 | Na <sup>+</sup> /Ca <sup>2+</sup> -exchanging protein | <i>nce1</i>      | <i>rrnAC0706</i> | 489 | 9.2  | 4 | 7 | 0.9999 | - | 2                                          | 149       |           |           |           |         |         |        |       |       |     |     |    |     |   |   |   |



|                  |        |                                                                                     |                  |           |     |      |   |   |        |   |                                  |           |        |           |           |         |         |       |       |       |     |    |    |     |   |   |   |              |
|------------------|--------|-------------------------------------------------------------------------------------|------------------|-----------|-----|------|---|---|--------|---|----------------------------------|-----------|--------|-----------|-----------|---------|---------|-------|-------|-------|-----|----|----|-----|---|---|---|--------------|
| Q5V4H2_HALMA     | 1      | Branched chain amino acid ABC transporter branched chain amino acid-binding protein | <i>livK-1</i>    | rrnAC0566 | 470 | 13.2 | 4 | 6 | 1      | D | PPTDPGSGEVTTITAGDTEYR            | L         | 2      | 2061.9491 | 2061.9447 | -0.0044 | 0       | -2.16 | 4.703 | 0.438 | 0   | 1  | 20 | 38  | 1 | 0 | 1 |              |
| Q5V4H2_HALMA     | 1      | Branched chain amino acid ABC transporter branched chain amino acid-binding protein | <i>livK-1</i>    | rrnAC0566 | 470 | 13.2 | 4 | 6 | 1      | K | YYGDQSLWGLSGLAYK                 | G         | 3      | 1966.9465 | 1966.9488 | 0.0022  | 0       | 1.13  | 5.644 | 0.454 | 0   | 1  | 39 | 64  | 2 | 0 | 1 |              |
| Q5V4H2_HALMA     | 1      | Branched chain amino acid ABC transporter branched chain amino acid-binding protein | <i>livK-1</i>    | rrnAC0566 | 470 | 13.2 | 4 | 6 | 1      | K | YYGDQSLWGLSGLAYK                 | G         | 2      | 1966.9465 | 1966.9538 | 0.0073  | 0       | 3.71  | 5.204 | 0.575 | 0   | 1  | 28 | 32  | 2 | 0 | 1 |              |
| Q5V665_HALMA     | 1      | Probable protease HtpX-like (EC 3.4.24.-)                                           | <i>htpX2</i>     | pNG7291   | 274 | 20.4 | 5 | 6 | 0.9998 | R | FGYVQHMYR                        | R         | 2      | 1135.5597 | 1135.5667 | 0.0070  | 0       | 6.18  | 2.649 | 0.192 | 0   | 1  | 15 | 16  | 2 | 0 | 1 |              |
| Q5V665_HALMA     | 1      | Probable protease HtpX-like (EC 3.4.24.-)                                           | <i>htpX2</i>     | pNG7291   | 274 | 20.4 | 5 | 6 | 0.9972 | R | GAEEMPDDQRFQGYVHQMVR             | R         | 3      | 2264.0102 | 2264.0088 | -0.0014 | 0       | -0.62 | 2.982 | 0.174 | 0.5 | 1  | 24 | 72  | 2 | 1 | 1 |              |
| Q5V665_HALMA     | 1      | Probable protease HtpX-like (EC 3.4.24.-)                                           | <i>htpX2</i>     | pNG7291   | 274 | 20.4 | 5 | 6 | 0.9596 | F | GYVHQMVR                         | R         | 2      | 988.4912  | 988.4937  | 0.0025  | 0       | 2.49  | 2.038 | 0.248 | 0.1 | 1  | 13 | 14  | 1 | 0 | 1 |              |
| Q5V665_HALMA     | 1      | Probable protease HtpX-like (EC 3.4.24.-)                                           | <i>htpX2</i>     | pNG7291   | 274 | 20.4 | 5 | 6 | 1      | R | LMVMDMGVFNPAFAVGR                | K         | 2      | 1706.8306 | 1706.8254 | -0.0052 | 0       | -3.03 | 3.998 | 0.498 | 0   | 1  | 21 | 30  | 2 | 0 | 1 |              |
| Q5V665_HALMA     | 1      | Probable protease HtpX-like (EC 3.4.24.-)                                           | <i>htpX2</i>     | pNG7291   | 274 | 20.4 | 5 | 6 | 1      | R | LMVMDMGVFNPAFAVGR                | K         | 2      | 1706.8306 | 1707.8454 | 1.0148  | -1.0034 | 6.72  | 4.803 | 0.484 | 0   | 1  | 25 | 30  | 2 | 0 | 1 |              |
| Q5V7G2_HALMA     | 1      | ABC transporter ATP-binding protein                                                 | <i>yyrO-1</i>    | pNG5003   | 227 | 34.8 | 5 | 6 | 1      | K | VVLADEPTGNLDSETGR                | Q         | 2      | 1771.8588 | 1771.8604 | 0.0016  | 0       | 0.92  | 5.299 | 0.547 | 0   | 1  | 25 | 32  | 2 | 0 | 2 | Q5V594_HALMA |
| Q5V7G2_HALMA     | 1      | ABC transporter ATP-binding protein                                                 | <i>yyrO-1</i>    | pNG5003   | 227 | 34.8 | 5 | 6 | 1      | R | IADEDDVAIVAVTHDDLVNEYVDR         | T         | 3      | 2685.2769 | 2687.2882 | 2.0112  | -2.0067 | 1.69  | 5.028 | 0.414 | 0   | 1  | 30 | 92  | 2 | 0 | 2 | Q5V594_HALMA |
| Q5V7G2_HALMA     | 1      | ABC transporter ATP-binding protein                                                 | <i>yyrO-1</i>    | pNG5003   | 227 | 34.8 | 5 | 6 | 1      | R | LGLDDRDLDHKPDLSGGQK              | Q         | 4      | 2092.0549 | 2092.0595 | 0.0046  | 0       | 2.20  | 2.613 | 0.332 | 0.1 | 3  | 35 | 108 | 2 | 1 | 1 |              |
| Q5V7G2_HALMA     | 1      | ABC transporter ATP-binding protein                                                 | <i>yyrO-1</i>    | pNG5003   | 227 | 34.8 | 5 | 6 | 1      | R | LGLDDRDLDHKPDLSGGQK              | Q         | 4      | 2092.0549 | 2092.0556 | 0.0007  | 0       | 0.33  | 2.906 | 0.324 | 0   | 2  | 33 | 108 | 2 | 1 | 1 |              |
| Q5V7G2_HALMA     | 1      | ABC transporter ATP-binding protein                                                 | <i>yyrO-1</i>    | pNG5003   | 227 | 34.8 | 5 | 6 | 1      | R | LGLDDRDLDHKPDLSGGQK              | Q         | 3      | 2092.0549 | 2092.0605 | 0.0056  | 0       | 2.67  | 3.089 | 0.366 | 0   | 1  | 27 | 72  | 2 | 1 | 1 |              |
| Q5V7G2_HALMA     | 1      | ABC transporter ATP-binding protein                                                 | <i>yyrO-1</i>    | pNG5003   | 227 | 34.8 | 5 | 6 | 1      | R | LGLDDRDLDHKPDLSGGQK              | Q         | 4      | 2092.0549 | 2092.0576 | 0.0026  | 0       | 1.26  | 2.76  | 0.31  | 0.1 | 1  | 34 | 108 | 2 | 1 | 1 |              |
| Q5V7G2_HALMA     | 1      | ABC transporter ATP-binding protein                                                 | <i>yyrO-1</i>    | pNG5003   | 227 | 34.8 | 5 | 6 | 0.9999 | R | LGLDDRDLDHKPDLSGGQK              | Q         | 4      | 2092.0549 | 2092.0593 | 0.0043  | 0       | 2.08  | 2.799 | 0.316 | 0.1 | 12 | 34 | 108 | 2 | 1 | 1 |              |
| Q5V7G2_HALMA     | 1      | ABC transporter ATP-binding protein                                                 | <i>yyrO-1</i>    | pNG5003   | 227 | 34.8 | 5 | 6 | 1      | R | TVHLVDGTIGR                      | E         | 2      | 1166.6407 | 1166.6411 | 0.0004  | 0       | 0.31  | 2.727 | 0.297 | 0   | 1  | 16 | 20  | 2 | 0 | 2 | Q5V594_HALMA |
| Q5V7G2_HALMA     | 1      | ABC transporter ATP-binding protein                                                 | <i>yyrO-1</i>    | pNG5003   | 227 | 34.8 | 5 | 6 | 0.9998 | R | TVHLVDGTIGR                      | E         | 2      | 1166.6407 | 1166.6418 | 0.0011  | 0       | 0.94  | 2.836 | 0.199 | 0   | 1  | 15 | 20  | 2 | 0 | 2 | Q5V594_HALMA |
| Q5V7G2_HALMA     | 1      | ABC transporter ATP-binding protein                                                 | <i>yyrO-1</i>    | pNG5003   | 227 | 34.8 | 5 | 6 | 0.9995 | R | TVHLVDGTIGR                      | E         | 2      | 1166.6407 | 1166.6396 | -0.0011 | 0       | -0.94 | 2.486 | 0.217 | 0   | 2  | 14 | 20  | 2 | 0 | 2 | Q5V594_HALMA |
| Q5V7G2_HALMA     | 1      | ABC transporter ATP-binding protein                                                 | <i>yyrO-1</i>    | pNG5003   | 227 | 34.8 | 5 | 6 | 1      | K | VVLADEPTGNLDSETGR                | Q         | 2      | 1771.8588 | 1771.8580 | -0.0008 | 0       | -0.46 | 4.463 | 0.578 | 0   | 1  | 25 | 32  | 2 | 0 | 2 | Q5V594_HALMA |
| Q5V7G2_HALMA     | 1      | ABC transporter ATP-binding protein                                                 | <i>yyrO-1</i>    | pNG5003   | 227 | 34.8 | 5 | 6 | 0.9894 | K | VVLADEPTGNLDSETGRQILDEFRR        | I         | 4      | 2829.4257 | 2829.4277 | 0.0020  | 0       | 0.69  | 1.446 | 0.055 | 3.5 | 1  | 31 | 144 | 2 | 1 | 1 |              |
| Q5V7G3_HALMA     | 1      | ABC transporter permease protein                                                    | <i>abcP-1</i>    | pNG5001   | 367 | 20.4 | 4 | 6 | 1      | V | 3458.6226                        | 3459.6051 | 0.9825 | -1.0034   | -6.03     | 5.393   | 0.44    | 0     | 1     | 31    | 124 | 2  | 1  | 1   | 1 | 1 |   |              |
| Q5V7G3_HALMA     | 1      | ABC transporter permease protein                                                    | <i>abcP-1</i>    | pNG5001   | 367 | 20.4 | 4 | 6 | 1      | K | AASEEPVDALRG                     | -         | 2      | 1213.5939 | 1213.5930 | -0.0009 | 0       | -0.77 | 2.962 | 0.421 | 0   | 1  | 16 | 22  | 2 | 1 | 2 | Q5V593_HALMA |
| Q5V7G3_HALMA     | 1      | ABC transporter permease protein                                                    | <i>abcP-1</i>    | pNG5001   | 367 | 20.4 | 4 | 6 | 0.9999 | K | AASEEPVDALRG                     | -         | 2      | 1213.5939 | 1213.5930 | -0.0009 | 0       | -0.77 | 2.847 | 0.397 | 0   | 1  | 17 | 22  | 2 | 1 | 2 | Q5V593_HALMA |
| Q5V7G3_HALMA     | 1      | ABC transporter permease protein                                                    | <i>abcP-1</i>    | pNG5001   | 367 | 20.4 | 4 | 6 | 1      | R | AVLEEGBDAFSSANPDNR               | I         | 2      | 1790.8071 | 1790.8062 | -0.0009 | 0       | -0.49 | 4.309 | 0.475 | 0   | 1  | 27 | 32  | 2 | 0 | 1 |              |
| Q5V7G3_HALMA     | 1      | ABC transporter permease protein                                                    | <i>abcP-1</i>    | pNG5001   | 367 | 20.4 | 4 | 6 | 1      | R | AVLEEGBDAFSSANPDNR               | I         | 2      | 1790.8071 | 1790.8091 | 0.0019  | 0       | 1.08  | 4.006 | 0.508 | 0   | 1  | 25 | 32  | 2 | 0 | 1 |              |
| Q5V7G3_HALMA     | 1      | ABC transporter permease protein                                                    | <i>abcP-1</i>    | pNG5001   | 367 | 20.4 | 4 | 6 | 1      | R | SYSEVYITESTGTR                   | A         | 2      | 1591.7366 | 1591.7383 | 0.0016  | 0       | 1.02  | 3.942 | 0.504 | 0   | 1  | 19 | 26  | 2 | 0 | 1 |              |
| Q5V7G3_HALMA     | 1      | ABC transporter permease protein                                                    | <i>abcP-1</i>    | pNG5001   | 367 | 20.4 | 4 | 6 | 0.9964 | R | SYSEVYITESTGTR                   | A         | 2      | 1591.7366 | 1591.7353 | -0.0013 | 0       | -0.82 | 2.873 | 0.063 | 0.3 | 1  | 17 | 26  | 2 | 0 | 1 |              |
| Q5V7G3_HALMA     | 1      | ABC transporter permease protein                                                    | <i>abcP-1</i>    | pNG5001   | 367 | 20.4 | 4 | 6 | 1      | R | VGTVSYNREDAASETIVGVENPAALYEAQEGR | V         | 3      | 3458.6226 | 3460.6282 | 2.0055  | -2.0067 | -0.33 | 6.516 | 0.547 | 0   | 1  | 45 | 124 | 2 | 1 | 1 |              |
| Q5V859_HALMA     | 1      | Hypothetical protein                                                                | <i>pNG1001</i>   | pNG1001   | 216 | 10.6 | 1 | 6 | 1      | M | SKDDSSSEDEQNPHLHLSKDYDR          | M         | 4      | 2743.1957 | 2743.1982 | 0.0025  | 0       | 0.90  | 6.192 | 0.556 | 0   | 1  | 53 | 132 | 2 | 2 | 1 |              |
| Q5V859_HALMA     | 1      | Hypothetical protein                                                                | <i>pNG1001</i>   | pNG1001   | 216 | 10.6 | 1 | 6 | 1      | M | SKDDSSSEDEQNPHLHLSKDYDR          | M         | 4      | 2743.1957 | 2743.1962 | 0.0005  | 0       | 0.19  | 6.106 | 0.405 | 0   | 1  | 48 | 132 | 2 | 2 | 1 |              |
| Q5V859_HALMA     | 1      | Hypothetical protein                                                                | <i>pNG1001</i>   | pNG1001   | 216 | 10.6 | 1 | 6 | 1      | M | SKDDSSSEDEQNPHLHLSKDYDR          | M         | 4      | 2743.1957 | 2743.2004 | 0.0047  | 0       | 1.70  | 5.713 | 0.468 | 0   | 1  | 47 | 132 | 2 | 2 | 1 |              |
| Q5V859_HALMA     | 1      | Hypothetical protein                                                                | <i>pNG1001</i>   | pNG1001   | 216 | 10.6 | 1 | 6 | 0.9997 | M | SKDDSSSEDEQNPHLHLSKDYDR          | M         | 3      | 2743.1957 | 2743.1969 | 0.0012  | 0       | 0.44  | 3.685 | 0.408 | 0   | 1  | 28 | 88  | 2 | 2 | 1 |              |
| Q5V859_HALMA     | 1      | Hypothetical protein                                                                | <i>pNG1001</i>   | pNG1001   | 216 | 10.6 | 1 | 6 | 0.9994 | M | SKDDSSSEDEQNPHLHLSKDYDR          | M         | 4      | 2743.1957 | 2743.2058 | 0.0100  | 0       | 3.66  | 4.677 | 0.334 | 0   | 1  | 38 | 132 | 2 | 2 | 1 |              |
| UPPP_HALMAReview | 1      | Undecaprenyl-diphosphate (EC 3.6.1.27) (Undecaprenyl pyrophosphatephosphatase)      | <i>uppP</i>      | rrnAC3219 | 270 | 9.3  | 1 | 6 | 0.9991 | R | EIPDGFDAVLVGVLQGLAILPGVSR        | S         | 3      | 2534.4108 | 2536.4033 | 1.9925  | -2.0067 | -5.62 | 3.071 | 0.265 | 0.3 | 14 | 22 | 96  | 2 | 0 | 1 |              |
| UPPP_HALMAReview | 1      | Undecaprenyl-diphosphate (EC 3.6.1.27) (Undecaprenyl pyrophosphatephosphatase)      | <i>uppP</i>      | rrnAC3219 | 270 | 9.3  | 1 | 6 | 1      | R | EIPDGFDAVLVGVLQGLAILPGVSR        | S         | 3      | 2534.4108 | 2534.4102 | -0.0006 | 0       | -0.25 | 3.509 | 0.382 | 0   | 1  | 31 | 96  | 2 | 0 | 1 |              |
| UPPP_HALMAReview | 1      | Undecaprenyl-diphosphate (EC 3.6.1.27) (Undecaprenyl pyrophosphatephosphatase)      | <i>uppP</i>      | rrnAC3219 | 270 | 9.3  | 1 | 6 | 1      | R | EIPDGFDAVLVGVLQGLAILPGVSR        | S         | 3      | 2534.4108 | 2535.4282 | 1.0173  | -1.0034 | 5.52  | 4.061 | 0.441 | 0   | 1  | 34 | 96  | 2 | 0 | 1 |              |
| UPPP_HALMAReview | 1      | Undecaprenyl-diphosphate (EC 3.6.1.27) (Undecaprenyl pyrophosphatephosphatase)      | <i>uppP</i>      | rrnAC3219 | 270 | 9.3  | 1 | 6 | 1      | R | EIPDGFDAVLVGVLQGLAILPGVSR        | S         | 3      | 2534.4108 | 2534.4146 | 0.0037  | 0       | 1.48  | 4.021 | 0.445 | 0   | 1  | 32 | 96  | 2 | 0 | 1 |              |
| UPPP_HALMAReview | 1      | Undecaprenyl-diphosphate (EC 3.6.1.27) (Undecaprenyl pyrophosphatephosphatase)      | <i>uppP</i>      | rrnAC3219 | 270 | 9.3  | 1 | 6 | 1      | R | EIPDGFDAVLVGVLQGLAILPGVSR        | S         | 2      | 2534.4108 | 2534.4122 | 0.0014  | 0       | 0.54  | 4.466 | 0.428 | 0   | 1  | 25 | 48  | 2 | 0 | 1 |              |
| UPPP_HALMAReview | 1      | Undecaprenyl-diphosphate (EC 3.6.1.27) (Undecaprenyl pyrophosphatephosphatase)      | <i>uppP</i>      | rrnAC3219 | 270 | 9.3  | 1 | 6 | 1      | R | EIPDGFDAVLVGVLQGLAILPGVSR        | S         | 3      | 2534.4108 | 2534.4118 | 0.0010  | 0       | 0.40  | 3.897 | 0.427 | 0   | 1  | 30 | 96  | 2 | 0 | 1 |              |
| Q5V1E4_HALMA     | 0.9791 | Transporter possibly hexose                                                         | <i>rrnAC1760</i> | rrnAC1760 | 449 | 2.9  | 1 | 6 | 1      | K | SFEGDIQILADLR                    | T         | 2      | 1475.7620 | 1475.7652 | 0.0032  | 0       | 2.17  | 4.27  | 0.414 | 0   | 1  | 21 | 24  | 2 | 0 | 1 |              |
| Q5V1E4_HALMA     | 0.9791 | Transporter possibly hexose                                                         | <i>rrnAC1760</i> | rrnAC1760 | 449 | 2.9  | 1 | 6 | 1      | K | SFEGDIQILADLR                    | T         | 2      | 1475.7620 | 1475.7652 | 0.0032  | 0       | 2.17  | 3.979 | 0.26  | 0.1 | 1  | 21 | 24  | 2 | 0 | 1 |              |
| Q5V1E4_HALMA     | 0.9791 | Transporter possibly hexose                                                         | <i>rrnAC1760</i> | rrnAC1760 | 449 | 2.9  | 1 | 6 | 1      | K | SFEGDIQILADLR                    | T         | 2      | 1475.7620 | 1475.7641 | 0.0021  | 0       | 1.43  | 4.245 | 0.406 | 0   | 1  | 21 | 24  | 2 | 0 | 1 |              |
| Q5V1E4_HALMA     | 0.9791 | Transporter possibly hexose                                                         | <i>rrnAC1760</i> | rrnAC1760 | 449 | 2.9  | 1 | 6 | 1      | K | SFEGDIQILADLR                    | T         | 2      | 1475.7620 | 1475.7660 | 0.0039  | 0       | 2.67  | 3.831 | 0.186 | 0.2 | 1  | 21 | 24  | 2 | 0 | 1 |              |
| Q5V1E4_HALMA     | 0.9791 | Transporter possibly hexose                                                         | <i>rrnAC1760</i> | rrnAC1760 | 449 | 2.9  | 1 | 6 | 1      | K | SFEGDIQILADLR                    | T         | 2      | 1475.7620 | 1475.7635 | 0.0015  | 0       | 1.02  | 3.834 | 0.216 | 0.1 | 1  | 21 | 24  | 2 | 0 | 1 |              |
| Q5V1E4_HALMA     | 0.9791 | Transporter possibly hexose                                                         | <i>rrnAC1760</i> | rrnAC1760 | 449 | 2.9  | 1 | 6 | 1      | K | SFEGDIQILADLR                    | T         | 2      | 1475.7620 | 1475.7633 | 0.0013  | 0       | 0.85  | 3.948 | 0.404 | 0   | 1  | 21 | 24  | 2 | 0 | 1 |              |
| Q5UW64_HALMA     | 1      | Cell division protein                                                               | <i>ftsZ2</i>     | rmB0325   | 425 | 12.7 | 4 | 5 | 0.9992 | R | TSGTAIEDERLEVR                   | A         | 4      | 1801.9282 | 1801.9284 | 0.0002  | 0       | 0.11  | 2.157 | 0.31  | 0.5 | 74 | 24 | 90  | 2 | 1 | 1 |              |
| Q5UW64_HALMA     | 1      | Cell division protein                                                               | <i>ftsZ2</i>     | rmB0325   | 425 | 12.7 | 4 | 5 | 1      | R | ALAVFAGPPAWLIR                   | D         | 2      | 1480.8554 | 1480.8454 | -0.0100 | 0       | -6.74 | 3.035 | 0.315 | 0   | 1  | 19 | 26  | 2 | 0 | 1 |              |
| Q5UW64_HALMA     | 1      | Cell division protein                                                               | <i>ftsZ2</i>     | rmB0325   | 425 | 12.7 | 4 | 5 | 1      | R | ALAVFAGPPAWLIR                   | D         | 2      | 1480.8554 | 1480.8563 | 0.0009  | 0       | 0.59  | 3.13  | 0.342 | 0   | 1  | 19 | 26  | 2 | 0 | 1 |              |
| Q5UW64_HALMA     | 1      | Cell division protein                                                               | <i>ftsZ2</i>     | rmB0325   | 425 | 12.7 | 4 | 5 | 1      | R | FLGDNADDVDEIEAYNAVETTLRR         | A         | 3      | 2725.2831 | 2726.2882 | 1.0050  | -1.     |       |       |       |     |    |    |     |   |   |   |              |

|              |   |                                             |       |          |     |      |   |   |        |   |                          |   |   |           |           |         |         |        |       |       |     |    |    |    |   |   |   |
|--------------|---|---------------------------------------------|-------|----------|-----|------|---|---|--------|---|--------------------------|---|---|-----------|-----------|---------|---------|--------|-------|-------|-----|----|----|----|---|---|---|
| Q5UY19_HALMA | 1 | Universal stress protein                    | usp33 | rmAC3125 | 132 | 31.8 | 3 | 5 | 1      | V | RTLHLHDFEENPEGASVDQVASVR | R | 3 | 2667.3252 | 2667.3356 | 0.0104  | 0       | 3.89   | 5.078 | 0.435 | 0   | 1  | 29 | 92 | 1 | 1 | 1 |
| Q5UY19_HALMA | 1 | Universal stress protein                    | usp33 | rmAC3125 | 132 | 31.8 | 3 | 5 | 1      | R | GTAIAESITEFPMIDASQVR     | R | 2 | 1987.9884 | 1987.9989 | 0.0105  | 0       | 5.26   | 4.278 | 0.543 | 0   | 1  | 22 | 36 | 2 | 0 | 1 |
| Q5UY19_HALMA | 1 | Universal stress protein                    | usp33 | rmAC3125 | 132 | 31.8 | 3 | 5 | 1      | R | VTLLHDFEENPEGASVDQVASVR  | R | 2 | 2511.2241 | 2511.2454 | 0.0213  | 0       | 8.49   | 3.062 | 0.302 | 0   | 1  | 18 | 44 | 2 | 0 | 1 |
| Q5UY19_HALMA | 1 | Universal stress protein                    | usp33 | rmAC3125 | 132 | 31.8 | 3 | 5 | 0.9424 | R | VTLLHDFEENPEGASVDQVASVR  | R | 3 | 2511.2241 | 2511.2182 | -0.0060 | 0       | -2.37  | 2.688 | 0.049 | 0.4 | 10 | 24 | 88 | 2 | 0 | 1 |
| Q5UZC1_HALMA | 1 | Arsenical pump-driving ATPase (EC 3.6.3.16) | arsA3 | rmAC2592 | 426 | 3.3  | 1 | 5 | 1      | R | LLGLPEFLLEGWIDR          | L | 3 | 1656.8875 | 1657.8682 | 0.9806  | -1.0034 | -13.70 | 4.878 | 0.343 | 0   | 1  | 30 | 52 | 2 | 0 | 1 |
| Q5UZC1_HALMA | 1 | Arsenical pump-driving ATPase (EC 3.6.3.16) | arsA3 | rmAC2592 | 426 | 3.3  | 1 | 5 | 1      | R | LLGLPEFLLEGWIDR          | L | 2 | 1656.8875 | 1656.8907 | 0.0032  | 0       | 1.93   | 3.655 | 0.446 | 0   | 1  | 31 | 26 | 2 | 0 | 1 |
| Q5UZC1_HALMA | 1 | Arsenical pump-driving ATPase (EC 3.6.3.16) | arsA3 | rmAC2592 | 426 | 3.3  | 1 | 5 | 1      | R | LLGLPEFLLEGWIDR          | L | 3 | 1656.8875 | 1657.8947 | 1.0072  | -1.0034 | 2.33   | 5.112 | 0.449 | 0   | 1  | 23 | 52 | 2 | 0 | 1 |
| Q5UZC1_HALMA | 1 | Arsenical pump-driving ATPase (EC 3.6.3.16) | arsA3 | rmAC2592 | 426 | 3.3  | 1 | 5 | 1      | R | LLGLPEFLLEGWIDR          | L | 2 | 1656.8875 | 1656.8883 | 0.0008  | 0       | 0.46   | 3.176 | 0.401 | 0   | 1  | 20 | 26 | 2 | 0 | 1 |
| Q5UZC1_HALMA | 1 | Arsenical pump-driving ATPase (EC 3.6.3.16) | arsA3 | rmAC2592 | 426 | 3.3  | 1 | 5 | 1      | R | LLGLPEFLLEGWIDR          | L | 2 | 1656.8875 | 1656.8854 | -0.0021 | 0       | -1.25  | 3.657 | 0.453 | 0   | 1  | 21 | 26 | 2 | 0 | 1 |
| Q5UZC1_HALMA | 1 | Arsenical pump-driving ATPase (EC 3.6.3.16) | arsA3 | rmAC2592 | 426 | 3.3  | 1 | 5 | 1      | R | LLGLPEFLLEGWIDR          | L | 2 | 1656.8875 | 1656.8883 | 0.0008  | 0       | 0.46   | 3.176 | 0.401 | 0   | 1  | 20 | 26 | 2 | 0 | 1 |
| Q5UZC1_HALMA | 1 | Arsenical pump-driving ATPase (EC 3.6.3.16) | arsA3 | rmAC2592 | 426 | 3.3  | 1 | 5 | 1      | R | LLGLPEFLLEGWIDR          | L | 2 | 1656.8875 | 1656.8854 | -0.0021 | 0       | -1.25  | 3.657 | 0.453 | 0   | 1  | 21 | 26 | 2 | 0 | 1 |
| Q5UZC1_HALMA | 1 | Arsenical pump-driving ATPase (EC 3.6.3.16) | arsA3 | rmAC2592 | 426 | 3.3  | 1 | 5 | 1      | R | LLGLPEFLLEGWIDR          | L | 2 | 1656.8875 | 1656.8883 | 0.0008  | 0       | 0.46   | 3.176 | 0.401 | 0   | 1  | 20 | 26 | 2 | 0 | 1 |
| Q5UZC1_HALMA | 1 | Arsenical pump-driving ATPase (EC 3.6.3.16) | arsA3 | rmAC2592 | 426 | 3.3  | 1 | 5 | 1      | R | LLGLPEFLLEGWIDR          | L | 2 | 1656.8875 | 1656.8854 | -0.0021 | 0       | -1.25  | 3.657 | 0.453 | 0   | 1  | 21 | 26 | 2 | 0 | 1 |
| Q5UZC1_HALMA | 1 | Arsenical pump-driving ATPase (EC 3.6.3.16) | arsA3 | rmAC2592 | 426 | 3.3  | 1 | 5 | 1      | R | LLGLPEFLLEGWIDR          | L | 2 | 1656.8875 | 1656.8883 | 0.0008  | 0       | 0.46   | 3.176 | 0.401 | 0   | 1  | 20 | 26 | 2 | 0 | 1 |
| Q5UZC1_HALMA | 1 | Arsenical pump-driving ATPase (EC 3.6.3.16) | arsA3 | rmAC2592 | 426 | 3.3  | 1 | 5 | 1      | R | LLGLPEFLLEGWIDR          | L | 2 | 1656.8875 | 1656.8854 | -0.0021 | 0       | -1.25  | 3.657 | 0.453 | 0   | 1  | 21 | 26 | 2 | 0 | 1 |
| Q5UZC1_HALMA | 1 | Arsenical pump-driving ATPase (EC 3.6.3.16) | arsA3 | rmAC2592 | 426 | 3.3  | 1 | 5 | 1      | R | LLGLPEFLLEGWIDR          | L | 2 | 1656.8875 | 1656.8883 | 0.0008  | 0       | 0.46   | 3.176 | 0.401 | 0   | 1  | 20 | 26 | 2 | 0 | 1 |
| Q5UZC1_HALMA | 1 | Arsenical pump-driving ATPase (EC 3.6.3.16) | arsA3 | rmAC2592 | 426 | 3.3  | 1 | 5 | 1      | R | LLGLPEFLLEGWIDR          | L | 2 | 1656.8875 | 1656.8854 | -0.0021 | 0       | -1.25  | 3.657 | 0.453 | 0   | 1  | 21 | 26 | 2 | 0 | 1 |
| Q5UZC1_HALMA | 1 | Arsenical pump-driving ATPase (EC 3.6.3.16) | arsA3 | rmAC2592 | 426 | 3.3  | 1 | 5 | 1      | R | LLGLPEFLLEGWIDR          | L | 2 | 1656.8875 | 1656.8883 | 0.0008  | 0       | 0.46   | 3.176 | 0.401 | 0   | 1  | 20 | 26 | 2 | 0 | 1 |
| Q5UZC1_HALMA | 1 | Arsenical pump-driving ATPase (EC 3.6.3.16) | arsA3 | rmAC2592 | 426 | 3.3  | 1 | 5 | 1      | R | LLGLPEFLLEGWIDR          | L | 2 | 1656.8875 | 1656.8854 | -0.0021 | 0       | -1.25  | 3.657 | 0.453 | 0   | 1  | 21 | 26 | 2 | 0 | 1 |
| Q5UZC1_HALMA | 1 | Arsenical pump-driving ATPase (EC 3.6.3.16) | arsA3 | rmAC2592 | 426 | 3.3  | 1 | 5 | 1      | R | LLGLPEFLLEGWIDR          | L | 2 | 1656.8875 | 1656.8883 | 0.0008  | 0       | 0.46   | 3.176 | 0.401 | 0   | 1  | 20 | 26 | 2 | 0 | 1 |
| Q5UZC1_HALMA | 1 | Arsenical pump-driving ATPase (EC 3.6.3.16) | arsA3 | rmAC2592 | 426 | 3.3  | 1 | 5 | 1      | R | LLGLPEFLLEGWIDR          | L | 2 | 1656.8875 | 1656.8854 | -0.0021 | 0       | -1.25  | 3.657 | 0.453 | 0   | 1  | 21 | 26 | 2 | 0 | 1 |
| Q5UZC1_HALMA | 1 | Arsenical pump-driving ATPase (EC 3.6.3.16) | arsA3 | rmAC2592 | 426 | 3.3  | 1 | 5 | 1      | R | LLGLPEFLLEGWIDR          | L | 2 | 1656.8875 | 1656.8883 | 0.0008  | 0       | 0.46   | 3.176 | 0.401 | 0   | 1  | 20 | 26 | 2 | 0 | 1 |
| Q5UZC1_HALMA | 1 | Arsenical pump-driving ATPase (EC 3.6.3.16) | arsA3 | rmAC2592 | 426 | 3.3  | 1 | 5 | 1      | R | LLGLPEFLLEGWIDR          | L | 2 | 1656.8875 | 1656.8854 | -0.0021 | 0       | -1.25  | 3.657 | 0.453 | 0   | 1  | 21 | 26 | 2 | 0 | 1 |
| Q5UZC1_HALMA | 1 | Arsenical pump-driving ATPase (EC 3.6.3.16) | arsA3 | rmAC2592 | 426 | 3.3  | 1 | 5 | 1      | R | LLGLPEFLLEGWIDR          | L | 2 | 1656.8875 | 1656.8883 | 0.0008  | 0       | 0.46   | 3.176 | 0.401 | 0   | 1  | 20 | 26 | 2 | 0 | 1 |
| Q5UZC1_HALMA | 1 | Arsenical pump-driving ATPase (EC 3.6.3.16) | arsA3 | rmAC2592 | 426 | 3.3  | 1 | 5 | 1      | R | LLGLPEFLLEGWIDR          | L | 2 | 1656.8875 | 1656.8854 | -0.0021 | 0       | -1.25  | 3.657 | 0.453 | 0   | 1  | 21 | 26 | 2 | 0 | 1 |
| Q5UZC1_HALMA | 1 | Arsenical pump-driving ATPase (EC 3.6.3.16) | arsA3 | rmAC2592 | 426 | 3.3  | 1 | 5 | 1      | R | LLGLPEFLLEGWIDR          | L | 2 | 1656.8875 | 1656.8883 | 0.0008  | 0       | 0.46   | 3.176 | 0.401 | 0   | 1  | 20 | 26 | 2 | 0 | 1 |
| Q5UZC1_HALMA | 1 | Arsenical pump-driving ATPase (EC 3.6.3.16) | arsA3 | rmAC2592 | 426 | 3.3  | 1 | 5 | 1      | R | LLGLPEFLLEGWIDR          | L | 2 | 1656.8875 | 1656.8854 | -0.0021 | 0       | -1.25  | 3.657 | 0.453 | 0   | 1  | 21 | 26 | 2 | 0 | 1 |
| Q5UZC1_HALMA | 1 | Arsenical pump-driving ATPase (EC 3.6.3.16) | arsA3 | rmAC2592 | 426 | 3.3  | 1 | 5 | 1      | R | LLGLPEFLLEGWIDR          | L | 2 | 1656.8875 | 1656.8883 | 0.0008  | 0       | 0.46   | 3.176 | 0.401 | 0   | 1  | 20 | 26 | 2 | 0 | 1 |
| Q5UZC1_HALMA | 1 | Arsenical pump-driving ATPase (EC 3.6.3.16) | arsA3 | rmAC2592 | 426 | 3.3  | 1 | 5 | 1      | R | LLGLPEFLLEGWIDR          | L | 2 | 1656.8875 | 1656.8854 | -0.0021 | 0       | -1.25  | 3.657 | 0.453 | 0   | 1  | 21 | 26 | 2 | 0 | 1 |
| Q5UZC1_HALMA | 1 | Arsenical pump-driving ATPase (EC 3.6.3.16) | arsA3 | rmAC2592 | 426 | 3.3  | 1 | 5 | 1      | R | LLGLPEFLLEGWIDR          | L | 2 | 1656.8875 | 1656.8883 | 0.0008  | 0       | 0.46   | 3.176 | 0.401 | 0   | 1  | 20 | 26 | 2 | 0 | 1 |
| Q5UZC1_HALMA | 1 | Arsenical pump-driving ATPase (EC 3.6.3.16) | arsA3 | rmAC2592 | 426 | 3.3  | 1 | 5 | 1      | R | LLGLPEFLLEGWIDR          | L | 2 | 1656.8875 | 1656.8854 | -0.0021 | 0       | -1.25  | 3.657 | 0.453 | 0   | 1  | 21 | 26 | 2 | 0 | 1 |
| Q5UZC1_HALMA | 1 | Arsenical pump-driving ATPase (EC 3.6.3.16) | arsA3 | rmAC2592 | 426 | 3.3  | 1 | 5 | 1      | R | LLGLPEFLLEGWIDR          | L | 2 | 1656.8875 | 1656.8883 | 0.0008  | 0       | 0.46   | 3.176 | 0.401 | 0   | 1  | 20 | 26 | 2 | 0 | 1 |
| Q5UZC1_HALMA | 1 | Arsenical pump-driving ATPase (EC 3.6.3.16) | arsA3 | rmAC2592 | 426 | 3.3  | 1 | 5 | 1      | R | LLGLPEFLLEGWIDR          | L | 2 | 1656.8875 | 1656.8854 | -0.0021 | 0       | -1.25  | 3.657 | 0.453 | 0   | 1  | 21 | 26 | 2 | 0 | 1 |
| Q5UZC1_HALMA | 1 | Arsenical pump-driving ATPase (EC 3.6.3.16) | arsA3 | rmAC2592 | 426 | 3.3  | 1 | 5 | 1      | R | LLGLPEFLLEGWIDR          | L | 2 | 1656.8875 | 1656.8883 | 0.0008  | 0       | 0.46   | 3.176 | 0.401 | 0   | 1  | 20 | 26 | 2 | 0 | 1 |
| Q5UZC1_HALMA | 1 | Arsenical pump-driving ATPase (EC 3.6.3.16) | arsA3 | rmAC2592 | 426 | 3.3  | 1 | 5 | 1      | R | LLGLPEFLLEGWIDR          | L | 2 | 1656.8875 | 1656.8854 | -0.0021 | 0       | -1.25  | 3.657 | 0.453 | 0   | 1  | 21 | 26 | 2 | 0 | 1 |
| Q5UZC1_HALMA | 1 | Arsenical pump-driving ATPase (EC 3.6.3.16) | arsA3 | rmAC2592 | 426 | 3.3  | 1 | 5 | 1      | R | LLGLPEFLLEGWIDR          | L | 2 | 1656.8875 | 1656.8883 | 0.0008  | 0       | 0.46   | 3.176 | 0.401 | 0   | 1  | 20 | 26 | 2 | 0 | 1 |
| Q5UZC1_HALMA | 1 | Arsenical pump-driving ATPase (EC 3.6.3.16) | arsA3 | rmAC2592 | 426 | 3.3  | 1 | 5 | 1      | R | LLGLPEFLLEGWIDR          | L | 2 | 1656.8875 | 1656.8854 | -0.0021 | 0       | -1.25  | 3.657 | 0.453 | 0   | 1  | 21 | 26 | 2 | 0 | 1 |
| Q5UZC1_HALMA | 1 | Arsenical pump-driving ATPase (EC 3.6.3.16) | arsA3 | rmAC2592 | 426 | 3.3  | 1 | 5 | 1      | R | LLGLPEFLLEGWIDR          | L | 2 | 1656.8875 | 1656.8883 | 0.0008  | 0       | 0.46   | 3.176 | 0.401 | 0   | 1  | 20 | 26 | 2 | 0 | 1 |
| Q5UZC1_HALMA | 1 | Arsenical pump-driving ATPase (EC 3.6.3.16) | arsA3 | rmAC2592 | 426 | 3.3  | 1 | 5 | 1      | R | LLGLPEFLLEGWIDR          | L | 2 | 1656.8875 | 1656.8854 | -0.0021 | 0       | -1.25  | 3.657 | 0.453 | 0   | 1  | 21 | 26 | 2 | 0 | 1 |
| Q5UZC1_HALMA | 1 | Arsenical pump-driving ATPase (EC 3.6.3.16) | arsA3 | rmAC2592 | 426 | 3.3  | 1 | 5 | 1      | R | LLGLPEFLLEGWIDR          | L | 2 | 1656.8875 | 1656.8883 | 0.0008  | 0       | 0.46   | 3.176 | 0.401 | 0   | 1  | 20 | 26 | 2 | 0 | 1 |
| Q5UZC1_HALMA | 1 | Arsenical pump-driving ATPase (EC 3.6.3.16) | arsA3 | rmAC2592 | 426 | 3.3  | 1 | 5 | 1      | R | LLGLPEFLLEGWIDR          | L | 2 | 1656.8875 | 1656.8854 | -0.0021 | 0       | -1.25  | 3.657 | 0.453 | 0   | 1  | 21 | 26 | 2 | 0 | 1 |
| Q5UZC1_HALMA | 1 | Arsenical pump-driving ATPase (EC 3.6.3.16) | arsA3 | rmAC2592 | 426 | 3.3  | 1 | 5 | 1      | R | LLGLPEFLLEGWIDR          | L | 2 | 1656.8875 | 1656.8883 | 0.0008  | 0       | 0.46   | 3.176 | 0.401 | 0   | 1  | 20 | 26 | 2 | 0 | 1 |
| Q5UZC1_HALMA | 1 | Arsenical pump-driving ATPase (EC 3.6.3.16) | arsA3 | rmAC2592 | 426 | 3.3  | 1 | 5 | 1      | R | LLGLPEFLLEGWIDR          | L | 2 | 1656.8875 | 1656.8854 | -0.0021 | 0       | -1.25  | 3.657 | 0.453 | 0   | 1  | 21 | 26 | 2 | 0 | 1 |
| Q5UZC1_HALMA | 1 | Arsenical pump-driving ATPase (EC 3.6.3.16) | arsA3 | rmAC2592 | 426 | 3.3  | 1 | 5 | 1      | R | LLGLPEFLLEGWIDR          | L | 2 | 1656.8875 | 1656.8883 | 0.0008  | 0       | 0.46   | 3.176 | 0.401 | 0   | 1  | 20 | 26 | 2 | 0 | 1 |
| Q5UZC1_HALMA | 1 | Arsenical pump-driving ATPase (EC 3.6.3.16) | arsA3 | rmAC2592 | 426 | 3.3  | 1 | 5 | 1      | R | LLGLPEFLLEGWIDR          | L | 2 | 1656.8875 | 1656.8854 | -0.0021 | 0       | -1.25  | 3.657 | 0.453 | 0   | 1  | 21 | 26 | 2 | 0 | 1 |
| Q5UZC1_HALMA | 1 | Arsenical pump-driving ATPase (EC 3.6.3.16) | arsA3 | rmAC2592 | 426 | 3.3  | 1 | 5 | 1      | R | LLGLPEFLLEGWIDR          | L | 2 | 1656.8875 | 1656.8883 | 0.0008  | 0       | 0.46   | 3.176 | 0.401 | 0   | 1  | 20 | 26 | 2 | 0 | 1 |
| Q5UZC1_HALMA | 1 | Arsenical pump-driving ATPase (EC 3.6.3.16) | arsA3 | rmAC2592 | 426 | 3.3  | 1 | 5 | 1      | R | LLGLPEFLLEGWIDR          | L | 2 | 1656.8875 | 1656.8854 | -0.0021 | 0       | -1.25  | 3.657 | 0.453 | 0   | 1  | 21 | 26 | 2 | 0 | 1 |
| Q5UZC1_HALMA | 1 | Arsenical pump-driving ATPase (EC 3.6.3.16) | arsA3 | rmAC2592 | 426 | 3.3  | 1 | 5 | 1      | R | LLGLPEFLLEGWIDR          | L | 2 | 1656.8875 | 1656.8883 | 0.0008  | 0       | 0.46   | 3.176 | 0.401 | 0   | 1  | 20 | 26 | 2 | 0 | 1 |
| Q5UZC1_HALMA | 1 | Arsenical pump-driving ATPase (EC 3.6.3.16) | arsA3 | rmAC2592 | 426 | 3.3  | 1 | 5 | 1      | R | LLGLPEFLLEGWIDR          | L | 2 | 1656.8875 | 1656.8854 | -0.0021 | 0       | -1.25  | 3.657 | 0.453 | 0   | 1  | 21 | 26 | 2 | 0 | 1 |
| Q5UZC1_HALMA | 1 | Arsenical pump-driving ATPase (EC 3.6.3.16) | arsA3 | rmAC2592 | 426 | 3.3  | 1 | 5 | 1      | R | LLGLPEFLLEGWIDR          | L | 2 | 1656.8875 | 1656.8883 | 0.0008  | 0       | 0.46   | 3.176 | 0.401 | 0   | 1  | 20 | 26 | 2 | 0 | 1 |
| Q5UZC1_HALMA | 1 | Arsenical pump-driving ATPase (EC 3.6.3.16) | arsA3 | rmAC2592 | 426 | 3.3  | 1 | 5 | 1      | R | LLGLPEFLLEGWIDR          | L | 2 | 1656.8875 | 1656.8854 | -0      |         |        |       |       |     |    |    |    |   |   |   |

|                   |        |                                                                                  |                 |          |     |      |   |   |        |   |                                    |          |         |           |           |         |         |         |       |       |     |     |    |     |   |   |   |
|-------------------|--------|----------------------------------------------------------------------------------|-----------------|----------|-----|------|---|---|--------|---|------------------------------------|----------|---------|-----------|-----------|---------|---------|---------|-------|-------|-----|-----|----|-----|---|---|---|
| RS13_HALMAReview  | 1      | 30S ribosomal protein S13P (HmaS13)                                              | <i>rps13p</i>   | rmAC0058 | 177 | 33.9 | 5 | 5 | 0.9941 | E | RALTELNIGIGHR                      | A        | 3       | 1335.7371 | 1336.7279 | 0.9908  | -1.0034 | -9.39   | 4.614 | 0.23  | 0   | 1   | 29 | 44  | 1 | 1 | 1 |
| RS13_HALMAReview  | 1      | 30S ribosomal protein S13P (HmaS13)                                              | <i>rps13p</i>   | rmAC0058 | 177 | 33.9 | 5 | 5 | 0.9982 | R | VVERVENFADDVPEWMTNHQKDYFTGETTHETGN | D        | 4       | 3994.7704 | 3996.8109 | 2.0405  | -2.0067 | 8.45    | 5.155 | 0.33  | 0   | 1   | 43 | 198 | 1 | 2 | 1 |
| Q5UX64_HALMA      | 0.9998 | Hypothetical protein                                                             | <i>rmAC3463</i> | rmAC3463 | 346 | 11.3 | 2 | 5 | 0.9995 | R | AENTQNAVDETDALDDDLTALLSNYLEDVR     | T        | 3       | 3207.5055 | 3207.5147 | 0.0091  | 0       | 2.85    | 3.102 | 0.19  | 0.2 | 1   | 27 | 112 | 2 | 0 | 1 |
| Q5UX64_HALMA      | 0.9998 | Hypothetical protein                                                             | <i>rmAC3463</i> | rmAC3463 | 346 | 11.3 | 2 | 5 | 0.9999 | R | AENTQNAVDETDALDDDLTALLSNYLEDVR     | T        | 3       | 3207.5055 | 3207.5128 | 0.0073  | 0       | 2.28    | 3.511 | 0.224 | 0.1 | 1   | 29 | 112 | 2 | 0 | 1 |
| Q5UX64_HALMA      | 0.9998 | Hypothetical protein                                                             | <i>rmAC3463</i> | rmAC3463 | 346 | 11.3 | 2 | 5 | 0.9941 | R | TLAIGPFILR                         | E        | 2       | 1099.6753 | 1099.6654 | -0.0099 | 0       | -8.98   | 2.08  | 0.127 | 0.2 | 1   | 15 | 18  | 2 | 0 | 1 |
| Q5UX64_HALMA      | 0.9998 | Hypothetical protein                                                             | <i>rmAC3463</i> | rmAC3463 | 346 | 11.3 | 2 | 5 | 0.9838 | R | TLAIGPFILR                         | E        | 2       | 1099.6753 | 1099.6764 | 0.0010  | 0       | 0.95    | 2.079 | 0.069 | 1.5 | 1   | 15 | 18  | 2 | 0 | 1 |
| Q5UX9_HALMA       | 0.9988 | Hypothetical protein                                                             | <i>rmAC3314</i> | rmAC3314 | 185 | 5.4  | 1 | 5 | 0.9436 | R | WVVRPYIDAK                         | T        | 3       | 1245.6870 | 1245.6882 | 0.0011  | 0       | 0.91    | 1.953 | 0.115 | 1.9 | 51  | 19 | 36  | 2 | 0 | 1 |
| Q5UX9_HALMA       | 0.9988 | Hypothetical protein                                                             | <i>rmAC3314</i> | rmAC3314 | 185 | 5.4  | 1 | 5 | 1      | R | WVVRPYIDAK                         | T        | 2       | 1245.6870 | 1245.6867 | -0.0003 | 0       | -0.23   | 3.268 | 0.271 | 0   | 2   | 14 | 18  | 2 | 0 | 1 |
| Q5UX9_HALMA       | 0.9988 | Hypothetical protein                                                             | <i>rmAC3314</i> | rmAC3314 | 185 | 5.4  | 1 | 5 | 0.9999 | R | WVVRPYIDAK                         | T        | 2       | 1245.6870 | 1245.6882 | 0.0012  | 0       | 0.95    | 2.948 | 0.311 | 0   | 13  | 13 | 18  | 2 | 0 | 1 |
| Q5UX9_HALMA       | 0.9988 | Hypothetical protein                                                             | <i>rmAC3314</i> | rmAC3314 | 185 | 5.4  | 1 | 5 | 0.9997 | R | WVVRPYIDAK                         | T        | 2       | 1245.6870 | 1245.6888 | 0.0018  | 0       | 1.44    | 2.865 | 0.228 | 0.1 | 15  | 13 | 18  | 2 | 0 | 1 |
| Q5UX9_HALMA       | 0.9988 | Hypothetical protein                                                             | <i>rmAC3314</i> | rmAC3314 | 185 | 5.4  | 1 | 5 | 0.9996 | R | WVVRPYIDAK                         | T        | 2       | 1245.6870 | 1245.6874 | 0.0003  | 0       | 0.26    | 2.447 | 0.245 | 0.1 | 3   | 13 | 18  | 2 | 0 | 1 |
| Q5UZ60_HALMA      | 0.9791 | Hypothetical protein                                                             | <i>rmAC2665</i> | rmAC2665 | 324 | 4.6  | 1 | 5 | 1      | R | ALALAPLVLVPLALR                    | T        | 2       | 1529.0068 | 1529.0121 | 0.0052  | 0       | 3.42    | 3.393 | 0.474 | 0   | 1   | 24 | 28  | 2 | 0 | 1 |
| Q5UZ60_HALMA      | 0.9791 | Hypothetical protein                                                             | <i>rmAC2665</i> | rmAC2665 | 324 | 4.6  | 1 | 5 | 1      | R | ALALAPLVLVPLALR                    | T        | 2       | 1529.0068 | 1529.0110 | 0.0041  | 0       | 2.71    | 3.826 | 0.455 | 0   | 1   | 24 | 28  | 2 | 0 | 1 |
| Q5UZ60_HALMA      | 0.9791 | Hypothetical protein                                                             | <i>rmAC2665</i> | rmAC2665 | 324 | 4.6  | 1 | 5 | 1      | R | ALALAPLVLVPLALR                    | T        | 2       | 1529.0068 | 1529.0105 | 0.0036  | 0       | 2.39    | 4.406 | 0.39  | 0   | 1   | 24 | 28  | 2 | 0 | 1 |
| Q5UZ60_HALMA      | 0.9791 | Hypothetical protein                                                             | <i>rmAC2665</i> | rmAC2665 | 324 | 4.6  | 1 | 5 | 1      | R | ALALAPLVLVPLALR                    | T        | 2       | 1529.0068 | 1529.0079 | 0.0011  | 0       | 0.71    | 3.164 | 0.465 | 0   | 1   | 21 | 28  | 2 | 0 | 1 |
| Q5UZ60_HALMA      | 0.9791 | Hypothetical protein                                                             | <i>rmAC2665</i> | rmAC2665 | 324 | 4.6  | 1 | 5 | 0.9967 | R | ALALAPLVLVPLALR                    | T        | 2       | 1529.0068 | 1528.8054 | -0.2014 | 0       | -131.70 | 2.202 | 0.175 | 0.2 | 1   | 15 | 28  | 2 | 0 | 1 |
| Q5V1D2_HALMA      | 0.9791 | Hypothetical protein                                                             | <i>rmAC1775</i> | rmAC1775 | 240 | 5.4  | 1 | 5 | 1      | R | TFLLRPGAFFEQR                      | R        | 3       | 1580.8463 | 1580.8456 | -0.0007 | 0       | -0.46   | 3.129 | 0.391 | 0   | 1   | 29 | 48  | 2 | 0 | 1 |
| Q5V1D2_HALMA      | 0.9791 | Hypothetical protein                                                             | <i>rmAC1775</i> | rmAC1775 | 240 | 5.4  | 1 | 5 | 1      | R | TFLLRPGAFFEQR                      | R        | 3       | 1580.8463 | 1580.8494 | 0.0031  | 0       | 1.98    | 2.477 | 0.375 | 0   | 1   | 29 | 48  | 2 | 0 | 1 |
| Q5V1D2_HALMA      | 0.9791 | Hypothetical protein                                                             | <i>rmAC1775</i> | rmAC1775 | 240 | 5.4  | 1 | 5 | 1      | R | TFLLRPGAFFEQR                      | R        | 3       | 1580.8463 | 1581.8547 | 1.0084  | -1.0034 | 3.18    | 2.984 | 0.342 | 0   | 1   | 29 | 48  | 2 | 0 | 1 |
| Q5V1D2_HALMA      | 0.9791 | Hypothetical protein                                                             | <i>rmAC1775</i> | rmAC1775 | 240 | 5.4  | 1 | 5 | 1      | R | TFLLRPGAFFEQR                      | R        | 3       | 1580.8463 | 1580.8480 | 0.0017  | 0       | 1.05    | 2.885 | 0.427 | 0   | 1   | 27 | 48  | 2 | 0 | 1 |
| Q5V1D2_HALMA      | 0.9791 | Hypothetical protein                                                             | <i>rmAC1775</i> | rmAC1775 | 240 | 5.4  | 1 | 5 | 0.9890 | R | TFLLRPGAFFEQR                      | R        | 3       | 1580.8463 | 1581.8509 | 1.0045  | -1.0034 | 0.75    | 2.511 | 0.201 | 0.1 | 61  | 17 | 48  | 2 | 0 | 1 |
| PCNA_HALMARReview | 1      | DNA polymerase sliding clamp (Proliferating cell nuclear antigenhomolog) (PCNA)  | <i>pcn</i>      | rmAC2851 | 247 | 16.2 | 3 | 4 | 1      | R | DDLIDLTPGDAHSLFSLDYLK              | N        | 3       | 2347.1583 | 2347.1643 | 0.0060  | 0       | 2.56    | 3.528 | 0.34  | 0   | 3   | 27 | 80  | 2 | 0 | 1 |
| PCNA_HALMARReview | 1      | DNA polymerase sliding clamp (Proliferating cell nuclear antigenhomolog) (PCNA)  | <i>pcn</i>      | rmAC2851 | 247 | 16.2 | 3 | 4 | 1      | K | MHFSFAEQGQR                        | V        | 3       | 1265.5611 | 1265.5652 | 0.0041  | 0       | 3.20    | 3.134 | 0.263 | 0.1 | 1   | 22 | 40  | 2 | 0 | 1 |
| PYRB_HALMARReview | 1      | Aspartate carbamoyltransferase (EC 2.1.3.2) (Aspartatetranscarbamylase) (ATCase) | <i>pyrB</i>     | rmAC1225 | 304 | 25.3 | 4 | 4 | 1      | R | GDIEVTLDHAADIAADPGAFADR            | H        | 3       | 2339.1029 | 2339.1152 | 0.0123  | 0       | 5.25    | 3.666 | 0.32  | 0   | 1   | 32 | 88  | 2 | 0 | 1 |
| PYRB_HALMARReview | 1      | Aspartate carbamoyltransferase (EC 2.1.3.2) (Aspartatetranscarbamylase) (ATCase) | <i>pyrB</i>     | rmAC1225 | 304 | 25.3 | 4 | 4 | 0.9051 | R | HSDTLTLLGFEPFSTR                   | T        | 3       | 1831.9468 | 1831.9522 | 0.0054  | 0       | 2.95    | 2.208 | 0.105 | 5.3 | 269 | 19 | 60  | 2 | 0 | 1 |
| PYRB_HALMARReview | 1      | Aspartate carbamoyltransferase (EC 2.1.3.2) (Aspartatetranscarbamylase) (ATCase) | <i>pyrB</i>     | rmAC1225 | 304 | 25.3 | 4 | 4 | 0.9621 | R | VDEIAHDVDETHTAQYFQAHHNGVPVR        | M        | 5       | 3075.4435 | 3076.4636 | 1.0201  | -1.0034 | 5.44    | 2.504 | 0.254 | 1.9 | 92  | 49 | 208 | 2 | 0 | 1 |
| PYRB_HALMARReview | 1      | Aspartate carbamoyltransferase (EC 2.1.3.2) (Aspartatetranscarbamylase) (ATCase) | <i>pyrB</i>     | rmAC1225 | 304 | 25.3 | 4 | 4 | 0.9884 | R | YDLHEAGAGIR                        | E        | 3       | 1200.5887 | 1202.6291 | 2.0404  | -2.0067 | 28.03   | 2.484 | 0.161 | 0.3 | 13  | 19 | 40  | 2 | 0 | 1 |
| Q5UW81_HALMA      | 1      | Hypothetical protein                                                             | <i>rmB0307</i>  | rmB0307  | 318 | 18.6 | 4 | 4 | 0.9989 | K | DGDDLVDWLHR                        | T        | 3       | 1339.6157 | 1340.6182 | 1.0024  | -1.0034 | -0.67   | 3.125 | 0.171 | 0.2 | 4   | 23 | 40  | 2 | 0 | 1 |
| Q5UW81_HALMA      | 1      | Hypothetical protein                                                             | <i>rmB0307</i>  | rmB0307  | 318 | 18.6 | 4 | 4 | 0.9978 | K | DGDDLVDWLHR                        | T        | 3       | 1339.6157 | 1339.6282 | 0.0124  | 0       | 9.29    | 2.642 | 0.131 | 0.3 | 2   | 22 | 40  | 2 | 0 | 1 |
| Q5UW81_HALMA      | 1      | Hypothetical protein                                                             | <i>rmB0307</i>  | rmB0307  | 318 | 18.6 | 4 | 4 | 0.9997 | R | DIGHTIVER                          | S        | 2       | 1014.5709 | 1014.5719 | 0.0009  | 0       | 0.94    | 2.854 | 0.141 | 0.1 | 1   | 15 | 16  | 2 | 0 | 1 |
| Q5UWA4_HALMA      | 1      | Hypothetical protein                                                             | <i>rmB0280</i>  | rmB0280  | 132 | 27.3 | 3 | 4 | 0.9962 | R | YVLAIVR                            | S        | 2       | 832.5171  | 832.5201  | 0.0029  | 0       | 3.52    | 1.733 | 0.197 | 0.9 | 1   | 10 | 12  | 2 | 0 | 1 |
| Q5UWA4_HALMA      | 1      | Hypothetical protein                                                             | <i>rmB0280</i>  | rmB0280  | 132 | 27.3 | 3 | 4 | 0.9994 | R | GALQVTVLGALGDANSR                  | G        | 2       | 1541.8161 | 1541.8221 | 0.0060  | 0       | 3.89    | 2.59  | 0.213 | 0.2 | 1   | 17 | 30  | 2 | 0 | 1 |
| Q5UWA4_HALMA      | 1      | Hypothetical protein                                                             | <i>rmB0280</i>  | rmB0280  | 132 | 27.3 | 3 | 4 | 1      | R | GPVDLHDVLDGIR                      | S        | 3       | 1404.7361 | 1404.7365 | 0.0004  | 0       | 0.27    | 4.279 | 0.419 | 0   | 1   | 25 | 48  | 2 | 0 | 1 |
| Q5UWD9_HALMA      | 1      | 3-hydroxyacyl-CoA dehydrogenase (EC 1.1.1.35)                                    | <i>hhd3</i>     | rmB0238  | 295 | 12.9 | 3 | 4 | 1      | R | DIEADIVLDGTLTAIESNLEEIGAR          | E        | 3       | 2557.2395 | 2558.2582 | 1.0186  | -1.0034 | 5.98    | 5.091 | 0.341 | 0   | 1   | 34 | 92  | 2 | 0 | 1 |
| Q5UWD9_HALMA      | 1      | 3-hydroxyacyl-CoA dehydrogenase (EC 1.1.1.35)                                    | <i>hhd3</i>     | rmB0238  | 295 | 12.9 | 3 | 4 | 0.9999 | R | LDLIEYLRL                          | D        | 2       | 1033.5808 | 1034.5776 | 0.9968  | -1.0034 | -6.35   | 2.855 | 0.266 | 0   | 1   | 13 | 14  | 2 | 0 | 1 |
| Q5UWD9_HALMA      | 1      | 3-hydroxyacyl-CoA dehydrogenase (EC 1.1.1.35)                                    | <i>hhd3</i>     | rmB0238  | 295 | 12.9 | 3 | 4 | 1      | R | LDLIEYLRLDELGER                    | F        | 3       | 1732.8995 | 1732.8944 | -0.0052 | 0       | -2.97   | 3.296 | 0.301 | 0   | 1   | 25 | 52  | 2 | 1 | 1 |
| Q5UWG0_HALMA      | 1      | UDP-glucose 4-epimerase                                                          | <i>galE10</i>   | rmB0210  | 319 | 17.6 | 4 | 4 | 1      | K | LGVDDDDVTIR                        | R        | 2       | 1101.5666 | 1101.5644 | -0.0022 | 0       | -1.99   | 2.601 | 0.326 | 0   | 1   | 16 | 18  | 2 | 0 | 1 |
| Q5UWG0_HALMA      | 1      | UDP-glucose 4-epimerase                                                          | <i>galE10</i>   | rmB0210  | 319 | 17.6 | 4 | 4 | 0.9659 | G | 828.4705                           | 828.4654 | -0.0051 | 0         | -6.13     | 1.997   | 0.137   | 1.1     | 79    | 9     | 14  | 2   | 0  | 1   | 1 |   |   |
| Q5UWG0_HALMA      | 1      | UDP-glucose 4-epimerase                                                          | <i>galE10</i>   | rmB0210  | 319 | 17.6 | 4 | 4 | 1      | R | YVHEDYGVHDVHGLRPTVAYGPYR           | E        | 5       | 2662.2928 | 2662.2903 | -0.0025 | 0       | -0.96   | 3.424 | 0.354 | 0.2 | 1   | 52 | 176 | 2 | 0 | 1 |
| Q5UWG4_HALMA      | 1      | Aspartate aminotransferase (EC 2.6.1.1)                                          | <i>aspC1</i>    | rmB0206  | 372 | 9.9  | 2 | 4 | 0.9994 | R | EAAAMSAIQDGMGDSYTSNK               | G        | 2       | 2006.8299 | 2007.8254 | 0.9955  | -1.0034 | -3.90   | 2.423 | 0.362 | 0   | 1   | 16 | 36  | 2 | 0 | 1 |
| Q5UWG4_HALMA      | 1      | Aspartate aminotransferase (EC 2.6.1.1)                                          | <i>aspC1</i>    | rmB0206  | 372 | 9.9  | 2 | 4 | 0.9996 | R | EAAAMSAIQDGMGDSYTSNK               | G        | 2       | 1974.8299 | 1974.8357 | 0.0057  | 0       | 2.91    | 2.302 | 0.316 | 0.3 | 4   | 13 | 36  | 2 | 0 | 1 |
| Q5UWG4_HALMA      | 1      | Aspartate aminotransferase (EC 2.6.1.1)                                          | <i>aspC1</i>    | rmB0206  | 372 | 9.9  | 2 | 4 | 1      | R | NVLLDGLADIGLDTPVPK                 | G        | 2       | 1849.0197 | 1850.0254 | 1.0057  | -1.0034 | 1.28    | 3.663 | 0.442 | 0   | 1   | 22 | 34  | 2 | 0 | 1 |
| Q5UWG4_HALMA      | 1      | Aspartate aminotransferase (EC 2.6.1.1)                                          | <i>aspC1</i>    | rmB0206  | 372 | 9.9  | 2 | 4 | 1      | R | NVLLDGLADIGLDTPVPK                 | G        | 3       | 1849.0197 | 1850.0182 | 0.9984  | -1.0034 | -2.65   | 3.929 | 0.29  | 0   | 1   | 31 | 68  | 2 | 0 | 1 |
| Q5UX94_HALMA      | 1      | Hypothetical protein                                                             | <i>rmAC3430</i> | rmAC3430 | 278 | 10.4 | 1 | 4 | 1      | R | YAAPTTVFAHMLDGVSTAVGADVIGITER      | T        | 3       | 2959.5113 | 2959.5144 | 0.0031  | 0       | 1.05    | 3.467 | 0.355 | 0.1 | 3   | 25 | 112 | 2 | 0 | 1 |
| Q5UX94_HALMA      | 1      | Hypothetical protein                                                             | <i>rmAC3430</i> | rmAC3430 | 278 | 10.4 | 1 | 4 | 1      | R | YAAPTTVFAHMLDGVSTAVGADVIGITER      | T        | 4       | 2959.5113 | 2960.5309 | 1.0196  | -1.0034 | 5.48    | 4.169 | 0.403 | 0   | 1   | 44 | 168 | 2 | 0 | 1 |
| Q5UX94_HALMA      | 1      | Hypothetical protein                                                             | <i>rmAC3430</i> | rmAC3430 | 278 | 10.4 | 1 | 4 | 1      | R | YAAPTTVFAHMLDGVSTAVGADVIGITER      | T        | 3       | 2959.5113 | 2959.5230 | 0.0117  | 0       | 3.96    | 4.928 | 0.4   | 0   | 1   | 31 | 112 | 2 | 0 | 1 |
| Q5UX94_HALMA      | 1      | Hypothetical protein                                                             | <i>rmAC3430</i> | rmAC3430 | 278 | 10.4 | 1 | 4 | 1      | R | YAAPTTVFAHMLDGVSTAVGADVIGITER      | T        | 4       | 2959.5113 | 2959.5185 | 0.0072  | 0       | 2.43    | 4.361 | 0.434 | 0   | 1   | 47 | 168 | 2 | 0 | 1 |
| Q5UXA4_HALMA      | 1      | Isocitrate dehydrogenase (EC 1.1.1.42)                                           | <i>icd</i>      | rmAC3419 | 420 | 11.7 | 4 | 4 | 1      | K | LATSEFAEKVVVENIEKLA                | -        | 3       | 1990.0622 | 1990.0662 | 0.0040  | 0       | 1.99    | 4.138 | 0.366 | 0   | 1   | 31 | 68  | 2 | 2 | 1 |
| Q5UXA4_HALMA      | 1      | Isocitrate dehydrogenase (EC 1.1.1.42)                                           | <i>icd</i>      | rmAC3419 | 420 | 11.7 | 4 | 4 | 1      | R | IADNMLQQLLTR                       | T        | 2       | 1414.7602 | 1414.7618 | 0.0016  | 0       | 1.12    | 3.45  | 0.357 | 0   | 1   | 19 | 22  | 2 | 0 | 1 |
| Q5UXA4_HALMA      | 1      | Isocitrate dehydrogenase (EC 1.1.1.42)                                           | <i>icd</i>      | rm       |     |      |   |   |        |   |                                    |          |         |           |           |         |         |         |       |       |     |     |    |     |   |   |   |

|              |   |                                           |                  |                  |     |      |   |   |        |   |                           |   |   |           |           |         |         |        |       |         |     |    |    |     |   |   |   |
|--------------|---|-------------------------------------------|------------------|------------------|-----|------|---|---|--------|---|---------------------------|---|---|-----------|-----------|---------|---------|--------|-------|---------|-----|----|----|-----|---|---|---|
| Q5UZS8_HALMA | 1 | Putative peptidase                        | <i>rrnAC2412</i> | <i>rrnAC2412</i> | 238 | 12.6 | 2 | 4 | 1      | R | VLDTEQEGTANVIVR           | G | 2 | 1642.8526 | 1642.8550 | 0.0023  | 0       | 1.42   | 3.771 | 0.423   | 0   | 1  | 20 | 28  | 2 | 0 | 1 |
| Q5UZS8_HALMA | 1 | Putative peptidase                        | <i>rrnAC2412</i> | <i>rrnAC2412</i> | 238 | 12.6 | 2 | 4 | 1      | R | SVDTPDDQTITETLNR          | L | 2 | 1690.7646 | 1690.7654 | 0.0008  | 0       | 0.49   | 4.289 | 0.451   | 0   | 1  | 23 | 28  | 2 | 0 | 1 |
| Q5UZS8_HALMA | 1 | Putative peptidase                        | <i>rrnAC2412</i> | <i>rrnAC2412</i> | 238 | 12.6 | 2 | 4 | 1      | R | SVDTPDDQTITETLNR          | L | 2 | 1690.7646 | 1690.7676 | 0.0029  | 0       | 1.73   | 3.507 | 0.397   | 0   | 1  | 20 | 28  | 2 | 0 | 1 |
| Q5UZS8_HALMA | 1 | Putative peptidase                        | <i>rrnAC2412</i> | <i>rrnAC2412</i> | 238 | 12.6 | 2 | 4 | 1      | R | VLDTEQEGTANVIVR           | G | 2 | 1642.8526 | 1642.8523 | -0.0004 | 0       | -0.22  | 3.696 | 0.435   | 0   | 1  | 21 | 28  | 2 | 0 | 1 |
| Q5V0D3_HALMA | 1 | DTDP-glucose-46-dehydratase (EC 4.2.1.46) | <i>rfbB3</i>     | <i>rrnAC2178</i> | 294 | 11.6 | 2 | 4 | 0.9999 | R | IVDDLTDRLPLMLVPK          | W | 3 | 1853.0383 | 1854.0282 | 0.9898  | -1.0034 | -7.29  | 3.484 | 0.327   | 0   | 3  | 27 | 60  | 2 | 1 | 1 |
| Q5V0D3_HALMA | 1 | DTDP-glucose-46-dehydratase (EC 4.2.1.46) | <i>rfbB3</i>     | <i>rrnAC2178</i> | 294 | 11.6 | 2 | 4 | 1      | R | FTTDDVQYAIARPLAESMR       | N | 3 | 2068.0411 | 2068.0437 | 0.0025  | 0       | 1.23   | 2.417 | 0.337   | 0   | 2  | 22 | 68  | 2 | 0 | 1 |
| Q5V0D3_HALMA | 1 | DTDP-glucose-46-dehydratase (EC 4.2.1.46) | <i>rfbB3</i>     | <i>rrnAC2178</i> | 294 | 11.6 | 2 | 4 | 1      | R | IVDDLTDRLPLMLVPK          | W | 3 | 1837.0383 | 1837.0446 | 0.0063  | 0       | 3.40   | 4.063 | 0.333   | 0   | 1  | 31 | 60  | 2 | 1 | 1 |
| Q5V0D3_HALMA | 1 | DTDP-glucose-46-dehydratase (EC 4.2.1.46) | <i>rfbB3</i>     | <i>rrnAC2178</i> | 294 | 11.6 | 2 | 4 | 1      | R | IVDDLTDRLPLMLVPK          | W | 3 | 1853.0383 | 1854.0454 | 1.0070  | -1.0034 | 2.00   | 3.419 | 0.336   | 0.1 | 2  | 28 | 60  | 2 | 1 | 1 |
| Q5V0I3_HALMA | 1 | Hypothetical protein                      | <i>rrnAC2121</i> | <i>rrnAC2121</i> | 760 | 7.6  | 3 | 4 | 1      | R | GATVTETATFDGTGTHEIDAK     | D | 2 | 2125.9804 | 2126.9054 | 0.9250  | -1.0034 | -36.84 | 4.593 | 0.51    | 0   | 1  | 19 | 38  | 2 | 0 | 1 |
| Q5V0I3_HALMA | 1 | Hypothetical protein                      | <i>rrnAC2121</i> | <i>rrnAC2121</i> | 760 | 7.6  | 3 | 4 | 0.9145 | R | AGSTAGDGTAAVGDPEPTLTNLA   | Q | 3 | 2398.1612 | 2399.4682 | 1.3069  | -1.0034 | 126.60 | 2.546 | 0.103   | 2.4 | 9  | 25 | 100 | 2 | 0 | 1 |
| Q5V0I3_HALMA | 1 | Hypothetical protein                      | <i>rrnAC2121</i> | <i>rrnAC2121</i> | 760 | 7.6  | 3 | 4 | 0.9866 | R | LDATDITTLVAAR             | F | 2 | 1245.6565 | 1245.5566 | -0.0999 | 0       | -80.21 | 1.475 | 0.284   | 0.1 | 6  | 17 | 22  | 2 | 0 | 1 |
| Q5V0I3_HALMA | 1 | Hypothetical protein                      | <i>rrnAC2121</i> | <i>rrnAC2121</i> | 760 | 7.6  | 3 | 4 | 0.9538 | R | LDATDITTLVAAR             | F | 2 | 1245.6565 | 1245.5564 | -0.1002 | 0       | -80.40 | 1.424 | 0.278   | 0.2 | 44 | 15 | 22  | 2 | 0 | 1 |
| Q5V0L6_HALMA | 1 | ABC transporter ATP-binding protein       | <i>nosF-3</i>    | <i>rrnAC2084</i> | 314 | 10.5 | 3 | 4 | 0.9711 | F | PIIEVLEHK                 | A | 2 | 1076.6230 | 1076.6854 | 0.0624  | 0       | 57.98  | 2.068 | 0.274   | 0.1 | 1  | 13 | 16  | 1 | 0 | 1 |
| Q5V0L6_HALMA | 1 | ABC transporter ATP-binding protein       | <i>nosF-3</i>    | <i>rrnAC2084</i> | 314 | 10.5 | 3 | 4 | 0.9997 | R | GTDTITVLELAK              | M | 2 | 1158.6496 | 1158.6498 | 0.0001  | 0       | 0.11   | 2.456 | 0.266   | 0.1 | 3  | 15 | 20  | 2 | 0 | 1 |
| Q5V0L6_HALMA | 1 | ABC transporter ATP-binding protein       | <i>nosF-3</i>    | <i>rrnAC2084</i> | 314 | 10.5 | 3 | 4 | 0.9850 | K | TFHINTLVGLVHK             | D | 3 | 1441.8293 | 1443.8182 | 1.9888  | -2.0067 | -12.38 | 2.409 | 0.122   | 0.9 | 1  | 24 | 48  | 2 | 0 | 1 |
| Q5V0L6_HALMA | 1 | ABC transporter ATP-binding protein       | <i>nosF-3</i>    | <i>rrnAC2084</i> | 314 | 10.5 | 3 | 4 | 0.9359 | K | TFHINTLVGLVHK             | D | 3 | 1441.8293 | 1441.8280 | -0.0013 | 0       | -0.92  | 1.985 | 0.115   | 2.8 | 47 | 17 | 48  | 2 | 0 | 1 |
| Q5V0Q0_HALMA | 1 | Hypothetical protein                      | <i>rrnAC2046</i> | <i>rrnAC2046</i> | 347 | 12.1 | 3 | 4 | 0.9898 | R | VVVLAEPTQTR               | L | 2 | 1211.6874 | 1211.6866 | -0.0008 | 0       | -0.66  | 1.958 | 0.168   | 0.2 | 4  | 14 | 20  | 2 | 0 | 1 |
| Q5V0Q0_HALMA | 1 | Hypothetical protein                      | <i>rrnAC2046</i> | <i>rrnAC2046</i> | 347 | 12.1 | 3 | 4 | 0.9999 | R | EALQEYTTDDGGR             | V | 2 | 1352.5844 | 1352.5849 | 0.0005  | 0       | 0.38   | 2.592 | 0.312   | 0.1 | 5  | 13 | 22  | 2 | 0 | 1 |
| Q5V0Q0_HALMA | 1 | Hypothetical protein                      | <i>rrnAC2046</i> | <i>rrnAC2046</i> | 347 | 12.1 | 3 | 4 | 1      | R | MGSEQLYNVDDAANDNNFK       | A | 2 | 2143.9116 | 2143.9166 | 0.0050  | 0       | 2.32   | 5.63  | 0.611   | 0   | 1  | 27 | 36  | 2 | 0 | 1 |
| Q5V0Q0_HALMA | 1 | Hypothetical protein                      | <i>rrnAC2046</i> | <i>rrnAC2046</i> | 347 | 12.1 | 3 | 4 | 1      | R | MGSEQLYNVDDAANDNNFK       | A | 2 | 2143.9116 | 2143.9115 | -0.0002 | 0       | -0.07  | 5.597 | 0.628   | 0   | 1  | 26 | 36  | 2 | 0 | 1 |
| Q5V148_HALMA | 1 | Dolichol-P-glucose synthetase             | <i>dpq</i>       | <i>rrnAC1873</i> | 605 | 6.1  | 4 | 4 | 0.9845 | R | TFVELSVSPR                | I | 3 | 1220.6189 | 1221.6382 | 1.0192  | -1.0034 | 13.02  | 2.71  | 0.127   | 0.8 | 21 | 16 | 36  | 2 | 0 | 1 |
| Q5V148_HALMA | 1 | Dolichol-P-glucose synthetase             | <i>dpq</i>       | <i>rrnAC1873</i> | 605 | 6.1  | 4 | 4 | 0.9994 | R | DFVFGMSQILR               | T | 2 | 1221.6176 | 1222.6254 | 1.0078  | -1.0034 | 3.66   | 2.822 | 0.24    | 0   | 1  | 16 | 20  | 2 | 0 | 1 |
| Q5V148_HALMA | 1 | Dolichol-P-glucose synthetase             | <i>dpq</i>       | <i>rrnAC1873</i> | 605 | 6.1  | 4 | 4 | 1      | K | VDIVRDVFGMSQILR           | T | 3 | 1803.9665 | 1803.9675 | 0.0010  | 0       | 0.54   | 4.569 | 0.344   | 0   | 1  | 32 | 60  | 2 | 1 | 1 |
| Q5V148_HALMA | 1 | Dolichol-P-glucose synthetase             | <i>dpq</i>       | <i>rrnAC1873</i> | 605 | 6.1  | 4 | 4 | 0.9664 | R | VDIEFPVDWTFK              | G | 3 | 1344.7078 | 1344.7071 | -0.0007 | 0       | -0.53  | 2.958 | 0.104   | 0.4 | 49 | 17 | 40  | 2 | 1 | 1 |
| Q5V1C0_HALMA | 1 | Histidine ammonia-lyase (EC 4.3.1.3)      | <i>hutH</i>      | <i>rrnAC1791</i> | 549 | 9.3  | 3 | 4 | 1      | R | ESVVDLLVAMLDSGVHPVPSR     | G | 3 | 2318.2304 | 2318.2177 | -0.0127 | 0       | -5.47  | 3.987 | 0.416   | 0   | 1  | 25 | 84  | 2 | 0 | 1 |
| Q5V1C0_HALMA | 1 | Histidine ammonia-lyase (EC 4.3.1.3)      | <i>hutH</i>      | <i>rrnAC1791</i> | 549 | 9.3  | 3 | 4 | 1      | R | ESVVDLLVAMLDSGVHPVPSR     | G | 3 | 2318.2304 | 2318.2348 | 0.0043  | 0       | 1.87   | 4.239 | 0.35    | 0   | 1  | 30 | 84  | 2 | 0 | 1 |
| Q5V1C0_HALMA | 1 | Histidine ammonia-lyase (EC 4.3.1.3)      | <i>hutH</i>      | <i>rrnAC1791</i> | 549 | 9.3  | 3 | 4 | 0.9999 | R | LDYLTNALTELAISER          | R | 3 | 1891.9891 | 1892.9897 | 1.0006  | -1.0034 | -1.46  | 3.621 | 0.247   | 0   | 1  | 29 | 64  | 2 | 0 | 1 |
| Q5V1G8_HALMA | 1 | Hypothetical protein                      | <i>rrnAC1731</i> | <i>rrnAC1731</i> | 256 | 9.8  | 2 | 4 | 1      | R | RLPDAEGLPQYVAPLPAWLENVGLR | L | 3 | 2773.4915 | 2773.4957 | 0.0042  | 0       | 1.52   | 5.127 | 0.418   | 0   | 1  | 44 | 96  | 2 | 0 | 1 |
| Q5V1G8_HALMA | 1 | Hypothetical protein                      | <i>rrnAC1731</i> | <i>rrnAC1731</i> | 256 | 9.8  | 2 | 4 | 0.9996 | R | RLPDAEGLPQYVAPLPAWLENVGLR | L | 3 | 2617.3904 | 2617.3908 | 0.0004  | 0       | 0.16   | 3.036 | 0.243   | 0.2 | 7  | 26 | 92  | 2 | 0 | 1 |
| Q5V1G8_HALMA | 1 | Hypothetical protein                      | <i>rrnAC1731</i> | <i>rrnAC1731</i> | 256 | 9.8  | 2 | 4 | 1      | R | RLPDAEGLPQYVAPLPAWLENVGLR | L | 3 | 2773.4915 | 2773.5047 | 0.0132  | 0       | 4.76   | 5.121 | 0.438   | 0   | 1  | 44 | 96  | 2 | 0 | 1 |
| Q5V1G8_HALMA | 1 | Hypothetical protein                      | <i>rrnAC1731</i> | <i>rrnAC1731</i> | 256 | 9.8  | 2 | 4 | 1      | R | RLPDAEGLPQYVAPLPAWLENVGLR | L | 3 | 2773.4915 | 2773.5007 | 0.0092  | 0       | 3.31   | 4.93  | 0.382   | 0   | 1  | 41 | 96  | 2 | 0 | 1 |
| Q5V2F5_HALMA | 1 | ABC transporter ATP-binding protein       | <i>trp-6</i>     | <i>rrnAC1368</i> | 232 | 15.9 | 2 | 4 | 1      | R | ATLHDPALLLLDEPPTGLDEESLLR | V | 3 | 2777.4487 | 2777.4589 | 0.0102  | 0       | 3.66   | 5.383 | 0.456   | 0   | 1  | 40 | 96  | 2 | 0 | 1 |
| Q5V2F5_HALMA | 1 | ABC transporter ATP-binding protein       | <i>trp-6</i>     | <i>rrnAC1368</i> | 232 | 15.9 | 2 | 4 | 1      | R | ATLHDPALLLLDEPPTGLDEESLLR | V | 3 | 2777.4487 | 2777.4560 | 0.0072  | 0       | 2.60   | 7.037 | 0.533   | 0   | 1  | 47 | 96  | 2 | 0 | 1 |
| Q5V2F5_HALMA | 1 | ABC transporter ATP-binding protein       | <i>trp-6</i>     | <i>rrnAC1368</i> | 232 | 15.9 | 2 | 4 | 1      | R | ATLHDPALLLLDEPPTGLDEESLLR | V | 3 | 2777.4487 | 2777.4514 | 0.0027  | 0       | 0.96   | 6.813 | 0.428   | 0   | 1  | 44 | 96  | 2 | 0 | 1 |
| Q5V2F5_HALMA | 1 | ABC transporter ATP-binding protein       | <i>trp-6</i>     | <i>rrnAC1368</i> | 232 | 15.9 | 2 | 4 | 1      | K | VGVEGITDVSRR              | G | 2 | 1243.6772 | 1243.6854 | 0.0082  | 0       | 6.61   | 3.152 | 0.444   | 0   | 1  | 18 | 22  | 2 | 0 | 1 |
| Q5V2L1_HALMA | 1 | Hypothetical protein                      | <i>rrnAC1305</i> | <i>rrnAC1305</i> | 132 | 17.4 | 1 | 4 | 0.9996 | K | SIEALTYYTELKGPAPRLVVSFLR  | Q | 3 | 2561.4217 | 2561.4082 | -0.0136 | 0       | -5.29  | 2.298 | 0.311   | 0.1 | 16 | 17 | 88  | 2 | 0 | 1 |
| Q5V2L1_HALMA | 1 | Hypothetical protein                      | <i>rrnAC1305</i> | <i>rrnAC1305</i> | 132 | 17.4 | 1 | 4 | 1      | K | SIEALTYYTELKGPAPRLVVSFLR  | Q | 4 | 2561.4217 | 2561.4235 | 0.0018  | 0       | 0.71   | 3.004 | 0.29    | 0.1 | 1  | 39 | 132 | 2 | 0 | 1 |
| Q5V2L1_HALMA | 1 | Hypothetical protein                      | <i>rrnAC1305</i> | <i>rrnAC1305</i> | 132 | 17.4 | 1 | 4 | 0.9999 | K | SIEALTYYTELKGPAPRLVVSFLR  | Q | 3 | 2561.4217 | 2561.4382 | 0.0164  | 0       | 6.42   | 3.078 | 0.271   | 0   | 3  | 21 | 88  | 2 | 0 | 1 |
| Q5V2L1_HALMA | 1 | Hypothetical protein                      | <i>rrnAC1305</i> | <i>rrnAC1305</i> | 132 | 17.4 | 1 | 4 | 0.9911 | K | SIEALTYYTELKGPAPRLVVSFLR  | Q | 4 | 2561.4217 | 2561.4235 | 0.0018  | 0       | 0.71   | 2.434 | 0.04    | 0.9 | 2  | 36 | 132 | 2 | 0 | 1 |
| Q5V2T7_HALMA | 1 | Hypothetical protein                      | <i>rrnAC1221</i> | <i>rrnAC1221</i> | 317 | 7.9  | 2 | 4 | 0.9974 | - | MDKPDNTNIGENGGEPEESER     | A | 2 | 2299.9863 | 2299.9854 | -0.0009 | 0       | -0.38  | 1.697 | 0.286   | 0.1 | 1  | 12 | 40  | 2 | 0 | 1 |
| Q5V2T7_HALMA | 1 | Hypothetical protein                      | <i>rrnAC1221</i> | <i>rrnAC1221</i> | 317 | 7.9  | 2 | 4 | 1      | - | MDKPDNTNIGENGGEPEESER     | A | 3 | 2299.9863 | 2300.9791 | 0.9928  | -1.0034 | -4.60  | 4.626 | 0.242   | 0.3 | 1  | 38 | 80  | 2 | 0 | 1 |
| Q5V2T7_HALMA | 1 | Hypothetical protein                      | <i>rrnAC1221</i> | <i>rrnAC1221</i> | 317 | 7.9  | 2 | 4 | 0.9985 | - | MDKPDNTNIGENGGEPEESERAQAR | E | 4 | 2726.2202 | 2726.2226 | 0.0024  | 0       | 0.87   | 3.32  | 0.133   | 0.7 | 2  | 37 | 144 | 2 | 1 | 1 |
| Q5V2T7_HALMA | 1 | Hypothetical protein                      | <i>rrnAC1221</i> | <i>rrnAC1221</i> | 317 | 7.9  | 2 | 4 | 0.9975 | - | MDKPDNTNIGENGGEPEESERAQAR | E | 3 | 2726.2202 | 2726.2284 | 0.0081  | 0       | 2.98   | 2.352 | 0.246   | 1   | 1  | 26 | 96  | 2 | 1 | 1 |
| Q5V392_HALMA | 1 | Hypothetical protein                      | <i>rrnAC1046</i> | <i>rrnAC1046</i> | 255 | 13.7 | 3 | 4 | 1      | R | TVLVTASPTETIR             | S | 2 | 1473.8038 | 1473.8054 | 0.0016  | 0       | 1.10   | 2.872 | 0.348   | 0   | 1  | 16 | 26  | 2 | 0 | 1 |
| Q5V392_HALMA | 1 | Hypothetical protein                      | <i>rrnAC1046</i> | <i>rrnAC1046</i> | 255 | 13.7 | 3 | 4 | 0.9787 | R | QILLFER                   | S | 2 | 917.5334  | 917.5346  | 0.0012  | 0       | 1.33   | 1.654 | 0.14    | 0.3 | 2  | 9  | 12  | 2 | 0 | 1 |
| Q5V392_HALMA | 1 | Hypothetical protein                      | <i>rrnAC1046</i> | <i>rrnAC1046</i> | 255 | 13.7 | 3 | 4 | 1      | R | TQDQTVESYIDGYR            | A | 2 | 1673.7533 | 1673.7542 | 0.0009  | 0       | 0.55   | 2.995 | 0.469   | 0   | 1  | 16 | 26  | 2 | 0 | 1 |
| Q5V392_HALMA | 1 | Hypothetical protein                      | <i>rrnAC1046</i> | <i>rrnAC1046</i> | 255 | 13.7 | 3 | 4 | 1      | R | TVLVTASPTETIR             | S | 2 | 1473.8038 | 1473.8054 | 0.0016  | 0       | 1.10   | 2.899 | 0.385   | 0   | 1  | 15 | 26  | 2 | 0 | 1 |
| Q5V403_HALMA | 1 | Universal stress protein                  | <i>usp17</i>     | <i>rrnAC0758</i> | 151 | 21.9 | 2 | 4 | 0.9945 | R | NVVEAIFHAADEVGASAIAYR     | S | 4 | 2202.1069 | 2203.1144 | 1.0075  | -1.0034 | 1.90   | 2.414 | 0.089   | 2.4 | 1  | 31 | 120 | 2 | 0 | 1 |
| Q5V403_HALMA | 1 | Universal stress protein                  | <i>usp17</i>     | <i>rrnAC0758</i> | 151 | 21.9 | 2 | 4 | 1      | R | LMQFLSGDLSLK              | L | 2 | 1350.7217 | 1350.7254 | 0.0037  | 0       | 2.76   | 3.364 | 0.327</ |     |    |    |     |   |   |   |

|                  |        |                                                               |                 |                 |     |      |   |   |        |   |                                    |   |   |           |           |         |         |        |       |       |     |     |    |     |   |   |   |
|------------------|--------|---------------------------------------------------------------|-----------------|-----------------|-----|------|---|---|--------|---|------------------------------------|---|---|-----------|-----------|---------|---------|--------|-------|-------|-----|-----|----|-----|---|---|---|
| Q5V555_HALMA     | 0.9999 | Hypothetical protein                                          | <i>rmaC0291</i> | <i>rmAC0291</i> | 364 | 4.1  | 1 | 4 | 1      | R | DVLVGYADLPVWMLR                    | L | 2 | 1745.9174 | 1745.9212 | 0.0038  | 0       | 2.19   | 4.221 | 0.574 | 0   | 1   | 23 | 28  | 2 | 0 | 1 |
| Q5V555_HALMA     | 0.9999 | Hypothetical protein                                          | <i>rmaC0291</i> | <i>rmAC0291</i> | 364 | 4.1  | 1 | 4 | 1      | R | DVLVGYADLPVWMLR                    | L | 2 | 1745.9174 | 1745.9209 | 0.0034  | 0       | 1.97   | 3.948 | 0.577 | 0   | 1   | 23 | 28  | 2 | 0 | 1 |
| Q5V555_HALMA     | 0.9999 | Hypothetical protein                                          | <i>rmaC0291</i> | <i>rmAC0291</i> | 364 | 4.1  | 1 | 4 | 1      | R | DVLVGYADLPVWMLR                    | L | 2 | 1745.9174 | 1745.9210 | 0.0036  | 0       | 2.04   | 4.153 | 0.562 | 0   | 1   | 22 | 28  | 2 | 0 | 1 |
| Q5V555_HALMA     | 0.9999 | Hypothetical protein                                          | <i>rmaC0291</i> | <i>rmAC0291</i> | 364 | 4.1  | 1 | 4 | 0.9983 | R | DVLVGYADLPVWMLR                    | L | 3 | 1761.9174 | 1761.9133 | -0.0041 | 0       | -2.35  | 2.796 | 0.135 | 0.6 | 1   | 29 | 56  | 2 | 0 | 1 |
| Q5V5E0_HALMA     | 0.9999 | Aldehyde dehydrogenase (EC 1.2.1.3)                           | <i>aldY2</i>    | <i>rmAC0201</i> | 508 | 2.2  | 1 | 4 | 1      | R | IDIDLVIDHFR                        | Y | 2 | 1354.7245 | 1355.6654 | 0.9409  | -1.0034 | -46.08 | 3.473 | 0.342 | 0   | 1   | 17 | 20  | 2 | 0 | 1 |
| Q5V5E0_HALMA     | 0.9999 | Aldehyde dehydrogenase (EC 1.2.1.3)                           | <i>aldY2</i>    | <i>rmAC0201</i> | 508 | 2.2  | 1 | 4 | 1      | R | IDIDLVIDHFR                        | Y | 2 | 1354.7245 | 1355.6454 | 0.9209  | -1.0034 | -60.84 | 3.485 | 0.328 | 0   | 1   | 16 | 20  | 2 | 0 | 1 |
| Q5V5E0_HALMA     | 0.9999 | Aldehyde dehydrogenase (EC 1.2.1.3)                           | <i>aldY2</i>    | <i>rmAC0201</i> | 508 | 2.2  | 1 | 4 | 0.9974 | R | IDIDLVIDHFR                        | Y | 3 | 1354.7245 | 1354.7159 | -0.0086 | 0       | -6.34  | 2.886 | 0.146 | 0.6 | 25  | 18 | 40  | 2 | 0 | 1 |
| Q5V5E0_HALMA     | 0.9999 | Aldehyde dehydrogenase (EC 1.2.1.3)                           | <i>aldY2</i>    | <i>rmAC0201</i> | 508 | 2.2  | 1 | 4 | 0.9935 | R | IDIDLVIDHFR                        | Y | 3 | 1354.7245 | 1354.7261 | 0.0016  | 0       | 1.16   | 2.348 | 0.134 | 0.7 | 5   | 21 | 40  | 2 | 0 | 1 |
| Q5V5T8_HALMA     | 0.9999 | Sugar ABC transporter ATP-binding protein (UGPC)              | <i>ugpC3</i>    | <i>rmAC0031</i> | 379 | 11.6 | 3 | 4 | 0.9089 | R | AIVRDPFVFLMDEPLANLDAK              | L | 3 | 2355.2144 | 2355.2224 | 0.0080  | 0       | 3.40   | 3.559 | 0.337 | 0   | 2   | 31 | 80  | 2 | 1 | 1 |
| Q5V5T8_HALMA     | 0.9999 | Sugar ABC transporter ATP-binding protein (UGPC)              | <i>ugpC3</i>    | <i>rmAC0031</i> | 379 | 11.6 | 3 | 4 | 0.9254 | R | AIVRDPFVFLMDEPLANLDAK              | L | 3 | 2355.2144 | 2355.2221 | 0.0076  | 0       | 3.25   | 3.725 | 0.282 | 0   | 2   | 30 | 80  | 2 | 1 | 1 |
| Q5V5T8_HALMA     | 0.9999 | Sugar ABC transporter ATP-binding protein (UGPC)              | <i>ugpC3</i>    | <i>rmAC0031</i> | 379 | 11.6 | 3 | 4 | 1      | K | DMGIFELIDR                         | K | 2 | 1207.5907 | 1207.5943 | 0.0036  | 0       | 2.99   | 2.729 | 0.334 | 0   | 1   | 16 | 18  | 2 | 0 | 1 |
| Q5V5T8_HALMA     | 0.9999 | Sugar ABC transporter ATP-binding protein (UGPC)              | <i>ugpC3</i>    | <i>rmAC0031</i> | 379 | 11.6 | 3 | 4 | 0.9503 | R | LDGQINDQPPAR                       | R | 2 | 1435.7419 | 1436.6074 | 0.8655  | -1.0034 | -96.03 | 2.562 | 0.087 | 0.3 | 4   | 15 | 24  | 2 | 0 | 1 |
| Q5V4X8_HALMA     | 0.9998 | 4-aminobutyrate aminotransferase                              | <i>gabT</i>     | <i>rmAC0382</i> | 440 | 13.2 | 3 | 4 | 0.9997 | K | YGITFDGAFHGR                       | T | 3 | 1339.6309 | 1339.6299 | -0.0011 | 0       | -0.78  | 2.313 | 0.235 | 0   | 1   | 20 | 44  | 2 | 0 | 1 |
| Q5V4X8_HALMA     | 0.9998 | 4-aminobutyrate aminotransferase                              | <i>gabT</i>     | <i>rmAC0382</i> | 440 | 13.2 | 3 | 4 | 0.9546 | R | GLGLMTALEFDTADRR                   | D | 3 | 1764.8828 | 1764.8845 | 0.0017  | 0       | 0.97   | 2.221 | 0.126 | 1.3 | 76  | 17 | 60  | 2 | 0 | 1 |
| Q5V4X8_HALMA     | 0.9998 | 4-aminobutyrate aminotransferase                              | <i>gabT</i>     | <i>rmAC0382</i> | 440 | 13.2 | 3 | 4 | 1      | K | YGITFDGAFHGR                       | T | 3 | 1339.6309 | 1339.6317 | 0.0008  | 0       | 0.58   | 2.722 | 0.333 | 0   | 1   | 21 | 44  | 2 | 0 | 1 |
| Q5UYR4_HALMA     | 0.9997 | Sugar and other transporter                                   | <i>did</i>      | <i>rmAC2836</i> | 452 | 17   | 3 | 4 | 0.9999 | R | GVVPLAIVSGVIGVR                    | M | 3 | 1434.8922 | 1435.8982 | 1.0059  | -1.0034 | 1.81   | 2.687 | 0.316 | 0   | 1   | 23 | 56  | 2 | 0 | 1 |
| Q5UYR4_HALMA     | 0.9997 | Sugar and other transporter                                   | <i>did</i>      | <i>rmAC2836</i> | 452 | 17   | 3 | 4 | 0.9806 | R | YGTPSVLTAVALVSTVPLVLIPSVR          | G | 3 | 2551.4989 | 2552.4982 | 0.9992  | -1.0034 | -1.61  | 2.656 | 0.218 | 0.5 | 160 | 19 | 96  | 2 | 0 | 1 |
| Q5UYR4_HALMA     | 0.9997 | Sugar and other transporter                                   | <i>did</i>      | <i>rmAC2836</i> | 452 | 17   | 3 | 4 | 0.9604 | R | YGTPSVLTAVALVSTVPLVLIPSVR          | G | 3 | 2551.4989 | 2551.5053 | 0.0063  | 0       | 2.49   | 2.495 | 0.14  | 1   | 145 | 20 | 96  | 2 | 0 | 1 |
| Q5UWZ7_HALMA     | 0.9990 | Hypothetical protein                                          | <i>rmaC3540</i> | <i>rmAC3540</i> | 521 | 4.4  | 2 | 4 | 1      | R | LDLLGTNNWWDITPLK                   | A | 2 | 1898.9778 | 1898.9854 | 0.0076  | 0       | 4.01   | 3.916 | 0.436 | 0   | 1   | 19 | 30  | 2 | 0 | 1 |
| Q5UWZ7_HALMA     | 0.9990 | Hypothetical protein                                          | <i>rmaC3540</i> | <i>rmAC3540</i> | 521 | 4.4  | 2 | 4 | 1      | R | LDLLGTNNWWDITPLK                   | A | 2 | 1898.9778 | 1900.9854 | 2.0076  | -2.0067 | 0.49   | 5.002 | 0.39  | 0   | 1   | 22 | 30  | 2 | 0 | 1 |
| Q5UWZ7_HALMA     | 0.9990 | Hypothetical protein                                          | <i>rmaC3540</i> | <i>rmAC3540</i> | 521 | 4.4  | 2 | 4 | 1      | R | LDLLGTNNWWDITPLK                   | A | 2 | 1898.9778 | 1898.9854 | 0.0076  | 0       | 4.01   | 4.351 | 0.46  | 0   | 1   | 21 | 30  | 2 | 0 | 1 |
| Q5UWZ7_HALMA     | 0.9990 | Hypothetical protein                                          | <i>rmaC3540</i> | <i>rmAC3540</i> | 521 | 4.4  | 2 | 4 | 0.9561 | R | LPWVVFVR                           | V | 2 | 915.5330  | 916.5349  | 1.0019  | -1.0034 | -1.56  | 2.223 | 0.039 | 0.1 | 1   | 11 | 12  | 2 | 0 | 1 |
| Q5UX97_HALMA     | 0.9989 | Terminal quinol oxidase subunit                               | <i>dox2</i>     | <i>rmAC3427</i> | 128 | 25   | 2 | 4 | 0.9999 | R | VSTGAVATFLAVVTPMTMHDWFNADPDDQSGSER | L | 4 | 3433.5885 | 3435.6064 | 2.0179  | -2.0067 | 3.25   | 3.83  | 0.254 | 0.1 | 1   | 38 | 186 | 2 | 0 | 1 |
| Q5UX97_HALMA     | 0.9989 | Terminal quinol oxidase subunit                               | <i>dox2</i>     | <i>rmAC3427</i> | 128 | 25   | 2 | 4 | 0.9561 | R | SWLALGR                            | L | 2 | 801.4497  | 801.4454  | -0.0043 | 0       | -5.34  | 2.127 | 0.055 | 0.4 | 5   | 11 | 12  | 2 | 0 | 1 |
| Q5UX97_HALMA     | 0.9989 | Terminal quinol oxidase subunit                               | <i>dox2</i>     | <i>rmAC3427</i> | 128 | 25   | 2 | 4 | 0.9999 | R | VSTGAVATFLAVVTPMTMHDWFNADPDDQSGSER | L | 4 | 3433.5885 | 3433.5905 | 0.0020  | 0       | 0.58   | 4.563 | 0.22  | 0.1 | 3   | 43 | 186 | 2 | 0 | 1 |
| Q5UYQ2_HALMA     | 0.9973 | Hydrolase alpha/beta hydrolase fold family                    | <i>pcbD-1</i>   | <i>rmAC2850</i> | 298 | 10.1 | 2 | 4 | 0.9653 | R | HAPWALGR                           | L | 2 | 906.4824  | 906.4837  | 0.0013  | 0       | 1.45   | 1.51  | 0.164 | 0.1 | 2   | 12 | 14  | 2 | 0 | 1 |
| Q5UYQ2_HALMA     | 0.9973 | Hydrolase alpha/beta hydrolase fold family                    | <i>pcbD-1</i>   | <i>rmAC2850</i> | 298 | 10.1 | 2 | 4 | 0.9977 | R | VDSDLHGLTLTAAGDDALAAAO             | R | 3 | 2167.0505 | 2169.1078 | 2.0573  | -2.0067 | 23.34  | 4.109 | 0.106 | 0   | 1   | 31 | 84  | 2 | 0 | 1 |
| Q5UX88_HALMA     | 0.9962 | Potassium channel-like                                        | <i>pch2</i>     | <i>rmAC3436</i> | 404 | 10.1 | 2 | 4 | 1      | R | AGADTVISPAVLGGHLIVQSALGR           | E | 3 | 2301.2805 | 2301.2788 | -0.0017 | 0       | -0.74  | 3.073 | 0.402 | 0   | 1   | 34 | 92  | 2 | 0 | 1 |
| Q5UX88_HALMA     | 0.9962 | Potassium channel-like                                        | <i>pch2</i>     | <i>rmAC3436</i> | 404 | 10.1 | 2 | 4 | 1      | R | AGADTVISPAVLGGHLIVQSALGR           | E | 3 | 2301.2805 | 2301.2849 | 0.0043  | 0       | 1.89   | 2.997 | 0.347 | 0   | 1   | 33 | 92  | 2 | 0 | 1 |
| Q5UX88_HALMA     | 0.9962 | Potassium channel-like                                        | <i>pch2</i>     | <i>rmAC3436</i> | 404 | 10.1 | 2 | 4 | 1      | R | AGADTVISPAVLGGHLIVQSALGR           | E | 3 | 2301.2805 | 2301.2819 | 0.0014  | 0       | 0.62   | 2.992 | 0.326 | 0   | 1   | 34 | 92  | 2 | 0 | 1 |
| Q5V3A6_HALMA     | 0.9948 | Hypothetical protein                                          | <i>rmaC1031</i> | <i>rmAC1031</i> | 674 | 5.5  | 2 | 4 | 1      | R | GQLQTVAGDPVPTGRPV                  | L | 3 | 1749.9486 | 1749.9475 | -0.0011 | 0       | -0.62  | 2.529 | 0.352 | 0.1 | 1   | 25 | 64  | 2 | 0 | 1 |
| Q5V3A6_HALMA     | 0.9948 | Hypothetical protein                                          | <i>rmaC1031</i> | <i>rmAC1031</i> | 674 | 5.5  | 2 | 4 | 1      | R | GQLQTVAGDPVPTGRPV                  | L | 3 | 1749.9486 | 1749.9468 | -0.0018 | 0       | -1.04  | 3.046 | 0.28  | 0   | 1   | 25 | 64  | 2 | 0 | 1 |
| Q5V3A6_HALMA     | 0.9948 | Hypothetical protein                                          | <i>rmaC1031</i> | <i>rmAC1031</i> | 674 | 5.5  | 2 | 4 | 1      | R | GQLQTVAGDPVPTGRPV                  | L | 3 | 1749.9486 | 1749.9495 | 0.0009  | 0       | 0.53   | 3.189 | 0.385 | 0.1 | 1   | 27 | 64  | 2 | 0 | 1 |
| Q5V3A6_HALMA     | 0.9948 | Hypothetical protein                                          | <i>rmaC1031</i> | <i>rmAC1031</i> | 674 | 5.5  | 2 | 4 | 0.9965 | R | GQLQTVAGDPVPTGRPV                  | L | 3 | 1749.9486 | 1749.9495 | 0.0009  | 0       | 0.53   | 2.558 | 0.136 | 0.5 | 1   | 24 | 64  | 2 | 0 | 1 |
| Q5UX48_HALMA     | 0.9791 | Hypothetical protein                                          | <i>rmaC3481</i> | <i>rmAC3481</i> | 106 | 20.8 | 1 | 4 | 0.9999 | A | ADDESGYVHRPDTEPQATDTSR             | A | 3 | 2446.0633 | 2446.0658 | 0.0025  | 0       | 1.02   | 4.116 | 0.351 | 0   | 1   | 29 | 84  | 2 | 0 | 1 |
| Q5UX48_HALMA     | 0.9791 | Hypothetical protein                                          | <i>rmaC3481</i> | <i>rmAC3481</i> | 106 | 20.8 | 1 | 4 | 1      | M | ADDESGYVHRPDTEPQATDTSR             | A | 3 | 2446.0633 | 2446.0715 | 0.0082  | 0       | 3.34   | 4.698 | 0.463 | 0   | 1   | 34 | 84  | 2 | 0 | 1 |
| Q5UX48_HALMA     | 0.9791 | Hypothetical protein                                          | <i>rmaC3481</i> | <i>rmAC3481</i> | 106 | 20.8 | 1 | 4 | 1      | M | ADDESGYVHRPDTEPQATDTSR             | A | 3 | 2446.0633 | 2446.0715 | 0.0082  | 0       | 3.34   | 4.416 | 0.404 | 0   | 1   | 32 | 84  | 2 | 0 | 1 |
| Q5UX48_HALMA     | 0.9791 | Hypothetical protein                                          | <i>rmaC3481</i> | <i>rmAC3481</i> | 106 | 20.8 | 1 | 4 | 1      | M | ADDESGYVHRPDTEPQATDTSR             | A | 3 | 2446.0633 | 2446.0667 | 0.0034  | 0       | 1.39   | 4.35  | 0.409 | 0   | 1   | 36 | 84  | 2 | 0 | 1 |
| RS15_HALMAReview | 0.9791 | 30S ribosomal protein S15P\$13e (HmaS15) (HS11)               | <i>rp15p</i>    | <i>rmAC1426</i> | 156 | 10.3 | 1 | 4 | 1      | R | LRDHMDENPGDYQNK                    | A | 4 | 1986.8966 | 1986.8966 | -0.0001 | 0       | -0.04  | 4.399 | 0.241 | 0   | 1   | 41 | 90  | 2 | 1 | 1 |
| RS15_HALMAReview | 0.9791 | 30S ribosomal protein S15P\$13e (HmaS15) (HS11)               | <i>rp15p</i>    | <i>rmAC1426</i> | 156 | 10.3 | 1 | 4 | 0.9999 | R | LRDHMDENPGDYQNK                    | A | 4 | 1986.8966 | 1986.8955 | -0.0012 | 0       | -0.59  | 4.139 | 0.234 | 0   | 1   | 36 | 90  | 2 | 1 | 1 |
| RS15_HALMAReview | 0.9791 | 30S ribosomal protein S15P\$13e (HmaS15) (HS11)               | <i>rp15p</i>    | <i>rmAC1426</i> | 156 | 10.3 | 1 | 4 | 0.9998 | R | LRDHMDENPGDYQNK                    | A | 4 | 1986.8966 | 1986.8958 | -0.0008 | 0       | -0.40  | 3.525 | 0.175 | 0   | 1   | 37 | 90  | 2 | 1 | 1 |
| RS15_HALMAReview | 0.9791 | 30S ribosomal protein S15P\$13e (HmaS15) (HS11)               | <i>rp15p</i>    | <i>rmAC1426</i> | 156 | 10.3 | 1 | 4 | 0.9428 | R | LRDHMDENPGDYQNK                    | A | 4 | 1986.8966 | 1986.8920 | -0.0046 | 0       | -2.31  | 2.041 | 0.004 | 1.4 | 3   | 26 | 90  | 2 | 1 | 1 |
| Q5UY66_HALMA     | 0.9429 | Hypothetical protein                                          | <i>rmaC3070</i> | <i>rmAC3070</i> | 219 | 10   | 2 | 4 | 0.9296 | R | AIDAMNHVPLGR                       | V | 3 | 1407.6929 | 1407.6982 | 0.0052  | 0       | 3.73   | 1.535 | 0.105 | 5.8 | 1   | 21 | 48  | 2 | 0 | 1 |
| Q5UY66_HALMA     | 0.9429 | Hypothetical protein                                          | <i>rmaC3070</i> | <i>rmAC3070</i> | 219 | 10   | 2 | 4 | 0.9546 | R | TAFGDIVER                          | A | 2 | 1006.5083 | 1006.5054 | -0.0029 | 0       | -2.86  | 1.74  | 0.074 | 1.5 | 1   | 13 | 16  | 2 | 0 | 1 |
| Q5V4M3_HALMA     | 0.9211 | Halocyanin-like protein                                       | <i>hcp2</i>     | <i>rmAC0508</i> | 190 | 5.8  | 1 | 4 | 0.9847 | K | ALGMGVGAVVVE                       | - | 1 | 1043.5685 | 1043.5723 | 0.0038  | 0       | 3.63   | 1.535 | 0.17  | 1.8 | 3   | 11 | 20  | 2 | 0 | 1 |
| EF2_HALMAReview  | 1      | Elongation factor 2 (EF-2)                                    | <i>fusA</i>     | <i>rmAC2413</i> | 728 | 6.3  | 3 | 3 | 0.9993 | M | FYISIEPLGEDIVETIK                  | M | 3 | 1965.0346 | 1966.0282 | 0.9935  | -1.0034 | -4.99  | 3.353 | 0.181 | 0   | 1   | 26 | 64  | 2 | 0 | 1 |
| EF2_HALMAReview  | 1      | Elongation factor 2 (EF-2)                                    | <i>fusA</i>     | <i>rmAC2413</i> | 728 | 6.3  | 3 | 3 | 1      | R | FYISIEPLGEDIVETIK                  | M | 3 | 1965.0346 | 1966.0582 | 1.0235  | -1.0034 | 10.28  | 4.424 | 0.301 | 0   | 1   | 30 | 64  | 2 | 0 | 1 |
| EF2_HALMAReview  | 1      | Elongation factor 2 (EF-2)                                    | <i>fusA</i>     | <i>rmAC2413</i> | 728 | 6.3  | 3 | 3 | 1      | G | LLAVIQDVNDLIR                      | M | 2 | 1480.8613 | 1480.8644 | 0.0030  | 0       | 2.05   | 3.851 | 0.423 | 0   | 1   | 21 | 24  | 2 | 0 | 1 |
| Q5UWV1_HALMA     | 1      | Probable exodeoxyribonuclease VII large subunit (EC 3.1.11.6) | <i>xseA2</i>    | <i>rmB0041</i>  | 403 | 19.6 | 3 |   |        |   |                                    |   |   |           |           |         |         |        |       |       |     |     |    |     |   |   |   |

|                  |        |                                                                                         |                 |          |     |      |   |   |        |   |                                |   |   |           |           |         |         |         |       |       |     |     |    |     |   |   |   |
|------------------|--------|-----------------------------------------------------------------------------------------|-----------------|----------|-----|------|---|---|--------|---|--------------------------------|---|---|-----------|-----------|---------|---------|---------|-------|-------|-----|-----|----|-----|---|---|---|
| Q5V4S1_HALMA     | 1      | NADH dehydrogenase                                                                      | <i>yjlD1</i>    | rmAC0450 | 389 | 26.7 | 8 | 3 | 1      | K | SLDDALEIHDKVQQAAR              | E | 3 | 1907.9701 | 1907.9725 | 0.0024  | 0       | 1.24    | 3.968 | 0.437 | 0   | 1   | 33 | 64  | 2 | 1 | 1 |
| Q5V4S1_HALMA     | 1      | NADH dehydrogenase                                                                      | <i>yjlD1</i>    | rmAC0450 | 389 | 26.7 | 8 | 3 | 1      | K | SLDDALEIHDKVQQAAR              | E | 3 | 1907.9701 | 1907.9741 | 0.0040  | 0       | 2.11    | 4.1   | 0.413 | 0   | 1   | 32 | 64  | 2 | 1 | 1 |
| Q5V4V8_HALMA     | 1      | LemA protein                                                                            | <i>lemA</i>     | rmAC0409 | 193 | 15.5 | 3 | 3 | 0.9999 | R | FDDVDRDALETIQRLNRR             | E | 4 | 2374.1989 | 2375.2062 | 1.0073  | -1.0034 | 1.67    | 3.159 | 0.258 | 0   | 1   | 33 | 108 | 2 | 2 | 1 |
| Q5V4V8_HALMA     | 1      | LemA protein                                                                            | <i>lemA</i>     | rmAC0409 | 193 | 15.5 | 3 | 3 | 0.9990 | R | YNALLQKPIER                    | Y | 2 | 1343.7197 | 1343.7254 | 0.0057  | 0       | 4.26    | 1.954 | 0.291 | 0.4 | 3   | 15 | 20  | 2 | 0 | 1 |
| Q5V522_HALMA     | 1      | Acetolactate synthase (EC 2.2.1.6)                                                      | <i>ilvB2</i>    | rmAC0330 | 585 | 8.4  | 2 | 3 | 1      | R | ASVPKEEEETEPETEPEQPVTTGAQSVIR  | A | 3 | 3069.4626 | 3069.4755 | 0.0129  | 0       | 4.19    | 4.21  | 0.406 | 0   | 1   | 31 | 108 | 2 | 1 | 1 |
| Q5V522_HALMA     | 1      | Acetolactate synthase (EC 2.2.1.6)                                                      | <i>ilvB2</i>    | rmAC0330 | 585 | 8.4  | 2 | 3 | 1      | R | ASVPKEEEETEPETEPEQPVTTGAQSVIR  | A | 3 | 3069.4626 | 3069.4882 | 0.0255  | 0       | 8.32    | 4.586 | 0.481 | 0   | 1   | 33 | 108 | 2 | 1 | 1 |
| Q5V522_HALMA     | 1      | Acetolactate synthase (EC 2.2.1.6)                                                      | <i>ilvB2</i>    | rmAC0330 | 585 | 8.4  | 2 | 3 | 0.9992 | R | MASEYPWIQFDFKLAEAFGAR          | G | 3 | 2426.1729 | 2426.1709 | -0.0021 | 0       | -0.85   | 2.66  | 0.252 | 0   | 1   | 30 | 80  | 2 | 1 | 1 |
| Q5V5S8_HALMA     | 1      | Hypothetical protein                                                                    | <i>rmAC0042</i> | rmAC0042 | 253 | 15.4 | 3 | 3 | 0.9978 | K | TVAGQPVEEGGEERFHATDKEVAR       | K | 3 | 2675.2575 | 2675.2569 | -0.0006 | 0       | -0.23   | 2.431 | 0.256 | 0.2 | 2   | 27 | 92  | 2 | 2 | 1 |
| Q5V5S8_HALMA     | 1      | Hypothetical protein                                                                    | <i>rmAC0042</i> | rmAC0042 | 253 | 15.4 | 3 | 3 | 0.9996 | R | KIVDDWMAWPDYRER                | L | 4 | 1978.9359 | 1979.9309 | 0.9950  | -1.0034 | -4.23   | 2.995 | 0.238 | 0.1 | 2   | 26 | 84  | 2 | 1 | 1 |
| Q5V5S8_HALMA     | 1      | Hypothetical protein                                                                    | <i>rmAC0042</i> | rmAC0042 | 253 | 15.4 | 3 | 3 | 0.9591 | K | TVAGQPYEEGGEERFHATDKEVARK      | I | 5 | 2803.3525 | 2804.3636 | 1.0111  | -1.0034 | 2.76    | 2.383 | 0.002 | 4.1 | 1   | 52 | 192 | 2 | 2 | 1 |
| Q5V679_HALMA     | 1      | Ferrichrome ABC transporter permease protein                                            | <i>fluG1</i>    | pNG7275  | 371 | 4.9  | 1 | 3 | 1      | R | IAVIPTLAATLLALAGAR             | Q | 2 | 1734.0767 | 1734.0854 | 0.0087  | 0       | 5.03    | 4.221 | 0.558 | 0   | 1   | 26 | 34  | 2 | 0 | 1 |
| Q5V679_HALMA     | 1      | Ferrichrome ABC transporter permease protein                                            | <i>fluG1</i>    | pNG7275  | 371 | 4.9  | 1 | 3 | 1      | R | IAVIPTLAATLLALAGAR             | Q | 2 | 1734.0767 | 1734.0854 | 0.0087  | 0       | 5.03    | 4.143 | 0.51  | 0   | 1   | 24 | 34  | 2 | 0 | 1 |
| Q5V679_HALMA     | 1      | Ferrichrome ABC transporter permease protein                                            | <i>fluG1</i>    | pNG7275  | 371 | 4.9  | 1 | 3 | 1      | R | IAVIPTLAATLLALAGAR             | Q | 3 | 1734.0767 | 1735.0748 | 0.9981  | -1.0034 | -3.05   | 3.534 | 0.34  | 0   | 1   | 32 | 68  | 2 | 0 | 1 |
| Q5V6Q3_HALMA     | 1      | MCP domain signal transducer                                                            | <i>htr8</i>     | pNG7084  | 637 | 8.6  | 3 | 3 | 0.9999 | R | TRIENIQAQTGTVVSVQVER           | A | 3 | 2128.1236 | 2128.1277 | 0.0041  | 0       | 1.92    | 3.033 | 0.338 | 0.1 | 3   | 22 | 72  | 2 | 1 | 1 |
| Q5V6Q3_HALMA     | 1      | MCP domain signal transducer                                                            | <i>htr8</i>     | pNG7084  | 637 | 8.6  | 3 | 3 | 0.9998 | R | ASELVEKEIEAVER                 | S | 3 | 1600.8308 | 1600.8292 | -0.0016 | 0       | -1.02   | 3.869 | 0.184 | 0.2 | 1   | 28 | 52  | 2 | 1 | 1 |
| Q5V6Q3_HALMA     | 1      | MCP domain signal transducer                                                            | <i>htr8</i>     | pNG7084  | 637 | 8.6  | 3 | 3 | 1      | R | LRDEAEQEREVAALNSHLELK          | A | 4 | 2578.2987 | 2578.3061 | 0.0074  | 0       | 2.86    | 3.292 | 0.36  | 0   | 1   | 39 | 126 | 2 | 2 | 1 |
| Q5V731_HALMA     | 1      | DSBA-like thioredoxin                                                                   | <i>trx</i>      | pNG6070  | 328 | 10.4 | 3 | 3 | 1      | R | HWLVAHPDDLSGVDYK               | R | 3 | 1850.8951 | 1851.9082 | 1.0130  | -1.0034 | 5.24    | 3.87  | 0.426 | 0   | 1   | 32 | 60  | 2 | 0 | 1 |
| Q5V731_HALMA     | 1      | DSBA-like thioredoxin                                                                   | <i>trx</i>      | pNG6070  | 328 | 10.4 | 3 | 3 | 1      | R | HWLVAHPDDLSGVDYKR              | A | 4 | 2006.9962 | 2006.9979 | 0.0016  | 0       | 0.82    | 5.101 | 0.398 | 0   | 1   | 47 | 96  | 2 | 0 | 1 |
| Q5V731_HALMA     | 1      | DSBA-like thioredoxin                                                                   | <i>trx</i>      | pNG6070  | 328 | 10.4 | 3 | 3 | 0.9998 | T | LVEFAQAAGVSETASVR              | T | 2 | 1733.8948 | 1733.9004 | 0.0055  | 0       | 3.20    | 2.773 | 0.246 | 0.4 | 1   | 15 | 32  | 2 | 0 | 1 |
| RL18_HALMAReview | 1      | 50S ribosomal protein L18P (Hma118) (H112)                                              | <i>rpl18p</i>   | rmAC1593 | 187 | 14.4 | 1 | 3 | 1      | K | VFAIQEGAGIDAGLDIPHNDVLDVADWQR  | T | 3 | 2977.4570 | 2977.4696 | 0.0125  | 0       | 4.21    | 5.798 | 0.468 | 0   | 1   | 47 | 104 | 2 | 0 | 1 |
| RL18_HALMAReview | 1      | 50S ribosomal protein L18P (Hma118) (H112)                                              | <i>rpl18p</i>   | rmAC1593 | 187 | 14.4 | 1 | 3 | 1      | K | VFAIQEGAGIDAGLDIPHNDVLDVADWQR  | T | 4 | 2977.4570 | 2978.4509 | 0.9939  | -1.0034 | -3.18   | 4.734 | 0.411 | 0   | 1   | 50 | 156 | 2 | 0 | 1 |
| RL18_HALMAReview | 1      | 50S ribosomal protein L18P (Hma118) (H112)                                              | <i>rpl18p</i>   | rmAC1593 | 187 | 14.4 | 1 | 3 | 1      | T | VFAIQEGAGIDAGLDIPHNDVLDVADWQR  | T | 3 | 2977.4570 | 2977.4721 | 0.0151  | 0       | 5.07    | 5.638 | 0.504 | 0   | 1   | 41 | 104 | 2 | 0 | 1 |
| RS8E_HALMAReview | 1      | 30S ribosomal protein S8e (HS23)                                                        | <i>rps8e</i>    | rmAC1511 | 123 | 25.2 | 1 | 3 | 1      | K | TDVASIADGAETIEATIENVVENSPPNYAR | R | 3 | 3259.5480 | 3260.5582 | 1.0101  | -1.0034 | 2.09    | 4.947 | 0.487 | 0   | 1   | 33 | 120 | 2 | 0 | 1 |
| RS8E_HALMAReview | 1      | 30S ribosomal protein S8e (HS23)                                                        | <i>rps8e</i>    | rmAC1511 | 123 | 25.2 | 1 | 3 | 1      | K | TDVASIADGAETIEATIENVVENSPPNYAR | R | 4 | 3259.5480 | 3261.5709 | 2.0229  | -2.0067 | 4.96    | 4.403 | 0.292 | 0.2 | 2   | 39 | 180 | 2 | 0 | 1 |
| RS8E_HALMAReview | 1      | 30S ribosomal protein S8e (HS23)                                                        | <i>rps8e</i>    | rmAC1511 | 123 | 25.2 | 1 | 3 | 0.9696 | K | TDVASIADGAETIEATIENVVENSPPNYAR | R | 3 | 3259.5480 | 3260.5582 | 1.0101  | -1.0034 | 2.09    | 3.371 | 0.149 | 0.3 | 194 | 20 | 120 | 2 | 0 | 1 |
| UPP_HALMAReview  | 1      | Probable uracil phosphoribosyltransferase (EC 2.4.2.9) (UMPpyrophosphorylase) (UPRTase) | <i>upp</i>      | rmAC2577 | 225 | 6.2  | 2 | 3 | 0.9899 | K | GLEDVVIVNVLR                   | A | 3 | 1324.7714 | 1326.7882 | 2.0167  | -2.0067 | 7.58    | 2.39  | 0.183 | 0.5 | 13  | 20 | 44  | 2 | 0 | 1 |
| UPP_HALMAReview  | 1      | Probable uracil phosphoribosyltransferase (EC 2.4.2.9) (UMPpyrophosphorylase) (UPRTase) | <i>upp</i>      | rmAC2577 | 225 | 6.2  | 2 | 3 | 1      | K | GLEDVVIVNVLR                   | A | 3 | 1324.7714 | 1324.7782 | 0.0067  | 0       | 5.09    | 3.428 | 0.34  | 0   | 1   | 21 | 44  | 2 | 0 | 1 |
| UPP_HALMAReview  | 1      | Probable uracil phosphoribosyltransferase (EC 2.4.2.9) (UMPpyrophosphorylase) (UPRTase) | <i>upp</i>      | rmAC2577 | 225 | 6.2  | 2 | 3 | 0.9999 | R | VKGLEDVVIVNVLR                 | A | 3 | 1551.9348 | 1551.9338 | -0.0010 | 0       | -0.66   | 4.182 | 0.182 | 0.1 | 1   | 27 | 52  | 2 | 1 | 1 |
| Q5UY78_HALMA     | 0.9999 | Hypothetical protein                                                                    | <i>rmAC3056</i> | rmAC3056 | 880 | 5.6  | 3 | 3 | 0.9995 | R | SPAALLDALRAWISER               | F | 3 | 1767.9631 | 1768.9672 | 1.0041  | -1.0034 | 0.44    | 3.597 | 0.226 | 0   | 1   | 28 | 60  | 2 | 1 | 1 |
| Q5UY78_HALMA     | 0.9999 | Hypothetical protein                                                                    | <i>rmAC3056</i> | rmAC3056 | 880 | 5.6  | 3 | 3 | 0.9974 | R | HIETAAQQSSATDDTDDATEGRP        | - | 3 | 2472.0637 | 2473.0746 | 1.0109  | -1.0034 | 3.05    | 2.518 | 0.217 | 0.1 | 1   | 25 | 92  | 2 | 0 | 1 |
| Q5UWQ4_HALMA     | 0.9998 | Hypothetical protein                                                                    | <i>rmB0096</i>  | rmB0096  | 646 | 10.5 | 3 | 3 | 0.9927 | K | EMVVVRPKDDIEGEVIR              | A | 3 | 1951.0738 | 1951.0823 | 0.0085  | 0       | 4.34    | 2.237 | 0.198 | 0.9 | 1   | 22 | 64  | 2 | 1 | 1 |
| Q5UWQ4_HALMA     | 0.9998 | Hypothetical protein                                                                    | <i>rmB0096</i>  | rmB0096  | 646 | 10.5 | 3 | 3 | 1      | K | MLDKKEEIWQHLEGKEWYPMVK         | A | 4 | 2688.3080 | 2688.3054 | -0.0027 | 0       | -0.99   | 5.515 | 0.351 | 0   | 1   | 42 | 120 | 2 | 2 | 1 |
| Q5V4K1_HALMA     | 0.9998 | CDP-diacylglycerol-glycerol-3-phosphate 3-phosphatidyltransferase(EC 2.7.8.5)           | <i>pgsA</i>     | rmAC0532 | 202 | 17.8 | 3 | 3 | 0.9765 | R | ALGPFVSAAK                     | V | 2 | 959.5440  | 960.5454  | 1.0014  | -1.0034 | -2.01   | 2.389 | 0.184 | 0.5 | 31  | 12 | 18  | 2 | 0 | 1 |
| Q5V4K1_HALMA     | 0.9998 | CDP-diacylglycerol-glycerol-3-phosphate 3-phosphatidyltransferase(EC 2.7.8.5)           | <i>pgsA</i>     | rmAC0532 | 202 | 17.8 | 3 | 3 | 1      | R | ELNVASSGGDLLDHVLDLR            | Y | 2 | 1908.9541 | 1908.9654 | 0.0113  | 0       | 5.93    | 2.964 | 0.341 | 0   | 1   | 16 | 34  | 2 | 0 | 1 |
| Q5V1H2_HALMA     | 0.9996 | Hypothetical protein                                                                    | <i>rmAC1727</i> | rmAC1727 | 143 | 9.8  | 2 | 3 | 0.9985 | R | GLLAGIGALGLG                   | F | 2 | 1010.6124 | 1010.6156 | 0.0032  | 0       | 3.18    | 2.885 | 0.334 | 0   | 1   | 15 | 22  | 1 | 0 | 1 |
| Q5V1H2_HALMA     | 0.9996 | Hypothetical protein                                                                    | <i>rmAC1727</i> | rmAC1727 | 143 | 9.8  | 2 | 3 | 0.9954 | R | GLLAGIGALGLGFN                 | A | 2 | 1271.7237 | 1271.7271 | 0.0034  | 0       | 2.69    | 2.532 | 0.342 | 0   | 1   | 19 | 26  | 1 | 0 | 1 |
| Q5V1H2_HALMA     | 0.9996 | Hypothetical protein                                                                    | <i>rmAC1727</i> | rmAC1727 | 143 | 9.8  | 2 | 3 | 0.9917 | R | GLLAGIGALGLGFN                 | A | 2 | 1271.7237 | 1271.7251 | 0.0013  | 0       | 1.06    | 2.61  | 0.298 | 0   | 1   | 20 | 26  | 1 | 0 | 1 |
| Q5UZQ5_HALMA     | 0.9990 | Tryptophanase (EC 4.1.99.1)                                                             | <i>tnaA</i>     | rmAC2439 | 447 | 8.7  | 2 | 3 | 1      | R | GAENVLFGALLDDGDDVVLNNTHFDTTR   | A | 3 | 2902.4097 | 2904.4282 | 2.0184  | -2.0067 | 4.05    | 4.624 | 0.462 | 0   | 1   | 36 | 104 | 2 | 0 | 1 |
| Q5UZQ5_HALMA     | 0.9990 | Tryptophanase (EC 4.1.99.1)                                                             | <i>tnaA</i>     | rmAC2439 | 447 | 8.7  | 2 | 3 | 1      | R | GAENVLFGALLDDGDDVVLNNTHFDTTR   | A | 3 | 2902.4097 | 2902.4516 | 0.0419  | 0       | 14.44   | 4.111 | 0.33  | 0   | 1   | 31 | 104 | 2 | 0 | 1 |
| Q5UZQ5_HALMA     | 0.9990 | Tryptophanase (EC 4.1.99.1)                                                             | <i>tnaA</i>     | rmAC2439 | 447 | 8.7  | 2 | 3 | 0.9553 | D | IEQVATLGDLLR                   | D | 2 | 1326.7507 | 1327.7054 | 0.9547  | -1.0034 | -36.65  | 2.136 | 0.138 | 2.7 | 2   | 14 | 22  | 2 | 0 | 1 |
| Q5V1F4_HALMA     | 0.9990 | Glutamine ABC transporter permease protein                                              | <i>glnH2</i>    | rmAC1749 | 226 | 15.5 | 3 | 3 | 0.9997 | R | AVETAAGVVLR                    | G | 2 | 1013.5869 | 1014.4654 | 0.8785  | -1.0034 | -123.15 | 3.211 | 0.224 | 0   | 2   | 15 | 18  | 2 | 0 | 1 |
| Q5V1F4_HALMA     | 0.9990 | Glutamine ABC transporter permease protein                                              | <i>glnH2</i>    | rmAC1749 | 226 | 15.5 | 3 | 3 | 0.9697 | R | GALQSVDEGQLEAAR                | A | 2 | 1542.7638 | 1540.7210 | -2.0428 | 2       | -27.73  | 3.567 | 0.187 | 0   | 1   | 20 | 28  | 2 | 0 | 1 |
| Q5V1U8_HALMA     | 0.9990 | Hypothetical protein                                                                    | <i>rmAC1586</i> | rmAC1586 | 470 | 7.4  | 2 | 3 | 1      | R | THLDETQLWSILVGDMSVVGPR         | A | 3 | 2549.2948 | 2549.3098 | 0.0150  | 0       | 5.89    | 3.637 | 0.318 | 0.1 | 6   | 22 | 88  | 2 | 0 | 1 |
| Q5V1U8_HALMA     | 0.9990 | Hypothetical protein                                                                    | <i>rmAC1586</i> | rmAC1586 | 470 | 7.4  | 2 | 3 | 0.9569 | R | TAVFGEAFNIYK                   | F | 2 | 1358.6870 | 1358.9854 | 0.2984  | 0       | 219.64  | 1.808 | 0.185 | 0.6 | 41  | 11 | 22  | 2 | 0 | 1 |
| Q5V1U8_HALMA     | 0.9990 | Hypothetical protein                                                                    | <i>rmAC1586</i> | rmAC1586 | 470 | 7.4  | 2 | 3 | 1      | R | THLDETQLWSILVGDMSVVGPR         | A | 3 | 2549.2948 | 2549.3053 | 0.0104  | 0       | 4.09    | 3.442 | 0.284 | 0   | 2   | 25 | 88  | 2 | 0 | 1 |
| Q5V2M0_HALMA     | 0.9988 | Magnesium Mg(2+)-cobalt Co(2+) transport protein                                        | <i>corA</i>     | rmAC1296 | 205 | 15.6 | 3 | 3 | 1      | R | DVVDHLVQIVDLTETYR              | D | 3 | 2078.0320 | 2078.0381 | 0.0061  | 0       | 2.93    | 3.644 | 0.36  | 0   | 1   | 24 | 64  | 2 | 0 | 1 |
| Q5V2N3_HALMA     | 0.9984 | Hypothetical protein                                                                    | <i>rmAC1281</i> | rmAC1281 | 863 | 3.9  | 2 | 3 | 0.9934 | R | FNVNWLR                        | N | 2 | 946.5388  | 946.5454  | 0.0066  | 0       | 7.00    | 2.031 | 0.09  | 0.4 | 1   | 11 | 12  | 2 | 0 | 1 |
| Q5V2N3_HALMA     | 0.9984 | Hypothetical protein                                                                    | <i>rmAC1281</i> | rmAC1281 | 863 | 3.9  | 2 | 3 | 0.9990 | R | FNVNWLR                        | N | 2 | 946.5388  | 946.5454  | 0.0066  | 0       | 7.00    | 2.377 | 0.175 | 0.2 | 7   | 11 | 12  | 2 | 0 | 1 |
| Q5V2N3_HALMA     | 0.9984 | Hypothetical protein                                                                    | <i>rmAC1281</i> | rmAC1281 | 863 | 3.9  | 2 | 3 | 0.9663 | R | RDQPAQDDPTSTSTEPSVQGPAQAQEGR   | G | 3 | 2820.2910 | 2820.2927 | 0.0017  | 0       | 0.61    | 2.389 | 0.109 | 0.7 |     |    |     |   |   |   |

|              |        |                                                             |                 |          |     |      |   |   |        |   |                                    |   |   |           |           |         |         |        |       |       |     |    |    |     |   |   |   |                       |
|--------------|--------|-------------------------------------------------------------|-----------------|----------|-----|------|---|---|--------|---|------------------------------------|---|---|-----------|-----------|---------|---------|--------|-------|-------|-----|----|----|-----|---|---|---|-----------------------|
| Q5V1F5_HALMA | 1      | Glutamine ABC transporter ATP-binding protein               | <i>glnQ1</i>    | rmAC1747 | 250 | 32.4 | 4 | 2 | 1      | K | GYEHLQVGLLDQADSPYAEISGGQK          | Q | 3 | 2803.3300 | 2804.3182 | 0.9881  | -1.0034 | -5.42  | 7.296 | 0.579 | 0   | 1  | 43 | 100 | 2 | 0 | 1 | Q5V4Y1_HALMA          |
| Q5V1F5_HALMA | 1      | Glutamine ABC transporter ATP-binding protein               | <i>glnQ1</i>    | rmAC1747 | 250 | 32.4 | 4 | 2 | 1      | K | LLLFDEPTSLDPELVGEVVEVMR            | D | 2 | 2670.3826 | 2670.3851 | 0.0025  | 0       | 0.93   | 5.304 | 0.444 | 0   | 1  | 28 | 46  | 2 | 0 | 2 |                       |
| Q5V1F5_HALMA | 1      | Glutamine ABC transporter ATP-binding protein               | <i>glnQ1</i>    | rmAC1747 | 250 | 32.4 | 4 | 2 | 1      | R | SAASDIIFLDGRIVEHGPPQLFENPQAAR      | T | 4 | 3391.6797 | 3393.6909 | 2.0112  | -2.0067 | 1.32   | 5.25  | 0.425 | 0   | 1  | 56 | 180 | 2 | 1 | 1 |                       |
| Q5V4A0_HALMA | 1      | ABC transporter substrate-binding protein                   | <i>abcS-1</i>   | rmAC0647 | 449 | 17.6 | 3 | 2 | 1      | R | IQADNISTVAGVNPQYSGFGEDEMRVFTQAIQR  | L | 3 | 3441.6623 | 3441.6721 | 0.0098  | 0       | 2.85   | 5.612 | 0.363 | 0   | 1  | 35 | 124 | 2 | 1 | 1 |                       |
| Q5V4A0_HALMA | 1      | ABC transporter substrate-binding protein                   | <i>abcS-1</i>   | rmAC0647 | 449 | 17.6 | 3 | 2 | 1      | R | FGNYDIMEVVTMAR                     | E | 3 | 1715.8011 | 1717.8082 | 2.0070  | -2.0067 | 0.20   | 3.429 | 0.28  | 0   | 2  | 23 | 52  | 2 | 0 | 1 | M[147]AEDFLNFLDDETQTR |
| Q5V4B3_HALMA | 1      | Hypothetical protein                                        | <i>rmAC0631</i> | rmAC0631 | 213 | 15   | 2 | 2 | 1      | R | FAFASVPWLTTGAALAASLGR              | L | 3 | 2005.0785 | 2006.0782 | 0.9996  | -1.0034 | -1.85  | 4.451 | 0.391 | 0   | 1  | 35 | 76  | 2 | 0 | 1 |                       |
| Q5V4B3_HALMA | 1      | Hypothetical protein                                        | <i>rmAC0631</i> | rmAC0631 | 213 | 15   | 2 | 2 | 1      | R | LDDELQIQEGVVR                      | S | 2 | 1411.7671 | 1411.7689 | 0.0018  | 0       | 1.25   | 2.897 | 0.441 | 0   | 1  | 19 | 22  | 2 | 0 | 1 |                       |
| Q5V4H5_HALMA | 1      | Phosphoenolpyruvate carboxylase (EC 4.1.1.31)               | <i>pepC</i>     | rmAC0562 | 898 | 4.7  | 2 | 2 | 1      | R | GADPEEFQVLEEDVLQPTFTTAHPTEAR       | R | 3 | 3138.5146 | 3138.5249 | 0.0103  | 0       | 3.28   | 5.842 | 0.558 | 0   | 1  | 43 | 108 | 2 | 0 | 1 |                       |
| Q5V4H5_HALMA | 1      | Phosphoenolpyruvate carboxylase (EC 4.1.1.31)               | <i>pepC</i>     | rmAC0562 | 898 | 4.7  | 2 | 2 | 1      | R | RNPYVDPLNLLQVR                     | L | 3 | 1695.9420 | 1695.9441 | 0.0020  | 0       | 1.20   | 3.622 | 0.208 | 0   | 1  | 30 | 52  | 2 | 0 | 1 | M[147]AEDFLNFLDDETQTR |
| Q5V612_HALMA | 1      | Spermidine/putrescine transporter substrate binding protein | <i>potD1</i>    | pNG7346  | 397 | 8.6  | 2 | 2 | 1      | K | GFWVFPQHDAAVAMDAK                  | E | 3 | 1975.9039 | 1975.9121 | 0.0082  | 0       | 4.15   | 3.087 | 0.344 | 0.1 | 2  | 25 | 64  | 2 | 0 | 1 |                       |
| Q5V612_HALMA | 1      | Spermidine/putrescine transporter substrate binding protein | <i>potD1</i>    | pNG7346  | 397 | 8.6  | 2 | 2 | 1      | R | MAEDFLNFLDDETQTR                   | W | 3 | 2028.9513 | 2028.9382 | -0.0132 | 0       | -6.48  | 3.635 | 0.33  | 0   | 1  | 23 | 64  | 2 | 0 | 1 |                       |
| Q5V655_HALMA | 1      | Serine/threonine protein phosphatase (EC 3.1.3.16)          | <i>pphA</i>     | pNG7301  | 236 | 13.1 | 2 | 2 | 1      | K | SIAEHELTELLNMR                     | S | 3 | 1654.8348 | 1654.8427 | 0.0079  | 0       | 4.78   | 3.789 | 0.316 | 0   | 2  | 24 | 52  | 2 | 0 | 1 |                       |
| Q5V655_HALMA | 1      | Serine/threonine protein phosphatase (EC 3.1.3.16)          | <i>pphA</i>     | pNG7301  | 236 | 13.1 | 2 | 2 | 0.9999 | K | LDPTPDELVVFGDLVR                   | K | 3 | 1883.0040 | 1884.0100 | 1.0060  | -1.0034 | 1.41   | 3.193 | 0.272 | 0.2 | 2  | 26 | 64  | 2 | 0 | 1 | M[147]VQAIQEALADR     |
| Q5UX08_HALMA | 0.9999 | Hypothetical protein                                        | <i>rmAC3528</i> | rmAC3528 | 158 | 35.4 | 2 | 2 | 1      | R | VVFQSDNGDTSATLASASGPNA             | - | 2 | 2107.9658 | 2107.9630 | -0.0028 | 0       | -1.35  | 5.013 | 0.532 | 0   | 1  | 23 | 42  | 2 | 0 | 1 |                       |
| Q5UX08_HALMA | 0.9999 | Hypothetical protein                                        | <i>rmAC3528</i> | rmAC3528 | 158 | 35.4 | 2 | 2 | 0.9970 | N | TPQASIFSTDYDSSGGGSGEGAVTITHDGGDSIK | G | 3 | 3271.4389 | 3273.4531 | 2.0142  | -2.0067 | 2.30   | 3.338 | 0.342 | 0   | 1  | 32 | 132 | 1 | 0 | 1 |                       |
| Q5UX47_HALMA | 0.9999 | Sensor protein (EC 2.7.13.3)                                | <i>ark-6</i>    | rmAC3482 | 579 | 5.9  | 2 | 2 | 1      | R | HDIRNEMNVVK                        | G | 3 | 1353.6823 | 1353.6828 | 0.0004  | 0       | 0.32   | 3.049 | 0.341 | 0.1 | 1  | 18 | 40  | 2 | 1 | 1 |                       |
| Q5UX47_HALMA | 0.9999 | Sensor protein (EC 2.7.13.3)                                | <i>ark-6</i>    | rmAC3482 | 579 | 5.9  | 2 | 2 | 0.9970 | R | ADRTPGVHVAVHDNGPGITTDHER           | E | 5 | 2449.1847 | 2449.1929 | 0.0082  | 0       | 3.34   | 2.748 | 0.155 | 1.9 | 7  | 47 | 176 | 2 | 1 | 1 | M[147]VQAIQEALADR     |
| Q5UYC5_HALMA | 0.9999 | Precorin-2 C20-methyltransferase                            | <i>cbiL</i>     | rmAC3000 | 265 | 17   | 2 | 2 | 1      | K | VTDPAITHEGLVEAGYDVVYGR             | R | 2 | 2318.1179 | 2318.3454 | 0.2275  | 0       | 98.15  | 4.125 | 0.574 | 0   | 1  | 21 | 42  | 2 | 0 | 1 |                       |
| Q5UYC5_HALMA | 0.9999 | Precorin-2 C20-methyltransferase                            | <i>cbiL</i>     | rmAC3000 | 265 | 17   | 2 | 2 | 0.9967 | R | DGDAAFVTLGDPNNYSTFGHLRR            | L | 4 | 2507.2193 | 2507.2224 | 0.0030  | 0       | 1.21   | 2.899 | 0.049 | 1.1 | 1  | 38 | 132 | 2 | 0 | 1 |                       |
| Q5UZ75_HALMA | 0.9999 | Hypothetical protein                                        | <i>rmAC2647</i> | rmAC2647 | 234 | 7.7  | 1 | 2 | 0.9991 | R | VHLLRPTDSPTQTPETANY                | - | 3 | 2038.0119 | 2038.0070 | -0.0049 | 0       | -2.40  | 2.546 | 0.194 | 0.5 | 1  | 25 | 68  | 2 | 0 | 1 |                       |
| Q5UZ75_HALMA | 0.9999 | Hypothetical protein                                        | <i>rmAC2647</i> | rmAC2647 | 234 | 7.7  | 1 | 2 | 1      | R | VHLLRPTDSPTQTPETANY                | - | 2 | 2038.0119 | 2039.0257 | 1.0138  | -1.0034 | 5.13   | 3.779 | 0.462 | 0   | 1  | 15 | 34  | 2 | 0 | 1 | M[147]VQAIQEALADR     |
| Q5UZW8_HALMA | 0.9999 | Hypothetical protein                                        | <i>rmAC2368</i> | rmAC2368 | 344 | 5.5  | 1 | 2 | 0.9998 | R | AHEDPDETELRPEQTEFDP                | - | 2 | 2253.9662 | 2254.9674 | 1.0012  | -1.0034 | -0.97  | 3.072 | 0.306 | 0   | 1  | 19 | 36  | 2 | 0 | 1 |                       |
| Q5UZW8_HALMA | 0.9999 | Hypothetical protein                                        | <i>rmAC2368</i> | rmAC2368 | 344 | 5.5  | 1 | 2 | 0.9984 | R | AHEDPDETELRPEQTEFDP                | - | 3 | 2253.9662 | 2253.9690 | 0.0027  | 0       | 1.21   | 2.469 | 0.182 | 0.1 | 1  | 24 | 72  | 2 | 0 | 1 |                       |
| Q5V0H0_HALMA | 0.9999 | Inosine monophosphate dehydrogenase (EC 1.1.1.205)          | <i>imd3</i>     | rmAC2139 | 358 | 12   | 2 | 2 | 0.9991 | R | NELGSVLDRGDVSDERRREEVLSAFR         | V | 4 | 2847.4111 | 2847.4121 | 0.0009  | 0       | 0.33   | 2.956 | 0.207 | 0.2 | 7  | 32 | 144 | 2 | 2 | 1 |                       |
| Q5V0H0_HALMA | 0.9999 | Inosine monophosphate dehydrogenase (EC 1.1.1.205)          | <i>imd3</i>     | rmAC2139 | 358 | 12   | 2 | 2 | 1      | R | EDIVALSPTDDATNAER                  | I | 2 | 1930.8756 | 1930.8745 | -0.0011 | 0       | -0.59  | 3.326 | 0.488 | 0   | 1  | 19 | 34  | 2 | 0 | 1 | M[147]VQAIQEALADR     |
| Q5V508_HALMA | 0.9999 | Hypothetical protein                                        | <i>rmAC0347</i> | rmAC0347 | 149 | 12.1 | 2 | 2 | 1      | R | LAQAYAEQLQEK                       | L | 2 | 1390.7092 | 1391.6206 | 0.9114  | -1.0034 | -66.15 | 3.38  | 0.327 | 0   | 1  | 15 | 22  | 2 | 0 | 1 |                       |
| Q5V508_HALMA | 0.9999 | Hypothetical protein                                        | <i>rmAC0347</i> | rmAC0347 | 149 | 12.1 | 2 | 2 | 0.9954 | R | LAQAYAEQLQEKLESNGR                 | W | 3 | 2047.0334 | 2048.0249 | 0.9915  | -1.0034 | -5.79  | 2.578 | 0.231 | 0.2 | 1  | 23 | 68  | 2 | 1 | 1 |                       |
| Q5V5S2_HALMA | 0.9999 | ABC transporter ATP-binding protein                         | <i>rmAC0048</i> | rmAC0048 | 313 | 11.8 | 2 | 2 | 0.9990 | R | LLEGLADRGVTTLVTTYHMEEAQR           | L | 4 | 2714.4061 | 2714.4167 | 0.0106  | 0       | 3.89   | 2.591 | 0.157 | 1   | 2  | 35 | 138 | 2 | 1 | 1 |                       |
| Q5V5S2_HALMA | 0.9999 | ABC transporter ATP-binding protein                         | <i>rmAC0048</i> | rmAC0048 | 313 | 11.8 | 2 | 2 | 0.9997 | R | ILHLPQSFAPHER                      | L | 3 | 1463.7885 | 1463.7901 | 0.0016  | 0       | 1.09   | 3.077 | 0.164 | 0.2 | 1  | 24 | 48  | 2 | 0 | 1 | M[147]VQAIQEALADR     |
| Q5V5W4_HALMA | 0.9999 | Carbamoyl phosphate synthase L chain (EC 6.3.4.16)          | <i>accC2</i>    | rmAC0002 | 616 | 5.2  | 2 | 2 | 0.9987 | K | IVHDPEEAEGQLESAKR                  | E | 4 | 1978.9596 | 1978.9575 | -0.0022 | 0       | -1.09  | 3.531 | 0.208 | 0.2 | 31 | 32 | 96  | 2 | 0 | 1 |                       |

|              |        |                                                                                    |                 |          |     |      |   |   |        |   |                                  |           |           |           |           |         |         |         |       |       |     |     |    |     |   |   |   |
|--------------|--------|------------------------------------------------------------------------------------|-----------------|----------|-----|------|---|---|--------|---|----------------------------------|-----------|-----------|-----------|-----------|---------|---------|---------|-------|-------|-----|-----|----|-----|---|---|---|
| Q5UXK8_HALMA | 0.9791 | Peptidyl-prolyl cis-trans isomerase slr1251 (EC 5.2.1.8)                           | <i>ppiB1</i>    | rmAC3303 | 209 | 6.2  | 1 | 2 | 1      | K | RIDPLYTDIDHHR                    | I         | 3         | 1625.8525 | 1625.8544 | 0.0019  | 0       | 1.15    | 5.537 | 0.444 | 0   | 1   | 29 | 48  | 2 | 0 | 1 |
| Q5UXK8_HALMA | 0.9791 | Peptidyl-prolyl cis-trans isomerase slr1251 (EC 5.2.1.8)                           | <i>ppiB1</i>    | rmAC3303 | 209 | 6.2  | 1 | 2 | 1      | K | RIDPLYTDIDHHR                    | I         | 3         | 1625.8525 | 1625.8549 | 0.0024  | 0       | 1.49    | 4.975 | 0.453 | 0   | 1   | 31 | 48  | 2 | 0 | 1 |
| Q5UY11_HALMA | 0.9791 | Hypothetical protein                                                               | <i>rmAC3134</i> | rmAC3134 | 192 | 6.8  | 1 | 2 | 1      | R | LGSAHLHQGLINPR                   | F         | 3         | 1374.7732 | 1374.7739 | 0.0007  | 0       | 0.53    | 3.258 | 0.358 | 0   | 3   | 21 | 48  | 2 | 0 | 1 |
| Q5UYW2_HALMA | 0.9791 | Hypothetical protein                                                               | <i>rmAC3134</i> | rmAC3134 | 192 | 6.8  | 1 | 2 | 0.9019 | R | LGSALHQGLINPR                    | F         | 3         | 1374.7732 | 1374.7770 | 0.0037  | 0       | 2.72    | 2.208 | 0.097 | 1.6 | 359 | 15 | 48  | 2 | 0 | 1 |
| Q5UYW2_HALMA | 0.9791 | DNA damage-inducible protein                                                       | <i>dip2</i>     | rmAC2783 | 431 | 3.9  | 1 | 2 | 1      | R | VVALGVPPFVNLNIGSR                | A         | 3         | 1724.0349 | 1724.0366 | 0.0017  | 0       | 1.00    | 3.829 | 0.417 | 0   | 1   | 33 | 64  | 2 | 0 | 1 |
| Q5UYW2_HALMA | 0.9791 | DNA damage-inducible protein                                                       | <i>dip2</i>     | rmAC2783 | 431 | 3.9  | 1 | 2 | 1      | R | VVALGVPPFVNLNIGSR                | A         | 3         | 1724.0349 | 1724.0365 | 0.0015  | 0       | 0.89    | 4.081 | 0.482 | 0   | 1   | 33 | 64  | 2 | 0 | 1 |
| Q5UYW2_HALMA | 0.9791 | Hypothetical protein                                                               | <i>rmAC2757</i> | rmAC2757 | 729 | 8.1  | 2 | 2 | 1      | R | VGDAQADERGEAPAGDITDSEPSQAVETEPTR | I         | 3         | 3285.4505 | 3286.4782 | 1.0276  | -1.0034 | 7.40    | 3.477 | 0.354 | 0   | 1   | 28 | 124 | 2 | 1 | 1 |
| Q5UYW2_HALMA | 0.9791 | Hypothetical protein                                                               | <i>rmAC2757</i> | rmAC2757 | 729 | 8.1  | 2 | 2 | 1      | R | VGDAQADERGEAPAGDITDSEPSQAVETEPTR | I         | 3         | 3285.4505 | 3287.4682 | 2.0176  | -2.0067 | 3.33    | 4.623 | 0.438 | 0   | 1   | 34 | 124 | 2 | 1 | 1 |
| Q5UZ20_HALMA | 0.9791 | O-acetylhomoserine (Thiol)-lyase (EC 2.5.1.49)                                     | <i>cysD</i>     | rmAC2716 | 432 | 6.9  | 1 | 2 | 1      | K | TLIHHPASTTHQQLTDEEKAAAGVTTDDMVR  | L         | 4         | 3247.6143 | 3247.6276 | 0.0133  | 0       | 4.10    | 4.082 | 0.333 | 0   | 1   | 49 | 174 | 2 | 1 | 1 |
| Q5UZ20_HALMA | 0.9791 | O-acetylhomoserine (Thiol)-lyase (EC 2.5.1.49)                                     | <i>cysD</i>     | rmAC2716 | 432 | 6.9  | 1 | 2 | 0.9999 | K | TLIHHPASTTHQQLTDEEKAAAGVTTDDMVR  | L         | 4         | 3247.6143 | 3249.6306 | 2.0162  | -2.0067 | 2.94    | 4.095 | 0.28  | 0.1 | 1   | 40 | 174 | 2 | 1 | 1 |
| Q5UZ59_HALMA | 0.9791 | Hypothetical protein                                                               | <i>rmAC2666</i> | rmAC2666 | 185 | 9.7  | 1 | 2 | 1      | R | GIFTQDQQTASDGTDPDDL              | I         | 2         | 1923.8446 | 1923.8496 | 0.0050  | 0       | 2.58    | 5.068 | 0.493 | 0   | 1   | 22 | 34  | 2 | 0 | 1 |
| Q5UZ59_HALMA | 0.9791 | Hypothetical protein                                                               | <i>rmAC2666</i> | rmAC2666 | 185 | 9.7  | 1 | 2 | 1      | R | GIFTQDQQTASDGTDPDDL              | I         | 2         | 1923.8446 | 1924.8469 | 1.0023  | -1.0034 | -0.56   | 4.383 | 0.424 | 0   | 1   | 24 | 34  | 2 | 0 | 1 |
| Q5UZ59_HALMA | 0.9791 | Phosphate transporter family protein                                               | <i>rmAC2586</i> | rmAC2586 | 354 | 3.4  | 1 | 2 | 1      | K | ALAQDYSSLGPR                     | R         | 2         | 1276.6411 | 1276.6454 | 0.0043  | 0       | 3.39    | 3.258 | 0.521 | 0   | 1   | 19 | 22  | 2 | 0 | 1 |
| Q5UZ59_HALMA | 0.9791 | Phosphate transporter family protein                                               | <i>rmAC2586</i> | rmAC2586 | 354 | 3.4  | 1 | 2 | 1      | K | ALAQDYSSLGPR                     | R         | 2         | 1276.6411 | 1276.6454 | 0.0043  | 0       | 3.39    | 3.228 | 0.484 | 0   | 1   | 19 | 22  | 2 | 0 | 1 |
| Q5UZ59_HALMA | 0.9791 | Hypothetical protein                                                               | <i>rmAC2411</i> | rmAC2411 | 137 | 12.4 | 1 | 2 | 0.9994 | - | 2                                | 2114.9585 | 2114.9576 | -0.0009   | 0         | -0.43   | 2.804   | 0.308   | 0     | 1     | 20  | 32  | 2  | 1   | 1 |   |   |
| Q5UZ59_HALMA | 0.9791 | Hypothetical protein                                                               | <i>rmAC2411</i> | rmAC2411 | 137 | 12.4 | 1 | 2 | 1      | R | GEAYNEWIDDLYDRFLP                | -         | 2         | 2114.9585 | 2114.9542 | -0.0043 | 0       | -2.05   | 3.107 | 0.421 | 0   | 1   | 17 | 32  | 2 | 1 | 1 |
| Q5V028_HALMA | 0.9791 | Archaeal histone A1                                                                | <i>hpyA</i>     | rmAC2301 | 145 | 15.9 | 1 | 2 | 1      | R | VALASLLETYADETAATAAALALR         | H         | 3         | 2261.1903 | 2261.2016 | 0.0113  | 0       | 5.00    | 4.933 | 0.426 | 0   | 1   | 36 | 88  | 2 | 0 | 1 |
| Q5V028_HALMA | 0.9791 | Archaeal histone A1                                                                | <i>hpyA</i>     | rmAC2301 | 145 | 15.9 | 1 | 2 | 1      | R | VALASLLETYADETAATAAALALR         | H         | 3         | 2261.1903 | 2261.1989 | 0.0086  | 0       | 3.78    | 5.188 | 0.465 | 0   | 1   | 36 | 88  | 2 | 0 | 1 |
| Q5V0G7_HALMA | 0.9791 | Hypothetical protein                                                               | <i>rmAC2142</i> | rmAC2142 | 99  | 16.2 | 1 | 2 | 1      | M | PSSISNTVFSEPSGPR                 | I         | 2         | 1660.8056 | 1660.8054 | -0.0002 | 0       | -0.11   | 4.156 | 0.442 | 0   | 1   | 16 | 30  | 2 | 0 | 1 |
| Q5V0G7_HALMA | 0.9791 | Hypothetical protein                                                               | <i>rmAC2142</i> | rmAC2142 | 99  | 16.2 | 1 | 2 | 0.9992 | I | 2                                | 1660.8056 | 1660.8054 | -0.0002   | 0         | -0.11   | 3.041   | 0.377   | 0     | 1     | 15  | 16  | 30 | 2   | 0 | 1 |   |
| Q5V0G9_HALMA | 0.9791 | Oxidoreductase short-chain dehydrogenase/reductase family                          | <i>sdv2</i>     | rmAC2140 | 313 | 3.8  | 1 | 2 | 1      | K | LANLLFAYELQR                     | R         | 2         | 1449.7980 | 1450.7292 | 0.9312  | -1.0034 | -49.77  | 2.957 | 0.409 | 0   | 1   | 16 | 22  | 2 | 0 | 1 |
| Q5V0G9_HALMA | 0.9791 | Oxidoreductase short-chain dehydrogenase/reductase family                          | <i>sdv2</i>     | rmAC2140 | 313 | 3.8  | 1 | 2 | 0.9996 | R | 2                                | 1449.7980 | 1450.7279 | 0.9299    | -1.0034   | -50.69  | 2.816   | 0.273   | 0     | 1     | 16  | 22  | 2  | 0   | 1 |   |   |
| Q5V0L5_HALMA | 0.9791 | Hypothetical protein                                                               | <i>rmAC2085</i> | rmAC2085 | 173 | 15   | 1 | 2 | 1      | R | ISDKQDVIDIKDAVYDGDVVVADITR       | H         | 4         | 2861.4658 | 2861.4736 | 0.0078  | 0       | 2.71    | 3.792 | 0.317 | 0.2 | 2   | 40 | 150 | 2 | 2 | 1 |
| Q5V0L5_HALMA | 0.9791 | Hypothetical protein                                                               | <i>rmAC2085</i> | rmAC2085 | 173 | 15   | 1 | 2 | 1      | R | ISDKQDVIDIKDAVYDGDVVVADITR       | H         | 4         | 2861.4658 | 2861.4746 | 0.0087  | 0       | 3.05    | 3.821 | 0.31  | 0.1 | 1   | 42 | 150 | 2 | 2 | 1 |
| Q5V0L7_HALMA | 0.9791 | ABC transporter permease protein                                                   | <i>yadH</i>     | rmAC2083 | 255 | 6.3  | 1 | 2 | 1      | R | NVSLTNPVMVYMNNGVR                | Y         | 2         | 1804.9328 | 1806.8054 | 1.8726  | -2.0067 | -74.28  | 4.122 | 0.422 | 0   | 1   | 20 | 30  | 2 | 0 | 1 |
| Q5V1V1_HALMA | 0.9791 | LPS glycosyltransferase                                                            | <i>icsA</i>     | rmAC1583 | 380 | 2.9  | 1 | 2 | 1      | K | HGHTWAEFANR                      | V         | 3         | 1324.6061 | 1324.5982 | -0.0080 | 0       | -6.00   | 2.998 | 0.254 | 0.2 | 1   | 22 | 40  | 2 | 0 | 1 |
| Q5V1V1_HALMA | 0.9791 | LPS glycosyltransferase                                                            | <i>icsA</i>     | rmAC1583 | 380 | 2.9  | 1 | 2 | 0.9979 | K | HGHTWAEFANR                      | V         | 3         | 1324.6061 | 1325.2882 | 0.6820  | -1.0034 | -242.56 | 2.612 | 0.211 | 0.1 | 9   | 18 | 40  | 2 | 0 | 1 |
| Q5V254_HALMA | 0.9791 | Hypothetical protein                                                               | <i>rmAC1473</i> | rmAC1473 | 115 | 19.1 | 1 | 2 | 1      | K | VEGFVLFTEDVPSSVSAGDVIR           | A         | 2         | 2322.1743 | 2322.1832 | 0.0089  | 0       | 3.82    | 5.261 | 0.515 | 0   | 1   | 24 | 42  | 2 | 0 | 1 |
| Q5V254_HALMA | 0.9791 | Hypothetical protein                                                               | <i>rmAC1473</i> | rmAC1473 | 115 | 19.1 | 1 | 2 | 1      | K | VEGFVLFTEDVPSSVSAGDVIR           | A         | 2         | 2322.1743 | 2322.1805 | 0.0062  | 0       | 2.67    | 5.843 | 0.528 | 0   | 1   | 26 | 42  | 2 | 0 | 1 |
| Q5V2B9_HALMA | 0.9791 | Universal stress protein                                                           | <i>usp28</i>    | rmAC1404 | 137 | 19   | 1 | 2 | 1      | R | GQAAFVAELPSAETIEAVITHALTK        | E         | 3         | 2695.4068 | 2695.4097 | 0.0029  | 0       | 1.06    | 4.556 | 0.429 | 0   | 1   | 32 | 100 | 2 | 0 | 1 |
| Q5V2B9_HALMA | 0.9791 | Universal stress protein                                                           | <i>usp28</i>    | rmAC1404 | 137 | 19   | 1 | 2 | 1      | R | GQAAFVAELPSAETIEAVITHALTK        | E         | 3         | 2695.4068 | 2695.4161 | 0.0093  | 0       | 3.44    | 3.999 | 0.485 | 0   | 1   | 28 | 100 | 2 | 0 | 1 |
| Q5V2E9_HALMA | 0.9791 | Hypothetical protein                                                               | <i>rmAC1374</i> | rmAC1374 | 40  | 40   | 1 | 2 | 1      | R | NQVTALIEEQISELVLDQ               | -         | 3         | 1814.8898 | 1815.8782 | 0.9883  | -1.0034 | -8.27   | 3.775 | 0.351 | 0   | 1   | 30 | 60  | 2 | 0 | 1 |
| Q5V2E9_HALMA | 0.9791 | Hypothetical protein                                                               | <i>rmAC1374</i> | rmAC1374 | 40  | 40   | 1 | 2 | 1      | R | NQVTALIEEQISELVLDQ               | -         | 3         | 1814.8898 | 1814.8936 | 0.0038  | 0       | 2.07    | 3.562 | 0.266 | 0.1 | 2   | 25 | 60  | 2 | 0 | 1 |
| Q5V2P3_HALMA | 0.9791 | Putative 2-ketoglutarate ferredoxin oxidoreductase (Beta) (EC 1.2.7.3)(EC 1.2.7.1) | <i>korB</i>     | rmAC1268 | 312 | 6.1  | 1 | 2 | 1      | K | SPIRPLSQLNAGATYIAR               | T         | 3         | 2055.1225 | 2055.1301 | 0.0076  | 0       | 3.71    | 4.067 | 0.364 | 0   | 1   | 34 | 72  | 2 | 0 | 1 |
| Q5V2P3_HALMA | 0.9791 | Putative 2-ketoglutarate ferredoxin oxidoreductase (Beta) (EC 1.2.7.3)(EC 1.2.7.1) | <i>korB</i>     | rmAC1268 | 312 | 6.1  | 1 | 2 | 0.9999 | K | SPIRPLSQLNAGATYIAR               | T         | 3         | 2055.1225 | 2055.1292 | 0.0067  | 0       | 3.26    | 4.143 | 0.164 | 0   | 1   | 32 | 72  | 2 | 0 | 1 |
| Q5V2S7_HALMA | 0.9791 | Threonine dehydratase (EC 4.3.1.19)                                                | <i>ilvA1</i>    | rmAC1231 | 342 | 5.3  | 1 | 2 | 1      | R | VPFALPTEILQAGLADFR               | L         | 2         | 1957.0673 | 1958.0654 | 0.9981  | -1.0034 | -2.67   | 4.94  | 0.634 | 0   | 1   | 28 | 34  | 2 | 0 | 1 |
| Q5V2S7_HALMA | 0.9791 | Threonine dehydratase (EC 4.3.1.19)                                                | <i>ilvA1</i>    | rmAC1231 | 342 | 5.3  | 1 | 2 | 1      | R | VPFALPTEILQAGLADFR               | L         | 2         | 1957.0673 | 1958.9654 | 1.8981  | -2.0067 | -55.48  | 4.74  | 0.412 | 0   | 1   | 26 | 34  | 2 | 0 | 1 |
| Q5V2Z6_HALMA | 0.9791 | Hypothetical protein                                                               | <i>rmAC1155</i> | rmAC1155 | 182 | 13.2 | 1 | 2 | 1      | R | SGETVADTASTGQLPVGDTDDVTK         | S         | 2         | 2363.0976 | 2363.1009 | 0.0033  | 0       | 1.40    | 4.081 | 0.489 | 0   | 1   | 23 | 46  | 2 | 0 | 1 |
| Q5V2Z6_HALMA | 0.9791 | Hypothetical protein                                                               | <i>rmAC1155</i> | rmAC1155 | 182 | 13.2 | 1 | 2 | 1      | R | SGETVADTASTGQLPVGDTDDVTK         | S         | 2         | 2363.0976 | 2364.1065 | 1.0089  | -1.0034 | 2.36    | 5.877 | 0.56  | 0   | 1   | 25 | 46  | 2 | 0 | 1 |
| Q5V3B1_HALMA | 0.9791 | Hypothetical protein                                                               | <i>rmAC1026</i> | rmAC1026 | 364 | 4.7  | 1 | 2 | 1      | R | VIASDPSLFVNAMLER                 | G         | 3         | 1859.9815 | 1860.9792 | 0.9977  | -1.0034 | -3.05   | 5.789 | 0.467 | 0   | 1   | 33 | 64  | 2 | 0 | 1 |
| Q5V3B1_HALMA | 0.9791 | Hypothetical protein                                                               | <i>rmAC1026</i> | rmAC1026 | 364 | 4.7  | 1 | 2 | 1      | R | VIASDPSLFVNAMLER                 | G         | 3         | 1859.9815 | 1859.9857 | 0.0042  | 0       | 2.23    | 5.455 | 0.493 | 0   | 1   | 37 | 64  | 2 | 0 | 1 |
| Q5V4K5_HALMA | 0.9791 | Hypothetical protein                                                               | <i>rmAC0527</i> | rmAC0527 | 150 | 11.3 | 1 | 2 | 1      | Y | ASATLLFTGGHLAATR                 | Y         | 3         | 1698.9417 | 1698.9419 | 0.0001  | 0       | 0.08    | 3.958 | 0.537 | 0   | 1   | 32 | 64  | 2 | 0 | 1 |
| Q5V4K5_HALMA | 0.9791 | Hypothetical protein                                                               | <i>rmAC0527</i> | rmAC0527 | 150 | 11.3 | 1 | 2 | 1      | Y | ASATLLFTGGHLAATR                 | Y         | 3         | 1698.9417 | 1698.9444 | 0.0027  | 0       | 1.59    | 4.438 | 0.541 | 0   | 1   | 36 | 64  | 2 | 0 | 1 |
| Q5V4P6_HALMA | 0.9791 | Hypothetical protein                                                               | <i>rmAC0481</i> | rmAC0481 | 297 | 4.4  | 1 | 2 | 1      | R | VAPVSLDIIDGK                     | A         | 2         | 1338.7758 | 1338.7854 | 0.0096  | 0       | 7.19    | 2.438 | 0.453 | 0   | 1   | 16 | 24  | 2 | 0 | 1 |
| Q5V4P6_HALMA | 0.9791 | Hypothetical protein                                                               | <i>rmAC0481</i> | rmAC0481 | 297 | 4.4  | 1 | 2 | 1      | R | VAPVSLDIIDGK                     | A         | 2         | 1338.7758 | 1338.7787 | 0.0028  | 0       | 2.12    | 2.692 | 0.42  | 0   | 1   | 17 | 24  | 2 | 0 | 1 |
| Q5V569_HALMA | 0.9791 | Hypothetical protein                                                               | <i>rmAC0277</i> | rmAC0277 | 206 | 9.2  | 1 | 2 | 1      | R | DAMLPEWEILLAAASPVVGR             | L         | 3         | 2050.1285 | 2050.1354 | 0.0069  | 0       | 3.35    | 4.812 | 0.373 | 0   | 1   | 33 | 72  | 2 | 0 | 1 |
| Q5V569_HALMA | 0.9791 | Hypothetical protein                                                               | <i>rmAC0277</i> | rmAC0277 | 206 | 9.2  | 1 | 2 | 1      | R | DAMLPEWEILLAAASPVVGR             | L         | 3         | 2050.1285 | 2050.1330 | 0.0045  | 0       | 2.19    | 5.142 | 0.412 | 0   | 1   | 37 | 72  | 2 | 0 | 1 |
| Q5V569_HALMA | 0.9791 | Hypothetical protein                                                               | <i>pNG7056</i>  | pNG7056  | 336 | 3.6  | 1 | 2 | 1      | F | GVVAEYQGTYYR                     | E         | 2         | 1340.6724 | 1340.6654 | -0.0070 | 0       | -5.20   | 3.096 | 0.472 | 0   | 1   | 18 | 22  | 2 | 0 | 1 |
| Q5V0M1_HALMA | 0.9770 | Hypothetical protein                                                               | <i>rmAC2079</i> | rmAC2079 | 221 | 5.9  | 1 | 2 | 0.9999 | K | AEKFEKFDENVHR                    | L         | 4         | 1647.8005 | 1647.8029 | 0.0024  | 0       | 1.46    | 3.339 | 0.201 | 0.1 | 1   | 34 | 72  | 2 | 2 | 1 |
| Q5V0M1_HALMA | 0.9770 | Hypothetical protein                                                               |                 |          |     |      |   |   |        |   |                                  |           |           |           |           |         |         |         |       |       |     |     |    |     |   |   |   |

|                  |        |                                                                                  |                 |          |     |      |   |   |        |   |                                 |   |   |           |           |         |         |        |       |       |     |    |    |     |   |   |   |
|------------------|--------|----------------------------------------------------------------------------------|-----------------|----------|-----|------|---|---|--------|---|---------------------------------|---|---|-----------|-----------|---------|---------|--------|-------|-------|-----|----|----|-----|---|---|---|
| Q5UZ03_HALMA     | 0.9791 | Hypothetical protein                                                             | <i>rmaC2735</i> | rmAC2735 | 365 | 5.5  | 1 | 1 | 1      | R | AVGEEVDTVLASAASESDVR            | A | 3 | 2030.0168 | 2030.0178 | 0.0010  | 0       | 0.47   | 3.948 | 0.27  | 0   | 1  | 31 | 76  | 2 | 0 | 1 |
| Q5UZH5_HALMA     | 0.9791 | Hypothetical protein                                                             | <i>rmaC2525</i> | rmAC2525 | 244 | 9    | 1 | 1 | 1      | R | FSLAMFGRPVAVPDVTEEYGR           | L | 3 | 2453.2413 | 2453.2428 | 0.0015  | 0       | 0.61   | 3.948 | 0.357 | 0   | 1  | 30 | 84  | 2 | 0 | 1 |
| Q5UZI0_HALMA     | 0.9791 | Glutathione S-transferase N-terminal domain                                      | <i>gstN</i>     | rmAC2520 | 82  | 25.6 | 1 | 1 | 1      | K | KLDLGLDYESHMVPRPHGR             | T | 4 | 2477.2121 | 2477.2204 | 0.0083  | 0       | 3.34   | 3.42  | 0.25  | 0.1 | 2  | 34 | 120 | 2 | 0 | 1 |
| Q5V0G1_HALMA     | 0.9791 | Phosphate ABC transporter permease protein                                       | <i>pstC2</i>    | rmAC2148 | 373 | 4.6  | 1 | 1 | 1      | M | TDIPTTTEGEAVSGGDR               | V | 2 | 1732.7751 | 1732.7854 | 0.0103  | 0       | 5.96   | 4.04  | 0.464 | 0   | 1  | 26 | 32  | 2 | 0 | 1 |
| Q5V0I8_HALMA     | 0.9791 | Hypothetical protein                                                             | <i>rmaC2114</i> | rmAC2114 | 468 | 5.1  | 1 | 1 | 1      | R | LLAAGPAHADGAHG2FVFDVSDR         | Q | 4 | 2418.2080 | 2418.2016 | -0.0064 | 0       | -2.65  | 2.352 | 0.299 | 0.7 | 1  | 34 | 138 | 2 | 0 | 1 |
| Q5V0Q7_HALMA     | 0.9791 | Oligopeptide ABC transporter solute-binding protein                              | <i>oppA</i>     | rmAC2039 | 649 | 2.3  | 1 | 1 | 1      | R | AEAVDDIQEGGTTLR                 | F | 2 | 1571.7791 | 1571.7784 | -0.0007 | 0       | -0.45  | 4.156 | 0.432 | 0   | 1  | 22 | 28  | 2 | 0 | 1 |
| Q5V0Z7_HALMA     | 0.9791 | Cobalamin adenosyltransferase (EC 2.5.1.17)                                      | <i>cobI</i>     | rmAC1936 | 216 | 14.4 | 1 | 1 | 1      | R | GLVDPADVIGLIEAKPDDLELVLTGGHERPK | F | 5 | 3265.7558 | 3266.7736 | 1.0178  | -1.0034 | 4.42   | 4.357 | 0.456 | 0   | 1  | 59 | 240 | 2 | 0 | 1 |
| Q5V1L1_HALMA     | 0.9791 | Hypothetical protein                                                             | <i>rmaC1682</i> | rmAC1682 | 110 | 22.7 | 1 | 1 | 1      | R | DRTTADLLAGDESSASESSGEMNR        | K | 3 | 2613.1096 | 2613.1118 | 0.0022  | 0       | 0.85   | 7.16  | 0.58  | 0   | 1  | 47 | 96  | 2 | 1 | 1 |
| Q5V1N5_HALMA     | 0.9791 | Hypothetical protein                                                             | <i>rmaC1654</i> | rmAC1654 | 190 | 23.7 | 2 | 1 | 1      | R | EITTESPGQLNIALR                 | N | 2 | 1652.9097 | 1652.9124 | 0.0027  | 0       | 1.65   | 4.161 | 0.38  | 0   | 1  | 21 | 28  | 2 | 0 | 1 |
| Q5V1W2_HALMA     | 0.9791 | DTDP-glucose-4-ephydratase (EC 4.2.1.46)                                         | <i>rfbB2</i>    | rmAC1572 | 353 | 3.4  | 1 | 1 | 1      | R | HTIEWYAAKEK                     | W | 3 | 1488.7361 | 1488.7384 | 0.0023  | 0       | 1.55   | 3.628 | 0.26  | 0   | 1  | 22 | 44  | 2 | 1 | 1 |
| Q5V1Z9_HALMA     | 0.9791 | Phosphate transport system regulatory protein PhoU                               | <i>phoU2</i>    | rmAC1533 | 235 | 8.5  | 1 | 1 | 1      | R | EIDADSEAEIEQLMADVSR             | L | 2 | 2206.9899 | 2206.9942 | 0.0043  | 0       | 1.95   | 5.167 | 0.515 | 0   | 1  | 23 | 38  | 2 | 0 | 1 |
| Q5V263_HALMA     | 0.9791 | Hypothetical protein                                                             | <i>rmaC1464</i> | rmAC1464 | 278 | 10.4 | 1 | 1 | 1      | K | IDLPDSEVPSVEEVKDEISLDDEFEMVR    | R | 3 | 3348.5443 | 3348.5469 | 0.0026  | 0       | 0.77   | 4.112 | 0.397 | 0   | 1  | 36 | 112 | 2 | 1 | 1 |
| Q5V2C4_HALMA     | 0.9791 | Cytochrome c oxidase polypeptide III (EC 1.9.3.1)                                | <i>cyoC</i>     | rmAC1399 | 287 | 3.5  | 1 | 1 | 1      | R | GYYGQYSAER                      | H | 2 | 1192.5149 | 1192.5152 | 0.0003  | 0       | 0.26   | 2.853 | 0.49  | 0   | 1  | 16 | 18  | 2 | 0 | 1 |
| Q5V2G8_HALMA     | 0.9791 | Hypothetical protein                                                             | <i>rmaC1353</i> | rmAC1353 | 60  | 18.3 | 1 | 1 | 1      | R | LSWLHWPTVLK                     | G | 3 | 1378.7761 | 1379.7682 | 0.9920  | -1.0034 | -8.20  | 3.19  | 0.332 | 0   | 2  | 17 | 40  | 2 | 0 | 1 |
| Q5V2K7_HALMA     | 0.9791 | MRNA 3'-end processing factor-like                                               | <i>epf2a</i>    | rmAC1310 | 640 | 5.6  | 2 | 1 | 1      | R | DLMGLLQLDYLDVASK                | E | 2 | 1792.9281 | 1792.9308 | 0.0026  | 0       | 1.47   | 4.583 | 0.515 | 0   | 1  | 24 | 30  | 2 | 0 | 1 |
| Q5V2S8_HALMA     | 0.9791 | Peptidyl-prolyl cis-trans isomerase (EC 5.2.1.8)                                 | <i>slyD</i>     | rmAC1230 | 314 | 9.2  | 1 | 1 | 0.9974 | M | SNESETDVDEETADEEEQAEGLQKGDVVVK  | L | 3 | 3179.3749 | 3180.3850 | 1.0101  | -1.0034 | 2.13   | 3.357 | 0.398 | 0.1 | 1  | 25 | 112 | 2 | 1 | 1 |
| Q5V2T8_HALMA     | 0.9791 | Hypothetical protein                                                             | <i>rmaC1220</i> | rmAC1220 | 201 | 10   | 1 | 1 | 1      | R | NDELSTQTRVDELEDQLETR            | S | 3 | 2390.1197 | 2390.1309 | 0.0112  | 0       | 4.69   | 5.438 | 0.437 | 0   | 1  | 37 | 76  | 2 | 1 | 1 |
| Q5V317_HALMA     | 0.9791 | Hypothetical protein                                                             | <i>rmaC1130</i> | rmAC1130 | 95  | 13.7 | 1 | 1 | 1      | R | FGGQYFAELTGHHD                  | - | 3 | 1444.6371 | 1443.7582 | -0.8790 | 1       | 83.79  | 3.426 | 0.424 | 0   | 1  | 26 | 48  | 2 | 0 | 1 |
| Q5V3C6_HALMA     | 0.9791 | DTDP-glucose dehydratase (EC 4.2.1.46)                                           | <i>rffG</i>     | rmAC1011 | 333 | 4.8  | 1 | 1 | 1      | R | DDFDLHSAHVPIAIR                 | K | 3 | 1817.9424 | 1817.8692 | -0.0732 | 0       | -40.27 | 3.275 | 0.249 | 0.2 | 2  | 27 | 60  | 2 | 0 | 1 |
| Q5V3K2_HALMA     | 0.9791 | Hypothetical protein                                                             | <i>rmaC0926</i> | rmAC0926 | 291 | 9.6  | 1 | 1 | 1      | K | QLLPRPVVVAELAAEYVLERGLRDDEGLR   | I | 4 | 3119.6979 | 3119.6972 | -0.0007 | 0       | -0.23  | 4.072 | 0.266 | 0   | 1  | 45 | 162 | 2 | 1 | 1 |
| Q5V3Q4_HALMA     | 0.9791 | Transcription regulator                                                          | <i>rmaC0867</i> | rmAC0867 | 187 | 7.5  | 1 | 1 | 1      | R | EALAAALTEEEIVTR                 | Q | 2 | 1543.8093 | 1543.8142 | 0.0049  | 0       | 3.15   | 3.694 | 0.556 | 0   | 1  | 22 | 26  | 2 | 0 | 1 |
| Q5V3T7_HALMA     | 0.9791 | Enoyl-CoA hydratase (EC 4.2.1.17)                                                | <i>ech2</i>     | rmAC0833 | 285 | 8.4  | 1 | 1 | 1      | R | NALSALADALATATFESVTDSDAR        | C | 3 | 2467.1714 | 2468.1682 | 0.9967  | -1.0034 | -2.68  | 6.311 | 0.505 | 0   | 1  | 44 | 92  | 2 | 0 | 1 |
| Q5V3U5_HALMA     | 0.9791 | Hypothetical protein                                                             | <i>rmaC0823</i> | rmAC0823 | 404 | 4.5  | 1 | 1 | 1      | K | VSMLLSDMEDDGDISKLR              | V | 3 | 2022.9602 | 2022.9613 | 0.0010  | 0       | 0.51   | 3.487 | 0.321 | 0   | 1  | 29 | 68  | 2 | 1 | 1 |
| Q5V494_HALMA     | 0.9791 | Hypothetical protein                                                             | <i>rmaC0654</i> | rmAC0654 | 205 | 4.9  | 1 | 1 | 1      | G | FGWHTIQYIR                      | G | 3 | 1319.6775 | 1320.6682 | 0.9906  | -1.0034 | -9.63  | 3.563 | 0.341 | 0   | 6  | 18 | 36  | 2 | 0 | 1 |
| Q5V4S0_HALMA     | 0.9791 | Hypothetical protein                                                             | <i>rmaC0451</i> | rmAC0451 | 177 | 6.2  | 1 | 1 | 1      | K | NILQELVNLIR                     | E | 2 | 1373.7667 | 1373.7707 | 0.0040  | 0       | 2.91   | 3.61  | 0.381 | 0   | 1  | 18 | 20  | 2 | 0 | 1 |
| Q5V4U6_HALMA     | 0.9791 | Predicted glycosyltransferase                                                    | <i>gtr-2</i>    | rmAC0421 | 199 | 6.5  | 1 | 1 | 1      | R | LESLEAELGITSR                   | V | 2 | 1358.7405 | 1360.1854 | 1.4449  | -1.0034 | 324.99 | 3.544 | 0.394 | 0   | 1  | 19 | 24  | 2 | 0 | 1 |
| Q5V5J6_HALMA     | 0.9791 | Acetolactate synthase large subunit (EC 2.2.1.6)                                 | <i>ilvB1</i>    | rmAC0134 | 549 | 3.3  | 1 | 1 | 1      | R | TVHEAVQTDAPTLVEVR               | T | 2 | 1935.0061 | 1936.0254 | 1.0193  | -1.0034 | 8.26   | 5.013 | 0.517 | 0   | 1  | 21 | 34  | 2 | 0 | 1 |
| Q5V5S6_HALMA     | 0.9791 | Heme synthase                                                                    | <i>ctaB</i>     | rmAC0044 | 463 | 3    | 1 | 1 | 1      | R | TSDRIPIATHQIPVR                 | N | 3 | 1589.8638 | 1589.8632 | -0.0006 | 0       | -0.40  | 4.122 | 0.285 | 0   | 1  | 26 | 52  | 2 | 0 | 1 |
| Q5V5T9_HALMA     | 0.9791 | ABC transporter permease protein                                                 | <i>yurM</i>     | rmAC0030 | 309 | 3.6  | 1 | 1 | 1      | R | LDGASAFSIYR                     | N | 2 | 1198.5982 | 1198.5986 | 0.0004  | 0       | 0.32   | 2.951 | 0.474 | 0   | 1  | 18 | 20  | 2 | 0 | 1 |
| Q5V5Y7_HALMA     | 0.9791 | Glycine betaine transporter                                                      | <i>betL2</i>    | pNG7375  | 586 | 1.7  | 1 | 1 | 1      | R | SIFWPLLGER                      | I | 2 | 1216.6604 | 1216.6616 | 0.0012  | 0       | 0.96   | 2.951 | 0.307 | 0   | 1  | 16 | 18  | 2 | 0 | 1 |
| Q5V6G7_HALMA     | 0.9791 | Hypothetical protein                                                             | <i>pNG7179</i>  | pNG7179  | 218 | 10.6 | 1 | 1 | 1      | K | IVPTLEDALDRLETVAYPLENER         | A | 3 | 2655.3755 | 2655.3731 | -0.0024 | 0       | -0.90  | 3.759 | 0.372 | 0   | 1  | 39 | 88  | 2 | 1 | 1 |
| Q5V6R5_HALMA     | 0.9791 | Hypothetical protein                                                             | <i>pNG7069</i>  | pNG7069  | 135 | 18.5 | 1 | 1 | 1      | R | GGLPGAMGLGVGGTGGYVAGAAAK        | G | 3 | 2145.1252 | 2145.1282 | 0.0029  | 0       | 1.37   | 3.347 | 0.326 | 0   | 1  | 35 | 96  | 2 | 0 | 1 |
| Q5V6S1_HALMA     | 0.9791 | Cationic amino acid transporter                                                  | <i>catI</i>     | pNG7063  | 476 | 2.1  | 1 | 1 | 1      | R | SGGGYYFISR                      | D | 2 | 1105.5192 | 1105.5187 | -0.0006 | 0       | -0.52  | 3.156 | 0.451 | 0   | 1  | 16 | 18  | 2 | 0 | 1 |
| Q5V6U3_HALMA     | 0.9791 | Putative iron transporter permease                                               | <i>pNG7039</i>  | pNG7039  | 414 | 2.4  | 1 | 1 | 1      | K | YYTLWEIFGK                      | I | 2 | 1318.6598 | 1319.6654 | 1.0056  | -1.0034 | 1.72   | 2.979 | 0.416 | 0   | 1  | 16 | 18  | 2 | 0 | 1 |
| Q5V6V5_HALMA     | 0.9791 | Sugar ABC transporter permease protein                                           | <i>sugA</i>     | pNG7024  | 310 | 6.1  | 1 | 1 | 1      | R | VLFIFPIA VAPVSLATIGR            | I | 3 | 1967.1642 | 1967.1641 | -0.0001 | 0       | -0.07  | 5.434 | 0.565 | 0   | 1  | 42 | 72  | 2 | 0 | 1 |
| Q5V723_HALMA     | 0.9791 | Copper-transporting ATPase CopA                                                  | <i>copA1</i>    | pNG6059  | 790 | 1.6  | 1 | 1 | 1      | R | LTNLTISHVTEAR                   | R | 3 | 1453.7889 | 1453.7900 | 0.0011  | 0       | 0.74   | 3.385 | 0.364 | 0   | 1  | 23 | 48  | 2 | 0 | 1 |
| Q5V744_HALMA     | 0.9791 | Hypothetical protein                                                             | <i>pNG6084</i>  | pNG6084  | 88  | 22.7 | 1 | 1 | 1      | K | GLEHPQLDDDEEDAFLSAR             | A | 3 | 2285.0084 | 2285.0108 | 0.0024  | 0       | 1.05   | 3.732 | 0.329 | 0   | 1  | 33 | 76  | 2 | 0 | 1 |
| Q5V7W2_HALMA     | 0.9791 | Hypothetical protein                                                             | <i>pNG4035</i>  | pNG4035  | 171 | 9.4  | 1 | 1 | 1      | K | LLNENIDGNDLLDQIR                | S | 2 | 1855.8912 | 1855.8961 | 0.0049  | 0       | 2.62   | 5.166 | 0.4   | 0   | 1  | 25 | 30  | 2 | 0 | 1 |
| Q5V7X1_HALMA     | 0.9791 | Putative helicase                                                                | <i>pNG4051</i>  | pNG4051  | 893 | 2.8  | 1 | 1 | 1      | R | 2522.2136 2523.2182             | D | 3 | 2522.2136 | 2523.2182 | 1.0045  | -1.0034 | 0.47   | 4.556 | 0.448 | 0   | 1  | 34 | 96  | 2 | 0 | 1 |
| Q5V803_HALMA     | 0.9791 | Hypothetical protein                                                             | <i>pNG3042</i>  | pNG3042  | 137 | 7.3  | 1 | 1 | 1      | R | LGPLSVVLQR                      | R | 2 | 1080.6655 | 1080.6693 | 0.0038  | 0       | 3.48   | 2.864 | 0.266 | 0   | 1  | 16 | 18  | 2 | 0 | 1 |
| RS24_HALMAReview | 0.9791 | 30S ribosomal protein S24e (HS15) (E1.2)                                         | <i>rps24e</i>   | rmAC2488 | 102 | 21.6 | 1 | 1 | 1      | R | DSLAATLNKDAEEVVIHKLDTK          | F | 4 | 2409.2751 | 2409.2773 | 0.0022  | 0       | 0.90   | 3.051 | 0.286 | 0.1 | 1  | 36 | 126 | 2 | 2 | 1 |
| RS3_HALMAReview  | 0.9791 | 30S ribosomal protein S3P (HmaS3) (HS1)                                          | <i>rps3p</i>    | rmAC1605 | 304 | 4.3  | 1 | 1 | 1      | R | TQIDEFFAEELGR                   | A | 2 | 1553.7362 | 1553.7454 | 0.0092  | 0       | 5.94   | 3.198 | 0.47  | 0   | 1  | 20 | 24  | 2 | 0 | 1 |
| SYD_HALMAReview  | 0.9791 | Aspartyl-tRNA synthetase (EC 6.1.1.12) (Aspartate--tRNA ligase)(AspRS)           | <i>aspS</i>     | rmAC1657 | 434 | 2.5  | 1 | 1 | 1      | R | DLGGIAFLILR                     | D | 2 | 1186.7074 | 1186.7054 | -0.0020 | 0       | -1.67  | 3.051 | 0.339 | 0   | 1  | 19 | 20  | 2 | 0 | 1 |
| PURA_HALMAReview | 0.9770 | Adenylosuccinate synthetase (EC 6.3.4.4) (IMP--aspartate ligase)(AdSS) (AMPSase) | <i>purA</i>     | rmAC1283 | 458 | 2.2  | 1 | 1 | 0.9999 | R | VGWLDLPLMLR                     | H | 2 | 1198.6532 | 1199.6654 | 1.0122  | -1.0034 | 7.40   | 3.173 | 0.283 | 0   | 1  | 16 | 18  | 2 | 0 | 1 |
| Q5UWV9_HALMA     | 0.9770 | Hypothetical protein                                                             | <i>rmB0030</i>  | rmB0030  | 409 | 3.9  | 1 | 1 | 0.9999 | R | SQTLWLDTESLPIKR                 | Q | 3 | 1933.0309 | 1933.0338 | 0.0029  | 0       | 1.47   | 3.325 | 0.201 | 0   | 1  | 26 | 60  | 2 | 0 | 1 |
| Q5UX30_HALMA     | 0.9770 | Flavin-containing amino-oxidoreductase                                           | <i>rmaC3504</i> | rmAC3504 | 417 | 4.6  | 1 | 1 | 0.9999 | R | AALQSWYPNASFEALLELR             | T | 3 | 2178.1109 | 2179.1414 | 1.0305  | -1.0034 | 12.47  | 3.621 | 0.301 | 0   | 10 | 20 | 72  | 2 | 0 | 1 |
| Q5UX40_HALMA     | 0.9770 | Bacterio-opsin activator-like protein                                            | <i>boa2</i>     | rmAC3490 | 215 | 5.1  | 1 | 1 | 0.9999 | R | LKELPYGVSLR                     | S | 3 | 1291.7136 | 1291.7147 | 0.0010  | 0       | 0.80   | 3.276 | 0.312 | 0.2 | 93 | 18 | 40  | 2 | 1 | 1 |
| Q5UYP0_HALMA     | 0.9770 | Hypothetical protein                                                             | <i>rmaC2863</i> | rmAC2863 | 285 | 17.5 | 2 | 1 | 0.9999 | R | VNKEFDLTYNIR                    | N | 3 | 1510.7780 | 1511.7682 | 0.9901  | -1.0034 | -8.74  | 3.197 | 0.313 | 0   | 5  | 19 | 44  | 2 | 1 | 1 |
| Q5UZ72_HALMA     | 0.9770 | Ribose ABC transporter permease                                                  | <i>rbsC</i>     | rmAC2651 | 354 | 4.8  | 1 | 1 | 0.9999 | R | LSVPIVLAALGGIFAEK               | S | 3 | 1697.0127 | 1698.0175 | 1.0048  | -1.0034 | 0.86   | 3.559 | 0.227 | 0   | 1  | 32 | 64  | 2 | 0 | 1 |
| Q5UZS1_HALMA     | 0.9770 | Dethiobiotin synthesis protein                                                   | <i>bioY</i>     | rm       |     |      |   |   |        |   |                                 |   |   |           |           |         |         |        |       |       |     |    |    |     |   |   |   |
