# Supplementary material
Source: PubMed Central journal article supplement (PMC3168985)
Supplement: NIHMS304204-supplement-5_si_005.pdf [file NIHMS304204-supplement-5_si_005.pdf]

**Supplementary Table 5.** Summary of the proteins and peptides identified in tryptic digested membrane proteome (OD<sub>600</sub> = 0.7). The protein information include the Integr8 protein ID, protein identification (*ProteinProphet*) probability, protein description, gene name, locus name, protein length, percentage of protein sequence covered by MS identified peptides (% coverage), number of unique peptide identifications, and total number of identified peptides. The peptide information include the peptide identification (*PeptideProphet*) probability, N-terminus adjacent amino acid residue, matched peptide sequence, C-terminus adjacent amino acid residue, precursor charge, calculated neutral peptide mass, measured precursor neutral mass, measured and calculated peptide mass difference, mass difference adjustment, mass difference (ppm), *SEQUEST* scores (XCorr, deltcn, Sp score, Sp rank), number of matched b- and y-ions, number of theoretical b- and y- ions, number of tryptic termini, number of tryptic missed cleavages, number of matched protein, alternative matched protein ID, and modification. Listed are the peptides with an identification probability  $\geq 0.9$ .

| Protein ID   | Protein prob. | Protein description       | Gene Name | Locus name | Protein length | Percent coverage <sup>a</sup> | No. unique peptides | Total no. identified peptides | Peptide prob. | N-terminus adjacent aa | Matched peptide sequence         | C-terminus adjacent aa | Precursor charge | Calc neutral pep mass | Precursor neutral mass | Mass difference <sup>b</sup> | Mass difference adjustment <sup>c</sup> | Mass difference (ppm) | Xcorr | Deltacn | Sp score | Sp rank | No. matched ions | No. theoretical ions | Tryptic termini | No. missed cleavage | No. matched proteins | Alternative matched protein | Modification |
|--------------|---------------|---------------------------|-----------|------------|----------------|-------------------------------|---------------------|-------------------------------|---------------|------------------------|----------------------------------|------------------------|------------------|-----------------------|------------------------|------------------------------|-----------------------------------------|-----------------------|-------|---------|----------|---------|------------------|----------------------|-----------------|---------------------|----------------------|-----------------------------|--------------|
| Q5V7F4_HALMA | 1             | Cell surface glycoprotein | csgI      | pNG5138    | 887            | 52.2                          | 88                  | 1804                          | 1             | R                      | EQILANTVDDTASDDLIVNEQFR          | L                      | 2                | 2605.2507             | 2607.2654              | 2.014724                     | -2.0067                                 | 3.08                  | 4.994 | 0.492   | 0        | 1       | 20               | 44                   | 2               | 0                   | 1                    |                             |              |
| Q5V7F4_HALMA | 1             | Cell surface glycoprotein | csgI      | pNG5138    | 887            | 52.2                          | 88                  | 1804                          | 1             | D                      | ADLDSGTVDDTLTSDSFNSGVSGATALR     | V                      | 2                | 2900.3159             | 2901.3229              | 1.006926                     | -1.0034                                 | 1.23                  | 5.325 | 0.587   | 0        | 1       | 28               | 56                   | 1               | 0                   | 1                    |                             |              |
| Q5V7F4_HALMA | 1             | Cell surface glycoprotein | csgI      | pNG5138    | 887            | 52.2                          | 88                  | 1804                          | 1             | R                      | ADYNFQEAEDLEITVEDENGLEVTNIEIVVQK | T                      | 3                | 3552.6631             | 3554.6482              | 1.985047                     | -2.0067                                 | -6.09                 | 6.211 | 0.467   | 0        | 1       | 40               | 120                  | 2               | 0                   | 1                    |                             |              |
| Q5V7F4_HALMA | 1             | Cell surface glycoprotein | csgI      | pNG5138    | 887            | 52.2                          | 88                  | 1804                          | 1             | R                      | ADYNFQEAEDLEITVEDENGLEVTNIEIVVQK | T                      | 4                | 3552.6631             | 3554.6852              | 2.022126                     | -2.0067                                 | 4.34                  | 4.419 | 0.289   | 0        | 1       | 42               | 180                  | 2               | 0                   | 1                    |                             |              |
| Q5V7F4_HALMA | 1             | Cell surface glycoprotein | csgI      | pNG5138    | 887            | 52.2                          | 88                  | 1804                          | 1             | R                      | ADYNFQEAEDLEITVEDENGLEVTNIEIVVQK | T                      | 3                | 3552.6631             | 3553.6962              | 1.033112                     | -1.0034                                 | 8.38                  | 5.446 | 0.355   | 0        | 1       | 43               | 180                  | 2               | 0                   | 1                    |                             |              |
| Q5V7F4_HALMA | 1             | Cell surface glycoprotein | csgI      | pNG5138    | 887            | 52.2                          | 88                  | 1804                          | 1             | R                      | ADYNFQEAEDLEITVEDENGLEVTNIEIVVQK | T                      | 3                | 3552.6631             | 3552.6685              | 0.005355                     | 0                                       | 1.51                  | 6.288 | 0.527   | 0        | 1       | 35               | 120                  | 2               | 0                   | 1                    |                             |              |
| Q5V7F4_HALMA | 1             | Cell surface glycoprotein | csgI      | pNG5138    | 887            | 52.2                          | 88                  | 1804                          | 1             | R                      | ADYNFQEAEDLEITVEDENGLEVTNIEIVVQK | T                      | 3                | 3552.6631             | 3552.6641              | 0.00096                      | 0                                       | 0.27                  | 6.153 | 0.544   | 0        | 1       | 35               | 120                  | 2               | 0                   | 1                    |                             |              |
| Q5V7F4_HALMA | 1             | Cell surface glycoprotein | csgI      | pNG5138    | 887            | 52.2                          | 88                  | 1804                          | 1             | R                      | ADYNFQEAEDLEITVEDENGLEVTNIEIVVQK | T                      | 3                | 3552.6631             | 3552.6758              | 0.012679                     | 0                                       | 3.57                  | 4.781 | 0.433   | 0        | 1       | 32               | 120                  | 2               | 0                   | 1                    |                             |              |
| Q5V7F4_HALMA | 1             | Cell surface glycoprotein | csgI      | pNG5138    | 887            | 52.2                          | 88                  | 1804                          | 1             | R                      | ADYNFQEAEDLEITVEDENGLEVTNIEIVVQK | T                      | 4                | 3552.6631             | 3553.6586              | 0.995515                     | -1.0034                                 | -2.21                 | 5.497 | 0.385   | 0        | 1       | 45               | 180                  | 2               | 0                   | 1                    |                             |              |
| Q5V7F4_HALMA | 1             | Cell surface glycoprotein | csgI      | pNG5138    | 887            | 52.2                          | 88                  | 1804                          | 1             | R                      | ADYNFQEAEDLEITVEDENGLEVTNIEIVVQK | T                      | 3                | 3552.6631             | 3552.6732              | 0.010116                     | 0                                       | 2.85                  | 6.635 | 0.501   | 0        | 1       | 40               | 120                  | 2               | 0                   | 1                    |                             |              |
| Q5V7F4_HALMA | 1             | Cell surface glycoprotein | csgI      | pNG5138    | 887            | 52.2                          | 88                  | 1804                          | 1             | R                      | ADYNFQEAEDLEITVEDENGLEVTNIEIVVQK | T                      | 4                | 3552.6631             | 3553.6496              | 0.986481                     | -1.0034                                 | -4.75                 | 4.63  | 0.368   | 0        | 1       | 46               | 180                  | 2               | 0                   | 1                    |                             |              |
| Q5V7F4_HALMA | 1             | Cell surface glycoprotein | csgI      | pNG5138    | 887            | 52.2                          | 88                  | 1804                          | 1             | R                      | ADYNFQEAEDLEITVEDENGLEVTNIEIVVQK | T                      | 3                | 3552.6631             | 3552.674               | 0.010848                     | 0                                       | 3.05                  | 5.98  | 0.486   | 0        | 1       | 35               | 120                  | 2               | 0                   | 1                    |                             |              |
| Q5V7F4_HALMA | 1             | Cell surface glycoprotein | csgI      | pNG5138    | 887            | 52.2                          | 88                  | 1804                          | 1             | R                      | ADYNFQEAEDLEITVEDENGLEVTNIEIVVQK | T                      | 4                | 3552.6631             | 3554.6682              | 2.005036                     | -2.0067                                 | -0.47                 | 5.321 | 0.456   | 0        | 1       | 44               | 180                  | 2               | 0                   | 1                    |                             |              |
| Q5V7F4_HALMA | 1             | Cell surface glycoprotein | csgI      | pNG5138    | 887            | 52.2                          | 88                  | 1804                          | 1             | R                      | ADYNFQEAEDLEITVEDENGLEVTNIEIVVQK | T                      | 3                | 3552.6631             | 3552.6725              | 0.009383                     | 0                                       | 2.64                  | 4.423 | 0.362   | 0        | 1       | 28               | 120                  | 2               | 0                   | 1                    |                             |              |
| Q5V7F4_HALMA | 1             | Cell surface glycoprotein | csgI      | pNG5138    | 887            | 52.2                          | 88                  | 1804                          | 1             | R                      | ADYNFQEAEDLEITVEDENGLEVTNIEIVVQK | T                      | 3                | 3552.6631             | 3553.6582              | 0.995047                     | -1.0034                                 | -2.34                 | 4.424 | 0.373   | 0        | 1       | 29               | 120                  | 2               | 0                   | 1                    |                             |              |
| Q5V7F4_HALMA | 1             | Cell surface glycoprotein | csgI      | pNG5138    | 887            | 52.2                          | 88                  | 1804                          | 1             | R                      | ADYNFQEAEDLEITVEDENGLEVTNIEIVVQK | T                      | 4                | 3552.6631             | 3553.729               | 1.065827                     | -1.0034                                 | 17.59                 | 4.96  | 0.362   | 0        | 1       | 46               | 180                  | 2               | 0                   | 1                    |                             |              |
| Q5V7F4_HALMA | 1             | Cell surface glycoprotein | csgI      | pNG5138    | 887            | 52.2                          | 88                  | 1804                          | 1             | R                      | ADYNFQEAEDLEITVEDENGLEVTNIEIVVQK | T                      | 3                | 3552.6631             | 3554.6782              | 2.015047                     | -2.0067                                 | 2.35                  | 6.354 | 0.545   | 0        | 1       | 41               | 120                  | 2               | 0                   | 1                    |                             |              |
| Q5V7F4_HALMA | 1             | Cell surface glycoprotein | csgI      | pNG5138    | 887            | 52.2                          | 88                  | 1804                          | 1             | R                      | ADYNFQEAEDLEITVEDENGLEVTNIEIVVQK | T                      | 3                | 3552.6631             | 3554.6782              | 2.015047                     | -2.0067                                 | 2.35                  | 5.916 | 0.398   | 0        | 1       | 34               | 120                  | 2               | 0                   | 1                    |                             |              |
| Q5V7F4_HALMA | 1             | Cell surface glycoprotein | csgI      | pNG5138    | 887            | 52.2                          | 88                  | 1804                          | 1             | R                      | ADYNFQEAEDLEITVEDENGLEVTNIEIVVQK | T                      | 3                | 3552.6631             | 3552.6564              | -0.00673                     | 0                                       | -1.89                 | 6.458 | 0.44    | 0        | 1       | 37               | 120                  | 2               | 0                   | 1                    |                             |              |
| Q5V7F4_HALMA | 1             | Cell surface glycoprotein | csgI      | pNG5138    | 887            | 52.2                          | 88                  | 1804                          | 1             | R                      | ADYNFQEAEDLEITVEDENGLEVTNIEIVVQK | T                      | 3                | 3552.6631             | 3552.6751              | 0.011946                     | 0                                       | 3.36                  | 6.387 | 0.514   | 0        | 1       | 37               | 120                  | 2               | 0                   | 1                    |                             |              |
| Q5V7F4_HALMA | 1             | Cell surface glycoprotein | csgI      | pNG5138    | 887            | 52.2                          | 88                  | 1804                          | 1             | R                      | ADYNFQEAEDLEITVEDENGLEVTNIEIVVQK | T                      | 3                | 3552.6631             | 3552.6663              | 0.003157                     | 0                                       | 0.89                  | 5.763 | 0.483   | 0        | 1       | 33               | 120                  | 2               | 0                   | 1                    |                             |              |
| Q5V7F4_HALMA | 1             | Cell surface glycoprotein | csgI      | pNG5138    | 887            | 52.2                          | 88                  | 1804                          | 1             | R                      | ADYNFQEAEDLEITVEDENGLEVTNIEIVVQK | T                      | 3                | 3552.6631             | 3552.6696              | 0.006453                     | 0                                       | 1.82                  | 4.843 | 0.437   | 0        | 1       | 34               | 120                  | 2               | 0                   | 1                    |                             |              |
| Q5V7F4_HALMA | 1             | Cell surface glycoprotein | csgI      | pNG5138    | 887            | 52.2                          | 88                  | 1804                          | 1             | R                      | ADYNFQEAEDLEITVEDENGLEVTNIEIVVQK | T                      | 3                | 3552.6631             | 3552.6677              | 0.004622                     | 0                                       | 1.30                  | 6.575 | 0.572   | 0        | 1       | 39               | 120                  | 2               | 0                   | 1                    |                             |              |
| Q5V7F4_HALMA | 1             | Cell surface glycoprotein | csgI      | pNG5138    | 887            | 52.2                          | 88                  | 1804                          | 1             | R                      | ADYNFQEAEDLEITVEDENGLEVTNIEIVVQK | T                      | 3                | 3552.6631             | 3552.6571              | -0.005998                    | 0                                       | -1.69                 | 3.592 | 0.328   | 0        | 1       | 27               | 120                  | 2               | 0                   | 1                    |                             |              |
| Q5V7F4_HALMA | 1             | Cell surface glycoprotein | csgI      | pNG5138    | 887            | 52.2                          | 88                  | 1804                          | 1             | R                      | ADYNFQEAEDLEITVEDENGLEVTNIEIVVQK | T                      | 3                | 3552.6631             | 3552.6666              | 0.003524                     | 0                                       | 0.99                  | 5.732 | 0.538   | 0        | 1       | 38               | 120                  | 2               | 0                   | 1                    |                             |              |
| Q5V7F4_HALMA | 1             | Cell surface glycoprotein | csgI      | pNG5138    | 887            | 52.2                          | 88                  | 1804                          | 1             | R                      | ADYNFQEAEDLEITVEDENGLEVTNIEIVVQK | T                      | 3                | 3552.6631             | 3554.6482              | 1.985047                     | -2.0067                                 | -6.09                 | 4.817 | 0.43    | 0        | 1       | 30               | 120                  | 2               | 0                   | 1                    |                             |              |
| Q5V7F4_HALMA | 1             | Cell surface glycoprotein | csgI      | pNG5138    | 887            | 52.2                          | 88                  | 1804                          | 1             | R                      | ADYNFQEAEDLEITVEDENGLEVTNIEIVVQK | T                      | 3                | 3552.6631             | 3552.6725              | 0.009383                     | 0                                       | 2.64                  | 4.466 | 0.419   | 0        | 1       | 33               | 120                  | 2               | 0                   | 1                    |                             |              |
| Q5V7F4_HALMA | 1             | Cell surface glycoprotein | csgI      | pNG5138    | 887            | 52.2                          | 88                  | 1804                          | 1             | R                      | ADYNFQEAEDLEITVEDENGLEVTNIEIVVQK | T                      | 3                | 3552.6631             | 3552.6641              | 0.00096                      | 0                                       | 0.27                  | 5.89  | 0.523   | 0        | 1       | 31               | 120                  | 2               | 0                   | 1                    |                             |              |
| Q5V7F4_HALMA | 1             | Cell surface glycoprotein | csgI      | pNG5138    | 887            | 52.2                          | 88                  | 1804                          | 1             | R                      | ADYNFQEAEDLEITVEDENGLEVTNIEIVVQK | T                      | 3                | 3552.6631             | 3552.674               | 0.010848                     | 0                                       | 3.05                  | 5.195 | 0.422   | 0        | 1       | 32               | 120                  | 2               | 0                   | 1                    |                             |              |
| Q5V7F4_HALMA | 1             | Cell surface glycoprotein | csgI      | pNG5138    | 887            | 52.2                          | 88                  | 1804                          | 1             | R                      | ADYNFQEAEDLEITVEDENGLEVTNIEIVVQK | T                      | 3                | 3552.6631             | 3552.6707              | 0.007552                     | 0                                       | 2.13                  | 6.012 | 0.575   | 0        | 1       | 32               | 120                  | 2               | 0                   | 1                    |                             |              |
| Q5V7F4_HALMA | 1             | Cell surface glycoprotein | csgI      | pNG5138    | 887            | 52.2                          | 88                  | 1804                          | 1             | R                      | ADYNFQEAEDLEITVEDENGLEVTNIEIVVQK | T                      | 3                | 3552.6631             | 3552.6634              | 0.000228                     | 0                                       | 0.06                  | 6.258 | 0.446   | 0        | 1       | 37               | 120                  | 2               | 0                   | 1                    |                             |              |
| Q5V7F4_HALMA | 1             | Cell surface glycoprotein | csgI      | pNG5138    | 887            | 52.2                          | 88                  | 1804                          | 1             | R                      | ADYNFQEAEDLEITVEDENGLEVTNIEIVVQK | T                      | 3                | 3552.6631             | 3552.6725              | 0.009383                     | 0                                       | 2.64                  | 5.726 | 0.477   | 0        | 1       | 34               | 120                  | 2               | 0                   | 1                    |                             |              |
| Q5V7F4_HALMA | 1             | Cell surface glycoprotein | csgI      | pNG5138    | 887            | 52.2                          | 88                  | 1804                          | 1             | R                      | ADYNFQEAEDLEITVEDENGLEVTNIEIVVQK | T                      | 3                | 3552.6631             | 3552.6546              | -0.008561                    | 0                                       | -2.41                 | 5.685 | 0.505   | 0        | 1       | 33               | 120                  | 2               | 0                   | 1                    |                             |              |
| Q5V7F4_HALMA | 1             | Cell surface glycoprotein | csgI      | pNG5138    | 887            | 52.2                          | 88                  | 1804                          | 1             | R                      | ADYNFQEAEDLEITVEDENGLEVTNIEIVVQK | T                      | 4                | 3552.6631             | 3552.6711              | 0.007966                     | 0                                       | 2.24                  | 5.151 | 0.44    | 0        | 1       | 47               | 180                  | 2               | 0                   | 1                    |                             |              |
| Q5V7F4_HALMA | 1             | Cell surface glycoprotein | csgI      | pNG5138    | 887            | 52.2                          | 88                  | 1804                          | 1             | R                      | ADYNFQEAEDLEITVEDENGLEVTNIEIVVQK | T                      | 3                | 3552.6631             | 3552.6568              | -0.006364                    | 0                                       | -1.79                 | 4.954 | 0.34    | 0        | 1       | 29               | 120                  | 2               | 0                   | 1                    |                             |              |
| Q5V7F4_HALMA | 1             | Cell surface glycoprotein | csgI      | pNG5138    | 887            | 52.2                          | 88                  | 1804                          | 1             | R                      | ADYNFQEAEDLEITVEDENGLEVTNIEIVVQK | T                      | 3                | 3552.6631             | 3552.6601              | -0.003068                    | 0                                       | -0.86                 | 5.557 | 0.517   | 0        | 1       | 36               | 120                  | 2               | 0                   | 1                    |                             |              |
| Q5V7F4_HALMA | 1             | Cell surface glycoprotein | csgI      | pNG5138    | 887            | 52.2                          | 88                  | 1804                          | 1             | R                      | ADYNFQEAEDLEITVEDENGLEVTNIEIVVQK | T                      | 4                | 3552.6631             | 3552.6503              | -0.012786                    | 0                                       | -3.60                 | 4.984 | 0.413   | 0        | 1       | 38               | 180                  | 2               | 0                   | 1                    |                             |              |
| Q5V7F4_HALMA | 1             | Cell surface glycoprotein | csgI      | pNG5138    | 887            | 52.2                          | 88                  | 1804                          | 1             | R                      | ADYNFQEAEDLEITVEDENGLEVTNIEIVVQK | T                      | 3                | 3552.6631             | 3552.656               | -0.007097                    | 0                                       | -2.00                 | 3.645 | 0.327   | 0        | 1       | 25               | 120                  | 2               | 0                   | 1                    |                             |              |
| Q5V7F4_HALMA | 1             | Cell surface glycoprotein | csgI      | pNG5138    | 887            | 52.2                          | 88                  | 1804                          | 1             | R                      | ADYNFQEAEDLEITVEDENGLEVTNIEIVVQK | T                      | 4                | 3552.6631             | 3552.663               | -0.000091                    | 0                                       | -0.03                 | 5.907 | 0.469   | 0        | 1       | 49               | 180                  | 2               | 0                   | 1                    |                             |              |
| Q5V7F4_HALMA | 1             | Cell surface glycoprotein | csgI      | pNG5138    | 887            | 52.2                          | 88                  | 1804                          | 1             | R                      | ADYNFQEAEDLEITVEDENGLEVTNIEIVVQK | T                      | 3                | 3552.6631             | 3552.6652              | 0.002059                     | 0                                       | 0.58                  | 5.723 | 0.519   | 0        | 1       | 37               | 120                  | 2               | 0                   | 1                    |                             |              |
| Q5V7F4_HALMA | 1             | Cell surface glycoprotein | csgI      | pNG5138    | 887            | 52.2                          | 88                  | 1804                          | 1             | R                      | ADYNFQEAEDLEITVEDENGLEVTNIEIVVQK | T                      | 3                | 3552.6631             | 3552.6637              | 0.000594                     | 0                                       | 0.17                  | 6.484 | 0.529   | 0        | 1       | 42               | 120                  | 2               | 0                   | 1                    |                             |              |
| Q5V7F4_HALMA | 1             | Cell surface glycoprotein | csgI      | pNG5138    | 887            | 52.2                          | 88                  | 1804                          | 1             | R                      | ADYNFQEAEDLEITVEDENGLEVTNIEIVVQK | T                      | 3                | 3552.6631             | 3554.6782              | 2.015047                     | -2.0067                                 | 2.35                  | 6.123 | 0.528   | 0        | 1       | 37               | 120                  | 2               | 0                   | 1                    |                             |              |
| Q5V7F4_HALMA | 1             | Cell surface glycoprotein | csgI      | pNG5138    | 887            | 52.2                          | 88                  | 1804                          | 1             | R                      | ADYNFQEAEDLEITVEDENGLEVTNIEIVVQK | T                      | 3                | 3552.6631             | 3552.6883              | 0.02513                      | 0                                       | 7.07                  | 4.846 | 0.452   | 0        | 1       | 29               | 120                  | 2               | 0                   | 1                    |                             |              |
| Q5V7F4_HALMA | 1             | Cell surface glycoprotein | csgI      | pNG5138    | 887            | 52.2                          | 88                  | 1804                          | 1             | R                      | ADYNFQEAEDLEITVEDENGLEVTNIEIVVQK | T                      | 3                | 3552.6631             | 3554.6482              | 1.985047                     | -2.0067                                 | -6.09                 | 6.005 | 0.488   | 0        | 1       | 32               | 120                  | 2               | 0                   | 1                    |                             |              |
| Q5V7F4_HALMA | 1             | Cell surface glycoprotein | csgI      | pNG5138    | 887            | 52.2                          | 88                  | 1804                          | 1             | R                      | ADYNFQEAEDLEITVEDENGLEVTNIEIVVQK | T                      | 3                | 3552.6631             | 3553.6582              | 0.995047                     | -1.0034                                 | -2.34                 | 4.459 | 0.45    | 0        | 1       | 30               | 120                  | 2               | 0                   | 1                    |                             |              |
| Q5V7F4_HALMA | 1             | Cell surface glycoprotein | csgI      | pNG5138    | 887            | 52.2                          | 88                  | 1804                          | 1             | R                      | ADYNFQEAEDLEITVEDENGLEVTNIEIVVQK | T                      | 4                | 3552.6631             | 3552.6599              | -0.003265                    | 0                                       | -0.92                 |       |         |          |         |                  |                      |                 |                     |                      |                             |              |

|              |   |                           |      |         |     |      |    |      |   |   |                                 |   |   |           |           |           |         |       |       |       |     |   |    |     |   |   |   |
|--------------|---|---------------------------|------|---------|-----|------|----|------|---|---|---------------------------------|---|---|-----------|-----------|-----------|---------|-------|-------|-------|-----|---|----|-----|---|---|---|
| Q5V7F4_HALMA | 1 | Cell surface glycoprotein | csgI | pNG5138 | 887 | 52.2 | 88 | 1804 | 1 | R | ADYNFQEAEDLEITVEDENGLEVTNEIVVQK | T | 3 | 3552.6631 | 3552.667  | 0.00389   | 0       | 1.09  | 6.434 | 0.491 | 0   | 1 | 36 | 120 | 2 | 0 | 1 |
| Q5V7F4_HALMA | 1 | Cell surface glycoprotein | csgI | pNG5138 | 887 | 52.2 | 88 | 1804 | 1 | R | ADYNFQEAEDLEITVEDENGLEVTNEIVVQK | T | 3 | 3552.6631 | 3552.6718 | 0.008651  | 0       | 2.44  | 5.607 | 0.462 | 0   | 1 | 35 | 120 | 2 | 0 | 1 |
| Q5V7F4_HALMA | 1 | Cell surface glycoprotein | csgI | pNG5138 | 887 | 52.2 | 88 | 1804 | 1 | R | ADYNFQEAEDLEITVEDENGLEVTNEIVVQK | T | 3 | 3552.6631 | 3552.6663 | 0.003157  | 0       | 0.89  | 5.912 | 0.462 | 0   | 1 | 33 | 120 | 2 | 0 | 1 |
| Q5V7F4_HALMA | 1 | Cell surface glycoprotein | csgI | pNG5138 | 887 | 52.2 | 88 | 1804 | 1 | R | ADYNFQEAEDLEITVEDENGLEVTNEIVVQK | T | 3 | 3552.6631 | 3552.663  | -0.000138 | 0       | -0.04 | 6.77  | 0.539 | 0   | 1 | 38 | 120 | 2 | 0 | 1 |
| Q5V7F4_HALMA | 1 | Cell surface glycoprotein | csgI | pNG5138 | 887 | 52.2 | 88 | 1804 | 1 | R | ADYNFQEAEDLEITVEDENGLEVTNEIVVQK | T | 3 | 3552.6631 | 3552.6634 | 0.000228  | 0       | 0.06  | 6.737 | 0.561 | 0   | 1 | 36 | 120 | 2 | 0 | 1 |
| Q5V7F4_HALMA | 1 | Cell surface glycoprotein | csgI | pNG5138 | 887 | 52.2 | 88 | 1804 | 1 | R | ADYNFQEAEDLEITVEDENGLEVTNEIVVQK | T | 3 | 3552.6631 | 3552.6685 | 0.005355  | 0       | 1.51  | 5.935 | 0.492 | 0   | 1 | 32 | 120 | 2 | 0 | 1 |
| Q5V7F4_HALMA | 1 | Cell surface glycoprotein | csgI | pNG5138 | 887 | 52.2 | 88 | 1804 | 1 | R | ADYNFQEAEDLEITVEDENGLEVTNEIVVQK | T | 3 | 3552.6631 | 3552.6604 | -0.002702 | 0       | -0.76 | 3.92  | 0.325 | 0.1 | 1 | 25 | 120 | 2 | 0 | 1 |
| Q5V7F4_HALMA | 1 | Cell surface glycoprotein | csgI | pNG5138 | 887 | 52.2 | 88 | 1804 | 1 | R | ADYNFQEAEDLEITVEDENGLEVTNEIVVQK | T | 3 | 3552.6631 | 3552.6699 | 0.006819  | 0       | 1.92  | 5.556 | 0.497 | 0   | 1 | 33 | 120 | 2 | 0 | 1 |
| Q5V7F4_HALMA | 1 | Cell surface glycoprotein | csgI | pNG5138 | 887 | 52.2 | 88 | 1804 | 1 | R | ADYNFQEAEDLEITVEDENGLEVTNEIVVQK | T | 3 | 3552.6631 | 3552.6699 | 0.006819  | 0       | 1.92  | 5.698 | 0.452 | 0   | 1 | 36 | 120 | 2 | 0 | 1 |
| Q5V7F4_HALMA | 1 | Cell surface glycoprotein | csgI | pNG5138 | 887 | 52.2 | 88 | 1804 | 1 | R | ADYNFQEAEDLEITVEDENGLEVTNEIVVQK | T | 4 | 3552.6631 | 3553.6677 | 1.004548  | -1.0034 | 0.34  | 5.452 | 0.394 | 0   | 1 | 43 | 180 | 2 | 0 | 1 |
| Q5V7F4_HALMA | 1 | Cell surface glycoprotein | csgI | pNG5138 | 887 | 52.2 | 88 | 1804 | 1 | R | ADYNFQEAEDLEITVEDENGLEVTNEIVVQK | T | 4 | 3552.6631 | 3552.6843 | 0.021149  | 0       | 5.95  | 4.906 | 0.363 | 0   | 1 | 47 | 180 | 2 | 0 | 1 |
| Q5V7F4_HALMA | 1 | Cell surface glycoprotein | csgI | pNG5138 | 887 | 52.2 | 88 | 1804 | 1 | R | ADYNFQEAEDLEITVEDENGLEVTNEIVVQK | T | 3 | 3552.6631 | 3552.6623 | -0.000871 | 0       | -0.25 | 5.87  | 0.546 | 0   | 1 | 34 | 120 | 2 | 0 | 1 |
| Q5V7F4_HALMA | 1 | Cell surface glycoprotein | csgI | pNG5138 | 887 | 52.2 | 88 | 1804 | 1 | R | ADYNFQEAEDLEITVEDENGLEVTNEIVVQK | T | 3 | 3552.6631 | 3552.6718 | 0.008651  | 0       | 2.44  | 4.934 | 0.427 | 0   | 1 | 39 | 120 | 2 | 0 | 1 |
| Q5V7F4_HALMA | 1 | Cell surface glycoprotein | csgI | pNG5138 | 887 | 52.2 | 88 | 1804 | 1 | R | ADYNFQEAEDLEITVEDENGLEVTNEIVVQK | T | 3 | 3552.6631 | 3552.6666 | 0.003524  | 0       | 0.99  | 4.768 | 0.424 | 0   | 1 | 31 | 120 | 2 | 0 | 1 |
| Q5V7F4_HALMA | 1 | Cell surface glycoprotein | csgI | pNG5138 | 887 | 52.2 | 88 | 1804 | 1 | R | ADYNFQEAEDLEITVEDENGLEVTNEIVVQK | T | 3 | 3552.6631 | 3552.6634 | 0.000228  | 0       | 0.06  | 6.242 | 0.533 | 0   | 1 | 36 | 120 | 2 | 0 | 1 |
| Q5V7F4_HALMA | 1 | Cell surface glycoprotein | csgI | pNG5138 | 887 | 52.2 | 88 | 1804 | 1 | R | ADYNFQEAEDLEITVEDENGLEVTNEIVVQK | T | 3 | 3552.6631 | 3552.6769 | 0.013778  | 0       | 3.88  | 4.122 | 0.251 | 0.1 | 1 | 28 | 120 | 2 | 0 | 1 |
| Q5V7F4_HALMA | 1 | Cell surface glycoprotein | csgI | pNG5138 | 887 | 52.2 | 88 | 1804 | 1 | R | ADYNFQEAEDLEITVEDENGLEVTNEIVVQK | T | 4 | 3552.6631 | 3553.6579 | 0.994782  | -1.0034 | -2.41 | 5.758 | 0.466 | 0   | 1 | 47 | 180 | 2 | 0 | 1 |
| Q5V7F4_HALMA | 1 | Cell surface glycoprotein | csgI | pNG5138 | 887 | 52.2 | 88 | 1804 | 1 | R | ADYNFQEAEDLEITVEDENGLEVTNEIVVQK | T | 3 | 3552.6631 | 3552.6615 | -0.001603 | 0       | -0.45 | 6.252 | 0.548 | 0   | 1 | 44 | 120 | 2 | 0 | 1 |
| Q5V7F4_HALMA | 1 | Cell surface glycoprotein | csgI | pNG5138 | 887 | 52.2 | 88 | 1804 | 1 | R | ADYNFQEAEDLEITVEDENGLEVTNEIVVQK | T | 3 | 3552.6631 | 3552.6626 | -0.000505 | 0       | -0.14 | 4.032 | 0.335 | 0   | 1 | 25 | 120 | 2 | 0 | 1 |
| Q5V7F4_HALMA | 1 | Cell surface glycoprotein | csgI | pNG5138 | 887 | 52.2 | 88 | 1804 | 1 | R | ADYNFQEAEDLEITVEDENGLEVTNEIVVQK | T | 3 | 3552.6631 | 3552.6692 | 0.006087  | 0       | 1.71  | 5.873 | 0.505 | 0   | 1 | 36 | 120 | 2 | 0 | 1 |
| Q5V7F4_HALMA | 1 | Cell surface glycoprotein | csgI | pNG5138 | 887 | 52.2 | 88 | 1804 | 1 | R | ADYNFQEAEDLEITVEDENGLEVTNEIVVQK | T | 4 | 3552.6631 | 3554.6708 | 2.007722  | -2.0067 | 0.29  | 5.536 | 0.357 | 0   | 1 | 49 | 180 | 2 | 0 | 1 |
| Q5V7F4_HALMA | 1 | Cell surface glycoprotein | csgI | pNG5138 | 887 | 52.2 | 88 | 1804 | 1 | R | ADYNFQEAEDLEITVEDENGLEVTNEIVVQK | T | 3 | 3552.6631 | 3552.663  | -0.000138 | 0       | -0.04 | 4.341 | 0.383 | 0   | 1 | 31 | 120 | 2 | 0 | 1 |
| Q5V7F4_HALMA | 1 | Cell surface glycoprotein | csgI | pNG5138 | 887 | 52.2 | 88 | 1804 | 1 | R | ADYNFQEAEDLEITVEDENGLEVTNEIVVQK | T | 3 | 3552.6631 | 3552.6677 | 0.004622  | 0       | 1.30  | 7.358 | 0.539 | 0   | 1 | 40 | 120 | 2 | 0 | 1 |
| Q5V7F4_HALMA | 1 | Cell surface glycoprotein | csgI | pNG5138 | 887 | 52.2 | 88 | 1804 | 1 | R | ADYNFQEAEDLEITVEDENGLEVTNEIVVQK | T | 4 | 3552.6631 | 3553.645  | 0.981843  | -1.0034 | -6.05 | 4.559 | 0.42  | 0   | 1 | 45 | 180 | 2 | 0 | 1 |
| Q5V7F4_HALMA | 1 | Cell surface glycoprotein | csgI | pNG5138 | 887 | 52.2 | 88 | 1804 | 1 | R | ADYNFQEAEDLEITVEDENGLEVTNEIVVQK | T | 3 | 3552.6631 | 3552.6652 | 0.002059  | 0       | 0.58  | 4.997 | 0.469 | 0   | 1 | 34 | 120 | 2 | 0 | 1 |
| Q5V7F4_HALMA | 1 | Cell surface glycoprotein | csgI | pNG5138 | 887 | 52.2 | 88 | 1804 | 1 | R | ADYNFQEAEDLEITVEDENGLEVTNEIVVQK | T | 3 | 3552.6631 | 3552.6593 | -0.003801 | 0       | -1.07 | 5.854 | 0.557 | 0   | 1 | 38 | 120 | 2 | 0 | 1 |
| Q5V7F4_HALMA | 1 | Cell surface glycoprotein | csgI | pNG5138 | 887 | 52.2 | 88 | 1804 | 1 | R | ADYNFQEAEDLEITVEDENGLEVTNEIVVQK | T | 4 | 3552.6631 | 3553.6564 | 0.993317  | -1.0034 | -2.82 | 5.02  | 0.432 | 0   | 1 | 45 | 180 | 2 | 0 | 1 |
| Q5V7F4_HALMA | 1 | Cell surface glycoprotein | csgI | pNG5138 | 887 | 52.2 | 88 | 1804 | 1 | R | ADYNFQEAEDLEITVEDENGLEVTNEIVVQK | T | 4 | 3552.6631 | 3554.6552 | 1.992097  | -2.0067 | -4.11 | 4.149 | 0.301 | 0   | 1 | 39 | 180 | 2 | 0 | 1 |
| Q5V7F4_HALMA | 1 | Cell surface glycoprotein | csgI | pNG5138 | 887 | 52.2 | 88 | 1804 | 1 | R | ADYNFQEAEDLEITVEDENGLEVTNEIVVQK | T | 3 | 3552.6631 | 3552.6538 | -0.009294 | 0       | -2.62 | 5.172 | 0.438 | 0   | 1 | 34 | 120 | 2 | 0 | 1 |
| Q5V7F4_HALMA | 1 | Cell surface glycoprotein | csgI | pNG5138 | 887 | 52.2 | 88 | 1804 | 1 | R | ADYNFQEAEDLEITVEDENGLEVTNEIVVQK | T | 3 | 3552.6631 | 3552.674  | 0.010848  | 0       | 3.05  | 5.391 | 0.567 | 0   | 1 | 35 | 120 | 2 | 0 | 1 |
| Q5V7F4_HALMA | 1 | Cell surface glycoprotein | csgI | pNG5138 | 887 | 52.2 | 88 | 1804 | 1 | R | ADYNFQEAEDLEITVEDENGLEVTNEIVVQK | T | 3 | 3552.6631 | 3552.6681 | 0.004989  | 0       | 1.40  | 5.034 | 0.489 | 0   | 1 | 32 | 120 | 2 | 0 | 1 |
| Q5V7F4_HALMA | 1 | Cell surface glycoprotein | csgI | pNG5138 | 887 | 52.2 | 88 | 1804 | 1 | R | ADYNFQEAEDLEITVEDENGLEVTNEIVVQK | T | 3 | 3552.6631 | 3552.6634 | 0.000228  | 0       | 0.06  | 6.503 | 0.577 | 0   | 1 | 35 | 120 | 2 | 0 | 1 |
| Q5V7F4_HALMA | 1 | Cell surface glycoprotein | csgI | pNG5138 | 887 | 52.2 | 88 | 1804 | 1 | R | ADYNFQEAEDLEITVEDENGLEVTNEIVVQK | T | 3 | 3552.6631 | 3552.6685 | 0.005355  | 0       | 1.51  | 3.871 | 0.297 | 0   | 2 | 25 | 120 | 2 | 0 | 1 |
| Q5V7F4_HALMA | 1 | Cell surface glycoprotein | csgI | pNG5138 | 887 | 52.2 | 88 | 1804 | 1 | R | ADYNFQEAEDLEITVEDENGLEVTNEIVVQK | T | 3 | 3552.6631 | 3552.6659 | 0.002791  | 0       | 0.79  | 5.961 | 0.529 | 0   | 1 | 36 | 120 | 2 | 0 | 1 |
| Q5V7F4_HALMA | 1 | Cell surface glycoprotein | csgI | pNG5138 | 887 | 52.2 | 88 | 1804 | 1 | R | ADYNFQEAEDLEITVEDENGLEVTNEIVVQK | T | 3 | 3552.6631 | 3552.667  | 0.00389   | 0       | 1.09  | 6.634 | 0.561 | 0   | 1 | 38 | 120 | 2 | 0 | 1 |
| Q5V7F4_HALMA | 1 | Cell surface glycoprotein | csgI | pNG5138 | 887 | 52.2 | 88 | 1804 | 1 | R | ADYNFQEAEDLEITVEDENGLEVTNEIVVQK | T | 4 | 3552.6631 | 3553.6684 | 1.00528   | -1.0034 | 0.54  | 4.43  | 0.309 | 0   | 1 | 44 | 180 | 2 | 0 | 1 |
| Q5V7F4_HALMA | 1 | Cell surface glycoprotein | csgI | pNG5138 | 887 | 52.2 | 88 | 1804 | 1 | R | ADYNFQEAEDLEITVEDENGLEVTNEIVVQK | T | 3 | 3552.6631 | 3552.6696 | 0.006453  | 0       | 1.82  | 5.243 | 0.416 | 0   | 1 | 30 | 120 | 2 | 0 | 1 |
| Q5V7F4_HALMA | 1 | Cell surface glycoprotein | csgI | pNG5138 | 887 | 52.2 | 88 | 1804 | 1 | R | ADYNFQEAEDLEITVEDENGLEVTNEIVVQK | T | 3 | 3552.6631 | 3553.6582 | 0.995047  | -1.0034 | -2.34 | 4.703 | 0.46  | 0   | 1 | 30 | 120 | 2 | 0 | 1 |
| Q5V7F4_HALMA | 1 | Cell surface glycoprotein | csgI | pNG5138 | 887 | 52.2 | 88 | 1804 | 1 | R | ADYNFQEAEDLEITVEDENGLEVTNEIVVQK | T | 3 | 3552.6631 | 3552.6707 | 0.007552  | 0       | 2.13  | 5.632 | 0.55  | 0   | 1 | 34 | 120 | 2 | 0 | 1 |
| Q5V7F4_HALMA | 1 | Cell surface glycoprotein | csgI | pNG5138 | 887 | 52.2 | 88 | 1804 | 1 | R | ADYNFQEAEDLEITVEDENGLEVTNEIVVQK | T | 3 | 3552.6631 | 3554.6782 | 2.015047  | -2.0067 | 2.35  | 4.691 | 0.374 | 0   | 1 | 31 | 120 | 2 | 0 | 1 |
| Q5V7F4_HALMA | 1 | Cell surface glycoprotein | csgI | pNG5138 | 887 | 52.2 | 88 | 1804 | 1 | R | ADYNFQEAEDLEITVEDENGLEVTNEIVVQK | T | 2 | 3552.6631 | 3553.6617 | 0.998593  | -1.0034 | -1.34 | 2.996 | 0.496 | 0   | 1 | 15 | 60  | 2 | 0 | 1 |
| Q5V7F4_HALMA | 1 | Cell surface glycoprotein | csgI | pNG5138 | 887 | 52.2 | 88 | 1804 | 1 | R | ADYNFQEAEDLEITVEDENGLEVTNEIVVQK | T | 3 | 3552.6631 | 3552.6604 | -0.002702 | 0       | -0.76 | 5.965 | 0.568 | 0   | 1 | 36 | 120 | 2 | 0 | 1 |
| Q5V7F4_HALMA | 1 | Cell surface glycoprotein | csgI | pNG5138 | 887 | 52.2 | 88 | 1804 | 1 | R | ADYNFQEAEDLEITVEDENGLEVTNEIVVQK | T | 3 | 3552.6631 | 3552.6769 | 0.013778  | 0       | 3.88  | 5.744 | 0.512 | 0   | 1 | 38 | 120 | 2 | 0 | 1 |
| Q5V7F4_HALMA | 1 | Cell surface glycoprotein | csgI | pNG5138 | 887 | 52.2 | 88 | 1804 | 1 | R | ADYNFQEAEDLEITVEDENGLEVTNEIVVQK | T | 3 | 3552.6631 | 3552.6762 | 0.013045  | 0       | 3.67  | 5.637 | 0.418 | 0   | 1 | 38 | 120 | 2 | 0 | 1 |
| Q5V7F4_HALMA | 1 | Cell surface glycoprotein | csgI | pNG5138 | 887 | 52.2 | 88 | 1804 | 1 | R | ADYNFQEAEDLEITVEDENGLEVTNEIVVQK | T | 4 | 3552.6631 | 3552.674  | 0.010896  | 0       | 3.07  | 6.144 | 0.493 | 0   | 1 | 50 | 180 | 2 | 0 | 1 |
| Q5V7F4_HALMA | 1 | Cell surface glycoprotein | csgI | pNG5138 | 887 | 52.2 | 88 | 1804 | 1 | R | ADYNFQEAEDLEITVEDENGLEVTNEIVVQK | T | 3 | 3552.6631 | 3552.663  | -0.000138 | 0       | -0.04 | 5.604 | 0.397 | 0   | 1 | 35 | 120 | 2 | 0 | 1 |
| Q5V7F4_HALMA | 1 | Cell surface glycoprotein | csgI | pNG5138 | 887 | 52.2 | 88 | 1804 | 1 | R | ADYNFQEAEDLEITVEDENGLEVTNEIVVQK | T | 3 | 3552.6631 | 3552.6696 | 0.006453  | 0       | 1.82  | 5.739 | 0.546 | 0   | 1 | 40 | 120 | 2 | 0 | 1 |
| Q5V7F4_HALMA | 1 | Cell surface glycoprotein | csgI | pNG5138 | 887 | 52.2 | 88 | 1804 | 1 | R | ADYNFQEAEDLEITVEDENGLEVTNEIVVQK | T | 4 | 3552.6631 | 3553.6555 | 0.992341  | -1.0034 | -3.10 | 4.448 | 0.323 | 0.1 | 1 | 38 | 180 | 2 | 0 | 1 |
| Q5V7F4_HALMA | 1 | Cell surface glycoprotein | csgI | pNG5138 | 887 | 52.2 | 88 | 1804 | 1 | R | ADYNFQEAEDLEITVEDENGLEVTNEIVVQK | T | 4 | 3552.6631 | 3553.6774 | 1.014313  | -1.0034 | 3.09  | 5.686 | 0.344 | 0   | 1 | 44 | 180 | 2 | 0 | 1 |
| Q5V7F4_HALMA | 1 | Cell surface glycoprotein | csgI | pNG5138 | 887 | 52.2 | 88 | 1804 | 1 | R | ADYNFQEAEDLEITVEDENGLEVTNEIVVQK | T | 3 | 3552.6631 | 3552.6571 | -0.005    |         |       |       |       |     |   |    |     |   |   |   |































|              |   |                      |           |           |     |      |    |      |        |   |                                   |   |   |           |           |           |         |       |       |       |     |   |    |     |   |   |   |
|--------------|---|----------------------|-----------|-----------|-----|------|----|------|--------|---|-----------------------------------|---|---|-----------|-----------|-----------|---------|-------|-------|-------|-----|---|----|-----|---|---|---|
| Q5VIB0_HALMA | 1 | Hypothetical protein | rmACI1803 | rmACI1803 | 396 | 87.9 | 68 | 1412 | 1      | R | AVIDKGMETLAEIGQGESTK              | F | 2 | 2076.0409 | 2076.0379 | -0.002986 | 0       | -1.44 | 6.473 | 0.62  | 0   | 1 | 30 | 38  | 2 | 1 | 1 |
| Q5VIB0_HALMA | 1 | Hypothetical protein | rmACI1803 | rmACI1803 | 396 | 87.9 | 68 | 1412 | 1      | R | AVIDKGMETLAEIGQGESTK              | F | 3 | 2076.0409 | 2076.041  | 0.000052  | 0       | 0.03  | 4.199 | 0.478 | 0   | 1 | 32 | 76  | 2 | 1 | 1 |
| Q5VIB0_HALMA | 1 | Hypothetical protein | rmACI1803 | rmACI1803 | 396 | 87.9 | 68 | 1412 | 0.9986 | R | AVIDKGMETLAEIGQGESTK              | F | 2 | 2076.0409 | 2076.0416 | 0.000076  | 0       | 0.33  | 3.258 | 0.216 | 0.2 | 1 | 21 | 38  | 2 | 1 | 1 |
| Q5VIB0_HALMA | 1 | Hypothetical protein | rmACI1803 | rmACI1803 | 396 | 87.9 | 68 | 1412 | 0.9966 | R | AVIDKGMETLAEIGQGESTK              | F | 4 | 2076.0409 | 2076.0358 | -0.005088 | 0       | -2.45 | 4.073 | 0.103 | 0.5 | 4 | 34 | 114 | 2 | 1 | 1 |
| Q5VIB0_HALMA | 1 | Hypothetical protein | rmACI1803 | rmACI1803 | 396 | 87.9 | 68 | 1412 | 1      | R | AVIDKGMETLAEIGQGESTKFILPQELTSLVGR | F | 4 | 3529.8702 | 3531.8909 | 2.020671  | -2.0067 | 3.96  | 4.179 | 0.381 | 0   | 1 | 44 | 192 | 2 | 2 | 1 |
| Q5VIB0_HALMA | 1 | Hypothetical protein | rmACI1803 | rmACI1803 | 396 | 87.9 | 68 | 1412 | 1      | R | AVIDKGMETLAEIGQGESTKFILPQELTSLVGR | Y | 3 | 3529.8702 | 3530.8683 | 0.998084  | -1.0034 | -1.49 | 8.617 | 0.605 | 0   | 1 | 44 | 128 | 2 | 2 | 1 |
| Q5VIB0_HALMA | 1 | Hypothetical protein | rmACI1803 | rmACI1803 | 396 | 87.9 | 68 | 1412 | 1      | R | AVIDKGMETLAEIGQGESTKFILPQELTSLVGR | Y | 3 | 3545.8702 | 3545.8621 | -0.008142 | 0       | -2.30 | 8.662 | 0.618 | 0   | 1 | 44 | 128 | 2 | 2 | 1 |
| Q5VIB0_HALMA | 1 | Hypothetical protein | rmACI1803 | rmACI1803 | 396 | 87.9 | 68 | 1412 | 1      | R | AVIDKGMETLAEIGQGESTKFILPQELTSLVGR | Y | 4 | 3529.8702 | 3529.8747 | 0.004479  | 0       | 1.27  | 4.155 | 0.332 | 0.1 | 7 | 39 | 192 | 2 | 2 | 1 |
| Q5VIB0_HALMA | 1 | Hypothetical protein | rmACI1803 | rmACI1803 | 396 | 87.9 | 68 | 1412 | 1      | R | AVIDKGMETLAEIGQGESTKFILPQELTSLVGR | Y | 3 | 3529.8702 | 3529.8667 | -0.003503 | 0       | -0.99 | 5.378 | 0.314 | 0   | 1 | 34 | 128 | 2 | 2 | 1 |
| Q5VIB0_HALMA | 1 | Hypothetical protein | rmACI1803 | rmACI1803 | 396 | 87.9 | 68 | 1412 | 1      | R | AVIDKGMETLAEIGQGESTKFILPQELTSLVGR | Y | 3 | 3529.8702 | 3530.8582 | 0.987947  | -1.0034 | -4.36 | 5.813 | 0.574 | 0   | 1 | 35 | 128 | 2 | 2 | 1 |
| Q5VIB0_HALMA | 1 | Hypothetical protein | rmACI1803 | rmACI1803 | 396 | 87.9 | 68 | 1412 | 1      | R | AVIDKGMETLAEIGQGESTKFILPQELTSLVGR | Y | 4 | 3529.8702 | 3531.8909 | 2.020671  | -2.0067 | 3.96  | 3.99  | 0.33  | 0   | 1 | 45 | 192 | 2 | 2 | 1 |
| Q5VIB0_HALMA | 1 | Hypothetical protein | rmACI1803 | rmACI1803 | 396 | 87.9 | 68 | 1412 | 1      | R | AVIDKGMETLAEIGQGESTKFILPQELTSLVGR | Y | 4 | 3529.8702 | 3529.8749 | 0.004723  | 0       | 1.34  | 3.801 | 0.285 | 0.3 | 2 | 41 | 192 | 2 | 2 | 1 |
| Q5VIB0_HALMA | 1 | Hypothetical protein | rmACI1803 | rmACI1803 | 396 | 87.9 | 68 | 1412 | 1      | R | AVIDKGMETLAEIGQGESTKFILPQELTSLVGR | Y | 3 | 3545.8702 | 3545.8668 | -0.003381 | 0       | -0.95 | 8.83  | 0.636 | 0   | 1 | 40 | 128 | 2 | 2 | 1 |
| Q5VIB0_HALMA | 1 | Hypothetical protein | rmACI1803 | rmACI1803 | 396 | 87.9 | 68 | 1412 | 1      | R | AVIDKGMETLAEIGQGESTKFILPQELTSLVGR | Y | 5 | 3529.8702 | 3529.8623 | -0.007924 | 0       | -2.24 | 4.066 | 0.311 | 0.1 | 1 | 60 | 256 | 2 | 2 | 1 |
| Q5VIB0_HALMA | 1 | Hypothetical protein | rmACI1803 | rmACI1803 | 396 | 87.9 | 68 | 1412 | 1      | R | AVIDKGMETLAEIGQGESTKFILPQELTSLVGR | Y | 3 | 3529.8702 | 3530.8582 | 0.987947  | -1.0034 | -4.36 | 3.527 | 0.354 | 0   | 1 | 30 | 128 | 2 | 2 | 1 |
| Q5VIB0_HALMA | 1 | Hypothetical protein | rmACI1803 | rmACI1803 | 396 | 87.9 | 68 | 1412 | 1      | R | AVIDKGMETLAEIGQGESTKFILPQELTSLVGR | Y | 3 | 3529.8702 | 3529.8733 | 0.003089  | 0       | 0.88  | 8.548 | 0.605 | 0   | 1 | 46 | 128 | 2 | 2 | 1 |





|              |   |                      |           |           |     |      |    |      |        |   |                       |   |   |           |           |           |   |        |       |       |     |    |    |     |   |   |   |
|--------------|---|----------------------|-----------|-----------|-----|------|----|------|--------|---|-----------------------|---|---|-----------|-----------|-----------|---|--------|-------|-------|-----|----|----|-----|---|---|---|
| Q5VIB0_HALMA | 1 | Hypothetical protein | rmACI1803 | rmACI1803 | 396 | 87.9 | 68 | 1412 | 1      | R | EVNPSKDVQQAMEQQTSAER  | K | 3 | 2274.0546 | 2274.0518 | -0.002845 | 0 | -1.25  | 4.725 | 0.441 | 0   | 1  | 34 | 76  | 2 | 1 | 1 |
| Q5VIB0_HALMA | 1 | Hypothetical protein | rmACI1803 | rmACI1803 | 396 | 87.9 | 68 | 1412 | 1      | R | EVNPSKDVQQAMEQQTSAER  | K | 3 | 2274.0546 | 2274.0546 | 0.000268  | 0 | 0.12   | 5.233 | 0.414 | 0   | 1  | 34 | 76  | 2 | 1 | 1 |
| Q5VIB0_HALMA | 1 | Hypothetical protein | rmACI1803 | rmACI1803 | 396 | 87.9 | 68 | 1412 | 0.9905 | R | EVNPSKDVQQAMEQQTSAER  | K | 2 | 2274.0546 | 2274.0523 | -0.002282 | 0 | -1.00  | 3.254 | 0.105 | 0.4 | 1  | 14 | 38  | 2 | 1 | 1 |
| Q5VIB0_HALMA | 1 | Hypothetical protein | rmACI1803 | rmACI1803 | 396 | 87.9 | 68 | 1412 | 0.98   | R | EVNPSKDVQQAMEQQTSAER  | K | 2 | 2290.0546 | 2290.0575 | 0.002845  | 0 | 1.24   | 2.204 | 0.228 | 0.4 | 1  | 15 | 38  | 2 | 1 | 1 |
| Q5VIB0_HALMA | 1 | Hypothetical protein | rmACI1803 | rmACI1803 | 396 | 87.9 | 68 | 1412 | 0.9764 | R | EVNPSKDVQQAMEQQTSAER  | K | 3 | 2290.0546 | 2288.0709 | -1.983741 | 2 | 7.10   | 3.579 | 0.237 | 0.1 | 1  | 26 | 76  | 2 | 1 | 1 |
| Q5VIB0_HALMA | 1 | Hypothetical protein | rmACI1803 | rmACI1803 | 396 | 87.9 | 68 | 1412 | 1      | R | EVNPSKDVQQAMEQQTSAERK | R | 4 | 2402.1496 | 2402.1433 | -0.006366 | 0 | -2.65  | 3.229 | 0.274 | 0.1 | 1  | 36 | 120 | 2 | 1 | 1 |
| Q5VIB0_HALMA | 1 | Hypothetical protein | rmACI1803 | rmACI1803 | 396 | 87.9 | 68 | 1412 | 1      | R | EVNPSKDVQQAMEQQTSAERK | R | 3 | 2402.1496 | 2402.1496 | -0.000005 | 0 | 0.00   | 4.834 | 0.486 | 0   | 1  | 33 | 80  | 2 | 1 | 1 |
| Q5VIB0_HALMA | 1 | Hypothetical protein | rmACI1803 | rmACI1803 | 396 | 87.9 | 68 | 1412 | 1      | R | EVNPSKDVQQAMEQQTSAERK | R | 3 | 2402.1496 | 2402.1504 | 0.000727  | 0 | 0.30   | 4.055 | 0.45  | 0   | 1  | 32 | 80  | 2 | 1 | 1 |
| Q5VIB0_HALMA | 1 | Hypothetical protein | rmACI1803 | rmACI1803 | 396 | 87.9 | 68 | 1412 | 1      | R | EVNPSKDVQQAMEQQTSAERK | R | 3 | 2402.1496 | 2402.1476 | -0.002019 | 0 | -0.84  | 5.366 | 0.49  | 0   | 1  | 28 | 80  | 2 | 1 | 1 |
| Q5VIB0_HALMA | 1 | Hypothetical protein | rmACI1803 | rmACI1803 | 396 | 87.9 | 68 | 1412 | 1      | R | EVNPSKDVQQAMEQQTSAERK | R | 3 | 2418.1496 | 2417.4982 | -0.651453 | 1 | 144.14 | 3.599 | 0.403 | 0   | 61 | 19 | 80  | 2 | 1 | 1 |
| Q5VIB0_HALMA | 1 | Hypothetical protein | rmACI1803 | rmACI1803 | 396 | 87.9 | 68 | 1412 | 1      | R | EVNPSKDVQQAMEQQTSAERK | R | 3 | 2402.1496 | 2402.1423 | -0.007329 | 0 | -3.05  | 4.127 | 0.505 | 0   | 2  | 24 | 80  | 2 | 1 | 1 |
| Q5VIB0_HALMA | 1 | Hypothetical protein | rmACI1803 | rmACI1803 | 396 | 87.9 | 68 | 1412 | 0.999  | R | EVNPSKDVQQAMEQQTSAERK | R | 4 | 2402.1496 | 2402.1477 | -0.001972 | 0 | -0.82  | 3.299 | 0.222 | 0.5 | 18 | 34 | 120 | 2 | 1 | 1 |
| Q5VIB0_HALMA | 1 | Hypothetical protein | rmACI1803 | rmACI1803 | 396 | 87.9 | 68 | 1412 | 0.9983 | R | EVNPSKDVQQAMEQQTSAERK | R | 4 | 2402.1496 | 2402.1452 | -0.004413 | 0 | -1.84  | 3.078 | 0.206 | 0.3 | 20 | 32 | 120 | 2 | 1 | 1 |
| Q5VIB0_HALMA | 1 | Hypothetical protein | rmACI1803 | rmACI1803 | 396 | 87.9 | 68 | 1412 | 0.947  | R | EVNPSKDVQQAMEQQTSAERK | R | 3 | 2418.1496 | 2418.1408 | -0.008855 | 0 | -3.66  | 2.939 | 0.11  | 0.4 | 5  | 23 | 80  | 2 | 1 | 1 |
| Q5VIB0_HALMA | 1 | Hypothetical protein | rmACI1803 | rmACI1803 | 396 | 87.9 | 68 | 1412 | 1      | K | FILPQELTSLVGR         | Y | 2 | 1471.8398 | 1471.8437 | 0.0039    | 0 | 2.65   | 3.956 | 0.177 | 0.2 | 1  | 21 | 24  | 2 | 0 | 1 |
| Q5VIB0_HALMA | 1 | Hypothetical protein | rmACI1803 | rmACI1803 | 396 | 87.9 | 68 | 1412 | 1      | K | FILPQELTSLVGR         | Y | 3 | 1471.8398 | 1471.8374 | -0.0024   | 0 | -1.63  | 3.514 | 0.367 | 0   | 1  | 30 | 48  | 2 | 0 | 1 |
| Q5VIB0_HALMA | 1 | Hypothetical protein | rmACI1803 | rmACI1803 | 396 | 87.9 | 68 | 1412 | 1      | K | FILPQELTSLVGR         |   |   |           |           |           |   |        |       |       |     |    |    |     |   |   |   |



[illegible]

[illegible]



















|              |   |                      |          |          |     |      |    |     |   |   |                      |   |   |           |           |           |   |       |       |       |   |   |    |    |   |   |   |
|--------------|---|----------------------|----------|----------|-----|------|----|-----|---|---|----------------------|---|---|-----------|-----------|-----------|---|-------|-------|-------|---|---|----|----|---|---|---|
| QSUY43_HALMA | 1 | Hypothetical protein | rmAC3098 | rmAC3098 | 357 | 68.6 | 44 | 951 | 1 | R | SGNVVTVGDTNVFTQEFLYR | A | 2 | 2245.1015 | 2245.1183 | 0.016736  | 0 | 7.45  | 5.742 | 0.604 | 0 | 1 | 28 | 38 | 2 | 0 | 1 |
| QSUY43_HALMA | 1 | Hypothetical protein | rmAC3098 | rmAC3098 | 357 | 68.6 | 44 | 951 | 1 | R | SGNVVTVGDTNVFTQEFLYR | A | 2 | 2245.1015 | 2245.0997 | -0.001819 | 0 | -0.81 | 6.389 | 0.643 | 0 | 1 | 28 | 38 | 2 | 0 | 1 |
| QSUY43_HALMA | 1 | Hypothetical protein | rmAC3098 | rmAC3098 | 357 | 68.6 | 44 | 951 | 1 | R | SGNVVTVGDTNVFTQEFLYR | A | 2 | 2245.1015 | 2245.1058 | 0.004285  | 0 | 1.91  | 6.395 | 0.631 | 0 | 1 | 29 | 38 | 2 | 0 | 1 |
| QSUY43_HALMA | 1 | Hypothetical protein | rmAC3098 | rmAC3098 | 357 | 68.6 | 44 | 951 | 1 | R | SGNVVTVGDTNVFTQEFLYR | A | 2 | 2245.1015 | 2245.1053 | 0.003797  | 0 | 1.69  | 4.967 | 0.634 | 0 | 1 | 22 | 38 | 2 | 0 | 1 |
| QSUY43_HALMA | 1 | Hypothetical protein | rmAC3098 | rmAC3098 | 357 | 68.6 | 44 | 951 | 1 | R | SGNVVTVGDTNVFTQEFLYR | A | 2 | 2245.1015 | 2245.1087 | 0.007215  | 0 | 3.21  | 6.261 | 0.648 | 0 | 1 | 28 | 38 | 2 | 0 | 1 |
| QSUY43_HALMA | 1 | Hypothetical protein | rmAC3098 | rmAC3098 | 357 | 68.6 | 44 | 951 | 1 | R | SGNVVTVGDTNVFTQEFLYR | A | 2 | 2245.1015 | 2245.1021 | 0.000623  | 0 | 0.28  | 6.591 | 0.645 | 0 | 1 | 29 | 38 | 2 | 0 | 1 |
| QSUY43_HALMA | 1 | Hypothetical protein | rmAC3098 | rmAC3098 | 357 | 68.6 | 44 | 951 | 1 | R | SGNVVTVGDTNVFTQEFLYR | A | 2 | 2245.1015 | 2245.1046 | 0.003064  | 0 | 1.36  | 5.088 | 0.644 | 0 | 1 | 27 | 38 | 2 | 0 | 1 |
| QSUY43_HALMA | 1 | Hypothetical protein | rmAC3098 | rmAC3098 | 357 | 68.6 | 44 | 951 | 1 | R | SGNVVTVGDTNVFTQEFLYR | A | 2 | 2245.1015 | 2245.1054 | 0.003924  | 0 | 1.75  | 5.4   | 0.624 | 0 | 1 | 28 | 38 | 2 | 0 | 1 |
| QSUY43_HALMA | 1 | Hypothetical protein | rmAC3098 | rmAC3098 | 357 | 68.6 | 44 | 951 | 1 | R | SGNVVTVGDTNVFTQEFLYR | A | 2 | 2245.1015 | 2245.1095 | 0.007947  | 0 | 3.54  | 6.261 | 0.588 | 0 | 1 | 28 | 38 | 2 | 0 | 1 |
| QSUY43_HALMA | 1 | Hypothetical protein | rmAC3098 | rmAC3098 | 357 | 68.6 | 44 | 951 | 1 | R | SGNVVTVGDTNVFTQEFLYR | A | 2 | 2245.1015 | 2245.1    | -0.001574 | 0 | -0.70 | 5.92  | 0.591 | 0 | 1 | 26 | 38 | 2 | 0 | 1 |
| QSUY43_HALMA | 1 | Hypothetical protein | rmAC3098 | rmAC3098 | 357 | 68.6 | 44 | 951 | 1 | R | SGNVVTVGDTNVFTQEFLYR | A | 2 | 2245.1015 | 2245.1053 | 0.003797  | 0 | 1.69  | 6.577 | 0.607 | 0 | 1 | 29 | 38 | 2 | 0 | 1 |
| QSUY43_HALMA | 1 | Hypothetical protein | rmAC3098 | rmAC3098 | 357 | 68.6 | 44 | 951 | 1 | R | SGNVVTVGDTNVFTQEFLYR | A | 2 | 2245.1015 | 2245.1061 | 0.004529  | 0 | 2.02  | 5.768 | 0.586 | 0 | 1 | 27 | 38 | 2 | 0 | 1 |
| QSUY43_HALMA | 1 | Hypothetical protein | rmAC3098 | rmAC3098 | 357 | 68.6 | 44 | 951 | 1 | R | SGNVVTVGDTNVFTQEFLYR | A | 2 | 2245.1015 | 2245.1061 | 0.004529  | 0 | 2.02  | 6.386 | 0.638 | 0 | 1 | 29 | 38 | 2 | 0 | 1 |
| QSUY43_HALMA | 1 | Hypothetical protein | rmAC3098 | rmAC3098 | 357 | 68.6 | 44 | 951 | 1 | R | SGNVVTVGDTNVFTQEFLYR | A | 2 | 2245.1015 | 2245.1063 | 0.004773  | 0 | 2.13  | 6.333 | 0.602 | 0 | 1 | 28 | 38 | 2 | 0 | 1 |
| QSUY43_HALMA | 1 | Hypothetical protein | rmAC3098 | rmAC3098 | 357 | 68.6 | 44 | 951 | 1 | R | SGNVVTVGDTNVFTQEFLYR | A | 2 | 2245.1015 | 2245.118  | 0.016492  | 0 | 7.35  | 6.281 | 0.621 | 0 | 1 | 27 | 38 | 2 | 0 | 1 |
| QSUY43_HALMA | 1 | Hypothetical protein | rmAC3098 | rmAC3098 | 357 | 68.6 | 44 | 951 | 1 | R | SGNVVTVGDTNVFTQEFLYR | A | 2 | 2245.1015 | 2245.1041 | 0.002576  | 0 | 1.15  | 5.973 | 0.649 | 0 | 1 | 29 | 38 | 2 | 0 | 1 |
| QSUY43_HALMA | 1 | Hypothetical protein | rmAC3098 | rmAC3098 | 357 | 68.6 | 44 | 951 | 1 | R | SGNVVTVGDTNVFTQEFLYR | A | 2 | 2245.1015 | 2245.1175 | 0.016004  | 0 | 7.13  | 6.1   | 0.632 | 0 | 1 | 28 |    |   |   |   |







|              |   |                                         |       |          |    |      |    |     |   |   |                  |      |   |   |           |           |           |         |       |       |       |   |   |    |    |   |   |   |                  |
|--------------|---|-----------------------------------------|-------|----------|----|------|----|-----|---|---|------------------|------|---|---|-----------|-----------|-----------|---------|-------|-------|-------|---|---|----|----|---|---|---|------------------|
| Q5UXZ2_HALMA | 1 | H+ ATP synthase sununit C (EC 3.6.3.14) | atpC1 | rmAC3155 | 86 | 67.4 | 14 | 888 | 1 | R | GIGAAAVGAAIAEDES | MFGR | G | 3 | 1820.8727 | 1821.8782 | 1.005447  | -1.0034 | 1.15  | 4.146 | 0.466 | 0 | 1 | 29 | 72 | 2 | 0 | 1 |                  |
| Q5UXZ2_HALMA | 1 | H+ ATP synthase sununit C (EC 3.6.3.14) | atpC1 | rmAC3155 | 86 | 67.4 | 14 | 888 | 1 | R | GIGAAAVGAAIAEDES | MFGR | G | 2 | 1820.8727 | 1820.8717 | -0.001046 | 0       | -0.57 | 4.259 | 0.552 | 0 | 1 | 27 | 36 | 2 | 0 | 1 | GIGAAAVGAAIAEDES |
| Q5UXZ2_HALMA | 1 | H+ ATP synthase sununit C (EC 3.6.3.14) | atpC1 | rmAC3155 | 86 | 67.4 | 14 | 888 | 1 | R | GIGAAAVGAAIAEDES | MFGR | G | 2 | 1836.8727 | 1836.8696 | -0.003121 | 0       | -1.70 | 4.243 | 0.519 | 0 | 1 | 21 | 36 | 2 | 0 | 1 | FGR              |
| Q5UXZ2_HALMA | 1 | H+ ATP synthase sununit C (EC 3.6.3.14) | atpC1 | rmAC3155 | 86 | 67.4 | 14 | 888 | 1 | R | GIGAAAVGAAIAEDES | MFGR | G | 2 | 1820.8727 | 1820.8741 | 0.001395  | 0       | 0.77  | 5.46  | 0.424 | 0 | 1 | 26 | 36 | 2 | 0 | 1 |                  |
| Q5UXZ2_HALMA | 1 | H+ ATP synthase sununit C (EC 3.6.3.14) | atpC1 | rmAC3155 | 86 | 67.4 | 14 | 888 | 1 | R | GIGAAAVGAAIAEDES | MFGR | G | 2 | 1820.8727 | 1820.8706 | -0.002145 | 0       | -1.18 | 5.476 | 0.395 | 0 | 1 | 27 | 36 | 2 | 0 | 1 |                  |
| Q5UXZ2_HALMA | 1 | H+ ATP synthase sununit C (EC 3.6.3.14) | atpC1 | rmAC3155 | 86 | 67.4 | 14 | 888 | 1 | R | GIGAAAVGAAIAEDES | MFGR | G | 2 | 1820.8727 | 1820.8725 | -0.000192 | 0       | -0.11 | 4.851 | 0.575 | 0 | 1 | 27 | 36 | 2 | 0 | 1 |                  |
| Q5UXZ2_HALMA | 1 | H+ ATP synthase sununit C (EC 3.6.3.14) | atpC1 | rmAC3155 | 86 | 67.4 | 14 | 888 | 1 | R | GIGAAAVGAAIAEDES | MFGR | G | 3 | 1820.8727 | 1821.8782 | 1.005447  | -1.0034 | 1.15  | 4.814 | 0.435 | 0 | 1 | 40 | 72 | 2 | 0 | 1 |                  |
| Q5UXZ2_HALMA | 1 | H+ ATP synthase sununit C (EC 3.6.3.14) | atpC1 | rmAC3155 | 86 | 67.4 | 14 | 888 | 1 | R | GIGAAAVGAAIAEDES | MFGR | G | 3 | 1820.8727 | 1820.8736 | 0.000894  | 0       | 0.49  | 4.71  | 0.538 | 0 | 1 | 37 | 72 | 2 | 0 | 1 |                  |
| Q5UXZ2_HALMA | 1 | H+ ATP synthase sununit C (EC 3.6.3.14) | atpC1 | rmAC3155 | 86 | 67.4 | 14 | 888 | 1 | R | GIGAAAVGAAIAEDES | MFGR | G | 2 | 1820.8727 | 1820.8724 | -0.000314 | 0       | -0.17 | 4.41  | 0.55  | 0 | 1 | 27 | 36 | 2 | 0 | 1 |                  |
| Q5UXZ2_HALMA | 1 | H+ ATP synthase sununit C (EC 3.6.3.14) | atpC1 | rmAC3155 | 86 | 67.4 | 14 | 888 | 1 | R | GIGAAAVGAAIAEDES | MFGR | G | 2 | 1836.8727 | 1836.8681 | -0.004586 | 0       | -2.50 | 5.691 | 0.592 | 0 | 1 | 27 | 36 | 2 | 0 | 1 | GIGAAAVGAAIAEDES |
| Q5UXZ2_HALMA | 1 | H+ ATP synthase sununit C (EC 3.6.3.14) | atpC1 | rmAC3155 | 86 | 67.4 | 14 | 888 | 1 | R | GIGAAAVGAAIAEDES | MFGR | G | 2 | 1820.8727 | 1820.87   | -0.002755 | 0       | -1.51 | 4.514 | 0.556 | 0 | 1 | 27 | 36 | 2 | 0 | 1 | FGR              |
| Q5UXZ2_HALMA | 1 | H+ ATP synthase sununit C (EC 3.6.3.14) | atpC1 | rmAC3155 | 86 | 67.4 | 14 | 888 | 1 | R | GIGAAAVGAAIAEDES | MFGR | G | 2 | 1836.8727 | 1836.8702 | -0.002511 | 0       | -1.37 | 4.982 | 0.525 | 0 | 1 | 24 | 36 | 2 | 0 | 1 |                  |
| Q5UXZ2_HALMA | 1 | H+ ATP synthase sununit C (EC 3.6.3.14) | atpC1 | rmAC3155 | 86 | 67.4 | 14 | 888 | 1 | R | GIGAAAVGAAIAEDES | MFGR | G | 2 | 1820.8727 | 1820.8739 | 0.001151  | 0       | 0.63  | 4.67  | 0.569 | 0 | 1 | 27 | 36 | 2 | 0 | 1 | GIGAAAVGAAIAEDES |
| Q5UXZ2_HALMA | 1 | H+ ATP synthase sununit C (EC 3.6.3.14) | atpC1 | rmAC3155 | 86 | 67.4 | 14 | 888 | 1 | R | GIGAAAVGAAIAEDES | MFGR | G | 2 | 1820.8727 | 1820.8722 | -0.000558 | 0       | -0.31 | 4.888 | 0.578 | 0 | 1 | 26 | 36 | 2 | 0 | 1 | FGR              |
| Q5UXZ2_HALMA | 1 | H+ ATP synthase sununit C (EC 3.6.3.14) | atpC1 | rmAC3155 | 86 | 67.4 | 14 | 888 | 1 | R | GIGAAAVGAAIAEDES | MFGR | G | 3 | 1820.8727 | 1820.872  | -0.000754 | 0       | -0.41 | 5.824 | 0.52  | 0 | 1 | 42 | 72 | 2 | 0 | 1 |                  |
| Q5UXZ2_HALMA | 1 | H+ ATP synthase sununit C (EC 3.6.3.14) | atpC1 | rmAC3155 | 86 | 67.4 | 14 | 888 | 1 | R | GIGAAAVGAAIAEDES | MFGR | G |   |           |           |           |         |       |       |       |   |   |    |    |   |   |   |                  |





|              |   |                                         |       |          |    |      |    |     |   |   |                 |      |   |   |           |           |           |   |        |       |       |     |   |    |    |   |   |   |                |
|--------------|---|-----------------------------------------|-------|----------|----|------|----|-----|---|---|-----------------|------|---|---|-----------|-----------|-----------|---|--------|-------|-------|-----|---|----|----|---|---|---|----------------|
| Q5UXZ2_HALMA | 1 | H+ ATP synthase sununit C (EC 3.6.3.14) | atpC1 | rmAC3155 | 86 | 67.4 | 14 | 888 | 1 | R | GIGAAAVGAIAEDES | MFGR | G | 2 | 1820.8727 | 1820.8711 | -0.001656 | 0 | -0.91  | 5.461 | 0.378 | 0   | 1 | 25 | 36 | 2 | 0 | 1 |                |
| Q5UXZ2_HALMA | 1 | H+ ATP synthase sununit C (EC 3.6.3.14) | atpC1 | rmAC3155 | 86 | 67.4 | 14 | 888 | 1 | R | GIGAAAVGAIAEDES | MFGR | G | 2 | 1836.8727 | 1836.8742 | 0.001517  | 0 | 0.83   | 4.84  | 0.424 | 0   | 1 | 23 | 36 | 2 | 0 | 1 | GIGAAVGAIAEDES |
| Q5UXZ2_HALMA | 1 | H+ ATP synthase sununit C (EC 3.6.3.14) | atpC1 | rmAC3155 | 86 | 67.4 | 14 | 888 | 1 | R | GIGAAAVGAIAEDES | MFGR | G | 2 | 1820.8727 | 1820.8735 | 0.000785  | 0 | 0.43   | 4.754 | 0.578 | 0   | 1 | 27 | 36 | 2 | 0 | 1 |                |
| Q5UXZ2_HALMA | 1 | H+ ATP synthase sununit C (EC 3.6.3.14) | atpC1 | rmAC3155 | 86 | 67.4 | 14 | 888 | 1 | R | GIGAAAVGAIAEDES | MFGR | G | 2 | 1836.8727 | 1836.864  | -0.008736 | 0 | -4.76  | 5.138 | 0.47  | 0   | 1 | 26 | 36 | 2 | 0 | 1 | GIGAAVGAIAEDES |
| Q5UXZ2_HALMA | 1 | H+ ATP synthase sununit C (EC 3.6.3.14) | atpC1 | rmAC3155 | 86 | 67.4 | 14 | 888 | 1 | R | GIGAAAVGAIAEDES | MFGR | G | 2 | 1820.8727 | 1820.872  | -0.000068 | 0 | -0.37  | 3.756 | 0.23  | 0.1 | 1 | 25 | 36 | 2 | 0 | 1 |                |
| Q5UXZ2_HALMA | 1 | H+ ATP synthase sununit C (EC 3.6.3.14) | atpC1 | rmAC3155 | 86 | 67.4 | 14 | 888 | 1 | R | GIGAAAVGAIAEDES | MFGR | G | 2 | 1836.8727 | 1836.8708 | -0.001901 | 0 | -1.03  | 5.563 | 0.588 | 0   | 1 | 26 | 36 | 2 | 0 | 1 | GIGAAVGAIAEDES |
| Q5UXZ2_HALMA | 1 | H+ ATP synthase sununit C (EC 3.6.3.14) | atpC1 | rmAC3155 | 86 | 67.4 | 14 | 888 | 1 | R | GIGAAAVGAIAEDES | MFGR | G | 3 | 1836.8727 | 1836.8761 | 0.003396  | 0 | 1.85   | 4.537 | 0.507 | 0   | 1 | 32 | 72 | 2 | 0 | 1 | GIGAAVGAIAEDES |
| Q5UXZ2_HALMA | 1 | H+ ATP synthase sununit C (EC 3.6.3.14) | atpC1 | rmAC3155 | 86 | 67.4 | 14 | 888 | 1 | R | GIGAAAVGAIAEDES | MFGR | G | 2 | 1836.8727 | 1836.8454 | -0.027276 | 0 | -14.85 | 4.812 | 0.405 | 0   | 1 | 23 | 36 | 2 | 0 | 1 | GIGAAVGAIAEDES |
| Q5UXZ2_HALMA | 1 | H+ ATP synthase sununit C (EC 3.6.3.14) | atpC1 | rmAC3155 | 86 | 67.4 | 14 | 888 | 1 | R | GIGAAAVGAIAEDES | MFGR | G | 2 | 1820.8727 | 1820.8654 | -0.007276 | 0 | -4.00  | 4.386 | 0.566 | 0   | 1 | 26 | 36 | 2 | 0 | 1 |                |
| Q5UXZ2_HALMA | 1 | H+ ATP synthase sununit C (EC 3.6.3.14) | atpC1 | rmAC3155 | 86 | 67.4 | 14 | 888 | 1 | R | GIGAAAVGAIAEDES | MFGR | G | 2 | 1820.8727 | 1820.8722 | -0.000558 | 0 | -0.31  | 5.72  | 0.391 | 0   | 1 | 27 | 36 | 2 | 0 | 1 |                |
| Q5UXZ2_HALMA | 1 | H+ ATP synthase sununit C (EC 3.6.3.14) | atpC1 | rmAC3155 | 86 | 67.4 | 14 | 888 | 1 | R | GIGAAAVGAIAEDES | MFGR | G | 3 | 1836.8727 | 1836.8782 | 0.005447  | 0 | 2.97   | 3.189 | 0.432 | 0   | 1 | 25 | 72 | 2 | 0 | 1 | GIGAAVGAIAEDES |
| Q5UXZ2_HALMA | 1 | H+ ATP synthase sununit C (EC 3.6.3.14) | atpC1 | rmAC3155 | 86 | 67.4 | 14 | 888 | 1 | R | GIGAAAVGAIAEDES | MFGR | G | 2 | 1820.8727 | 1820.8744 | 0.00164   | 0 | 0.90   | 5.66  | 0.396 | 0   | 1 | 26 | 36 | 2 | 0 | 1 |                |
| Q5UXZ2_HALMA | 1 | H+ ATP synthase sununit C (EC 3.6.3.14) | atpC1 | rmAC3155 | 86 | 67.4 | 14 | 888 | 1 | R | GIGAAAVGAIAEDES | MFGR | G | 2 | 1820.8727 | 1820.8705 | -0.002267 | 0 | -1.25  | 4.84  | 0.34  | 0   | 1 | 26 | 36 | 2 | 0 | 1 |                |
| Q5UXZ2_HALMA | 1 | H+ ATP synthase sununit C (EC 3.6.3.14) | atpC1 | rmAC3155 | 86 | 67.4 | 14 | 888 | 1 | R | GIGAAAVGAIAEDES | MFGR | G | 2 | 1820.8727 | 1820.8735 | 0.000785  | 0 | 0.43   | 4.666 | 0.568 | 0   | 1 | 27 | 36 | 2 | 0 | 1 |                |
| Q5UXZ2_HALMA | 1 | H+ ATP synthase sununit C (EC 3.6.3.14) | atpC1 | rmAC3155 | 86 | 67.4 | 14 | 888 | 1 | R | GIGAAAVGAIAEDES | MFGR | G | 2 | 1820.8727 | 1820.8757 | 0.002982  | 0 | 1.64   | 5.422 | 0.604 | 0   | 1 | 26 | 36 | 2 | 0 | 1 |                |
| Q5UXZ2_HALMA | 1 | H+ ATP synthase sununit C (EC 3.6.3.14) | atpC1 | rmAC3155 | 86 | 67.4 | 14 | 888 | 1 | R | GIGAAAVGAIAEDES | MFGR | G | 3 | 1         |           |           |   |        |       |       |     |   |    |    |   |   |   |                |





|              |   |   |    |                                      |       |          |    |      |    |     |   |   |                      |   |   |           |           |           |         |       |       |       |   |   |    |    |   |   |   |
|--------------|---|---|----|--------------------------------------|-------|----------|----|------|----|-----|---|---|----------------------|---|---|-----------|-----------|-----------|---------|-------|-------|-------|---|---|----|----|---|---|---|
| Q5UXZ2_HALMA | 1 | 1 | H+ | ATP synthase subunit C (EC 3.6.3.14) | atpC1 | rmAC3155 | 86 | 67.4 | 14 | 888 | 1 | R | GIGAAAVGAAIAEDESMFGR | G | 2 | 1820.8727 | 1820.8741 | 0.001395  | 0       | 0.77  | 4.719 | 0.598 | 0 | 1 | 25 | 36 | 2 | 0 | 1 |
| Q5UXZ2_HALMA | 1 | 1 | H+ | ATP synthase subunit C (EC 3.6.3.14) | atpC1 | rmAC3155 | 86 | 67.4 | 14 | 888 | 1 | R | GIGAAAVGAAIAEDESMFGR | G | 2 | 1820.8727 | 1820.8738 | 0.001029  | 0       | 0.57  | 4.699 | 0.54  | 0 | 1 | 27 | 36 | 2 | 0 | 1 |
| Q5UXZ2_HALMA | 1 | 1 | H+ | ATP synthase subunit C (EC 3.6.3.14) | atpC1 | rmAC3155 | 86 | 67.4 | 14 | 888 | 1 | R | GIGAAAVGAAIAEDESMFGR | G | 2 | 1820.8727 | 1820.8757 | 0.002982  | 0       | 1.64  | 4.68  | 0.566 | 0 | 1 | 26 | 36 | 2 | 0 | 1 |
| Q5UXZ2_HALMA | 1 | 1 | H+ | ATP synthase subunit C (EC 3.6.3.14) | atpC1 | rmAC3155 | 86 | 67.4 | 14 | 888 | 1 | R | GIGAAAVGAAIAEDESMFGR | G | 3 | 1820.8727 | 1821.8721 | 0.999368  | -1.0034 | -2.19 | 5.389 | 0.472 | 0 | 1 | 42 | 72 | 2 | 0 | 1 |
| Q5UXZ2_HALMA | 1 | 1 | H+ | ATP synthase subunit C (EC 3.6.3.14) | atpC1 | rmAC3155 | 86 | 67.4 | 14 | 888 | 1 | R | GIGAAAVGAAIAEDESMFGR | G | 2 | 1820.8727 | 1820.8713 | -0.001412 | 0       | -0.78 | 5.003 | 0.593 | 0 | 1 | 27 | 36 | 2 | 0 | 1 |
| Q5UXZ2_HALMA | 1 | 1 | H+ | ATP synthase subunit C (EC 3.6.3.14) | atpC1 | rmAC3155 | 86 | 67.4 | 14 | 888 | 1 | R | GIGAAAVGAAIAEDESMFGR | G | 2 | 1820.8727 | 1820.8749 | 0.002128  | 0       | 1.17  | 4.283 | 0.533 | 0 | 1 | 25 | 36 | 2 | 0 | 1 |
| Q5UXZ2_HALMA | 1 | 1 | H+ | ATP synthase subunit C (EC 3.6.3.14) | atpC1 | rmAC3155 | 86 | 67.4 | 14 | 888 | 1 | R | GIGAAAVGAAIAEDESMFGR | G | 2 | 1820.8727 | 1820.8719 | -0.000802 | 0       | -0.44 | 5.734 | 0.387 | 0 | 1 | 27 | 36 | 2 | 0 | 1 |
| Q5UXZ2_HALMA | 1 | 1 | H+ | ATP synthase subunit C (EC 3.6.3.14) | atpC1 | rmAC3155 | 86 | 67.4 | 14 | 888 | 1 | R | GIGAAAVGAAIAEDESMFGR | G | 3 | 1820.8727 | 1822.8682 | 1.995447  | -2.0067 | -6.18 | 5.099 | 0.442 | 0 | 1 | 36 | 72 | 2 | 0 | 1 |
| Q5UXZ2_HALMA | 1 | 1 | H+ | ATP synthase subunit C (EC 3.6.3.14) | atpC1 | rmAC3155 | 86 | 67.4 | 14 | 888 | 1 | R | GIGAAAVGAAIAEDESMFGR | G | 3 | 1820.8727 | 1820.8778 | 0.005105  | 0       | 2.80  | 4.139 | 0.374 | 0 | 1 | 30 | 72 | 2 | 0 | 1 |
| Q5UXZ2_HALMA | 1 | 1 | H+ | ATP synthase subunit C (EC 3.6.3.14) | atpC1 | rmAC3155 | 86 | 67.4 | 14 | 888 | 1 | R | GIGAAAVGAAIAEDESMFGR | G | 2 | 1820.8727 | 1821.8723 | 0.999564  | -1.0034 | -2.08 | 5.477 | 0.544 | 0 | 1 | 25 | 36 | 2 | 0 | 1 |
| Q5UXZ2_HALMA | 1 | 1 | H+ | ATP synthase subunit C (EC 3.6.3.14) | atpC1 | rmAC3155 | 86 | 67.4 | 14 | 888 | 1 | R | GIGAAAVGAAIAEDESMFGR | G | 2 | 1820.8727 | 1820.8717 | -0.001046 | 0       | -0.57 | 4.507 | 0.571 | 0 | 1 | 26 | 36 | 2 | 0 | 1 |
| Q5UXZ2_HALMA | 1 | 1 | H+ | ATP synthase subunit C (EC 3.6.3.14) | atpC1 | rmAC3155 | 86 | 67.4 | 14 | 888 | 1 | R | GIGAAAVGAAIAEDESMFGR | G | 2 | 1820.8727 | 1820.8763 | 0.003593  | 0       | 1.97  | 4.491 | 0.554 | 0 | 1 | 27 | 36 | 2 | 0 | 1 |
| Q5UXZ2_HALMA | 1 | 1 | H+ | ATP synthase subunit C (EC 3.6.3.14) | atpC1 | rmAC3155 | 86 | 67.4 | 14 | 888 | 1 | R | GIGAAAVGAAIAEDESMFGR | G | 2 | 1820.8727 | 1820.8713 | -0.001412 | 0       | -0.78 | 5.501 | 0.423 | 0 | 1 | 26 | 36 | 2 | 0 | 1 |
| Q5UXZ2_HALMA | 1 | 1 | H+ | ATP synthase subunit C (EC 3.6.3.14) | atpC1 | rmAC3155 | 86 | 67.4 | 14 | 888 | 1 | R | GIGAAAVGAAIAEDESMFGR | G | 2 | 1820.8727 | 1820.8739 | 0.001151  | 0       | 0.63  | 5.421 | 0.375 | 0 | 1 | 26 | 36 | 2 | 0 | 1 |
| Q5UXZ2_HALMA | 1 | 1 | H+ | ATP synthase subunit C (EC 3.6.3.14) | atpC1 | rmAC3155 | 86 | 67.4 | 14 | 888 | 1 | R | GIGAAAVGAAIAEDESMFGR | G | 2 | 1820.8727 | 1820.8698 | -0.002877 | 0       | -1.58 | 4.594 | 0.579 | 0 | 1 | 28 | 36 | 2 | 0 | 1 |
| Q5UXZ2_HALMA | 1 | 1 | H+ | ATP synthase subunit C (EC 3.6.3.14) | atpC1 | rmAC3155 | 86 | 67.4 | 14 | 888 | 1 | R | GIGAAAV              |   |   |           |           |           |         |       |       |       |   |   |    |    |   |   |   |











|              |   |                    |     |          |     |    |    |     |        |   |               |   |   |           |           |           |         |        |       |       |     |    |    |    |   |   |   |
|--------------|---|--------------------|-----|----------|-----|----|----|-----|--------|---|---------------|---|---|-----------|-----------|-----------|---------|--------|-------|-------|-----|----|----|----|---|---|---|
| Q5UY42_HALMA | 1 | Proteinase IV-like | edp | rmAC3099 | 308 | 63 | 43 | 840 | 0.9991 | R | DQYYASLESMKR  | A | 2 | 1489.6871 | 1489.6843 | -0.002824 | 0       | -1.90  | 3.002 | 0.113 | 0.2 | 1  | 16 | 22 | 2 | 0 | 1 |
| Q5UY42_HALMA | 1 | Proteinase IV-like | edp | rmAC3099 | 308 | 63 | 43 | 840 | 0.9983 | R | DQYYASLESMKR  | A | 3 | 1489.6871 | 1489.6853 | -0.001861 | 0       | -1.25  | 2.444 | 0.218 | 0.8 | 9  | 17 | 44 | 2 | 0 | 1 |
| Q5UY42_HALMA | 1 | Proteinase IV-like | edp | rmAC3099 | 308 | 63 | 43 | 840 | 0.9972 | R | DQYYASLESMKR  | A | 3 | 1489.6871 | 1489.6851 | -0.002044 | 0       | -1.37  | 2.087 | 0.233 | 0.2 | 6  | 18 | 44 | 2 | 0 | 1 |
| Q5UY42_HALMA | 1 | Proteinase IV-like | edp | rmAC3099 | 308 | 63 | 43 | 840 | 0.9961 | R | DQYYASLESMKR  | A | 3 | 1489.6871 | 1489.6837 | -0.003417 | 0       | -2.29  | 2.651 | 0.124 | 0.5 | 1  | 21 | 44 | 2 | 0 | 1 |
| Q5UY42_HALMA | 1 | Proteinase IV-like | edp | rmAC3099 | 308 | 63 | 43 | 840 | 0.9937 | R | DQYYASLESMKR  | A | 3 | 1489.6871 | 1489.6841 | -0.003051 | 0       | -2.05  | 2.267 | 0.207 | 0.5 | 27 | 18 | 44 | 2 | 0 | 1 |
| Q5UY42_HALMA | 1 | Proteinase IV-like | edp | rmAC3099 | 308 | 63 | 43 | 840 | 0.9934 | R | DQYYASLESMKR  | A | 2 | 1505.6871 | 1505.6254 | -0.061676 | 0       | -40.96 | 2.12  | 0.166 | 0.3 | 2  | 11 | 22 | 2 | 0 | 1 |
| Q5UY42_HALMA | 1 | Proteinase IV-like | edp | rmAC3099 | 308 | 63 | 43 | 840 | 0.9927 | R | DQYYASLESMKR  | A | 3 | 1489.6871 | 1489.686  | -0.001128 | 0       | -0.76  | 2.443 | 0.141 | 0.2 | 3  | 20 | 44 | 2 | 0 | 1 |
| Q5UY42_HALMA | 1 | Proteinase IV-like | edp | rmAC3099 | 308 | 63 | 43 | 840 | 0.9707 | R | DQYYASLESMKR  | A | 3 | 1505.6871 | 1505.679  | -0.008147 | 0       | -5.41  | 1.563 | 0.193 | 0.9 | 2  | 21 | 44 | 2 | 0 | 1 |
| Q5UY42_HALMA | 1 | Proteinase IV-like | edp | rmAC3099 | 308 | 63 | 43 | 840 | 0.9314 | R | DQYYASLESMKR  | A | 3 | 1505.6871 | 1505.6804 | -0.006682 | 0       | -4.44  | 1.593 | 0.2   | 1.1 | 36 | 18 | 44 | 2 | 0 | 1 |
| Q5UY42_HALMA | 1 | Proteinase IV-like | edp | rmAC3099 | 308 | 63 | 43 | 840 | 1      | R | ETVAEASAYQGGR | A | 2 | 1337.6211 | 1337.6186 | -0.002498 | 0       | -1.87  | 3.487 | 0.426 | 0   | 1  | 19 | 24 | 2 | 0 | 1 |
| Q5UY42_HALMA | 1 | Proteinase IV-like | edp | rmAC3099 | 308 | 63 | 43 | 840 | 1      | R | ETVAEASAYQGGR | A | 2 | 1337.6211 | 1337.6201 | -0.001033 | 0       | -0.77  | 4.016 | 0.535 | 0   | 1  | 20 | 24 | 2 | 0 | 1 |
| Q5UY42_HALMA | 1 | Proteinase IV-like | edp | rmAC3099 | 308 | 63 | 43 | 840 | 1      | R | ETVAEASAYQGGR | A | 2 | 1337.6211 | 1337.6202 | -0.000911 | 0       | -0.68  | 2.869 | 0.446 | 0   | 1  | 19 | 24 | 2 | 0 | 1 |
| Q5UY42_HALMA | 1 | Proteinase IV-like | edp | rmAC3099 | 308 | 63 | 43 | 840 | 1      | R | ETVAEASAYQGGR | A | 2 | 1337.6211 | 1337.6207 | -0.000423 | 0       | -0.32  | 3.601 | 0.485 | 0   | 1  | 18 | 24 | 2 | 0 | 1 |
| Q5UY42_HALMA | 1 | Proteinase IV-like | edp | rmAC3099 | 308 | 63 | 43 | 840 | 1      | R | ETVAEASAYQGGR | A | 2 | 1337.6211 | 1338.6254 | 1.004324  | -1.0034 | 0.73   | 3.969 | 0.454 | 0   | 1  | 21 | 24 | 2 | 0 | 1 |
| Q5UY42_HALMA | 1 | Proteinase IV-like | edp | rmAC3099 | 308 | 63 | 43 | 840 | 1      | R | ETVAEASAYQGGR | A | 2 | 1337.6211 | 1337.6186 | -0.002498 | 0       | -1.87  | 3.746 | 0.515 | 0   | 1  | 21 | 24 | 2 | 0 | 1 |
| Q5UY42_HALMA | 1 | Proteinase IV-like | edp | rmAC3099 | 308 | 63 | 43 | 840 | 1      | R | ETVAEASAYQGGR | A | 2 | 1337.6211 | 1337.6192 | -0.001887 | 0       | -1.41  | 3.728 | 0.401 | 0   | 1  | 20 | 24 | 2 | 0 | 1 |
| Q5UY42_HALMA | 1 | Proteinase IV-like | edp | rmAC3099 | 308 | 63 | 43 | 840 | 1      | R | ETVAEASAYQGGR | A | 2 | 1337.6211 | 1337.6212 | 0.000066  | 0       | 0.05   | 3.938 | 0.508 | 0   | 1  | 21 | 24 | 2 | 0 | 1 |
| Q5UY42_HALMA | 1 | Proteinase IV-like | edp | rmAC3099 | 308 | 6  |    |     |        |   |               |   |   |           |           |           |         |        |       |       |     |    |    |    |   |   |   |

|              |   |                    |     |          |     |    |    |     |   |   |                     |   |   |           |           |           |         |       |       |       |   |    |    |    |   |   |   |
|--------------|---|--------------------|-----|----------|-----|----|----|-----|---|---|---------------------|---|---|-----------|-----------|-----------|---------|-------|-------|-------|---|----|----|----|---|---|---|
| Q5UY42_HALMA | 1 | Proteinase IV-like | edp | rmAC3099 | 308 | 63 | 43 | 840 | 1 | R | ISSPGGSAASSESMYLAVK | R | 2 | 1840.8877 | 1840.8854 | -0.002276 | 0       | -1.24 | 3.221 | 0.367 | 0 | 16 | 13 | 36 | 2 | 0 | 1 |
| Q5UY42_HALMA | 1 | Proteinase IV-like | edp | rmAC3099 | 308 | 63 | 43 | 840 | 1 | R | ISSPGGSAASSESMYLAVK | R | 2 | 1840.8877 | 1840.8854 | -0.002274 | 0       | -1.29 | 4.579 | 0.583 | 0 | 1  | 24 | 36 | 2 | 0 | 1 |
| Q5UY42_HALMA | 1 | Proteinase IV-like | edp | rmAC3099 | 308 | 63 | 43 | 840 | 1 | R | ISSPGGSAASSESMYLAVK | R | 2 | 1840.8877 | 1840.8847 | -0.002984 | 0       | -1.62 | 4.378 | 0.629 | 0 | 1  | 23 | 36 | 2 | 0 | 1 |
| Q5UY42_HALMA | 1 | Proteinase IV-like | edp | rmAC3099 | 308 | 63 | 43 | 840 | 1 | R | ISSPGGSAASSESMYLAVK | R | 2 | 1840.8877 | 1840.8937 | 0.005927  | 0       | 3.22  | 3.491 | 0.517 | 0 | 1  | 18 | 36 | 2 | 0 | 1 |
| Q5UY42_HALMA | 1 | Proteinase IV-like | edp | rmAC3099 | 308 | 63 | 43 | 840 | 1 | R | ISSPGGSAASSESMYLAVK | R | 2 | 1840.8877 | 1841.8862 | 0.99848   | -1.0034 | -2.65 | 3.249 | 0.429 | 0 | 1  | 17 | 36 | 2 | 0 | 1 |
| Q5UY42_HALMA | 1 | Proteinase IV-like | edp | rmAC3099 | 308 | 63 | 43 | 840 | 1 | R | ISSPGGSAASSESMYLAVK | R | 2 | 1840.8877 | 1840.8863 | -0.001398 | 0       | -0.76 | 4.748 | 0.608 | 0 | 1  | 25 | 36 | 2 | 0 | 1 |
| Q5UY42_HALMA | 1 | Proteinase IV-like | edp | rmAC3099 | 308 | 63 | 43 | 840 | 1 | R | ISSPGGSAASSESMYLAVK | R | 2 | 1840.8877 | 1840.8889 | 0.001288  | 0       | 0.70  | 5.553 | 0.596 | 0 | 1  | 24 | 36 | 2 | 0 | 1 |
| Q5UY42_HALMA | 1 | Proteinase IV-like | edp | rmAC3099 | 308 | 63 | 43 | 840 | 1 | R | ISSPGGSAASSESMYLAVK | R | 2 | 1840.8877 | 1840.8869 | -0.000787 | 0       | -0.43 | 3.99  | 0.521 | 0 | 1  | 22 | 36 | 2 | 0 | 1 |
| Q5UY42_HALMA | 1 | Proteinase IV-like | edp | rmAC3099 | 308 | 63 | 43 | 840 | 1 | R | ISSPGGSAASSESMYLAVK | R | 2 | 1840.8877 | 1840.8889 | 0.001166  | 0       | 0.63  | 4.69  | 0.634 | 0 | 1  | 21 | 36 | 2 | 0 | 1 |
| Q5UY42_HALMA | 1 | Proteinase IV-like | edp | rmAC3099 | 308 | 63 | 43 | 840 | 1 | R | ISSPGGSAASSESMYLAVK | R | 2 | 1840.8877 | 1840.8885 | 0.0008    | 0       | 0.43  | 4.145 | 0.587 | 0 | 1  | 23 | 36 | 2 | 0 | 1 |
| Q5UY42_HALMA | 1 | Proteinase IV-like | edp | rmAC3099 | 308 | 63 | 43 | 840 | 1 | R | ISSPGGSAASSESMYLAVK | R | 2 | 1840.8877 | 1840.8902 | 0.002509  | 0       | 1.36  | 3.67  | 0.308 | 0 | 1  | 24 | 36 | 2 | 0 | 1 |
| Q5UY42_HALMA | 1 | Proteinase IV-like | edp | rmAC3099 | 308 | 63 | 43 | 840 | 1 | R | ISSPGGSAASSESMYLAVK | R | 2 | 1840.8877 | 1840.9016 | 0.013861  | 0       | 7.53  | 5.076 | 0.572 | 0 | 1  | 25 | 36 | 2 | 0 | 1 |
| Q5UY42_HALMA | 1 | Proteinase IV-like | edp | rmAC3099 | 308 | 63 | 43 | 840 | 1 | R | ISSPGGSAASSESMYLAVK | R | 2 | 1840.8877 | 1840.8836 | -0.004083 | 0       | -2.22 | 3.441 | 0.475 | 0 | 1  | 16 | 36 | 2 | 0 | 1 |
| Q5UY42_HALMA | 1 | Proteinase IV-like | edp | rmAC3099 | 308 | 63 | 43 | 840 | 1 | R | ISSPGGSAASSESMYLAVK | R | 2 | 1840.8877 | 1840.8888 | 0.001044  | 0       | 0.57  | 4.202 | 0.61  | 0 | 1  | 24 | 36 | 2 | 0 | 1 |
| Q5UY42_HALMA | 1 | Proteinase IV-like | edp | rmAC3099 | 308 | 63 | 43 | 840 | 1 | R | ISSPGGSAASSESMYLAVK | R | 2 | 1840.8877 | 1840.8854 | -0.002276 | 0       | -1.24 | 3.543 | 0.367 | 0 | 1  | 19 | 36 | 2 | 0 | 1 |
| Q5UY42_HALMA | 1 | Proteinase IV-like | edp | rmAC3099 | 308 | 63 | 43 | 840 | 1 | R | ISSPGGSAASSESMYLAVK | R | 2 | 1840.8877 | 1840.8854 | -0.002276 | 0       | -1.24 | 4.167 | 0.483 | 0 | 1  | 22 | 36 | 2 | 0 | 1 |
| Q5UY42_HALMA | 1 | Proteinase IV-like | edp | rmAC3099 | 308 | 63 | 43 | 840 | 1 | R | ISSPGGSAASSESMYLAVK | R | 2 | 1840.8877 | 1840.8854 | -0.002276 | 0       | -1.24 | 3.155 | 0.353 | 0 | 1  | 19 | 36 | 2 | 0 | 1 |
| Q5UY42_HALMA | 1 | Proteinase IV-like | edp | rmAC3099 | 308 | 63 | 4  |     |   |   |                     |   |   |           |           |           |         |       |       |       |   |    |    |    |   |   |   |

















[illegible]









[illegible]



|              |   |                                       |      |          |     |      |    |     |   |   |              |   |   |           |           |           |         |         |       |       |     |   |    |    |   |   |   |
|--------------|---|---------------------------------------|------|----------|-----|------|----|-----|---|---|--------------|---|---|-----------|-----------|-----------|---------|---------|-------|-------|-----|---|----|----|---|---|---|
| Q5V092_HALMA | 1 | Dipeptide ABC transporter ATP-binding | dppD | rmAC2228 | 575 | 47.5 | 24 | 425 | 1 | R | NLAMFASAVLSK | A | 2 | 1250.6693 | 1250.6689 | -0.000405 | 0       | -0.32   | 3.941 | 0.482 | 0   | 1 | 19 | 22 | 2 | 0 | 1 |
| Q5V092_HALMA | 1 | Dipeptide ABC transporter ATP-binding | dppD | rmAC2228 | 575 | 47.5 | 24 | 425 | 1 | R | NLAMFASAVLSK | A | 2 | 1250.6693 | 1250.6634 | -0.005898 | 0       | -4.72   | 3.014 | 0.466 | 0   | 1 | 19 | 22 | 2 | 0 | 1 |
| Q5V092_HALMA | 1 | Dipeptide ABC transporter ATP-binding | dppD | rmAC2228 | 575 | 47.5 | 24 | 425 | 1 | R | NLAMFASAVLSK | A | 2 | 1250.6693 | 1250.6678 | -0.001503 | 0       | -1.20   | 3.581 | 0.498 | 0   | 1 | 20 | 22 | 2 | 0 | 1 |
| Q5V092_HALMA | 1 | Dipeptide ABC transporter ATP-binding | dppD | rmAC2228 | 575 | 47.5 | 24 | 425 | 1 | R | NLAMFASAVLSK | A | 2 | 1250.6693 | 1250.6697 | 0.000328  | 0       | 0.26    | 3.708 | 0.504 | 0   | 1 | 19 | 22 | 2 | 0 | 1 |
| Q5V092_HALMA | 1 | Dipeptide ABC transporter ATP-binding | dppD | rmAC2228 | 575 | 47.5 | 24 | 425 | 1 | R | NLAMFASAVLSK | A | 2 | 1266.6693 | 1266.6638 | -0.005532 | 0       | -4.37   | 4.03  | 0.376 | 0   | 1 | 20 | 22 | 2 | 0 | 1 |
| Q5V092_HALMA | 1 | Dipeptide ABC transporter ATP-binding | dppD | rmAC2228 | 575 | 47.5 | 24 | 425 | 1 | R | NLAMFASAVLSK | A | 2 | 1250.6693 | 1250.6689 | -0.000405 | 0       | -0.32   | 3.443 | 0.246 | 0   | 1 | 19 | 22 | 2 | 0 | 1 |
| Q5V092_HALMA | 1 | Dipeptide ABC transporter ATP-binding | dppD | rmAC2228 | 575 | 47.5 | 24 | 425 | 1 | R | NLAMFASAVLSK | A | 2 | 1250.6693 | 1250.6758 | 0.006431  | 0       | 5.14    | 3.776 | 0.445 | 0   | 1 | 18 | 22 | 2 | 0 | 1 |
| Q5V092_HALMA | 1 | Dipeptide ABC transporter ATP-binding | dppD | rmAC2228 | 575 | 47.5 | 24 | 425 | 1 | R | NLAMFASAVLSK | A | 2 | 1250.6693 | 1250.6678 | -0.001503 | 0       | -1.20   | 4.025 | 0.229 | 0.1 | 1 | 19 | 22 | 2 | 0 | 1 |
| Q5V092_HALMA | 1 | Dipeptide ABC transporter ATP-binding | dppD | rmAC2228 | 575 | 47.5 | 24 | 425 | 1 | R | NLAMFASAVLSK | A | 2 | 1250.6693 | 1252.3654 | 1.696124  | -2.0067 | -248.33 | 3.454 | 0.385 | 0   | 1 | 16 | 22 | 2 | 0 | 1 |
| Q5V092_HALMA | 1 | Dipeptide ABC transporter ATP-binding | dppD | rmAC2228 | 575 | 47.5 | 24 | 425 | 1 | R | NLAMFASAVLSK | A | 2 | 1250.6693 | 1250.6626 | -0.006752 | 0       | -5.40   | 3.561 | 0.49  | 0   | 1 | 20 | 22 | 2 | 0 | 1 |
| Q5V092_HALMA | 1 | Dipeptide ABC transporter ATP-binding | dppD | rmAC2228 | 575 | 47.5 | 24 | 425 | 1 | R | NLAMFASAVLSK | A | 2 | 1250.6693 | 1250.6697 | 0.000328  | 0       | 0.26    | 3.184 | 0.502 | 0   | 1 | 18 | 22 | 2 | 0 | 1 |
| Q5V092_HALMA | 1 | Dipeptide ABC transporter ATP-binding | dppD | rmAC2228 | 575 | 47.5 | 24 | 425 | 1 | R | NLAMFASAVLSK | A | 2 | 1250.6693 | 1250.67   | 0.000694  | 0       | 0.55    | 3.522 | 0.516 | 0   | 1 | 20 | 22 | 2 | 0 | 1 |
| Q5V092_HALMA | 1 | Dipeptide ABC transporter ATP-binding | dppD | rmAC2228 | 575 | 47.5 | 24 | 425 | 1 | R | NLAMFASAVLSK | A | 2 | 1250.6693 | 1250.6654 | -0.003876 | 0       | -3.10   | 3.397 | 0.433 | 0   | 1 | 20 | 22 | 2 | 0 | 1 |
| Q5V092_HALMA | 1 | Dipeptide ABC transporter ATP-binding | dppD | rmAC2228 | 575 | 47.5 | 24 | 425 | 1 | R | NLAMFASAVLSK | A | 2 | 1250.6693 | 1250.6683 | -0.001015 | 0       | -0.81   | 3.02  | 0.369 | 0   | 1 | 18 | 22 | 2 | 0 | 1 |
| Q5V092_HALMA | 1 | Dipeptide ABC transporter ATP-binding | dppD | rmAC2228 | 575 | 47.5 | 24 | 425 | 1 | R | NLAMFASAVLSK | A | 2 | 1250.6693 | 1250.6657 | -0.003579 | 0       | -2.86   | 3.41  | 0.51  | 0   | 1 | 19 | 22 | 2 | 0 | 1 |
| Q5V092_HALMA | 1 | Dipeptide ABC transporter ATP-binding | dppD | rmAC2228 | 575 | 47.5 | 24 | 425 | 1 | R | NLAMFASAVLSK | A | 2 | 1250.6693 | 1250.6698 | 0.00045   | 0       | 0.36    | 3.878 | 0.456 | 0   | 1 | 20 | 22 | 2 | 0 | 1 |
| Q5V092_HALMA | 1 | Dipeptide ABC transporter ATP-binding | dppD | rmAC2228 | 575 | 47.5 | 24 | 425 | 1 | R | NLAMFASAVLSK | A | 2 | 1250.6693 | 1250.6633 | -0.00602  | 0       | -4.81   | 4.061 | 0.41  | 0   | 1 | 19 | 22 | 2 | 0 | 1 |
| Q5V092_HALMA | 1 | Dipeptide ABC transporter ATP-binding | dppD | rmAC2228 | 575 | 47.5 |    |     |   |   |              |   |   |           |           |           |         |         |       |       |     |   |    |    |   |   |   |















[illegible]







[illegible]

[illegible]

















|              |   |                                       |      |          |     |      |    |    |        |   |                           |   |   |           |           |           |         |         |       |       |     |     |    |     |   |   |   |
|--------------|---|---------------------------------------|------|----------|-----|------|----|----|--------|---|---------------------------|---|---|-----------|-----------|-----------|---------|---------|-------|-------|-----|-----|----|-----|---|---|---|
| QSV093_HALMA | 1 | Dipeptide ABC transporter ATP-binding | dppF | rmAC2227 | 890 | 44.8 | 29 | 69 | 1      | R | LEPPTDGKVVFAQDLSLSDKSLGR  | E | 3 | 2686.4177 | 2687.4382 | 1.020447  | -1.0034 | 6.36    | 4.985 | 0.493 | 0   | 1   | 31 | 96  | 2 | 2 | 1 |
| QSV093_HALMA | 1 | Dipeptide ABC transporter ATP-binding | dppF | rmAC2227 | 890 | 44.8 | 29 | 69 | 0.9934 | R | LPASLETTADDRTLAK          | Q | 3 | 1700.8945 | 1700.8949 | 0.000334  | 0       | 0.20    | 2.258 | 0.265 | 0.4 | 17  | 21 | 60  | 2 | 1 | 1 |
| QSV093_HALMA | 1 | Dipeptide ABC transporter ATP-binding | dppF | rmAC2227 | 890 | 44.8 | 29 | 69 | 0.9999 | - | MRDLLTLSDLR               | T | 3 | 1331.7231 | 1331.7224 | -0.000751 | 0       | -0.56   | 3.89  | 0.198 | 0.1 | 1   | 28 | 40  | 2 | 1 | 1 |
| QSV093_HALMA | 1 | Dipeptide ABC transporter ATP-binding | dppF | rmAC2227 | 890 | 44.8 | 29 | 69 | 0.9998 | - | MRDLLTLSDLR               | T | 3 | 1331.7231 | 1331.7226 | -0.000477 | 0       | -0.36   | 3.414 | 0.212 | 0.2 | 1   | 27 | 40  | 2 | 1 | 1 |
| QSV093_HALMA | 1 | Dipeptide ABC transporter ATP-binding | dppF | rmAC2227 | 890 | 44.8 | 29 | 69 | 0.9964 | - | MRDLLTLSDLR               | T | 3 | 1347.7231 | 1347.7173 | -0.005848 | 0       | -4.34   | 2.534 | 0.211 | 0.3 | 5   | 20 | 40  | 2 | 1 | 1 |
| QSV093_HALMA | 1 | Dipeptide ABC transporter ATP-binding | dppF | rmAC2227 | 890 | 44.8 | 29 | 69 | 0.9945 | - | MRDLLTLSDLR               | T | 3 | 1331.7231 | 1332.3382 | 0.615047  | -1.0034 | -291.58 | 3.05  | 0.188 | 1.5 | 48  | 18 | 40  | 2 | 1 | 1 |
| QSV093_HALMA | 1 | Dipeptide ABC transporter ATP-binding | dppF | rmAC2227 | 890 | 44.8 | 29 | 69 | 0.999  | R | MTVGGQTMEPLKIHDLPEDTGDGSR | E | 5 | 2895.4219 | 2895.4205 | -0.001458 | 0       | -0.50   | 2.595 | 0.108 | 1.4 | 1   | 54 | 200 | 2 | 1 | 1 |
| QSV093_HALMA | 1 | Dipeptide ABC transporter ATP-binding | dppF | rmAC2227 | 890 | 44.8 | 29 | 69 | 0.9948 | R | MTVGGQTMEPLKIHDLPEDTGDGSR | E | 5 | 2895.4219 | 2895.4205 | -0.001458 | 0       | -0.50   | 2.429 | 0.033 | 0.4 | 1   | 54 | 200 | 2 | 1 | 1 |
| QSV093_HALMA | 1 | Dipeptide ABC transporter ATP-binding | dppF | rmAC2227 | 890 | 44.8 | 29 | 69 | 0.9996 | D | PQYDRYPHELSGGQR           | Q | 4 | 1916.8765 | 1916.8763 | -0.000234 | 0       | -0.12   | 3.906 | 0.375 | 0   | 1   | 38 | 90  | 1 | 1 | 1 |
| QSV093_HALMA | 1 | Dipeptide ABC transporter ATP-binding | dppF | rmAC2227 | 890 | 44.8 | 29 | 69 | 0.9994 | D | PQYDRYPHELSGGQR           | Q | 3 | 1916.8765 | 1916.8882 | 0.011647  | 0       | 6.08    | 4.268 | 0.326 | 0   | 1   | 32 | 60  | 1 | 1 | 1 |
| QSV093_HALMA | 1 | Dipeptide ABC transporter ATP-binding | dppF | rmAC2227 | 890 | 44.8 | 29 | 69 | 0.9982 | D | PQYDRYPHELSGGQR           | Q | 4 | 1916.8765 | 1916.873  | -0.00353  | 0       | -1.84   | 3.805 | 0.299 | 0   | 1   | 37 | 90  | 1 | 1 | 1 |
| QSV093_HALMA | 1 | Dipeptide ABC transporter ATP-binding | dppF | rmAC2227 | 890 | 44.8 | 29 | 69 | 0.9981 | D | PQYDRYPHELSGGQR           | Q | 4 | 1916.8765 | 1916.8743 | -0.002187 | 0       | -1.14   | 3.496 | 0.299 | 0   | 1   | 39 | 90  | 1 | 1 | 1 |
| QSV093_HALMA | 1 | Dipeptide ABC transporter ATP-binding | dppF | rmAC2227 | 890 | 44.8 | 29 | 69 | 0.9704 | R | QLMEVVDGLKK               | H | 2 | 1159.6271 | 1159.6254 | -0.001676 | 0       | -1.45   | 2.095 | 0.191 | 1.9 | 157 | 11 | 18  | 2 | 0 | 1 |
| QSV093_HALMA | 1 | Dipeptide ABC transporter ATP-binding | dppF | rmAC2227 | 890 | 44.8 | 29 | 69 | 0.9999 | R | QRVEDEAISIDAVR            | E | 2 | 1599.8216 | 1599.8254 | 0.003824  | 0       | 2.39    | 2.804 | 0.415 | 0   | 1   | 16 | 26  | 2 | 1 | 1 |
| QSV093_HALMA | 1 | Dipeptide ABC transporter ATP-binding | dppF | rmAC2227 | 890 | 44.8 | 29 | 69 | 0.9999 | R | QRVEDEAISIDAVR            | E | 3 | 1599.8216 | 1599.8214 | -0.000252 | 0       | -0.16   | 3.651 | 0.246 | 0.1 | 3   | 25 | 52  | 2 | 1 | 1 |
| QSV093_HALMA | 1 | Dipeptide ABC transporter ATP-binding | dppF | rmAC2227 | 890 | 44.8 | 29 | 69 | 0.9998 | R | QRVEDEAISIDAVR            | E | 3 | 1599.8216 | 1599.8214 | -0.000252 | 0       | -0.16   | 3.594 | 0.217 | 0.1 | 1   | 27 | 52  | 2 | 1 | 1 |
| QSV093_HALMA | 1 | Dipeptide ABC transporter ATP-binding | dppF | rmAC2227 | 890 | 44.8 | 29 | 69 | 0.9999 | K | QTMFDRFFETDLAGENRR        | V | 3 | 2232.0382 | 2232.0375 | -0.000727 | 0       | -0.33   | 3.249 |       |     |     |    |     |   |   |   |



















[illegible]













|              |   |                   |         |         |     |      |    |    |        |   |                             |   |   |           |           |           |         |       |       |       |     |    |    |     |   |   |   |
|--------------|---|-------------------|---------|---------|-----|------|----|----|--------|---|-----------------------------|---|---|-----------|-----------|-----------|---------|-------|-------|-------|-----|----|----|-----|---|---|---|
| Q5V6N0_HALMA | 1 | Putative permease | pNG7110 | pNG7110 | 318 | 52.8 | 13 | 36 | 1      | R | ATAPAEASAEPVDSAESSESVS      | A | 3 | 2277.0132 | 2277.0109 | -0.002277 | 0       | -1.00 | 4.917 | 0.562 | 0   | 1  | 34 | 88  | 2 | 0 | 1 |
| Q5V6N0_HALMA | 1 | Putative permease | pNG7110 | pNG7110 | 318 | 52.8 | 13 | 36 | 1      | R | ATAPAEASAEPVDSAESSESVS      | A | 3 | 2277.0132 | 2277.0098 | -0.003376 | 0       | -1.48 | 4.848 | 0.559 | 0   | 1  | 33 | 88  | 2 | 0 | 1 |
| Q5V6N0_HALMA | 1 | Putative permease | pNG7110 | pNG7110 | 318 | 52.8 | 13 | 36 | 1      | R | ATAPAEASAEPVDSAESSESVS      | A | 2 | 2277.0132 | 2278.0254 | 1.012224  | -1.0034 | 3.90  | 3.877 | 0.472 | 0   | 1  | 20 | 44  | 2 | 0 | 1 |
| Q5V6N0_HALMA | 1 | Putative permease | pNG7110 | pNG7110 | 318 | 52.8 | 13 | 36 | 1      | R | ATAPAEASAEPVDSAESSESVS      | A | 2 | 2277.0132 | 2277.013  | -0.000189 | 0       | -0.08 | 5.144 | 0.573 | 0   | 1  | 27 | 44  | 2 | 0 | 1 |
| Q5V6N0_HALMA | 1 | Putative permease | pNG7110 | pNG7110 | 318 | 52.8 | 13 | 36 | 0.9989 | R | ATAPAEASAEPVDSAESSESVS      | A | 2 | 2277.0132 | 2277.014  | 0.000788  | 0       | 0.35  | 3.018 | 0.144 | 0.2 | 1  | 17 | 44  | 2 | 0 | 1 |
| Q5V6N0_HALMA | 1 | Putative permease | pNG7110 | pNG7110 | 318 | 52.8 | 13 | 36 | 0.9987 | R | ATAPAEASAEPVDSAESSESVS      | A | 2 | 2277.0132 | 2277.0143 | 0.001032  | 0       | 0.45  | 2.936 | 0.233 | 0.3 | 24 | 11 | 44  | 2 | 0 | 1 |
| Q5V6N0_HALMA | 1 | Putative permease | pNG7110 | pNG7110 | 318 | 52.8 | 13 | 36 | 1      | R | NEQAEDDDVETGVVEEQ           | G | 2 | 1933.8025 | 1933.8009 | -0.001647 | 0       | -0.85 | 5.489 | 0.392 | 0   | 1  | 25 | 32  | 2 | 0 | 1 |
| Q5V6N0_HALMA | 1 | Putative permease | pNG7110 | pNG7110 | 318 | 52.8 | 13 | 36 | 1      | R | NEQAEDDDVETGVVEEQ           | G | 2 | 1933.8025 | 1933.7978 | -0.004699 | 0       | -2.43 | 4.685 | 0.491 | 0   | 1  | 25 | 32  | 2 | 0 | 1 |
| Q5V6N0_HALMA | 1 | Putative permease | pNG7110 | pNG7110 | 318 | 52.8 | 13 | 36 | 1      | K | RLNLDMPDPTDSDLDTAIENSEATTTR | A | 3 | 3021.3833 | 3022.3905 | 1.00714   | -1.0034 | 1.25  | 4.08  | 0.359 | 0   | 1  | 31 | 104 | 2 | 0 | 1 |
| Q5V6N0_HALMA | 1 | Putative permease | pNG7110 | pNG7110 | 318 | 52.8 | 13 | 36 | 1      | K | RLNLDMPDPTDSDLDTAIENSEATTTR | A | 3 | 3037.3833 | 3039.4233 | 2.039777  | -2.0067 | 10.96 | 4.899 | 0.422 | 0   | 1  | 29 | 104 | 2 | 0 | 1 |
| Q5V6N0_HALMA | 1 | Putative permease | pNG7110 | pNG7110 | 318 | 52.8 | 13 | 36 | 1      | K | RLNLDMPDPTDSDLDTAIENSEATTTR | A | 3 | 3021.3833 | 3021.385  | 0.001707  | 0       | 0.56  | 6.319 | 0.567 | 0   | 1  | 38 | 104 | 2 | 0 | 1 |
| Q5V6N0_HALMA | 1 | Putative permease | pNG7110 | pNG7110 | 318 | 52.8 | 13 | 36 | 1      | K | RLNLDMPDPTDSDLDTAIENSEATTTR | A | 3 | 3021.3833 | 3021.3924 | 0.009032  | 0       | 2.99  | 6.5   | 0.574 | 0   | 1  | 37 | 104 | 2 | 0 | 1 |
| Q5V6N0_HALMA | 1 | Putative permease | pNG7110 | pNG7110 | 318 | 52.8 | 13 | 36 | 1      | R | SIYRDYIGEPDKER              | D | 3 | 1739.8478 | 1739.8454 | -0.002404 | 0       | -1.38 | 4.43  | 0.341 | 0   | 2  | 27 | 52  | 2 | 2 | 1 |
| Q5V6N0_HALMA | 1 | Putative permease | pNG7110 | pNG7110 | 318 | 52.8 | 13 | 36 | 0.9538 | R | SIYRDYIGEPDKER              | D | 4 | 1739.8478 | 1739.8478 | 0.000024  | 0       | 0.01  | 1.883 | 0.117 | 2.7 | 68 | 28 | 78  | 2 | 2 | 1 |
| Q5V6N0_HALMA | 1 | Putative permease | pNG7110 | pNG7110 | 318 | 52.8 | 13 | 36 | 1      | R | SPESADPVSGYR                | D | 2 | 1263.5731 | 1263.5654 | -0.007676 | 0       | -6.07 | 3.789 | 0.309 | 0   | 1  | 17 | 22  | 2 | 0 | 1 |
| Q5V6N0_HALMA | 1 | Putative permease | pNG7110 | pNG7110 | 318 | 52.8 | 13 | 36 | 0.9999 | R | SPESADPVSGYRDLRL            | S | 4 | 1803.8864 | 1803.8863 | -0.000124 | 0       | -0.07 | 2.904 | 0.312 | 0   | 18 | 30 | 90  | 2 | 2 | 1 |
| Q5V6N0_HALMA | 1 | Putative permease | pNG7110 | pNG7110 | 318 | 52.8 | 13 | 36 | 0.9991 | R | SPESADPVSGYRDLRL            | S | 3 | 1803.8864 | 1803.8847 | -0.001698 | 0       | -0.94 | 2.631 | 0.29  | 0.3 | 11 |    |     |   |   |   |











































|              |   |                                |             |          |     |      |   |    |        |   |                              |   |   |           |           |           |         |       |       |       |     |    |    |     |   |   |   |
|--------------|---|--------------------------------|-------------|----------|-----|------|---|----|--------|---|------------------------------|---|---|-----------|-----------|-----------|---------|-------|-------|-------|-----|----|----|-----|---|---|---|
| Q5UYW3_HALMA | 1 | Ribonuclease BN                | <i>rbn</i>  | rmAC2782 | 379 | 20.1 | 3 | 14 | 1      | R | DTDTLTDEELQELREEFESFREDIEGR  | T | 3 | 3300.4906 | 3300.4912 | 0.000609  | 0       | 0.18  | 3.82  | 0.378 | 0   | 1  | 28 | 104 | 2 | 2 | 1 |
| Q5UYW3_HALMA | 1 | Ribonuclease BN                | <i>rbn</i>  | rmAC2782 | 379 | 20.1 | 3 | 14 | 1      | R | DTDTLTDEELQELREEFESFREDIEGR  | T | 3 | 3300.4906 | 3300.4971 | 0.006468  | 0       | 1.96  | 3.867 | 0.314 | 0   | 1  | 28 | 104 | 2 | 2 | 1 |
| Q5UYW3_HALMA | 1 | Ribonuclease BN                | <i>rbn</i>  | rmAC2782 | 379 | 20.1 | 3 | 14 | 1      | R | DTDTLTDEELQELREEFESFREDIEGR  | T | 3 | 3300.4906 | 3300.4938 | 0.003172  | 0       | 0.96  | 3.894 | 0.394 | 0   | 2  | 28 | 104 | 2 | 2 | 1 |
| Q5UYW3_HALMA | 1 | Ribonuclease BN                | <i>rbn</i>  | rmAC2782 | 379 | 20.1 | 3 | 14 | 0.9924 | R | DTDTLTDEELQELREEFESFREDIEGR  | T | 4 | 3300.4906 | 3300.4946 | 0.003952  | 0       | 1.20  | 2.199 | 0.067 | 1   | 2  | 39 | 156 | 2 | 2 | 1 |
| Q5UYW3_HALMA | 1 | Ribonuclease BN                | <i>rbn</i>  | rmAC2782 | 379 | 20.1 | 3 | 14 | 0.99   | R | DTDTLTDEELQELREEFESFREDIEGR  | T | 4 | 3300.4906 | 3301.4909 | 1.000271  | -1.0034 | -0.93 | 2.065 | 0.09  | 5.5 | 1  | 36 | 156 | 2 | 2 | 1 |
| Q5UYW3_HALMA | 1 | Ribonuclease BN                | <i>rbn</i>  | rmAC2782 | 379 | 20.1 | 3 | 14 | 0.9544 | R | DTDTLTDEELQELREEFESFREDIEGR  | T | 4 | 3300.4906 | 3301.4909 | 1.000271  | -1.0034 | -0.93 | 2.015 | 0.049 | 8   | 2  | 37 | 156 | 2 | 2 | 1 |
| Q5UYW3_HALMA | 1 | Ribonuclease BN                | <i>rbn</i>  | rmAC2782 | 379 | 20.1 | 3 | 14 | 1      | R | IVTAAAGDVLTPAASTLLEDALTSAGGR | G | 2 | 2569.3599 | 2569.3634 | 0.00344   | 0       | 1.34  | 4.831 | 0.534 | 0   | 1  | 34 | 104 | 2 | 0 | 1 |
| Q5UYW3_HALMA | 1 | Ribonuclease BN                | <i>rbn</i>  | rmAC2782 | 379 | 20.1 | 3 | 14 | 1      | R | IVTAAAGDVLTPAASTLLEDALTSAGGR | G | 2 | 2569.3599 | 2569.3687 | 0.008824  | 0       | 3.43  | 5.628 | 0.643 | 0   | 1  | 29 | 52  | 2 | 0 | 1 |
| Q5UYW3_HALMA | 1 | Ribonuclease BN                | <i>rbn</i>  | rmAC2782 | 379 | 20.1 | 3 | 14 | 1      | R | IVTAAAGDVLTPAASTLLEDALTSAGGR | G | 3 | 2569.3599 | 2569.3615 | 0.001609  | 0       | 0.63  | 4.08  | 0.48  | 0   | 1  | 27 | 104 | 2 | 0 | 1 |
| Q5UYW3_HALMA | 1 | Ribonuclease BN                | <i>rbn</i>  | rmAC2782 | 379 | 20.1 | 3 | 14 | 1      | R | IVTAAAGDVLTPAASTLLEDALTSAGGR | G | 2 | 2569.3599 | 2570.3654 | 1.005524  | -1.0034 | 0.85  | 5.582 | 0.642 | 0   | 1  | 28 | 52  | 2 | 0 | 1 |
| Q5UYW3_HALMA | 1 | Ribonuclease BN                | <i>rbn</i>  | rmAC2782 | 379 | 20.1 | 3 | 14 | 1      | R | IVTAAAGDVLTPAASTLLEDALTSAGGR | G | 3 | 2569.3599 | 2569.3615 | 0.001609  | 0       | 0.63  | 4.861 | 0.54  | 0   | 1  | 32 | 104 | 2 | 0 | 1 |
| Q5V0P9_HALMA | 1 | Protease IV-like (EC 3.4.21.-) | <i>sppA</i> | rmAC2047 | 319 | 22.6 | 5 | 14 | 0.9993 | K | DSLREDIEVLQR                 | S | 2 | 1471.763  | 1471.7655 | 0.002453  | 0       | 1.67  | 3.094 | 0.242 | 0.1 | 1  | 16 | 22  | 2 | 1 | 1 |
| Q5V0P9_HALMA | 1 | Protease IV-like (EC 3.4.21.-) | <i>sppA</i> | rmAC2047 | 319 | 22.6 | 5 | 14 | 0.9993 | K | DSLREDIEVLQR                 | S | 2 | 1471.763  | 1471.7643 | 0.001232  | 0       | 0.84  | 3.381 | 0.208 | 0.1 | 1  | 17 | 22  | 2 | 1 | 1 |
| Q5V0P9_HALMA | 1 | Protease IV-like (EC 3.4.21.-) | <i>sppA</i> | rmAC2047 | 319 | 22.6 | 5 | 14 | 0.9975 | K | DSLREDIEVLQR                 | S | 2 | 1471.763  | 1471.7647 | 0.00172   | 0       | 1.17  | 3.23  | 0.16  | 0.1 | 1  | 16 | 22  | 2 | 1 | 1 |
| Q5V0P9_HALMA | 1 | Protease IV-like (EC 3.4.21.-) | <i>sppA</i> | rmAC2047 | 319 | 22.6 | 5 | 14 | 0.9973 | K | DSLREDIEVLQR                 | S | 3 | 1471.763  | 1471.7624 | -0.000582 | 0       | -0.40 | 3.95  | 0.141 | 0.4 | 28 | 25 | 44  | 2 | 1 | 1 |
| Q5V0P9_HALMA | 1 | Protease IV-like (EC 3.4.21.-) | <i>sppA</i> | rmAC2047 | 319 | 22.6 | 5 | 14 | 0.9616 | K | DSLREDIEVLQR                 | S | 3 | 1471.763  | 1471.7616 | -0.001406 | 0       | -0.96 | 3.855 | 0.039 | 0.8 | 20 | 26 | 44  | 2 | 1 | 1 |
| Q5V0P9_HALMA | 1 | Protease IV-like (EC 3.4.21.-) | <i>sppA</i> | rmAC2047 | 319 | 22.6 | 5 | 14 | 0.9999 |   |                              |   |   |           |           |           |         |       |       |       |     |    |    |     |   |   |   |







|              |   |                                             |          |          |     |      |   |    |        |   |                                     |   |   |           |           |           |         |       |       |       |     |    |    |     |   |   |   |                     |
|--------------|---|---------------------------------------------|----------|----------|-----|------|---|----|--------|---|-------------------------------------|---|---|-----------|-----------|-----------|---------|-------|-------|-------|-----|----|----|-----|---|---|---|---------------------|
| Q5V3Y7_HALMA | 1 | Hypothetical protein                        | rmAC0776 | rmAC0776 | 161 | 55.9 | 5 | 12 | 1      | R | ALSDRETILVHDHVEFELPGGPLGR           | A | 4 | 2643.3405 | 2643.3417 | 0.00122   | 0       | 0.46  | 3.401 | 0.35  | 0   | 1  | 43 | 138 | 2 | 1 | 1 |                     |
| Q5V3Y7_HALMA | 1 | Hypothetical protein                        | rmAC0776 | rmAC0776 | 161 | 55.9 | 5 | 12 | 1      | R | ALSDRETILVHDHVEFELPGGPLGR           | A | 4 | 2643.3405 | 2643.3413 | 0.000732  | 0       | 0.28  | 3.445 | 0.385 | 0   | 1  | 44 | 138 | 2 | 1 | 1 |                     |
| Q5V3Y7_HALMA | 1 | Hypothetical protein                        | rmAC0776 | rmAC0776 | 161 | 55.9 | 5 | 12 | 0.9999 | R | ALSDRETILVHDHVEFELPGGPLGR           | A | 5 | 2643.3405 | 2643.3373 | -0.003188 | 0       | -1.21 | 3.15  | 0.225 | 0.1 | 1  | 47 | 184 | 2 | 1 | 1 |                     |
| Q5V3Y7_HALMA | 1 | Hypothetical protein                        | rmAC0776 | rmAC0776 | 161 | 55.9 | 5 | 12 | 0.998  | R | ALSDRETILVHDHVEFELPGGPLGR           | A | 5 | 2643.3405 | 2643.3355 | -0.005019 | 0       | -1.90 | 2.694 | 0.234 | 0.5 | 25 | 42 | 184 | 2 | 1 | 1 |                     |
| Q5V3Y7_HALMA | 1 | Hypothetical protein                        | rmAC0776 | rmAC0776 | 161 | 55.9 | 5 | 12 | 0.9974 | R | ALSDRETILVHDHVEFELPGGPLGR           | A | 5 | 2643.3405 | 2643.3407 | 0.000169  | 0       | 0.06  | 2.715 | 0.168 | 0.4 | 9  | 43 | 184 | 2 | 1 | 1 |                     |
| Q5V3Y7_HALMA | 1 | Hypothetical protein                        | rmAC0776 | rmAC0776 | 161 | 55.9 | 5 | 12 | 1      | R | ETLTVHDHVEFELPGGPLGR                | A | 3 | 2101.0592 | 2101.0583 | -0.000914 | 0       | -0.44 | 4.459 | 0.276 | 0   | 1  | 35 | 72  | 2 | 0 | 1 |                     |
| Q5V3Y7_HALMA | 1 | Hypothetical protein                        | rmAC0776 | rmAC0776 | 161 | 55.9 | 5 | 12 | 1      | K | FHATGDGLVALTPDWMNIR                 | I | 3 | 2113.0415 | 2113.0422 | 0.000673  | 0       | 0.32  | 3.688 | 0.326 | 0   | 1  | 33 | 72  | 2 | 0 | 1 |                     |
| Q5V3Y7_HALMA | 1 | Hypothetical protein                        | rmAC0776 | rmAC0776 | 161 | 55.9 | 5 | 12 | 1      | K | FHATGDGLVALTPDWMNIR                 | I | 3 | 2113.0415 | 2113.0384 | -0.003172 | 0       | -1.50 | 4.338 | 0.424 | 0   | 1  | 32 | 72  | 2 | 0 | 1 |                     |
| Q5V3Y7_HALMA | 1 | Hypothetical protein                        | rmAC0776 | rmAC0776 | 161 | 55.9 | 5 | 12 | 1      | R | IEAERPGDGEPPNPDELTAGSVVSSIKPFQGVPPR | Q | 4 | 3545.7638 | 3547.7709 | 2.007071  | -2.0067 | 0.10  | 5.312 | 0.431 | 0   | 1  | 49 | 198 | 2 | 1 | 1 |                     |
| Q5V3Y7_HALMA | 1 | Hypothetical protein                        | rmAC0776 | rmAC0776 | 161 | 55.9 | 5 | 12 | 1      | R | IEAERPGDGEPPNPDELTAGSVVSSIKPFQGVPPR | Q | 4 | 3545.7638 | 3545.7582 | -0.005576 | 0       | -1.57 | 5.242 | 0.448 | 0   | 1  | 51 | 198 | 2 | 1 | 1 |                     |
| Q5V4K8_HALMA | 1 | Putative sec-independent translocation prot | rmAC0524 | rmAC0524 | 90  | 56.7 | 3 | 12 | 1      | K | GREEVEQEELEEMR                      | D | 2 | 1648.7413 | 1648.7351 | -0.006243 | 0       | -3.79 | 2.806 | 0.431 | 0   | 1  | 18 | 24  | 2 | 1 | 1 | GREEVEQEELEEM[147]R |
| Q5V4K8_HALMA | 1 | Putative sec-independent translocation prot | rmAC0524 | rmAC0524 | 90  | 56.7 | 3 | 12 | 1      | K | GREEVEQEELEEMR                      | D | 2 | 1648.7413 | 1648.7369 | -0.004425 | 0       | -2.68 | 4.125 | 0.304 | 0   | 1  | 25 | 48  | 2 | 1 | 1 | GREEVEQEELEEM[147]R |
| Q5V4K8_HALMA | 1 | Putative sec-independent translocation prot | rmAC0524 | rmAC0524 | 90  | 56.7 | 3 | 12 | 1      | K | GREEVEQEELEEMR                      | D | 2 | 1648.7413 | 1648.7336 | -0.007721 | 0       | -4.68 | 4.026 | 0.306 | 0   | 1  | 26 | 48  | 2 | 1 | 1 | GREEVEQEELEEM[147]R |
| Q5V4K8_HALMA | 1 | Putative sec-independent translocation prot | rmAC0524 | rmAC0524 | 90  | 56.7 | 3 | 12 | 1      | K | GREEVEQEELEEMR                      | D | 2 | 1632.7413 | 1632.7373 | -0.004045 | 0       | -2.48 | 4.934 | 0.379 | 0   | 1  | 20 | 24  | 2 | 1 | 1 |                     |
| Q5V4K8_HALMA | 1 | Putative sec-independent translocation prot | rmAC0524 | rmAC0524 | 90  | 56.7 | 3 | 12 | 1      | K | GREEVEQEELEEMR                      | D | 2 | 1648.7413 | 1648.7334 | -0.007904 | 0       | -4.79 | 3.881 | 0.28  | 0   | 1  | 28 | 48  | 2 | 1 | 1 | GREEVEQEELEEM[147]R |
| Q5V4K8_HALMA | 1 | Putative sec-independent translocation prot | rmAC0524 | rmAC0524 | 90  | 56.7 | 3 | 12 | 1      | K | GREEVEQEELEEMR                      | D | 2 | 1632.7413 | 1632.7405 | -0.000872 | 0       | -0.53 | 4.921 | 0.399 | 0   | 1  | 20 | 24  | 2 | 1 | 1 |                     |
| Q5V4K8_HALMA | 1 | Putative sec-independent translocation prot | rmAC0524 | rmAC0524 | 90  |      |   |    |        |   |                                     |   |   |           |           |           |         |       |       |       |     |    |    |     |   |   |   |                     |









|              |   |                                                       |          |          |     |      |   |   |        |   |                                       |   |   |           |           |           |         |         |       |       |     |    |    |     |   |   |   |
|--------------|---|-------------------------------------------------------|----------|----------|-----|------|---|---|--------|---|---------------------------------------|---|---|-----------|-----------|-----------|---------|---------|-------|-------|-----|----|----|-----|---|---|---|
| Q5UXZ5_HALMA | 1 | Ubiquinone/menaquinone biosynthesis methyltransferase | ubiE1    | rmAC3151 | 206 | 18.9 | 2 | 8 | 0.9999 | K | AGYEEFEHHIQSRPGSPR                    | A | 4 | 2224.041  | 2224.0368 | -0.004212 | 0       | -1.89   | 2.952 | 0.298 | 0.1 | 7  | 30 | 108 | 2 | 0 | 1 |
| Q5UXZ5_HALMA | 1 | Ubiquinone/menaquinone biosynthesis methyltransferase | ubiE1    | rmAC3151 | 206 | 18.9 | 2 | 8 | 0.9994 | K | AGYEEFEHHIQSRPGSPR                    | A | 4 | 2224.041  | 2224.0358 | -0.005188 | 0       | -2.33   | 3.126 | 0.201 | 0   | 9  | 29 | 108 | 2 | 0 | 1 |
| Q5UXZ5_HALMA | 1 | Ubiquinone/menaquinone biosynthesis methyltransferase | ubiE1    | rmAC3151 | 206 | 18.9 | 2 | 8 | 0.9732 | K | AGYEEFEHHIQSRPGSPR                    | A | 4 | 2224.041  | 2224.041  | -0.000061 | 0       | -0.03   | 2.056 | 0.058 | 0.5 | 12 | 28 | 108 | 2 | 0 | 1 |
| Q5UXZ5_HALMA | 1 | Ubiquinone/menaquinone biosynthesis methyltransferase | ubiE1    | rmAC3151 | 206 | 18.9 | 2 | 8 | 1      | K | MADAIMLFYDEEEADRMFTK                  | A | 3 | 2425.064  | 2426.0782 | 1.014147  | -1.0034 | 4.45    | 3.377 | 0.328 | 0   | 1  | 26 | 76  | 2 | 1 | 1 |
| Q5UXZ5_HALMA | 1 | Ubiquinone/menaquinone biosynthesis methyltransferase | ubiE1    | rmAC3151 | 206 | 18.9 | 2 | 8 | 1      | K | MADAIMLFYDEEEADRMFTK                  | A | 3 | 2425.064  | 2425.064  | -0.000038 | 0       | -0.02   | 3.555 | 0.383 | 0   | 1  | 29 | 76  | 2 | 1 | 1 |
| Q5UYK0_HALMA | 1 | Hypothetical protein                                  | rmAC2913 | rmAC2913 | 337 | 13.4 | 4 | 8 | 1      | R | GYLLTNAAEGLAGWIGK                     | R | 3 | 1732.9148 | 1732.9081 | -0.006721 | 0       | -3.88   | 3.946 | 0.341 | 0   | 1  | 33 | 64  | 2 | 0 | 1 |
| Q5UYK0_HALMA | 1 | Hypothetical protein                                  | rmAC2913 | rmAC2913 | 337 | 13.4 | 4 | 8 | 1      | R | GYLLTNAAEGLAGWIGK                     | R | 2 | 1732.9148 | 1733.9254 | 1.010624  | -1.0034 | 4.20    | 5.221 | 0.519 | 0   | 1  | 26 | 32  | 2 | 0 | 1 |
| Q5UYK0_HALMA | 1 | Hypothetical protein                                  | rmAC2913 | rmAC2913 | 337 | 13.4 | 4 | 8 | 0.9999 | R | GYLLTNAAEGLAGWIGK                     | R | 3 | 1732.9148 | 1732.8982 | -0.016653 | 0       | -9.61   | 3.165 | 0.242 | 0.2 | 1  | 26 | 64  | 2 | 0 | 1 |
| Q5UYK0_HALMA | 1 | Hypothetical protein                                  | rmAC2913 | rmAC2913 | 337 | 13.4 | 4 | 8 | 0.9965 | M | VRSDFIMEIRR                           | Y | 3 | 1420.7609 | 1420.7602 | -0.000771 | 0       | -0.54   | 3.925 | 0.261 | 0   | 2  | 22 | 40  | 2 | 1 | 1 |
| Q5UYM2_HALMA | 1 | Hypothetical protein                                  | rmAC2884 | rmAC2884 | 185 | 44.9 | 4 | 8 | 0.9998 | M | VDYTTPVTTAFEMQR                       | A | 2 | 1757.8294 | 1757.8264 | -0.003034 | 0       | -1.73   | 3.254 | 0.402 | 0   | 1  | 19 | 28  | 2 | 0 | 1 |
| Q5UYM2_HALMA | 1 | Hypothetical protein                                  | rmAC2884 | rmAC2884 | 185 | 44.9 | 4 | 8 | 1      | K | ALEQSVSFQQNVSNAVIDSLDTQESAQRR         | G | 3 | 3219.5756 | 3220.5682 | 0.992547  | -1.0034 | -3.36   | 5.106 | 0.51  | 0   | 1  | 43 | 112 | 2 | 0 | 1 |
| Q5UYM2_HALMA | 1 | Hypothetical protein                                  | rmAC2884 | rmAC2884 | 185 | 44.9 | 4 | 8 | 1      | K | ALEQSVSFQQNVSNAVIDSLDTQESAQRR         | G | 3 | 3219.5756 | 3220.5682 | 0.992547  | -1.0034 | -3.36   | 4.65  | 0.492 | 0   | 1  | 41 | 112 | 2 | 0 | 1 |
| Q5UYM2_HALMA | 1 | Hypothetical protein                                  | rmAC2884 | rmAC2884 | 185 | 44.9 | 4 | 8 | 1      | K | ALEQSVSFQQNVSNAVIDSLDTQESAQRR         | G | 3 | 3219.5756 | 3219.5707 | -0.004924 | 0       | -1.53   | 4.964 | 0.496 | 0   | 1  | 45 | 112 | 2 | 0 | 1 |
| Q5UYM2_HALMA | 1 | Hypothetical protein                                  | rmAC2884 | rmAC2884 | 185 | 44.9 | 4 | 8 | 1      | R | ATIEQSQKALEQSVSFQQNVSNAVIDSLDTQESAQRR | G | 4 | 4105.0312 | 4107.0509 | 2.019671  | -2.0067 | 3.16    | 5.23  | 0.466 | 0   | 1  | 48 | 216 | 2 | 1 | 1 |
| Q5UYM2_HALMA | 1 | Hypothetical protein                                  | rmAC2884 | rmAC2884 | 185 | 44.9 | 4 | 8 | 0.9986 | R | ATIEQSQKALEQSVSFQQNVSNAVIDSLDTQESAQRR | G | 4 | 4105.0312 | 4105.0422 | 0.01096   | 0       | 2.67    | 4.04  | 0.095 | 0.1 | 1  | 47 | 216 | 2 | 1 | 1 |
| Q5UYM2_HALMA | 1 | Hypothetical protein                                  | rmAC2884 | rmAC2884 | 185 | 44.9 | 4 | 8 | 1      | R | GVELQQTAFHSYLDAMASTMPGMTETVEQIR       | E | 3 | 3440.605  | 3440.6079 | 0.002908  | 0       | 0.85    | 4.298 | 0.383 | 0   | 1  | 41 | 120 | 2 | 0 | 1 |
| Q5UYM2_HALMA | 1 | Hypothetical protein                                  | rmAC2884 | rmAC2884 | 185 | 44.9 | 4 | 8 | 0.9936 | M | VDYTTPVTTAFEMQR                       | A | 3 | 1757.8294 | 1758.8182 | 0.988747  | -1.0034 | -8.31   | 2.605 | 0.344 | 0   | 4  | 22 | 56  | 2 | 0 | 1 |
| Q5UYM4_HALMA | 1 | MacC family protein                                   | maoC1    | rmAC2882 | 247 | 27.1 | 5 | 8 | 1      | R | NPLLDTWTWTSHHMFNSVVAANR               | A | 3 | 2589.2282 | 2589.2248 | -0.00341  | 0       | -1.32   | 4.592 | 0.504 | 0   | 1  | 35 | 88  | 2 | 0 | 1 |
| Q5UYM4_HALMA | 1 | MacC family protein                                   | maoC1    | rmAC2882 | 247 | 27.1 | 5 | 8 | 0.9998 | R | IAHGTLVGSLISAALAR                     | L | 3 | 1648.9624 | 1648.9614 | -0.001038 | 0       | -0.63   | 3.591 | 0.239 | 0.6 | 14 | 25 | 64  | 2 | 0 | 1 |
| Q5UYM4_HALMA | 1 | MacC family protein                                   | maoC1    | rmAC2882 | 247 | 27.1 | 5 | 8 | 0.9998 | R | IAHGTLVGSLISAALAR                     | L | 3 | 1648.9624 | 1648.9597 | -0.002686 | 0       | -1.63   | 3.857 | 0.232 | 0.4 | 44 | 24 | 64  | 2 | 0 | 1 |
| Q5UYM4_HALMA | 1 | MacC family protein                                   | maoC1    | rmAC2882 | 247 | 27.1 | 5 | 8 | 0.9978 | R | IAHGTLVGSLISAALAR                     | L | 3 | 1648.9624 | 1648.9614 | -0.001038 | 0       | -0.63   | 3.132 | 0.179 | 1.3 | 15 | 25 | 64  | 2 | 0 | 1 |
| Q5UYM4_HALMA | 1 | MacC family protein                                   | maoC1    | rmAC2882 | 247 | 27.1 | 5 | 8 | 0.9991 | R | IEPDEDLPEWHVHSIEEHPGR                 | L | 4 | 2470.1401 | 2470.1831 | 0.042929  | 0       | 17.38   | 1.529 | 0.127 | 4.6 | 1  | 38 | 120 | 2 | 0 | 1 |
| Q5UYM4_HALMA | 1 | MacC family protein                                   | maoC1    | rmAC2882 | 247 | 27.1 | 5 | 8 | 1      | D | TWETSSHMFNSVVAANR                     | A | 2 | 2036.9374 | 2037.6454 | 0.708024  | -1.0034 | -144.99 | 5.195 | 0.565 | 0   | 1  | 22 | 34  | 1 | 0 | 1 |
| Q5UYU6_HALMA | 1 | Hypothetical protein                                  | rmAC2801 | rmAC2801 | 301 | 15.9 | 3 | 8 | 1      | R | TPVPDVVAEFAQAVR                       | A | 3 | 1599.862  | 1600.8658 | 1.003781  | -1.0034 | 0.27    | 5.105 | 0.367 | 0   | 1  | 35 | 56  | 2 | 0 | 1 |
| Q5UYU6_HALMA | 1 | Hypothetical protein                                  | rmAC2801 | rmAC2801 | 301 | 15.9 | 3 | 8 | 0.9987 | R | LRLEAAERDRVEAFAGK                     | A | 4 | 1930.0384 | 1930.0377 | -0.000757 | 0       | -0.39   | 2.766 | 0.255 | 0.1 | 2  | 34 | 96  | 2 | 3 | 1 |
| Q5UYU6_HALMA | 1 | Hypothetical protein                                  | rmAC2801 | rmAC2801 | 301 | 15.9 | 3 | 8 | 0.9963 | - | MATLDRQSADEELTGQ                      | - | 2 | 1763.7996 | 1764.8054 | 1.005824  | -1.0034 | 1.40    | 3.267 | 0.235 | 0.4 | 1  | 17 | 30  | 2 | 1 | 1 |
| Q5UYU6_HALMA | 1 | Hypothetical protein                                  | rmAC2801 | rmAC2801 | 301 | 15.9 | 3 | 8 | 1      | R | TPVPDVVAEFAQAVR                       | A | 3 | 1599.862  | 1599.8604 | -0.001651 | 0       | -1.03   | 3.471 | 0.243 | 0   | 1  | 32 | 56  | 2 | 0 | 1 |
| Q5UYU6_HALMA | 1 | Hypothetical protein                                  | rmAC2801 | rmAC2801 | 301 | 15.9 | 3 | 8 | 1      | R | TPVPDVVAEFAQAVR                       | A | 3 | 1599.862  | 1599.8646 | 0.002561  | 0       | 1.60    | 5.042 | 0.333 | 0   | 1  | 35 | 56  | 2 | 0 | 1 |
| Q5UYU6_HALMA | 1 | Hypothetical protein                                  | rmAC2801 | rmAC2801 | 301 | 15.9 | 3 | 8 | 0.999  | R | TPVPDVVAEFAQAVR                       | A | 3 | 1599.862  | 1599.8628 | 0.00073   | 0       | 0.46    | 2.554 | 0.201 | 0.8 | 1  | 27 | 56  | 2 | 0 | 1 |
| Q5UZQ0_HALMA | 1 | Hypothetical protein                                  | rmAC2444 | rmAC2444 | 744 | 11.4 | 4 | 8 | 0.9995 | R | ILALLATALAIGAPLR                      | T | 3 | 1576.0076 | 1578.0082 | 2.000547  | -2.0067 | -3.90   | 3.382 | 0.158 | 0.1 | 1  | 23 | 60  | 2 | 0 | 1 |
| Q5UZQ0_HALMA | 1 | Hypothetical protein                                  | rmAC2444 | rmAC2444 | 744 | 11.4 | 4 | 8 | 1      | R | AVLEQLAAIIVVPAALSQVPITR               | D | 3 | 2371.4202 | 2371.4188 | -0.001379 | 0       | -0.58   | 3.692 | 0.443 | 0   | 1  | 31 | 88  | 2 | 0 | 1 |
| Q5UZQ0_HALMA | 1 | Hypothetical protein                                  | rmAC2444 | rmAC2444 | 744 | 11.4 | 4 | 8 | 1      | R | AVLEQLAAIIVVPAALSQVPITR               | D | 3 | 2371.4202 | 2371.4218 | 0.001551  | 0       | 0.65    | 3.859 | 0.514 | 0   | 1  | 33 | 88  | 2 | 0 | 1 |
| Q5UZQ0_HALMA | 1 | Hypothetical protein                                  | rmAC2444 | rmAC2444 | 744 | 11.4 | 4 | 8 | 0.9999 | T | ILALLATALAIGAPLR                      | T | 3 | 1576.0076 | 1576.9882 | 0.980547  | -1.0034 | -14.47  | 2.758 | 0.273 | 0.2 | 2  | 21 | 60  | 2 | 0 | 1 |
| Q5UZQ0_HALMA | 1 | Hypothetical protein                                  | rmAC2444 | rmAC2444 | 744 | 11.4 | 4 | 8 | 1      | K | RPDAMTDSDGTERADDDDNIGDAGR             | A | 4 | 2820.1965 | 2820.1921 | -0.004438 | 0       | -1.57   | 3.77  | 0.284 | 0.1 | 1  | 46 | 150 | 2 | 1 | 1 |
| Q5UZQ0_HALMA | 1 | Hypothetical protein                                  | rmAC2444 | rmAC2444 | 744 | 11.4 | 4 | 8 | 0.9996 | K | RPDAMTDSDGTERADDDDNIGDAGR             | A | 4 | 2820.1965 | 2822.1735 | 1.977007  | -2.0067 | -10.53  | 3.562 | 0.216 | 0.2 | 1  | 43 | 150 | 2 | 1 | 1 |
| Q5UZQ0_HALMA | 1 | Hypothetical protein                                  | rmAC2444 | rmAC2444 | 744 | 11.4 | 4 | 8 | 0.9928 | T | TGPNRPFYDDQRLDSPPETR                  | T | 3 | 2270.0676 | 2270.0656 | -0.002051 | 0       | -0.90   | 2.775 | 0.171 | 0.1 | 1  | 25 | 76  | 2 | 1 | 1 |
| Q5V0I0_HALMA | 1 | Hypothetical protein                                  | rmAC2125 | rmAC2125 | 159 | 22.6 | 3 | 8 | 0.9928 | R | FGGWLAEQQGHPR                         | V | 3 | 1481.7164 | 1481.7108 | -0.005587 | 0       | -3.77   | 2.996 | 0.141 | 0.3 | 39 | 18 | 48  | 2 | 0 | 1 |
| Q5V0I0_HALMA | 1 | Hypothetical protein                                  | rmAC2125 | rmAC2125 | 159 | 22.6 | 3 | 8 | 1      | R | AGLGGVPALWSLK                         | E | 2 | 1380.8129 | 1380.8106 | -0.002281 | 0       | -1.65   | 3.289 | 0.425 | 0   | 1  | 19 | 26  | 2 | 0 | 1 |
| Q5V0I0_HALMA | 1 | Hypothetical protein                                  | rmAC2125 | rmAC2125 | 159 | 22.6 | 3 | 8 | 1      | R | AGLGGVPALWSLK                         | E | 2 | 1380.8129 | 1380.8105 | -0.002403 | 0       | -1.74   | 3.251 | 0.443 | 0   | 1  | 19 | 26  | 2 | 0 | 1 |
| Q5V0I0_HALMA | 1 | Hypothetical protein                                  | rmAC2125 | rmAC2125 | 159 | 22.6 | 3 | 8 | 1      | R | FGGWLAEQQGHPR                         | V | 2 | 1481.7164 | 1481.7157 | -0.000752 | 0       | -0.51   | 3.218 | 0.306 | 0   | 1  | 16 | 24  | 2 | 0 | 1 |
| Q5V0I0_HALMA | 1 | Hypothetical protein                                  | rmAC2125 | rmAC2125 | 159 | 22.6 | 3 | 8 | 1      | R | FGGWLAEQQGHPR                         | V | 3 | 1481.7164 | 1481.7155 | -0.000918 | 0       | -0.62   | 3.41  | 0.341 | 0   | 1  | 25 | 48  | 2 | 0 | 1 |
| Q5V0I0_HALMA | 1 | Hypothetical protein                                  | rmAC2125 | rmAC2125 | 159 | 22.6 | 3 | 8 | 1      | R | FGGWLAEQQGHPR                         | V | 2 | 1481.7164 | 1481.717  | 0.000591  | 0       | 0.40    | 2.939 | 0.387 | 0   | 1  | 17 | 24  | 2 | 0 | 1 |
| Q5V0I0_HALMA | 1 | Hypothetical protein                                  | rmAC2125 | rmAC2125 | 159 | 22.6 | 3 | 8 | 1      | R | FGGWLAEQQGHPR                         | V | 3 | 1481.7164 | 1481.7152 | -0.001192 | 0       | -0.80   | 3.225 | 0.327 | 0   | 1  | 25 | 48  | 2 | 0 | 1 |
| Q5V0I0_HALMA | 1 | Hypothetical protein                                  | rmAC2125 | rmAC2125 | 159 | 22.6 | 3 | 8 | 0.987  | A | MSLQFELSK                             | T | 2 | 1081.5478 | 1081.5411 | -0.006712 | 0       | -6.21   | 2.244 | 0.283 | 0.1 | 1  | 14 | 16  | 1 | 0 | 1 |
| Q5V2E6_HALMA | 1 | Halocyanin-like                                       | hcb6     | rmAC1377 | 258 | 9.7  | 1 | 8 | 1      | K | GAAHNVVAEDETFSNGSSASGTGVK             | F | 2 | 2391.0938 | 2392.0929 | 0.999045  | -1.0034 | -1.80   | 5.92  | 0.523 | 0   | 1  | 28 | 48  | 2 | 0 | 1 |
| Q5V2E6_HALMA | 1 | Halocyanin-like                                       | hcb6     | rmAC1377 | 258 | 9.7  | 1 | 8 | 1      | K | GAAHNVVAEDETFSNGSSASGTGVK             | F | 2 | 2391.0938 | 2391.0958 | 0.001975  | 0       | 0.83    | 3.913 | 0.243 | 0   | 1  | 22 | 48  | 2 | 0 | 1 |
| Q5V2E6_HALMA | 1 | Halocyanin-like                                       | hcb6     | rmAC1377 | 258 | 9.7  | 1 | 8 | 1      | K | GAAHNVVAEDETFSNGSSASGTGVK             | F | 3 | 2391.0938 | 2391.0913 | -0.002494 | 0       | -1.04   | 5.279 | 0.467 | 0   | 1  | 41 | 96  | 2 | 0 | 1 |
| Q5V2E6_HALMA | 1 | Halocyanin-like                                       | hcb6     | rmAC1377 | 258 | 9.7  | 1 | 8 | 1      | K | GAAHNVVAEDETFSNGSSASGTGVK             | F | 3 | 2391.0938 | 2391.0866 | -0.007255 | 0       | -3.03   | 5.034 | 0.458 | 0   | 1  | 38 | 96  | 2 | 0 | 1 |
| Q5V2E6_HALMA | 1 | Halocyanin-like                                       | hcb6     | rmAC1377 | 258 | 9.7  | 1 | 8 | 1      | F | GAAHNVVAEDETFSNGSSASGTGVK             | F | 3 | 2391.0938 | 2391.0919 | -0.001944 | 0       | -0.81   | 4.457 | 0.388 | 0   | 1  | 33 | 96  | 2 | 0 | 1 |
| Q5V2E6_HALMA | 1 | Halocyanin-like                                       | hcb6     | rmAC1377 | 258 | 9.7  | 1 | 8 | 1      | K | GAAHNVVAEDETFSNGSSASGTGVK             | F | 2 | 2391.0938 | 2391.0916 | -0.002175 | 0       | -0.91   | 5.297 | 0.541 | 0   | 1  | 29 | 48  | 2 | 0 | 1 |
| Q5V2E6_HALMA | 1 | Halocyanin-like                                       | hcb6     | rmAC1377 | 258 | 9.7  | 1 | 8 | 0.9999 | F | GAAHNVVAEDETFSNGSSASGTGVK             | F | 3 | 2391.0938 | 2391.0831 | -0.010734 | 0       | -4.4    |       |       |     |    |    |     |   |   |   |

|              |        |                                           |                 |          |     |      |   |   |        |   |                                     |           |           |             |           |           |         |         |       |       |     |    |    |     |   |   |   |
|--------------|--------|-------------------------------------------|-----------------|----------|-----|------|---|---|--------|---|-------------------------------------|-----------|-----------|-------------|-----------|-----------|---------|---------|-------|-------|-----|----|----|-----|---|---|---|
| Q5V515_HALMA | 1      | Thiamine-binding periplasmic protein-like | <i>tpaA</i>     | rmAC0147 | 374 | 12.8 | 4 | 8 | 1      | K | GSVSGWISDWER                        | Q         | 2         | 1377.6313   | 1377.6321 | 0.00073   | 0       | 0.53    | 2.622 | 0.353 | 0   | 1  | 16 | 22  | 2 | 0 | 1 |
| Q5V515_HALMA | 1      | Thiamine-binding periplasmic protein-like | <i>tpaA</i>     | rmAC0147 | 374 | 12.8 | 4 | 8 | 0.9999 | R | AFLLHTVK                            | Q         | 2         | 927.5542    | 927.5539  | -0.000356 | 0       | -0.38   | 2.546 | 0.257 | 0.2 | 1  | 13 | 14  | 2 | 0 | 1 |
| Q5V515_HALMA | 1      | Thiamine-binding periplasmic protein-like | <i>tpaA</i>     | rmAC0147 | 374 | 12.8 | 4 | 8 | 0.9987 | R | AFLLHTVK                            | Q         | 2         | 927.5542    | 927.5454  | -0.008776 | 0       | -9.46   | 2.014 | 0.211 | 0.6 | 1  | 13 | 14  | 2 | 0 | 1 |
| Q5V515_HALMA | 1      | Thiamine-binding periplasmic protein-like | <i>tpaA</i>     | rmAC0147 | 374 | 12.8 | 4 | 8 | 0.995  | R | AFLLHTVK                            | Q         | 2         | 927.5542    | 929.5654  | 2.011224  | -2.0067 | 4.88    | 2.676 | 0.111 | 1.1 | 1  | 13 | 14  | 2 | 0 | 1 |
| Q5V515_HALMA | 1      | Thiamine-binding periplasmic protein-like | <i>tpaA</i>     | rmAC0147 | 374 | 12.8 | 4 | 8 | 0.9984 | R | EFMGFLRLPEIQGEIAVR                  | N         | 3         | 2104.1139   | 2105.1134 | 0.99944   | -1.0034 | -1.86   | 2.616 | 0.261 | 1   | 49 | 19 | 68  | 2 | 0 | 1 |
| Q5V515_HALMA | 1      | Thiamine-binding periplasmic protein-like | <i>tpaA</i>     | rmAC0147 | 374 | 12.8 | 4 | 8 | 0.9998 | K | GSVSGWISDWER                        | Q         | 2         | 1377.6313   | 1377.6329 | 0.001584  | 0       | 1.15    | 2.463 | 0.281 | 0   | 1  | 15 | 22  | 2 | 0 | 1 |
| Q5V515_HALMA | 1      | Thiamine-binding periplasmic protein-like | <i>tpaA</i>     | rmAC0147 | 374 | 12.8 | 4 | 8 | 0.9999 | L | 1325.6                              | 1325.5882 | -0.011853 | 0           | -8.94     | 2.417     | 0.087   | 0.7     | 3     | 18    | 36  | 2  | 1  | 1   | 1 |   |   |
| Q5V6H4_HALMA | 1      | Hypothetical protein                      | <i>pNG7172</i>  | pNG7172  | 356 | 30.9 | 6 | 8 | 1      | K | AVTGVSVPVHHTIGLDGIAR                | L         | 4         | 1998.101    | 1998.0971 | -0.003909 | 0       | -1.96   | 2.526 | 0.198 | 1.5 | 1  | 35 | 114 | 2 | 0 | 1 |
| Q5V6H4_HALMA | 1      | Hypothetical protein                      | <i>pNG7172</i>  | pNG7172  | 356 | 30.9 | 6 | 8 | 1      | K | AVTGVSVPVHHTIGLDGIAR                | L         | 4         | 1998.101    | 1998.0999 | -0.001101 | 0       | -0.55   | 3.286 | 0.337 | 0   | 1  | 35 | 114 | 2 | 0 | 1 |
| Q5V6H4_HALMA | 1      | Hypothetical protein                      | <i>pNG7172</i>  | pNG7172  | 356 | 30.9 | 6 | 8 | 1      | R | GAWGEMVWDYSQLPDLR                   | H         | 2         | 2021.9305   | 2021.9286 | -0.001961 | 0       | -0.97   | 3.206 | 0.344 | 0   | 1  | 19 | 32  | 2 | 0 | 1 |
| Q5V6H4_HALMA | 1      | Hypothetical protein                      | <i>pNG7172</i>  | pNG7172  | 356 | 30.9 | 6 | 8 | 1      | S | 1799.9101                           | 1799.9093 | -0.000801 | 0           | -0.45     | 3.927     | 0.395   | 0       | 1     | 30    | 68  | 2  | 0  | 1   |   |   |   |
| Q5V6H4_HALMA | 1      | Hypothetical protein                      | <i>pNG7172</i>  | pNG7172  | 356 | 30.9 | 6 | 8 | 1      | R | VSVVGGGEAGLAAQLAEVTSVHLYDK          | E         | 3         | 2916.4869   | 2917.4782 | 0.991247  | -1.0034 | -4.15   | 5.165 | 0.488 | 0   | 1  | 36 | 112 | 2 | 0 | 1 |
| Q5V6I3_HALMA | 1      | Putative Mn transporter                   | <i>mntH</i>     | pNG7161  | 402 | 6.2  | 3 | 8 | 1      | R | LGLVSGEGLGEALR                      | G         | 2         | 1369.7565   | 1369.7558 | -0.000691 | 0       | -0.50   | 3.705 | 0.405 | 0   | 1  | 22 | 26  | 2 | 0 | 1 |
| Q5V6I3_HALMA | 1      | Putative Mn transporter                   | <i>mntH</i>     | pNG7161  | 402 | 6.2  | 3 | 8 | 1      | R | LGLVSGEGLGEALR                      | E         | 2         | 1369.7565   | 1370.1654 | 0.408924  | 0       | 298.54  | 2.79  | 0.375 | 0   | 1  | 19 | 26  | 2 | 0 | 1 |
| Q5V6I3_HALMA | 1      | Putative Mn transporter                   | <i>mntH</i>     | pNG7161  | 402 | 6.2  | 3 | 8 | 1      | R | LGLVSGEGLGEALR                      | E         | 2         | 1369.7565   | 1369.7654 | 0.008924  | 0       | 6.52    | 2.742 | 0.373 | 0   | 1  | 22 | 26  | 2 | 0 | 1 |
| Q5V6I3_HALMA | 1      | Putative Mn transporter                   | <i>mntH</i>     | pNG7161  | 402 | 6.2  | 3 | 8 | 0.9506 | R | LGLVSGEGLGEALR                      | E         | 2         | 1369.7565   | 1370.3254 | 0.568924  | -1.0034 | -317.16 | 1.69  | 0.204 | 0.9 | 6  | 14 | 26  | 2 | 0 | 1 |
| Q5V6I3_HALMA | 1      | Putative Mn transporter                   | <i>mntH</i>     | pNG7161  | 402 | 6.2  | 3 | 8 | 0.9929 | R | LGLVSGEGLGEALRER                    | F         | 2         | 1654.9002   | 1654.8993 | -0.000958 | 0       | -0.58   | 3.012 | 0.211 | 0.3 | 10 | 15 | 30  | 2 | 1 | 1 |
| Q5V6I3_HALMA | 1      | Putative Mn transporter                   | <i>mntH</i>     | pNG7161  | 402 | 6.2  | 3 | 8 | 0.9877 | R | LGLVSGEGLGEALRER                    | F         | 3         | 1654.9002   | 1654.8997 | -0.000544 | 0       | -0.33   | 2.045 | 0.212 | 0.2 | 1  | 25 | 60  | 2 | 1 | 1 |
| Q5V6R5_HALMA | 1      | Hypothetical protein                      | <i>pNG7069</i>  | pNG7069  | 135 | 44.4 | 3 | 8 | 0.9942 | R | GGLPGAMLGGLVGGTTGYVAGAAAK           | D         | 3         | 2145.1252   | 2146.1182 | 0.992947  | -1.0034 | -4.85   | 3.049 | 0.123 | 0.6 | 1  | 30 | 96  | 2 | 0 | 1 |
| Q5V6R5_HALMA | 1      | Hypothetical protein                      | <i>pNG7069</i>  | pNG7069  | 135 | 44.4 | 3 | 8 | 1      | M | ASEQHDATETPATPEPNAALSLVGGFVGTVSGLKR | R         | 3         | 3350.663    | 3350.6676 | 0.0046    | 0       | 1.37    | 5.648 | 0.487 | 0   | 1  | 44 | 132 | 2 | 0 | 1 |
| Q5V6R5_HALMA | 1      | Hypothetical protein                      | <i>pNG7069</i>  | pNG7069  | 135 | 44.4 | 3 | 8 | 0.99   | M | ASEQHDATETPATPEPNAALSLVGGFVGTVSGLKR | G         | 4         | 3506.7641   | 3506.7751 | 0.01097   | 0       | 3.13    | 3.078 | 0.257 | 0.1 | 3  | 40 | 204 | 2 | 0 | 1 |
| Q5V6R5_HALMA | 1      | Hypothetical protein                      | <i>pNG7069</i>  | pNG7069  | 135 | 44.4 | 3 | 8 | 0.98   | M | ASEQHDATETPATPEPNAALSLVGGFVGTVSGLKR | G         | 4         | 3506.7641   | 3506.7705 | 0.006331  | 0       | 1.81    | 3.172 | 0.183 | 0.1 | 1  | 40 | 204 | 2 | 0 | 1 |
| Q5V6R5_HALMA | 1      | Hypothetical protein                      | <i>pNG7069</i>  | pNG7069  | 135 | 44.4 | 3 | 8 | 1      | R | GGLPGAMLGGLVGGTTGYVAGAAAK           | D         | 3         | 2145.1252   | 2147.1382 | 2.012947  | -2.0067 | 2.91    | 5.036 | 0.556 | 0   | 1  | 39 | 96  | 2 | 0 | 1 |
| Q5V6R5_HALMA | 1      | Hypothetical protein                      | <i>pNG7069</i>  | pNG7069  | 135 | 44.4 | 3 | 8 | 1      | R | GGLPGAMLGGLVGGTTGYVAGAAAK           | D         | 2         | 2145.1252   | 2145.1273 | 0.002060  | 0       | 0.96    | 6.63  | 0.556 | 0   | 1  | 33 | 48  | 2 | 0 | 1 |
| Q5V6R5_HALMA | 1      | Hypothetical protein                      | <i>pNG7069</i>  | pNG7069  | 135 | 44.4 | 3 | 8 | 1      | R | GGLPGAMLGGLVGGTTGYVAGAAAK           | D         | 2         | 2145.1252   | 2145.1454 | 0.020224  | 0       | 9.43    | 3.569 | 0.552 | 0   | 1  | 18 | 48  | 2 | 0 | 1 |
| Q5V6S6_HALMA | 1      | Hypothetical protein                      | <i>pNG7058</i>  | pNG7058  | 166 | 22.3 | 3 | 8 | 1      | R | ADIGEWNNR                           | N         | 2         | 1145.5254   | 1145.5254 | 0.000024  | 0       | 0.02    | 2.936 | 0.292 | 0   | 1  | 15 | 16  | 2 | 0 | 1 |
| Q5V6S6_HALMA | 1      | Hypothetical protein                      | <i>pNG7058</i>  | pNG7058  | 166 | 22.3 | 3 | 8 | 0.9973 | R | ADIGEWNNR                           | N         | 2         | 1145.5254   | 1145.5257 | 0.000307  | 0       | 0.27    | 1.904 | 0.227 | 0.1 | 1  | 15 | 16  | 2 | 0 | 1 |
| Q5V6S6_HALMA | 1      | Hypothetical protein                      | <i>pNG7058</i>  | pNG7058  | 166 | 22.3 | 3 | 8 | 1      | R | SQNTDQLPVRVETLDAR                   | G         | 3         | 1940.9915   | 1940.9926 | 0.001112  | 0       | 0.57    | 3.992 | 0.465 | 0   | 1  | 31 | 64  | 2 | 1 | 1 |
| Q5V6S6_HALMA | 1      | Hypothetical protein                      | <i>pNG7058</i>  | pNG7058  | 166 | 22.3 | 3 | 8 | 1      | R | SQNTDQLPVRVETLDAR                   | G         | 3         | 1940.9915   | 1940.9934 | 0.001845  | 0       | 0.95    | 3.464 | 0.465 | 0   | 1  | 31 | 64  | 2 | 1 | 1 |
| Q5V6S6_HALMA | 1      | Hypothetical protein                      | <i>pNG7058</i>  | pNG7058  | 166 | 22.3 | 3 | 8 | 1      | R | SQNTDQLPVRVETLDAR                   | G         | 3         | 1940.9915   | 1940.9873 | -0.004198 | 0       | -2.16   | 3.163 | 0.432 | 0   | 1  | 30 | 64  | 2 | 1 | 1 |
| Q5V6S6_HALMA | 1      | Hypothetical protein                      | <i>pNG7058</i>  | pNG7058  | 166 | 22.3 | 3 | 8 | 0.9953 | R | SQNTDQLPVRVETLDAR                   | G         | 3         | 1940.9915   | 1940.9908 | -0.000719 | 0       | -0.37   | 2.8   | 0.221 | 1   | 12 | 20 | 64  | 2 | 1 | 1 |
| Q5V6Z0_HALMA | 1      | Putative metal ion permease               | <i>pNG6023</i>  | pNG6023  | 464 | 5.6  | 2 | 8 | 1      | K | RTFEEETFTNTQSPQISSHDDHDDH           | -         | 3         | 3119.3241   | 3120.318  | 0.993891  | -1.0034 | -3.03   | 4.022 | 0.351 | 0   | 1  | 30 | 100 | 2 | 0 | 1 |
| Q5V6Z0_HALMA | 1      | Putative metal ion permease               | <i>pNG6023</i>  | pNG6023  | 464 | 5.6  | 2 | 8 | 1      | K | RTFEEETFTNTQSPQISSHDDHDDH           | -         | 4         | 3119.3241   | 3119.3166 | -0.007526 | 0       | -2.41   | 4.891 | 0.332 | 0   | 6  | 36 | 150 | 2 | 0 | 1 |
| Q5V6Z0_HALMA | 1      | Putative metal ion permease               | <i>pNG6023</i>  | pNG6023  | 464 | 5.6  | 2 | 8 | 1      | K | RTFEEETFTNTQSPQISSHDDHDDH           | -         | 4         | 3119.3241   | 3119.3244 | 0.000286  | 0       | 0.09    | 4.279 | 0.298 | 0   | 1  | 40 | 150 | 2 | 0 | 1 |
| Q5V6Z0_HALMA | 1      | Putative metal ion permease               | <i>pNG6023</i>  | pNG6023  | 464 | 5.6  | 2 | 8 | 1      | R | TFFEEETFTNTQSPQISSHDDHDDH           | -         | 4         | 2963.223    | 2963.2165 | -0.006524 | 0       | -2.20   | 5     | 0.48  | 0   | 1  | 40 | 144 | 2 | 0 | 1 |
| Q5V6Z0_HALMA | 1      | Putative metal ion permease               | <i>pNG6023</i>  | pNG6023  | 464 | 5.6  | 2 | 8 | 1      | R | TFFEEETFTNTQSPQISSHDDHDDH           | -         | 4         | 2963.223    | 2963.2246 | 0.001533  | 0       | 0.52    | 5.473 | 0.482 | 0   | 1  | 43 | 144 | 2 | 0 | 1 |
| Q5V6Z0_HALMA | 1      | Putative metal ion permease               | <i>pNG6023</i>  | pNG6023  | 464 | 5.6  | 2 | 8 | 1      | R | TFFEEETFTNTQSPQISSHDDHDDH           | -         | 4         | 2963.223    | 2963.2172 | -0.005792 | 0       | -1.95   | 4.394 | 0.43  | 0   | 1  | 40 | 144 | 2 | 0 | 1 |
| Q5V844_HALMA | 1      | Hypothetical protein                      | <i>pNG2015</i>  | pNG2015  | 204 | 23   | 3 | 8 | 1      | R | VVYIDTSSDSSATLGR                    | W         | 2         | 1669.8159   | 1669.8152 | -0.000765 | 0       | -0.46   | 4.235 | 0.52  | 0   | 1  | 25 | 30  | 2 | 0 | 1 |
| Q5V844_HALMA | 1      | Hypothetical protein                      | <i>pNG2015</i>  | pNG2015  | 204 | 23   | 3 | 8 | 0.9991 | V | 3259.2783                           | 3259.2797 | 0.001422  | 0           | 0.56      | 3.372     | 0.218   | 0.2     | 1     | 26    | 96  | 2  | 2  | 1   |   |   |   |
| Q5V844_HALMA | 1      | Hypothetical protein                      | <i>pNG2015</i>  | pNG2015  | 204 | 23   | 3 | 8 | 1      | R | VVYIDTSSDSSATLGR                    | W         | 2         | 1669.8159   | 1669.8128 | -0.003084 | 0       | -1.85   | 3.835 | 0.489 | 0   | 1  | 23 | 30  | 2 | 0 | 1 |
| Q5V844_HALMA | 1      | Hypothetical protein                      | <i>pNG2015</i>  | pNG2015  | 204 | 23   | 3 | 8 | 1      | R | VVYIDTSSDSSATLGR                    | W         | 2         | 1669.8159   | 1669.8106 | -0.005281 | 0       | -3.16   | 3.351 | 0.458 | 0   | 1  | 24 | 30  | 2 | 0 | 1 |
| Q5V844_HALMA | 1      | Hypothetical protein                      | <i>pNG2015</i>  | pNG2015  | 204 | 23   | 3 | 8 | 0.9159 | R | VVYIDTSSDSSATLGR                    | W         | 2         | 1669.8159   | 1671.3454 | 1.529524  | -2.0067 | -285.77 | 2.029 | 0.196 | 0.5 | 10 | 13 | 30  | 2 | 0 | 1 |
| Q5V844_HALMA | 1      | Hypothetical protein                      | <i>pNG2015</i>  | pNG2015  | 204 | 23   | 3 | 8 | 1      | R | VVYIDTSSDSSATLGRWEGPDV              | -         | 2         | 2353.1074   | 2353.1097 | 0.002291  | 0       | 0.97    | 5.406 | 0.57  | 0   | 1  | 28 | 42  | 2 | 1 | 1 |
| Q5V844_HALMA | 1      | Hypothetical protein                      | <i>pNG2015</i>  | pNG2015  | 204 | 23   | 3 | 8 | 1      | R | VVYIDTSSDSSATLGRWEGPDV              | -         | 2         | 2353.1074   | 2353.1107 | 0.003268  | 0       | 1.39    | 5.38  | 0.549 | 0   | 1  | 25 | 42  | 2 | 1 | 1 |
| Q5V301_HALMA | 0.9984 | Hypothetical protein                      | <i>rmAC1150</i> | rmAC1150 | 257 | 7.4  | 2 | 8 | 0.9801 | R | SLPLVGDLFQR                         | L         | 2         | 1243.6924   | 1243.6913 | -0.001166 | 0       | -0.94   | 2.558 | 0.003 | 0.3 | 1  | 17 | 20  | 2 | 0 | 1 |
| Q5V301_HALMA | 0.9984 | Hypothetical protein                      | <i>rmAC1150</i> | rmAC1150 | 257 | 7.4  | 2 | 8 | 0.9136 | R | LSASLVAR                            | V         | 2         | 815.4865    | 815.4858  | -0.00071  | 0       | -0.87   | 1.869 | 0.048 | 1.2 | 3  | 11 | 14  | 2 | 0 | 1 |
| Q5V301_HALMA | 0.9984 | Hypothetical protein                      | <i>rmAC1150</i> | rmAC1150 | 257 | 7.4  | 2 | 8 | 1      | R | SLPLVGDLFQR                         | L         | 2         | 1243.6924   | 1243.6854 | -0.006976 | 0       | -5.61   | 2.764 | 0.313 | 0   | 1  | 14 | 20  | 2 | 0 | 1 |
| Q5V301_HALMA | 0.9984 | Hypothetical protein                      | <i>rmAC1150</i> | rmAC1150 | 257 | 7.4  | 2 | 8 | 1      | R | SLPLVGDLFQR                         | L         | 2         | 1243.6924   | 1243.6925 | 0.000055  | 0       | 0.04    | 2.794 | 0.329 | 0   | 1  | 16 | 20  | 2 | 0 | 1 |
| Q5V301_HALMA | 0.9984 | Hypothetical protein                      | <i>rmAC1150</i> | rmAC1150 | 257 | 7.4  | 2 | 8 | 1      | R | SLPLVGDLFQR                         | L         | 2         | 1243.6924   | 1243.691  | -0.00141  | 0       | -1.13   | 2.785 | 0.343 | 0   | 1  | 19 | 20  | 2 | 0 | 1 |
| Q5V301_HALMA | 0.9984 | Hypothetical protein                      | <i>rmAC1150</i> | rmAC1150 | 257 | 7.4  | 2 | 8 | 1      | R | SLPLVGDLFQR                         | L         | 2         | 1243.6924   | 1243.6928 | 0.000421  | 0       | 0.34    | 2.756 | 0.343 | 0   | 1  | 17 | 20  | 2 | 0 | 1 |
| Q5V301_HALMA | 0.9984 | Hypothetical protein                      | <i>rmAC1150</i> | rmAC1150 | 257 | 7.4  | 2 | 8 | 1      | R | SLPLVGDLFQR                         | L         | 2         | 1243.6924</ |           |           |         |         |       |       |     |    |    |     |   |   |   |

|              |   |                                                             |                 |          |     |      |   |   |        |   |                                        |   |   |           |           |           |         |        |       |       |     |     |    |     |   |   |   |
|--------------|---|-------------------------------------------------------------|-----------------|----------|-----|------|---|---|--------|---|----------------------------------------|---|---|-----------|-----------|-----------|---------|--------|-------|-------|-----|-----|----|-----|---|---|---|
| Q5V0N0_HALMA | 1 | Phytoene synthase (EC 2.5.1.32) (EC 2.5.1.21)               | <i>criB</i>     | rmAC2069 | 323 | 29.4 | 5 | 7 | 0.9904 | R | DVREDIHDYGR                            | V | 2 | 1373.6324 | 1373.63   | -0.002445 | 0       | -1.78  | 2.039 | 0.252 | 0   | 1   | 12 | 20  | 2 | 1 | 1 |
| Q5V0N0_HALMA | 1 | Phytoene synthase (EC 2.5.1.32) (EC 2.5.1.21)               | <i>criB</i>     | rmAC2069 | 323 | 29.4 | 5 | 7 | 0.9339 | R | GPGETPTDTHSHGQPTWRG                    | - | 4 | 2016.9038 | 2016.9018 | -0.002021 | 0       | -1.00  | 2.626 | 0.017 | 0.5 | 11  | 34 | 108 | 2 | 1 | 1 |
| Q5V0N0_HALMA | 1 | Phytoene synthase (EC 2.5.1.32) (EC 2.5.1.21)               | <i>criB</i>     | rmAC2069 | 323 | 29.4 | 5 | 7 | 1      | R | HGVTTEEQLADAEDVDFAVVMQEELARTDELYR      | E | 4 | 3805.7853 | 3807.8109 | 2.025571  | -2.0067 | 4.96   | 3.933 | 0.412 | 0   | 1   | 44 | 192 | 2 | 2 | 1 |
| Q5V0N0_HALMA | 1 | Phytoene synthase (EC 2.5.1.32) (EC 2.5.1.21)               | <i>criB</i>     | rmAC2069 | 323 | 29.4 | 5 | 7 | 0.9939 | R | RLWLLAR                                | T | 2 | 926.5814  | 926.5854  | 0.004024  | 0       | 4.34   | 2.396 | 0.066 | 0.8 | 2   | 41 | 12  | 2 | 0 | 1 |
| Q5V0N0_HALMA | 1 | Phytoene synthase (EC 2.5.1.32) (EC 2.5.1.21)               | <i>criB</i>     | rmAC2069 | 323 | 29.4 | 5 | 7 | 1      | R | VADEVVDQTDGPPPTVQHEQLEVIR              | E | 3 | 2770.3773 | 2770.3701 | -0.007185 | 0       | -2.59  | 6.897 | 0.529 | 0   | 1   | 41 | 96  | 2 | 0 | 1 |
| Q5V0Z0_HALMA | 1 | Hypothetical protein                                        | <i>rmAC1944</i> | rmAC1944 | 170 | 10   | 1 | 7 | 1      | R | TAQESLIEDAINSFEER                      | A | 2 | 1950.917  | 1950.9178 | 0.000797  | 0       | 0.41   | 5.963 | 0.604 | 0   | 1   | 25 | 32  | 2 | 0 | 1 |
| Q5V0Z0_HALMA | 1 | Hypothetical protein                                        | <i>rmAC1944</i> | rmAC1944 | 170 | 10   | 1 | 7 | 1      | R | TAQESLIEDAINSFEER                      | A | 2 | 1950.917  | 1950.9192 | 0.002139  | 0       | 1.10   | 5.308 | 0.587 | 0   | 1   | 25 | 32  | 2 | 0 | 1 |
| Q5V0Z0_HALMA | 1 | Hypothetical protein                                        | <i>rmAC1944</i> | rmAC1944 | 170 | 10   | 1 | 7 | 1      | R | TAQESLIEDAINSFEER                      | A | 2 | 1950.917  | 1950.9184 | 0.001407  | 0       | 0.72   | 5.891 | 0.563 | 0   | 1   | 26 | 32  | 2 | 0 | 1 |
| Q5V0Z0_HALMA | 1 | Hypothetical protein                                        | <i>rmAC1944</i> | rmAC1944 | 170 | 10   | 1 | 7 | 1      | R | TAQESLIEDAINSFEER                      | A | 2 | 1950.917  | 1950.9171 | 0.000064  | 0       | 0.03   | 5.838 | 0.578 | 0   | 1   | 26 | 32  | 2 | 0 | 1 |
| Q5V0Z0_HALMA | 1 | Hypothetical protein                                        | <i>rmAC1944</i> | rmAC1944 | 170 | 10   | 1 | 7 | 1      | R | TAQESLIEDAINSFEER                      | A | 3 | 1950.917  | 1950.9168 | -0.000254 | 0       | -0.13  | 4.635 | 0.401 | 0   | 1   | 31 | 64  | 2 | 0 | 1 |
| Q5V0Z0_HALMA | 1 | Hypothetical protein                                        | <i>rmAC1944</i> | rmAC1944 | 170 | 10   | 1 | 7 | 1      | R | TAQESLIEDAINSFEER                      | A | 3 | 1950.917  | 1951.9282 | 1.011147  | -1.0034 | 4.00   | 3.968 | 0.379 | 0   | 1   | 28 | 64  | 2 | 0 | 1 |
| Q5V0Z0_HALMA | 1 | Hypothetical protein                                        | <i>rmAC1944</i> | rmAC1944 | 170 | 10   | 1 | 7 | 1      | R | TAQESLIEDAINSFEER                      | A | 3 | 1950.917  | 1950.9168 | -0.000254 | 0       | -0.13  | 5.026 | 0.443 | 0   | 1   | 32 | 64  | 2 | 0 | 1 |
| Q5V196_HALMA | 1 | Putative hydrolase                                          | <i>rmAC1818</i> | rmAC1818 | 623 | 16.5 | 6 | 7 | 0.9806 | R | FGGLHATDQLPSER                         | C | 3 | 1526.7477 | 1526.7471 | -0.000632 | 0       | -0.41  | 3.055 | 0.11  | 0.5 | 65  | 20 | 52  | 2 | 0 | 1 |
| Q5V196_HALMA | 1 | Putative hydrolase                                          | <i>rmAC1818</i> | rmAC1818 | 623 | 16.5 | 6 | 7 | 0.9409 | R | AKLGDDSHSVTTGLR                        | C | 3 | 1597.806  | 1597.8057 | -0.000277 | 0       | -0.17  | 2.361 | 0.205 | 0.2 | 193 | 18 | 56  | 2 | 1 | 1 |
| Q5V196_HALMA | 1 | Putative hydrolase                                          | <i>rmAC1818</i> | rmAC1818 | 623 | 16.5 | 6 | 7 | 0.9916 | R | FGGLHATDQLPSER                         | C | 3 | 1526.7477 | 1526.7468 | -0.000907 | 0       | -0.59  | 3.412 | 0.114 | 0.4 | 55  | 22 | 52  | 2 | 0 | 1 |
| Q5V196_HALMA | 1 | Putative hydrolase                                          | <i>rmAC1818</i> | rmAC1818 | 623 | 16.5 | 6 | 7 | 1      | R | GVTLRKDPTVEDVAR                        | A | 3 | 1526.8052 | 1526.8047 | -0.000545 | 0       | -0.36  | 3.952 | 0.333 | 0   | 1   | 31 | 52  | 2 | 1 | 1 |
| Q5V196_HALMA | 1 | Putative hydrolase                                          | <i>rmAC1818</i> | rmAC1818 | 623 | 16.5 | 6 | 7 | 1      | R | LTATYAQHPSFAAVGVHDEPVSPYADGLSGSGLDLRLR | F | 5 | 3913.9387 | 3913.9398 | 0.001029  | 0       | 0.26   | 2.742 | 0.335 | 0.1 | 1   | 58 | 288 | 2 | 1 | 1 |
| Q5V196_HALMA | 1 | Putative hydrolase                                          | <i>rmAC1818</i> | rmAC1818 | 623 | 16.5 | 6 | 7 | 1      | R | LTATYAQHPSFAAVGVHDEPVSPYADGLSGSGLDLRLR | F | 5 | 3913.9387 | 3913.934  | -0.004769 | 0       | -1.22  | 2.756 | 0.337 | 0.3 | 1   | 52 | 288 | 2 | 1 | 1 |
| Q5V2F8_HALMA | 1 | Hypothetical protein                                        | <i>rmAC1365</i> | rmAC1365 | 386 | 20.7 | 5 | 7 | 0.9993 | R | VRQDVTDTQLRDAQTSE                      | - | 2 | 1960.945  | 1960.9437 | -0.001325 | 0       | -0.68  | 2.787 | 0.296 | 0.1 | 1   | 16 | 32  | 2 | 2 | 1 |
| Q5V2F8_HALMA | 1 | Hypothetical protein                                        | <i>rmAC1365</i> | rmAC1365 | 386 | 20.7 | 5 | 7 | 1      | K | DSTVDGQYVYHQTDDEQGER                   | Q | 2 | 2225.9461 | 2226.941  | 0.99489   | -1.0034 | -3.80  | 3.775 | 0.478 | 0   | 1   | 19 | 36  | 2 | 0 | 1 |
| Q5V2F8_HALMA | 1 | Hypothetical protein                                        | <i>rmAC1365</i> | rmAC1365 | 386 | 20.7 | 5 | 7 | 1      | R | LDASAGNELIADAASDAR                     | T | 2 | 1758.8384 | 1758.8362 | -0.002268 | 0       | -1.29  | 3.672 | 0.338 | 0   | 1   | 20 | 34  | 2 | 0 | 1 |
| Q5V2F8_HALMA | 1 | Hypothetical protein                                        | <i>rmAC1365</i> | rmAC1365 | 386 | 20.7 | 5 | 7 | 1      | R | TEALEVAVIAR                            | G | 2 | 1170.6608 | 1170.6654 | 0.004624  | 0       | 3.95   | 3.106 | 0.381 | 0   | 1   | 18 | 20  | 2 | 0 | 1 |
| Q5V2F8_HALMA | 1 | Hypothetical protein                                        | <i>rmAC1365</i> | rmAC1365 | 386 | 20.7 | 5 | 7 | 1      | R | TEALEVAVIAR                            | G | 2 | 1170.6608 | 1170.6595 | -0.001304 | 0       | -1.11  | 4.263 | 0.33  | 0   | 1   | 19 | 20  | 2 | 0 | 1 |
| Q5V2T9_HALMA | 1 | Hypothetical protein                                        | <i>rmAC1219</i> | rmAC1219 | 788 | 7.5  | 4 | 7 | 1      | R | VVSITAYDSDNMTMGGLLDRPDSLVTVK           | S | 3 | 2865.443  | 2865.4444 | 0.001334  | 0       | 0.47   | 4.921 | 0.495 | 0   | 1   | 35 | 104 | 2 | 0 | 1 |
| Q5V2T9_HALMA | 1 | Hypothetical protein                                        | <i>rmAC1219</i> | rmAC1219 | 788 | 7.5  | 4 | 7 | 0.9996 | R | LGPAPAAVANQLGR                         | E | 2 | 1262.7095 | 1262.7054 | -0.004076 | 0       | -3.23  | 2.486 | 0.314 | 0.1 | 17  | 15 | 24  | 2 | 0 | 1 |
| Q5V2T9_HALMA | 1 | Hypothetical protein                                        | <i>rmAC1219</i> | rmAC1219 | 788 | 7.5  | 4 | 7 | 1      | R | VTATLSGDDEYAR                          | N | 2 | 1396.647  | 1396.6443 | -0.002763 | 0       | -1.98  | 4.134 | 0.446 | 0   | 1   | 18 | 24  | 2 | 0 | 1 |
| Q5V2T9_HALMA | 1 | Hypothetical protein                                        | <i>rmAC1219</i> | rmAC1219 | 788 | 7.5  | 4 | 7 | 1      | R | VVSITAYDSDNMTMGGLLDRPDSLVTVK           | S | 3 | 2865.443  | 2865.4486 | 0.005545  | 0       | 1.94   | 4.61  | 0.487 | 0   | 1   | 36 | 104 | 2 | 0 | 1 |
| Q5V2T9_HALMA | 1 | Hypothetical protein                                        | <i>rmAC1219</i> | rmAC1219 | 788 | 7.5  | 4 | 7 | 1      | R | VVSITAYDSDNMTMGGLLDRPDSLVTVK           | S | 3 | 2865.443  | 2865.4407 | -0.002329 | 0       | -0.81  | 5.017 | 0.515 | 0   | 1   | 36 | 104 | 2 | 0 | 1 |
| Q5V2T9_HALMA | 1 | Hypothetical protein                                        | <i>rmAC1219</i> | rmAC1219 | 788 | 7.5  | 4 | 7 | 1      | R | VVSITAYDSDNMTMGGLLDRPDSLVTVK           | S | 3 | 2865.443  | 2865.4464 | 0.003348  | 0       | 1.17   | 5.313 | 0.517 | 0   | 1   | 34 | 104 | 2 | 0 | 1 |
| Q5V357_HALMA | 1 | 3-hydroxyacyl-CoA dehydrogenase (EC 1.1.1.35) (EC 4.2.1.17) | <i>hbd1</i>     | rmAC1083 | 669 | 17.9 | 5 | 7 | 1      | K | IADKTGLETLIDTLEETHEETGADR              | Y | 4 | 2756.3352 | 2756.3332 | -0.002025 | 0       | -0.73  | 4.052 | 0.315 | 0   | 1   | 44 | 144 | 2 | 1 | 1 |
| Q5V357_HALMA | 1 | 3-hydroxyacyl-CoA dehydrogenase (EC 1.1.1.35) (EC 4.2.1.17) | <i>hbd1</i>     | rmAC1083 | 669 | 17.9 | 5 | 7 | 0.9752 | R | MNTVSPDLMDDDLADAVDLLENDDEVIR           | A | 3 | 2904.3005 | 2904.2832 | -0.017299 | 0       | -5.96  | 3.049 | 0.061 | 0.9 | 1   | 31 | 100 | 2 | 0 | 1 |
| Q5V357_HALMA | 1 | 3-hydroxyacyl-CoA dehydrogenase (EC 1.1.1.35) (EC 4.2.1.17) | <i>hbd1</i>     | rmAC1083 | 669 | 17.9 | 5 | 7 | 1      | R | MQLVEVISGAHSGDDTLEAIEALAEDFGKTPVR      | V | 4 | 3497.7348 | 3497.7363 | 0.001451  | 0       | 0.41   | 4.333 | 0.431 | 0   | 1   | 46 | 192 | 2 | 1 | 1 |
| Q5V357_HALMA | 1 | 3-hydroxyacyl-CoA dehydrogenase (EC 1.1.1.35) (EC 4.2.1.17) | <i>hbd1</i>     | rmAC1083 | 669 | 17.9 | 5 | 7 | 1      | R | MQLVEVISGAHSGDDTLEAIEALAEDFGKTPVR      | V | 4 | 3497.7348 | 3497.7207 | -0.014174 | 0       | -4.05  | 4.314 | 0.431 | 0   | 1   | 54 | 192 | 2 | 1 | 1 |
| Q5V357_HALMA | 1 | 3-hydroxyacyl-CoA dehydrogenase (EC 1.1.1.35) (EC 4.2.1.17) | <i>hbd1</i>     | rmAC1083 | 669 | 17.9 | 5 | 7 | 1      | R | VTPLVDVEEAVSDVDVIEAVPEK                | M | 3 | 2550.3316 | 2550.331  | -0.000609 | 0       | -0.24  | 4.019 | 0.393 | 0   | 1   | 32 | 92  | 2 | 0 | 1 |
| Q5V3H5_HALMA | 1 | Hypothetical protein                                        | <i>rmAC0956</i> | rmAC0956 | 178 | 11.8 | 2 | 7 | 0.9994 | R | FDLQDDALFLLR                           | G | 3 | 1464.7613 | 1465.7482 | 0.986847  | -1.0034 | -11.27 | 3.45  | 0.123 | 0.3 | 1   | 24 | 44  | 2 | 0 | 1 |
| Q5V3H5_HALMA | 1 | Hypothetical protein                                        | <i>rmAC0956</i> | rmAC0956 | 178 | 11.8 | 2 | 7 | 1      | R | FDLQDDALFLLR                           | G | 2 | 1464.7613 | 1464.7602 | -0.001096 | 0       | -0.75  | 3.584 | 0.488 | 0   | 1   | 18 | 22  | 2 | 0 | 1 |
| Q5V3H5_HALMA | 1 | Hypothetical protein                                        | <i>rmAC0956</i> | rmAC0956 | 178 | 11.8 | 2 | 7 | 1      | R | FDLQDDALFLLR                           | G | 2 | 1464.7613 | 1464.7604 | -0.000974 | 0       | -0.66  | 3.492 | 0.478 | 0   | 1   | 18 | 22  | 2 | 0 | 1 |
| Q5V3H5_HALMA | 1 | Hypothetical protein                                        | <i>rmAC0956</i> | rmAC0956 | 178 | 11.8 | 2 | 7 | 1      | R | FDLQDDALFLLR                           | G | 2 | 1464.7613 | 1464.7582 | -0.003171 | 0       | -2.16  | 3.785 | 0.447 | 0   | 1   | 18 | 22  | 2 | 0 | 1 |
| Q5V3H5_HALMA | 1 | Hypothetical protein                                        | <i>rmAC0956</i> | rmAC0956 | 178 | 11.8 | 2 | 7 | 1      | R | FDLQDDALFLLR                           | G | 2 | 1464.7613 | 1464.7621 | 0.000735  | 0       | 0.50   | 3.555 | 0.427 | 0   | 1   | 18 | 22  | 2 | 0 | 1 |
| Q5V3H5_HALMA | 1 | Hypothetical protein                                        | <i>rmAC0956</i> | rmAC0956 | 178 | 11.8 | 2 | 7 | 0.9177 | R | FDLQDDALFLLR                           | G | 3 | 1464.7613 | 1464.756  | -0.005321 | 0       | -3.63  | 2.71  | 0.022 | 2.4 | 8   | 21 | 44  | 2 | 0 | 1 |
| Q5V3U3_HALMA | 1 | High-affinity branched-chain amino acid transport protein   | <i>livM</i>     | rmAC0825 | 460 | 8.5  | 3 | 7 | 0.9188 | K | AIREDETVTQSLGKDR                       | R | 4 | 1917.9756 | 1917.9738 | -0.0018   | 0       | -0.94  | 2.85  | 0.108 | 0.8 | 185 | 26 | 96  | 2 | 2 | 1 |
| Q5V3U3_HALMA | 1 | High-affinity branched-chain amino acid transport protein   | <i>livM</i>     | rmAC0825 | 460 | 8.5  | 3 | 7 | 1      | K | AIREDETVTQSLGK                         | D | 2 | 1545.7998 | 1545.7966 | -0.003219 | 0       | -2.08  | 3.831 | 0.382 | 0   | 1   | 18 | 26  | 2 | 1 | 1 |
| Q5V3U3_HALMA | 1 | High-affinity branched-chain amino acid transport protein   | <i>livM</i>     | rmAC0825 | 460 | 8.5  | 3 | 7 | 0.9998 | K | AIREDETVTQSLGK                         | D | 2 | 1545.7998 | 1545.8001 | 0.000321  | 0       | 0.21   | 3.443 | 0.307 | 0   | 2   | 13 | 26  | 2 | 1 | 1 |
| Q5V3U3_HALMA | 1 | High-affinity branched-chain amino acid transport protein   | <i>livM</i>     | rmAC0825 | 460 | 8.5  | 3 | 7 | 0.9997 | K | AIREDETVTQSLGK                         | D | 3 | 1545.7998 | 1545.7987 | -0.001157 | 0       | -0.75  | 3.205 | 0.221 | 0.4 | 1   | 25 | 52  | 2 | 1 | 1 |
| Q5V3U3_HALMA | 1 | High-affinity branched-chain amino acid transport protein   | <i>livM</i>     | rmAC0825 | 460 | 8.5  | 3 | 7 | 1      | R | NEPATSVSLDRPQSGSGGEANE                 | - | 2 | 2200.9832 | 2201.9825 | 0.999294  | -1.0034 | -1.84  | 3.996 | 0.547 | 0   | 1   | 21 | 42  | 2 | 0 | 1 |
| Q5V3U3_HALMA | 1 | High-affinity branched-chain amino acid transport protein   | <i>livM</i>     | rmAC0825 | 460 | 8.5  | 3 | 7 | 0.9998 | R | NEPATSVSLDRPQSGSGGEANE                 | - | 2 | 2200.9832 | 2200.9859 | 0.002712  | 0       | 1.23   | 2.846 | 0.245 | 0.1 | 1   | 17 | 42  | 2 | 0 | 1 |
| Q5V3U3_HALMA | 1 | High-affinity branched-chain amino acid transport protein   | <i>livM</i>     | rmAC0825 | 460 | 8.5  | 3 | 7 | 0.9982 | R | NEPATSVSLDRPQSGSGGEANE                 | - | 2 | 2200.9832 | 2200.9854 | 0.002224  | 0       | 1.01   | 2.232 | 0.232 | 0   | 1   | 16 | 42  | 2 | 0 | 1 |
| Q5V3X3_HALMA | 1 | Cell division control protein 48                            | <i>cdc48b</i>   | rmAC0792 | 757 | 9.6  | 5 | 7 | 0.9999 | K | ARENAPTUVFFDEIDSJIAGER                 | G | 3 | 2335.1444 | 2336.1382 | 0.993747  | -1.0034 | -4.11  | 3.144 | 0.315 | 0.1 | 1   | 31 | 80  | 2 | 1 | 1 |
| Q5V3X3_HALMA | 1 | Cell division control protein 48                            | <i>cdc48b</i>   | rmAC0792 | 757 | 9.6  | 5 | 7 | 1      | K | ARENAPTUVFFDEIDSJIAGER                 | G | 3 | 2335.1444 | 2335.14   | -0.004449 | 0       | -1.91  | 3.785 | 0.487 | 0   | 1   | 32 | 80  | 2 | 1 | 1 |
| Q5V3X3_HALMA | 1 | Cell division                                               |                 |          |     |      |   |   |        |   |                                        |   |   |           |           |           |         |        |       |       |     |     |    |     |   |   |   |

|                  |        |                                            |                 |          |     |      |   |   |        |   |                                  |   |   |           |           |           |         |        |       |       |     |     |    |     |   |   |   |
|------------------|--------|--------------------------------------------|-----------------|----------|-----|------|---|---|--------|---|----------------------------------|---|---|-----------|-----------|-----------|---------|--------|-------|-------|-----|-----|----|-----|---|---|---|
| Q5V7E1_HALMA     | 1      | Copper-transporting ATPase (EC 3.6.3.4)    | <i>copA3</i>    | pNG6046  | 868 | 4.5  | 5 | 7 | 1      | R | LSEDDVLRLLAAIAESGSEHPLAR         | A | 4 | 2448.2608 | 2448.2595 | -0.001355 | 0       | -0.55  | 4.539 | 0.318 | 0   | 1   | 45 | 132 | 2 | 1 | 1 |
| Q5V7E1_HALMA     | 1      | Copper-transporting ATPase (EC 3.6.3.4)    | <i>copA3</i>    | pNG6046  | 868 | 4.5  | 5 | 7 | 1      | R | YTPDHDYKLFGLR                    | - | 3 | 1770.8729 | 1770.8798 | 0.006858  | 0       | 3.87   | 3.279 | 0.35  | 0   | 1   | 24 | 52  | 2 | 1 | 1 |
| Q5V7G3_HALMA     | 1      | ABC transporter permease protein           | <i>abcP-1</i>   | pNG5001  | 367 | 15.8 | 3 | 7 | 0.9999 | K | AASEEPVDALRG                     | - | 2 | 1213.5939 | 1213.5914 | -0.002519 | 0       | -2.08  | 2.835 | 0.387 | 0   | 1   | 17 | 22  | 2 | 1 | 2 |
| Q5V7G3_HALMA     | 1      | ABC transporter permease protein           | <i>abcP-1</i>   | pNG5001  | 367 | 15.8 | 3 | 7 | 0.9999 | K | AASEEPVDALRG                     | - | 2 | 1213.5939 | 1213.592  | -0.001909 | 0       | -1.57  | 3.018 | 0.362 | 0   | 1   | 16 | 22  | 2 | 1 | 2 |
| Q5V7G3_HALMA     | 1      | ABC transporter permease protein           | <i>abcP-1</i>   | pNG5001  | 367 | 15.8 | 3 | 7 | 0.9999 | K | AASEEPVDALRG                     | - | 2 | 1213.5939 | 1213.5938 | -0.000078 | 0       | -0.06  | 2.686 | 0.367 | 0   | 1   | 17 | 22  | 2 | 1 | 2 |
| Q5V7G3_HALMA     | 1      | ABC transporter permease protein           | <i>abcP-1</i>   | pNG5001  | 367 | 15.8 | 3 | 7 | 1      | R | SYSEVYITESTGTR                   | A | 2 | 1591.7366 | 1592.1854 | 0.448824  | 0       | 281.97 | 3.11  | 0.382 | 0   | 1   | 17 | 26  | 2 | 0 | 1 |
| Q5V7G3_HALMA     | 1      | ABC transporter permease protein           | <i>abcP-1</i>   | pNG5001  | 367 | 15.8 | 3 | 7 | 1      | R | SYSEVYITESTGTR                   | A | 2 | 1591.7366 | 1591.7336 | -0.003008 | 0       | -1.89  | 5.427 | 0.578 | 0   | 1   | 22 | 26  | 2 | 0 | 1 |
| Q5V7G3_HALMA     | 1      | ABC transporter permease protein           | <i>abcP-1</i>   | pNG5001  | 367 | 15.8 | 3 | 7 | 1      | R | SYSEVYITESTGTR                   | A | 2 | 1591.7366 | 1592.7454 | 1.008824  | -1.0034 | 3.44   | 4.266 | 0.474 | 0   | 1   | 21 | 26  | 2 | 0 | 1 |
| Q5V7G3_HALMA     | 1      | ABC transporter permease protein           | <i>abcP-1</i>   | pNG5001  | 367 | 15.8 | 3 | 7 | 1      | R | SYSEVYITESTGTR                   | A | 2 | 1591.7366 | 1591.7346 | -0.002031 | 0       | -1.28  | 3.789 | 0.502 | 0   | 1   | 19 | 26  | 2 | 0 | 1 |
| Q5V7G3_HALMA     | 1      | ABC transporter permease protein           | <i>abcP-1</i>   | pNG5001  | 367 | 15.8 | 3 | 7 | 1      | R | SYSEVYITESTGTR                   | A | 2 | 1591.7366 | 1591.7454 | 0.008824  | 0       | 5.54   | 4.253 | 0.499 | 0   | 1   | 21 | 26  | 2 | 0 | 1 |
| Q5V7G3_HALMA     | 1      | ABC transporter permease protein           | <i>abcP-1</i>   | pNG5001  | 367 | 15.8 | 3 | 7 | 1      | R | VGTYSYNREDAASETIVGVENPAALYEAQEGR | V | 3 | 3458.6226 | 3460.6282 | 2.005547  | -2.0067 | -0.33  | 6.275 | 0.535 | 0   | 1   | 42 | 124 | 2 | 1 | 1 |
| Q5V7H0_HALMA     | 1      | Hypothetical protein                       | <i>pNG5010</i>  | pNG5010  | 292 | 11   | 2 | 7 | 1      | R | AYSVDLTVNYYR                     | D | 2 | 1299.6459 | 1299.6458 | -0.000076 | 0       | -0.06  | 2.945 | 0.387 | 0   | 1   | 15 | 20  | 2 | 0 | 1 |
| Q5V7H0_HALMA     | 1      | Hypothetical protein                       | <i>pNG5010</i>  | pNG5010  | 292 | 11   | 2 | 7 | 1      | R | AYSVDLTVNYYR                     | D | 2 | 1299.6459 | 1299.6469 | 0.001023  | 0       | 0.79   | 2.922 | 0.396 | 0   | 1   | 16 | 20  | 2 | 0 | 1 |
| Q5V7H0_HALMA     | 1      | Hypothetical protein                       | <i>pNG5010</i>  | pNG5010  | 292 | 11   | 2 | 7 | 0.9997 | R | AYSVDLTVNYYR                     | D | 2 | 1299.6459 | 1299.6449 | -0.001053 | 0       | -0.81  | 3.255 | 0.117 | 0.1 | 1   | 15 | 20  | 2 | 0 | 1 |
| Q5V7H0_HALMA     | 1      | Hypothetical protein                       | <i>pNG5010</i>  | pNG5010  | 292 | 11   | 2 | 7 | 0.9991 | R | AYSVDLTVNYYR                     | D | 2 | 1299.6459 | 1299.6454 | -0.000476 | 0       | -0.37  | 2.156 | 0.3   | 0   | 11  | 11 | 20  | 2 | 0 | 1 |
| Q5V7H0_HALMA     | 1      | Hypothetical protein                       | <i>pNG5010</i>  | pNG5010  | 292 | 11   | 2 | 7 | 0.9989 | R | AYSVDLTVNYYR                     | D | 2 | 1299.6459 | 1299.6466 | 0.000656  | 0       | 0.50   | 2.296 | 0.233 | 0.1 | 2   | 13 | 20  | 2 | 0 | 1 |
| Q5V7H0_HALMA     | 1      | Hypothetical protein                       | <i>pNG5010</i>  | pNG5010  | 292 | 11   | 2 | 7 | 1      | K | TPVSLDPQYEMP                     | T | 2 | 2406.0573 | 2406.065  | 0.007713  | 0       | 3.21   | 4.457 | 0.486 | 0   | 1   | 24 | 40  | 2 | 0 | 1 |
| Q5V7H0_HALMA     | 1      | Hypothetical protein                       | <i>pNG5010</i>  | pNG5010  | 292 | 11   | 2 | 7 | 1      | K | TPVSLDPQYEMP                     | T | 2 | 2406.0573 | 2407.0654 | 1.008124  | -1.0034 | 1.98   | 4.577 | 0.427 | 0   | 1   | 27 | 40  | 2 | 0 | 1 |
| Q5V7K5_HALMA     | 1      | Universal stress protein                   | <i>usp8</i>     | pNG5052  | 138 | 46.4 | 5 | 7 | 1      | R | TSVVVGDPVETIIATVK                | N | 4 | 3278.6816 | 3278.686  | 0.004358  | 0       | 1.33   | 3.334 | 0.38  | 0   | 1   | 50 | 180 | 2 | 1 | 1 |
| Q5V7K5_HALMA     | 1      | Universal stress protein                   | <i>usp8</i>     | pNG5052  | 138 | 46.4 | 5 | 7 | 1      | K | AEAESLKDQAQAEFMSPEKIR            | D | 4 | 2362.1838 | 2362.1811 | -0.002724 | 0       | -1.15  | 2.362 | 0.325 | 0.1 | 1   | 40 | 120 | 2 | 2 | 1 |
| Q5V7K5_HALMA     | 1      | Universal stress protein                   | <i>usp8</i>     | pNG5052  | 138 | 46.4 | 5 | 7 | 1      | R | LLVGSVAEQVMR                     | K | 2 | 1300.7173 | 1300.7169 | -0.000431 | 0       | -0.33  | 3.147 | 0.446 | 0   | 1   | 19 | 22  | 2 | 0 | 1 |
| Q5V7K5_HALMA     | 1      | Universal stress protein                   | <i>usp8</i>     | pNG5052  | 138 | 46.4 | 5 | 7 | 1      | R | TSVVVGDPVETIIATVK                | N | 2 | 1726.9716 | 1726.9454 | -0.026176 | 0       | -15.16 | 3.109 | 0.434 | 0   | 1   | 20 | 32  | 2 | 0 | 1 |
| Q5V7K5_HALMA     | 1      | Universal stress protein                   | <i>usp8</i>     | pNG5052  | 138 | 46.4 | 5 | 7 | 1      | R | TSVVVGDPVETIIATVK                | N | 4 | 3278.6816 | 3278.6867 | 0.005091  | 0       | 1.55   | 2.728 | 0.412 | 0   | 1   | 49 | 180 | 2 | 1 | 1 |
| Q5V7K5_HALMA     | 1      | Universal stress protein                   | <i>usp8</i>     | pNG5052  | 138 | 46.4 | 5 | 7 | 1      | R | TSVVVGDPVETIIATVK                | N | 4 | 3278.6816 | 3278.6779 | -0.003698 | 0       | -1.13  | 3.511 | 0.448 | 0   | 1   | 54 | 180 | 2 | 1 | 1 |
| Q5V881_HALMA     | 1      | Flagellin A protein                        | <i>flaA2</i>    | pNG1026  | 463 | 7.3  | 3 | 7 | 0.9994 | R | ESGSQVEITNEDTGV                  | L | 2 | 2167.0128 | 2167.0125 | -0.000277 | 0       | -0.13  | 3.343 | 0.122 | 0.3 | 1   | 18 | 40  | 2 | 0 | 1 |
| Q5V881_HALMA     | 1      | Flagellin A protein                        | <i>flaA2</i>    | pNG1026  | 463 | 7.3  | 3 | 7 | 1      | R | ESGSQVEITNEDTGV                  | L | 2 | 2167.0128 | 2168.0254 | 1.012624  | -1.0034 | 4.28   | 4.592 | 0.447 | 0   | 1   | 19 | 40  | 2 | 0 | 1 |
| Q5V881_HALMA     | 1      | Flagellin A protein                        | <i>flaA2</i>    | pNG1026  | 463 | 7.3  | 3 | 7 | 1      | R | ESGSQVEITNEDTGV                  | L | 2 | 2167.0128 | 2167.0104 | -0.002474 | 0       | -1.14  | 6.48  | 0.597 | 0   | 1   | 27 | 40  | 2 | 0 | 1 |
| Q5V881_HALMA     | 1      | Flagellin A protein                        | <i>flaA2</i>    | pNG1026  | 463 | 7.3  | 3 | 7 | 1      | R | ESGSQVEITNEDTGV                  | L | 2 | 2167.0128 | 2168.0191 | 1.006315  | -1.0034 | 1.37   | 5.48  | 0.553 | 0   | 1   | 25 | 40  | 2 | 0 | 1 |
| Q5V881_HALMA     | 1      | Flagellin A protein                        | <i>flaA2</i>    | pNG1026  | 463 | 7.3  | 3 | 7 | 1      | R | ESGSQVEITNEDTGV                  | L | 2 | 2167.0128 | 2167.0054 | -0.007376 | 0       | -3.40  | 3.152 | 0.386 | 0   | 1   | 15 | 40  | 2 | 0 | 1 |
| Q5V881_HALMA     | 1      | Flagellin A protein                        | <i>flaA2</i>    | pNG1026  | 463 | 7.3  | 3 | 7 | 1      | R | ESGSQVEITNEDTGV                  | F | 3 | 3510.7061 | 3510.7135 | 0.007399  | 0       | 2.11   | 4.395 | 0.384 | 0   | 2   | 28 | 132 | 2 | 2 | 1 |
| RL10_HALMAReview | 1      | 50S ribosomal protein L10e                 | <i>rpl10e</i>   | rmAC2357 | 177 | 19.2 | 3 | 7 | 1      | R | HLIKELGEEGDYK                    | M | 2 | 1529.7725 | 1529.7756 | 0.003085  | 0       | 2.02   | 3.84  | 0.461 | 0   | 1   | 18 | 24  | 2 | 1 | 1 |
| RL10_HALMAReview | 1      | 50S ribosomal protein L10e                 | <i>rpl10e</i>   | rmAC2357 | 177 | 19.2 | 3 | 7 | 0.9998 | K | DADDYPVQISLVEETVQLR              | H | 3 | 2302.1692 | 2303.1824 | 1.013171  | -1.0034 | 4.27   | 3.412 | 0.23  | 0.6 | 1   | 28 | 76  | 2 | 0 | 1 |
| RL10_HALMAReview | 1      | 50S ribosomal protein L10e                 | <i>rpl10e</i>   | rmAC2357 | 177 | 19.2 | 3 | 7 | 1      | R | HLIKELGEEGDYK                    | M | 3 | 1529.7725 | 1529.7706 | -0.001903 | 0       | -1.24  | 2.832 | 0.484 | 0   | 1   | 25 | 48  | 2 | 1 | 1 |
| RL10_HALMAReview | 1      | 50S ribosomal protein L10e                 | <i>rpl10e</i>   | rmAC2357 | 177 | 19.2 | 3 | 7 | 1      | R | HLIKELGEEGDYK                    | M | 3 | 1529.7725 | 1529.7707 | -0.001811 | 0       | -1.18  | 2.997 | 0.36  | 0   | 1   | 25 | 48  | 2 | 1 | 1 |
| RL10_HALMAReview | 1      | 50S ribosomal protein L10e                 | <i>rpl10e</i>   | rmAC2357 | 177 | 19.2 | 3 | 7 | 0.9995 | N | RLHIKELGEEGDYK                   | M | 4 | 1685.8737 | 1685.8751 | 0.001345  | 0       | 0.80   | 3.181 | 0.365 | 0   | 1   | 39 | 78  | 1 | 2 | 1 |
| RL10_HALMAReview | 1      | 50S ribosomal protein L10e                 | <i>rpl10e</i>   | rmAC2357 | 177 | 19.2 | 3 | 7 | 0.9994 | N | RLHIKELGEEGDYK                   | M | 4 | 1685.8737 | 1685.8737 | 0.000003  | 0       | 0.00   | 3.379 | 0.352 | 0   | 1   | 35 | 78  | 1 | 2 | 1 |
| RL10_HALMAReview | 1      | 50S ribosomal protein L10e                 | <i>rpl10e</i>   | rmAC2357 | 177 | 19.2 | 3 | 7 | 0.9984 | N | RLHIKELGEEGDYK                   | M | 3 | 1685.8737 | 1685.8738 | 0.000077  | 0       | 0.05   | 3.595 | 0.321 | 0   | 1   | 28 | 52  | 1 | 2 | 1 |
| RL19_HALMAReview | 1      | 50S ribosomal protein L19e (Hmal19) (HI24) | <i>rpl19e</i>   | rmAC1594 | 149 | 51.7 | 7 | 7 | 0.9888 | K | LRELDEGTLSSSQYRDL                | D | 4 | 2543.2616 | 2543.2629 | 0.001263  | 0       | 0.50   | 3.168 | 0.229 | 0.8 | 14  | 35 | 120 | 2 | 3 | 1 |
| RL19_HALMAReview | 1      | 50S ribosomal protein L19e (Hmal19) (HI24) | <i>rpl19e</i>   | rmAC1594 | 149 | 51.7 | 7 | 7 | 1      | K | AGGGEFDSVADLERYIDANHGDA          | - | 3 | 2378.0411 | 2378.0388 | -0.002284 | 0       | -0.96  | 3.443 | 0.419 | 0   | 1   | 31 | 88  | 2 | 1 | 1 |
| RL19_HALMAReview | 1      | 50S ribosomal protein L19e (Hmal19) (HI24) | <i>rpl19e</i>   | rmAC1594 | 149 | 51.7 | 7 | 7 | 1      | R | EDVRELVDGAIQAK                   | D | 3 | 1670.8475 | 1670.8494 | 0.001924  | 0       | 1.15   | 3.979 | 0.298 | 0   | 1   | 29 | 56  | 2 | 1 | 1 |
| RL19_HALMAReview | 1      | 50S ribosomal protein L19e (Hmal19) (HI24) | <i>rpl19e</i>   | rmAC1594 | 149 | 51.7 | 7 | 7 | 0.9266 | R | ELRDEGTLSSSQYR                   | D | 2 | 1639.7802 | 1639.7752 | -0.004982 | 0       | -3.04  | 2.226 | 0.151 | 0.5 | 2   | 13 | 26  | 2 | 1 | 1 |
| RL19_HALMAReview | 1      | 50S ribosomal protein L19e (Hmal19) (HI24) | <i>rpl19e</i>   | rmAC1594 | 149 | 51.7 | 7 | 7 | 0.953  | K | LRELDEGTLSSSQYRD                 | L | 3 | 2023.9923 | 2023.9921 | -0.000176 | 0       | -0.09  | 3.522 | 0.363 | 0   | 1   | 21 | 64  | 1 | 3 | 1 |
| Q5UXJ9_HALMA     | 0.9986 | Hypothetical protein                       | <i>rmAC3314</i> | rmAC3314 | 185 | 5.4  | 1 | 7 | 0.9348 | R | WVVRPYIDAK                       | T | 3 | 1245.687  | 1245.6869 | -0.000143 | 0       | -0.11  | 2.066 | 0.16  | 1.3 | 263 | 17 | 36  | 2 | 0 | 1 |
| Q5UXJ9_HALMA     | 0.9986 | Hypothetical protein                       | <i>rmAC3314</i> | rmAC3314 | 185 | 5.4  | 1 | 7 | 0.9999 | R | WVVRPYIDAK                       | T | 2 | 1245.687  | 1245.6855 | -0.001503 | 0       | -1.21  | 2.416 | 0.299 | 0.1 | 2   | 13 | 18  | 2 | 0 | 1 |
| Q5UXJ9_HALMA     | 0.9986 | Hypothetical protein                       | <i>rmAC3314</i> | rmAC3314 | 185 | 5.4  | 1 | 7 | 0.9998 | R | WVVRPYIDAK                       | T | 2 | 1245.687  | 1245.6856 | -0.001381 | 0       | -1.11  | 2.424 | 0.242 | 0.1 | 1   | 14 | 18  | 2 | 0 | 1 |
| Q5UXJ9_HALMA     | 0.9986 | Hypothetical protein                       | <i>rmAC3314</i> | rmAC3314 | 185 | 5.4  | 1 | 7 | 0.9833 | R | WVVRPYIDAK                       | T | 2 | 1245.687  | 1245.6849 | -0.002114 | 0       | -1.70  | 1.959 | 0.176 | 0.7 | 10  | 12 | 18  | 2 | 0 | 1 |
| EF2_HALMAReview  | 1      | Elongation factor 2 (EF-2)                 | <i>fusA</i>     | rmAC2413 | 728 | 6.9  | 3 | 6 | 1      | R | LLAVIQDVNDLIR                    | G | 2 | 1480.8613 | 1480.8652 | 0.003884  | 0       | 2.62   | 3.931 | 0.416 | 0   | 1   | 21 | 24  | 2 | 0 | 1 |
| EF2_HALMAReview  | 1      | Elongation factor 2 (EF-2)                 | <i>fusA</i>     | rmAC2413 | 728 | 6.9  | 3 | 6 | 1      | R | FYSISIEPLGEDIVETIK               | M | 3 | 1965.0346 | 1965.9382 | 0.903547  | -1.0034 | -50.79 | 3.028 | 0.304 | 0.1 | 1   | 28 | 64  | 2 | 0 | 1 |
| EF2_HALMAReview  | 1      | Elongation factor 2 (EF-2)                 | <i>fusA</i>     | rmAC2413 | 728 | 6.9  | 3 | 6 | 1      | R | FYSISIEPLGEDIVETIK               | M | 3 | 1965.0346 | 1966.0282 | 0.993547  | -1.0034 | -4.99  | 3.648 | 0.313 | 0   | 1   | 28 | 64  | 2 | 0 | 1 |
| EF2_HALMAReview  | 1      | Elongation factor 2 (EF-2)                 | <i>fusA</i>     | rmAC2413 | 728 | 6.9  | 3 | 6 | 1      | R | LLAVIQDVNDLIR                    | G | 2 | 1480.8613 | 1480.8615 | 0.000222  | 0       | 0.15   | 3.95  | 0.398 | 0   | 1   | 21 | 24  | 2 | 0 | 1 |
| EF2_HALMAReview  | 1      | Elongation factor 2 (EF-2)                 | <i>fusA</i>     | rmAC2413 | 728 | 6.9  | 3 | 6 | 1      | R | LLAVIQDVNDLIR                    |   |   |           |           |           |         |        |       |       |     |     |    |     |   |   |   |

|              |   |                                                               |                 |          |      |      |   |   |        |   |                                          |   |   |           |           |           |         |        |       |       |     |    |    |     |   |   |   |
|--------------|---|---------------------------------------------------------------|-----------------|----------|------|------|---|---|--------|---|------------------------------------------|---|---|-----------|-----------|-----------|---------|--------|-------|-------|-----|----|----|-----|---|---|---|
| Q5UYE1_HALMA | 1 | Hypothetical protein                                          | <i>rmAC2981</i> | rmAC2981 | 408  | 11.5 | 3 | 6 | 1      | R | VSTTTAGETPYDATEQVTR                      | T | 2 | 2025.9491 | 2025.9424 | -0.006767 | 0       | -3.34  | 3.317 | 0.468 | 0   | 1  | 18 | 36  | 2 | 0 | 1 |
| Q5UYH0_HALMA | 1 | Small heat shock protein                                      | <i>hsp20a</i>   | rmAC2949 | 135  | 40.7 | 3 | 6 | 1      | R | LPEAVDDGETTASYDSGVLTVR                   | E | 2 | 2294.0914 | 2294.0958 | 0.004375  | 0       | 1.91   | 6.426 | 0.617 | 0   | 1  | 31 | 42  | 2 | 0 | 1 |
| Q5UYH0_HALMA | 1 | Small heat shock protein                                      | <i>hsp20a</i>   | rmAC2949 | 135  | 40.7 | 3 | 6 | 1      | R | KLITISATSSQERESTDGGYVQR                  | L | 4 | 2483.2252 | 2483.2241 | -0.001156 | 0       | -0.47  | 3.584 | 0.317 | 0.1 | 1  | 46 | 126 | 2 | 1 | 1 |
| Q5UYH0_HALMA | 1 | Small heat shock protein                                      | <i>hsp20a</i>   | rmAC2949 | 135  | 40.7 | 3 | 6 | 0.9983 | R | KLITISATSSQERESTDGGYVQR                  | E | 3 | 2483.2252 | 2483.224  | -0.001264 | 0       | -0.51  | 2.902 | 0.219 | 0.7 | 1  | 25 | 84  | 2 | 1 | 1 |
| Q5UZM6_HALMA | 1 | Proline dehydrogenase                                         | <i>yusM</i>     | rmAC2471 | 278  | 20.9 | 4 | 6 | 0.9241 | K | DLHDEYGTDYEVQMLMGVRDDEQR                 | D | 3 | 2945.2545 | 2947.2517 | 1.997146  | -2.0067 | -3.24  | 3.032 | 0.097 | 0.9 | 1  | 26 | 92  | 2 | 1 | 1 |
| Q5UZM6_HALMA | 1 | Proline dehydrogenase                                         | <i>yusM</i>     | rmAC2471 | 278  | 20.9 | 4 | 6 | 0.9998 | K | GAYSEPEEVSYSK                            | K | 2 | 1357.6038 | 1357.6032 | -0.000579 | 0       | -0.43  | 2.699 | 0.226 | 0   | 1  | 15 | 22  | 2 | 0 | 1 |
| Q5UZM6_HALMA | 1 | Proline dehydrogenase                                         | <i>yusM</i>     | rmAC2471 | 278  | 20.9 | 4 | 6 | 0.9992 | K | GAYSEPEEVSYSK                            | K | 2 | 1357.6038 | 1357.6023 | -0.001555 | 0       | -1.15  | 2.426 | 0.239 | 0   | 4  | 13 | 22  | 2 | 0 | 1 |
| Q5UZM6_HALMA | 1 | Proline dehydrogenase                                         | <i>yusM</i>     | rmAC2471 | 278  | 20.9 | 4 | 6 | 0.9907 | K | GILNLLGEHYDER                            | Q | 3 | 1527.7681 | 1527.7667 | -0.001409 | 0       | -0.92  | 2.581 | 0.102 | 0.4 | 1  | 20 | 48  | 2 | 0 | 1 |
| Q5UZM6_HALMA | 1 | Proline dehydrogenase                                         | <i>yusM</i>     | rmAC2471 | 278  | 20.9 | 4 | 6 | 0.9992 | R | KENALFAVR                                | A | 2 | 1046.5873 | 1046.5857 | -0.001657 | 0       | -1.58  | 2.184 | 0.21  | 0.1 | 1  | 13 | 16  | 2 | 0 | 1 |
| Q5UZN1_HALMA | 1 | Branched-chain amino acid ABC transporter ATP-binding protein | <i>livG-6</i>   | rmAC2465 | 270  | 40.7 | 4 | 6 | 1      | R | FGLGLVATDDASIEVER                        | G | 2 | 1677.821  | 1677.8254 | 0.004424  | 0       | 2.64   | 3.701 | 0.224 | 0   | 1  | 22 | 30  | 2 | 0 | 1 |
| Q5UZN1_HALMA | 1 | Branched-chain amino acid ABC transporter ATP-binding protein | <i>livG-6</i>   | rmAC2465 | 270  | 40.7 | 4 | 6 | 0.9995 | R | EALLVGPHNQGTGESIIPLFTSPSTVEQEERR         | S | 4 | 3433.7477 | 3433.7499 | 0.002223  | 0       | 0.65   | 4.592 | 0.182 | 0.1 | 6  | 44 | 180 | 2 | 0 | 1 |
| Q5UZN1_HALMA | 1 | Branched-chain amino acid ABC transporter ATP-binding protein | <i>livG-6</i>   | rmAC2465 | 270  | 40.7 | 4 | 6 | 0.9699 | R | EALLVGPHNQGTGESIIPLFTSPSTVEQEERR         | S | 4 | 3433.7477 | 3434.7309 | 0.983171  | -1.0034 | -5.88  | 4.14  | 0.134 | 0.2 | 34 | 37 | 180 | 2 | 0 | 1 |
| Q5UZN1_HALMA | 1 | Branched-chain amino acid ABC transporter ATP-binding protein | <i>livG-6</i>   | rmAC2465 | 270  | 40.7 | 4 | 6 | 0.9991 | R | LADPIIVLNGQSVLVGEPPEAVR                  | S | 3 | 2385.3267 | 2385.3292 | 0.00246   | 0       | 1.03   | 3.364 | 0.189 | 0.3 | 3  | 28 | 88  | 2 | 0 | 1 |
| Q5UZN1_HALMA | 1 | Branched-chain amino acid ABC transporter ATP-binding protein | <i>livG-6</i>   | rmAC2465 | 270  | 40.7 | 4 | 6 | 1      | K | STLFNLVSGFYEPDAGSVSVNGVDVTGQKPHAIADQGMIR | T | 4 | 4176.0586 | 4178.0388 | 1.980142  | -2.0067 | -6.36  | 3.465 | 0.319 | 0.5 | 1  | 43 | 234 | 2 | 0 | 1 |
| Q5UZN1_HALMA | 1 | Branched-chain amino acid ABC transporter ATP-binding protein | <i>livG-6</i>   | rmAC2465 | 270  | 40.7 | 4 | 6 | 1      | K | STLFNLVSGFYEPDAGSVSVNGVDVTGQKPHAIADQGMIR | T | 4 | 4176.0586 | 4178.0509 | 1.992271  | -2.0067 | -3.46  | 3.945 | 0.363 | 0.1 | 1  | 41 | 234 | 2 | 0 | 1 |
| Q5UZZ6_HALMA | 1 | Putative oxidoreductase                                       | <i>glcD2</i>    | rmAC2334 | 1021 | 4.7  | 2 | 6 | 1      | K | SVEGVETMESIADAVTDLVVK                    | Y | 3 | 2191.093  | 2191.0942 | 0.001175  | 0       | 0.54   | 5.471 | 0.503 | 0   | 1  | 40 | 80  | 2 | 0 | 1 |
| Q5UZZ6_HALMA | 1 | Putative oxidoreductase                                       | <i>glcD2</i>    | rmAC2334 | 1021 | 4.7  | 2 | 6 | 0.9999 | M | ATDSGTTRIDPSADEVSNYDYQNETVAR             | S | 3 | 2973.3224 | 2974.3207 | 0.998276  | -1.0034 | -1.71  | 5.341 | 0.359 | 0   | 1  | 35 | 104 | 2 | 1 | 1 |
| Q5UZZ6_HALMA | 1 | Putative oxidoreductase                                       | <i>glcD2</i>    | rmAC2334 | 1021 | 4.7  | 2 | 6 | 1      | K | SVEGVETMESIADAVTDLVVK                    | Y | 3 | 2191.093  | 2191.0935 | 0.000442  | 0       | 0.20   | 5.607 | 0.443 | 0   | 1  | 39 | 80  | 2 | 0 | 1 |
| Q5UZZ6_HALMA | 1 | Putative oxidoreductase                                       | <i>glcD2</i>    | rmAC2334 | 1021 | 4.7  | 2 | 6 | 1      | K | SVEGVETMESIADAVTDLVVK                    | Y | 3 | 2191.093  | 2191.0933 | 0.000259  | 0       | 0.12   | 5.703 | 0.487 | 0   | 1  | 42 | 80  | 2 | 0 | 1 |
| Q5UZZ6_HALMA | 1 | Putative oxidoreductase                                       | <i>glcD2</i>    | rmAC2334 | 1021 | 4.7  | 2 | 6 | 1      | K | SVEGVETMESIADAVTDLVVK                    | Y | 3 | 2191.093  | 2191.0958 | 0.002823  | 0       | 1.29   | 5.738 | 0.449 | 0   | 1  | 37 | 80  | 2 | 0 | 1 |
| Q5UZZ6_HALMA | 1 | Putative oxidoreductase                                       | <i>glcD2</i>    | rmAC2334 | 1021 | 4.7  | 2 | 6 | 1      | K | SVEGVETMESIADAVTDLVVK                    | Y | 2 | 2191.093  | 2191.0982 | 0.005217  | 0       | 2.38   | 5.94  | 0.607 | 0   | 1  | 27 | 40  | 2 | 0 | 1 |
| Q5VOH2_HALMA | 1 | Hypothetical protein                                          | <i>rmAC2136</i> | rmAC2136 | 410  | 5.1  | 1 | 6 | 0.9989 | R | DLETTVPAELLGLVAVPVLVR                    | A | 3 | 2203.2827 | 2203.2793 | -0.003406 | 0       | -1.55  | 3.659 | 0.164 | 0.2 | 5  | 25 | 80  | 2 | 0 | 1 |
| Q5VOH2_HALMA | 1 | Hypothetical protein                                          | <i>rmAC2136</i> | rmAC2136 | 410  | 5.1  | 1 | 6 | 1      | R | DLETTVPAELLGLVAVPVLVR                    | A | 3 | 2203.2827 | 2203.2824 | -0.000293 | 0       | -0.13  | 4.457 | 0.353 | 0   | 1  | 35 | 80  | 2 | 0 | 1 |
| Q5VOH2_HALMA | 1 | Hypothetical protein                                          | <i>rmAC2136</i> | rmAC2136 | 410  | 5.1  | 1 | 6 | 1      | R | DLETTVPAELLGLVAVPVLVR                    | A | 3 | 2203.2827 | 2203.2832 | 0.00044   | 0       | 0.20   | 5.167 | 0.436 | 0   | 1  | 31 | 80  | 2 | 0 | 1 |
| Q5VOH2_HALMA | 1 | Hypothetical protein                                          | <i>rmAC2136</i> | rmAC2136 | 410  | 5.1  | 1 | 6 | 1      | R | DLETTVPAELLGLVAVPVLVR                    | A | 2 | 2203.2827 | 2203.286  | 0.003261  | 0       | 1.48   | 3.698 | 0.379 | 0   | 1  | 21 | 40  | 2 | 0 | 1 |
| Q5VOH2_HALMA | 1 | Hypothetical protein                                          | <i>rmAC2136</i> | rmAC2136 | 410  | 5.1  | 1 | 6 | 1      | R | DLETTVPAELLGLVAVPVLVR                    | A | 2 | 2203.2827 | 2203.2789 | -0.003819 | 0       | -1.73  | 3.461 | 0.393 | 0   | 1  | 17 | 40  | 2 | 0 | 1 |
| Q5VOH2_HALMA | 1 | Hypothetical protein                                          | <i>rmAC2136</i> | rmAC2136 | 410  | 5.1  | 1 | 6 | 1      | R | DLETTVPAELLGLVAVPVLVR                    | A | 3 | 2203.2827 | 2203.2888 | 0.006116  | 0       | 2.78   | 4.323 | 0.422 | 0   | 1  | 31 | 80  | 2 | 0 | 1 |
| Q5VOQ7_HALMA | 1 | Oligopeptide ABC transporter solute-binding protein           | <i>oppA</i>     | rmAC2039 | 649  | 7.4  | 3 | 6 | 1      | R | AEVAVDDIQEGGTLR                          | F | 2 | 1571.7791 | 1571.7774 | -0.001684 | 0       | -1.07  | 4.201 | 0.474 | 0   | 1  | 24 | 28  | 2 | 0 | 1 |
| Q5VOQ7_HALMA | 1 | Oligopeptide ABC transporter solute-binding protein           | <i>oppA</i>     | rmAC2039 | 649  | 7.4  | 3 | 6 | 1      | R | AEVAVDDIQEGGTLR                          | F | 2 | 1571.7791 | 1571.7763 | -0.002783 | 0       | -1.77  | 4.47  | 0.518 | 0   | 1  | 24 | 28  | 2 | 0 | 1 |
| Q5VOQ7_HALMA | 1 | Oligopeptide ABC transporter solute-binding protein           | <i>oppA</i>     | rmAC2039 | 649  | 7.4  | 3 | 6 | 1      | R | FSVEAVEDPAFRGEYDQVWR                     | G | 3 | 2527.1768 | 2527.1724 | -0.004439 | 0       | -1.76  | 4.253 | 0.439 | 0   | 1  | 35 | 80  | 2 | 1 | 1 |
| Q5VOQ7_HALMA | 1 | Oligopeptide ABC transporter solute-binding protein           | <i>oppA</i>     | rmAC2039 | 649  | 7.4  | 3 | 6 | 0.9999 | R | FSVEAVEDPAFRGEYDQVWR                     | G | 3 | 2527.1768 | 2527.1726 | -0.004256 | 0       | -1.68  | 3.258 | 0.281 | 0   | 1  | 31 | 80  | 2 | 1 | 1 |
| Q5VOQ7_HALMA | 1 | Oligopeptide ABC transporter solute-binding protein           | <i>oppA</i>     | rmAC2039 | 649  | 7.4  | 3 | 6 | 0.9998 | R | FSVEAVEDPAFRGEYDQVWR                     | G | 3 | 2527.1768 | 2527.1762 | -0.000594 | 0       | -0.24  | 3.352 | 0.263 | 0   | 1  | 36 | 80  | 2 | 1 | 1 |
| Q5VOQ7_HALMA | 1 | Oligopeptide ABC transporter solute-binding protein           | <i>oppA</i>     | rmAC2039 | 649  | 7.4  | 3 | 6 | 0.9998 | D | PTSQQVAVYLDRE                            | - | 2 | 1433.6786 | 1433.6789 | 0.000305  | 0       | 0.21   | 3.739 | 0.471 | 0   | 1  | 18 | 22  | 1 | 1 | 1 |
| Q5VID8_HALMA | 1 | Sodium-solute symporter putative                              | <i>putP-2</i>   | rmAC1769 | 502  | 6.2  | 4 | 6 | 1      | R | IREVMPAGHSLTEFAYAR                       | F | 3 | 2047.0309 | 2047.0303 | -0.000629 | 0       | -0.31  | 4.068 | 0.355 | 0   | 1  | 31 | 68  | 2 | 1 | 1 |
| Q5VID8_HALMA | 1 | Sodium-solute symporter putative                              | <i>putP-2</i>   | rmAC1769 | 502  | 6.2  | 4 | 6 | 1      | R | EVMPAGHSLTEFAYAR                         | F | 2 | 1777.8457 | 1777.8482 | 0.002516  | 0       | 1.42   | 3.527 | 0.577 | 0   | 1  | 21 | 30  | 2 | 0 | 1 |
| Q5VID8_HALMA | 1 | Sodium-solute symporter putative                              | <i>putP-2</i>   | rmAC1769 | 502  | 6.2  | 4 | 6 | 1      | R | EVMPAGHSLTEFAYAR                         | F | 2 | 1777.8457 | 1777.8462 | 0.000441  | 0       | 0.25   | 3.822 | 0.592 | 0   | 1  | 22 | 30  | 2 | 0 | 1 |
| Q5VID8_HALMA | 1 | Sodium-solute symporter putative                              | <i>putP-2</i>   | rmAC1769 | 502  | 6.2  | 4 | 6 | 1      | R | GRIDSVETYISAR                            | D | 3 | 1465.7525 | 1465.7526 | 0.000122  | 0       | 0.08   | 3.084 | 0.335 | 0.1 | 1  | 23 | 48  | 2 | 1 | 1 |
| Q5VID8_HALMA | 1 | Sodium-solute symporter putative                              | <i>putP-2</i>   | rmAC1769 | 502  | 6.2  | 4 | 6 | 1      | R | IDSVETYISAR                              | D | 2 | 1252.6299 | 1252.6054 | -0.024476 | 0       | -19.54 | 3.185 | 0.442 | 0   | 1  | 18 | 20  | 2 | 0 | 1 |
| Q5VIF5_HALMA | 1 | Glutamine ABC transporter ATP-binding protein                 | <i>gluQ1</i>    | rmAC1747 | 250  | 32.4 | 3 | 6 | 1      | K | LLLFDEPTSLDPELVGEVVEVMR                  | D | 3 | 2670.3826 | 2670.3848 | 0.002224  | 0       | 0.83   | 4.892 | 0.429 | 0   | 1  | 37 | 92  | 2 | 0 | 2 |
| Q5VIF5_HALMA | 1 | Glutamine ABC transporter ATP-binding protein                 | <i>gluQ1</i>    | rmAC1747 | 250  | 32.4 | 3 | 6 | 1      | K | GYEHLVEQLLLDQADSYPALSGGQK                | Q | 3 | 2803.33   | 2804.3182 | 0.988147  | -1.0034 | -5.42  | 6.764 | 0.539 | 0   | 1  | 39 | 100 | 2 | 1 | 1 |
| Q5VIF5_HALMA | 1 | Glutamine ABC transporter ATP-binding protein                 | <i>gluQ1</i>    | rmAC1747 | 250  | 32.4 | 3 | 6 | 1      | K | LLLFDEPTSLDPELVGEVVEVMR                  | D | 3 | 2670.3826 | 2670.3872 | 0.004605  | 0       | 1.72   | 3.87  | 0.384 | 0   | 1  | 28 | 92  | 2 | 0 | 2 |
| Q5VIF5_HALMA | 1 | Glutamine ABC transporter ATP-binding protein                 | <i>gluQ1</i>    | rmAC1747 | 250  | 32.4 | 3 | 6 | 1      | K | LLLFDEPTSLDPELVGEVVEVMR                  | D | 2 | 2670.3826 | 2670.3836 | 0.001017  | 0       | 0.38   | 5.388 | 0.473 | 0   | 1  | 29 | 46  | 2 | 0 | 2 |
| Q5VIF5_HALMA | 1 | Glutamine ABC transporter ATP-binding protein                 | <i>gluQ1</i>    | rmAC1747 | 250  | 32.4 | 3 | 6 | 1      | R | SAASDIIFLDDGRIVEHGHPPEQLFENPQAAR         | T | 4 | 3391.6797 | 3391.6879 | 0.008212  | 0       | 2.42   | 4.568 | 0.28  | 0   | 1  | 43 | 180 | 2 | 1 | 1 |
| Q5VIF5_HALMA | 1 | Glutamine ABC transporter ATP-binding protein                 | <i>gluQ1</i>    | rmAC1747 | 250  | 32.4 | 3 | 6 | 1      | R | SAASDIIFLDDGRIVEHGHPPEQLFENPQAAR         | T | 4 | 3391.6797 | 3393.6909 | 2.011171  | -2.0067 | 1.32   | 4.967 | 0.379 | 0   | 1  | 49 | 180 | 2 | 1 | 1 |
| Q5VIJ9_HALMA | 1 | Hypothetical protein                                          | <i>rmAC1696</i> | rmAC1696 | 618  | 9.2  | 3 | 6 | 1      | R | SFDMHLHGAGQLGSLLLDAETGQLR                | C | 3 | 2516.2329 | 2516.2564 | 0.023445  | 0       | 9.32   | 4.529 | 0.327 | 0   | 1  | 32 | 92  | 2 | 0 | 1 |
| Q5VIJ9_HALMA | 1 | Hypothetical protein                                          | <i>rmAC1696</i> | rmAC1696 | 618  | 9.2  | 3 | 6 | 1      | R | FLPMLHGPMPGMEIGGGNLR                     | R | 3 | 2188.1285 | 2188.1262 | -0.002282 | 0       | -1.04  | 2.887 | 0.426 | 0   | 1  | 33 | 80  | 2 | 0 | 1 |
| Q5VIJ9_HALMA | 1 | Hypothetical protein                                          | <i>rmAC1696</i> | rmAC1696 | 618  | 9.2  | 3 | 6 | 1      | R | SFDMHLHGAGQLGSLLLDAETGQLR                | C | 3 | 2516.2329 | 2517.2482 | 1.015247  | -1.0034 | 4.73   | 4.059 | 0.257 | 0   | 1  | 27 | 92  | 2 | 0 | 1 |
| Q5VIJ9_HALMA | 1 | Hypothetical protein                                          | <i>rmAC1696</i> | rmAC1696 | 618  | 9.2  | 3 | 6 | 1      | R | SFDMHLHGAGQLGSLLLDAETGQLR                | C | 3 | 2516.2329 | 2516.2489 | 0.015938  | 0       | 6.33   | 4.167 | 0.318 | 0   | 1  | 31 | 92  | 2 | 0 | 1 |
| Q5VIJ9_HALMA | 1 | Hypothetical protein                                          | <i>rmAC1696</i> | rmAC1696 | 618  | 9.2  | 3 | 6 | 0.9999 | R | SSLGVSALDFLR                             | G | 2 | 1263.6823 | 1263.6793 | -0.003029 | 0       | -2.40  | 2.843 | 0.264 | 0   | 1  | 18 | 22  | 2 | 0 | 1 |
| Q5VIJ9_HALMA | 1 | Hypothetical protein                                          | <i>rmAC1696</i> | rmAC1696 | 618  | 9.2  | 3 | 6 | 0.9998 | R | SSLGVSALDFLR                             | G | 2 | 1263.6823 | 1263.6832 | 0.000877  | 0       | 0.69   | 2.777 | 0.244 | 0   | 1  | 18 | 22  |   |   |   |

|              |   |                                  |          |          |     |      |   |   |        |   |                                     |   |   |           |           |           |         |       |       |       |     |    |    |     |   |   |   |  |
|--------------|---|----------------------------------|----------|----------|-----|------|---|---|--------|---|-------------------------------------|---|---|-----------|-----------|-----------|---------|-------|-------|-------|-----|----|----|-----|---|---|---|--|
| Q5V443_HALMA | 1 | Universal stress protein         | usp6     | rmAC0716 | 288 | 27.8 | 3 | 6 | 0.9985 | K | AVETAATHGPIFYQAILDAIEDTDADLVVIGTHGR | T | 4 | 3573.8315 | 3574.8509 | 1.019371  | -1.0034 | 4.48  | 3.479 | 0.181 | 0.2 | 3  | 40 | 198 | 2 | 0 | 1 |  |
| Q5V443_HALMA | 1 | Universal stress protein         | usp6     | rmAC0716 | 288 | 27.8 | 3 | 6 | 0.9996 | R | SLGHDVGSTVIVDELESVATDAVEDGSDQLTK    | M | 3 | 3261.5987 | 3262.5982 | 0.999447  | -1.0034 | -1.20 | 3.806 | 0.245 | 0.1 | 43 | 24 | 124 | 2 | 0 | 1 |  |
| Q5V4X8_HALMA | 1 | 4-aminobutyrate aminotransferase | gabT     | rmAC0382 | 440 | 20.7 | 5 | 6 | 0.9999 | K | MLDRADEFDMDVPLK                     | I | 3 | 1793.8328 | 1793.8242 | -0.008645 | 0       | -4.82 | 3.7   | 0.226 | 0.1 | 1  | 28 | 56  | 2 | 1 | 1 |  |
| Q5V4X8_HALMA | 1 | 4-aminobutyrate aminotransferase | gabT     | rmAC0382 | 440 | 20.7 | 5 | 6 | 1      | R | GLGLMTALEFDTADRR                    | D | 3 | 1764.8828 | 1764.8807 | -0.002126 | 0       | -1.20 | 2.758 | 0.332 | 0   | 1  | 23 | 60  | 2 | 0 | 1 |  |
| Q5V4X8_HALMA | 1 | 4-aminobutyrate aminotransferase | gabT     | rmAC0382 | 440 | 20.7 | 5 | 6 | 1      | R | SKLDADDTGHIPPEEVAFLILEPIQEGGGYR     | V | 4 | 3250.651  | 3252.6509 | 1.999871  | -2.0067 | -2.10 | 4.466 | 0.422 | 0   | 1  | 46 | 174 | 2 | 1 | 1 |  |
| Q5V4X8_HALMA | 1 | 4-aminobutyrate aminotransferase | gabT     | rmAC0382 | 440 | 20.7 | 5 | 6 | 1      | K | YGITFDGAFHGR                        | T | 3 | 1339.6309 | 1339.63   | -0.000959 | 0       | -0.72 | 2.947 | 0.381 | 0   | 1  | 19 | 44  | 2 | 0 | 1 |  |
| Q5V4X8_HALMA | 1 | 4-aminobutyrate aminotransferase | gabT     | rmAC0382 | 440 | 20.7 | 5 | 6 | 0.9998 | K | YGITFDGAFHGR                        | T | 3 | 1339.6309 | 1339.6282 | -0.002753 | 0       | -2.06 | 2.427 | 0.261 | 0   | 1  | 21 | 44  | 2 | 0 | 1 |  |
| Q5V5F3_HALMA | 1 | Hypothetical protein             | rmAC0185 | rmAC0185 | 238 | 16.4 | 3 | 6 | 1      | R | ETEPAGVGTSEMGAETLER                 | E | 2 | 1962.884  | 1962.8854 | 0.001424  | 0       | 0.73  | 3.045 | 0.433 | 0   | 1  | 18 | 36  | 2 | 0 | 1 |  |
| Q5V5F3_HALMA | 1 | Hypothetical protein             | rmAC0185 | rmAC0185 | 238 | 16.4 | 3 | 6 | 0.9982 | K | IDPAPLLGA AFL                       | I | 2 | 1196.6805 | 1196.6823 | 0.001823  | 0       | 1.52  | 2.819 | 0.359 | 0   | 2  | 15 | 22  | 1 | 0 | 1 |  |
| Q5V5F3_HALMA | 1 | Hypothetical protein             | rmAC0185 | rmAC0185 | 238 | 16.4 | 3 | 6 | 1      | K | IDPAPLLGA AFL LSSALGR               | W | 2 | 1994.1564 | 1994.1516 | -0.004839 | 0       | -2.43 | 4.711 | 0.525 | 0   | 1  | 25 | 38  | 2 | 0 | 1 |  |
| Q5V5F3_HALMA | 1 | Hypothetical protein             | rmAC0185 | rmAC0185 | 238 | 16.4 | 3 | 6 | 1      | K | IDPAPLLGA AFL LSSALGR               | W | 3 | 1994.1564 | 1994.1547 | -0.001678 | 0       | -0.84 | 4.953 | 0.359 | 0   | 1  | 33 | 76  | 2 | 0 | 1 |  |
| Q5V5F3_HALMA | 1 | Hypothetical protein             | rmAC0185 | rmAC0185 | 238 | 16.4 | 3 | 6 | 1      | K | IDPAPLLGA AFL LSSALGR               | W | 3 | 1994.1564 | 1994.156  | -0.000397 | 0       | -0.20 | 4.404 | 0.335 | 0.1 | 1  | 31 | 76  | 2 | 0 | 1 |  |
| Q5V5F3_HALMA | 1 | Hypothetical protein             | rmAC0185 | rmAC0185 | 238 | 16.4 | 3 | 6 | 1      | K | IDPAPLLGA AFL LSSALGR               | W | 3 | 1994.1564 | 1994.1564 | -0.00003  | 0       | -0.02 | 4.308 | 0.299 | 0   | 1  | 31 | 76  | 2 | 0 | 1 |  |
| Q5V6H7_HALMA | 1 | Na+ H+ antiporter                | nhaC4    | pNG7169  | 488 | 8.4  | 2 | 6 | 1      | K | QSPSLDTTNLASAVTNTLDYDHINAMR         | A | 3 | 2963.3981 | 2963.3906 | -0.007538 | 0       | -2.54 | 4.184 | 0.404 | 0   | 1  | 25 | 104 | 2 | 0 | 1 |  |
| Q5V6H7_HALMA | 1 | Na+ H+ antiporter                | nhaC4    | pNG7169  | 488 | 8.4  | 2 | 6 | 1      | K | QSPSLDTTNLASAVTNTLDYDHINAMR         | A | 3 | 2963.3981 | 2963.3902 | -0.007905 | 0       | -2.67 | 4.756 | 0.515 | 0   | 1  | 34 | 104 | 2 | 0 | 1 |  |
| Q5V6H7_HALMA | 1 | Na+ H+ antiporter                | nhaC4    | pNG7169  | 488 | 8.4  | 2 | 6 | 1      | K | QSPSLDTTNLASAVTNTLDYDHINAMR         | A | 3 | 2947.3981 | 2948.4082 | 1.010047  | -1.0034 | 2.27  | 5.16  | 0.561 | 0   | 1  | 34 | 104 | 2 | 0 | 1 |  |
| Q5V6H7_HALMA | 1 | Na+ H+ antiporter                | nhaC4    | pNG7169  | 488 | 8.4  | 2 | 6 | 0.974  | K | QSPSLDTTNLASAVTNTLDYDHINAMR         | A |   |           |           |           |         |       |       |       |     |    |    |     |   |   |   |  |

|              |   |                                                    |          |          |     |      |   |   |        |   |                                    |   |   |           |           |           |         |        |       |       |     |    |    |     |   |   |     |
|--------------|---|----------------------------------------------------|----------|----------|-----|------|---|---|--------|---|------------------------------------|---|---|-----------|-----------|-----------|---------|--------|-------|-------|-----|----|----|-----|---|---|-----|
| Q5UXS3_HALMA | 1 | Putative acetyl-coenzyme A synthetase (EC 6.2.1.1) | acs5     | rmAC3228 | 664 | 10.5 | 4 | 5 | 1      | R | RGDPLDHLDKANEGLSGVDHEVER           | A | 4 | 2657.2793 | 2657.2761 | -0.003254 | 0       | -1.22  | 3.903 | 0.488 | 0   | 1  | 43 | 138 | 2 | 1 | 1   |
| Q5UXS3_HALMA | 1 | Putative acetyl-coenzyme A synthetase (EC 6.2.1.1) | acs5     | rmAC3228 | 664 | 10.5 | 4 | 5 | 1      | R | RGDPLDHLDKANEGLSGVDHEVER           | A | 4 | 2657.2793 | 2657.2858 | 0.006512  | 0       | 2.45   | 4.054 | 0.403 | 0   | 1  | 44 | 138 | 2 | 1 | 1   |
| Q5UXU7_HALMA | 1 | Hypothetical protein                               | rmAC3202 | rmAC3202 | 602 | 14.3 | 4 | 5 | 0.9995 | K | QKVELWYNPEDESFPNVKLLDK             | S | 4 | 2674.3279 | 2675.3361 | 1.008205  | -1.0034 | 1.82   | 3.405 | 0.202 | 0.1 | 1  | 38 | 126 | 2 | 2 | 1   |
| Q5UXU7_HALMA | 1 | Hypothetical protein                               | rmAC3202 | rmAC3202 | 602 | 14.3 | 4 | 5 | 1      | K | DYDPDTFRVDIYNAPVADDDRRRPLAR        | E | 4 | 3266.5228 | 3267.5309 | 1.008071  | -1.0034 | 1.45   | 4.309 | 0.354 | 0   | 1  | 41 | 162 | 2 | 2 | 1   |
| Q5UXU7_HALMA | 1 | Hypothetical protein                               | rmAC3202 | rmAC3202 | 602 | 14.3 | 4 | 5 | 0.9988 | L | KIEEAFENKHLYLSLETDPYHK             | L | 4 | 2677.3024 | 2677.3034 | 0.00099   | 0       | 0.37   | 3.04  | 0.133 | 1.1 | 2  | 33 | 126 | 2 | 1 | 1   |
| Q5UXU7_HALMA | 1 | Hypothetical protein                               | rmAC3202 | rmAC3202 | 602 | 14.3 | 4 | 5 | 1      | R | YHNSPEESIHLELFK                    | N | 3 | 1704.8359 | 1704.8344 | -0.001552 | 0       | -0.91  | 4.332 | 0.364 | 0   | 1  | 28 | 52  | 2 | 0 | 1   |
| Q5UXU7_HALMA | 1 | Hypothetical protein                               | rmAC3202 | rmAC3202 | 602 | 14.3 | 4 | 5 | 0.9999 | N | YHNSPEESIHLELFK                    | N | 3 | 1704.8359 | 1704.8369 | 0.001012  | 0       | 0.59   | 2.832 | 0.251 | 0.2 | 1  | 22 | 52  | 2 | 0 | 1   |
| Q5UZA3_HALMA | 1 | Hypothetical protein                               | rmAC2611 | rmAC2611 | 245 | 16.7 | 4 | 5 | 0.9985 | R | AWAALEHAVAPER                      | S | 3 | 1575.827  | 1576.8382 | 1.011147  | -1.0034 | 4.95   | 2.581 | 0.205 | 0.7 | 1  | 27 | 52  | 2 | 0 | 1   |
| Q5UZA3_HALMA | 1 | Hypothetical protein                               | rmAC2611 | rmAC2611 | 245 | 16.7 | 4 | 5 | 0.9999 | R | AWAALEHAVAPER                      | S | 3 | 1575.827  | 1575.8267 | -0.000342 | 0       | -0.22  | 2.543 | 0.287 | 0.1 | 1  | 27 | 52  | 2 | 0 | 1   |
| Q5UZA3_HALMA | 1 | Hypothetical protein                               | rmAC2611 | rmAC2611 | 245 | 16.7 | 4 | 5 | 0.9932 | R | AWAALEHAVAPER                      | S | 3 | 1575.827  | 1575.8263 | -0.000708 | 0       | -0.45  | 2.452 | 0.145 | 1.1 | 2  | 24 | 52  | 2 | 0 | 1   |
| Q5UZA3_HALMA | 1 | Hypothetical protein                               | rmAC2611 | rmAC2611 | 245 | 16.7 | 4 | 5 | 0.9986 | Y | RAWAALEHAVAPER                     | R | 3 | 1575.827  | 1575.8256 | -0.001441 | 0       | -0.91  | 3.907 | 0.305 | 0   | 1  | 28 | 52  | 1 | 1 | 1   |
| Q5UZA3_HALMA | 1 | Hypothetical protein                               | rmAC2611 | rmAC2611 | 245 | 16.7 | 4 | 5 | 1      | R | TIDETGGETPAVATAESAR                | Q | 2 | 1874.8857 | 1874.8869 | 0.001213  | 0       | 0.65   | 5.526 | 0.591 | 0   | 1  | 26 | 36  | 2 | 0 | 1   |
| Q5UZD2_HALMA | 1 | Hypothetical protein                               | rmAC2578 | rmAC2578 | 897 | 6.2  | 3 | 5 | 1      | K | AIVPFAFHVTPGIILR                   | R | 3 | 1839.1386 | 1839.1353 | -0.003348 | 0       | -1.82  | 4.684 | 0.322 | 0   | 1  | 31 | 64  | 2 | 0 | 1   |
| Q5UZD2_HALMA | 1 | Hypothetical protein                               | rmAC2578 | rmAC2578 | 897 | 6.2  | 3 | 5 | 1      | K | AIVPFAFHVTPGIILR                   | R | 2 | 1839.1386 | 1839.1393 | 0.000632  | 0       | 0.34   | 4.44  | 0.446 | 0   | 1  | 24 | 32  | 2 | 0 | 1   |
| Q5UZD2_HALMA | 1 | Hypothetical protein                               | rmAC2578 | rmAC2578 | 897 | 6.2  | 3 | 5 | 1      | K | SDAFETGIEAFSLSLNK                  | A | 2 | 1827.889  | 1828.8854 | 0.996424  | -1.0034 | -3.79  | 4.578 | 0.183 | 0   | 1  | 21 | 32  | 2 | 0 | 1   |
| Q5UZD2_HALMA | 1 | Hypothetical protein                               | rmAC2578 | rmAC2578 | 897 | 6.2  | 3 | 5 | 1      | K | SDAFETGIEAFSLSLNK                  | A | 2 | 1827.889  | 1827.8822 | -0.006848 | 0       | -3.75  | 4.039 | 0.457 | 0   | 1  | 21 | 32  | 2 | 0 | 1   |
| Q5UZD2_HALMA | 1 | Hypothetical protein                               | rmAC2578 | rmAC2578 | 897 | 6.2  | 3 | 5 | 1      | R | SDDDGAEVSDDEEDEVLQEIER             | K | 2 | 2477.0565 | 2476.9986 | -0.057893 | 0       | -23.37 | 4.392 | 0.167 | 0   | 1  | 20 | 42  | 2 | 0 | 1   |
| Q5UZD8_HALMA | 1 | Hypothetical protein                               | rmAC2571 | rmAC2571 | 55  | 60   | 1 | 5 | 1      | K | AAVKEELNDMNVASDFYDALDEEVEELLQDAAR  | R | 3 | 3727.7098 | 3727.7078 | -0.002039 | 0       | -0.55  | 6.953 | 0.581 | 0   | 1  | 44 | 128 | 2 | 1 | 1   |
| Q5UZD8_HALMA | 1 | Hypothetical protein                               | rmAC2571 | rmAC2571 | 55  | 60   | 1 | 5 | 1      | K | AAVKEELNDMNVASDFYDALDEEVEELLQDAAR  | R | 3 | 3711.7098 | 3711.7099 | 0.000037  | 0       | 0.01   | 7.447 | 0.553 | 0   | 1  | 44 | 128 | 2 | 1 | 1   |
| Q5UZD8_HALMA | 1 | Hypothetical protein                               | rmAC2571 | rmAC2571 | 55  | 60   | 1 | 5 | 1      | K | AAVKEELNDMNVASDFYDALDEEVEELLQDAAR  | R | 3 | 3711.7098 | 3713.7082 | 1.998347  | -2.0067 | -2.25  | 6.563 | 0.516 | 0   | 1  | 36 | 128 | 2 | 1 | 1   |
| Q5UZD8_HALMA | 1 | Hypothetical protein                               | rmAC2571 | rmAC2571 | 55  | 60   | 1 | 5 | 1      | K | AAVKEELNDMNVASDFYDALDEEVEELLQDAAR  | R | 3 | 3727.7098 | 3727.7052 | -0.004602 | 0       | -1.23  | 6.204 | 0.595 | 0   | 1  | 44 | 128 | 2 | 1 | 1   |
| Q5UZD8_HALMA | 1 | Hypothetical protein                               | rmAC2571 | rmAC2571 | 55  | 60   | 1 | 5 | 1      | K | AAVKEELNDMNVASDFYDALDEEVEELLQDAAR  | R | 3 | 3727.7098 | 3728.7082 | 0.998347  | -1.0034 | -1.34  | 6.037 | 0.572 | 0   | 1  | 41 | 128 | 2 | 1 | 1   |
| Q5UZH5_HALMA | 1 | Hypothetical protein                               | rmAC2525 | rmAC2525 | 244 | 23   | 4 | 5 | 1      | R | FLDDIDHSAYGTSPQQLR                 | D | 3 | 2061.9756 | 2061.9702 | -0.005388 | 0       | -2.61  | 3.883 | 0.359 | 0   | 1  | 31 | 68  | 2 | 0 | 1   |
| Q5UZH5_HALMA | 1 | Hypothetical protein                               | rmAC2525 | rmAC2525 | 244 | 23   | 4 | 5 | 1      | R | FLDDIDHSAYGTSPQQLR                 | D | 3 | 2061.9756 | 2061.9744 | -0.001176 | 0       | -0.57  | 3.223 | 0.268 | 0.1 | 1  | 30 | 68  | 2 | 0 | 1   |
| Q5UZH5_HALMA | 1 | Hypothetical protein                               | rmAC2525 | rmAC2525 | 244 | 23   | 4 | 5 | 0.9982 | R | GGLDLDALR                          | M | 2 | 928.4978  | 928.536   | 0.038222  | 0       | 41.17  | 2.718 | 0.121 | 0.5 | 3  | 13 | 16  | 2 | 0 | 1   |
| Q5UZH5_HALMA | 1 | Hypothetical protein                               | rmAC2525 | rmAC2525 | 244 | 23   | 4 | 5 | 1      | R | RLPTSLPAPVPNDPGDGSLAT              | D | 2 | 1977.0167 | 1978.0167 | 0.999974  | -1.0034 | -1.71  | 3.692 | 0.521 | 0   | 1  | 20 | 38  | 1 | 0 | 1   |
| Q5UZQ1_HALMA | 1 | Hypothetical protein                               | rmAC2443 | rmAC2443 | 324 | 16   | 4 | 5 | 1      | R | VGPIEATVTDALGLIK                   | E | 3 | 1595.9134 | 1596.9082 | 0.994747  | -1.0034 | -5.39  | 5.265 | 0.426 | 0   | 1  | 34 | 60  | 2 | 0 | 1   |
| Q5UZQ1_HALMA | 1 | Hypothetical protein                               | rmAC2443 | rmAC2443 | 324 | 16   | 4 | 5 | 0.9934 | R | LLELLAR                            | A | 2 | 826.5276  | 826.5254  | -0.002176 | 0       | -2.63  | 1.923 | 0.152 | 1.4 | 2  | 11 | 12  | 2 | 0 | 1   |
| Q5UZQ1_HALMA | 1 | Hypothetical protein                               | rmAC2443 | rmAC2443 | 324 | 16   | 4 | 5 | 1      | R | VGPIEATVTDALGLIK                   | E | 2 | 1595.9134 | 1595.909  | -0.004393 | 0       | -2.75  | 4.32  | 0.625 | 0   | 1  | 24 | 30  | 2 | 0 | 1   |
| Q5UZQ1_HALMA | 1 | Hypothetical protein                               | rmAC2443 | rmAC2443 | 324 | 16   | 4 | 5 | 0.9708 | R | WSGAPTVELGHLR                      | R | 3 | 1421.7415 | 1421.7382 | -0.003313 | 0       | -2.33  | 2.466 | 0.124 | 1.2 | 25 | 20 | 48  | 2 | 0 | 1   |
| Q5VOE9_HALMA | 1 | Putative DNA binding protein                       | rmAC2160 | rmAC2160 | 219 | 13.7 | 3 | 5 | 1      | R | EVLLALLNR                          | G | 2 | 1039.639  | 1039.6454 | 0.006424  | 0       | 6.18   | 2.792 | 0.281 | 0   | 1  | 15 | 16  | 2 | 0 | 1   |
| Q5VOE9_HALMA | 1 | Putative DNA binding protein                       | rmAC2160 | rmAC2160 | 219 | 13.7 | 3 | 5 | 0.9956 | R | EVLLALLNR                          | G | 2 | 1039.639  | 1039.6454 | 0.006424  | 0       | 6.18   | 2.132 | 0.152 | 0.3 | 1  | 12 | 16  | 2 | 0 | 1   |
| Q5VOE9_HALMA | 1 | Putative DNA binding protein                       | rmAC2160 | rmAC2160 | 219 | 13.7 | 3 | 5 | 0.9998 | - | MIVEFHIDAPLLQR                     | T | 3 | 1680.9021 | 1680.8997 | -0.002383 | 0       | -1.42  | 2.928 | 0.219 | 0   | 1  | 28 | 52  | 2 | 0 | 1   |
| Q5VOE9_HALMA | 1 | Putative DNA binding protein                       | rmAC2160 | rmAC2160 | 219 | 13.7 | 3 | 5 | 0.9983 | - | MIVEFHIDAPLLQR                     | T | 3 | 1680.9021 | 1680.9018 | -0.000369 | 0       | -0.22  | 2.563 | 0.212 | 0.3 | 8  | 20 | 52  | 2 | 0 | 1   |
| Q5VOK8_HALMA | 1 | Probable carboxypeptidase                          | cxp      | rmAC2092 | 500 | 4    | 1 | 5 | 0.9999 | K | AEDDDFAFADTLEELVELRR               | E | 3 | 2353.1074 | 2353.1099 | 0.002522  | 0       | 1.07   | 2.446 | 0.307 | 0.1 | 1  | 25 | 76  | 2 | 0 | 1   |
| Q5VOK8_HALMA | 1 | Probable carboxypeptidase                          | cxp      | rmAC2092 | 500 | 4    | 1 | 5 | 1      | K | AEDDDFAFADTLEELVELRR               | E | 3 | 2353.1074 | 2353.1092 | 0.00179   | 0       | 0.76   | 3.034 | 0.442 | 0   | 1  | 27 | 76  | 2 | 0 | 1   |
| Q5VOK8_HALMA | 1 | Probable carboxypeptidase                          | cxp      | rmAC2092 | 500 | 4    | 1 | 5 | 1      | K | AEDDDFAFADTLEELVELRR               | E | 3 | 2353.1074 | 2353.1039 | -0.003521 | 0       | -1.50  | 2.508 | 0.383 | 0   | 1  | 30 | 76  | 2 | 0 | 1   |
| Q5VOK8_HALMA | 1 | Probable carboxypeptidase                          | cxp      | rmAC2092 | 500 | 4    | 1 | 5 | 0.9998 | K | AEDDDFAFADTLEELVELRR               | E | 3 | 2353.1074 | 2353.1088 | 0.001423  | 0       | 0.60   | 2.38  | 0.292 | 0   | 1  | 26 | 76  | 2 | 0 | 1   |
| Q5VOK8_HALMA | 1 | Probable carboxypeptidase                          | cxp      | rmAC2092 | 500 | 4    | 1 | 5 | 0.9996 | K | AEDDDFAFADTLEELVELRR               | E | 4 | 2353.1074 | 2354.1047 | 0.99726   | -1.0034 | -2.59  | 3.126 | 0.195 | 0.2 | 1  | 35 | 114 | 2 | 0 | 1   |
| Q5VIC0_HALMA | 1 | Histidine ammonia-lyase (EC 4.3.1.3)               | hutH     | rmAC1791 | 549 | 7.1  | 2 | 5 | 1      | R | ESVVDLVVAMLDSGVHPVPVPSR            | G | 3 | 2318.2304 | 2318.2309 | 0.000494  | 0       | 0.21   | 3.482 | 0.371 | 0   | 2  | 24 | 84  | 2 | 0 | 1   |
| Q5VIC0_HALMA | 1 | Histidine ammonia-lyase (EC 4.3.1.3)               | hutH     | rmAC1791 | 549 | 7.1  | 2 | 5 | 1      | R | ESVVDLVVAMLDSGVHPVPVPSR            | G | 3 | 2318.2304 | 2318.2333 | 0.002874  | 0       | 1.24   | 4.031 | 0.51  | 0   | 1  | 30 | 84  | 2 | 0 | 1   |
| Q5VIC0_HALMA | 1 | Histidine ammonia-lyase (EC 4.3.1.3)               | hutH     | rmAC1791 | 549 | 7.1  | 2 | 5 | 1      | R | ESVVDLVVAMLDSGVHPVPVPSR            | G | 3 | 2318.2304 | 2318.2274 | -0.002985 | 0       | -1.29  | 4.318 | 0.576 | 0   | 1  | 30 | 84  | 2 | 0 | 1   |
| Q5VIC0_HALMA | 1 | Histidine ammonia-lyase (EC 4.3.1.3)               | hutH     | rmAC1791 | 549 | 7.1  | 2 | 5 | 1      | R | LDYLTNALTELAASIER                  | R | 3 | 1891.9891 | 1891.9889 | -0.000272 | 0       | -0.14  | 3.969 | 0.295 | 0   | 1  | 30 | 64  | 2 | 0 | 1   |
| Q5VIC0_HALMA | 1 | Histidine ammonia-lyase (EC 4.3.1.3)               | hutH     | rmAC1791 | 549 | 7.1  | 2 | 5 | 1      | R | LDYLTNALTELAASIER                  | R | 3 | 1891.9891 | 1893.9982 | 2.009047  | -2.0067 | 1.24   | 4.434 | 0.326 | 0   | 1  | 29 | 64  | 2 | 0 | 1   |
| Q5V1F6_HALMA | 1 | Amino acid ABC transporter permease protein        | yckA-2   | rmAC1745 | 326 | 9.5  | 3 | 5 | 1      | R | SLALGYTELFR                        | G | 2 | 1268.6765 | 1268.6854 | 0.008924  | 0       | 7.03   | 3.545 | 0.496 | 0   | 1  | 17 | 20  | 2 | 0 | 1   |
| Q5V1F6_HALMA | 1 | Amino acid ABC transporter permease protein        | yckA-2   | rmAC1745 | 326 | 9.5  | 3 | 5 | 0.9994 | Y | RVHVLPGQLR                         | Y | 2 | 1017.6083 | 1017.6075 | -0.000867 | 0       | -0.85  | 2.246 | 0.219 | 0   | 1  | 12 | 16  | 2 | 0 | 1   |
| Q5V1F6_HALMA | 1 | Amino acid ABC transporter permease protein        | yckA-2   | rmAC1745 | 326 | 9.5  | 3 | 5 | 0.9983 | R | HVVLPGQLR                          | Y | 2 | 1017.6083 | 1017.607  | -0.001355 | 0       | -1.33  | 2.05  | 0.231 | 0   | 3  | 11 | 16  | 2 | 0 | 1   |
| Q5V1F6_HALMA | 1 | Amino acid ABC transporter permease protein        | yckA-2   | rmAC1745 | 326 | 9.5  | 3 | 5 | 0.9981 | R | HVVLPGQLR                          | Y | 2 | 1017.6083 | 1017.6063 | -0.002027 | 0       | -1.99  | 2.033 | 0.201 | 0   | 1  | 11 | 16  | 2 | 0 | 1   |
| Q5V1F6_HALMA | 1 | Amino acid ABC transporter permease protein        | yckA-2   | rmAC1745 | 326 | 9.5  | 3 | 5 | 0.999  | K | YSSLASFITVR                        | E | 2 | 1242.6608 | 1242.6592 | -0.00167  | 0       | -1.34  | 2.117 | 0.234 | 0.1 | 1  | 15 | 20  | 2 | 0 | 1   |
| Q5V3A8_HALMA | 1 | ABC transporter ATP-binding protein                | rmAC1029 | rmAC1029 | 254 | 20.1 | 2 | 5 | 1      | K | STLFNVLLGLEPPSSGR                  | L | 3 | 1785.9625 | 1785.9616 | -0.000894 | 0       | -0.50  | 2.387 | 0.144 | 0.9 | 4  | 21 | 64  | 2 | 0 | 1   |
| Q5V3A8_HALMA | 1 | ABC transporter ATP-binding protein                | rmAC1029 | rmAC1029 | 254 | 20.1 | 2 | 5 | 1      | R | ALANRPFIILADEPTGQLDPDTAESVLNLLFSMK | E | 3 | 3680.8971 | 3682.8982 | 2.001047  | -2.0067 | -1.54  | 8.143 | 0.57  | 0   | 1  | 53 | 132 | 2 | 0 | 1</ |

|                  |        |                                                                                    |                  |          |     |      |   |   |        |   |                                |           |           |           |           |           |         |        |       |       |     |     |    |     |   |   |   |
|------------------|--------|------------------------------------------------------------------------------------|------------------|----------|-----|------|---|---|--------|---|--------------------------------|-----------|-----------|-----------|-----------|-----------|---------|--------|-------|-------|-----|-----|----|-----|---|---|---|
| Q5V569_HALMA     | 1      | Hypothetical protein                                                               | <i>rrmAC0277</i> | rmAC0277 | 206 | 9.2  | 1 | 5 | 1      | R | DAMLPWEILLLAASPVVGR            | L         | 3         | 2050.1285 | 2050.1294 | 0.000831  | 0       | 0.41   | 5.309 | 0.466 | 0   | 1   | 37 | 72  | 2 | 0 | 1 |
| Q5V569_HALMA     | 1      | Hypothetical protein                                                               | <i>rrmAC0277</i> | rmAC0277 | 206 | 9.2  | 1 | 5 | 1      | R | DAMLPWEILLLAASPVVGR            | L         | 3         | 2050.1285 | 2050.1314 | 0.002845  | 0       | 1.39   | 4.444 | 0.384 | 0   | 1   | 32 | 72  | 2 | 0 | 1 |
| Q5V569_HALMA     | 1      | Hypothetical protein                                                               | <i>rrmAC0277</i> | rmAC0277 | 206 | 9.2  | 1 | 5 | 1      | R | DAMLPWEILLLAASPVVGR            | L         | 2         | 2050.1285 | 2051.1254 | 0.996924  | -1.0034 | -3.13  | 3.492 | 0.476 | 0   | 1   | 17 | 36  | 2 | 0 | 1 |
| Q5V569_HALMA     | 1      | Hypothetical protein                                                               | <i>rrmAC0277</i> | rmAC0277 | 206 | 9.2  | 1 | 5 | 1      | R | DAMLPWEILLLAASPVVGR            | L         | 3         | 2050.1285 | 2050.1215 | -0.007042 | 0       | -3.43  | 4.2   | 0.405 | 0   | 1   | 34 | 72  | 2 | 0 | 1 |
| Q5V5C4_HALMA     | 1      | Hypothetical protein                                                               | <i>rmAC0219</i>  | rmAC0219 | 364 | 19.8 | 5 | 5 | 0.9956 | R | MEVTEEGTIR                     | L         | 2         | 1163.5492 | 1163.5454 | -0.003776 | 0       | -3.25  | 2.161 | 0.195 | 0.4 | 7   | 13 | 18  | 2 | 0 | 1 |
| Q5V5C4_HALMA     | 1      | Hypothetical protein                                                               | <i>rmAC0219</i>  | rmAC0219 | 364 | 19.8 | 5 | 5 | 1      | R | IAEAGPEATPSADGGTATTGR          | D         | 2         | 1928.9075 | 1928.9041 | -0.003375 | 0       | -1.75  | 4.216 | 0.62  | 0   | 1   | 23 | 40  | 2 | 0 | 1 |
| Q5V5C4_HALMA     | 1      | Hypothetical protein                                                               | <i>rmAC0219</i>  | rmAC0219 | 364 | 19.8 | 5 | 5 | 1      | R | IAEAGPEATPSADGGTATTGR          | D         | 2         | 1928.9075 | 1928.9081 | 0.000531  | 0       | 0.28   | 2.925 | 0.46  | 0   | 1   | 20 | 40  | 2 | 0 | 1 |
| Q5V5C4_HALMA     | 1      | Hypothetical protein                                                               | <i>rmAC0219</i>  | rmAC0219 | 364 | 19.8 | 5 | 5 | 0.9234 | M | TSLTDDVYEGEVGR                 | V         | 2         | 1424.6783 | 1424.6815 | 0.003168  | 0       | 2.22   | 2.451 | 0.212 | 0.5 | 1   | 17 | 24  | 2 | 0 | 1 |
| Q5V5X8_HALMA     | 1      | Hypothetical protein                                                               | <i>pNG7384</i>   | pNG7384  | 241 | 17   | 3 | 5 | 1      | R | RLESEVIDTTSK                   | A         | 2         | 1376.7147 | 1376.7134 | -0.001371 | 0       | -1.00  | 3.236 | 0.328 | 0   | 1   | 18 | 22  | 2 | 0 | 1 |
| Q5V5X8_HALMA     | 1      | Hypothetical protein                                                               | <i>pNG7384</i>   | pNG7384  | 241 | 17   | 3 | 5 | 0.9825 | K | NNDSAPGTGSVSDPDTVVTR           | V         | 2         | 2074.9403 | 2074.9454 | 0.005124  | 0       | 2.47   | 1.558 | 0.247 | 0.2 | 1   | 16 | 40  | 2 | 0 | 1 |
| Q5V5X8_HALMA     | 1      | Hypothetical protein                                                               | <i>pNG7384</i>   | pNG7384  | 241 | 17   | 3 | 5 | 1      | R | RLESEVIDTTSK                   | A         | 2         | 1376.7147 | 1376.712  | -0.002714 | 0       | -1.97  | 3.497 | 0.408 | 0   | 1   | 17 | 22  | 2 | 0 | 1 |
| Q5V5Y7_HALMA     | 1      | Glycine betaine transporter                                                        | <i>betL2</i>     | pNG7375  | 586 | 6    | 2 | 5 | 1      | R | SIFWPLLGER                     | I         | 2         | 1216.6604 | 1216.6598 | -0.00066  | 0       | -0.54  | 2.574 | 0.351 | 0   | 1   | 16 | 18  | 2 | 0 | 1 |
| Q5V5Y7_HALMA     | 1      | Glycine betaine transporter                                                        | <i>betL2</i>     | pNG7375  | 586 | 6    | 2 | 5 | 1      | R | ADSDDQQTGGMSDGLQVELFHPESDR     | E         | 3         | 2705.1511 | 2705.1504 | -0.000773 | 0       | -0.29  | 5.658 | 0.522 | 0   | 1   | 36 | 96  | 2 | 0 | 1 |
| Q5V5Y7_HALMA     | 1      | Glycine betaine transporter                                                        | <i>betL2</i>     | pNG7375  | 586 | 6    | 2 | 5 | 1      | R | SIFWPLLGER                     | I         | 2         | 1216.6604 | 1216.6606 | 0.000194  | 0       | 0.16   | 2.606 | 0.346 | 0   | 1   | 16 | 18  | 2 | 0 | 1 |
| Q5V5Y7_HALMA     | 1      | Glycine betaine transporter                                                        | <i>betL2</i>     | pNG7375  | 586 | 6    | 2 | 5 | 1      | R | SIFWPLLGER                     | I         | 2         | 1216.6604 | 1216.6594 | -0.001026 | 0       | -0.84  | 2.963 | 0.377 | 0   | 1   | 17 | 18  | 2 | 0 | 1 |
| Q5V5Y7_HALMA     | 1      | Glycine betaine transporter                                                        | <i>betL2</i>     | pNG7375  | 586 | 6    | 2 | 5 | 1      | R | SIFWPLLGER                     | I         | 2         | 1216.6604 | 1216.6603 | -0.000172 | 0       | -0.14  | 3.13  | 0.395 | 0   | 1   | 16 | 18  | 2 | 0 | 1 |
| Q5V5Z8_HALMA     | 1      | Probable aminomethyltransferase (EC 2.1.2.10)                                      | <i>gcvT5</i>     | pNG7361  | 458 | 13.3 | 3 | 5 | 0.9996 | R | VWDFPVMSVKDHGGR                | Q         | 4         | 1710.8148 | 1710.8149 | 0.000065  | 0       | 0.04   | 2.082 | 0.189 | 1.1 | 2   | 28 | 84  | 2 | 1 | 1 |
| Q5V5Z8_HALMA     | 1      | Probable aminomethyltransferase (EC 2.1.2.10)                                      | <i>gcvT5</i>     | pNG7361  | 458 | 13.3 | 3 | 5 | 1      | R | GLIEPEDGGVMKEYDALNTVTLVWDVAVER | Q         | 3         | 3319.6282 | 3319.6382 | 0.000981  | 0       | 3.01   | 4.119 | 0.317 | 0   | 3   | 25 | 116 | 2 | 1 | 1 |
| Q5V5Z8_HALMA     | 1      | Probable aminomethyltransferase (EC 2.1.2.10)                                      | <i>gcvT5</i>     | pNG7361  | 458 | 13.3 | 3 | 5 | 0.9996 | R | VKGPDAAELTNYVVTR               | D         | 3         | 1731.9155 | 1731.9126 | -0.002966 | 0       | -1.71  | 3.853 | 0.185 | 0   | 1   | 28 | 60  | 2 | 1 | 1 |
| Q5V5Z8_HALMA     | 1      | Probable aminomethyltransferase (EC 2.1.2.10)                                      | <i>gcvT5</i>     | pNG7361  | 458 | 13.3 | 3 | 5 | 0.9993 | R | VKGPDAAELTNYVVTR               | D         | 3         | 1731.9155 | 1731.9107 | -0.004797 | 0       | -2.77  | 3.729 | 0.171 | 0   | 1   | 25 | 60  | 2 | 1 | 1 |
| Q5V5Z8_HALMA     | 1      | Probable aminomethyltransferase (EC 2.1.2.10)                                      | <i>gcvT5</i>     | pNG7361  | 458 | 13.3 | 3 | 5 | 0.9994 | R | VWDFPVMSVKDHGGR                | Q         | 4         | 1710.8148 | 1710.8148 | -0.000057 | 0       | -0.03  | 2.237 | 0.147 | 0.9 | 1   | 31 | 84  | 2 | 1 | 1 |
| Q5V667_HALMA     | 1      | Putative phosphoesterase                                                           | <i>pNG7288</i>   | pNG7288  | 448 | 16.5 | 3 | 5 | 1      | K | FDVLEATYPSLFEQLQK              | T         | 2         | 2027.0251 | 2027.0304 | 0.005245  | 0       | 2.59   | 4.349 | 0.47  | 0   | 1   | 22 | 32  | 2 | 0 | 1 |
| Q5V667_HALMA     | 1      | Putative phosphoesterase                                                           | <i>pNG7288</i>   | pNG7288  | 448 | 16.5 | 3 | 5 | 0.9984 | K | FDVLEATYPSLFEQLQK              | L         | 3         | 2027.0251 | 2027.0182 | -0.006953 | 0       | -3.43  | 3.399 | 0.147 | 0.3 | 4   | 23 | 64  | 2 | 0 | 1 |
| Q5V667_HALMA     | 1      | Putative phosphoesterase                                                           | <i>pNG7288</i>   | pNG7288  | 448 | 16.5 | 3 | 5 | 1      | R | ITAEAGQVIVDYEEVQKPSPEELTLTER   | T         | 3         | 3327.6722 | 3327.6776 | 0.00541   | 0       | 1.63   | 5.299 | 0.48  | 0   | 1   | 33 | 116 | 2 | 0 | 1 |
| Q5V667_HALMA     | 1      | Putative phosphoesterase                                                           | <i>pNG7288</i>   | pNG7288  | 448 | 16.5 | 3 | 5 | 1      | R | ITAEAGQVIVDYEEVQKPSPEELTLTER   | L         | 3         | 3327.6722 | 3327.6703 | -0.001914 | 0       | -0.58  | 6.962 | 0.529 | 0   | 1   | 43 | 116 | 2 | 0 | 1 |
| Q5V667_HALMA     | 1      | Putative phosphoesterase                                                           | <i>pNG7288</i>   | pNG7288  | 448 | 16.5 | 3 | 5 | 0.9976 | F | K                              | 3069.4315 | 3070.4182 | 0.986647  | -1.0034   | -5.44     | 3.435   | 0.152  | 0.4   | 3     | 25  | 104 | 2  | 0   | 1 |   |   |
| RL32_HALMAReview | 1      | 50S ribosomal protein L32e (H15)                                                   | <i>rlp32e</i>    | rmAC1595 | 241 | 12.9 | 3 | 5 | 0.9341 | D | VSGIGNALAAAR                   | I         | 2         | 1027.5774 | 1027.8454 | 0.268024  | 0       | 260.83 | 2.556 | 0.184 | 1.8 | 1   | 16 | 20  | 1 | 0 | 1 |
| RL32_HALMAReview | 1      | 50S ribosomal protein L32e (H15)                                                   | <i>rlp32e</i>    | rmAC1595 | 241 | 12.9 | 3 | 5 | 0.9732 | R | EAGFESVEDVR                    | G         | 2         | 1236.5622 | 1236.5611 | -0.001093 | 0       | -0.88  | 2.135 | 0.141 | 1.3 | 19  | 12 | 20  | 2 | 0 | 1 |
| RL32_HALMAReview | 1      | 50S ribosomal protein L32e (H15)                                                   | <i>rlp32e</i>    | rmAC1595 | 241 | 12.9 | 3 | 5 | 1      | R | EAGFESVEDVRGADQSAADVSIGNALAAAR | I         | 4         | 3074.4905 | 3074.4934 | 0.002831  | 0       | 0.92   | 3.677 | 0.293 | 0   | 1   | 40 | 180 | 2 | 1 | 1 |
| RL32_HALMAReview | 1      | 50S ribosomal protein L32e (H15)                                                   | <i>rlp32e</i>    | rmAC1595 | 241 | 12.9 | 3 | 5 | 1      | R | EAGFESVEDVRGADQSAADVSIGNALAAAR | I         | 3         | 3074.4905 | 3075.4882 | 0.997647  | -1.0034 | -1.85  | 4.397 | 0.373 | 0   | 1   | 26 | 120 | 2 | 1 | 1 |
| RS15_HALMAReview | 1      | 30S ribosomal protein S15P/S13e (HmaS15) (HS11)                                    | <i>rps15p</i>    | rmAC1426 | 156 | 10.3 | 1 | 5 | 0.9999 | R | LRDHMDENPGDYQNKR               | A         | 4         | 1986.8966 | 1986.8906 | -0.006052 | 0       | -3.05  | 4.841 | 0.212 | 0.1 | 1   | 40 | 90  | 2 | 1 | 1 |
| RS15_HALMAReview | 1      | 30S ribosomal protein S15P/S13e (HmaS15) (HS11)                                    | <i>rps15p</i>    | rmAC1426 | 156 | 10.3 | 1 | 5 | 1      | R | LRDHMDENPGDYQNKR               | A         | 4         | 1986.8966 | 1986.8887 | -0.007883 | 0       | -3.97  | 3.211 | 0.332 | 0   | 1   | 42 | 90  | 2 | 1 | 1 |
| RS15_HALMAReview | 1      | 30S ribosomal protein S15P/S13e (HmaS15) (HS11)                                    | <i>rps15p</i>    | rmAC1426 | 156 | 10.3 | 1 | 5 | 1      | R | LRDHMDENPGDYQNKR               | A         | 3         | 1986.8966 | 1986.8866 | -0.010067 | 0       | -5.07  | 4.541 | 0.252 | 0   | 1   | 29 | 60  | 2 | 1 | 1 |
| RS15_HALMAReview | 1      | 30S ribosomal protein S15P/S13e (HmaS15) (HS11)                                    | <i>rps15p</i>    | rmAC1426 | 156 | 10.3 | 1 | 5 | 0.9998 | R | LRDHMDENPGDYQNKR               | A         | 4         | 1986.8966 | 1986.8897 | -0.006906 | 0       | -3.48  | 4.029 | 0.176 | 0.1 | 1   | 35 | 90  | 2 | 1 | 1 |
| RS5_HALMAReview  | 1      | 30S ribosomal protein S5P (HmaS5)                                                  | <i>rps5p</i>     | rmAC1592 | 212 | 19.3 | 4 | 5 | 0.9912 | K | LNIDVSR                        | G         | 2         | 928.5342  | 928.5344  | 0.000174  | 0       | 0.19   | 2.146 | 0.159 | 0.2 | 9   | 11 | 14  | 2 | 0 | 1 |
| RS5_HALMAReview  | 1      | 30S ribosomal protein S5P (HmaS5)                                                  | <i>rps5p</i>     | rmAC1592 | 212 | 19.3 | 4 | 5 | 0.9581 | K | AGSVEVLQAPR                    | G         | 2         | 1351.7096 | 1351.7104 | 0.000799  | 0       | 0.59   | 2.411 | 0.078 | 0.3 | 8   | 13 | 24  | 2 | 0 | 1 |
| RS5_HALMAReview  | 1      | 30S ribosomal protein S5P (HmaS5)                                                  | <i>rps5p</i>     | rmAC1592 | 212 | 19.3 | 4 | 5 | 1      | K | AGSVEVLNIDVSR                  | G         | 3         | 1539.8984 | 1541.8882 | 1.989747  | -2.0067 | -11.01 | 3.728 | 0.295 | 0   | 1   | 29 | 52  | 2 | 1 | 1 |
| RS5_HALMAReview  | 1      | 30S ribosomal protein S5P (HmaS5)                                                  | <i>rps5p</i>     | rmAC1592 | 212 | 19.3 | 4 | 5 | 1      | R | KVLELAGIEDIWTR                 | S         | 3         | 1641.909  | 1642.8982 | 0.989147  | -1.0034 | -8.65  | 3.538 | 0.308 | 0   | 1   | 27 | 52  | 2 | 0 | 1 |
| RS5_HALMAReview  | 1      | 30S ribosomal protein S5P (HmaS5)                                                  | <i>rps5p</i>     | rmAC1592 | 212 | 19.3 | 4 | 5 | 1      | R | KVLELAGIEDIWTR                 | S         | 3         | 1641.909  | 1641.9102 | 0.001154  | 0       | 0.70   | 4.072 | 0.246 | 0   | 1   | 29 | 52  | 2 | 0 | 1 |
| RL31_HALMAReview | 0.9996 | 50S ribosomal protein L31e (L34) (H130)                                            | <i>rlp31e</i>    | rmAC3113 | 92  | 23.9 | 2 | 5 | 1      | K | HFSVDEDAVR                     | L         | 2         | 1173.5414 | 1173.5395 | -0.001899 | 0       | -1.62  | 2.867 | 0.434 | 0   | 1   | 14 | 18  | 2 | 0 | 1 |
| RL31_HALMAReview | 0.9996 | 50S ribosomal protein L31e (L34) (H130)                                            | <i>rlp31e</i>    | rmAC3113 | 92  | 23.9 | 2 | 5 | 1      | K | HFSVDEDAVR                     | L         | 2         | 1173.5414 | 1173.5394 | -0.002021 | 0       | -1.72  | 2.728 | 0.382 | 0   | 1   | 14 | 18  | 2 | 0 | 1 |
| RL31_HALMAReview | 0.9996 | 50S ribosomal protein L31e (L34) (H130)                                            | <i>rlp31e</i>    | rmAC3113 | 92  | 23.9 | 2 | 5 | 1      | K | HFSVDEDAVR                     | L         | 2         | 1173.5414 | 1173.5387 | -0.002754 | 0       | -2.35  | 2.848 | 0.457 | 0   | 1   | 14 | 18  | 2 | 0 | 1 |
| RL31_HALMAReview | 0.9996 | 50S ribosomal protein L31e (L34) (H130)                                            | <i>rlp31e</i>    | rmAC3113 | 92  | 23.9 | 2 | 5 | 1      | K | HFSVDEDAVR                     | L         | 2         | 1173.5414 | 1173.5392 | -0.002266 | 0       | -1.93  | 2.876 | 0.459 | 0   | 1   | 14 | 18  | 2 | 0 | 1 |
| RL31_HALMAReview | 0.9996 | 50S ribosomal protein L31e (L34) (H130)                                            | <i>rlp31e</i>    | rmAC3113 | 92  | 23.9 | 2 | 5 | 0.984  | K | HFSVDEDAVRLDPSINEAAWAR         | G         | 4         | 2497.1986 | 2497.1965 | -0.002144 | 0       | -0.86  | 3.073 | 0.072 | 0.8 | 8   | 30 | 126 | 2 | 1 | 1 |
| Q5V2P3_HALMA     | 0.9995 | Putative 2-ketoglutarate ferredoxin oxidoreductase (Beta) (EC 1.2.7.3)(EC 1.2.7.1) | <i>korB</i>      | rmAC1268 | 312 | 15.7 | 2 | 5 | 1      | K | SPIRPLSQQLNAGATYIAR            | T         | 3         | 2055.1225 | 2055.1237 | 0.001216  | 0       | 0.59   | 4.399 | 0.33  | 0   | 1   | 39 | 72  | 2 | 0 | 1 |
| Q5V2P3_HALMA     | 0.9995 | Putative 2-ketoglutarate ferredoxin oxidoreductase (Beta) (EC 1.2.7.3)(EC 1.2.7.1) | <i>korB</i>      | rmAC1268 | 312 | 15.7 | 2 | 5 | 0.9799 | K | LANPNLEVIAAGGDGGYGIGGNHTHTAR   | E         | 4         | 2959.4536 | 2960.4509 | 0.997271  | -1.0034 | -2.05  | 3.493 | 0.168 | 0.3 | 44  | 33 | 174 | 2 | 0 | 1 |
| Q5V2P3_HALMA     | 0.9995 | Putative 2-ketoglutarate ferredoxin oxidoreductase (Beta) (EC 1.2.7.3)(EC 1.2.7.1) | <i>korB</i>      | rmAC1268 | 312 | 15.7 | 2 | 5 | 1      | K | SPIRPLSQQLNAGATYIAR            | T         | 3         | 2055.1225 | 2055.1221 | -0.000432 | 0       | -0.21  | 4.104 | 0.381 | 0   | 1   | 35 | 72  | 2 | 0 | 1 |
| Q5V2P3_HALMA     | 0.9995 | Putative 2-ketoglutarate ferredoxin oxidoreductase (Beta) (EC 1.2.7.3)(EC 1.2.7.1) | <i>korB</i>      | rmAC1268 | 312 | 15.7 | 2 | 5 | 1      | K | SPIRPLSQQLNAGATYIAR            | T         | 3         | 2055.1225 | 2055.117  | -0.005559 | 0       | -2.70  | 3.768 | 0.276 | 0   | 1   | 34 | 72  | 2 | 0 | 1 |
| Q5V2P3_HALMA     | 0.9995 | Putative 2-ketoglutarate ferredoxin oxidoreductase (Beta) (EC 1.2.7.3)(EC 1.2.7.1) | <i>korB</i>      | rmAC1268 | 312 | 15.7 | 2 | 5 | 0.9879 | K | SPIRPLSQQLNAGATYIAR            | T         | 3         | 2055.1225 | 2055.1245 | 0.001948  | 0       | 0.95</ |       |       |     |     |    |     |   |   |   |



|                   |        |                                                        |                 |          |     |      |   |   |        |   |                                 |   |   |           |           |           |         |        |       |       |     |    |    |     |   |   |   |
|-------------------|--------|--------------------------------------------------------|-----------------|----------|-----|------|---|---|--------|---|---------------------------------|---|---|-----------|-----------|-----------|---------|--------|-------|-------|-----|----|----|-----|---|---|---|
| Q5V6Q3_HALMA      | 1      | MCP domain signal transducer                           | <i>htr8</i>     | pNG7084  | 637 | 8.5  | 3 | 4 | 0.9669 | R | ASELVEKEIEAVER                  | S | 3 | 1600.8308 | 1600.8382 | 0.007347  | 0       | 4.59   | 3.185 | 0.055 | 0.8 | 1  | 28 | 52  | 2 | 1 | 1 |
| Q5V6Q3_HALMA      | 1      | MCP domain signal transducer                           | <i>htr8</i>     | pNG7084  | 637 | 8.5  | 3 | 4 | 0.9996 | R | TRIEINQAQTGVVSQVER              | A | 2 | 2128.1236 | 2128.1175 | -0.006096 | 0       | -2.86  | 2.958 | 0.305 | 0   | 1  | 17 | 36  | 2 | 1 | 1 |
| Q5V7X2_HALMA      | 1      | Hypothetical protein                                   | <i>pNG4050</i>  | pNG4050  | 265 | 8.3  | 2 | 4 | 0.9993 | R | TTVAGLIAAIVLGIER                | D | 2 | 1482.877  | 1482.8788 | 0.001734  | 0       | 1.17   | 2.795 | 0.195 | 0   | 1  | 19 | 28  | 2 | 0 | 1 |
| Q5V7X2_HALMA      | 1      | Hypothetical protein                                   | <i>pNG4050</i>  | pNG4050  | 265 | 8.3  | 2 | 4 | 1      | R | TTVAGLIAAIVLGIER                | D | 2 | 1482.877  | 1482.8772 | 0.000147  | 0       | 0.10   | 3.268 | 0.445 | 0   | 1  | 20 | 28  | 2 | 0 | 1 |
| Q5V7X2_HALMA      | 1      | Hypothetical protein                                   | <i>pNG4050</i>  | pNG4050  | 265 | 8.3  | 2 | 4 | 1      | R | TTVAGLIAAIVLGIER                | D | 3 | 1482.877  | 1482.8663 | -0.0107   | 0       | -7.22  | 4.053 | 0.356 | 0   | 1  | 28 | 56  | 2 | 0 | 1 |
| SODM_HALMARReview | 1      | Superoxide dismutase [Mn] (EC 1.15.1.1)                | <i>sod</i>      | rmAC0831 | 203 | 13.8 | 3 | 4 | 0.9934 | R | GDFFDAFFFEVDWDKAAEEYEKSVSHFE    | - | 4 | 3308.4826 | 3308.4833 | 0.000722  | 0       | 0.22   | 1.963 | 0.051 | 3.1 | 1  | 38 | 162 | 2 | 2 | 1 |
| SODM_HALMARReview | 1      | Superoxide dismutase [Mn] (EC 1.15.1.1)                | <i>sod</i>      | rmAC0831 | 203 | 13.8 | 3 | 4 | 1      | R | GDFFDAFFFEVDWDK                 | A | 2 | 1801.8199 | 1801.8142 | -0.005741 | 0       | -3.19  | 4.144 | 0.52  | 0   | 1  | 21 | 28  | 2 | 0 | 1 |
| SODM_HALMARReview | 1      | Superoxide dismutase [Mn] (EC 1.15.1.1)                | <i>sod</i>      | rmAC0831 | 203 | 13.8 | 3 | 4 | 0.9998 | R | GDFFDAFFFEVDWDKAAEEYEK          | S | 3 | 2622.1802 | 2622.1638 | -0.016384 | 0       | -6.25  | 3.172 | 0.28  | 0   | 1  | 30 | 84  | 2 | 1 | 1 |
| SODM_HALMARReview | 1      | Superoxide dismutase [Mn] (EC 1.15.1.1)                | <i>sod</i>      | rmAC0831 | 203 | 13.8 | 3 | 4 | 0.9998 | R | GDFFDAFFFEVDWDKAAEEYEK          | S | 3 | 2622.1802 | 2622.1798 | -0.000454 | 0       | -0.17  | 3.031 | 0.279 | 0.1 | 1  | 27 | 84  | 2 | 1 | 1 |
| Q5UXS5_HALMA      | 0.9999 | Sodium/solute symporter                                | <i>ssf</i>      | rmAC3226 | 532 | 3.2  | 2 | 4 | 0.9987 | K | YTAPDFVGDRFNSPTAR               | A | 2 | 1912.9068 | 1912.9065 | -0.000356 | 0       | -0.19  | 2.86  | 0.255 | 0   | 1  | 15 | 32  | 2 | 1 | 1 |
| Q5UXS5_HALMA      | 0.9999 | Sodium/solute symporter                                | <i>ssf</i>      | rmAC3226 | 532 | 3.2  | 2 | 4 | 1      | K | YTAPDFVGDR                      | F | 2 | 1139.5247 | 1139.5235 | -0.001191 | 0       | -1.05  | 2.422 | 0.484 | 0   | 1  | 14 | 18  | 2 | 0 | 1 |
| Q5UXS5_HALMA      | 0.9999 | Sodium/solute symporter                                | <i>ssf</i>      | rmAC3226 | 532 | 3.2  | 2 | 4 | 0.9966 | K | YTAPDFVGDR                      | - | 2 | 1139.5247 | 1139.5254 | 0.000724  | 0       | 0.64   | 2.116 | 0.181 | 0   | 1  | 14 | 18  | 2 | 0 | 1 |
| Q5UZW8_HALMA      | 0.9999 | Hypothetical protein                                   | <i>rmAC2368</i> | rmAC2368 | 344 | 5.5  | 1 | 4 | 1      | R | AHEDPDETCLRPEQTEFDP             | F | 2 | 2253.9662 | 2254.9657 | 0.999448  | -1.0034 | -1.73  | 3.251 | 0.399 | 0   | 1  | 17 | 36  | 2 | 0 | 1 |
| Q5UZW8_HALMA      | 0.9999 | Hypothetical protein                                   | <i>rmAC2368</i> | rmAC2368 | 344 | 5.5  | 1 | 4 | 1      | R | AHEDPDETCLRPEQTEFDP             | - | 2 | 2253.9662 | 2254.9728 | 1.006528  | -1.0034 | 1.41   | 2.97  | 0.374 | 0   | 1  | 20 | 36  | 2 | 0 | 1 |
| Q5UZW8_HALMA      | 0.9999 | Hypothetical protein                                   | <i>rmAC2368</i> | rmAC2368 | 344 | 5.5  | 1 | 4 | 0.9975 | R | AHEDPDETCLRPEQTEFDP             | - | 3 | 2253.9662 | 2253.9605 | -0.005692 | 0       | -2.53  | 2.589 | 0.222 | 0.1 | 12 | 19 | 72  | 2 | 0 | 1 |
| Q5V1N5_HALMA      | 0.9999 | Hypothetical protein                                   | <i>rmAC1654</i> | rmAC1654 | 190 | 21.1 | 2 | 4 | 0.9953 | K | DGTPLTGTGLAAAESIERQYELNGRR      | V | 3 | 2717.3732 | 2717.3884 | 0.015164  | 0       | 5.58   | 2.24  | 0.261 | 0.3 | 2  | 25 | 96  | 2 | 1 | 1 |
| Q5V1N5_HALMA      | 0.9999 | Hypothetical protein                                   | <i>rmAC1654</i> | rmAC1654 | 190 | 21.1 | 2 | 4 | 1      | R | EITTESPGQLNIALR                 | N | 2 | 1652.9097 | 1652.9054 | -0.004276 | 0       | -2.59  | 3.237 | 0.37  | 0   | 1  | 21 | 28  | 2 | 0 | 1 |
| Q5V1N5_HALMA      | 0.9999 | Hypothetical protein                                   | <i>rmAC1654</i> | rmAC1654 | 190 | 21.1 | 2 | 4 | 1      | R | EITTESPGQLNIALR                 | N | 2 | 1652.9097 | 1652.9054 | -0.004276 | 0       | -2.59  | 3.21  | 0.329 | 0   | 1  | 20 | 28  | 2 | 0 | 1 |
| Q5V1N5_HALMA      | 0.9999 | Hypothetical protein                                   | <i>rmAC1654</i> | rmAC1654 | 190 | 21.1 | 2 | 4 | 1      | R | EITTESPGQLNIALR                 | N | 2 | 1652.9097 | 1652.9054 | -0.004276 | 0       | -2.59  | 3.446 | 0.384 | 0   | 1  | 20 | 28  | 2 | 0 | 1 |
| Q5UXD3_HALMA      | 0.9996 | Hypothetical protein                                   | <i>rmAC3388</i> | rmAC3388 | 202 | 15.3 | 2 | 4 | 0.9771 | K | HTPEPQPVDLFDGHDPVLYFADEGHGPVVR  | A | 5 | 3436.6476 | 3436.6494 | 0.001785  | 0       | 0.52   | 2.772 | 0.155 | 1.3 | 32 | 45 | 240 | 2 | 0 | 1 |
| Q5UXD3_HALMA      | 0.9996 | Hypothetical protein                                   | <i>rmAC3388</i> | rmAC3388 | 202 | 15.3 | 2 | 4 | 1      | K | HTPEPQPVDLFDGHDPVLYFADEGHGPVVR  | A | 4 | 3436.6476 | 3436.6408 | -0.006808 | 0       | -1.98  | 4.948 | 0.371 | 0   | 1  | 44 | 180 | 2 | 0 | 1 |
| Q5UXD3_HALMA      | 0.9996 | Hypothetical protein                                   | <i>rmAC3388</i> | rmAC3388 | 202 | 15.3 | 2 | 4 | 1      | K | HTPEPQPVDLFDGHDPVLYFADEGHGPVVR  | A | 4 | 3436.6476 | 3438.6509 | 2.003271  | -2.0067 | -1.00  | 4.678 | 0.479 | 0   | 1  | 44 | 180 | 2 | 0 | 1 |
| Q5UXD3_HALMA      | 0.9996 | Hypothetical protein                                   | <i>rmAC3388</i> | rmAC3388 | 202 | 15.3 | 2 | 4 | 0.9808 | K | HTPEPQPVDLFDGHDPVLYFADEGHGPVVR  | A | 5 | 3436.6476 | 3437.6636 | 1.015994  | -1.0034 | 3.68   | 3.098 | 0.156 | 1.2 | 10 | 43 | 240 | 2 | 0 | 1 |
| Q5V0M5_HALMA      | 0.9994 | Hypothetical protein                                   | <i>rmAC2074</i> | rmAC2074 | 536 | 7.5  | 2 | 4 | 0.9971 | K | SAGEPDAADGLLTTVPYEDAAAGLLAAEVGR | V | 3 | 2999.4724 | 2999.4699 | -0.002554 | 0       | -0.85  | 3.045 | 0.187 | 0.6 | 8  | 23 | 120 | 2 | 0 | 1 |
| Q5V0M5_HALMA      | 0.9994 | Hypothetical protein                                   | <i>rmAC2074</i> | rmAC2074 | 536 | 7.5  | 2 | 4 | 0.9751 | R | DLFSLPFDK                       | T | 2 | 1080.5491 | 1080.5454 | -0.003676 | 0       | -3.40  | 1.909 | 0.185 | 0.2 | 30 | 10 | 16  | 2 | 0 | 1 |
| Q5V0M5_HALMA      | 0.9994 | Hypothetical protein                                   | <i>rmAC2074</i> | rmAC2074 | 536 | 7.5  | 2 | 4 | 0.9999 | K | SAGEPDAADGLLTTVPYEDAAAGLLAAEVGR | V | 3 | 2999.4724 | 2999.4816 | 0.009165  | 0       | 3.06   | 3.733 | 0.243 | 0.1 | 1  | 30 | 120 | 2 | 0 | 1 |
| Q5UZM9_HALMA      | 0.9991 | Branched chain amino acid transporter permease protein | <i>livH-6</i>   | rmAC2468 | 305 | 11.8 | 2 | 4 | 1      | R | SGPIPVLLDITLNVAVTQR             | D | 3 | 1892.0731 | 1893.0648 | 0.991656  | -1.0034 | -6.18  | 4.618 | 0.413 | 0   | 1  | 30 | 68  | 2 | 0 | 1 |
| Q5UZM9_HALMA      | 0.9991 | Branched chain amino acid transporter permease protein | <i>livH-6</i>   | rmAC2468 | 305 | 11.8 | 2 | 4 | 0.9571 | R | AVLQATFGTDFLQYDISR              | S | 3 | 2044.0265 | 2045.9182 | 1.891647  | -2.0067 | -56.29 | 2.934 | 0.099 | 0.1 | 9  | 21 | 68  | 2 | 0 | 1 |
| Q5UZM9_HALMA      | 0.9991 | Branched chain amino acid transporter permease protein | <i>livH-6</i>   | rmAC2468 | 305 | 11.8 | 2 | 4 | 1      | R | SGPIPVLLDITLNVAVTQR             | D | 3 | 1892.0731 | 1893.0736 | 1.000445  | -1.0034 | -1.54  | 5.367 | 0.412 | 0   | 1  | 31 | 68  | 2 | 0 | 1 |
| Q5UZM9_HALMA      | 0.9991 | Branched chain amino acid transporter permease protein | <i>livH-6</i>   | rmAC2468 | 305 | 11.8 | 2 | 4 | 1      | R | SGPIPVLLDITLNVAVTQR             | D | 3 | 1892.0731 | 1893.0682 | 0.995047  | -1.0034 | -4.39  | 4.835 | 0.267 | 0   | 1  | 32 | 68  | 2 | 0 | 1 |
| Q5V5Y9_HALMA      | 0.9977 | Universal stress protein                               | <i>usp25</i>    | pNG7373  | 147 | 27.9 | 2 | 4 | 1      | K | TGAPSEIEVEFAEGEGMDAIVLGSAFR     | G | 3 | 2781.3167 | 2781.3114 | -0.005301 | 0       | -1.91  | 3.675 | 0.447 | 0   | 1  | 27 | 104 | 2 | 0 | 1 |
| Q5V5Y9_HALMA      | 0.9977 | Universal stress protein                               | <i>usp25</i>    | pNG7373  | 147 | 27.9 | 2 | 4 | 1      | K | TGAPSEIEVEFAEGEGMDAIVLGSAFR     | G | 3 | 2781.3167 | 2782.3282 | 1.011447  | -1.0034 | 2.91   | 3.921 | 0.385 | 0   | 3  | 25 | 104 | 2 | 0 | 1 |
| Q5V5Y9_HALMA      | 0.9977 | Universal stress protein                               | <i>usp25</i>    | pNG7373  | 147 | 27.9 | 2 | 4 | 0.9988 | G | TGAPSEIEVEFAEGEGMDAIVLGSAFR     | G | 3 | 2781.3167 | 2782.3282 | 1.011447  | -1.0034 | 2.91   | 2.699 | 0.256 | 0.6 | 3  | 24 | 104 | 2 | 0 | 1 |
| Q5UX88_HALMA      | 0.9951 | Potassium channel-like                                 | <i>pch2</i>     | rmAC3436 | 404 | 14.9 | 2 | 4 | 1      | R | AGADTVISPAVLGGHLIVQSALGR        | E | 3 | 2301.2805 | 2301.2801 | -0.000412 | 0       | -0.18  | 3.076 | 0.385 | 0   | 1  | 36 | 92  | 2 | 0 | 1 |
| Q5UX88_HALMA      | 0.9951 | Potassium channel-like                                 | <i>pch2</i>     | rmAC3436 | 404 | 14.9 | 2 | 4 | 1      | R | AGADTVISPAVLGGHLIVQSALGR        | E | 3 | 2301.2805 | 2301.2799 | -0.000595 | 0       | -0.26  | 3.284 | 0.398 | 0   | 1  | 38 | 92  | 2 | 0 | 1 |
| Q5UX88_HALMA      | 0.9951 | Potassium channel-like                                 | <i>pch2</i>     | rmAC3436 | 404 | 14.9 | 2 | 4 | 1      | R | AGADTVISPAVLGGHLIVQSALGR        | E | 3 | 2301.2805 | 2301.2748 | -0.005722 | 0       | -2.49  | 3.199 | 0.418 | 0   | 1  | 33 | 92  | 2 | 0 | 1 |
| Q5UX88_HALMA      | 0.9951 | Potassium channel-like                                 | <i>pch2</i>     | rmAC3436 | 404 | 14.9 | 2 | 4 | 0.9986 | E | AGADTVISPAVLGGHLIVQSALGR        | E | 3 | 2301.2805 | 2301.2788 | -0.001694 | 0       | -0.74  | 2.728 | 0.21  | 0.3 | 2  | 29 | 92  | 2 | 0 | 1 |
| Q5V0L5_HALMA      | 0.9951 | Hypothetical protein                                   | <i>rmAC2085</i> | rmAC2085 | 173 | 15   | 1 | 4 | 0.9992 | R | ISDKQDVIDDKDAVYDGDVVVADITR      | H | 4 | 2861.4658 | 2861.4736 | 0.007756  | 0       | 2.71   | 3.254 | 0.151 | 0.3 | 2  | 40 | 150 | 2 | 2 | 1 |
| Q5V0L5_HALMA      | 0.9951 | Hypothetical protein                                   | <i>rmAC2085</i> | rmAC2085 | 173 | 15   | 1 | 4 | 1      | R | ISDKQDVIDDKDAVYDGDVVVADITR      | H | 4 | 2861.4658 | 2861.4689 | 0.003117  | 0       | 1.09   | 4.054 | 0.365 | 0   | 1  | 43 | 150 | 2 | 2 | 1 |
| Q5V0L5_HALMA      | 0.9951 | Hypothetical protein                                   | <i>rmAC2085</i> | rmAC2085 | 173 | 15   | 1 | 4 | 1      | R | ISDKQDVIDDKDAVYDGDVVVADITR      | H | 4 | 2861.4658 | 2861.4682 | 0.002385  | 0       | 0.83   | 4.081 | 0.39  | 0   | 1  | 39 | 150 | 2 | 2 | 1 |
| Q5V0L5_HALMA      | 0.9951 | Hypothetical protein                                   | <i>rmAC2085</i> | rmAC2085 | 173 | 15   | 1 | 4 | 1      | R | ISDKQDVIDDKDAVYDGDVVVADITR      | H | 4 | 2861.4658 | 2861.4685 | 0.002629  | 0       | 0.92   | 4.027 | 0.356 | 0   | 1  | 47 | 150 | 2 | 2 | 1 |
| Q5UWR4_HALMA      | 0.981  | Putative 2-component system sensor kinase              | <i>ski-1</i>    | rmB0083  | 247 | 6.5  | 2 | 4 | 0.9999 | R | ALLGDPAAVLDWLSSL                | - | 2 | 1639.8821 | 1639.8799 | -0.002267 | 0       | -1.38  | 2.573 | 0.327 | 0   | 1  | 17 | 30  | 2 | 0 | 1 |
| Q5UWR4_HALMA      | 0.981  | Putative 2-component system sensor kinase              | <i>ski-1</i>    | rmB0083  | 247 | 6.5  | 2 | 4 | 1      | R | ALLGDPAAVLDWLSSL                | - | 2 | 1639.8821 | 1639.8818 | -0.000314 | 0       | -0.19  | 3.418 | 0.408 | 0   | 1  | 19 | 30  | 2 | 0 | 1 |
| Q5UWR4_HALMA      | 0.981  | Putative 2-component system sensor kinase              | <i>ski-1</i>    | rmB0083  | 247 | 6.5  | 2 | 4 | 1      | R | ALLGDPAAVLDWLSSL                | - | 2 | 1639.8821 | 1639.8825 | 0.000418  | 0       | 0.25   | 3.081 | 0.394 | 0   | 1  | 16 | 30  | 2 | 0 | 1 |
| Q5UWR4_HALMA      | 0.981  | Putative 2-component system sensor kinase              | <i>ski-1</i>    | rmB0083  | 247 | 6.5  | 2 | 4 | 1      | R | ALLGDPAAVLDWLSSL                | - | 2 | 1639.8821 | 1639.8818 | -0.000314 | 0       | -0.19  | 4.166 | 0.585 | 0   | 1  | 20 | 30  | 2 | 0 | 1 |
| Q5UXI4_HALMA      | 0.981  | Halocyanin-like                                        | <i>hcp3</i>     | rmAC3329 | 219 | 5.5  | 1 | 4 | 1      | K | GAIVVGTDYPTK                    | S | 2 | 1219.6448 | 1219.6456 | 0.00078   | 0       | 0.64   | 3.583 | 0.411 | 0   | 1  | 18 | 22  | 2 | 0 | 1 |
| Q5UXI4_HALMA      | 0.981  | Halocyanin-like                                        | <i>hcp3</i>     | rmAC3329 | 219 | 5.5  | 1 | 4 | 1      | K | GAIVVGTDYPTK                    | S | 2 | 1219.6448 | 1219.6441 | -0.000685 | 0       | -0.56  | 3.371 | 0.446 | 0   | 1  | 18 | 22  | 2 | 0 | 1 |
| Q5UXI4_HALMA      | 0.981  | Halocyanin-like                                        | <i>hcp3</i>     | rmAC3329 | 219 | 5.5  | 1 | 4 | 1      | K | GAIVVGTDYPTK                    | S | 2 | 1219.6448 | 1219.6445 | -0.000319 | 0       | -0.26  | 3.086 | 0.491 | 0   | 1  | 18 | 22  | 2 | 0 | 1 |
| Q5UXI4_HALMA      | 0.981  | Halocyanin-like                                        | <i>hcp3</i>     | rmAC3329 | 219 | 5.5  | 1 | 4 | 1      | K | GAIVVGTDYPTK                    | S | 2 | 1219.6448 | 1219.643  | -0.001784 | 0       | -1.46  | 3.207 | 0.448 | 0   | 1  | 17 | 22  | 2 | 0 | 1 |
| Q5UZS0_HALMA      | 0.981  | Hypothetical protein                                   | <i>rmAC2421</i> | rmAC2    |     |      |   |   |        |   |                                 |   |   |           |           |           |         |        |       |       |     |    |    |     |   |   |   |

|              |   |                                                      |      |          |     |     |   |   |        |   |                                       |   |   |           |           |           |         |        |       |       |     |    |    |     |   |   |   |
|--------------|---|------------------------------------------------------|------|----------|-----|-----|---|---|--------|---|---------------------------------------|---|---|-----------|-----------|-----------|---------|--------|-------|-------|-----|----|----|-----|---|---|---|
| Q5UZE1_HALMA | 1 | Phosphoglucosyltransferase (EC 3.6.3.16)             | pmn  | rmAC2568 | 479 | 9.4 | 3 | 3 | 0.9997 | R | ETSPGFADFLAHR                         | W | 3 | 1656.8875 | 1656.895  | 0.007456  | 0       | 4.50   | 4.328 | 0.436 | 0   | 1  | 31 | 52  | 2 | 0 | 1 |
| Q5UZE1_HALMA | 1 | Phosphoglucosyltransferase (EC 5.4.2.2) (EC 5.4.2.8) | pmn  | rmAC2568 | 479 | 9.4 | 3 | 3 | 0.9724 | R | ETSPGFADFLAHR                         | A | 4 | 1790.9064 | 1790.9036 | -0.00279  | 0       | -1.56  | 2.372 | 0.162 | 0.2 | 1  | 33 | 96  | 2 | 0 | 1 |
| Q5UZE1_HALMA | 1 | Phosphoglucosyltransferase (EC 5.4.2.2) (EC 5.4.2.8) | pmn  | rmAC2568 | 479 | 9.4 | 3 | 3 | 0.9998 | R | ETSPGFADFLAHR                         | V | 2 | 1345.7024 | 1347.6054 | 1.903024  | -2.0067 | -77.04 | 2.973 | 0.296 | 0   | 1  | 20 | 24  | 2 | 0 | 1 |
| Q5UZH3_HALMA | 1 | Anion permease                                       | ynlA | rmAC2527 | 402 | 8.5 | 2 | 3 | 0.9999 | K | PAETEPPIGIESREDIPSASDLFEPGTTAR        | G | 4 | 3611.7591 | 3611.7587 | -0.000388 | 0       | -0.11  | 4.01  | 0.26  | 0.1 | 2  | 40 | 198 | 2 | 1 | 1 |
| Q5UZH3_HALMA | 1 | Anion permease                                       | ynlA | rmAC2527 | 402 | 8.5 | 2 | 3 | 1      | K | PAETEPPIGIESREDIPSASDLFEPGTTAR        | V | 3 | 3100.4473 | 3100.4518 | 0.00448   | 0       | 1.44   | 5.653 | 0.511 | 0   | 1  | 39 | 112 | 1 | 1 | 1 |
| Q5UZH3_HALMA | 1 | Anion permease                                       | ynlA | rmAC2527 | 402 | 8.5 | 2 | 3 | 1      | K | PAETEPPIGIESREDIPSASDLFEPGTTAR        | V | 3 | 3100.4473 | 3101.4682 | 1.020847  | -1.0034 | 5.64   | 5.75  | 0.493 | 0   | 1  | 32 | 112 | 1 | 1 | 1 |
| Q5UZH3_HALMA | 1 | Anion permease                                       | ynlA | rmAC2527 | 402 | 8.5 | 2 | 3 | 1      | R | SVDTPPDDQTETLNR                       | L | 2 | 1690.7646 | 1690.7594 | -0.005251 | 0       | -3.11  | 3.249 | 0.251 | 0   | 1  | 19 | 28  | 2 | 0 | 1 |
| Q5UZH3_HALMA | 1 | Anion permease                                       | ynlA | rmAC2527 | 402 | 8.5 | 2 | 3 | 1      | R | SVDTPPDDQTETLNR                       | L | 2 | 1642.8526 | 1642.8523 | -0.000355 | 0       | -0.22  | 4     | 0.423 | 0   | 1  | 21 | 28  | 2 | 0 | 1 |
| Q5UZH3_HALMA | 1 | Anion permease                                       | ynlA | rmAC2527 | 402 | 8.5 | 2 | 3 | 1      | R | SVDTPPDDQTETLNR                       | G | 2 | 1642.8526 | 1642.8509 | -0.001698 | 0       | -1.03  | 4.047 | 0.448 | 0   | 1  | 20 | 28  | 2 | 0 | 1 |
| Q5UZH3_HALMA | 1 | Anion permease                                       | ynlA | rmAC2527 | 402 | 8.5 | 2 | 3 | 1      | F | VFVPPVPMPTGLSSHWLR                    | F | 3 | 2134.1761 | 2134.1806 | 0.004501  | 0       | 2.11   | 2.438 | 0.312 | 0.3 | 34 | 20 | 72  | 2 | 0 | 1 |
| Q5UZH3_HALMA | 1 | Anion permease                                       | ynlA | rmAC2527 | 402 | 8.5 | 2 | 3 | 1      | W | IVDDLTDRPLMLVPK                       | W | 3 | 1837.0383 | 1837.0385 | 0.000211  | 0       | 0.11   | 3.879 | 0.281 | 0.1 | 1  | 30 | 60  | 2 | 1 | 1 |
| Q5UZH3_HALMA | 1 | Anion permease                                       | ynlA | rmAC2527 | 402 | 8.5 | 2 | 3 | 1      | R | IVDDLTDRPLMLVPK                       | W | 3 | 1837.0383 | 1837.0371 | -0.001254 | 0       | -0.68  | 3.87  | 0.285 | 0   | 1  | 32 | 60  | 2 | 1 | 1 |
| Q5UZH3_HALMA | 1 | Anion permease                                       | ynlA | rmAC2527 | 402 | 8.5 | 2 | 3 | 1      | R | HNDGLHDLGVRFQ                         | - | 3 | 1506.7328 | 1506.7333 | 0.000474  | 0       | 0.31   | 2.862 | 0.4   | 0   | 1  | 25 | 48  | 2 | 1 | 1 |
| Q5UZH3_HALMA | 1 | Anion permease                                       | ynlA | rmAC2527 | 402 | 8.5 | 2 | 3 | 1      | H | ALDGGPLNAAAEIEGLTPLINVAR              | H | 3 | 2487.3697 | 2487.3704 | 0.000659  | 0       | 0.26   | 4.819 | 0.38  | 0   | 1  | 34 | 96  | 2 | 0 | 1 |
| Q5UZH3_HALMA | 1 | Anion permease                                       | ynlA | rmAC2527 | 402 | 8.5 | 2 | 3 | 1      | R | ALDGGPLNAAAEIEGLTPLINVAR              | H | 3 | 2487.3697 | 2487.3794 | 0.009631  | 0       | 3.87   | 3.232 | 0.131 | 0.2 | 2  | 27 | 96  | 2 | 0 | 1 |
| Q5UZH3_HALMA | 1 | Anion permease                                       | ynlA | rmAC2527 | 402 | 8.5 | 2 | 3 | 1      | A | MGSEQLYNVDDAANDNNFK                   | A | 2 | 2143.9116 | 2144.2654 | 0.353824  | 0       | 165.04 | 4.827 | 0.588 | 0   | 1  | 24 | 36  | 2 | 0 | 1 |
| Q5UZH3_HALMA | 1 | Anion permease                                       | ynlA | rmAC2527 | 402 | 8.5 | 2 | 3 | 1      | R | MGSEQLYNVDDAANDNNFK                   | A | 2 | 2143.9116 | 2143.9034 | -0.008208 | 0       | -3.83  | 5.582 | 0.538 | 0   | 1  | 24 | 36  | 2 | 0 | 1 |
| Q5UZH3_HALMA | 1 | Anion permease                                       | ynlA | rmAC2527 | 402 | 8.5 | 2 | 3 | 1      | R | VVVLAETPQTR                           | L | 2 | 1211.6874 | 1211.6855 | -0.001903 | 0       | -1.57  | 2.445 | 0.281 | 0   | 1  | 14 | 20  | 2 | 0 | 1 |
| Q5UZH3_HALMA | 1 | Anion permease                                       | ynlA | rmAC2527 | 402 | 8.5 | 2 | 3 | 1      | R | GFLVETDRDGVTTNKIDEK                   | L | 3 | 2136.0699 | 2136.071  | 0.001081  | 0       | 0.51   | 4.736 | 0.454 | 0   | 1  | 34 | 72  | 2 | 2 | 1 |
| Q5UZH3_HALMA | 1 | Anion permease                                       | ynlA | rmAC2527 | 402 | 8.5 | 2 | 3 | 1      | K | LAEMATQISLGLLAHR                      | L | 3 | 1851.0036 | 1851.0082 | 0.004547  | 0       | 2.46   | 2.986 | 0.34  | 0   | 2  | 25 | 64  | 2 | 0 | 1 |
| Q5UZH3_HALMA | 1 | Anion permease                                       | ynlA | rmAC2527 | 402 | 8.5 | 2 | 3 | 1      | V | TWITNAPISDLAVVWAK                     | V | 2 | 1884.0145 | 1884.0157 | 0.001197  | 0       | 0.64   | 4.246 | 0.479 | 0   | 1  | 25 | 32  | 2 | 0 | 1 |
| Q5UZH3_HALMA | 1 | Anion permease                                       | ynlA | rmAC2527 | 402 | 8.5 | 2 | 3 | 1      | R | RLPDAEGLPQYVAPLPAWLENVGLR             | L | 3 | 2773.4915 | 2773.5018 | 0.010268  | 0       | 3.70   | 5.092 | 0.415 | 0   | 1  | 44 | 96  | 2 | 0 | 1 |
| Q5UZH3_HALMA | 1 | Anion permease                                       | ynlA | rmAC2527 | 402 | 8.5 | 2 | 3 | 1      | M | APDEGVGGRIDAVVAR                      | V | 3 | 1580.827  | 1580.8366 | 0.009606  | 0       | 6.08   | 2.95  | 0.391 | 0   | 1  | 26 | 60  | 2 | 1 | 1 |
| Q5UZH3_HALMA | 1 | Anion permease                                       | ynlA | rmAC2527 | 402 | 8.5 | 2 | 3 | 1      | R | RLPDAEGLPQYVAPLPAWLENVGLR             | L | 3 | 2773.4915 | 2774.4982 | 1.006647  | -1.0034 | 1.19   | 4.44  | 0.341 | 0   | 1  | 31 | 96  | 2 | 0 | 1 |
| Q5UZH3_HALMA | 1 | Anion permease                                       | ynlA | rmAC2527 | 402 | 8.5 | 2 | 3 | 1      | D | REVAGESVTLGIVETDDDDMAVAA              | D | 2 | 2466.1119 | 2467.1102 | 0.998279  | -1.0034 | -2.06  | 4.667 | 0.57  | 0   | 1  | 22 | 46  | 1 | 0 | 1 |
| Q5UZH3_HALMA | 1 | Anion permease                                       | ynlA | rmAC2527 | 402 | 8.5 | 2 | 3 | 1      | D | REVAGESVTLGIVETDDDDMAVAA              | D | 2 | 2450.1119 | 2450.1222 | 0.010242  | 0       | 4.18   | 4.611 | 0.474 | 0   | 1  | 24 | 46  | 1 | 0 | 1 |
| Q5UZH3_HALMA | 1 | Anion permease                                       | ynlA | rmAC2527 | 402 | 8.5 | 2 | 3 | 1      | D | REVAGESVTLGIVETDDDDMAVAA              | D | 2 | 2450.1119 | 2451.1246 | 1.012684  | -1.0034 | 3.81   | 3.49  | 0.38  | 0   | 1  | 16 | 46  | 1 | 0 | 1 |
| Q5UZH3_HALMA | 1 | Anion permease                                       | ynlA | rmAC2527 | 402 | 8.5 | 2 | 3 | 1      | V | ATLHDPALLLLDEPFTGLDEESLLR             | V | 3 | 2777.4487 | 2778.4582 | 1.009447  | -1.0034 | 2.20   | 6.375 | 0.466 | 0   | 1  | 45 | 96  | 2 | 0 | 1 |
| Q5UZH3_HALMA | 1 | Anion permease                                       | ynlA | rmAC2527 | 402 | 8.5 | 2 | 3 | 1      | V | ATLHDPALLLLDEPFTGLDEESLLR             | V | 3 | 2777.4487 | 2777.4497 | 0.001005  | 0       | 0.36   | 6.655 | 0.5   | 0   | 1  | 43 | 96  | 2 | 0 | 1 |
| Q5UZH3_HALMA | 1 | Anion permease                                       | ynlA | rmAC2527 | 402 | 8.5 | 2 | 3 | 1      | G | VGVEGITIDYSR                          | G | 2 | 1243.6772 | 1243.6755 | -0.001713 | 0       | -1.38  | 2.439 | 0.268 | 0.3 | 1  | 15 | 22  | 2 | 0 | 1 |
| Q5UZH3_HALMA | 1 | Anion permease                                       | ynlA | rmAC2527 | 402 | 8.5 | 2 | 3 | 1      | R | AVVYLADREPLPALNHGETVTR                | F | 3 | 2613.3187 | 2613.3082 | -0.010553 | 0       | -4.04  | 5.338 | 0.449 | 0   | 1  | 35 | 88  | 2 | 1 | 1 |
| Q5UZH3_HALMA | 1 | Anion permease                                       | ynlA | rmAC2527 | 402 | 8.5 | 2 | 3 | 1      | R | GTPTAAQGTLDGLSPDAPGALSAGISQAASLAGENAR | Y | 3 | 3493.7285 | 3494.7401 | 1.011161  | -1.0034 | 2.36   | 5.315 | 0.486 | 0   | 1  | 39 | 148 | 2 | 0 | 1 |
| Q5UZH3_HALMA | 1 | Anion permease                                       | ynlA | rmAC2527 | 402 | 8.5 | 2 | 3 | 1      | R | SLLPQNGVTGRELVEDGGVAVLAQDNLPQR        | V | 3 | 3289.6902 | 3289.6942 | 0.004012  | 0       | 1.22   | 4.652 | 0.455 | 0   | 1  | 43 | 124 | 2 | 1 | 1 |
| Q5UZH3_HALMA | 1 | Anion permease                                       | ynlA | rmAC2527 | 402 | 8.5 | 2 | 3 | 1      | R | AGLVDILAR                             | V | 2 | 926.5549  | 926.5454  | -0.009476 | 0       | -10.23 | 2.224 | 0.141 | 0.4 | 1  | 14 | 16  | 2 | 0 | 1 |
| Q5UZH3_HALMA | 1 | Anion permease                                       | ynlA | rmAC2527 | 402 | 8.5 | 2 | 3 | 1      | R | AGLVDILAR                             | V | 2 | 926.5549  | 926.5454  | -0.009476 | 0       | -10.23 | 2.649 | 0.364 | 0   | 3  | 12 | 16  | 2 | 0 | 1 |
| Q5UZH3_HALMA | 1 | Anion permease                                       | ynlA | rmAC2527 | 402 | 8.5 | 2 | 3 | 1      | R | GAEVFAILLLEK                          | R | 3 | 1398.7606 | 1398.7598 | -0.000776 | 0       | -0.55  | 3.069 | 0.337 | 0   | 1  | 25 | 48  | 2 | 0 | 1 |
| Q5UZH3_HALMA | 1 | Anion permease                                       | ynlA | rmAC2527 | 402 | 8.5 | 2 | 3 | 1      | S | EHDLYNEYDEDLLLDEIGDETFSHWR            | S | 4 | 3252.416  | 3253.4109 | 0.994871  | -1.0034 | -2.61  | 5.003 | 0.497 | 0   | 1  | 44 | 150 | 2 | 0 | 1 |
| Q5UZH3_HALMA | 1 | Anion permease                                       | ynlA | rmAC2527 | 402 | 8.5 | 2 | 3 | 1      | S | EHDLYNEYDEDLLLDEIGDETFSHWR            | S | 4 | 3252.416  | 3252.424  | 0.007996  | 0       | 2.46   | 4.885 | 0.437 | 0   | 1  | 43 | 150 | 2 | 0 | 1 |
| Q5UZH3_HALMA | 1 | Anion permease                                       | ynlA | rmAC2527 | 402 | 8.5 | 2 | 3 | 1      | R | EHDLYNEYDEDLLLDEIGDETFSHWR            | S | 3 | 3252.416  | 3252.4224 | 0.006361  | 0       | 1.96   | 4.829 | 0.433 | 0   | 1  | 30 | 100 | 2 | 0 | 1 |
| Q5UZH3_HALMA | 1 | Anion permease                                       | ynlA | rmAC2527 | 402 | 8.5 | 2 | 3 | 1      | Y | ASATTLFLTGGLHAATR                     | Y | 2 | 1698.9417 | 1700.8548 | 1.913108  | -2.0067 | -55.09 | 4.707 | 0.355 | 0   | 1  | 21 | 32  | 2 | 0 | 1 |
| Q5UZH3_HALMA | 1 | Anion permease                                       | ynlA | rmAC2527 | 402 | 8.5 | 2 | 3 | 1      | Y | ASATTLFLTGGLHAATR                     | Y | 3 | 1698.9417 | 1698.9406 | -0.001151 | 0       | -0.68  | 4.276 | 0.526 | 0   | 1  | 35 | 64  | 2 | 0 | 1 |
| Q5UZH3_HALMA | 1 | Anion permease                                       | ynlA | rmAC2527 | 402 | 8.5 | 2 | 3 | 1      | Y | ASATTLFLTGGLHAATR                     | Y | 3 | 1698.9417 | 1699.9491 | 1.007394  | -1.0034 | 2.38   | 5.089 | 0.505 | 0   | 1  | 36 | 64  | 2 | 0 | 1 |
| Q5UZH3_HALMA | 1 | Anion permease                                       | ynlA | rmAC2527 | 402 | 8.5 | 2 | 3 | 1      | E | SLDDALEIHDKVKQQAAR                    | E | 2 | 1907.9701 | 1907.9723 | 0.00214   | 0       | 1.12   | 4.837 | 0.507 | 0   | 1  | 21 | 32  | 2 | 1 | 1 |
| Q5UZH3_HALMA | 1 | Anion permease                                       | ynlA | rmAC2527 | 402 | 8.5 | 2 | 3 | 1      | E | SLDDALEIHDKVKQQAAR                    | E | 2 | 1907.9701 | 1907.9703 | 0.000173  | 0       | 0.09   | 5.43  | 0.422 | 0   | 1  | 35 | 64  | 2 | 1 | 1 |
| Q5UZH3_HALMA | 1 | Anion permease                                       | ynlA | rmAC2527 | 402 | 8.5 | 2 | 3 | 1      | K | SLDDALEIHDKVKQQAAR                    | E | 3 | 1907.9701 | 1907.9696 | -0.000559 | 0       | -0.29  | 4.57  | 0.463 | 0   | 1  | 30 | 64  | 2 | 1 | 1 |
| Q5UZH3_HALMA | 1 | Anion permease                                       | ynlA | rmAC2527 | 402 | 8.5 | 2 | 3 | 1      | R | GMEVFPVPESTGEESDFLSDLLFR              | F | 2 | 2603.2101 | 2603.1922 | -0.017889 | 0       | -6.87  | 3.046 | 0.438 | 0   | 1  | 19 | 44  | 2 | 0 | 1 |
| Q5UZH3_HALMA | 1 | Anion permease                                       | ynlA | rmAC2527 | 402 | 8.5 | 2 | 3 | 1      | R | AAAEVLAQTYDDVELVLVSDGNRDVYK           | Q | 3 | 3039.5037 | 3039.507  | 0.003256  | 0       | 1.07   | 4.046 | 0.358 | 0   | 2  | 26 | 108 | 2 | 1 | 1 |
| Q5UZH3_HALMA | 1 | Anion permease                                       | ynlA | rmAC2527 | 402 | 8.5 | 2 | 3 | 1      | F | GMEVFPVPESTGEESDFLSDLLFR              | F | 2 | 2603.2101 | 2604.4254 | 1.215324  | -1.0034 | 81.43  | 3.607 | 0.492 | 0   | 1  | 21 | 44  | 2 | 0 | 1 |
| Q5UZH3_HALMA | 1 | Anion permease                                       | ynlA | rmAC2527 | 402 | 8.5 | 2 | 3 | 1      | R | IQADAEASGVDDATTTLK                    | H | 2 | 1689.8421 | 1689.8419 | -0.000231 | 0       | -0.14  | 4.158 | 0.459 | 0   | 1  | 21 | 32  | 2 | 0 | 1 |
| Q5UZH3_HALMA | 1 | Anion permease                                       | ynlA | rmAC2527 | 402 | 8.5 | 2 | 3 | 1      | R | IQADAEASGVDDATTTLK                    | H | 2 | 1689.8421 | 1689.8254 | -0.016676 | 0       | -9.87  | 4.851 | 0.515 | 0   | 1  | 24 | 32  | 2 | 0 | 1 |
| Q5UZH3_HALMA | 1 | Anion permease                                       | ynlA | rmAC2527 | 402 | 8.5 | 2 | 3 | 1      | R | SLLGSITDKVLR                          | L | 2 | 1300.7714 | 1300.7735 | 0.002109  | 0       | 1.62   | 2.994 | 0.403 | 0   | 1  | 18 | 22  | 2 | 1 | 1 |
| Q5UZH3_HALMA | 1 | Anion permease                                       | ynlA | rmAC2527 | 402 | 8.5 | 2 | 3 | 1      | D | ALAMDPELLLFDEPTSLDPELVGEVVEVMR        | D | 3 | 3397.7037 | 3398.7082 | 1.004447  | -1.0034 | 0.32   | 4.669 | 0.451 | 0   | 1  | 39 | 120 | 2 | 0 | 1 |
| Q5UZH3_HALMA | 1 | Anion permease                                       | ynlA |          |     |     |   |   |        |   |                                       |   |   |           |           |           |         |        |       |       |     |    |    |     |   |   |   |

|                  |        |                                                                                                         |                 |          |     |      |   |   |        |   |                                       |   |   |           |           |           |         |         |       |       |     |    |    |     |   |   |   |
|------------------|--------|---------------------------------------------------------------------------------------------------------|-----------------|----------|-----|------|---|---|--------|---|---------------------------------------|---|---|-----------|-----------|-----------|---------|---------|-------|-------|-----|----|----|-----|---|---|---|
| Q5V3I3_HALMA     | 0.9985 | Hypothetical protein                                                                                    | <i>rmAC0936</i> | rmAC0936 | 128 | 18   | 2 | 3 | 1      | R | SELEEHLQQTEDKQDE                      | - | 2 | 1956.8548 | 1956.8541 | -0.000724 | 0       | -0.37   | 3.755 | 0.43  | 0   | 1  | 17 | 30  | 2 | 1 | 1 |
| Q5V3I3_HALMA     | 0.9985 | Hypothetical protein                                                                                    | <i>rmAC0936</i> | rmAC0936 | 128 | 18   | 2 | 3 | 0.9167 | R | LLGLEWK                               | A | 2 | 857.5011  | 857.5054  | 0.004324  | 0       | 5.04    | 1.854 | 0.065 | 0.6 | 4  | 11 | 12  | 2 | 0 | 1 |
| Q5V3I3_HALMA     | 0.9985 | Hypothetical protein                                                                                    | <i>rmAC0936</i> | rmAC0936 | 128 | 18   | 2 | 3 | 1      | R | SELEEHLQQTEDKQDE                      | - | 2 | 1956.8548 | 1956.8548 | 0.000008  | 0       | 0.00    | 3.155 | 0.454 | 0   | 1  | 16 | 30  | 2 | 1 | 1 |
| Q5V1V8_HALMA     | 0.9983 | Hypothetical protein                                                                                    | <i>rmAC1576</i> | rmAC1576 | 310 | 6.1  | 2 | 3 | 0.9602 | R | FLDWLAK                               | T | 2 | 891.4854  | 891.4855  | 0.000085  | 0       | 0.10    | 1.965 | 0.091 | 2   | 6  | 12 | 12  | 2 | 0 | 1 |
| Q5V1V8_HALMA     | 0.9983 | Hypothetical protein                                                                                    | <i>rmAC1576</i> | rmAC1576 | 310 | 6.1  | 2 | 3 | 0.9901 | R | FLDWLAK                               | T | 2 | 891.4854  | 892.2254  | 0.740024  | -1.0034 | -295.38 | 2.214 | 0.149 | 2.2 | 26 | 11 | 12  | 2 | 0 | 1 |
| Q5V1V8_HALMA     | 0.9983 | Hypothetical protein                                                                                    | <i>rmAC1576</i> | rmAC1576 | 310 | 6.1  | 2 | 3 | 0.9939 | - | MKDIYFDVDWTK                          | N | 3 | 1559.733  | 1559.7082 | -0.024853 | 0       | -15.93  | 2.419 | 0.18  | 0.5 | 1  | 20 | 44  | 2 | 1 | 1 |
| Q5UYPS_HALMA     | 0.9979 | Sec-independent protein translocase TatC                                                                | <i>tatC2</i>    | rmAC2858 | 539 | 4.8  | 2 | 3 | 0.9998 | R | LNQFSLPR                              | N | 2 | 1086.6186 | 1086.6254 | 0.006824  | 0       | 6.28    | 2.446 | 0.262 | 0   | 1  | 13 | 16  | 2 | 0 | 1 |
| Q5UYPS_HALMA     | 0.9979 | Sec-independent protein translocase TatC                                                                | <i>tatC2</i>    | rmAC2858 | 539 | 4.8  | 2 | 3 | 0.9998 | R | LNQFSLPR                              | N | 2 | 1086.6186 | 1086.6254 | 0.006824  | 0       | 6.28    | 2.552 | 0.224 | 0.1 | 1  | 15 | 16  | 2 | 0 | 1 |
| Q5UXM0_HALMA     | 0.9973 | TRK potassium uptake system protein                                                                     | <i>trkA3</i>    | rmAC3289 | 228 | 17.1 | 2 | 3 | 0.9996 | R | AVADIAQNLQLVEFTIQR                    | Q | 3 | 2028.1004 | 2028.1018 | 0.001343  | 0       | 0.66    | 2.764 | 0.255 | 0.1 | 6  | 23 | 68  | 2 | 0 | 1 |
| Q5UXM0_HALMA     | 0.9973 | TRK potassium uptake system protein                                                                     | <i>trkA3</i>    | rmAC3289 | 228 | 17.1 | 2 | 3 | 1      | R | AVADIAQNLQLVEFTIQR                    | Q | 3 | 2028.1004 | 2028.0992 | -0.00122  | 0       | -0.60   | 3.033 | 0.377 | 0   | 5  | 21 | 68  | 2 | 0 | 1 |
| Q5V665_HALMA     | 0.9971 | Probable protease HtpX-like (EC 3.4.24.-)                                                               | <i>htpX2</i>    | pNG7291  | 274 | 15.3 | 3 | 3 | 1      | R | LMVMDMGVNPFAFVGR                      | K | 2 | 1706.8306 | 1708.8254 | 1.994824  | -2.0067 | -6.96   | 4.853 | 0.444 | 0   | 1  | 25 | 30  | 2 | 0 | 1 |
| Q5V3B2_HALMA     | 0.9951 | Methanol dehydrogenase regulatory protein                                                               | <i>morR6</i>    | rmAC1025 | 336 | 9.8  | 2 | 3 | 0.999  | R | HITVAMLTR                             | G | 2 | 1040.5801 | 1040.5854 | 0.005324  | 0       | 5.12    | 2.149 | 0.226 | 0   | 1  | 12 | 16  | 2 | 0 | 1 |
| Q5UWE8_HALMA     | 0.981  | Branched-chain amino acid ABC transporter permease protein                                              | <i>livH-9</i>   | rmB0227  | 674 | 2.8  | 1 | 3 | 0.9926 | R | LETANNADGVSVDMEPEVR                   | S | 2 | 2060.8957 | 2060.8966 | 0.000856  | 0       | 0.42    | 2.402 | 0.131 | 0.5 | 1  | 16 | 36  | 2 | 0 | 1 |
| Q5UWE8_HALMA     | 0.981  | Branched-chain amino acid ABC transporter permease protein                                              | <i>livH-9</i>   | rmB0227  | 674 | 2.8  | 1 | 3 | 1      | R | LETANNADGVSVDMEPEVR                   | S | 2 | 2060.8957 | 2060.9254 | 0.029724  | 0       | 14.42   | 2.871 | 0.41  | 0   | 1  | 18 | 36  | 2 | 0 | 1 |
| Q5UWE8_HALMA     | 0.981  | Branched-chain amino acid ABC transporter permease protein                                              | <i>livH-9</i>   | rmB0227  | 674 | 2.8  | 1 | 3 | 1      | R | LETANNADGVSVDMEPEVR                   | S | 2 | 2060.8957 | 2060.8966 | 0.000856  | 0       | 0.42    | 3.452 | 0.457 | 0   | 1  | 20 | 36  | 2 | 0 | 1 |
| Q5UZ60_HALMA     | 0.981  | Hypothetical protein                                                                                    | <i>rmAC2665</i> | rmAC2665 | 324 | 4.6  | 1 | 3 | 1      | R | ALALAPLVLVPLALR                       | T | 2 | 1529.0068 | 1529.0063 | -0.000502 | 0       | -0.33   | 3.463 | 0.473 | 0   | 1  | 23 | 28  | 2 | 0 | 1 |
| Q5UZ60_HALMA     | 0.981  | Hypothetical protein                                                                                    | <i>rmAC2665</i> | rmAC2665 | 324 | 4.6  | 1 | 3 | 1      | R | ALALAPLVLVPLALR                       | T | 2 | 1529.0068 | 1529.0073 | 0.000474  | 0       | 0.31    | 4.249 | 0.393 | 0   | 1  | 24 | 28  | 2 | 0 | 1 |
| Q5UZ60_HALMA     | 0.981  | Hypothetical protein                                                                                    | <i>rmAC2665</i> | rmAC2665 | 324 | 4.6  | 1 | 3 | 1      | R | ALALAPLVLVPLALR                       | T | 2 | 1529.0068 | 1529.0083 | 0.001451  | 0       | 0.95    | 3.629 | 0.472 | 0   | 1  | 22 | 28  | 2 | 0 | 1 |
| Q5UZS9_HALMA     | 0.981  | Hypothetical protein                                                                                    | <i>rmAC2411</i> | rmAC2411 | 137 | 12.4 | 1 | 3 | 1      | R | GEAYNEWIDDLYDRFLP                     | - | 2 | 2114.9585 | 2114.9542 | -0.004326 | 0       | -2.05   | 3.221 | 0.425 | 0   | 1  | 19 | 32  | 2 | 1 | 1 |
| Q5UZS9_HALMA     | 0.981  | Hypothetical protein                                                                                    | <i>rmAC2411</i> | rmAC2411 | 137 | 12.4 | 1 | 3 | 0.9996 | R | GEAYNEWIDDLYDRFLP                     | - | 2 | 2114.9585 | 2114.9566 | -0.001885 | 0       | -0.89   | 2.915 | 0.302 | 0   | 1  | 18 | 32  | 2 | 1 | 1 |
| Q5UZS9_HALMA     | 0.981  | Hypothetical protein                                                                                    | <i>rmAC2411</i> | rmAC2411 | 137 | 12.4 | 1 | 3 | 0.9993 | R | GEAYNEWIDDLYDRFLP                     | - | 2 | 2114.9585 | 2114.9603 | 0.001777  | 0       | 0.84    | 2.915 | 0.291 | 0   | 1  | 19 | 32  | 2 | 1 | 1 |
| Q5V2C4_HALMA     | 0.981  | Cytochrome c oxidase polypeptide III (EC 1.9.3.1)                                                       | <i>cyoC</i>     | rmAC1399 | 287 | 3.5  | 1 | 3 | 1      | R | GYGQYSAER                             | H | 2 | 1192.5149 | 1192.5149 | -0.000058 | 0       | -0.05   | 2.973 | 0.392 | 0   | 1  | 17 | 18  | 2 | 0 | 1 |
| Q5V2C4_HALMA     | 0.981  | Cytochrome c oxidase polypeptide III (EC 1.9.3.1)                                                       | <i>cyoC</i>     | rmAC1399 | 287 | 3.5  | 1 | 3 | 1      | R | GYGQYSAER                             | H | 2 | 1192.5149 | 1192.5157 | 0.000797  | 0       | 0.67    | 2.76  | 0.465 | 0   | 1  | 16 | 18  | 2 | 0 | 1 |
| Q5V2C4_HALMA     | 0.981  | Cytochrome c oxidase polypeptide III (EC 1.9.3.1)                                                       | <i>cyoC</i>     | rmAC1399 | 287 | 3.5  | 1 | 3 | 1      | R | GYGQYSAER                             | H | 2 | 1192.5149 | 1192.5141 | -0.00079  | 0       | -0.66   | 2.523 | 0.376 | 0   | 1  | 16 | 18  | 2 | 0 | 1 |
| RL7A_HALMAReview | 0.981  | 50S ribosomal protein L7Ae (Hs6)                                                                        | <i>rpl7ae</i>   | rmAC0103 | 120 | 20   | 1 | 3 | 0.9841 | M | PVYVDFDVPADLEDDALEALEVAR              | D | 3 | 2660.2857 | 2661.2782 | 0.992447  | -1.0034 | -4.10   | 3.436 | 0.272 | 0.1 | 3  | 26 | 92  | 2 | 0 | 1 |
| RL7A_HALMAReview | 0.981  | 50S ribosomal protein L7Ae (Hs6)                                                                        | <i>rpl7ae</i>   | rmAC0103 | 120 | 20   | 1 | 3 | 0.9924 | M | PVYVDFDVPADLEDDALEALEVAR              | D | 3 | 2660.2857 | 2660.2853 | -0.000424 | 0       | -0.16   | 3.421 | 0.277 | 0   | 1  | 30 | 92  | 2 | 0 | 1 |
| RL7A_HALMAReview | 0.981  | 50S ribosomal protein L7Ae (Hs6)                                                                        | <i>rpl7ae</i>   | rmAC0103 | 120 | 20   | 1 | 3 | 0.981  | M | PVYVDFDVPADLEDDALEALEVAR              | D | 3 | 2660.2857 | 2660.295  | 0.009281  | 0       | 3.49    | 3.428 | 0.279 | 0.1 | 6  | 23 | 92  | 2 | 0 | 1 |
| RLA0_HALMAReview | 0.981  | 50S ribosomal protein L10E (Ribosomal protein L10) (Acidic ribosomalprotein P0 homolog) (L10E) (HMA110) | <i>rplP0</i>    | rmAC1417 | 348 | 8.9  | 1 | 3 | 1      | R | AVFADGVLFEPEEELDIDEYRSIDIQAAAGR       | A | 3 | 3437.6627 | 3437.6691 | 0.006365  | 0       | 1.85    | 3.302 | 0.389 | 0   | 1  | 33 | 120 | 2 | 1 | 1 |
| RLA0_HALMAReview | 0.981  | 50S ribosomal protein L10E (Ribosomal protein L10) (Acidic ribosomalprotein P0 homolog) (L10E) (HMA110) | <i>rplP0</i>    | rmAC1417 | 348 | 8.9  | 1 | 3 | 1      | R | AVFADGVLFEPEEELDIDEYRSIDIQAAAGR       | A | 3 | 3437.6627 | 3437.6706 | 0.00783   | 0       | 2.28    | 3.965 | 0.329 | 0   | 7  | 24 | 120 | 2 | 1 | 1 |
| RLA0_HALMAReview | 0.981  | 50S ribosomal protein L10E (Ribosomal protein L10) (Acidic ribosomalprotein P0 homolog) (L10E) (HMA110) | <i>rplP0</i>    | rmAC1417 | 348 | 8.9  | 1 | 3 | 1      | R | AVFADGVLFEPEEELDIDEYRSIDIQAAAGR       | A | 3 | 3437.6627 | 3437.6654 | 0.002703  | 0       | 0.79    | 3.889 | 0.352 | 0   | 2  | 27 | 120 | 2 | 1 | 1 |
| Q5V2I5_HALMA     | 0.9792 | Hypothetical protein                                                                                    | <i>rmAC1335</i> | rmAC1335 | 346 | 6.1  | 1 | 3 | 0.9972 | K | ILPAKDDVDAFIQDIQFVLGR                 | A | 3 | 2372.274  | 2372.2769 | 0.002853  | 0       | 1.20    | 3.178 | 0.179 | 0.2 | 1  | 30 | 80  | 2 | 1 | 1 |
| Q5V2I5_HALMA     | 0.9792 | Hypothetical protein                                                                                    | <i>rmAC1335</i> | rmAC1335 | 346 | 6.1  | 1 | 3 | 0.9999 | K | ILPAKDDVDAFIQDIQFVLGR                 | A | 3 | 2372.274  | 2372.2749 | 0.000839  | 0       | 0.35    | 3.749 | 0.285 | 0.1 | 2  | 30 | 80  | 2 | 1 | 1 |
| Q5V2I5_HALMA     | 0.9792 | Hypothetical protein                                                                                    | <i>rmAC1335</i> | rmAC1335 | 346 | 6.1  | 1 | 3 | 0.9982 | K | ILPAKDDVDAFIQDIQFVLGR                 | A | 3 | 2372.274  | 2372.2743 | 0.00029   | 0       | 0.12    | 3.265 | 0.189 | 0.2 | 1  | 29 | 80  | 2 | 1 | 1 |
| IF1A_HALMAReview | 1      | Translation initiation factor 1A (aIF-1A)                                                               | <i>ei1f1a</i>   | rmAC2474 | 95  | 22.1 | 2 | 2 | 1      | R | MPPEEDVEFAVVMMDLGGANRVK               | V | 3 | 2379.1273 | 2379.1276 | 0.000261  | 0       | 0.11    | 5.174 | 0.422 | 0   | 1  | 39 | 80  | 2 | 1 | 1 |
| IF1A_HALMAReview | 1      | Translation initiation factor 1A (aIF-1A)                                                               | <i>ei1f1a</i>   | rmAC2474 | 95  | 22.1 | 2 | 2 | 1      | R | MPPEEDVEFAVVMMDLGGANRVK               | V | 3 | 2151.9639 | 2151.9625 | -0.001378 | 0       | -0.64   | 3.696 | 0.416 | 0   | 1  | 30 | 72  | 2 | 0 | 1 |
| Q5UXE8_HALMA     | 1      | Hypothetical protein                                                                                    | <i>rmAC3368</i> | rmAC3368 | 291 | 16.8 | 2 | 2 | 0.9998 | R | FGVSYDADIETVQAIIINAARDLDHVSEKPAPTAR   | V | 5 | 3769.8911 | 3770.8981 | 1.006942  | -1.0034 | 0.95    | 3.73  | 0.221 | 0.3 | 1  | 58 | 272 | 2 | 1 | 1 |
| Q5UXE8_HALMA     | 1      | Hypothetical protein                                                                                    | <i>rmAC3368</i> | rmAC3368 | 291 | 16.8 | 2 | 2 | 0.9996 | R | VGSLASTAVILTGR                        | I | 2 | 1401.7827 | 1401.7821 | -0.000646 | 0       | -0.46   | 2.549 | 0.249 | 0.2 | 2  | 14 | 26  | 2 | 0 | 1 |
| Q5UXR2_HALMA     | 1      | Hypothetical protein                                                                                    | <i>rmAC3242</i> | rmAC3242 | 777 | 4.8  | 2 | 2 | 1      | R | FGSRGDDVGGGLAHYQIPTFSDGSHK            | A | 4 | 2776.2841 | 2776.2863 | 0.0022    | 0       | 0.79    | 4.858 | 0.388 | 0   | 1  | 48 | 150 | 2 | 1 | 1 |
| Q5UXR2_HALMA     | 1      | Hypothetical protein                                                                                    | <i>rmAC3242</i> | rmAC3242 | 777 | 4.8  | 2 | 2 | 0.9999 | R | FGSRGDDVGGGLAHYQIPTFSDGSHKAFVVPGGTVK  | G | 5 | 3802.8703 | 3802.8753 | 0.004976  | 0       | 1.31    | 3.315 | 0.192 | 0.4 | 1  | 63 | 288 | 2 | 2 | 1 |
| Q5UY78_HALMA     | 1      | Hypothetical protein                                                                                    | <i>rmAC3056</i> | rmAC3056 | 880 | 1.8  | 2 | 2 | 0.9999 | R | SPAALLDALR                            | A | 2 | 1025.5869 | 1025.5854 | -0.001476 | 0       | -1.44   | 2.327 | 0.311 | 0   | 1  | 16 | 18  | 2 | 0 | 1 |
| Q5UY78_HALMA     | 1      | Hypothetical protein                                                                                    | <i>rmAC3056</i> | rmAC3056 | 880 | 1.8  | 2 | 2 | 1      | R | SPAALLDALRAWISER                      | F | 3 | 1767.9631 | 1768.9582 | 0.995047  | -1.0034 | -4.70   | 4.223 | 0.26  | 0   | 1  | 27 | 60  | 2 | 1 | 1 |
| Q5UZ82_HALMA     | 1      | Histidine triad protein                                                                                 | <i>hit2</i>     | rmAC2638 | 142 | 44.4 | 2 | 2 | 1      | R | TVYEDDTVLAFLDANPLSPGHTLVIPK           | A | 3 | 2924.5171 | 2925.5182 | 1.001047  | -1.0034 | -0.79   | 3.56  | 0.42  | 0   | 1  | 29 | 104 | 2 | 0 | 1 |
| Q5UZ82_HALMA     | 1      | Histidine triad protein                                                                                 | <i>hit2</i>     | rmAC2638 | 142 | 44.4 | 2 | 2 | 1      | R | FEDDGGRPPIHVLVNDRPDISDDELDDIENDIVAEQA | - | 4 | 4034.8617 | 4034.8708 | 0.009073  | 0       | 2.25    | 4.465 | 0.315 | 0   | 1  | 53 | 210 | 2 | 0 | 1 |
| Q5V0S7_HALMA     | 1      | Hypothetical protein                                                                                    | <i>rmAC2016</i> | rmAC2016 | 128 | 16.4 | 1 | 2 | 1      | D | PPATDGTVAALSEEELYAIVR                 | V | 2 | 2201.1216 | 2201.1197 | -0.001899 | 0       | -0.86   | 6.424 | 0.439 | 0   | 1  | 29 | 40  | 1 | 0 | 1 |
| Q5V0S7_HALMA     | 1      | Hypothetical protein                                                                                    | <i>rmAC2016</i> | rmAC2016 | 128 | 16.4 | 1 | 2 | 1      | D | PPATDGTVAALSEEELYAIVR                 | V | 3 | 2201.1216 | 2203.1182 | 1.996547  | -2.0067 | -4.61   | 4.47  | 0.439 | 0   | 1  | 27 | 80  | 1 | 0 | 1 |
| Q5V2G1_HALMA     | 1      | Hypothetical protein                                                                                    | <i>rmAC1361</i> | rmAC1361 | 165 | 23   | 2 | 2 | 1      | R | GLPMTAGSDAHAEVMVGQAVTNVGTDER          | T | 3 | 2826.3276 | 2826.325  | -0.002651 | 0       | -0.94   | 3.907 | 0.385 | 0   | 1  | 32 | 108 | 2 | 0 | 1 |
| Q5V2G1_HALMA     | 1      | Hypothetical protein                                                                                    | <i>rmAC1361</i> | rmAC1361 | 165 | 23   | 2 | 2 | 1      | R | TVEAILDAIR                            | E | 2 | 1099.6237 | 1099.6254 | 0.001724  | 0       | 1.57    | 3.37  | 0.359 | 0   | 1  | 17 | 18  | 2 | 0 | 1 |
| Q5V3K1_HALMA     | 1      | Orotate phosphoribosyltransferase (EC 2.4.2.10)                                                         | <i>pyrE2</i>    | rmAC0927 | 212 | 11.8 | 2 | 2 | 1      | R | GVPPVYSLQVIR                          | V | 2 | 1342.7972 | 1344.6854 | 1.888224  | -2.0067 | -88.23  | 3.979 | 0.336 | 0   | 1  | 18 | 22  | 2 | 0 | 1 |
| Q5V3K1_HALMA     | 1      | Orotate phosphoribosyltransferase (EC 2.4.2.10)                                                         | <i>pyrE2</i>    | rmAC0927 | 212 | 11.8 | 2 | 2 | 1      | K | KGGDDVLTIGIEK                         | A | 2 | 1401.7351 | 1401.7361 | 0.000934  | 0       | 0.67    | 3.802 | 0     |     |    |    |     |   |   |   |

|                  |        |                                                                      |                 |          |      |      |   |   |        |   |                             |   |   |           |           |           |         |        |       |       |     |    |    |     |   |   |   |
|------------------|--------|----------------------------------------------------------------------|-----------------|----------|------|------|---|---|--------|---|-----------------------------|---|---|-----------|-----------|-----------|---------|--------|-------|-------|-----|----|----|-----|---|---|---|
| Q5V731_HALMA     | 0.9965 | DSBA-like thioredoxin                                                | <i>trx</i>      | pNG6070  | 328  | 10.1 | 2 | 2 | 1      | R | LVFEAQAAGVSETASVR           | T | 2 | 1733.8948 | 1733.8922 | -0.002638 | 0       | -1.52  | 4.072 | 0.455 | 0   | 1  | 22 | 32  | 2 | 0 | 1 |
| Q5UZN0_HALMA     | 0.9962 | Branched-chain amino acid ABC transporter permease protein           | <i>livM-5</i>   | rmAC2466 | 369  | 6.8  | 2 | 2 | 0.9979 | M | STLDDVGTYSFR                | E | 2 | 1194.588  | 1194.593  | 0.004967  | 0       | 4.16   | 2.812 | 0.321 | 0   | 1  | 17 | 20  | 2 | 0 | 1 |
| RL24_HALMAReview | 0.9961 | S0S ribosomal protein L24p (Hmal24) (HI16) (HI15)                    | <i>rpl24p</i>   | rmAC1601 | 120  | 19.2 | 2 | 2 | 1      | K | AVIHVEDVTLTK                | T | 3 | 1351.7347 | 1351.7482 | 0.013467  | 0       | 9.95   | 3.098 | 0.41  | 0   | 32 | 19 | 44  | 2 | 0 | 1 |
| PGK_HALMAReview  | 0.9951 | Phosphoglycerate kinase (EC 2.7.2.3)                                 | <i>pgk</i>      | rmAC2364 | 400  | 6.5  | 1 | 2 | 1      | K | SQTEFVQTLKDEFDAYINDAYSAAHR  | S | 3 | 3018.3995 | 3018.5482 | 0.148647  | 0       | 49.25  | 3.51  | 0.33  | 0.1 | 1  | 26 | 100 | 2 | 1 | 1 |
| PGK_HALMAReview  | 0.9951 | Phosphoglycerate kinase (EC 2.7.2.3)                                 | <i>pgk</i>      | rmAC2364 | 400  | 6.5  | 1 | 2 | 1      | K | SQTEFVQTLKDEFDAYINDAYSAAHR  | S | 3 | 3018.3995 | 3019.5682 | 0.168647  | -1.0034 | 54.76  | 4.412 | 0.373 | 0   | 1  | 31 | 100 | 2 | 1 | 1 |
| Q5V3D5_HALMA     | 0.9951 | Hypothetical protein                                                 | <i>rmAC1001</i> | rmAC1001 | 272  | 18   | 2 | 2 | 1      | R | ALKDVMDDFLVASTAADLIDEGRLTMR | L | 3 | 2965.4889 | 2966.419  | 0.930043  | -1.0034 | -24.72 | 4.627 | 0.429 | 0   | 1  | 33 | 104 | 2 | 2 | 1 |
| Q5V3D5_HALMA     | 0.9951 | Hypothetical protein                                                 | <i>rmAC1001</i> | rmAC1001 | 272  | 18   | 2 | 2 | 0.9801 | R | ALKDVMDDFLVASTAADLIDEGRLTMR | L | 3 | 2965.4889 | 2966.4069 | 0.917958  | -1.0034 | -28.80 | 3.322 | 0.106 | 0.3 | 1  | 27 | 104 | 2 | 2 | 1 |
| RS24_HALMAReview | 0.9951 | 30S ribosomal protein S24e (HS15) (E1.2)                             | <i>rps24e</i>   | rmAC2488 | 102  | 33.3 | 2 | 2 | 1      | R | DSLAATLNLKDAEEVVVHK         | L | 3 | 1952.0214 | 1952.0218 | 0.000387  | 0       | 0.20   | 5.499 | 0.457 | 0   | 1  | 32 | 68  | 2 | 1 | 1 |
| RS24_HALMAReview | 0.9951 | 30S ribosomal protein S24e (HS15) (E1.2)                             | <i>rps24e</i>   | rmAC2488 | 102  | 33.3 | 2 | 2 | 1      | R | DSLAATLNLKDAEEVVVHK         | L | 3 | 1952.0214 | 1953.0168 | 0.995382  | -1.0034 | -4.08  | 4.37  | 0.4   | 0   | 1  | 31 | 68  | 2 | 1 | 1 |
| Q5V3G2_HALMA     | 0.9939 | Flavin-containing amino-oxidoreductase                               | <i>aor3</i>     | rmAC0970 | 344  | 10.8 | 2 | 2 | 0.999  | R | LLDDRLADPDWTDHQHWR          | Y | 4 | 2403.0992 | 2404.1061 | 1.006924  | -1.0034 | 1.49   | 2.547 | 0.179 | 1.4 | 1  | 34 | 108 | 2 | 1 | 1 |
| Q5UW9_HALMA      | 0.9934 | Branched-chain amino acid ABC transporter ATP-binding protein        | <i>livG-10</i>  | rmB0225  | 254  | 11   | 2 | 2 | 0.9939 | R | SLMLJEDHIDLVMR              | V | 3 | 1683.8688 | 1683.8706 | 0.001803  | 0       | 1.07   | 2.561 | 0.14  | 0.4 | 2  | 22 | 52  | 2 | 0 | 1 |
| Q5UW9_HALMA      | 0.9934 | Branched-chain amino acid ABC transporter ATP-binding protein        | <i>livG-10</i>  | rmB0225  | 254  | 11   | 2 | 2 | 0.9541 | R | FKGEDITNVAPHHR              | V | 4 | 1611.8005 | 1611.8012 | 0.000693  | 0       | 0.43   | 2.913 | 0.039 | 1.1 | 14 | 28 | 78  | 2 | 1 | 1 |
| Q5UWZ4_HALMA     | 0.989  | Hypothetical protein                                                 | <i>rmAC3543</i> | rmAC3543 | 153  | 12.4 | 2 | 2 | 0.9887 | R | RLTVLFR                     | E | 2 | 903.5654  | 903.5645  | -0.000875 | 0       | -0.97  | 2.278 | 0.093 | 0.2 | 13 | 8  | 12  | 2 | 0 | 1 |
| Q5UWZ4_HALMA     | 0.989  | Hypothetical protein                                                 | <i>rmAC3543</i> | rmAC3543 | 153  | 12.4 | 2 | 2 | 0.9552 | R | AALRELLGRGDD                | - | 3 | 1284.6786 | 1284.6982 | 0.019547  | 0       | 15.22  | 1.831 | 0.227 | 0.6 | 16 | 20 | 44  | 2 | 2 | 1 |
| Q5V5W2_HALMA     | 0.9855 | Acetyl-CoA carboxylase alpha subunit                                 | <i>accA</i>     | rmAC0004 | 451  | 7.1  | 2 | 2 | 0.9953 | R | IQEGIDSLAGYADIFHR           | N | 3 | 1903.9428 | 1903.9412 | -0.001579 | 0       | -0.83  | 2.682 | 0.137 | 0.2 | 1  | 25 | 64  | 2 | 0 | 1 |
| Q5UW67_HALMA     | 0.981  | Phosphonates ABC transporter permease protein                        | <i>phnD2</i>    | rmB0322  | 264  | 4.2  | 1 | 2 | 1      | K | LIAEAIEIDR                  | G | 2 | 1270.6769 | 1270.6769 | -0.000007 | 0       | -0.06  | 3.611 | 0.356 | 0   | 1  | 18 | 20  | 2 | 0 | 1 |
| Q5UW67_HALMA     | 0.981  | Phosphonates ABC transporter permease protein                        | <i>phnD2</i>    | rmB0322  | 264  | 4.2  | 1 | 2 | 1      | K | LIAEAIEIDR                  | G | 2 | 1270.6769 | 1270.6793 | 0.002371  | 0       | 1.87   | 3.587 | 0.388 | 0   | 1  | 18 | 20  | 2 | 0 | 1 |
| Q5UWB2_HALMA     | 0.981  | Zinc-transporting ATPase                                             | <i>zntA2</i>    | rmB0270  | 806  | 1.6  | 1 | 2 | 1      | R | RSEHPATAILTR                | A | 3 | 1463.8208 | 1463.8198 | -0.001039 | 0       | -0.71  | 3.73  | 0.452 | 0   | 1  | 24 | 48  | 2 | 0 | 1 |
| Q5UWB2_HALMA     | 0.981  | Zinc-transporting ATPase                                             | <i>zntA2</i>    | rmB0270  | 806  | 1.6  | 1 | 2 | 1      | R | RSEHPATAILTR                | A | 3 | 1463.8208 | 1463.8194 | -0.001405 | 0       | -0.96  | 3.126 | 0.28  | 0.1 | 1  | 24 | 48  | 2 | 0 | 1 |
| Q5UWJ5_HALMA     | 0.981  | Putative acyltransferase                                             | <i>rmB0171</i>  | rmB0171  | 278  | 3.6  | 1 | 2 | 1      | R | YPSLALVER                   | F | 2 | 1193.6444 | 1193.6454 | 0.000936  | 0       | 0.78   | 2.921 | 0.349 | 0   | 1  | 15 | 18  | 2 | 0 | 1 |
| Q5UWJ5_HALMA     | 0.981  | Putative acyltransferase                                             | <i>rmB0171</i>  | rmB0171  | 278  | 3.6  | 1 | 2 | 0.9997 | R | YPSLALVER                   | F | 2 | 1193.6444 | 1193.649  | 0.004598  | 0       | 3.85   | 3.017 | 0.173 | 0.1 | 2  | 15 | 18  | 2 | 0 | 1 |
| Q5UWM0_HALMA     | 0.981  | Hypothetical protein                                                 | <i>rmB0138</i>  | rmB0138  | 98   | 15.3 | 1 | 2 | 0.9991 | M | PSIDETVFGPEPSRR             | L | 3 | 1701.8686 | 1701.8657 | -0.002941 | 0       | -1.73  | 3.405 | 0.318 | 0   | 1  | 23 | 56  | 2 | 0 | 1 |
| Q5UWM0_HALMA     | 0.981  | Hypothetical protein                                                 | <i>rmB0138</i>  | rmB0138  | 98   | 15.3 | 1 | 2 | 0.9921 | M | PSIDETVFGPEPSRR             | L | 3 | 1701.8686 | 1701.8668 | -0.001842 | 0       | -1.08  | 2.789 | 0.293 | 0   | 1  | 24 | 56  | 2 | 0 | 1 |
| Q5UWQ3_HALMA     | 0.981  | Halocyanin-like                                                      | <i>hcp7</i>     | rmB0097  | 173  | 8.7  | 1 | 2 | 0.9998 | K | SQEGATYTTQTFDEAK            | T | 2 | 1674.7373 | 1675.7081 | 0.97078   | -1.0034 | -19.45 | 2.475 | 0.312 | 0   | 1  | 14 | 28  | 2 | 0 | 1 |
| Q5UWQ3_HALMA     | 0.981  | Halocyanin-like                                                      | <i>hcp7</i>     | rmB0097  | 173  | 8.7  | 1 | 2 | 1      | K | SQEGATYTTQTFDEAK            | T | 2 | 1674.7373 | 1675.7057 | 0.968338  | -1.0034 | -20.91 | 3.764 | 0.453 | 0   | 1  | 16 | 28  | 2 | 0 | 1 |
| Q5UWX0_HALMA     | 0.981  | Hypothetical protein                                                 | <i>rmB0019</i>  | rmB0019  | 148  | 11.5 | 1 | 2 | 1      | K | IGPFLLTGIIAMGITGIR          | W | 3 | 1728.996  | 1729.9882 | 0.992147  | -1.0034 | -6.48  | 3.747 | 0.356 | 0   | 4  | 23 | 64  | 2 | 0 | 1 |
| Q5UWX0_HALMA     | 0.981  | Hypothetical protein                                                 | <i>rmB0019</i>  | rmB0019  | 148  | 11.5 | 1 | 2 | 1      | K | IGPFLLTGIIAMGITGIR          | W | 3 | 1728.996  | 1729.9882 | 0.992147  | -1.0034 | -6.48  | 3.694 | 0.363 | 0   | 1  | 26 | 64  | 2 | 0 | 1 |
| Q5UX01_HALMA     | 0.981  | Multisubunit Na <sup>+</sup> /H <sup>+</sup> antiporter MnhG subunit | <i>mnhG2</i>    | rmAC3535 | 106  | 17.9 | 1 | 2 | 1      | R | AAQDQGEHPWTTGDEEDKS         | - | 2 | 2075.8919 | 2075.8912 | -0.000715 | 0       | -0.34  | 4.347 | 0.511 | 0   | 1  | 21 | 36  | 2 | 1 | 1 |
| Q5UX01_HALMA     | 0.981  | Multisubunit Na <sup>+</sup> /H <sup>+</sup> antiporter MnhG subunit | <i>mnhG2</i>    | rmAC3535 | 106  | 17.9 | 1 | 2 | 0.9855 | R | AAQDQGEHPWTTGDEEDKS         | - | 2 | 2075.8919 | 2076.8878 | 0.995867  | -1.0034 | -3.60  | 3.641 | 0.076 | 0   | 2  | 16 | 36  | 2 | 1 | 1 |
| Q5UX31_HALMA     | 0.981  | Hypothetical protein                                                 | <i>rmAC3503</i> | rmAC3503 | 51   | 47.1 | 1 | 2 | 1      | K | YVSEVLGEGHGEQEGNTSSGGPAA    | - | 2 | 2430.0571 | 2431.0654 | 1.008324  | -1.0034 | 2.05   | 4.154 | 0.45  | 0   | 1  | 19 | 46  | 2 | 0 | 1 |
| Q5UX31_HALMA     | 0.981  | Hypothetical protein                                                 | <i>rmAC3503</i> | rmAC3503 | 51   | 47.1 | 1 | 2 | 1      | K | YVSEVLGEGHGEQEGNTSSGGPAA    | - | 2 | 2430.0571 | 2431.0854 | 1.028324  | -1.0034 | 10.28  | 3.95  | 0.467 | 0   | 1  | 20 | 46  | 2 | 0 | 1 |
| Q5UX48_HALMA     | 0.981  | Hypothetical protein                                                 | <i>rmAC3481</i> | rmAC3481 | 106  | 20.8 | 1 | 2 | 1      | M | ADDESQYVHRPDTPEQATDTSR      | A | 3 | 2446.0633 | 2446.0631 | -0.000253 | 0       | -0.10  | 4.689 | 0.43  | 0   | 1  | 37 | 84  | 2 | 0 | 1 |
| Q5UX48_HALMA     | 0.981  | Hypothetical protein                                                 | <i>rmAC3481</i> | rmAC3481 | 106  | 20.8 | 1 | 2 | 1      | M | ADDESQYVHRPDTPEQATDTSR      | A | 3 | 2446.0633 | 2446.064  | 0.000662  | 0       | 0.27   | 4.706 | 0.412 | 0   | 1  | 31 | 84  | 2 | 0 | 1 |
| Q5UXC0_HALMA     | 0.981  | Hypothetical protein                                                 | <i>rmAC3402</i> | rmAC3402 | 166  | 9.6  | 1 | 2 | 0.9334 | R | NILSEDLADAIVTTAR            | T | 3 | 1700.8945 | 1700.8916 | -0.002962 | 0       | -1.74  | 2.453 | 0.039 | 0.3 | 1  | 22 | 60  | 2 | 0 | 1 |
| Q5UXC0_HALMA     | 0.981  | Hypothetical protein                                                 | <i>rmAC3402</i> | rmAC3402 | 166  | 9.6  | 1 | 2 | 1      | R | NILSEDLADAIVTTAR            | T | 3 | 1700.8945 | 1700.8872 | -0.007356 | 0       | -4.32  | 3.803 | 0.394 | 0   | 1  | 30 | 60  | 2 | 0 | 1 |
| Q5UXE3_HALMA     | 0.981  | Iron(III) dicitrate transport system permease protein FecD           | <i>hemU</i>     | rmAC3374 | 356  | 6.2  | 1 | 2 | 1      | R | ILLPTAALAGASFLVATDTLAR      | S | 3 | 2184.2518 | 2184.2528 | 0.001005  | 0       | 0.46   | 3.804 | 0.439 | 0   | 1  | 33 | 84  | 2 | 0 | 1 |
| Q5UXE3_HALMA     | 0.981  | Iron(III) dicitrate transport system permease protein FecD           | <i>hemU</i>     | rmAC3374 | 356  | 6.2  | 1 | 2 | 1      | R | ILLPTAALAGASFLVATDTLAR      | S | 3 | 2184.2518 | 2184.2526 | 0.000822  | 0       | 0.38   | 4.445 | 0.444 | 0   | 1  | 31 | 84  | 2 | 0 | 1 |
| Q5UXR6_HALMA     | 0.981  | Glucose-1-phosphate thymidyltransferase (EC 2.7.7.24)                | <i>rffH3</i>    | rmAC3238 | 251  | 6.8  | 1 | 2 | 1      | R | GEYEISDAIDLLLLHSGR          | T | 3 | 1886.9374 | 1887.9382 | 1.000747  | -1.0034 | -1.38  | 3.722 | 0.33  | 0   | 1  | 29 | 64  | 2 | 0 | 1 |
| Q5UXR6_HALMA     | 0.981  | Glucose-1-phosphate thymidyltransferase (EC 2.7.7.24)                | <i>rffH3</i>    | rmAC3238 | 251  | 6.8  | 1 | 2 | 1      | R | GEYEISDAIDLLLLHSGR          | T | 3 | 1886.9374 | 1886.9275 | -0.009973 | 0       | -5.29  | 3.898 | 0.441 | 0   | 1  | 31 | 64  | 2 | 0 | 1 |
| Q5UXZ8_HALMA     | 0.981  | Electron transfer flavoprotein beta subunit                          | <i>etfB1</i>    | rmAC3148 | 263  | 8.7  | 1 | 2 | 1      | K | EAHDDVEVTVTVTVPGETDETIR     | Q | 3 | 2497.182  | 2497.1788 | -0.00323  | 0       | -1.29  | 4.324 | 0.422 | 0   | 1  | 31 | 88  | 2 | 0 | 1 |
| Q5UXZ8_HALMA     | 0.981  | Electron transfer flavoprotein beta subunit                          | <i>etfB1</i>    | rmAC3148 | 263  | 8.7  | 1 | 2 | 1      | K | EAHDDVEVTVTVTVPGETDETIR     | Q | 3 | 2497.182  | 2497.1808 | -0.001216 | 0       | -0.49  | 4.133 | 0.37  | 0   | 1  | 34 | 88  | 2 | 0 | 1 |
| Q5UY11_HALMA     | 0.981  | Hypothetical protein                                                 | <i>rmAC3134</i> | rmAC3134 | 192  | 6.8  | 1 | 2 | 1      | R | LGSALHQGLINPR               | F | 3 | 1374.7732 | 1374.7727 | -0.000558 | 0       | -0.41  | 3.66  | 0.326 | 0   | 2  | 22 | 48  | 2 | 0 | 1 |
| Q5UY11_HALMA     | 0.981  | Hypothetical protein                                                 | <i>rmAC3134</i> | rmAC3134 | 192  | 6.8  | 1 | 2 | 1      | R | LGSALHQGLINPR               | F | 3 | 1374.7732 | 1374.7749 | 0.001639  | 0       | 1.19   | 3.4   | 0.311 | 0   | 21 | 20 | 48  | 2 | 0 | 1 |
| Q5UY36_HALMA     | 0.981  | Hypothetical protein                                                 | <i>rmAC3105</i> | rmAC3105 | 154  | 13   | 1 | 2 | 0.9861 | K | IVMFQDNEIFGPQDLWPLQR        | L | 3 | 2445.2151 | 2446.2082 | 0.993047  | -1.0034 | -4.21  | 2.209 | 0.149 | 1.3 | 1  | 26 | 76  | 2 | 0 | 1 |
| Q5UY36_HALMA     | 0.981  | Hypothetical protein                                                 | <i>rmAC3105</i> | rmAC3105 | 154  | 13   | 1 | 2 | 1      | K | IVMFQDNEIFGPQDLWPLQR        | L | 3 | 2445.2151 | 2445.2155 | 0.000352  | 0       | 0.14   | 3.711 | 0.319 | 0   | 1  | 36 | 76  | 2 | 0 | 1 |
| Q5UY54_HALMA     | 0.981  | Hypothetical protein                                                 | <i>rmAC3084</i> | rmAC3084 | 181  | 11   | 1 | 2 | 0.9998 | R | AGLGLAFGAMLGDIGASFLK        | R | 2 | 1908.0179 | 1908.8454 | 0.827524  | -1.0034 | -92.15 | 3.247 | 0.199 | 0   | 1  | 18 | 38  | 2 | 0 | 1 |
| Q5UY54_HALMA     | 0.981  | Hypothetical protein                                                 | <i>rmAC3084</i> | rmAC3084 | 181  | 11   | 1 | 2 | 1      | R | AGLGLAFGAMLGDIGASFLK        | R | 2 | 1908.0179 | 1908.0304 | 0.012445  | 0       | 6.52   | 3.671 | 0.543 | 0   | 1  | 19 | 38  | 2 | 0 | 1 |
| Q5UY99_HALMA     | 0.981  | Hypothetical protein                                                 | <i>rmAC3030</i> | rmAC3030 | 1150 | 1.8  | 1 | 2 | 0.9999 | V | WLASSGHVERPKPVAVTGER        | V | 4 | 2290.1818 | 2291.1709 | 0.989071  | -1.0034 | -6.23  | 2.346 | 0.27  | 0.4 | 1  | 39 | 120 | 2 | 0 | 1 |
| Q5UY99_HALMA     | 0.981  | Hypothetical protein                                                 | <i>rmAC3030</i> | rmAC3030 | 1150 | 1.8  | 1 | 2 | 1      | K | WLASSGHVERPKPVAVTGER        | V | 4 | 2290.1818 | 2290.1816 | -0.000236 | 0       | -0.10  | 3.004 | 0.    |     |    |    |     |   |   |   |

|                   |        |                                                                                               |                 |          |     |      |   |   |        |   |                                   |   |   |           |           |           |         |         |       |       |     |    |    |     |   |   |   |
|-------------------|--------|-----------------------------------------------------------------------------------------------|-----------------|----------|-----|------|---|---|--------|---|-----------------------------------|---|---|-----------|-----------|-----------|---------|---------|-------|-------|-----|----|----|-----|---|---|---|
| RS19_HALMAReview  | 0.9792 | 30S ribosomal protein S19P (HmaS19) (HS18)                                                    | <i>rps19p</i>   | rmAC1607 | 140 | 13.6 | 1 | 2 | 0.9999 | R | VKVEPEMLGHYLFGEQLTR               | S | 4 | 2245.1565 | 2245.1577 | 0.001138  | 0       | 0.51    | 2.959 | 0.226 | 0.1 | 1  | 39 | 108 | 2 | 1 | 1 |
| Q5V5I8_HALMA      | 0.9773 | Na <sup>+</sup> /H <sup>+</sup> antiporter                                                    | <i>nhaC2</i>    | rmAC0143 | 491 | 2.6  | 1 | 2 | 0.9993 | R | AGVLAVLSHHLGR                     | L | 3 | 1328.7677 | 1327.7182 | -1.049553 | 1       | -37.29  | 2.869 | 0.334 | 0   | 1  | 21 | 48  | 2 | 0 | 1 |
| Q5V5I8_HALMA      | 0.9773 | Na <sup>+</sup> /H <sup>+</sup> antiporter                                                    | <i>nhaC2</i>    | rmAC0143 | 491 | 2.6  | 1 | 2 | 0.9998 | R | AGVLAVLSHHLGR                     | L | 3 | 1328.7677 | 1327.7085 | -1.059206 | 1       | -44.56  | 3.266 | 0.348 | 0   | 1  | 27 | 48  | 2 | 0 | 1 |
| Q5V7K2_HALMA      | 0.9773 | Terminal quinol oxidase subunit                                                               | <i>dxdD3</i>    | pNG5047  | 138 | 10.1 | 1 | 2 | 0.9861 | M | AITGAEGVALLIGR                    | I | 2 | 1339.7823 | 1339.7855 | 0.003172  | 0       | 2.37    | 3.592 | 0.163 | 0   | 1  | 21 | 26  | 2 | 0 | 1 |
| Q5UWG6_HALMA      | 0.9718 | High-affinity branched-chain amino acid transport protein                                     | <i>livM-7</i>   | rmB0204  | 435 | 4.4  | 1 | 2 | 0.9995 | K | AIASSVALSQQATREDDNE               | - | 2 | 2003.9396 | 2003.9389 | -0.000685 | 0       | -0.34   | 2.287 | 0.388 | 0   | 1  | 16 | 36  | 2 | 1 | 1 |
| Q5UWG6_HALMA      | 0.9718 | High-affinity branched-chain amino acid transport protein                                     | <i>livM-7</i>   | rmB0204  | 435 | 4.4  | 1 | 2 | 0.9994 | K | AIASSVALSQQATREDDNE               | - | 2 | 2003.9396 | 2004.9454 | 1.005824  | -1.0034 | 1.23    | 3.353 | 0.321 | 0   | 1  | 15 | 36  | 2 | 1 | 1 |
| Q5V1V1_HALMA      | 0.9718 | LPS glycosyltransferase                                                                       | <i>icsA</i>     | rmAC1583 | 380 | 2.9  | 1 | 2 | 0.9169 | K | HGHTWAEFANR                       | V | 3 | 1324.6061 | 1325.6182 | 1.012047  | -1.0034 | 6.57    | 2.305 | 0.09  | 0.7 | 6  | 18 | 40  | 2 | 0 | 1 |
| Q5V1V1_HALMA      | 0.9718 | LPS glycosyltransferase                                                                       | <i>icsA</i>     | rmAC1583 | 380 | 2.9  | 1 | 2 | 0.9995 | K | HGHTWAEFANR                       | V | 3 | 1324.6061 | 1324.5982 | -0.007953 | 0       | -6.00   | 2.501 | 0.238 | 0.5 | 5  | 18 | 40  | 2 | 0 | 1 |
| Q5V3I6_HALMA      | 0.9718 | Putative sugar transporter                                                                    | <i>rmAC0944</i> | rmAC0944 | 449 | 2.4  | 1 | 2 | 0.9946 | G | GVLTFLPELLR                       | V | 2 | 1256.7492 | 1256.7494 | 0.00014   | 0       | 0.11    | 2.107 | 0.187 | 0.1 | 2  | 13 | 20  | 2 | 0 | 1 |
| Q5V3I6_HALMA      | 0.9718 | Putative sugar transporter                                                                    | <i>rmAC0944</i> | rmAC0944 | 449 | 2.4  | 1 | 2 | 0.9995 | R | GVLTFLPELLR                       | G | 2 | 1256.7492 | 1256.7477 | -0.001569 | 0       | -1.25   | 2.381 | 0.254 | 0.1 | 3  | 13 | 20  | 2 | 0 | 1 |
| Q5UX40_HALMA      | 0.9681 | Bacterio-opsin activator-like protein                                                         | <i>boa2</i>     | rmAC3490 | 215 | 5.1  | 1 | 2 | 0.9993 | R | LKELYDGVSLR                       | S | 3 | 1291.7136 | 1291.7145 | 0.000845  | 0       | 0.65    | 3.395 | 0.225 | 0.4 | 32 | 20 | 40  | 2 | 1 | 1 |
| Q5UX40_HALMA      | 0.9681 | Bacterio-opsin activator-like protein                                                         | <i>boa2</i>     | rmAC3490 | 215 | 5.1  | 1 | 2 | 0.9993 | R | LKELYDGVSLR                       | S | 3 | 1291.7136 | 1291.7118 | -0.00181  | 0       | -1.40   | 3.129 | 0.216 | 0.8 | 6  | 23 | 40  | 2 | 1 | 1 |
| Q5V5T9_HALMA      | 0.9663 | ABC transporter permease protein                                                              | <i>yurM</i>     | rmAC0030 | 309 | 2.9  | 1 | 2 | 0.9992 | R | DGGRIDELR                         | S | 2 | 1020.4876 | 1020.4854 | -0.002176 | 0       | -2.13   | 2.361 | 0.179 | 0   | 1  | 14 | 16  | 2 | 0 | 1 |
| Q5V633_HALMA      | 0.9627 | Glycine betaine transporter BetL                                                              | <i>betL1</i>    | pNG7324  | 645 | 2.6  | 1 | 2 | 0.9961 | R | KLPDIQTHHDVDPPEKK                 | - | 4 | 1996.0378 | 1996.0363 | -0.0015   | 0       | -0.75   | 2.602 | 0.16  | 1.2 | 22 | 32 | 96  | 2 | 0 | 1 |
| Q5V633_HALMA      | 0.9627 | Glycine betaine transporter BetL                                                              | <i>betL1</i>    | pNG7324  | 645 | 2.6  | 1 | 2 | 0.999  | R | KLPDIQTHHDVDPPEKK                 | - | 4 | 1996.0378 | 1996.0363 | -0.0015   | 0       | -0.75   | 2.586 | 0.163 | 0.7 | 5  | 35 | 96  | 2 | 0 | 1 |
| Q5V5T8_HALMA      | 0.9624 | Sugar ABC transporter ATP-binding protein (UGPC)                                              | <i>ugpC3</i>    | rmAC0031 | 379 | 8.2  | 2 | 2 | 0.9572 | K | DMGIFELIDR                        | K | 2 | 1207.5907 | 1207.5854 | -0.005276 | 0       | -4.37   | 1.622 | 0.19  | 3.2 | 6  | 11 | 18  | 2 | 0 | 1 |
| Q5V5T8_HALMA      | 0.9624 | Sugar ABC transporter ATP-binding protein (UGPC)                                              | <i>ugpC3</i>    | rmAC0031 | 379 | 8.2  | 2 | 2 | 0.9509 | R | AIVRPDEPVFLMDEPLANLDAK            | L | 3 | 2355.2144 | 2355.2122 | -0.002244 | 0       | -0.95   | 4.479 | 0.376 | 0   | 2  | 35 | 80  | 2 | 1 | 1 |
| Q5V1Z0_HALMA      | 0.9573 | Hypothetical protein                                                                          | <i>rmAC1543</i> | rmAC1543 | 149 | 8.7  | 1 | 2 | 0.9987 | R | IIPHVEHTWQHRS                     | V | 3 | 1638.8379 | 1638.8369 | -0.000988 | 0       | -0.60   | 1.729 | 0.281 | 0.5 | 1  | 23 | 48  | 2 | 0 | 1 |
| Q5V1Z0_HALMA      | 0.9573 | Hypothetical protein                                                                          | <i>rmAC1543</i> | rmAC1543 | 149 | 8.7  | 1 | 2 | 0.9858 | R | IIPHVEHTWQHRS                     | - | 3 | 1638.8379 | 1638.8368 | -0.001171 | 0       | -0.71   | 2.414 | 0.146 | 0.3 | 11 | 21 | 48  | 2 | 0 | 1 |
| Q5V046_HALMA      | 0.9533 | Cobalamin biosynthesis protein CbiM                                                           | <i>cbiM</i>     | rmAC2282 | 212 | 11.3 | 2 | 2 | 0.9911 | R | ARPDLRPNAASEVSA                   | V | 2 | 1552.7957 | 1552.7926 | -0.003148 | 0       | -2.03   | 2.393 | 0.196 | 0.2 | 27 | 11 | 28  | 2 | 0 | 1 |
| Q5V6R4_HALMA      | 0.9284 | Oxidoreductase                                                                                | <i>fabG</i>     | pNG7071  | 309 | 12.3 | 2 | 2 | 0.9555 | K | LANVLFATELAR                      | R | 2 | 1316.7452 | 1318.1054 | 1.360224  | -1.0034 | 271.03  | 2.474 | 0.12  | 0.7 | 6  | 14 | 22  | 2 | 0 | 1 |
| Q5V0H0_HALMA      | 0.9197 | Inosine monophosphate dehydrogenase (EC 1.1.1.205)                                            | <i>imd3</i>     | rmAC2139 | 358 | 7    | 1 | 2 | 0.9965 | R | NELGSVLDLRGDVSDERREEVLSAFR        | V | 4 | 2847.4111 | 2847.4094 | -0.001753 | 0       | -0.62   | 2.926 | 0.147 | 0.5 | 9  | 32 | 144 | 2 | 2 | 1 |
| Q5V0H0_HALMA      | 0.9197 | Inosine monophosphate dehydrogenase (EC 1.1.1.205)                                            | <i>imd3</i>     | rmAC2139 | 358 | 7    | 1 | 2 | 0.9802 | R | NELGSVLDLRGDVSDERREEVLSAFR        | V | 4 | 2847.4111 | 2848.4109 | 0.999771  | -1.0034 | -1.26   | 2.946 | 0.169 | 0.7 | 25 | 31 | 144 | 2 | 2 | 1 |
| Q5V148_HALMA      | 0.9951 | Dolichol-P-glucose synthetase                                                                 | <i>dpg</i>      | rmAC1873 | 605 | 4.5  | 2 | 1 | 1      | K | VDIVRDVFMGSQILR                   | T | 3 | 1803.9665 | 1803.9682 | 0.001647  | 0       | 0.91    | 4.398 | 0.412 | 0   | 1  | 34 | 60  | 2 | 1 | 1 |
| Q5V1W2_HALMA      | 0.9951 | DTDP-glucose-46-dehydratase (EC 4.2.1.46)                                                     | <i>rfbB2</i>    | rmAC1572 | 353 | 5.7  | 2 | 1 | 1      | R | HTVEWYAANKEK                      | W | 3 | 1488.7361 | 1488.7371 | 0.000928  | 0       | 0.62    | 3.749 | 0.327 | 0   | 1  | 22 | 44  | 2 | 1 | 1 |
| Q5V3Y8_HALMA      | 0.9951 | NAD(P)-specific glutamate dehydrogenase (EC 1.4.1.3)                                          | <i>gdhA2</i>    | rmAC0775 | 418 | 9.3  | 2 | 1 | 1      | R | VNDELTITNAFDDLVEYTEETGAPNFR       | T | 3 | 3314.5466 | 3315.5487 | 1.002104  | -1.0034 | -0.38   | 4.629 | 0.388 | 0   | 2  | 26 | 112 | 2 | 0 | 1 |
| Q5V586_HALMA      | 0.9951 | RNA polymerase Rpb4                                                                           | <i>rpB4</i>     | rmAC0259 | 118 | 38.1 | 2 | 1 | 1      | R | FALLDPEESLQLVEELELEKVDTPATYK      | I | 3 | 3347.6912 | 3347.7075 | 0.016317  | 0       | 4.87    | 3.645 | 0.404 | 0   | 1  | 30 | 112 | 2 | 1 | 1 |
| Q5V5X8_HALMA      | 0.9951 | Zinc-binding dehydrogenase (EC 1.1.1.1) (EC 1.6.5.5)                                          | <i>adh3</i>     | rmAC0191 | 355 | 9.6  | 2 | 1 | 1      | R | AELGAVATVNAQOEVDPAK               | A | 2 | 2025.9855 | 2026.9654 | 0.979924  | -1.0034 | -11.56  | 4.789 | 0.482 | 0   | 1  | 20 | 38  | 2 | 0 | 1 |
| RS17_HALMAReview  | 0.9951 | 30S ribosomal protein S17P (HmaS17) (HS14)                                                    | <i>rps17p</i>   | rmAC1603 | 112 | 23.2 | 2 | 1 | 1      | K | SHVVVGVADEQDQGA                   | - | 2 | 1595.7427 | 1595.7412 | -0.001539 | 0       | -0.96   | 4.501 | 0.509 | 0   | 1  | 22 | 30  | 2 | 0 | 1 |
| COBB_HALMAReview  | 0.9951 | Probable cobyrinic acid A.C-diamide synthase                                                  | <i>cobB</i>     | rmAC1102 | 439 | 4.1  | 1 | 1 | 1      | R | HADGIRDALPEDLTYPGR                | I | 3 | 2044.9966 | 2045.0077 | 0.011088  | 0       | 5.42    | 4.552 | 0.324 | 0   | 1  | 26 | 68  | 2 | 1 | 1 |
| FTHS_HALMAReview  | 0.981  | Formate-tetrahydrofolate ligase (EC 6.3.4.3) (Formyltetrahydrofolatesynthetase) (FHS) (FTHFS) | <i>fls</i>      | pNG7380  | 553 | 2.9  | 1 | 1 | 1      | R | KGMMTPNAVVLVASVR                  | A | 3 | 1655.9029 | 1655.9051 | 0.002188  | 0       | 1.32    | 3.086 | 0.295 | 0.1 | 1  | 31 | 60  | 2 | 0 | 1 |
| PFDH_HALMAReview  | 0.981  | Prefoldin beta subunit (GimC beta subunit)                                                    | <i>pfdB</i>     | rmAC1680 | 129 | 15.5 | 1 | 1 | 1      | K | TEFDEAQDLEEKVNLSVR                | V | 3 | 2365.0921 | 2365.0929 | 0.000793  | 0       | 0.34    | 4.048 | 0.47  | 0   | 1  | 32 | 76  | 2 | 1 | 1 |
| PSMA1_HALMAReview | 0.981  | Proteasome alpha subunit (EC 3.4.25.1) (Multicatalytic endopeptidasecomplex alpha subunit)    | <i>psmA1</i>    | rmAC1174 | 260 | 6.5  | 1 | 1 | 1      | K | ADDHIGIASAGHVADAR                 | Q | 3 | 1674.8074 | 1674.8064 | -0.001067 | 0       | -0.64   | 2.853 | 0.399 | 0   | 1  | 25 | 64  | 2 | 0 | 1 |
| Q5UWD2_HALMA      | 0.981  | Aldehyde dehydrogenase (EC 1.2.1.3)                                                           | <i>aldY5</i>    | rmB0246  | 483 | 2.9  | 1 | 1 | 1      | R | AQGEQAIESTYEVK                    | L | 2 | 1551.7416 | 1551.747  | 0.00542   | 0       | 3.49    | 3.234 | 0.386 | 0   | 2  | 14 | 26  | 2 | 0 | 1 |
| Q5UWD9_HALMA      | 0.981  | 3-hydroxyacyl-CoA dehydrogenase (EC 1.1.1.35)                                                 | <i>hbd3</i>     | rmB0238  | 295 | 4.7  | 1 | 1 | 1      | R | DILEEYLRDELGER                    | F | 3 | 1732.8995 | 1732.8993 | -0.00021  | 0       | -0.12   | 3.5   | 0.329 | 0   | 1  | 26 | 52  | 2 | 1 | 1 |
| Q5UWW8_HALMA      | 0.981  | Hypothetical protein                                                                          | <i>rmB0021</i>  | rmB0021  | 156 | 12.8 | 1 | 1 | 1      | V | FYQSPDFDYPTGDTVAAAR               | V | 2 | 2169.0014 | 2171.0454 | 2.044024  | -2.0067 | 17.21   | 5.226 | 0.494 | 0   | 1  | 26 | 38  | 2 | 0 | 1 |
| Q5UWY9_HALMA      | 0.981  | Putative HD family metal dependent phosphohydrolase                                           | <i>rmAC3549</i> | rmAC3549 | 407 | 3.2  | 1 | 1 | 1      | R | VEHSJGVYVHLADR                    | V | 3 | 1542.7579 | 1542.7569 | -0.001005 | 0       | -0.65   | 3.281 | 0.384 | 0   | 1  | 24 | 48  | 2 | 0 | 1 |
| Q5UX08_HALMA      | 0.981  | Hypothetical protein                                                                          | <i>rmAC3528</i> | rmAC3528 | 158 | 13.9 | 1 | 1 | 1      | R | VVFQSDNGDTSATLASASGPNA            | - | 2 | 2107.9658 | 2108.9718 | 1.005952  | -1.0034 | 1.23    | 4.663 | 0.47  | 0   | 1  | 20 | 42  | 2 | 0 | 1 |
| Q5UX16_HALMA      | 0.981  | Dolichol-P-glucose transferase                                                                | <i>dgs</i>      | rmAC3518 | 255 | 5.1  | 1 | 1 | 1      | R | TTDILLLEALLTAR                    | H | 2 | 1414.8031 | 1415.8054 | 1.002324  | -1.0034 | -0.73   | 3.433 | 0.313 | 0   | 1  | 20 | 24  | 2 | 0 | 1 |
| Q5UXG1_HALMA      | 0.981  | NADH oxidase                                                                                  | <i>noxA2</i>    | rmAC3353 | 416 | 5    | 1 | 1 | 1      | M | STSHVIIGDGIAGASAAETIR             | E | 2 | 2025.0491 | 2025.6054 | 0.556324  | -1.0034 | -220.75 | 5.334 | 0.561 | 0   | 1  | 30 | 40  | 2 | 0 | 1 |
| Q5UXT2_HALMA      | 0.981  | Mechanosensitive ion channel                                                                  | <i>mic</i>      | rmAC3218 | 371 | 9.4  | 1 | 1 | 1      | R | VPVGVAYGTIDDKVENILLEAEADLVQDRPNPR | V | 4 | 3847.0003 | 3846.986  | -0.014293 | 0       | -3.72   | 5.276 | 0.537 | 0   | 1  | 48 | 204 | 2 | 1 | 1 |
| Q5UXU5_HALMA      | 0.981  | Halocyanin-like                                                                               | <i>hcp1</i>     | rmAC3204 | 184 | 10.3 | 1 | 1 | 1      | K | STATPEGSWDVTGTGGDDGK              | T | 2 | 1877.7915 | 1877.7884 | -0.003098 | 0       | -1.65   | 4.376 | 0.457 | 0   | 1  | 23 | 36  | 2 | 0 | 1 |
| Q5UXV9_HALMA      | 0.981  | Oligonucleotidase F (EC 3.4.24.-)                                                             | <i>pepF</i>     | rmAC3189 | 596 | 5    | 1 | 1 | 1      | R | EALDGPNVPEVGYDTLVDTHDNLDLHR       | H | 4 | 3316.6211 | 3318.6509 | 2.029771  | -2.0067 | 6.96    | 5.206 | 0.453 | 0   | 1  | 52 | 174 | 2 | 0 | 1 |
| Q5UYA7_HALMA      | 0.981  | Precorin-3 methylase                                                                          | <i>cbiJ</i>     | rmAC3021 | 254 | 3.9  | 1 | 1 | 1      | R | FADLVSVFVR                        | R | 2 | 1167.6288 | 1167.6294 | 0.000544  | 0       | 0.47    | 3.091 | 0.496 | 0   | 1  | 17 | 18  | 2 | 0 | 1 |
| Q5UYM0_HALMA      | 0.981  | Poly(3-hydroxyalkanoate) synthase                                                             | <i>phaC</i>     | rmAC2886 | 475 | 6.3  | 1 | 1 | 1      | R | LHDDAGHSVADLAEYDAADLADIAETTESR    | A | 4 | 3168.4847 | 3168.4829 | -0.001867 | 0       | -0.59   | 4.716 | 0.386 | 0   | 1  | 48 | 174 | 2 | 0 | 1 |
| Q5UYU0_HALMA      | 0.981  | Hypothetical protein                                                                          | <i>rmAC2807</i> | rmAC2807 | 236 | 6.4  | 1 | 1 | 1      | - | MLDDAFGQMVLDFHR                   | G | 3 | 1793.8229 | 1793.8154 | -0.007534 | 0       | -4.20   | 3.308 | 0.304 | 0   | 2  | 24 | 56  | 2 | 0 | 1 |
| Q5UYU7_HALMA      | 0.981  | Flavoprotein                                                                                  | <i>fprA</i>     | rmAC2800 | 232 | 9.1  | 1 | 1 | 1      | R | EHADALDAVVLTHQHGDHVR              | L | 5 | 2347.1417 | 2347.1403 | -0.00144  | 0       | -0.61   | 3.902 | 0.291 | 0.1 | 2  | 46 | 160 | 2 | 0 | 1 |
| Q5UZG4_HALMA      | 0.981  | Hypothetical protein                                                                          | <i>rmAC2538</i> | rmAC2538 | 394 | 10.2 | 2 | 1 | 1      | R | GTESLDGREVYVHVAPK                 | D | 3 | 1969.0269 | 1969.0296 | 0.002639  | 0       | 1.34    | 4.951 | 0.477 | 0   | 1  | 31 | 68  | 2 | 1 | 1 |
| Q5UZJ6_HALMA      | 0.981  | Phenazine biosynthesis-like protein                                                           | <i>phzC</i>     | rmAC2502 | 292 | 9.2  | 1 | 1 | 1      | R | VEQGYEMGRPSLLHLSTDGSGEDISVR       |   |   |           |           |           |         |         |       |       |     |    |    |     |   |   |   |

|                   |        |                                                                                                  |                  |          |      |      |   |   |        |   |                                   |   |   |           |           |           |         |         |       |       |     |    |    |     |   |   |   |  |  |
|-------------------|--------|--------------------------------------------------------------------------------------------------|------------------|----------|------|------|---|---|--------|---|-----------------------------------|---|---|-----------|-----------|-----------|---------|---------|-------|-------|-----|----|----|-----|---|---|---|--|--|
| Q5V2N3_HALMA      | 0.9773 | Hypothetical protein                                                                             | <i>rrmAC1281</i> | rmAC1281 | 863  | 0.8  | 1 | 1 | 0.9998 | R | FVNWILIR                          | N | 2 | 946.5388  | 946.5369  | -0.001924 | 0       | -2.03   | 2.387 | 0.249 | 0.6 | 3  | 11 | 12  | 2 | 0 | 1 |  |  |
| Q5V6H1_HALMA      | 0.9773 | Putative plasmid partitioning protein Soj                                                        | <i>sojA</i>      | pNG7175  | 281  | 7.1  | 1 | 1 | 0.9998 | R | ERDYEIETLEQFEELAAHLR              | Q | 4 | 2490.2027 | 2490.1977 | -0.005023 | 0       | -2.02   | 3.213 | 0.202 | 0.2 | 2  | 32 | 114 | 2 | 1 | 1 |  |  |
| Q5V4I0_HALMA      | 0.9769 | Glycerol-3-phosphate dehydrogenase chain C                                                       | <i>gpdC</i>      | rmAC0556 | 458  | 5.9  | 2 | 1 | 0.9962 | R | GEYVSEQMDKLSVEYIR                 | N | 3 | 2044.9775 | 2045.9782 | 1.000647  | -1.0034 | -1.32   | 2.423 | 0.246 | 0.3 | 1  | 25 | 64  | 2 | 1 | 1 |  |  |
| Q5UXK6_HALMA      | 0.9755 | Anthraniolate phosphoribosyltransferase (EC 2.4.2.18)                                            | <i>trpD1</i>     | rmAC3306 | 361  | 5.3  | 1 | 1 | 0.9997 | R | ILGDPEPHTTLGAFWLANR               | W | 3 | 2125.0592 | 2126.0782 | 1.018947  | -1.0034 | 7.34    | 3.466 | 0.216 | 0   | 1  | 28 | 72  | 2 | 0 | 1 |  |  |
| Q5UXL6_HALMA      | 0.9755 | Hypothetical protein                                                                             | <i>rrmAC3294</i> | rmAC3294 | 135  | 8.1  | 1 | 1 | 0.9997 | R | ERTPFESVLAR                       | A | 3 | 1303.6884 | 1303.6882 | -0.000253 | 0       | -0.19   | 3.163 | 0.266 | 0.1 | 26 | 19 | 40  | 2 | 1 | 1 |  |  |
| Q5UZX3_HALMA      | 0.9755 | Putative heat shock protein                                                                      | <i>hsp20b</i>    | rmAC2361 | 128  | 12.5 | 1 | 1 | 0.9997 | R | DDSDDPDFDEFREIER                  | M | 3 | 2030.8494 | 2030.8493 | -0.000159 | 0       | -0.08   | 2.281 | 0.32  | 0   | 1  | 22 | 60  | 2 | 1 | 1 |  |  |
| Q5V2H7_HALMA      | 0.9755 | Hypothetical protein                                                                             | <i>rrmAC1344</i> | rmAC1344 | 91   | 17.6 | 1 | 1 | 0.9997 | R | VADIAEDLYKKVNELK                  | T | 4 | 1847.004  | 1846.9973 | -0.006762 | 0       | -3.66   | 3.17  | 0.238 | 0.1 | 8  | 29 | 90  | 2 | 1 | 1 |  |  |
| Q5V504_HALMA      | 0.9755 | Putative UbiA prenyltransferase                                                                  | <i>ubiA</i>      | rmAC0351 | 284  | 3.2  | 1 | 1 | 0.9997 | K | DGYVDFHVR                         | G | 2 | 1106.5145 | 1106.5121 | -0.002465 | 0       | -2.23   | 2.317 | 0.232 | 0.1 | 1  | 14 | 16  | 2 | 0 | 1 |  |  |
| Q5V7Q8_HALMA      | 0.9755 | Hypothetical protein                                                                             | <i>pNG5108</i>   | pNG5108  | 614  | 2    | 1 | 1 | 0.9997 | R | AGDIWSTLEILR                      | T | 2 | 1372.735  | 1374.6854 | 1.950424  | -2.0067 | -41.00  | 2.963 | 0.293 | 0.1 | 3  | 15 | 22  | 2 | 0 | 1 |  |  |
| Q5UYE9_HALMA      | 0.9736 | Hypothetical protein                                                                             | <i>rrmAC2971</i> | rmAC2971 | 116  | 18.1 | 1 | 1 | 0.9996 | R | RLEPADGEEQADPEEIRLREK             | G | 4 | 2479.2303 | 2479.2282 | -0.002105 | 0       | -0.85   | 3.363 | 0.156 | 0.8 | 1  | 34 | 120 | 2 | 2 | 1 |  |  |
| Q5V498_HALMA      | 0.9736 | Acyl-coenzyme A synthetases (EC 6.2.1.1)                                                         | <i>acs1</i>      | rmAC0650 | 673  | 2.4  | 1 | 1 | 0.9996 | R | KKGDEWLEGHDLSSLR                  | L | 4 | 1868.9381 | 1868.9338 | -0.004339 | 0       | -2.32   | 4.218 | 0.143 | 0.3 | 1  | 35 | 90  | 2 | 1 | 1 |  |  |
| Q5V639_HALMA      | 0.9736 | Formate dehydrogenase alpha subunit                                                              | <i>fdhG</i>      | pNG7318  | 1103 | 1.4  | 1 | 1 | 0.9996 | R | LFDIADIVSDYRLSK                   | I | 3 | 1753.925  | 1753.9209 | -0.004104 | 0       | -2.34   | 2.809 | 0.252 | 0.1 | 1  | 25 | 56  | 2 | 1 | 1 |  |  |
| Q5UWZ1_HALMA      | 0.9718 | Proteasome-activating nucleotidase 2                                                             | <i>pan2</i>      | rmAC3546 | 404  | 4.7  | 1 | 1 | 0.9995 | R | TMMQLSEMDGDFDRGRDIR               | I | 3 | 2228.9864 | 2229.2034 | 0.216967  | 0       | 97.34   | 2.988 | 0.25  | 0   | 1  | 29 | 72  | 2 | 1 | 1 |  |  |
| Q5UZ10_HALMA      | 0.9718 | Putative HAMP and MCP domain signal transducer                                                   | <i>htr</i>       | rmAC2728 | 784  | 2.2  | 1 | 1 | 0.9995 | R | IATAYNDLLDEWEDTIR                 | E | 3 | 2036.9691 | 2037.9682 | 0.999047  | -1.0034 | -2.11   | 2.973 | 0.228 | 1.1 | 5  | 24 | 64  | 2 | 0 | 1 |  |  |
| Q5V0T2_HALMA      | 0.9718 | Hypothetical protein                                                                             | <i>rrmAC2010</i> | rmAC2010 | 260  | 7.7  | 1 | 1 | 0.9995 | D | PSTRYNVATGEDVVTIDQSN              | - | 2 | 2165.0236 | 2165.0323 | 0.008699  | 0       | 4.02    | 3.939 | 0.421 | 0   | 1  | 20 | 38  | 1 | 1 | 1 |  |  |
| Q5V2Q1_HALMA      | 0.9681 | Medium-chain-fatty-acid-CoA ligase                                                               | <i>alkK2</i>     | rmAC1259 | 550  | 2.9  | 1 | 1 | 0.9993 | R | THEGIVRHIDYAEYAEAR                | T | 3 | 1944.9078 | 1944.9019 | -0.005886 | 0       | -3.03   | 2.801 | 0.242 | 0   | 1  | 23 | 60  | 2 | 1 | 1 |  |  |
| Q5UXV8_HALMA      | 0.9663 | Proteasome-activating nucleotidase 1                                                             | <i>pan1</i>      | rmAC3190 | 406  | 6.2  | 1 | 1 | 0.9992 | R | DLFELAAERPAIFIDEIDAIAAK           | R | 3 | 2772.4585 | 2773.465  | 1.006463  | -1.0034 | 1.12    | 2.954 | 0.289 | 0.1 | 2  | 22 | 96  | 2 | 1 | 1 |  |  |
| Q5UZ11_HALMA      | 0.9663 | Aminopeptidase                                                                                   | <i>pepB3</i>     | rmAC2726 | 363  | 8.5  | 1 | 1 | 0.9992 | K | NLPGGEVFTAPVDSVEGEVDFDKPLYHQGR    | E | 4 | 3366.6884 | 3367.6909 | 1.002471  | -1.0034 | -0.26   | 2.38  | 0.28  | 0.2 | 14 | 36 | 180 | 2 | 0 | 1 |  |  |
| Q5V2F2_HALMA      | 0.9645 | Thioredoxin                                                                                      | <i>trx4</i>      | rmAC1371 | 154  | 17.5 | 1 | 1 | 0.9991 | R | IMPNGTDVSVESVEGYIGRDELLATLEK      | R | 3 | 2949.4641 | 2951.4682 | 2.004047  | -2.0067 | -0.90   | 3.352 | 0.228 | 1.1 | 2  | 25 | 104 | 2 | 1 | 1 |  |  |
| Q5V3X6_HALMA      | 0.9609 | Sensor protein (EC 2.7.13.3)                                                                     | <i>rrmAC0789</i> | rmAC0789 | 576  | 2.4  | 1 | 1 | 0.9989 | R | AEVSAVLDLSALR                     | N | 3 | 1457.7725 | 1458.7582 | 0.985647  | -1.0034 | -12.14  | 2.813 | 0.224 | 0.7 | 20 | 21 | 52  | 2 | 0 | 1 |  |  |
| Q5V5E6_HALMA      | 0.9591 | Multidrug resistance protein-like                                                                | <i>yfmO2</i>     | rmAC0194 | 435  | 1.8  | 1 | 1 | 0.9988 | R | VLTTLAFAR                         | M | 2 | 889.5385  | 889.5382  | -0.000342 | 0       | -0.38   | 1.928 | 0.235 | 0.4 | 1  | 11 | 14  | 2 | 0 | 1 |  |  |
| Q5V4A4_HALMA      | 0.9556 | Branched-chain amino acid ABC transporter ATP-binding protein                                    | <i>livF-3</i>    | rmAC0641 | 245  | 9.4  | 1 | 1 | 0.9986 | D | BCTDEDVAVIESVYDVLTELDERR          | D | 3 | 2650.261  | 2651.2582 | 0.997147  | -1.0034 | -2.34   | 3.554 | 0.137 | 0.2 | 1  | 32 | 88  | 2 | 0 | 1 |  |  |
| Q5V0X4_HALMA      | 0.952  | Glucosylase                                                                                      | <i>cga-1</i>     | rmAC1961 | 1513 | 0.8  | 1 | 1 | 0.9984 | R | NIDGGFLELVR                       | L | 2 | 1344.7401 | 1345.3654 | 0.625324  | -1.0034 | -281.11 | 2.176 | 0.226 | 0.3 | 1  | 15 | 22  | 2 | 0 | 1 |  |  |
| Q5V3D3_HALMA      | 0.9503 | Hypothetical protein                                                                             | <i>rrmAC1003</i> | rmAC1003 | 382  | 3.4  | 1 | 1 | 0.9983 | F | AFVPPFMLLGGALR                    | T | 2 | 1390.7795 | 1390.7789 | -0.000619 | 0       | -0.45   | 2.665 | 0.359 | 0   | 1  | 18 | 24  | 1 | 0 | 1 |  |  |
| Q5V0V1_HALMA      | 0.9485 | ABC transporter substrate-binding protein                                                        | <i>anf</i>       | rmAC1987 | 456  | 2.9  | 1 | 1 | 0.9982 | R | FFAHNNGPMAAR                      | W | 3 | 1387.6819 | 1388.6482 | 0.966247  | -1.0034 | -26.74  | 2.894 | 0.164 | 0.5 | 4  | 23 | 48  | 2 | 0 | 1 |  |  |
| Q5V2C6_HALMA      | 0.9468 | Putative DNA binding                                                                             | <i>rrmAC1397</i> | rmAC1397 | 103  | 16.5 | 1 | 1 | 0.9981 | R | GLAHPNLDDEEVEAFR                  | V | 3 | 1939.8912 | 1938.8853 | -1.005948 | 1       | -3.07   | 3.788 | 0.253 | 0   | 1  | 28 | 64  | 2 | 0 | 1 |  |  |
| Q5V406_HALMA      | 0.945  | TRK potassium uptake system protein                                                              | <i>trkH3</i>     | rmAC0755 | 564  | 1.4  | 1 | 1 | 0.998  | R | GIWQFSR                           | V | 2 | 1005.5396 | 1005.8454 | 0.305824  | 0       | 304.14  | 2.145 | 0.175 | 0.2 | 1  | 12 | 14  | 2 | 0 | 1 |  |  |
| Q5V4H5_HALMA      | 0.945  | Phosphoenolpyruvate carboxylase (EC 4.1.1.31)                                                    | <i>pepC</i>      | rmAC0562 | 898  | 3.1  | 1 | 1 | 0.998  | R | GADPEEFQVLEDVLIQPTFTAHTPEAR       | R | 4 | 3138.5146 | 3139.5309 | 1.016271  | -1.0034 | 4.12    | 4.029 | 0.188 | 0   | 6  | 36 | 162 | 2 | 0 | 1 |  |  |
| Q5V5P1_HALMA      | 0.945  | Hypothetical protein                                                                             | <i>rrmAC0082</i> | rmAC0082 | 421  | 3.8  | 1 | 1 | 0.998  | R | FDAVDPIDIAIEGHFK                  | W | 3 | 1735.8781 | 1735.8799 | 0.00178   | 0       | 1.03    | 2.958 | 0.143 | 0.1 | 1  | 26 | 60  | 2 | 0 | 1 |  |  |
| Q5UX24_HALMA      | 0.933  | Hypothetical protein                                                                             | <i>rrmAC3510</i> | rmAC3510 | 252  | 6.3  | 1 | 1 | 0.9973 | K | LAAEHLLEELSELVR                   | R | 3 | 1849.9785 | 1849.9582 | -0.020353 | 0       | -11.00  | 2.921 | 0.189 | 0.3 | 20 | 17 | 60  | 2 | 0 | 1 |  |  |
| Q5V6K3_HALMA      | 0.933  | Universal stress protein                                                                         | <i>usp13</i>     | pNG7139  | 300  | 4    | 1 | 1 | 0.9973 | R | YLAGSVTESVVR                      | H | 2 | 1279.6772 | 1279.8054 | 0.128224  | 0       | 100.20  | 2.353 | 0.206 | 0.1 | 4  | 14 | 22  | 2 | 0 | 1 |  |  |
| Q5UWZ7_HALMA      | 0.9323 | Hypothetical protein                                                                             | <i>rrmAC3541</i> | rmAC3541 | 409  | 6.8  | 2 | 1 | 0.9864 | R | AATVTITLVDSR                      | L | 2 | 1144.6452 | 1144.6454 | 0.000224  | 0       | 0.20    | 2.302 | 0.121 | 0.4 | 4  | 15 | 20  | 2 | 0 | 1 |  |  |
| Q5UX97_HALMA      | 0.9314 | Terminal quinol oxidase subunit                                                                  | <i>dxdD2</i>     | rmAC3427 | 128  | 25   | 1 | 1 | 0.9972 | R | VSYGTAVTFLAVVPTPTMHDFWNADPDDQSGER | H | 4 | 3433.5885 | 3434.5847 | 0.99614   | -1.0034 | -2.10   | 3.783 | 0.151 | 0.9 | 3  | 41 | 186 | 2 | 0 | 1 |  |  |
| Q5V4V8_HALMA      | 0.8474 | LemA protein                                                                                     | <i>lemA</i>      | rmAC0409 | 193  | 13.5 | 2 | 2 | 0.9543 | K | FDDVRDALETIEQR                    | L | 3 | 1705.8271 | 1705.8204 | -0.006729 | 0       | -3.94   | 2.751 | 0.13  | 0.6 | 18 | 20 | 52  | 2 | 1 | 1 |  |  |
| Q5UX02_HALMA      | 0.83   | Hypothetical protein                                                                             | <i>rrmAC3534</i> | rmAC3534 | 181  | 12.2 | 2 | 2 | 0.9439 | K | NGVTAVLAAAYR                      | G | 2 | 1133.6193 | 1134.6028 | 0.983433  | -1.0034 | -17.57  | 2.281 | 0.009 | 0   | 1  | 17 | 20  | 2 | 0 | 1 |  |  |
| Q5UYG0_HALMA      | 0.8594 | Hypothetical protein                                                                             | <i>rrmAC2960</i> | rmAC2960 | 125  | 40   | 2 | 1 | 0.9687 | R | AGVQALVDLRTDR                     | T | 3 | 1541.8161 | 1541.8095 | -0.006593 | 0       | -4.28   | 2.175 | 0.178 | 1.4 | 4  | 20 | 52  | 2 | 1 | 1 |  |  |
| Q5UY10_HALMA      | 0.8726 | Hypothetical protein                                                                             | <i>rrmAC2938</i> | rmAC2938 | 129  | 8.5  | 1 | 2 | 0.9935 | R | LHLGENTIQFR                       | R | 3 | 1326.7044 | 1326.7026 | -0.001796 | 0       | -1.35   | 2.312 | 0.173 | 0.3 | 8  | 16 | 40  | 2 | 0 | 1 |  |  |
| Q5UZG6_HALMA      | 0.3285 | Hypothetical protein                                                                             | <i>rrmAC2536</i> | rmAC2536 | 281  | 4.6  | 1 | 2 | 0.9053 | R | VHLPGHGSALLQR                     | A | 3 | 1373.8143 | 1373.8123 | -0.002047 | 0       | -1.49   | 2.052 | 0.074 | 1   | 3  | 19 | 48  | 2 | 0 | 1 |  |  |
| PSMA2_HALMAReview | 0.8971 | Proteasome alpha subunit (EC 3.4.25.1) (Multicatalytic endopeptidasecomplex alpha subunit)       | <i>psmA2</i>     | rmAC1773 | 244  | 8.2  | 1 | 1 | 0.9951 | K | IHEIDSHVGVASAGHVADAR              | Q | 4 | 2040.0137 | 2040.0103 | -0.003401 | 0       | -1.67   | 2.725 | 0.059 | 0.7 | 2  | 36 | 114 | 2 | 0 | 1 |  |  |
| Q5V0L4_HALMA      | 0.8786 | Hypothetical protein                                                                             | <i>rrmAC2086</i> | rmAC2086 | 139  | 5    | 1 | 1 | 0.9939 | R | FGLRPLV                           | - | 2 | 800.4908  | 800.4914  | 0.000605  | 0       | 0.76    | 2.067 | 0.148 | 0.3 | 3  | 10 | 12  | 2 | 0 | 1 |  |  |
| Q5UWS9_HALMA      | 0.8696 | Hypothetical protein                                                                             | <i>rmB0067</i>   | rmB0067  | 768  | 2.2  | 1 | 1 | 0.9933 | R | TDFDFHDFSDHHSYLER                 | N | 4 | 2166.9031 | 2166.9047 | 0.001608  | 0       | 0.74    | 2.367 | 0.188 | 0.6 | 78 | 24 | 96  | 2 | 0 | 1 |  |  |
| Q5V3I0_HALMA      | 0.8681 | Dolichyl-phosphate-mannose-protein mannosyltransferase                                           | <i>dpm6</i>      | rmAC0939 | 595  | 4.5  | 1 | 1 | 0.9932 | R | IVAEGFERPPNFPQRPPTPGSFTDLRL       | L | 4 | 3039.593  | 3040.6109 | 1.017871  | -1.0034 | 4.78    | 2.278 | 0.113 | 0.4 | 2  | 38 | 156 | 2 | 0 | 1 |  |  |
| Q5UWG0_HALMA      | 0.8637 | UDP-glucose 4-epimerase                                                                          | <i>galE10</i>    | rmB0210  | 319  | 4.7  | 1 | 1 | 0.9929 | R | RGDVSEATDVHIAVK                   | E | 3 | 1595.8267 | 1596.8482 | 1.021447  | -1.0034 | 11.34   | 3.205 | 0.098 | 0.2 | 1  | 25 | 56  | 2 | 0 | 1 |  |  |
| Q5V4X2_HALMA      | 0.8579 | Nitrous-oxide reductase (EC 1.7.9.9.6)                                                           | <i>nosZ</i>      | rmAC0390 | 659  | 3.3  | 1 | 1 | 0.9925 | K | KYVDKDDYEETIYTEEDSGVER            | T | 3 | 2682.182  | 2683.101  | 0.91895   | -1.0034 | -31.47  | 3.425 | 0.162 | 0.3 | 6  | 25 | 84  | 2 | 1 | 1 |  |  |
| SYS_HALMAReview   | 0.8451 | Seryl-tRNA synthetase (EC 6.1.1.11) (Seryl-tRNA(Ser/Sec) synthetase)(Serine-tRNA ligase) (SerRS) | <i>serS</i>      | rmAC2808 | 460  | 7    | 1 | 1 | 0.9916 | R | YREGFDDLRLDLPDEVVPHYDLGEDLLDLDFER | G | 4 | 3864.8119 | 3866.6909 | 1.878971  | -2.0067 | -33.05  | 2.959 | 0.115 | 7.4 | 2  | 36 | 186 | 2 | 2 | 1 |  |  |
| Q5V2T7_HALMA      | 0.8409 | Hypothetical protein                                                                             | <i>rrmAC1221</i> | rmAC1221 | 317  | 7.9  | 1 | 1 | 0.9913 | - | MDKPDTNIGENGGEPPESERAQAR          | E | 4 | 2726.2202 | 2726.2172 | -0.002992 | 0       | -1.10   | 3.136 | 0.1   | 2.6 | 8  | 39 | 144 | 2 | 1 | 1 |  |  |
| Q5V3S1_HALMA      | 0.8299 | Hypothetical protein                                                                             | <i>rrmAC0850</i> | rmAC0850 | 349  | 3.4  | 1 | 1 | 0.9905 | R | D                                 |   |   |           |           |           |         |         |       |       |     |    |    |     |   |   |   |  |  |

|            |        |  |  |  |     |     |  |     |     |      |   |   |        |   |                                     |   |   |           |           |           |         |         |       |       |     |     |    |     |   |   |   |              |  |
|------------|--------|--|--|--|-----|-----|--|-----|-----|------|---|---|--------|---|-------------------------------------|---|---|-----------|-----------|-----------|---------|---------|-------|-------|-----|-----|----|-----|---|---|---|--------------|--|
| DECOY_327  | 0.5088 |  |  |  | 927 | 927 |  | 927 | 927 | 3.8  | 1 | 1 | 0.9534 | R | RLVYHLIGGHEIYTVAAPTGVQATVPFEVTSGDAR | E | 3 | 3723.9373 | 3723.7461 | -0.191209 | 0       | -51.35  | 2.735 | 0.098 | 6   | 10  | 23 | 136 | 2 | 0 | 1 |              |  |
| DECOY_275  | 0.4761 |  |  |  | 170 | 170 |  | 170 | 170 | 6.5  | 1 | 1 | 0.9471 | R | DDL PQNAPVSR                        | R | 2 | 1210.5942 | 1211.5054 | 0.911224  | -1.0034 | -76.10  | 2.233 | 0.132 | 8.6 | 59  | 12 | 20  | 2 | 0 | 2 | DECOY_4059 ; |  |
| DECOY_839  | 0.3442 |  |  |  | 403 | 403 |  | 403 | 403 | 3.2  | 1 | 1 | 0.9112 | R | RVLPDVNSGEAIR                       | R | 3 | 1424.7736 | 1425.6082 | 0.834547  | -1.0034 | -118.48 | 2.362 | 0.023 | 4.8 | 1   | 21 | 48  | 2 | 0 | 1 |              |  |
| DECOY_2196 | 0.3255 |  |  |  | 141 | 141 |  | 141 | 141 | 12.8 | 1 | 1 | 0.9041 | R | VTFLFTGDDPVEDLAVIR                  | S | 3 | 2006.036  | 2007.0682 | 1.032147  | -1.0034 | 14.36   | 2.478 | 0.165 | 5.8 | 293 | 19 | 68  | 2 | 0 | 1 |              |  |

<sup>a</sup> NA: Protein without unique peptide identification.

<sup>b</sup> Mass difference: Indicates the deviations between the calculated neutral peptide mass and precursor neutral mass (derived from the measured m/z).

<sup>c</sup> Mass difference adjustment: An adjustment of "-1.00335" and "-2.0067" was applied when the precursor mass was presumably assigned to the +1 and +2 respectively, isotopic peak and "+1" and "+2" for precursor mass with a putative "-1" and "-2" dalton shift.
