# Supplementary material
Source: PubMed Central journal article supplement (PMC3168985)
Supplement: NIHMS304204-supplement-6_si_006.pdf [file NIHMS304204-supplement-6_si_006.pdf]

**Supplementary Table 6. Number of predicted and MS/MS identified proteins encoded by the nine replicons in *H. marismortui* .**

| <b>Replicons</b>    | <b>No. predicted</b> | <b>No. of detected proteins<br/>(<math>\geq 2</math> unique peptide)</b> | <b>Detection rate (%)</b> | <b>No of detected protein<br/>(<math>\geq 1</math> unique peptide)</b> | <b>Detection rate (%)</b> |
|---------------------|----------------------|--------------------------------------------------------------------------|---------------------------|------------------------------------------------------------------------|---------------------------|
| <b>Chromosome I</b> | 3137                 | 1114                                                                     | 35.5                      | 1502                                                                   | 47.9                      |
| <b>Chromosome</b>   | 282                  | 72                                                                       | 25.5                      | 107                                                                    | 37.9                      |
| <b>pNG700</b>       | 363                  | 68                                                                       | 18.7                      | 102                                                                    | 28.1                      |
| <b>pNG600</b>       | 166                  | 23                                                                       | 13.9                      | 35                                                                     | 21.1                      |
| <b>pNG500</b>       | 134                  | 13                                                                       | 9.7                       | 19                                                                     | 14.2                      |
| <b>pNG400</b>       | 54                   | 9                                                                        | 16.7                      | 10                                                                     | 18.5                      |
| <b>pNG300</b>       | 40                   | 2                                                                        | 5                         | 4                                                                      | 10                        |
| <b>pNG200</b>       | 42                   | 5                                                                        | 11.9                      | 8                                                                      | 19                        |
| <b>pNG100</b>       | 36                   | 4                                                                        | 11.1                      | 8                                                                      | 22.2                      |
| <b>Total</b>        | <b>4254</b>          | <b>1310</b>                                                              | <b>30.8</b>               | <b>1795</b>                                                            | <b>42.2</b>               |
