# Supplementary material
Source: PubMed Central journal article supplement (PMC3168985)
Supplement: NIHMS304204-supplement-7_si_007.pdf [file NIHMS304204-supplement-7_si_007.pdf]

**Supplementary Table 7.** List of 441 proteins with peptides exclusively or predominantly found in the membrane samples by MS/MS.

| Locus name | Accession no.    | Gene name        | Protein description                                                                        | Total no. peptides | No. peptides (membrane) | No. peptides (soluble) | % membrane / total | TMHMM |
|------------|------------------|------------------|--------------------------------------------------------------------------------------------|--------------------|-------------------------|------------------------|--------------------|-------|
| rrnAC3155  | Q5UXZ2_HALMA     | <i>atpC1</i>     | H <sup>+</sup> ATP synthase sununit C (EC 3.6.3.14)                                        | 1811               | 1811                    | 0                      | 100.00             | 2     |
| rrnAC2228  | Q5V092_HALMA     | <i>dppD</i>      | Dipeptide ABC transporter ATP-binding                                                      | 943                | 943                     | 0                      | 100.00             | 0     |
| rrnB0319   | Q5UW70_HALMA     | <i>phnD1</i>     | ABC transporter phosphate-binding protein                                                  | 323                | 323                     | 0                      | 100.00             | 0     |
| rrnAC2656  | Q5UZ68_HALMA     | <i>yufN</i>      | ABC transporter                                                                            | 252                | 252                     | 0                      | 100.00             | 0     |
| rrnAC2605  | Q5UZA8_HALMA     | <i>hdrD</i>      | Heterodisulfide reductase                                                                  | 241                | 241                     | 0                      | 100.00             | 4     |
| rrnAC1154  | Q5V2Z7_HALMA     | <i>coxA3</i>     | Cytochrome c oxidase polypeptide I (EC 1.9.3.1)                                            | 150                | 150                     | 0                      | 100.00             | 13    |
| rrnAC1611  | RL3_HALMAReview  | <i>rpl3p</i>     | 50S ribosomal protein L3P (Hmal3) (H11)                                                    | 148                | 148                     | 0                      | 100.00             | 0     |
| pNG7145    | Q5V6J8_HALMA     | <i>nosL</i>      | NosL protein                                                                               | 141                | 141                     | 0                      | 100.00             | 0     |
| rrnAC0923  | Q5V3K5_HALMA     | <i>rbsB-2</i>    | Sugar ABC transporter substrate binding protein                                            | 136                | 136                     | 0                      | 100.00             | 1     |
| rrnAC0732  | Q5V427_HALMA     | <i>petB1</i>     | Cytochrome b6                                                                              | 132                | 132                     | 0                      | 100.00             | 5     |
| rrnAC0759  | Q5V402_HALMA     | <i>cat</i>       | Cationic amino acid transporter                                                            | 127                | 127                     | 0                      | 100.00             | 12    |
| rrnAC1570  | Q5V1W4_HALMA     | <i>trp-7</i>     | ABC transporter ATP-binding protein                                                        | 123                | 123                     | 0                      | 100.00             | 4     |
| rrnAC1153  | Q5V2Z8_HALMA     | <i>coxB2</i>     | Cytochrome c oxidase subunit II (EC 1.9.3.1)                                               | 114                | 114                     | 0                      | 100.00             | 1     |
| rrnAC1589  | SECY_HALMAReview | <i>secY</i>      | Preprotein translocase subunit SecY (Protein transport protein SEC61subunit alpha homolog) | 113                | 113                     | 0                      | 100.00             | 9     |
| rrnAC1455  | Q5V271_HALMA     | <i>nuoL2</i>     | NADH dehydrogenase I L subunit                                                             | 107                | 107                     | 0                      | 100.00             | 16    |
| rrnAC3215  | Q5UXT5_HALMA     | <i>secD</i>      | Protein-export membrane protein SecD                                                       | 106                | 106                     | 0                      | 100.00             | 6     |
| rrnAC3297  | Q5UXL3_HALMA     | <i>oppC</i>      | Oligopeptide ABC transporter permease protein                                              | 104                | 104                     | 0                      | 100.00             | 8     |
| rrnAC0731  | Q5V428_HALMA     | <i>rrnAC0731</i> | Cytochrome b(C-terminal)/b6                                                                | 101                | 101                     | 0                      | 100.00             | 4     |
| rrnAC0371  | Q5V4Y8_HALMA     | <i>htr</i>       | MCP domain signal transducer                                                               | 100                | 100                     | 0                      | 100.00             | 2     |
| rrnAC3154  | Q5UXZ3_HALMA     | <i>atpI</i>      | V-type ATP synthase subunit I (EC 3.6.3.14)                                                | 98                 | 98                      | 0                      | 100.00             | 7     |
| rrnAC1507  | Q5V224_HALMA     | <i>pstA2</i>     | Phosphate ABC transporter permease protein                                                 | 96                 | 96                      | 0                      | 100.00             | 14    |
| rrnAC0431  | Q5V4T7_HALMA     | <i>tot</i>       | Transmembrane oligosaccharyl transferase                                                   | 90                 | 90                      | 0                      | 100.00             | 13    |
| rrnAC1812  | Q5V1A2_HALMA     | <i>pnm</i>       | N-methyltransferase-like                                                                   | 88                 | 88                      | 0                      | 100.00             | 0     |
| rrnAC3161  | Q5UXY6_HALMA     | <i>bop</i>       | Bacteriorhodopsin                                                                          | 87                 | 87                      | 0                      | 100.00             | 7     |
| rrnAC2229  | Q5V091_HALMA     | <i>dppB1</i>     | Dipeptide ABC transporter permease                                                         | 85                 | 85                      | 0                      | 100.00             | 6     |
| rrnAC3295  | Q5UXL5_HALMA     | <i>ykfD</i>      | Oligopeptide ABC transporter ATP-binding                                                   | 85                 | 85                      | 0                      | 100.00             | 0     |
| rrnAC3467  | Q5UX61_HALMA     | <i>pspA1</i>     | Transcription regulator                                                                    | 85                 | 85                      | 0                      | 100.00             | 0     |
| rrnAC0358  | Q5V4Z8_HALMA     | <i>imp-1</i>     | Immunogenic protein                                                                        | 79                 | 79                      | 0                      | 100.00             | 0     |
| rrnB0207   | Q5UWG3_HALMA     | <i>rrnB0207</i>  | Putative extracellular ligand binding protein                                              | 78                 | 78                      | 0                      | 100.00             | 0     |
| rrnAC3053  | Q5UY81_HALMA     | <i>rrnAC3053</i> | ABC transporter ATP-binding protein                                                        | 74                 | 74                      | 0                      | 100.00             | 0     |
| rrnAC0381  | Q5V4X9_HALMA     | <i>glnH1</i>     | Glutamine ABC transporter permease protein                                                 | 74                 | 74                      | 0                      | 100.00             | 0     |
| rrnAC0906  | Q5V3M0_HALMA     | <i>ibp</i>       | Iron-binding protein                                                                       | 74                 | 74                      | 0                      | 100.00             | 0     |
| rrnAC3296  | Q5UXL4_HALMA     | <i>oppD2</i>     | Oligopeptide ABC transporter ATPase component                                              | 71                 | 71                      | 0                      | 100.00             | 0     |
| pNG7110    | Q5V6N0_HALMA     | <i>pNG7110</i>   | Putative permease                                                                          | 70                 | 70                      | 0                      | 100.00             | 4     |

|           |                   |                  |                                                                                                                                 |    |    |   |        |    |
|-----------|-------------------|------------------|---------------------------------------------------------------------------------------------------------------------------------|----|----|---|--------|----|
| rrnAC2590 | Q5UZC2_HALMA      | <i>cstA</i>      | Carbon starvation protein CstA                                                                                                  | 66 | 66 | 0 | 100.00 | 13 |
| rrnAC1152 | Q5V2Z9_HALMA      | <i>hcp5</i>      | Halocyanin-like                                                                                                                 | 65 | 65 | 0 | 100.00 | 2  |
| rrnAC1347 | Q5V2H4_HALMA      | <i>rrnAC1347</i> | Putative mechanosensitive ion channel                                                                                           | 62 | 62 | 0 | 100.00 | 3  |
| rrnAC3267 | Q5UXP0_HALMA      | <i>rrnAC3267</i> | Molybdate transport protein                                                                                                     | 58 | 58 | 0 | 100.00 | 0  |
| pNG7149   | Q5V6J5_HALMA      | <i>drrA-2</i>    | ABC transporter ATP-binding protein                                                                                             | 57 | 57 | 0 | 100.00 | 0  |
| rrnAC0502 | Q5V4M8_HALMA      | <i>ycdH</i>      | Adhesion protein                                                                                                                | 57 | 57 | 0 | 100.00 | 0  |
| rrnAC1372 | Q5V2F1_HALMA      | <i>ccpA</i>      | Cytochrome c551 peroxidase                                                                                                      | 57 | 57 | 0 | 100.00 | 2  |
| rrnAC0229 | Q5V5B4_HALMA      | <i>nhaC1</i>     | Na <sup>+</sup> /H <sup>+</sup> antiporter                                                                                      | 56 | 56 | 0 | 100.00 | 11 |
| rrnAC1278 | Q5V2N6_HALMA      | <i>coxA1</i>     | Cytochrome c oxidase polypeptide I (EC 1.9.3.1)                                                                                 | 55 | 55 | 0 | 100.00 | 13 |
| rrnAC1458 | Q5V269_HALMA      | <i>ndhG3</i>     | NADH dehydrogenase/oxidoreductase                                                                                               | 55 | 55 | 0 | 100.00 | 13 |
| rrnAC2147 | Q5V0G2_HALMA      | <i>pstA1</i>     | Phosphate ABC transporter permease protein                                                                                      | 53 | 53 | 0 | 100.00 | 24 |
| rrnAC1432 | Q5V293_HALMA      | <i>dpm5</i>      | Dolichyl-phosphate-mannose-protein<br>mannosyltransferase (EC 2.4.1.-)(EC 2.4.1.109)                                            | 52 | 52 | 0 | 100.00 | 10 |
| rrnAC0630 | Q5V4B4_HALMA      | <i>sppA</i>      | Putative signal peptide peptidase SppA (EC 3.4.21.-)                                                                            | 52 | 52 | 0 | 100.00 | 1  |
| pNG7150   | Q5V6J4_HALMA      | <i>nosD1</i>     | Copper-binding protein                                                                                                          | 51 | 51 | 0 | 100.00 | 1  |
| rrnAC1448 | Q5V278_HALMA      | <i>nuoB</i>      | NADH dehydrogenase I B subunit                                                                                                  | 51 | 51 | 0 | 100.00 | 0  |
| rrnAC0043 | Q5V5S7_HALMA      | <i>coxB1</i>     | Cytochrome c oxidase polypeptide II (EC 1.9.3.1)                                                                                | 49 | 49 | 0 | 100.00 | 3  |
| pNG7017   | Q5V6W1_HALMA      | <i>pNG7017</i>   | 4Fe-S protein                                                                                                                   | 48 | 48 | 0 | 100.00 | 0  |
| rrnAC2969 | PYRD_HALMAReview  | <i>pyrD</i>      | Dihydroorotate dehydrogenase (EC 1.3.3.1)<br>(Dihydroorotate oxidase) (DHodehase) (DHODase)<br>(DHOD)                           | 47 | 47 | 0 | 100.00 | 0  |
| rrnAC1450 | Q5V276_HALMA      | <i>ndhG4</i>     | NADH dehydrogenase/oxidoreductase                                                                                               | 47 | 47 | 0 | 100.00 | 9  |
| rrnAC3424 | Q5UX99_HALMA      | <i>rrnAC3424</i> | Rieske [2Fe-2S] domain protein                                                                                                  | 44 | 44 | 0 | 100.00 | 0  |
| rrnAC2811 | Q5UYT6_HALMA      | <i>mthK</i>      | Potassium channel related protein                                                                                               | 42 | 42 | 0 | 100.00 | 4  |
| rrnAC3052 | Q5UY82_HALMA      | <i>nosY2</i>     | ABC-type transport system involved in multi-copper<br>enzyme maturationpermease component                                       | 41 | 41 | 0 | 100.00 | 6  |
| rrnAC0677 | Q5V473_HALMA      | <i>yusZ4</i>     | Short-chain dehydrogenase/oxidoreductase                                                                                        | 40 | 40 | 0 | 100.00 | 0  |
| rrnAC0252 | Q5V593_HALMA      | <i>abcS-2</i>    | ABC transporter permease protein                                                                                                | 39 | 39 | 0 | 100.00 | 4  |
| rrnAC3344 | Q5UXG9_HALMA      | <i>htlB</i>      | HTR-like protein                                                                                                                | 39 | 39 | 0 | 100.00 | 4  |
| rrnAC1456 | Q5V270_HALMA      | <i>ndhD</i>      | NADH dehydrogenase subunit 4                                                                                                    | 39 | 39 | 0 | 100.00 | 14 |
| rrnAC3298 | Q5UXL2_HALMA      | <i>dppB</i>      | Dipeptide ABC transporter permease                                                                                              | 38 | 38 | 0 | 100.00 | 6  |
| rrnAC2146 | PSTB2_HALMAReview | <i>pstB2</i>     | Phosphate import ATP-binding protein PstB 2 (EC<br>3.6.3.27) (Phosphate-transporting ATPase 2) (ABC<br>phosphate transporter 2) | 37 | 37 | 0 | 100.00 | 0  |
| rrnAC3530 | Q5UX06_HALMA      | <i>nuoL1</i>     | NADH dehydrogenase I L subunit                                                                                                  | 36 | 36 | 0 | 100.00 | 12 |
| rrnAC0991 | Q5V3E3_HALMA      | <i>htlD</i>      | Sensor protein (EC 2.7.13.3)                                                                                                    | 36 | 36 | 0 | 100.00 | 5  |
| pNG6056   | Q5V6Y2_HALMA      | <i>copA2</i>     | Copper-transporting ATPase CopA                                                                                                 | 35 | 35 | 0 | 100.00 | 8  |
| rrnAC3531 | Q5UX05_HALMA      | <i>ndhG2</i>     | NADH dehydrogenase/oxidoreductase                                                                                               | 34 | 34 | 0 | 100.00 | 13 |
| rrnAC1509 | Q5V222_HALMA      | <i>phoX</i>      | Phosphate ABC transporter phosphate-binding                                                                                     | 34 | 34 | 0 | 100.00 | 0  |
| rrnAC1750 | Q5V1F3_HALMA      | <i>argT</i>      | Amino acid ABC transporter amino acid-binding                                                                                   | 33 | 33 | 0 | 100.00 | 0  |

|           |                   |                  |                                                                     |    |    |   |        |    |
|-----------|-------------------|------------------|---------------------------------------------------------------------|----|----|---|--------|----|
| rrnAC2230 | Q5V090_HALMA      | <i>oppC1</i>     | Oligopeptide transport system permease protein                      | 33 | 33 | 0 | 100.00 | 6  |
| rrnAC2245 | Q5V077_HALMA      | <i>rrnAC2245</i> | M50 family metallopeptidase                                         | 32 | 32 | 0 | 100.00 | 3  |
| rrnAC1028 | Q5V3A9_HALMA      | <i>lolC</i>      | Putative permease                                                   | 32 | 32 | 0 | 100.00 | 8  |
| rrnAC1656 | Q5V1N3_HALMA      | <i>rrnAC1656</i> | Nitrite/nitrate reduction protein                                   | 31 | 31 | 0 | 100.00 | 6  |
| rrnAC3197 | Q5UXV2_HALMA      | <i>malE2</i>     | Trehalose/maltose binding protein                                   | 31 | 31 | 0 | 100.00 | 0  |
| pNG5003   | Q5V7G2_HALMA      | <i>yvrO-1</i>    | ABC transporter ATP-binding protein                                 | 29 | 29 | 0 | 100.00 | 0  |
| rrnAC2580 | Q5UZD0_HALMA      | <i>imp</i>       | Immunogenic protein                                                 | 28 | 28 | 0 | 100.00 | 0  |
| rrnAC2782 | Q5UYW3_HALMA      | <i>rbn</i>       | Ribonuclease BN                                                     | 28 | 28 | 0 | 100.00 | 8  |
| rrnAC0147 | Q5V5I5_HALMA      | <i>tppA</i>      | Thiamine-binding periplasmic protein-like                           | 28 | 28 | 0 | 100.00 | 0  |
| rrnAC2065 | RL15E_HALMAReview | <i>rpl15e</i>    | 50S ribosomal protein L15e (50S ribosomal protein                   | 27 | 27 | 0 | 100.00 | 0  |
| rrnAC1145 | Q5V305_HALMA      | <i>blp</i>       | Bacterio-opsin linked product                                       | 27 | 27 | 0 | 100.00 | 0  |
| rrnAC2030 | Q5V0R5_HALMA      | <i>xop1</i>      | Bacteriorhodopsin                                                   | 27 | 27 | 0 | 100.00 | 7  |
| rrnAC1149 | Q5V302_HALMA      | <i>ctpB</i>      | Cation transporting ATPase                                          | 27 | 27 | 0 | 100.00 | 7  |
| rrnAC0524 | Q5V4K8_HALMA      | <i>rrnAC0524</i> | Putative sec-independent translocation prot                         | 27 | 27 | 0 | 100.00 | 1  |
| rrnAC2721 | Q5UZ15_HALMA      | <i>cat</i>       | Cation efflux protein                                               | 26 | 26 | 0 | 100.00 | 5  |
| rrnAC0419 | Q5V4U8_HALMA      | <i>gtl</i>       | Glycosyl transferase-like                                           | 26 | 26 | 0 | 100.00 | 2  |
| rrnAC3537 | Q5UWZ9_HALMA      | <i>nmhE</i>      | Na/H antiporter subunit                                             | 26 | 26 | 0 | 100.00 | 2  |
| pNG7088   | Q5V6P9_HALMA      | <i>qad</i>       | Quinohemoprotein alcohol dehydrogenase (EC                          | 26 | 26 | 0 | 100.00 | 0  |
| rrnAC1017 | Q5V3C0_HALMA      | <i>lpg2</i>      | LPS glycosyltransferase                                             | 25 | 25 | 0 | 100.00 | 0  |
| rrnB0321  | Q5UW68_HALMA      | <i>phnE</i>      | Phosphonates ABC transporter permease protein                       | 25 | 25 | 0 | 100.00 | 5  |
| rrnAC1430 | Q5V295_HALMA      | <i>fbr2</i>      | Cytochrome-like protein                                             | 24 | 24 | 0 | 100.00 | 0  |
| rrnAC2906 | Q5UYK5_HALMA      | <i>htpX1</i>     | Probable protease htpX-like (EC 3.4.24.-)                           | 24 | 24 | 0 | 100.00 | 4  |
| rrnAC2047 | Q5V0P9_HALMA      | <i>sppA</i>      | Protease IV-like (EC 3.4.21.-)                                      | 24 | 24 | 0 | 100.00 | 1  |
| rrnAC0436 | Q5V4T2_HALMA      | <i>traB</i>      | Putative plasmid transfer protein                                   | 24 | 24 | 0 | 100.00 | 6  |
| rrnAC1856 | Q5V162_HALMA      | <i>rrnAC1856</i> | Putative RNA binding protein                                        | 24 | 24 | 0 | 100.00 | 1  |
| rrnAC0733 | Q5V426_HALMA      | <i>rrnAC0733</i> | Rieske [2Fe-2S] domain protein                                      | 24 | 24 | 0 | 100.00 | 0  |
| rrnB0315  | Q5UW74_HALMA      | <i>msmX-3</i>    | Sugar ABC transporter ATP-binding protein                           | 24 | 24 | 0 | 100.00 | 0  |
| rrnAC3132 | Q5UY13_HALMA      | <i>livK-2</i>    | Branched-chain amino acid ABC transporter amino acid-bindingprotein | 23 | 23 | 0 | 100.00 | 0  |
| rrnAC2776 | Q5UYW8_HALMA      | <i>matE2</i>     | Multi antimicrobial extrusion drug/sodium                           | 23 | 23 | 0 | 100.00 | 10 |
| rrnAC1451 | Q5V275_HALMA      | <i>nolD</i>      | NADH dehydrogenase/oxidoreductase-like protein                      | 23 | 23 | 0 | 100.00 | 0  |
| rrnB0156  | Q5UWK8_HALMA      | <i>rrnB0156</i>  | Sensor protein (EC 2.7.13.3)                                        | 23 | 23 | 0 | 100.00 | 2  |
| rrnB0314  | Q5UW75_HALMA      | <i>ugpE</i>      | Sn-glycerol-3-phosphate transport system permease                   | 23 | 23 | 0 | 100.00 | 6  |
| rrnAC1925 | Q5V106_HALMA      | <i>mhpC</i>      | 2-hydroxy-6-ketonona-24-dienedioic acid hydrolase (EC 3.7.1.-)      | 22 | 22 | 0 | 100.00 | 0  |
| rrnAC2710 | Q5UZ25_HALMA      | <i>gbp3</i>      | GTP-binding proteinlike                                             | 22 | 22 | 0 | 100.00 | 0  |
| rrnAC3170 | Q5UXX7_HALMA      | <i>rrnAC3170</i> | M50 metallopeptidase                                                | 22 | 22 | 0 | 100.00 | 7  |
| rrnAC2349 | Q5UZY4_HALMA      | <i>malE1</i>     | Maltose ABC transporter maltose-binding protein                     | 22 | 22 | 0 | 100.00 | 0  |

|           |                   |                  |                                                                                                                           |    |    |   |        |    |
|-----------|-------------------|------------------|---------------------------------------------------------------------------------------------------------------------------|----|----|---|--------|----|
| rrnAC1505 | PSTB1_HALMAReview | <i>pstB1</i>     | Phosphate import ATP-binding protein pstB 1 (EC 3.6.3.27) (Phosphate-transporting ATPase 1) (ABC phosphate transporter 1) | 22 | 22 | 0 | 100.00 | 0  |
| rrnAC2334 | Q5UZZ6_HALMA      | <i>glcD2</i>     | Putative oxidoreductase                                                                                                   | 22 | 22 | 0 | 100.00 | 0  |
| rrnAC2357 | RL10_HALMAReview  | <i>rpl10e</i>    | 50S ribosomal protein L10e                                                                                                | 21 | 21 | 0 | 100.00 | 0  |
| pNG6079   | Q5V738_HALMA      | <i>czcD</i>      | Cation efflux system protein                                                                                              | 21 | 21 | 0 | 100.00 | 6  |
| rrnAC0700 | SECE_HALMAReview  | <i>secE</i>      | Preprotein translocase subunit secE (Protein transport protein SEC61gamma subunit homolog)                                | 21 | 21 | 0 | 100.00 | 1  |
| rrnAC1350 | Q5V2H1_HALMA      | <i>gr-4</i>      | Putative sugar transferase                                                                                                | 21 | 21 | 0 | 100.00 | 0  |
| rrnAC2179 | Q5V0D2_HALMA      | <i>fer2</i>      | 2Fe-2S iron-sulfur cluster binding domain                                                                                 | 20 | 20 | 0 | 100.00 | 0  |
| pNG7253   | Q5V698_HALMA      | <i>rbsC-1</i>    | Sugar ABC transporter permease protein                                                                                    | 20 | 20 | 0 | 100.00 | 8  |
| rrnAC0251 | Q5V594_HALMA      | <i>yvrO-2</i>    | ABC transporter ATP-binding protein                                                                                       | 19 | 19 | 0 | 100.00 | 0  |
| rrnAC0566 | Q5V4H2_HALMA      | <i>livK-1</i>    | Branched chain amino acid ABC transporter branched chain amino acid-binding protein                                       | 19 | 19 | 0 | 100.00 | 0  |
| rrnB0175  | Q5UWJ2_HALMA      | <i>imd2</i>      | Inosine monophosphate dehydrogenase (EC                                                                                   | 19 | 19 | 0 | 100.00 | 3  |
| rrnAC2073 | Q5V0M6_HALMA      | <i>trp2</i>      | ABC transporter ATP-binding protein                                                                                       | 18 | 18 | 0 | 100.00 | 0  |
| rrnAC1655 | Q5V1N4_HALMA      | <i>nosF-2</i>    | ABC transporter ATP-binding protein                                                                                       | 18 | 18 | 0 | 100.00 | 0  |
| rrnAC3129 | Q5UY15_HALMA      | <i>livM-6</i>    | Branched-chain amino acid ABC transporter permease protein                                                                | 18 | 18 | 0 | 100.00 | 9  |
| rrnAC0380 | Q5V4Y0_HALMA      | <i>glnP</i>      | Glutamine-binding periplasmic protein of glutamine ABCtransporter                                                         | 18 | 18 | 0 | 100.00 | 4  |
| rrnAC0370 | Q5V4Y9_HALMA      | <i>lbp</i>       | Leucine-binding protein                                                                                                   | 18 | 18 | 0 | 100.00 | 0  |
| pNG7169   | Q5V6H7_HALMA      | <i>nhaC4</i>     | Na <sup>+</sup> /H <sup>+</sup> antiporter                                                                                | 18 | 18 | 0 | 100.00 | 9  |
| rrnAC3529 | Q5UX07_HALMA      | <i>rrnAC3529</i> | NADH-ubiquinone/plastoquinone                                                                                             | 18 | 18 | 0 | 100.00 | 16 |
| rrnAC3214 | Q5UXT6_HALMA      | <i>secF</i>      | Protein-export membrane protein SecF                                                                                      | 18 | 18 | 0 | 100.00 | 6  |
| pNG5001   | Q5V7G3_HALMA      | <i>abcP-1</i>    | ABC transporter permease protein                                                                                          | 17 | 17 | 0 | 100.00 | 4  |
| rrnAC1370 | Q5V2F3_HALMA      | <i>ccmF</i>      | Cytochrome c-type biogenesis protein CcmF                                                                                 | 17 | 17 | 0 | 100.00 | 15 |
| rrnAC2111 | SECG_HALMAReview  | <i>secG</i>      | Preprotein translocase secG subunit (Protein transport protein SEC61subunit beta homolog)                                 | 17 | 17 | 0 | 100.00 | 1  |
| rrnB0083  | Q5UWR4_HALMA      | <i>ski-1</i>     | Putative 2-component system sensor kinase                                                                                 | 17 | 17 | 0 | 100.00 | 4  |
| rrnAC0430 | Q5V4T8_HALMA      | <i>exoM</i>      | Succinoglycan biosynthesis protein                                                                                        | 17 | 17 | 0 | 100.00 | 1  |
| rrnAC1760 | Q5V1E4_HALMA      | <i>rrnAC1760</i> | Transporter possibly hexose                                                                                               | 17 | 17 | 0 | 100.00 | 11 |
| rrnAC0359 | Q5V4Z7_HALMA      | <i>rrnAC0359</i> | 4-hydroxybenzoate 3-monooxygenase (EC                                                                                     | 16 | 16 | 0 | 100.00 | 0  |
| rrnAC1745 | Q5V1F6_HALMA      | <i>yckA-2</i>    | Amino acid ABC transporter permease protein                                                                               | 16 | 16 | 0 | 100.00 | 5  |
| rrnAC1892 | Q5V133_HALMA      | <i>rrnAC1892</i> | DSBA-like thioredoxin domain                                                                                              | 16 | 16 | 0 | 100.00 | 0  |
| rrnAC0180 | Q5V5F8_HALMA      | <i>nhaC5</i>     | Na <sup>+</sup> /H <sup>+</sup> antiporter                                                                                | 16 | 16 | 0 | 100.00 | 13 |
| rrnAC1114 | Q5V331_HALMA      | <i>htlD</i>      | Sensor protein (EC 2.7.13.3)                                                                                              | 16 | 16 | 0 | 100.00 | 6  |
| rrnAC2712 | Q5UZ23_HALMA      | <i>sec11a</i>    | Signal sequence peptidase                                                                                                 | 16 | 16 | 0 | 100.00 | 1  |
| rrnAC0010 | Q5V5V7_HALMA      | <i>nac</i>       | Sodium-and chloride-dependent transporter                                                                                 | 16 | 16 | 0 | 100.00 | 11 |

|           |                  |                  |                                                               |    |    |   |        |    |
|-----------|------------------|------------------|---------------------------------------------------------------|----|----|---|--------|----|
| rrnAC0827 | Q5V3U2_HALMA     | <i>livG-4</i>    | Branched-chain amino acid ABC transporter ATP-binding protein | 15 | 15 | 0 | 100.00 | 0  |
| rrnAC0825 | Q5V3U3_HALMA     | <i>livM</i>      | High-affinity branched-chain amino acid transport protein     | 15 | 15 | 0 | 100.00 | 8  |
| rrnAC1019 | Q5V3B8_HALMA     | <i>dpm1</i>      | Dolichyl-phosphate beta-D-mannosyltransferase                 | 14 | 14 | 0 | 100.00 | 2  |
| rrnAC3304 | Q5UXK7_HALMA     | <i>yfhM</i>      | Epoxide hydrolase-related protein                             | 14 | 14 | 0 | 100.00 | 0  |
| rrnAC0429 | Q5V4T9_HALMA     | <i>lpg3</i>      | LPS glycosyltransferase                                       | 14 | 14 | 0 | 100.00 | 0  |
| rrnB0322  | Q5UW67_HALMA     | <i>phnD2</i>     | Phosphonates ABC transporter permease protein                 | 14 | 14 | 0 | 100.00 | 5  |
| rrnAC2723 | Q5UZ13_HALMA     | <i>rrnAC2723</i> | Putative bacterial regulatory protein arsR family             | 14 | 14 | 0 | 100.00 | 2  |
| rrnAC1818 | Q5V196_HALMA     | <i>rrnAC1818</i> | Putative hydrolase                                            | 14 | 14 | 0 | 100.00 | 0  |
| pNG6023   | Q5V6Z0_HALMA     | <i>pNG6023</i>   | Putative metal ion permease                                   | 14 | 14 | 0 | 100.00 | 8  |
| pNG6081   | Q5V741_HALMA     | <i>zntA1</i>     | Zinc-transporting ATPase                                      | 14 | 14 | 0 | 100.00 | 6  |
| rrnAC0706 | Q5V451_HALMA     | <i>nce1</i>      | Na <sup>+</sup> /Ca <sup>2+</sup> -exchanging protein         | 13 | 13 | 0 | 100.00 | 12 |
| rrnAC2069 | Q5V0N0_HALMA     | <i>crtB</i>      | Phytoene synthase (EC 2.5.1.32) (EC 2.5.1.21)                 | 13 | 13 | 0 | 100.00 | 0  |
| pNG7161   | Q5V6I3_HALMA     | <i>mntH</i>      | Putative Mn transporter                                       | 13 | 13 | 0 | 100.00 | 11 |
| rrnAC0187 | Q5V5F2_HALMA     | <i>rrnAC0187</i> | Putative transporter                                          | 13 | 13 | 0 | 100.00 | 6  |
| rrnAC3112 | RL39_HALMAReview | <i>rpl39e</i>    | 50S ribosomal protein L39e (HI39e) (HI46e)                    | 12 | 12 | 0 | 100.00 | 0  |
| rrnAC3127 | Q5UY17_HALMA     | <i>livF-7</i>    | Branched-chain amino acid ABC transporter ATP-binding protein | 12 | 12 | 0 | 100.00 | 0  |
| pNG6046   | Q5V7E1_HALMA     | <i>copA3</i>     | Copper-transporting ATPase (EC 3.6.3.4)                       | 12 | 12 | 0 | 100.00 | 8  |
| rrnAC2882 | Q5UYM4_HALMA     | <i>maoC1</i>     | MaoC family protein                                           | 12 | 12 | 0 | 100.00 | 0  |
| rrnAC2148 | Q5V0G1_HALMA     | <i>pstC2</i>     | Phosphate ABC transporter permease protein                    | 12 | 12 | 0 | 100.00 | 8  |
| rrnAC3128 | Q5UY16_HALMA     | <i>livG-9</i>    | Branched-chain amino acid ABC transporter ATP-binding protein | 11 | 11 | 0 | 100.00 | 0  |
| rrnAC0357 | Q5V4Z9_HALMA     | <i>dcuC</i>      | C4-dicarboxylate anaerobic carrier                            | 11 | 11 | 0 | 100.00 | 15 |
| pNG1026   | Q5V881_HALMA     | <i>flaA2</i>     | Flagellin A protein                                           | 11 | 11 | 0 | 100.00 | 1  |
| rrnAC1029 | Q5V3A8_HALMA     | <i>rrnAC1029</i> | ABC transporter ATP-binding protein                           | 10 | 10 | 0 | 100.00 | 0  |
| rrnAC0665 | Q5V483_HALMA     | <i>abcP-2</i>    | ABC transporter permease protein                              | 10 | 10 | 0 | 100.00 | 4  |
| rrnAC2465 | Q5UZN1_HALMA     | <i>livG-6</i>    | Branched-chain amino acid ABC transporter ATP-binding protein | 10 | 10 | 0 | 100.00 | 0  |
| rrnAC1747 | Q5V1F5_HALMA     | <i>glnQ1</i>     | Glutamine ABC transporter ATP-binding protein                 | 10 | 10 | 0 | 100.00 | 0  |
| rrnAC0320 | Q5V532_HALMA     | <i>ubiA</i>      | Prenyltransferase                                             | 10 | 10 | 0 | 100.00 | 7  |
| pNG7023   | Q5V6V6_HALMA     | <i>rbsB-1</i>    | Putative ABC transporter substrate-binding protein            | 10 | 10 | 0 | 100.00 | 0  |
| rrnAC0296 | Q5V551_HALMA     | <i>htrA1</i>     | Serine protease HtrA                                          | 10 | 10 | 0 | 100.00 | 0  |
| rrnB0312  | Q5UW76_HALMA     | <i>ugpA</i>      | ABC transporter permease protein                              | 9  | 9  | 0 | 100.00 | 6  |
| rrnAC0647 | Q5V4A0_HALMA     | <i>abcS-1</i>    | ABC transporter substrate-binding protein                     | 9  | 9  | 0 | 100.00 | 0  |
| rrnAC1378 | Q5V2E5_HALMA     | <i>pan1a</i>     | Membrane protein Pan1                                         | 9  | 9  | 0 | 100.00 | 0  |
| rrnAC3265 | Q5UXP2_HALMA     | <i>pstB3</i>     | Phosphate ABC transporter ATP-binding protein                 | 9  | 9  | 0 | 100.00 | 0  |
| rrnB0103  | Q5UWP8_HALMA     | <i>rbsB-3</i>    | Putative ABC transporter substrate binding protein            | 9  | 9  | 0 | 100.00 | 0  |

|           |              |                  |                                                             |   |   |   |        |    |
|-----------|--------------|------------------|-------------------------------------------------------------|---|---|---|--------|----|
| pNG7346   | Q5V612_HALMA | <i>potD1</i>     | Spermidine/putrescine transporter substrate binding protein | 9 | 9 | 0 | 100.00 | 0  |
| rrnAC2759 | Q5UYU1_HALMA | <i>nso</i>       | Transporter sodium/sulfate symporter family                 | 9 | 9 | 0 | 100.00 | 12 |
| rrnAC0377 | Q5V4Y2_HALMA | <i>yckA-1</i>    | Amino acid ABC transporter permease protein                 | 8 | 8 | 0 | 100.00 | 6  |
| rrnAC3266 | Q5UXP1_HALMA | <i>modB</i>      | Molybdenum ABC transporter permease protein                 | 8 | 8 | 0 | 100.00 | 4  |
| rrnAC2886 | Q5UYM0_HALMA | <i>phaC</i>      | Poly(3-hydroxyalkanoate) synthase                           | 8 | 8 | 0 | 100.00 | 0  |
| rrnAC0920 | Q5V3K8_HALMA | <i>msmX-2</i>    | Sugar ABC transporter ATP-binding protein                   | 8 | 8 | 0 | 100.00 | 0  |
| rrnB0270  | Q5UWB2_HALMA | <i>zntA2</i>     | Zinc-transporting ATPase                                    | 8 | 8 | 0 | 100.00 | 5  |
| rrnAC1368 | Q5V2F5_HALMA | <i>trp-6</i>     | ABC transporter ATP-binding protein                         | 7 | 7 | 0 | 100.00 | 0  |
| rrnAC2468 | Q5UZM9_HALMA | <i>livH-6</i>    | Branched chain amino acid transporter permease              | 7 | 7 | 0 | 100.00 | 8  |
| rrnAC2280 | Q5V048_HALMA | <i>cbiQ1</i>     | Cobalt transport protein                                    | 7 | 7 | 0 | 100.00 | 5  |
| rrnAC2178 | Q5V0D3_HALMA | <i>rfbB3</i>     | DTDP-glucose-46-dehydratase (EC 4.2.1.46)                   | 7 | 7 | 0 | 100.00 | 0  |
| rrnB0204  | Q5UWG6_HALMA | <i>livM-7</i>    | High-affinity branched-chain amino acid transport protein   | 7 | 7 | 0 | 100.00 | 8  |
| rrnAC2034 | Q5V0R2_HALMA | <i>htlA</i>      | HTR-like protein                                            | 7 | 7 | 0 | 100.00 | 8  |
| pNG7084   | Q5V6Q3_HALMA | <i>htr8</i>      | MCP domain signal transducer                                | 7 | 7 | 0 | 100.00 | 5  |
| rrnAC2039 | Q5V0Q7_HALMA | <i>oppA</i>      | Oligopeptide ABC transporter solute-binding protein         | 7 | 7 | 0 | 100.00 | 0  |
| pNG7284   | Q5V671_HALMA | <i>glcD3</i>     | Putative oxidoreductase                                     | 7 | 7 | 0 | 100.00 | 0  |
| rrnAC2412 | Q5UZS8_HALMA | <i>rrnAC2412</i> | Putative peptidase                                          | 7 | 7 | 0 | 100.00 | 4  |
| pNG7288   | Q5V667_HALMA | <i>pNG7288</i>   | Putative phosphoesterase                                    | 7 | 7 | 0 | 100.00 | 2  |
| rrnAC0944 | Q5V3I6_HALMA | <i>rrnAC0944</i> | Putative sugar transporter                                  | 7 | 7 | 0 | 100.00 | 10 |
| rrnAC2084 | Q5V0L6_HALMA | <i>nosF-3</i>    | ABC transporter ATP-binding protein                         | 6 | 6 | 0 | 100.00 | 0  |
| rrnAC0555 | Q5V4I1_HALMA | <i>gpdB</i>      | Glycerol-3-phosphate dehydrogenase chain B                  | 6 | 6 | 0 | 100.00 | 0  |
| pNG7375   | Q5V5Y7_HALMA | <i>betL2</i>     | Glycine betaine transporter                                 | 6 | 6 | 0 | 100.00 | 12 |
| pNG6143   | Q5V782_HALMA | <i>mrr</i>       | Mrr restriction system protein-like                         | 6 | 6 | 0 | 100.00 | 1  |
| rrnAC2023 | Q5V0S1_HALMA | <i>nuoC</i>      | NADH dehydrogenase I chain C D                              | 6 | 6 | 0 | 100.00 | 0  |
| pNG7291   | Q5V665_HALMA | <i>htpX2</i>     | Probable protease HtpX-like (EC 3.4.24.-)                   | 6 | 6 | 0 | 100.00 | 4  |
| rrnAC1624 | Q5V1R3_HALMA | <i>soxA3</i>     | Probable sulfite oxidase                                    | 6 | 6 | 0 | 100.00 | 5  |
| rrnAC1397 | Q5V2C6_HALMA | <i>rrnAC1397</i> | Putative DNA binding                                        | 6 | 6 | 0 | 100.00 | 1  |
| pNG7252   | Q5V699_HALMA | <i>rhsA</i>      | Ribose ABC transporter ATP-binding                          | 6 | 6 | 0 | 100.00 | 0  |
| rrnAC2858 | Q5UYU5_HALMA | <i>tatC2</i>     | Sec-independent protein translocase TatC                    | 6 | 6 | 0 | 100.00 | 10 |
| rrnAC2527 | Q5UZH3_HALMA | <i>ylnA</i>      | Anion permease                                              | 5 | 5 | 0 | 100.00 | 10 |
| rrnAC2466 | Q5UZN0_HALMA | <i>livM-5</i>    | Branched-chain amino acid ABC transporter permease protein  | 5 | 5 | 0 | 100.00 | 8  |
| rrnAC1910 | Q5V119_HALMA | <i>fbr1</i>      | Cytochrome-like protein Fbr                                 | 5 | 5 | 0 | 100.00 | 0  |
| rrnAC1873 | Q5V148_HALMA | <i>dpg</i>       | Dolichol-P-glucose synthetase                               | 5 | 5 | 0 | 100.00 | 7  |
| rrnAC0939 | Q5V3J0_HALMA | <i>dpm6</i>      | Dolichyl-phosphate-mannose-protein mannosyltransferase      | 5 | 5 | 0 | 100.00 | 10 |
| rrnAC1749 | Q5V1F4_HALMA | <i>glnH2</i>     | Glutamine ABC transporter permease protein                  | 5 | 5 | 0 | 100.00 | 3  |
| rrnAC1769 | Q5V1D8_HALMA | <i>putP-2</i>    | Sodium-solute symporter putative                            | 5 | 5 | 0 | 100.00 | 13 |

|           |              |                  |                                                                               |      |      |     |        |    |
|-----------|--------------|------------------|-------------------------------------------------------------------------------|------|------|-----|--------|----|
| pNG7363   | Q5V5Z7_HALMA | <i>metF</i>      | 5,10-methylenetetrahydrofolate reductase (EC                                  | 4    | 4    | 0   | 100.00 | 0  |
| rrnAC0048 | Q5V5S2_HALMA | <i>rrnAC0048</i> | ABC transporter ATP-binding protein                                           | 4    | 4    | 0   | 100.00 | 0  |
| rrnAC3312 | Q5UXK0_HALMA | <i>cyp1</i>      | Cytochrome P450 (EC 1.14.14.1) (EC 1.6.2.4)                                   | 4    | 4    | 0   | 100.00 | 0  |
| pNG6070   | Q5V731_HALMA | <i>trx</i>       | DSBA-like thioredoxin                                                         | 4    | 4    | 0   | 100.00 | 0  |
| rrnAC0179 | Q5V5F9_HALMA | <i>rfbU</i>      | LPS biosynthesis protein                                                      | 4    | 4    | 0   | 100.00 | 0  |
| pNG7340   | Q5V618_HALMA | <i>pNG7340</i>   | Putative extracellular solute binding protein                                 | 4    | 4    | 0   | 100.00 | 0  |
| rrnAC3549 | Q5UWY9_HALMA | <i>rrnAC3549</i> | Putative HD family metal dependent                                            | 4    | 4    | 0   | 100.00 | 0  |
| rrnAC2836 | Q5UYR4_HALMA | <i>dld</i>       | Sugar and other transporter                                                   | 4    | 4    | 0   | 100.00 | 12 |
| rrnAC3427 | Q5UX97_HALMA | <i>doxD2</i>     | Terminal quinol oxidase subunit                                               | 4    | 4    | 0   | 100.00 | 0  |
| rrnAC2314 | Q5V015_HALMA | <i>trp3</i>      | ABC transport protein                                                         | 3    | 3    | 0   | 100.00 | 5  |
| rrnB0225  | Q5UWE9_HALMA | <i>livG-10</i>   | Branched-chain amino acid ABC transporter ATP-binding protein                 | 3    | 3    | 0   | 100.00 | 0  |
| rrnAC0554 | Q5V4I2_HALMA | <i>gpdA</i>      | Glycerol-3-phosphate dehydrogenase (EC 1.1.99.5)                              | 3    | 3    | 0   | 100.00 | 0  |
| rrnAC1967 | Q5V0W8_HALMA | <i>glcD1</i>     | Glycolate oxidase subunit GlcD                                                | 3    | 3    | 0   | 100.00 | 0  |
| rrnAC1015 | Q5V3C2_HALMA | <i>gtr-7</i>     | Glycosyltransferase (EC 2.4.1.-)                                              | 3    | 3    | 0   | 100.00 | 0  |
| rrnAC1296 | Q5V2M0_HALMA | <i>corA</i>      | Magnesium Mg(2+)/cobalt Co(2+) transport protein                              | 3    | 3    | 0   | 100.00 | 2  |
| rrnAC0321 | Q5V531_HALMA | <i>crtI2</i>     | Phytoene dehydrogenase (EC 1.3.99.-)                                          | 3    | 3    | 0   | 100.00 | 0  |
| rrnB0041  | Q5UWV1_HALMA | <i>xseA2</i>     | Probable exodeoxyribonuclease VII large subunit (EC 3.1.11.6)                 | 3    | 3    | 0   | 100.00 | 1  |
| rrnAC0789 | Q5V3X6_HALMA | <i>rrnAC0789</i> | Sensor protein (EC 2.7.13.3)                                                  | 3    | 3    | 0   | 100.00 | 6  |
| rrnAC3226 | Q5UXS5_HALMA | <i>ssf</i>       | Sodium/solute symporter                                                       | 3    | 3    | 0   | 100.00 | 12 |
| rrnAC0755 | Q5V406_HALMA | <i>trkH3</i>     | TRK potassium uptake system protein                                           | 3    | 3    | 0   | 100.00 | 10 |
| rrnAC0532 | Q5V4K1_HALMA | <i>pgsA</i>      | CDP-diacylglycerol-glycerol-3-phosphate 3-phosphatidyltransferase(EC 2.7.8.5) | 2    | 2    | 0   | 100.00 | 3  |
| rrnAC2850 | Q5UYQ2_HALMA | <i>pcbD-1</i>    | Hydrolase alpha/beta hydrolase fold family                                    | 2    | 2    | 0   | 100.00 | 0  |
| rrnAC2139 | Q5V0H0_HALMA | <i>imd3</i>      | Inosine monophosphate dehydrogenase (EC                                       | 2    | 2    | 0   | 100.00 | 3  |
| rrnAC0409 | Q5V4V8_HALMA | <i>lemA</i>      | LemA protein                                                                  | 2    | 2    | 0   | 100.00 | 1  |
| pNG6094   | Q5V755_HALMA | <i>xseA1</i>     | Probable exodeoxyribonuclease VII large subunit (EC 3.1.11.6)                 | 2    | 2    | 0   | 100.00 | 1  |
| rrnAC2244 | Q5V078_HALMA | <i>rrnAC2244</i> | Putative ZIP domain zinc transporter                                          | 2    | 2    | 0   | 100.00 | 7  |
| pNG7073   | Q5V6R2_HALMA | <i>qgd</i>       | Quinoprotein glucose dehydrogenase (EC 1.1.5.2)                               | 2    | 2    | 0   | 100.00 | 0  |
| rrnAC3482 | Q5UX47_HALMA | <i>ark-6</i>     | Sensor protein (EC 2.7.13.3)                                                  | 2    | 2    | 0   | 100.00 | 6  |
| rrnAC2868 | Q5UYN5_HALMA | <i>potD2</i>     | Spermidine/putrescine ABC transporter spermidine/putrescine bindingprotein    | 2    | 2    | 0   | 100.00 | 1  |
| rrnAC0029 | Q5V5U0_HALMA | <i>rrnAC0029</i> | Sugar ABC transporter permease protein                                        | 2    | 2    | 0   | 100.00 | 6  |
| rrnAC1860 | Q5V159_HALMA | <i>rrnAC1860</i> | Sugar transporter                                                             | 2    | 2    | 0   | 100.00 | 10 |
| rrnAC2359 | Q5UZX5_HALMA | <i>usp16</i>     | Universal stress protein                                                      | 2    | 2    | 0   | 100.00 | 0  |
| pNG5138   | Q5V7F4_HALMA | <i>csg1</i>      | Cell surface glycoprotein                                                     | 4176 | 4021 | 155 | 96.29  | 2  |
| rrnAC3099 | Q5UY42_HALMA | <i>edp</i>       | Proteinase IV-like                                                            | 1854 | 1852 | 2   | 99.89  | 1  |
| rrnAC2149 | Q5V0G0_HALMA | <i>yggG</i>      | Phosphate ABC transporter binding                                             | 805  | 802  | 3   | 99.63  | 0  |

|           |                   |                  |                                                                  |     |     |   |        |   |
|-----------|-------------------|------------------|------------------------------------------------------------------|-----|-----|---|--------|---|
| rrnAC3299 | Q5UXL1_HALMA      | <i>dppA</i>      | Dipeptide ABC transporter dipeptide-binding                      | 792 | 791 | 1 | 99.87  | 0 |
| rrnAC0510 | Q5V4M1_HALMA      | <i>hcp9</i>      | Halocyanin-like                                                  | 754 | 752 | 2 | 99.73  | 0 |
| rrnAC1097 | Q5V345_HALMA      | <i>sdhA1</i>     | Succinate dehydrogenase flavoprotein subunit (EC 1.3.99.1)       | 301 | 292 | 9 | 97.01  | 0 |
| rrnB0311  | Q5UW77_HALMA      | <i>ugpB</i>      | Glycerol-3-phosphate-binding protein                             | 283 | 280 | 3 | 98.94  | 0 |
| rrnAC1914 | Q5V116_HALMA      | <i>lon</i>       | ATP-dependent protease LA (EC 3.4.21.53)                         | 279 | 278 | 1 | 99.64  | 1 |
| rrnAC1449 | Q5V277_HALMA      | <i>ndHG5</i>     | NADH dehydrogenase/oxidoreductase                                | 194 | 189 | 5 | 97.42  | 0 |
| rrnAC1093 | Q5V347_HALMA      | <i>sdhB</i>      | Succinate dehydrogenase iron-sulfur protein subunit(EC 1.3.99.1) | 155 | 153 | 2 | 98.71  | 0 |
| rrnAC2227 | Q5V093_HALMA      | <i>dppF</i>      | Dipeptide ABC transporter ATP-binding                            | 133 | 129 | 4 | 96.99  | 0 |
| rrnAC2667 | Q5UZ58_HALMA      | <i>thrC3</i>     | Threonine synthase                                               | 113 | 106 | 7 | 93.81  | 0 |
| rrnAC1527 | Q5V205_HALMA      | <i>cdc48d</i>    | Cell division control protein 48                                 | 102 | 95  | 7 | 93.14  | 0 |
| pNG7059   | Q5V6S5_HALMA      | <i>prrC</i>      | Regulatory protein PrrC                                          | 68  | 67  | 1 | 98.53  | 0 |
| rrnAC0064 | RL18E_HALMAReview | <i>rpl18e</i>    | 50S ribosomal protein L18e (HI29) (L19)                          | 67  | 63  | 4 | 94.03  | 0 |
| rrnAC0065 | RL13_HALMAReview  | <i>rpl13p</i>    | 50S ribosomal protein L13P (Hmal13)                              | 57  | 56  | 1 | 98.25  | 0 |
| rrnAC1602 | RL14_HALMAReview  | <i>rpl14p</i>    | 50S ribosomal protein L14P (Hmal14) (HI27)                       | 50  | 48  | 2 | 96.00  | 0 |
| rrnB0320  | PHNC2_HALMAReview | <i>phnC2</i>     | Phosphonates import ATP-binding protein phnC 2 (EC 3.6.3.28)     | 43  | 42  | 1 | 97.67  | 0 |
| rrnAC1608 | RL2_HALMAReview   | <i>rpl2p</i>     | 50S ribosomal protein L2P (Hmal2) (HI4)                          | 41  | 38  | 3 | 92.68  | 0 |
| rrnAC3089 | Q5UY49_HALMA      | <i>pspA2</i>     | Transcription regulator                                          | 34  | 33  | 1 | 97.06  | 0 |
| rrnAC2464 | Q5UZN2_HALMA      | <i>livF-6</i>    | Branched-chain amino acid ABC transporter ATP-binding protein    | 23  | 22  | 1 | 95.65  | 0 |
| rrnAC3544 | Q5UWZ3_HALMA      | <i>htpX4</i>     | Protease heat shock protein HtpX (EC 3.4.24.-)                   | 11  | 10  | 1 | 90.91  | 4 |
| rrnAC0657 | Q5V491_HALMA      | <i>rrnAC0657</i> | P-hydroxybenzoate hydroxylase (EC 1.14.13.2)                     | 10  | 9   | 1 | 90.00  | 0 |
| rrnAC3395 | Q5UXC7_HALMA      | <i>usp24</i>     | Universal stress protein family                                  | 40  | 34  | 6 | 85.00  | 0 |
| rrnAC1590 | RL15_HALMAReview  | <i>rpl15p</i>    | 50S ribosomal protein L15P (Hmal15) (HI9)                        | 38  | 33  | 5 | 86.84  | 0 |
| rrnAC3151 | Q5UXZ5_HALMA      | <i>ubiE1</i>     | Ubiquinone/menaquinone biosynthesis methyltransferase            | 22  | 17  | 5 | 77.27  | 0 |
| rrnAC1222 | Q5V2T6_HALMA      | <i>moxR4</i>     | Methanol dehydrogenase regulatory protein                        | 16  | 14  | 2 | 87.50  | 0 |
| rrnAC3225 | Q5UXS6_HALMA      | <i>usp22</i>     | Universal stress protein                                         | 15  | 13  | 2 | 86.67  | 0 |
| rrnAC0829 | Q5V3U1_HALMA      | <i>livF-4</i>    | Branched-chain amino acid ABC transporter ATP-binding protein    | 9   | 8   | 1 | 88.89  | 0 |
| rrnAC0031 | Q5V5T8_HALMA      | <i>ugpC3</i>     | Sugar ABC transporter ATP-binding protein (UGPC)                 | 8   | 6   | 2 | 75.00  | 0 |
| rrnB0325  | Q5UW64_HALMA      | <i>ftsZ2</i>     | Cell division protein                                            | 6   | 5   | 1 | 83.33  | 0 |
| rrnAC0656 | Q5V492_HALMA      | <i>ferA3</i>     | Ferredoxin                                                       | 6   | 5   | 1 | 83.33  | 0 |
| rrnAC1074 | Q5V366_HALMA      | <i>fadD3</i>     | Long-chain fatty-acid-CoA ligase                                 | 5   | 4   | 1 | 80.00  | 0 |
| rrnAC0170 | Q5V5G6_HALMA      | <i>rrnAC0170</i> | Hypothetical protein                                             | 352 | 352 | 0 | 100.00 | 0 |
| rrnAC2115 | Q5V0I7_HALMA      | <i>rrnAC2115</i> | Hypothetical protein                                             | 160 | 160 | 0 | 100.00 | 0 |
| rrnAC0158 | Q5V5H6_HALMA      | <i>rrnAC0158</i> | Hypothetical protein                                             | 129 | 129 | 0 | 100.00 | 1 |
| rrnAC0852 | Q5V3R9_HALMA      | <i>rrnAC0852</i> | Hypothetical protein                                             | 126 | 126 | 0 | 100.00 | 1 |



|           |              |                  |                      |     |     |   |        |    |
|-----------|--------------|------------------|----------------------|-----|-----|---|--------|----|
| rrnAC0734 | Q5V425_HALMA | <i>rrnAC0734</i> | Hypothetical protein | 122 | 122 | 0 | 100.00 | 2  |
| pNG5070   | Q5V7M2_HALMA | <i>pNG5070</i>   | Hypothetical protein | 116 | 116 | 0 | 100.00 | 1  |
| rrnAC2457 | Q5UZN9_HALMA | <i>rrnAC2457</i> | Hypothetical protein | 104 | 104 | 0 | 100.00 | 6  |
| rrnAC0250 | Q5V595_HALMA | <i>rrnAC0250</i> | Hypothetical protein | 89  | 89  | 0 | 100.00 | 2  |
| rrnAC2600 | Q5UZB4_HALMA | <i>rrnAC2600</i> | Hypothetical protein | 87  | 87  | 0 | 100.00 | 2  |
| pNG5004   | Q5V7G7_HALMA | <i>pNG5004</i>   | Hypothetical protein | 82  | 82  | 0 | 100.00 | 1  |
| rrnAC1542 | Q5V1Z1_HALMA | <i>rrnAC1542</i> | Hypothetical protein | 68  | 68  | 0 | 100.00 | 1  |
| rrnAC2755 | Q5UYY6_HALMA | <i>rrnAC2755</i> | Hypothetical protein | 63  | 63  | 0 | 100.00 | 6  |
| rrnAC2307 | Q5V022_HALMA | <i>rrnAC2307</i> | Hypothetical protein | 57  | 57  | 0 | 100.00 | 7  |
| pNG6087   | Q5V747_HALMA | <i>pNG6087</i>   | Hypothetical protein | 56  | 56  | 0 | 100.00 | 0  |
| rrnB0272  | Q5UWB0_HALMA | <i>rrnB0272</i>  | Hypothetical protein | 54  | 54  | 0 | 100.00 | 2  |
| rrnAC0830 | Q5V3U0_HALMA | <i>rrnAC0830</i> | Hypothetical protein | 54  | 54  | 0 | 100.00 | 0  |
| rrnAC0160 | Q5V5H4_HALMA | <i>rrnAC0160</i> | Hypothetical protein | 54  | 54  | 0 | 100.00 | 0  |
| rrnAC0840 | Q5V3T0_HALMA | <i>rrnAC0840</i> | Hypothetical protein | 53  | 53  | 0 | 100.00 | 2  |
| pNG3012   | Q5V7Y3_HALMA | <i>pNG3012</i>   | Hypothetical protein | 52  | 52  | 0 | 100.00 | 0  |
| pNG5011   | Q5V7G9_HALMA | <i>pNG5011</i>   | Hypothetical protein | 50  | 50  | 0 | 100.00 | 10 |
| rrnAC0915 | Q5V3L2_HALMA | <i>rrnAC0915</i> | Hypothetical protein | 48  | 48  | 0 | 100.00 | 0  |
| rrnAC0899 | Q5V3M6_HALMA | <i>rrnAC0899</i> | Hypothetical protein | 47  | 47  | 0 | 100.00 | 0  |
| rrnAC1393 | Q5V2D0_HALMA | <i>rrnAC1393</i> | Hypothetical protein | 46  | 46  | 0 | 100.00 | 1  |
| rrnAC2885 | Q5UYM1_HALMA | <i>rrnAC2885</i> | Hypothetical protein | 42  | 42  | 0 | 100.00 | 0  |
| rrnAC2528 | Q5UZH2_HALMA | <i>rrnAC2528</i> | Hypothetical protein | 40  | 40  | 0 | 100.00 | 2  |
| rrnAC3016 | Q5UYB1_HALMA | <i>rrnAC3016</i> | Hypothetical protein | 39  | 39  | 0 | 100.00 | 1  |
| rrnAC1898 | Q5V129_HALMA | <i>rrnAC1898</i> | Hypothetical protein | 39  | 39  | 0 | 100.00 | 4  |
| rrnB0013  | Q5UWX6_HALMA | <i>rrnB0013</i>  | Hypothetical protein | 38  | 38  | 0 | 100.00 | 0  |
| rrnAC2469 | Q5UZM8_HALMA | <i>rrnAC2469</i> | Hypothetical protein | 38  | 38  | 0 | 100.00 | 0  |
| pNG5069   | Q5V7M3_HALMA | <i>pNG5069</i>   | Hypothetical protein | 34  | 34  | 0 | 100.00 | 10 |
| rrnAC3149 | Q5UXZ7_HALMA | <i>rrnAC3149</i> | Hypothetical protein | 34  | 34  | 0 | 100.00 | 2  |
| rrnAC2612 | Q5UZA2_HALMA | <i>rrnAC2612</i> | Hypothetical protein | 33  | 33  | 0 | 100.00 | 1  |
| rrnAC0892 | Q5V3N2_HALMA | <i>rrnAC0892</i> | Hypothetical protein | 32  | 32  | 0 | 100.00 | 0  |
| rrnAC3516 | Q5UX18_HALMA | <i>rrnAC3516</i> | Hypothetical protein | 31  | 31  | 0 | 100.00 | 0  |
| rrnAC3552 | Q5UWY7_HALMA | <i>rrnAC3552</i> | Hypothetical protein | 31  | 31  | 0 | 100.00 | 2  |
| rrnAC0079 | Q5V5P4_HALMA | <i>rrnAC0079</i> | Hypothetical protein | 30  | 30  | 0 | 100.00 | 2  |
| rrnAC0776 | Q5V3Y7_HALMA | <i>rrnAC0776</i> | Hypothetical protein | 30  | 30  | 0 | 100.00 | 0  |
| rrnAC3356 | Q5UXF8_HALMA | <i>rrnAC3356</i> | Hypothetical protein | 30  | 30  | 0 | 100.00 | 5  |
| rrnAC3438 | Q5UX86_HALMA | <i>rrnAC3438</i> | Hypothetical protein | 28  | 28  | 0 | 100.00 | 3  |
| rrnAC3227 | Q5UXS4_HALMA | <i>rrnAC3227</i> | Hypothetical protein | 28  | 28  | 0 | 100.00 | 2  |
| rrnAC0549 | Q5V4I5_HALMA | <i>rrnAC0549</i> | Hypothetical protein | 28  | 28  | 0 | 100.00 | 8  |
| rrnAC1702 | Q5V1J4_HALMA | <i>rrnAC1702</i> | Hypothetical protein | 27  | 27  | 0 | 100.00 | 2  |
| pNG7148   | Q5V6J6_HALMA | <i>pNG7148</i>   | Hypothetical protein | 26  | 26  | 0 | 100.00 | 7  |
| rrnAC3517 | Q5UX17_HALMA | <i>rrnAC3517</i> | Hypothetical protein | 25  | 25  | 0 | 100.00 | 15 |

|           |              |                  |                      |    |    |   |        |   |
|-----------|--------------|------------------|----------------------|----|----|---|--------|---|
| rrnAC1802 | Q5V1B1_HALMA | <i>rrnAC1802</i> | Hypothetical protein | 25 | 25 | 0 | 100.00 | 3 |
| rrnB0228  | Q5UWE7_HALMA | <i>rrnB0228</i>  | Hypothetical protein | 25 | 25 | 0 | 100.00 | 0 |
| rrnAC0961 | Q5V3H0_HALMA | <i>rrnAC0961</i> | Hypothetical protein | 23 | 23 | 0 | 100.00 | 2 |
| rrnAC0955 | Q5V3H6_HALMA | <i>rrnAC0955</i> | Hypothetical protein | 23 | 23 | 0 | 100.00 | 6 |
| rrnAC3185 | Q5UXW3_HALMA | <i>rrnAC3185</i> | Hypothetical protein | 22 | 22 | 0 | 100.00 | 1 |
| rrnB0304  | Q5UW84_HALMA | <i>rrnB0304</i>  | Hypothetical protein | 22 | 22 | 0 | 100.00 | 4 |
| rrnAC2729 | Q5UZ09_HALMA | <i>rrnAC2729</i> | Hypothetical protein | 22 | 22 | 0 | 100.00 | 2 |
| rrnAC2492 | Q5UZK7_HALMA | <i>rrnAC2492</i> | Hypothetical protein | 22 | 22 | 0 | 100.00 | 0 |
| rrnAC1151 | Q5V300_HALMA | <i>rrnAC1151</i> | Hypothetical protein | 22 | 22 | 0 | 100.00 | 2 |
| rrnAC2154 | Q5V0F5_HALMA | <i>rrnAC2154</i> | Hypothetical protein | 21 | 21 | 0 | 100.00 | 1 |
| rrnAC0856 | Q5V3R5_HALMA | <i>rrnAC0856</i> | Hypothetical protein | 21 | 21 | 0 | 100.00 | 0 |
| rrnAC1032 | Q5V3A5_HALMA | <i>rrnAC1032</i> | Hypothetical protein | 21 | 21 | 0 | 100.00 | 5 |
| rrnAC0117 | Q5V5L0_HALMA | <i>rrnAC0117</i> | Hypothetical protein | 21 | 21 | 0 | 100.00 | 0 |
| rrnAC1696 | Q5V1J9_HALMA | <i>rrnAC1696</i> | Hypothetical protein | 20 | 20 | 0 | 100.00 | 7 |
| rrnAC1219 | Q5V2T9_HALMA | <i>rrnAC1219</i> | Hypothetical protein | 20 | 20 | 0 | 100.00 | 2 |
| pNG7051   | Q5V6T2_HALMA | <i>pNG7051</i>   | Hypothetical protein | 20 | 20 | 0 | 100.00 | 8 |
| rrnAC2884 | Q5UYM2_HALMA | <i>rrnAC2884</i> | Hypothetical protein | 19 | 19 | 0 | 100.00 | 0 |
| rrnAC0185 | Q5V5F3_HALMA | <i>rrnAC0185</i> | Hypothetical protein | 18 | 18 | 0 | 100.00 | 1 |
| pNG7172   | Q5V6H4_HALMA | <i>pNG7172</i>   | Hypothetical protein | 16 | 16 | 0 | 100.00 | 0 |
| rrnAC1150 | Q5V301_HALMA | <i>rrnAC1150</i> | Hypothetical protein | 16 | 16 | 0 | 100.00 | 6 |
| rrnAC2546 | Q5UZF8_HALMA | <i>rrnAC2546</i> | Hypothetical protein | 16 | 16 | 0 | 100.00 | 7 |
| rrnAC3315 | Q5UXJ8_HALMA | <i>rrnAC3315</i> | Hypothetical protein | 15 | 15 | 0 | 100.00 | 0 |
| pNG7152   | Q5V6J2_HALMA | <i>pNG7152</i>   | Hypothetical protein | 15 | 15 | 0 | 100.00 | 1 |
| rrnAC1704 | Q5V1J2_HALMA | <i>rrnAC1704</i> | Hypothetical protein | 15 | 15 | 0 | 100.00 | 2 |
| pNG2015   | Q5V844_HALMA | <i>pNG2015</i>   | Hypothetical protein | 15 | 15 | 0 | 100.00 | 1 |
| rrnAC2125 | Q5V0I0_HALMA | <i>rrnAC2125</i> | Hypothetical protein | 15 | 15 | 0 | 100.00 | 3 |
| rrnAC2801 | Q5UYU6_HALMA | <i>rrnAC2801</i> | Hypothetical protein | 14 | 14 | 0 | 100.00 | 4 |
| rrnAC1022 | Q5V3B5_HALMA | <i>rrnAC1022</i> | Hypothetical protein | 14 | 14 | 0 | 100.00 | 1 |
| rrnAC0228 | Q5V5B5_HALMA | <i>rrnAC0228</i> | Hypothetical protein | 14 | 14 | 0 | 100.00 | 0 |
| pNG5010   | Q5V7H0_HALMA | <i>pNG5010</i>   | Hypothetical protein | 14 | 14 | 0 | 100.00 | 1 |
| rrnAC0936 | Q5V3J3_HALMA | <i>rrnAC0936</i> | Hypothetical protein | 13 | 13 | 0 | 100.00 | 3 |
| rrnAC0219 | Q5V5C4_HALMA | <i>rrnAC0219</i> | Hypothetical protein | 13 | 13 | 0 | 100.00 | 4 |
| rrnAC0285 | Q5V561_HALMA | <i>rrnAC0285</i> | Hypothetical protein | 13 | 13 | 0 | 100.00 | 3 |
| rrnAC2981 | Q5UYE1_HALMA | <i>rrnAC2981</i> | Hypothetical protein | 13 | 13 | 0 | 100.00 | 1 |
| rrnAC2444 | Q5UZQ0_HALMA | <i>rrnAC2444</i> | Hypothetical protein | 13 | 13 | 0 | 100.00 | 5 |
| rrnAC1629 | Q5UWS9_HALMA | <i>rrnB0067</i>  | Hypothetical protein | 12 | 12 | 0 | 100.00 | 3 |
| rrnAC1365 | Q5V2F8_HALMA | <i>rrnAC1365</i> | Hypothetical protein | 12 | 12 | 0 | 100.00 | 1 |
| pNG6086   | Q5V748_HALMA | <i>pNG6086</i>   | Hypothetical protein | 12 | 12 | 0 | 100.00 | 0 |
| rrnAC2611 | Q5UZA3_HALMA | <i>rrnAC2611</i> | Hypothetical protein | 12 | 12 | 0 | 100.00 | 2 |
| pNG7058   | Q5V6S6_HALMA | <i>pNG7058</i>   | Hypothetical protein | 12 | 12 | 0 | 100.00 | 0 |

|           |              |                  |                           |    |    |   |        |    |
|-----------|--------------|------------------|---------------------------|----|----|---|--------|----|
| rrnAC3015 | Q5UYB2_HALMA | <i>rrnAC3015</i> | Hypothetical protein      | 11 | 11 | 0 | 100.00 | 6  |
| pNG7384   | Q5V5X8_HALMA | <i>pNG7384</i>   | Hypothetical protein      | 11 | 11 | 0 | 100.00 | 0  |
| rrnAC2913 | Q5UYK0_HALMA | <i>rrnAC2913</i> | Hypothetical protein      | 11 | 11 | 0 | 100.00 | 8  |
| rrnAC2421 | Q5UZS0_HALMA | <i>rrnAC2421</i> | Hypothetical protein      | 11 | 11 | 0 | 100.00 | 0  |
| rrnAC0863 | Q5V3Q8_HALMA | <i>rrnAC0863</i> | Hypothetical protein      | 11 | 11 | 0 | 100.00 | 2  |
| rrnAC1218 | Q5V2U0_HALMA | <i>rrnAC1218</i> | Hypothetical protein      | 10 | 10 | 0 | 100.00 | 2  |
| rrnAC2074 | Q5V0M5_HALMA | <i>rrnAC2074</i> | Hypothetical protein      | 10 | 10 | 0 | 100.00 | 12 |
| pNG7166   | Q5V6I0_HALMA | <i>pNG7166</i>   | Hypothetical protein      | 10 | 10 | 0 | 100.00 | 4  |
| rrnAC3202 | Q5UXU7_HALMA | <i>rrnAC3202</i> | Hypothetical protein      | 10 | 10 | 0 | 100.00 | 0  |
| rrnAC0675 | Q5V475_HALMA | <i>rrnAC0675</i> | Hypothetical protein      | 10 | 10 | 0 | 100.00 | 6  |
| rrnAC1031 | Q5V3A6_HALMA | <i>rrnAC1031</i> | Hypothetical protein      | 10 | 10 | 0 | 100.00 | 1  |
| rrnAC3369 | Q5UXE7_HALMA | <i>htlA</i>      | Hypothetical protein htlA | 10 | 10 | 0 | 100.00 | 7  |
| rrnB0271  | Q5UWB1_HALMA | <i>rrnB0271</i>  | Hypothetical protein      | 9  | 9  | 0 | 100.00 | 13 |
| rrnAC2578 | Q5UZD2_HALMA | <i>rrnAC2578</i> | Hypothetical protein      | 9  | 9  | 0 | 100.00 | 20 |
| rrnAC0291 | Q5V555_HALMA | <i>rrnAC0291</i> | Hypothetical protein      | 9  | 9  | 0 | 100.00 | 7  |
| rrnAC3254 | Q5UXQ2_HALMA | <i>rrnAC3254</i> | Hypothetical protein      | 8  | 8  | 0 | 100.00 | 0  |
| rrnAC2443 | Q5UZQ1_HALMA | <i>rrnAC2443</i> | Hypothetical protein      | 8  | 8  | 0 | 100.00 | 1  |
| pNG7069   | Q5V6R5_HALMA | <i>pNG7069</i>   | Hypothetical protein      | 8  | 8  | 0 | 100.00 | 0  |
| rrnAC1105 | Q5V339_HALMA | <i>rrnAC1105</i> | Hypothetical protein      | 7  | 7  | 0 | 100.00 | 5  |
| rrnAC3543 | Q5UWZ4_HALMA | <i>rrnAC3543</i> | Hypothetical protein      | 7  | 7  | 0 | 100.00 | 0  |
| rrnAC3437 | Q5UX87_HALMA | <i>rrnAC3437</i> | Hypothetical protein      | 7  | 7  | 0 | 100.00 | 2  |
| rrnAC2046 | Q5V0Q0_HALMA | <i>rrnAC2046</i> | Hypothetical protein      | 7  | 7  | 0 | 100.00 | 1  |
| rrnAC3463 | Q5UX64_HALMA | <i>rrnAC3463</i> | Hypothetical protein      | 7  | 7  | 0 | 100.00 | 3  |
| rrnAC1731 | Q5V1G8_HALMA | <i>rrnAC1731</i> | Hypothetical protein      | 7  | 7  | 0 | 100.00 | 6  |
| rrnAC0305 | Q5V542_HALMA | <i>rrnAC0305</i> | Hypothetical protein      | 7  | 7  | 0 | 100.00 | 7  |
| rrnAC3435 | Q5UX89_HALMA | <i>rrnAC3435</i> | Hypothetical protein      | 7  | 7  | 0 | 100.00 | 4  |
| rrnAC1682 | Q5V1L1_HALMA | <i>rrnAC1682</i> | Hypothetical protein      | 7  | 7  | 0 | 100.00 | 2  |
| rrnAC2006 | Q5V0T5_HALMA | <i>rrnAC2006</i> | Hypothetical protein      | 6  | 6  | 0 | 100.00 | 0  |
| rrnAC2121 | Q5V0I3_HALMA | <i>rrnAC2121</i> | Hypothetical protein      | 6  | 6  | 0 | 100.00 | 3  |
| rrnAC0803 | Q5V3W2_HALMA | <i>rrnAC0803</i> | Hypothetical protein      | 6  | 6  | 0 | 100.00 | 0  |
| rrnAC1658 | Q5V1N1_HALMA | <i>rrnAC1658</i> | Hypothetical protein      | 6  | 6  | 0 | 100.00 | 2  |
| rrnAC1026 | Q5V3B1_HALMA | <i>rrnAC1026</i> | Hypothetical protein      | 6  | 6  | 0 | 100.00 | 1  |
| rrnAC2525 | Q5UZH5_HALMA | <i>rrnAC2525</i> | Hypothetical protein      | 6  | 6  | 0 | 100.00 | 3  |
| rrnAC0696 | Q5V458_HALMA | <i>rrnAC0696</i> | Hypothetical protein      | 5  | 5  | 0 | 100.00 | 0  |
| pNG6054   | Q5V6Y4_HALMA | <i>pNG6054</i>   | Hypothetical protein      | 5  | 5  | 0 | 100.00 | 1  |
| rrnAC1727 | Q5V1H2_HALMA | <i>rrnAC1727</i> | Hypothetical protein      | 5  | 5  | 0 | 100.00 | 1  |
| rrnAC2016 | Q5V0S7_HALMA | <i>rrnAC2016</i> | Hypothetical protein      | 5  | 5  | 0 | 100.00 | 2  |
| rrnAC3242 | Q5UXR2_HALMA | <i>rrnAC3242</i> | Hypothetical protein      | 5  | 5  | 0 | 100.00 | 11 |
| rrnAC1576 | Q5V1V8_HALMA | <i>rrnAC1576</i> | Hypothetical protein      | 5  | 5  | 0 | 100.00 | 0  |
| pNG7286   | Q5V669_HALMA | <i>pNG7286</i>   | Hypothetical protein      | 5  | 5  | 0 | 100.00 | 11 |

|           |              |                  |                      |      |      |    |        |    |
|-----------|--------------|------------------|----------------------|------|------|----|--------|----|
| rrnAC3452 | Q5UX73_HALMA | <i>rrnAC3452</i> | Hypothetical protein | 5    | 5    | 0  | 100.00 | 0  |
| rrnAC1398 | Q5V2C5_HALMA | <i>rrnAC1398</i> | Hypothetical protein | 5    | 5    | 0  | 100.00 | 11 |
| rrnAC1654 | Q5V1N5_HALMA | <i>rrnAC1654</i> | Hypothetical protein | 5    | 5    | 0  | 100.00 | 0  |
| rrnAC1046 | Q5V392_HALMA | <i>rrnAC1046</i> | Hypothetical protein | 4    | 4    | 0  | 100.00 | 0  |
| rrnAC3540 | Q5UWZ7_HALMA | <i>rrnAC3540</i> | Hypothetical protein | 4    | 4    | 0  | 100.00 | 13 |
| rrnAC1221 | Q5V2T7_HALMA | <i>rrnAC1221</i> | Hypothetical protein | 4    | 4    | 0  | 100.00 | 3  |
| rrnAC2538 | Q5UZG4_HALMA | <i>rrnAC2538</i> | Hypothetical protein | 4    | 4    | 0  | 100.00 | 1  |
| rrnAC3070 | Q5UY66_HALMA | <i>rrnAC3070</i> | Hypothetical protein | 4    | 4    | 0  | 100.00 | 2  |
| rrnAC3056 | Q5UY78_HALMA | <i>rrnAC3056</i> | Hypothetical protein | 4    | 4    | 0  | 100.00 | 0  |
| rrnAC0347 | Q5V508_HALMA | <i>rrnAC0347</i> | Hypothetical protein | 4    | 4    | 0  | 100.00 | 0  |
| rrnAC2732 | Q5UZ06_HALMA | <i>rrnAC2732</i> | Hypothetical protein | 4    | 4    | 0  | 100.00 | 5  |
| rrnAC1361 | Q5V2G1_HALMA | <i>rrnAC1361</i> | Hypothetical protein | 4    | 4    | 0  | 100.00 | 0  |
| rrnAC0998 | Q5V3D8_HALMA | <i>rrnAC0998</i> | Hypothetical protein | 4    | 4    | 0  | 100.00 | 0  |
| rrnAC3178 | Q5UXW9_HALMA | <i>rrnAC3178</i> | Hypothetical protein | 4    | 4    | 0  | 100.00 | 7  |
| rrnAC1733 | Q5V1G6_HALMA | <i>rrnAC1733</i> | Hypothetical protein | 4    | 4    | 0  | 100.00 | 4  |
| rrnB0280  | Q5UWA4_HALMA | <i>rrnB0280</i>  | Hypothetical protein | 3    | 3    | 0  | 100.00 | 0  |
| rrnAC0042 | Q5V5S8_HALMA | <i>rrnAC0042</i> | Hypothetical protein | 3    | 3    | 0  | 100.00 | 1  |
| pNG2038   | Q5V822_HALMA | <i>pNG2038</i>   | Hypothetical protein | 3    | 3    | 0  | 100.00 | 0  |
| rrnB0307  | Q5UW81_HALMA | <i>rrnB0307</i>  | Hypothetical protein | 3    | 3    | 0  | 100.00 | 7  |
| rrnAC1586 | Q5V1U8_HALMA | <i>rrnAC1586</i> | Hypothetical protein | 3    | 3    | 0  | 100.00 | 5  |
| rrnAC1092 | Q5V348_HALMA | <i>rrnAC1092</i> | Hypothetical protein | 3    | 3    | 0  | 100.00 | 3  |
| rrnAC3528 | Q5UX08_HALMA | <i>rrnAC3528</i> | Hypothetical protein | 3    | 3    | 0  | 100.00 | 1  |
| rrnAC0631 | Q5V4B3_HALMA | <i>rrnAC0631</i> | Hypothetical protein | 3    | 3    | 0  | 100.00 | 5  |
| pNG7304   | Q5V652_HALMA | <i>pNG7304</i>   | Hypothetical protein | 3    | 3    | 0  | 100.00 | 0  |
| rrnAC3061 | Q5UY74_HALMA | <i>rrnAC3061</i> | Hypothetical protein | 3    | 3    | 0  | 100.00 | 2  |
| rrnB0096  | Q5UWQ4_HALMA | <i>rrnB0096</i>  | Hypothetical protein | 2    | 2    | 0  | 100.00 | 0  |
| rrnAC3534 | Q5UX02_HALMA | <i>rrnAC3534</i> | Hypothetical protein | 2    | 2    | 0  | 100.00 | 5  |
| rrnAC3317 | Q5UXJ6_HALMA | <i>rrnAC3317</i> | Hypothetical protein | 2    | 2    | 0  | 100.00 | 5  |
| pNG6024   | Q5V707_HALMA | <i>pNG6024</i>   | Hypothetical protein | 2    | 2    | 0  | 100.00 | 2  |
| rrnAC3368 | Q5UXE8_HALMA | <i>rrnAC3368</i> | Hypothetical protein | 2    | 2    | 0  | 100.00 | 2  |
| rrnAC3260 | Q5UXP7_HALMA | <i>rrnAC3260</i> | Hypothetical protein | 2    | 2    | 0  | 100.00 | 0  |
| rrnAC1644 | Q5V1P4_HALMA | <i>rrnAC1644</i> | Hypothetical protein | 2    | 2    | 0  | 100.00 | 4  |
| rrnAC0424 | Q5V4U4_HALMA | <i>rrnAC0424</i> | Hypothetical protein | 2    | 2    | 0  | 100.00 | 0  |
| pNG7055   | Q5V6S9_HALMA | <i>pNG7055</i>   | Hypothetical protein | 2    | 2    | 0  | 100.00 | 1  |
| pNG6041   | Q5V713_HALMA | <i>pNG6041</i>   | Hypothetical protein | 2    | 2    | 0  | 100.00 | 4  |
| rrnAC1803 | Q5V1B0_HALMA | <i>rrnAC1803</i> | Hypothetical protein | 2633 | 2608 | 25 | 99.05  | 1  |
| rrnAC3098 | Q5UY43_HALMA | <i>rrnAC3098</i> | Hypothetical protein | 2098 | 2061 | 37 | 98.24  | 1  |
| rrnAC1443 | Q5V283_HALMA | <i>rrnAC1443</i> | Hypothetical protein | 133  | 127  | 6  | 95.49  | 0  |
| pNG6088   | Q5V746_HALMA | <i>pNG6088</i>   | Hypothetical protein | 64   | 63   | 1  | 98.44  | 0  |
| rrnAC0220 | Q5V5C3_HALMA | <i>rrnAC0220</i> | Hypothetical protein | 61   | 59   | 2  | 96.72  | 0  |

|           |              |                  |                      |    |    |    |       |   |
|-----------|--------------|------------------|----------------------|----|----|----|-------|---|
| rrnAC0931 | Q5V3J7_HALMA | <i>rrnAC0931</i> | Hypothetical protein | 39 | 38 | 1  | 97.44 | 0 |
| rrnAC1035 | Q5V3A2_HALMA | <i>rrnAC1035</i> | Hypothetical protein | 19 | 18 | 1  | 94.74 | 1 |
| rrnAC0159 | Q5V5H5_HALMA | <i>rrnAC0159</i> | Hypothetical protein | 73 | 62 | 11 | 84.93 | 0 |
| rrnAC0325 | Q5V527_HALMA | <i>rrnAC0325</i> | Hypothetical protein | 46 | 40 | 6  | 86.96 | 0 |
| rrnAC0801 | Q5V3W4_HALMA | <i>rrnAC0801</i> | Hypothetical protein | 19 | 15 | 4  | 78.95 | 0 |
| rrnAC3351 | Q5UXG3_HALMA | <i>rrnAC3351</i> | Hypothetical protein | 9  | 8  | 1  | 88.89 | 0 |
