# Supplementary material
Source: PubMed Central journal article supplement (PMC3168985)
Supplement: NIHMS304204-supplement-8_si_008.pdf [file NIHMS304204-supplement-8_si_008.pdf]

**Supplementary Table 8.** Number of proteins with peptides exclusively (100%), predominantly (75~99%) or non-predominantly (<75%) identified in membrane and number (%) of proteins with *TMHMM* predicted transmembrane domains.

| <b>% of peptides identified from membrane</b> | <b>No. proteins</b> | <b>No. proteins</b> | <b><i>TMHMM</i></b> |
|-----------------------------------------------|---------------------|---------------------|---------------------|
| 100%                                          | 397                 | 441                 | 258 (58.5%)         |
| $75 \leq n < 100\%$                           | 44                  |                     |                     |
| $25 < n < 75\%$                               | 65                  | 65                  | 2 (3.1%)            |
| $0 \leq n \leq 25\%$                          | 186                 | 804                 | 1 (0.1%)            |
| 0%                                            | 618                 |                     |                     |
