# Supplementary material
Source: PubMed Central journal article supplement (PMC3168985)
Supplement: NIHMS304204-supplement-9_si_009.pdf [file NIHMS304204-supplement-9_si_009.pdf]

**Supplementary Table 10.** Number of proteins with different ratios of OD 0.7 and 1.2 identified peptides.

|                                                                                                   | No. proteins | No. proteins | No. proteins |
|---------------------------------------------------------------------------------------------------|--------------|--------------|--------------|
| Detected in OD <sub>600</sub> = 1.2 only                                                          | 69           | 163          | 188          |
| ≥ 3X more peptides identified in OD <sub>600</sub> = 1.2 ( <i>≥ 5 peptide ID per protein</i> )    | 58           |              |              |
| ≥ 3X more peptides identified in OD <sub>600</sub> = 1.2 ( <i>3 or 4 peptide ID per protein</i> ) | 36           |              |              |
| 2~3X more peptides identified in OD <sub>600</sub> = 1.2 ( <i>≥ 10 peptide ID per protein</i> )   | 25           |              |              |
| Others                                                                                            | 939          |              |              |
| 2~3X more peptides identified in OD <sub>600</sub> = 0.7 ( <i>≥ 10 peptide ID per protein</i> )   | 40           |              | 183          |
| ≥ 3X more peptides identified in OD <sub>600</sub> = 0.7 ( <i>3 or 4 peptide ID per protein</i> ) | 30           | 143          |              |
| ≥ 3X more peptides identified in OD <sub>600</sub> = 0.7 ( <i>≥ 5 peptide ID per protein</i> )    | 52           |              |              |
| Detected in OD <sub>600</sub> = 0.7 only                                                          | 61           |              |              |
