# Supplementary material
Source: PubMed Central journal article supplement (PMC3168985)
Supplement: NIHMS304204-supplement-10_si_010.pdf [file NIHMS304204-supplement-10_si_010.pdf]

|                                                                       |                     |                  |                                                                                                                           |     |     |     |         |     |     |       |   |  |
|-----------------------------------------------------------------------|---------------------|------------------|---------------------------------------------------------------------------------------------------------------------------|-----|-----|-----|---------|-----|-----|-------|---|--|
| rrnB0092                                                              | ND                  |                  |                                                                                                                           |     |     |     |         |     |     |       |   |  |
| rrnB0095                                                              | ND                  |                  |                                                                                                                           |     |     |     |         |     |     |       |   |  |
| rrnAC1341                                                             | ND                  |                  |                                                                                                                           |     |     |     |         |     |     |       |   |  |
| rrnAC2781                                                             | ND                  |                  |                                                                                                                           |     |     |     |         |     |     |       |   |  |
| rrnAC3274                                                             | ND                  |                  |                                                                                                                           |     |     |     |         |     |     |       |   |  |
| rrnAC1318                                                             | ND                  |                  |                                                                                                                           |     |     |     |         |     |     |       |   |  |
| <b>00020 Citrate cycle (TCA cycle) [PATH:hma00020]</b>                |                     |                  |                                                                                                                           |     |     |     |         |     |     |       |   |  |
| rrnAC1092                                                             | > 2 unique peptides | <i>rrnAC1092</i> | Hypothetical protein                                                                                                      | 3   | 0   | 3   | #DIV/0! | 3   | 0   | 100   | 3 |  |
| rrnB0199                                                              | > 2 unique peptides | <i>pdhB2</i>     | Pyruvate dehydrogenase (EC 1.2.4.1)                                                                                       | 22  | 3   | 25  | 7.33    | 5   | 20  | 20    | 0 |  |
| rrnB0263                                                              | > 2 unique peptides | <i>accC1</i>     | Carbamoyl phosphate synthase L chain                                                                                      | 32  | 21  | 53  | 1.52    | 0   | 53  | 0     | 0 |  |
| rrnAC2706                                                             | > 2 unique peptides | <i>mdh</i>       | Malate dehydrogenase (EC 1.1.1.37)                                                                                        | 267 | 219 | 486 | 1.22    | 3   | 483 | 0.62  | 0 |  |
| rrnAC0718                                                             | > 2 unique peptides | <i>porA</i>      | Pyruvate ferredoxin oxidoreductase subunit alpha (EC 1.2.7.3)(EC 1.2.7.1)                                                 | 83  | 69  | 152 | 1.2     | 1   | 151 | 0.66  | 0 |  |
| rrnAC0028                                                             | > 2 unique peptides | <i>fumC</i>      | Fumarate hydratase class-II (EC 4.2.1.2)                                                                                  | 101 | 84  | 185 | 1.2     | 8   | 177 | 4.32  | 0 |  |
| rrnAC2957                                                             | > 2 unique peptides | <i>pdhA3</i>     | Pyruvate dehydrogenase E1 component alpha subunit (EC 1.2.4.1)(EC 1.2.4.4)                                                | 31  | 27  | 58  | 1.15    | 0   | 58  | 0     | 0 |  |
| rrnAC2511                                                             | > 2 unique peptides | <i>citZ</i>      | Citrate synthase II (EC 2.3.3.1)                                                                                          | 51  | 47  | 98  | 1.09    | 4   | 94  | 4.08  | 0 |  |
| rrnAC2158                                                             | > 2 unique peptides | <i>acnB</i>      | Aconitate hydratase (EC 4.2.1.3)                                                                                          | 247 | 228 | 475 | 1.08    | 88  | 387 | 18.53 | 0 |  |
| rrnAC3419                                                             | > 2 unique peptides | <i>icd</i>       | Isocitrate dehydrogenase (EC 1.1.1.42)                                                                                    | 96  | 90  | 186 | 1.07    | 11  | 175 | 5.91  | 0 |  |
| rrnAC3381                                                             | > 2 unique peptides | <i>lpdA1</i>     | Dihydrolipoamide dehydrogenase (EC 1.8.1.4)                                                                               | 5   | 5   | 10  | 1       | 0   | 10  | 0     | 0 |  |
| rrnB0197                                                              | > 2 unique peptides | <i>lpdA2</i>     | Dihydrolipoamide dehydrogenase 2 (EC 1.8.1.4) (Dihydrolipoamididehydrogenase 2)                                           | 3   | 3   | 6   | 1       | 0   | 6   | 0     | 0 |  |
| rrnAC0719                                                             | > 2 unique peptides | <i>porB</i>      | Pyruvate ferredoxin oxidoreductase subunit beta (EC 1.2.7.3)(EC 1.2.7.1)                                                  | 27  | 28  | 55  | 0.96    | 1   | 54  | 1.82  | 0 |  |
| rrnAC1267                                                             | > 2 unique peptides | <i>korA</i>      | 2-oxoglutarate ferredoxin oxidoreductase subunit alpha (EC 1.2.7.3)(EC 1.2.7.1)                                           | 126 | 137 | 263 | 0.92    | 19  | 244 | 7.22  | 0 |  |
| rrnAC0474                                                             | > 2 unique peptides | <i>sucD</i>      | Succinyl-CoA synthetase alpha chain (EC 6.2.1.5)                                                                          | 62  | 69  | 131 | 0.9     | 13  | 118 | 9.92  | 0 |  |
| rrnAC1093                                                             | > 2 unique peptides | <i>sdhB</i>      | Succinate dehydrogenase iron-sulfur protein subunit(EC 1.3.99.1)                                                          | 72  | 83  | 155 | 0.87    | 153 | 2   | 98.71 | 0 |  |
| rrnAC2956                                                             | > 2 unique peptides | <i>pdhB1</i>     | Pyruvate dehydrogenase (EC 1.2.4.1)                                                                                       | 59  | 69  | 128 | 0.86    | 20  | 108 | 15.63 | 0 |  |
| rrnAC1268                                                             | > 2 unique peptides | <i>korB</i>      | Putative 2-ketoglutarate ferredoxin oxidoreductase (Beta) (EC 1.2.7.3)(EC 1.2.7.1)                                        | 63  | 75  | 138 | 0.84    | 7   | 131 | 5.07  | 0 |  |
| rrnAC2953                                                             | > 2 unique peptides | <i>lpdA2</i>     | Dihydrolipoamide dehydrogenase 2 (EC 1.8.1.4) (Dihydrolipoamididehydrogenase 2)                                           | 30  | 37  | 67  | 0.81    | 0   | 67  | 0     | 0 |  |
| rrnAC2955                                                             | > 2 unique peptides | <i>pdhC2</i>     | Dihydrolipoamide acetyltransferase component of pyruvate dehydrogenasecomplex (EC 2.3.1.12)                               | 36  | 46  | 82  | 0.78    | 12  | 70  | 14.63 | 0 |  |
| rrnAC0472                                                             | > 2 unique peptides | <i>sucC</i>      | Succinyl-CoA synthetase beta chain (EC 6.2.1.5)                                                                           | 137 | 177 | 314 | 0.77    | 18  | 296 | 5.73  | 0 |  |
| rrnB0198                                                              | > 2 unique peptides | <i>pdhC1</i>     | Dihydrolipoamide S-acetyltransferase component of pyruvatedehydrogenase complex E2                                        | 3   | 4   | 7   | 0.75    | 0   | 7   | 0     | 0 |  |
| rrnAC1097                                                             | > 2 unique peptides | <i>sdhA1</i>     | Succinate dehydrogenase flavoprotein subunit (EC 1.3.99.1)                                                                | 121 | 180 | 301 | 0.67    | 292 | 9   | 97.01 | 0 |  |
| rrnB0200                                                              | single hit          | <i>pdhA2</i>     | Pyruvate dehydrogenase E1 component alpha subunit (EC 1.2.4.1)                                                            | 2   | 2   | 4   | 1       | 0   | 4   | 0     | 0 |  |
| rrnAC0141                                                             | single hit          | <i>sdhA2</i>     | Succinate dehydrogenase flavoprotein subunit (EC 1.3.99.1)                                                                | 0   | 3   | 3   | 0       | 0   | 3   | 0     | 0 |  |
| pNG6049                                                               | ND                  |                  |                                                                                                                           |     |     |     |         |     |     |       |   |  |
| rrnAC1091                                                             | ND                  |                  |                                                                                                                           |     |     |     |         |     |     |       |   |  |
| rrnAC0690                                                             | ND                  |                  |                                                                                                                           |     |     |     |         |     |     |       |   |  |
| rrnAC0149                                                             | ND                  |                  |                                                                                                                           |     |     |     |         |     |     |       |   |  |
| <b>00030 Pentose phosphate pathway [PATH:hma00030]</b>                |                     |                  |                                                                                                                           |     |     |     |         |     |     |       |   |  |
| pNG7073                                                               | > 2 unique peptides | <i>qgd</i>       | Quinoprotein glucose dehydrogenase (EC 1.1.5.2)                                                                           | 2   | 0   | 2   | #DIV/0! | 2   | 0   | 100   | 0 |  |
| rrnAC0011                                                             | > 2 unique peptides | <i>ywfD1</i>     | Glucose 1-dehydrogenase (EC 1.1.1.47)                                                                                     | 7   | 3   | 10  | 2.33    | 0   | 10  | 0     | 0 |  |
| rrnAC2741                                                             | > 2 unique peptides | <i>ywfD2</i>     | Glucose dehydrogenase (EC 1.1.1.47)                                                                                       | 12  | 6   | 18  | 2       | 0   | 18  | 0     | 0 |  |
| rrnAC2180                                                             | > 2 unique peptides | <i>gnd</i>       | 6-phosphogluconate dehydrogenase (EC 1.1.1.44)                                                                            | 5   | 3   | 8   | 1.67    | 0   | 8   | 0     | 0 |  |
| rrnAC0545                                                             | > 2 unique peptides | <i>pfk1</i>      | Phosphofructokinase (EC 2.7.1.11)                                                                                         | 8   | 5   | 13  | 1.6     | 0   | 13  | 0     | 0 |  |
| rrnAC1881                                                             | > 2 unique peptides | <i>deoC2</i>     | Deoxyribose-phosphate aldolase                                                                                            | 21  | 15  | 36  | 1.4     | 0   | 36  | 0     | 0 |  |
| rrnAC1138                                                             | > 2 unique peptides | <i>fbp1</i>      | Fructose-16-bisphosphatase (EC 3.1.3.11)                                                                                  | 7   | 5   | 12  | 1.4     | 0   | 12  | 0     | 0 |  |
| rrnAC2522                                                             | > 2 unique peptides | <i>manB3</i>     | Phosphoglucomutase/phosphomannomutase (EC 5.4.2.2) (EC 5.4.2.8)                                                           | 15  | 13  | 28  | 1.15    | 0   | 28  | 0     | 0 |  |
| rrnAC0345                                                             | > 2 unique peptides | <i>fba</i>       | Fructose-bisphosphate aldolase (EC 4.1.2.13)                                                                              | 88  | 89  | 177 | 0.99    | 71  | 106 | 40.11 | 0 |  |
| rrnAC3210                                                             | > 2 unique peptides | <i>pgi</i>       | Probable glucose-6-phosphate isomerase (EC 5.3.1.9) (GPI)(Phosphoglucose isomerase) (PGI) (Phosphohexose isomerase) (PHI) | 18  | 19  | 37  | 0.95    | 0   | 37  | 0     | 0 |  |
| rrnAC0772                                                             | > 2 unique peptides | <i>fbp2</i>      | Fructose-16-bisphosphatase (EC 3.1.3.11)                                                                                  | 18  | 19  | 37  | 0.95    | 0   | 37  | 0     | 0 |  |
| rrnAC3121                                                             | > 2 unique peptides | <i>eda</i>       | 2-dehydro-3-deoxyphosphogluconate aldolase/4-hydroxy-2-oxoglutaratealdolase (EC 4.1.2.14)                                 | 14  | 17  | 31  | 0.82    | 0   | 31  | 0     | 0 |  |
| rrnAC0444                                                             | > 2 unique peptides | <i>manB2</i>     | Phosphoglucomutase/phosphomannomutase (EC 5.4.2.2) (EC 5.4.2.8)                                                           | 18  | 25  | 43  | 0.72    | 0   | 43  | 0     | 0 |  |
| rrnAC3429                                                             | > 2 unique peptides | <i>deoC</i>      | Probable deoxyribose-phosphate aldolase (EC 4.1.2.4)(Phosphodeoxyriboaldolase) (Deoxyriboaldolase) (DERA)                 | 5   | 8   | 13  | 0.63    | 0   | 13  | 0     | 0 |  |
| rrnAC2568                                                             | > 2 unique peptides | <i>pmm</i>       | Phosphoglucomutase/phosphomannomutase (EC 5.4.2.2) (EC 5.4.2.8)                                                           | 22  | 37  | 59  | 0.59    | 3   | 56  | 5.08  | 0 |  |
| rrnAC0575                                                             | > 2 unique peptides | <i>dgoA4</i>     | Mandelate racemase/muconate lactonizing enzyme family                                                                     | 9   | 29  | 38  | 0.31    | 0   | 38  | 0     | 0 |  |
| rrnAC2630                                                             | single hit          | <i>prsA</i>      | Ribose-phosphate pyrophosphokinase (EC 2.7.6.1)                                                                           | 1   | 0   | 1   | #DIV/0! | 0   | 1   | 0     | 0 |  |
| rrnAC2574                                                             | single hit          | <i>manB1</i>     | Phosphoglucomutase/phosphomannomutase (EC 5.4.2.2) (EC 5.4.2.8)                                                           | 2   | 1   | 3   | 2       | 0   | 3   | 0     | 0 |  |
| rrnAC2551                                                             | single hit          | <i>kdgK</i>      | 2-keto-3-deoxygluconate kinase (EC 2.7.1.45)                                                                              | 1   | 1   | 2   | 1       | 0   | 2   | 0     | 0 |  |
| rrnAC2064                                                             | single hit          | <i>aor1</i>      | Aldehyde ferredoxin oxidoreductase                                                                                        | 1   | 1   | 2   | 1       | 0   | 2   | 0     | 0 |  |
| rrnAC2572                                                             | ND                  |                  |                                                                                                                           |     |     |     |         |     |     |       |   |  |
| rrnAC1318                                                             | ND                  |                  |                                                                                                                           |     |     |     |         |     |     |       |   |  |
| rrnAC0249                                                             | ND                  |                  |                                                                                                                           |     |     |     |         |     |     |       |   |  |
| rrnAC0342                                                             | ND                  |                  |                                                                                                                           |     |     |     |         |     |     |       |   |  |
| <b>00040 Pentose and glucuronate interconversions [PATH:hma00040]</b> |                     |                  |                                                                                                                           |     |     |     |         |     |     |       |   |  |
| rrnAC3239                                                             | > 2 unique peptides | <i>ugd2</i>      | UDP-glucose 6-dehydrogenase (EC 1.1.1.22)                                                                                 | 6   | 3   | 9   | 2       | 0   | 9   | 0     | 0 |  |
| rrnAC3121                                                             | > 2 unique peptides | <i>eda</i>       | 2-dehydro-3-deoxyphosphogluconate aldolase/4-hydroxy-2-oxoglutaratealdolase (EC 4.1.2.14)                                 | 14  | 17  | 31  | 0.82    | 0   | 31  | 0     | 0 |  |
| rrnAC2551                                                             | single hit          | <i>kdgK</i>      | 2-keto-3-deoxygluconate kinase (EC 2.7.1.45)                                                                              | 1   | 1   | 2   | 1       | 0   | 2   | 0     | 0 |  |
| rrnAC0616                                                             | ND                  |                  |                                                                                                                           |     |     |     |         |     |     |       |   |  |
| pNG7029                                                               | ND                  |                  |                                                                                                                           |     |     |     |         |     |     |       |   |  |
| <b>00051 Fructose and mannose metabolism [PATH:hma00051]</b>          |                     |                  |                                                                                                                           |     |     |     |         |     |     |       |   |  |
| rrnAC0545                                                             | > 2 unique peptides | <i>pfk1</i>      | Phosphofructokinase (EC 2.7.1.11)                                                                                         | 8   | 5   | 13  | 1.6     | 0   | 13  | 0     | 0 |  |



|                                                                          |                     |               |                                                                                                                           |     |     |     |      |    |     |       |   |  |
|--------------------------------------------------------------------------|---------------------|---------------|---------------------------------------------------------------------------------------------------------------------------|-----|-----|-----|------|----|-----|-------|---|--|
| rrnAC2353                                                                | ND                  |               |                                                                                                                           |     |     |     |      |    |     |       |   |  |
| <b>00520 Amino sugar and nucleotide sugar metabolism [PATH:hma00520]</b> |                     |               |                                                                                                                           |     |     |     |      |    |     |       |   |  |
| rrnAC3239                                                                | > 2 unique peptides | <i>ugd2</i>   | UDP-glucose 6-dehydrogenase (EC 1.1.1.22)                                                                                 | 6   | 3   | 9   | 2    | 0  | 9   | 0     | 0 |  |
| rrnAC2522                                                                | > 2 unique peptides | <i>manB3</i>  | Phosphoglucomutase/phosphomannomutase (EC 5.4.2.2) (EC 5.4.2.8)                                                           | 15  | 13  | 28  | 1.15 | 0  | 28  | 0     | 0 |  |
| rrnAC2742                                                                | > 2 unique peptides | <i>manC</i>   | Mannose-1-phosphate guanylyltransferase                                                                                   | 3   | 3   | 6   | 1    | 0  | 6   | 0     | 0 |  |
| rrnAC3210                                                                | > 2 unique peptides | <i>pgi</i>    | Probable glucose-6-phosphate isomerase (EC 5.3.1.9) (GPI)(Phosphoglucose isomerase) (PGI) (Phosphohexose isomerase) (PHI) | 18  | 19  | 37  | 0.95 | 0  | 37  | 0     | 0 |  |
| rrnAC0452                                                                | > 2 unique peptides | <i>galE</i>   | UDP-glucose 4-epimerase (EC 5.1.3.2)                                                                                      | 6   | 7   | 13  | 0.86 | 0  | 13  | 0     | 0 |  |
| rrnAC0444                                                                | > 2 unique peptides | <i>manB2</i>  | Phosphoglucomutase/phosphomannomutase (EC 5.4.2.2) (EC 5.4.2.8)                                                           | 18  | 25  | 43  | 0.72 | 0  | 43  | 0     | 0 |  |
| rrnAC2568                                                                | > 2 unique peptides | <i>pmm</i>    | Phosphoglucomutase/phosphomannomutase (EC 5.4.2.2) (EC 5.4.2.8)                                                           | 22  | 37  | 59  | 0.59 | 3  | 56  | 5.08  | 0 |  |
| rrnAC1081                                                                | > 2 unique peptides | <i>rffH1</i>  | Glucose-1-phosphate thymidyltransferase                                                                                   | 6   | 11  | 17  | 0.55 | 0  | 17  | 0     | 0 |  |
| rrnAC2897                                                                | > 2 unique peptides | <i>galE2</i>  | UDP-glucose 4-epimerase (EC 5.1.3.2)                                                                                      | 3   | 6   | 9   | 0.5  | 0  | 9   | 0     | 0 |  |
| rrnAC0855                                                                | > 2 unique peptides | <i>galE4</i>  | UDP-glucose 4-epimerase (EC 5.1.3.2)                                                                                      | 7   | 15  | 22  | 0.47 | 0  | 22  | 0     | 0 |  |
| rrnAC2574                                                                | single hit          | <i>manB1</i>  | Phosphoglucomutase/phosphomannomutase (EC 5.4.2.2) (EC 5.4.2.8)                                                           | 2   | 1   | 3   | 2    | 0  | 3   | 0     | 0 |  |
| rrnAC0470                                                                | single hit          | <i>npdA</i>   | NAD-dependent deacetylase (EC 3.5.1.-) (Regulatory protein SIR2homolog)                                                   | 0   | 1   | 1   | 0    | 0  | 1   | 0     | 0 |  |
| rrnAC0547                                                                | single hit          | <i>glcK</i>   | Glucokinase (EC 2.7.1.2)                                                                                                  | 0   | 1   | 1   | 0    | 0  | 1   | 0     | 0 |  |
| pNG7011                                                                  | ND                  |               |                                                                                                                           |     |     |     |      |    |     |       |   |  |
| rrnAC1587                                                                | ND                  |               |                                                                                                                           |     |     |     |      |    |     |       |   |  |
| rrnAC3235                                                                | ND                  |               |                                                                                                                           |     |     |     |      |    |     |       |   |  |
| pNG7014                                                                  | ND                  |               |                                                                                                                           |     |     |     |      |    |     |       |   |  |
| rrnAC3259                                                                | ND                  |               |                                                                                                                           |     |     |     |      |    |     |       |   |  |
| <b>00620 Pyruvate metabolism [PATH:hma00620]</b>                         |                     |               |                                                                                                                           |     |     |     |      |    |     |       |   |  |
| rrnB0199                                                                 | > 2 unique peptides | <i>pdhB2</i>  | Pyruvate dehydrogenase (EC 1.2.4.1)                                                                                       | 22  | 3   | 25  | 7.33 | 5  | 20  | 20    | 0 |  |
| rrnB0217                                                                 | > 2 unique peptides | <i>acs2</i>   | Acyl-coenzyme A synthetases (EC 6.2.1.1)                                                                                  | 11  | 2   | 13  | 5.5  | 0  | 13  | 0     | 0 |  |
| rrnAC3497                                                                | > 2 unique peptides | <i>yqeF</i>   | Acetyl-coA acetyltransferase (EC 2.3.1.9)                                                                                 | 3   | 1   | 4   | 3    | 0  | 4   | 0     | 0 |  |
| rrnAC2162                                                                | > 2 unique peptides | <i>mgsA</i>   | Methylglyoxal synthase (EC 4.2.3.3)                                                                                       | 6   | 3   | 9   | 2    | 0  | 9   | 0     | 0 |  |
| rrnAC0896                                                                | > 2 unique peptides | <i>acaB3</i>  | 3-ketoacyl-CoA thiolase (EC 2.3.1.9)                                                                                      | 30  | 16  | 46  | 1.88 | 0  | 46  | 0     | 0 |  |
| rrnAC0329                                                                | > 2 unique peptides | <i>leuA2</i>  | 2-isopropylmalate synthase 2 (EC 2.3.3.13)                                                                                | 5   | 3   | 8   | 1.67 | 0  | 8   | 0     | 0 |  |
| rrnAC0546                                                                | > 2 unique peptides | <i>pykA</i>   | Pyruvate kinase (EC 2.7.1.40)                                                                                             | 19  | 12  | 31  | 1.58 | 0  | 31  | 0     | 0 |  |
| rrnB0263                                                                 | > 2 unique peptides | <i>accC1</i>  | Carbamoyl phosphate synthase L chain                                                                                      | 32  | 21  | 53  | 1.52 | 0  | 53  | 0     | 0 |  |
| rrnB0242                                                                 | > 2 unique peptides | <i>acaB2</i>  | 3-ketoacyl-CoA thiolase (EC 2.3.1.9) (EC 2.3.1.16)                                                                        | 7   | 5   | 12  | 1.4  | 0  | 12  | 0     | 0 |  |
| rrnAC0903                                                                | > 2 unique peptides | <i>accA</i>   | Acetyl-CoA carboxylase alpha subunit                                                                                      | 16  | 12  | 28  | 1.33 | 0  | 28  | 0     | 0 |  |
| rrnB0240                                                                 | > 2 unique peptides | <i>aca1</i>   | Acetyl-coA acetyltransferase (EC 2.3.1.9)                                                                                 | 31  | 25  | 56  | 1.24 | 2  | 54  | 3.57  | 0 |  |
| rrnB0265                                                                 | > 2 unique peptides | <i>acs4</i>   | Acyl-coenzyme A synthetases (EC 6.2.1.1)                                                                                  | 106 | 87  | 193 | 1.22 | 8  | 185 | 4.15  | 0 |  |
| rrnAC2706                                                                | > 2 unique peptides | <i>mdh</i>    | Malate dehydrogenase (EC 1.1.1.37)                                                                                        | 267 | 219 | 486 | 1.22 | 3  | 483 | 0.62  | 0 |  |
| rrnAC0562                                                                | > 2 unique peptides | <i>pepC</i>   | Phosphoenolpyruvate carboxylase (EC 4.1.1.31)                                                                             | 52  | 44  | 96  | 1.18 | 3  | 93  | 3.13  | 0 |  |
| rrnAC2957                                                                | > 2 unique peptides | <i>pdhA3</i>  | Pyruvate dehydrogenase E1 component alpha subunit (EC 1.2.4.1)(EC 1.2.4.4)                                                | 31  | 27  | 58  | 1.15 | 0  | 58  | 0     | 0 |  |
| rrnAC2815                                                                | > 2 unique peptides | <i>aca2</i>   | Acetyl-coA acetyltransferase (EC 2.3.1.9)                                                                                 | 57  | 51  | 108 | 1.12 | 2  | 106 | 1.85  | 0 |  |
| rrnAC1795                                                                | > 2 unique peptides | <i>ppsA</i>   | Phosphoenolpyruvate synthase (EC 2.7.9.2)                                                                                 | 54  | 50  | 104 | 1.08 | 14 | 90  | 13.46 | 0 |  |
| rrnAC3381                                                                | > 2 unique peptides | <i>lpdA1</i>  | Dihydrolipoamide dehydrogenase (EC 1.8.1.4)                                                                               | 5   | 5   | 10  | 1    | 0  | 10  | 0     | 0 |  |
| rrnB0197                                                                 | > 2 unique peptides | <i>lpdA2</i>  | Dihydrolipoamide dehydrogenase 2 (EC 1.8.1.4) (Dihydrolipoamidedehydrogenase 2)                                           | 3   | 3   | 6   | 1    | 0  | 6   | 0     | 0 |  |
| rrnB0309                                                                 | > 2 unique peptides | <i>acaB1</i>  | 3-ketoacyl-CoA thiolase (EC 2.3.1.9)                                                                                      | 2   | 2   | 4   | 1    | 0  | 4   | 0     | 0 |  |
| rrnAC1754                                                                | > 2 unique peptides | <i>maeB</i>   | NAD-dependent malate dehydrogenase (EC 1.1.1.40)                                                                          | 53  | 56  | 109 | 0.95 | 3  | 106 | 2.75  | 0 |  |
| rrnAC2956                                                                | > 2 unique peptides | <i>pdhB1</i>  | Pyruvate dehydrogenase (EC 1.2.4.1)                                                                                       | 59  | 69  | 128 | 0.86 | 20 | 108 | 15.63 | 0 |  |
| rrnAC2953                                                                | > 2 unique peptides | <i>lpdA2</i>  | Dihydrolipoamide dehydrogenase 2 (EC 1.8.1.4) (Dihydrolipoamidedehydrogenase 2)                                           | 30  | 37  | 67  | 0.81 | 0  | 67  | 0     | 0 |  |
| rrnAC2955                                                                | > 2 unique peptides | <i>pdhC2</i>  | Dihydrolipoamide acetyltransferase component of pyruvate dehydrogenase complex (EC 2.3.1.12)                              | 36  | 46  | 82  | 0.78 | 12 | 70  | 14.63 | 0 |  |
| rrnB0246                                                                 | > 2 unique peptides | <i>aldY5</i>  | Aldehyde dehydrogenase (EC 1.2.1.3)                                                                                       | 47  | 62  | 109 | 0.76 | 1  | 108 | 0.92  | 0 |  |
| rrnB0198                                                                 | > 2 unique peptides | <i>pdhC1</i>  | Dihydrolipoamide S-acetyltransferase component of pyruvate dehydrogenase complex E2                                       | 3   | 4   | 7   | 0.75 | 0  | 7   | 0     | 0 |  |
| rrnAC3036                                                                | > 2 unique peptides | <i>aldY3</i>  | Aldehyde dehydrogenase                                                                                                    | 10  | 16  | 26  | 0.63 | 0  | 26  | 0     | 0 |  |
| rrnAC0650                                                                | > 2 unique peptides | <i>acs1</i>   | Acyl-coenzyme A synthetases (EC 6.2.1.1)                                                                                  | 13  | 21  | 34  | 0.62 | 1  | 33  | 2.94  | 0 |  |
| rrnAC2473                                                                | > 2 unique peptides | <i>aldY2</i>  | Aldehyde dehydrogenase (EC 1.2.1.3)                                                                                       | 83  | 140 | 223 | 0.59 | 17 | 206 | 7.62  | 0 |  |
| rrnAC1973                                                                | > 2 unique peptides | <i>aldY4</i>  | Aldehyde dehydrogenase (EC 1.2.1.3)                                                                                       | 21  | 42  | 63  | 0.5  | 1  | 62  | 1.59  | 0 |  |
| rrnAC3228                                                                | > 2 unique peptides | <i>acs5</i>   | Putative acetyl-coenzyme A synthetase (EC 6.2.1.1)                                                                        | 64  | 134 | 198 | 0.48 | 5  | 193 | 2.53  | 0 |  |
| rrnAC0201                                                                | > 2 unique peptides | <i>aldY2</i>  | Aldehyde dehydrogenase (EC 1.2.1.3)                                                                                       | 39  | 94  | 133 | 0.41 | 12 | 121 | 9.02  | 0 |  |
| rrnAC1409                                                                | > 2 unique peptides | <i>gloA1</i>  | Lactoylglutathione lyase (EC 4.4.1.5)                                                                                     | 5   | 29  | 34  | 0.17 | 0  | 34  | 0     | 0 |  |
| rrnB0200                                                                 | single hit          | <i>pdhA2</i>  | Pyruvate dehydrogenase E1 component alpha subunit (EC 1.2.4.1)                                                            | 2   | 2   | 4   | 1    | 0  | 4   | 0     | 0 |  |
| rrnAC3230                                                                | single hit          | <i>acs3</i>   | Acyl-coenzyme A synthetase (EC 6.2.1.1)                                                                                   | 0   | 1   | 1   | 0    | 0  | 1   | 0     | 0 |  |
| rrnAC1341                                                                | ND                  |               |                                                                                                                           |     |     |     |      |    |     |       |   |  |
| rrnAC0149                                                                | ND                  |               |                                                                                                                           |     |     |     |      |    |     |       |   |  |
| rrnAC1167                                                                | ND                  |               |                                                                                                                           |     |     |     |      |    |     |       |   |  |
| pNG7352                                                                  | ND                  |               |                                                                                                                           |     |     |     |      |    |     |       |   |  |
| rrnAC2631                                                                | ND                  |               |                                                                                                                           |     |     |     |      |    |     |       |   |  |
| rrnB0092                                                                 | ND                  |               |                                                                                                                           |     |     |     |      |    |     |       |   |  |
| rrnB0095                                                                 | ND                  |               |                                                                                                                           |     |     |     |      |    |     |       |   |  |
| rrnAC1966                                                                | ND                  |               |                                                                                                                           |     |     |     |      |    |     |       |   |  |
| rrnAC2504                                                                | ND                  |               |                                                                                                                           |     |     |     |      |    |     |       |   |  |
| <b>00630 Glyoxylate a</b>                                                |                     |               |                                                                                                                           |     |     |     |      |    |     |       |   |  |
| rrnAC2706                                                                | > 2 unique peptides | <i>mdh</i>    | Malate dehydrogenase (EC 1.1.1.37)                                                                                        | 267 | 219 | 486 | 1.22 | 3  | 483 | 0.62  | 0 |  |
| rrnAC2511                                                                | > 2 unique peptides | <i>citZ</i>   | Citrate synthase II (EC 2.3.3.1)                                                                                          | 51  | 47  | 98  | 1.09 | 4  | 94  | 4.08  | 0 |  |
| rrnAC2158                                                                | > 2 unique peptides | <i>acnB</i>   | Aconitate hydratase (EC 4.2.1.3)                                                                                          | 247 | 228 | 475 | 1.08 | 88 | 387 | 18.53 | 0 |  |
| rrnAC0996                                                                | > 2 unique peptides | <i>fold 1</i> | Bifunctional protein fold 1 [Includes: Methylene tetrahydrofolate dehydrogenase (EC 1.5.1.5)]                             | 14  | 15  | 29  | 0.93 | 0  | 29  | 0     | 0 |  |



|                                                    |                     |                  |                                                                                                |     |     |            |         |     |     |       |   |
|----------------------------------------------------|---------------------|------------------|------------------------------------------------------------------------------------------------|-----|-----|------------|---------|-----|-----|-------|---|
| rrnAC3121                                          | > 2 unique peptides | <i>eda</i>       | 2-dehydro-3-deoxyphosphogluconate aldolase/4-hydroxy-2-oxoglutarate aldolase (EC 4.1.2.14)     | 14  | 17  | <b>31</b>  | 0.82    | 0   | 31  | 0     | 0 |
| rrnAC3272                                          | > 2 unique peptides | <i>purU</i>      | Formyltetrahydrofolate deformylase (EC 3.5.1.10) (EC 2.1.2.2)                                  | 4   | 8   | <b>12</b>  | 0.5     | 0   | 12  | 0     | 0 |
| pNG7060                                            | > 2 unique peptides | <i>fmdA</i>      | Formamidase                                                                                    | 2   | 10  | <b>12</b>  | 0.2     | 0   | 12  | 0     | 0 |
| pNG7380                                            | > 2 unique peptides | <i>fhs</i>       | Formate--tetrahydrofolate ligase (EC 6.3.4.3) (Formyltetrahydrofolatesynthetase) (FHS) (FTHFS) | 2   | 27  | <b>29</b>  | 0.07    | 1   | 28  | 3.45  | 0 |
| pNG7318                                            | > 2 unique peptides | <i>fdhG</i>      | Formate dehydrogenase alpha subunit                                                            | 0   | 3   | <b>3</b>   | 0       | 1   | 2   | 33.33 | 0 |
| pNG7328                                            | > 2 unique peptides | <i>folD 2</i>    | Bifunctional protein folD 2 [Includes: Methylene-tetrahydrofolate dehydrogenase (EC 1.5.1.5)]  | 0   | 5   | <b>5</b>   | 0       | 0   | 5   | 0     | 0 |
| pNG6049                                            | ND                  |                  |                                                                                                |     |     |            |         |     |     |       |   |
| pNG7015                                            | ND                  |                  |                                                                                                |     |     |            |         |     |     |       |   |
| pNG7151                                            | ND                  |                  |                                                                                                |     |     |            |         |     |     |       |   |
| rrnAC1332                                          | ND                  |                  |                                                                                                |     |     |            |         |     |     |       |   |
| rrnAC1333                                          | ND                  |                  |                                                                                                |     |     |            |         |     |     |       |   |
| <b>00640 Propanoate metabolism [PATH:hma00640]</b> |                     |                  |                                                                                                |     |     |            |         |     |     |       |   |
| rrnB0217                                           | > 2 unique peptides | <i>acs2</i>      | Acyl-coenzyme A synthetases (EC 6.2.1.1)                                                       | 11  | 2   | <b>13</b>  | 5.5     | 0   | 13  | 0     | 0 |
| rrnAC3497                                          | > 2 unique peptides | <i>yqeF</i>      | Acetyl-coA acetyltransferase (EC 2.3.1.9)                                                      | 3   | 1   | <b>4</b>   | 3       | 0   | 4   | 0     | 0 |
| rrnB0254                                           | > 2 unique peptides | <i>ech6</i>      | Enoyl-CoA hydratase (EC 4.2.1.17)                                                              | 6   | 3   | <b>9</b>   | 2       | 0   | 9   | 0     | 0 |
| rrnB0261                                           | > 2 unique peptides | <i>pccB</i>      | Propionyl-CoA carboxylase beta subunit                                                         | 40  | 20  | <b>60</b>  | 2       | 0   | 60  | 0     | 0 |
| rrnAC0637                                          | > 2 unique peptides | <i>mcmA1</i>     | Methylmalonyl-CoA mutase subunit alpha                                                         | 4   | 2   | <b>6</b>   | 2       | 0   | 6   | 0     | 0 |
| rrnAC0896                                          | > 2 unique peptides | <i>acaB3</i>     | 3-ketoacyl-CoA thiolase (EC 2.3.1.9)                                                           | 30  | 16  | <b>46</b>  | 1.88    | 0   | 46  | 0     | 0 |
| rrnB0242                                           | > 2 unique peptides | <i>acaB2</i>     | 3-ketoacyl-CoA thiolase (EC 2.3.1.9) (EC 2.3.1.16)                                             | 7   | 5   | <b>12</b>  | 1.4     | 0   | 12  | 0     | 0 |
| rrnAC0903                                          | > 2 unique peptides | <i>accA</i>      | Acetyl-CoA carboxylase alpha subunit                                                           | 16  | 12  | <b>28</b>  | 1.33    | 0   | 28  | 0     | 0 |
| rrnB0240                                           | > 2 unique peptides | <i>aca1</i>      | Acetyl-coA acetyltransferase (EC 2.3.1.9)                                                      | 31  | 25  | <b>56</b>  | 1.24    | 2   | 54  | 3.57  | 0 |
| rrnB0265                                           | > 2 unique peptides | <i>acs4</i>      | Acyl-coenzyme A synthetases (EC 6.2.1.1)                                                       | 106 | 87  | <b>193</b> | 1.22    | 8   | 185 | 4.15  | 0 |
| rrnB0264                                           | > 2 unique peptides | <i>acdH</i>      | Acyl-CoA dehydrogenase (EC 1.3.99.3)                                                           | 37  | 31  | <b>68</b>  | 1.19    | 0   | 68  | 0     | 0 |
| rrnAC2815                                          | > 2 unique peptides | <i>aca2</i>      | Acetyl-coA acetyltransferase (EC 2.3.1.9)                                                      | 57  | 51  | <b>108</b> | 1.12    | 2   | 106 | 1.85  | 0 |
| rrnB0309                                           | > 2 unique peptides | <i>acaB1</i>     | 3-ketoacyl-CoA thiolase (EC 2.3.1.9)                                                           | 2   | 2   | <b>4</b>   | 1       | 0   | 4   | 0     | 0 |
| rrnAC1979                                          | > 2 unique peptides | <i>ech5</i>      | Enoyl-CoA hydratase/isomerase (EC 4.2.1.17)                                                    | 4   | 4   | <b>8</b>   | 1       | 0   | 8   | 0     | 0 |
| rrnAC1083                                          | > 2 unique peptides | <i>hbd1</i>      | 3-hydroxyacyl-CoA dehydrogenase (EC 1.1.1.35) (EC 4.2.1.17)                                    | 122 | 136 | <b>258</b> | 0.9     | 6   | 252 | 2.33  | 0 |
| rrnAC0474                                          | > 2 unique peptides | <i>sucD</i>      | Succinyl-CoA synthetase alpha chain (EC 6.2.1.5)                                               | 62  | 69  | <b>131</b> | 0.9     | 13  | 118 | 9.92  | 0 |
| rrnAC0382                                          | > 2 unique peptides | <i>gabT</i>      | 4-aminobutyrate aminotransferase                                                               | 66  | 79  | <b>145</b> | 0.84    | 8   | 137 | 5.52  | 0 |
| rrnAC1982                                          | > 2 unique peptides | <i>hbd2</i>      | 3-hydroxybutyryl-CoA dehydrogenase (EC 1.1.1.35) (EC 4.2.1.17)                                 | 17  | 22  | <b>39</b>  | 0.77    | 0   | 39  | 0     | 0 |
| rrnAC0472                                          | > 2 unique peptides | <i>sucC</i>      | Succinyl-CoA synthetase beta chain (EC 6.2.1.5)                                                | 137 | 177 | <b>314</b> | 0.77    | 18  | 296 | 5.73  | 0 |
| rrnB0246                                           | > 2 unique peptides | <i>aldY5</i>     | Aldehyde dehydrogenase (EC 1.2.1.3)                                                            | 47  | 62  | <b>109</b> | 0.76    | 1   | 108 | 0.92  | 0 |
| rrnAC1983                                          | > 2 unique peptides | <i>acdI</i>      | Acyl-CoA dehydrogenase (EC 1.3.99.3)                                                           | 4   | 6   | <b>10</b>  | 0.67    | 0   | 10  | 0     | 0 |
| rrnAC0934                                          | > 2 unique peptides | <i>mcmA3</i>     | Putative methylmalonyl-CoA mutase                                                              | 5   | 8   | <b>13</b>  | 0.63    | 0   | 13  | 0     | 0 |
| rrnAC3036                                          | > 2 unique peptides | <i>aldY3</i>     | Aldehyde dehydrogenase                                                                         | 10  | 16  | <b>26</b>  | 0.63    | 0   | 26  | 0     | 0 |
| rrnAC0650                                          | > 2 unique peptides | <i>acs1</i>      | Acyl-coenzyme A synthetases (EC 6.2.1.1)                                                       | 13  | 21  | <b>34</b>  | 0.62    | 1   | 33  | 2.94  | 0 |
| rrnAC2473                                          | > 2 unique peptides | <i>aldY2</i>     | Aldehyde dehydrogenase (EC 1.2.1.3)                                                            | 83  | 140 | <b>223</b> | 0.59    | 17  | 206 | 7.62  | 0 |
| rrnAC0833                                          | > 2 unique peptides | <i>ech2</i>      | Enoyl-CoA hydratase (EC 4.2.1.17)                                                              | 13  | 23  | <b>36</b>  | 0.57    | 3   | 33  | 8.33  | 0 |
| rrnAC2484                                          | > 2 unique peptides | <i>ech3</i>      | Enoyl-CoA hydratase (EC 4.2.1.17)                                                              | 2   | 4   | <b>6</b>   | 0.5     | 0   | 6   | 0     | 0 |
| rrnAC1973                                          | > 2 unique peptides | <i>aldY4</i>     | Aldehyde dehydrogenase (EC 1.2.1.3)                                                            | 21  | 42  | <b>63</b>  | 0.5     | 1   | 62  | 1.59  | 0 |
| rrnAC3228                                          | > 2 unique peptides | <i>acs5</i>      | Putative acetyl-coenzyme A synthetase (EC 6.2.1.1)                                             | 64  | 134 | <b>198</b> | 0.48    | 5   | 193 | 2.53  | 0 |
| rrnAC0201                                          | > 2 unique peptides | <i>aldY2</i>     | Aldehyde dehydrogenase (EC 1.2.1.3)                                                            | 39  | 94  | <b>133</b> | 0.41    | 12  | 121 | 9.02  | 0 |
| rrnB0237                                           | > 2 unique peptides | <i>ech4</i>      | Enoyl-CoA hydratase (EC 4.2.1.17)                                                              | 1   | 6   | <b>7</b>   | 0.17    | 0   | 7   | 0     | 0 |
| rrnAC1275                                          | > 2 unique peptides | <i>mcmA2</i>     | Methylmalonyl-CoA mutase subunit alpha                                                         | 0   | 4   | <b>4</b>   | 0       | 0   | 4   | 0     | 0 |
| rrnAC3230                                          | single hit          | <i>acs3</i>      | Acyl-coenzyme A synthetase (EC 6.2.1.1)                                                        | 0   | 1   | <b>1</b>   | 0       | 0   | 1   | 0     | 0 |
| rrnAC1341                                          | ND                  |                  |                                                                                                |     |     |            |         |     |     |       |   |
| pNG7352                                            | ND                  |                  |                                                                                                |     |     |            |         |     |     |       |   |
| rrnAC2631                                          | ND                  |                  |                                                                                                |     |     |            |         |     |     |       |   |
| rrnB0092                                           | ND                  |                  |                                                                                                |     |     |            |         |     |     |       |   |
| rrnB0095                                           | ND                  |                  |                                                                                                |     |     |            |         |     |     |       |   |
| <b>00650 Butanoate metabolism [PATH:hma00650]</b>  |                     |                  |                                                                                                |     |     |            |         |     |     |       |   |
| rrnAC1092                                          | > 2 unique peptides | <i>rrnAC1092</i> | Hypothetical protein                                                                           | 3   | 0   | <b>3</b>   | #DIV/0! | 3   | 0   | 100   | 3 |
| rrnAC0331                                          | > 2 unique peptides | <i>ilvN</i>      | Acetolactate synthase small subunit (EC 2.2.1.6)                                               | 2   | 0   | <b>2</b>   | #DIV/0! | 0   | 2   | 0     | 0 |
| rrnB0219                                           | > 2 unique peptides | <i>gabD</i>      | Succinate-semialdehyde dehydrogenase                                                           | 9   | 1   | <b>10</b>  | 9       | 0   | 10  | 0     | 0 |
| rrnAC2886                                          | > 2 unique peptides | <i>phaC</i>      | Poly(3-hydroxyalkanoate) synthase                                                              | 7   | 1   | <b>8</b>   | 7       | 8   | 0   | 100   | 0 |
| rrnB0199                                           | > 2 unique peptides | <i>pdhB2</i>     | Pyruvate dehydrogenase (EC 1.2.4.1)                                                            | 22  | 3   | <b>25</b>  | 7.33    | 5   | 20  | 20    | 0 |
| rrnAC3497                                          | > 2 unique peptides | <i>yqeF</i>      | Acetyl-coA acetyltransferase (EC 2.3.1.9)                                                      | 3   | 1   | <b>4</b>   | 3       | 0   | 4   | 0     | 0 |
| rrnAC0330                                          | > 2 unique peptides | <i>ilvB2</i>     | Acetolactate synthase (EC 2.2.1.6)                                                             | 8   | 3   | <b>11</b>  | 2.67    | 4   | 7   | 36.36 | 0 |
| rrnB0209                                           | > 2 unique peptides | <i>ilvB3</i>     | Acetolactate synthase large subunit (EC 2.2.1.6)                                               | 7   | 3   | <b>10</b>  | 2.33    | 0   | 10  | 0     | 0 |
| rrnB0254                                           | > 2 unique peptides | <i>ech6</i>      | Enoyl-CoA hydratase (EC 4.2.1.17)                                                              | 6   | 3   | <b>9</b>   | 2       | 0   | 9   | 0     | 0 |
| rrnAC0896                                          | > 2 unique peptides | <i>acaB3</i>     | 3-ketoacyl-CoA thiolase (EC 2.3.1.9)                                                           | 30  | 16  | <b>46</b>  | 1.88    | 0   | 46  | 0     | 0 |
| rrnB0242                                           | > 2 unique peptides | <i>acaB2</i>     | 3-ketoacyl-CoA thiolase (EC 2.3.1.9) (EC 2.3.1.16)                                             | 7   | 5   | <b>12</b>  | 1.4     | 0   | 12  | 0     | 0 |
| rrnB0240                                           | > 2 unique peptides | <i>aca1</i>      | Acetyl-coA acetyltransferase (EC 2.3.1.9)                                                      | 31  | 25  | <b>56</b>  | 1.24    | 2   | 54  | 3.57  | 0 |
| rrnAC2957                                          | > 2 unique peptides | <i>pdhA3</i>     | Pyruvate dehydrogenase E1 component alpha subunit (EC 1.2.4.1)(EC 1.2.4.4)                     | 31  | 27  | <b>58</b>  | 1.15    | 0   | 58  | 0     | 0 |
| rrnAC2815                                          | > 2 unique peptides | <i>aca2</i>      | Acetyl-coA acetyltransferase (EC 2.3.1.9)                                                      | 57  | 51  | <b>108</b> | 1.12    | 2   | 106 | 1.85  | 0 |
| rrnB0309                                           | > 2 unique peptides | <i>acaB1</i>     | 3-ketoacyl-CoA thiolase (EC 2.3.1.9)                                                           | 2   | 2   | <b>4</b>   | 1       | 0   | 4   | 0     | 0 |
| rrnAC1979                                          | > 2 unique peptides | <i>ech5</i>      | Enoyl-CoA hydratase/isomerase (EC 4.2.1.17)                                                    | 4   | 4   | <b>8</b>   | 1       | 0   | 8   | 0     | 0 |
| rrnAC1083                                          | > 2 unique peptides | <i>hbd1</i>      | 3-hydroxyacyl-CoA dehydrogenase (EC 1.1.1.35) (EC 4.2.1.17)                                    | 122 | 136 | <b>258</b> | 0.9     | 6   | 252 | 2.33  | 0 |
| rrnAC1093                                          | > 2 unique peptides | <i>sdhB</i>      | Succinate dehydrogenase iron-sulfur protein subunit (EC 1.3.99.1)                              | 72  | 83  | <b>155</b> | 0.87    | 153 | 2   | 98.71 | 0 |
| rrnAC2956                                          | > 2 unique peptides | <i>pdhB1</i>     | Pyruvate dehydrogenase (EC 1.2.4.1)                                                            | 59  | 69  | <b>128</b> | 0.86    | 20  | 108 | 15.63 | 0 |
| rrnAC0382                                          | > 2 unique peptides | <i>gabT</i>      | 4-aminobutyrate aminotransferase                                                               | 66  | 79  | <b>145</b> | 0.84    | 8   | 137 | 5.52  | 0 |

|                                                                   |                     |                  |                                                                                                                   |     |     |             |         |      |     |       |    |
|-------------------------------------------------------------------|---------------------|------------------|-------------------------------------------------------------------------------------------------------------------|-----|-----|-------------|---------|------|-----|-------|----|
| rrnAC1982                                                         | > 2 unique peptides | <i>hbd2</i>      | 3-hydroxybutyryl-CoA dehydrogenase (EC 1.1.1.35) (EC 4.2.1.17)                                                    | 17  | 22  | <b>39</b>   | 0.77    | 0    | 39  | 0     | 0  |
| rrnB0246                                                          | > 2 unique peptides | <i>aldY5</i>     | Aldehyde dehydrogenase (EC 1.2.1.3)                                                                               | 47  | 62  | <b>109</b>  | 0.76    | 1    | 108 | 0.92  | 0  |
| rrnAC0134                                                         | > 2 unique peptides | <i>ilvB1</i>     | Acetolactate synthase large subunit (EC 2.2.1.6)                                                                  | 16  | 22  | <b>38</b>   | 0.73    | 1    | 37  | 2.63  | 0  |
| rrnAC1097                                                         | > 2 unique peptides | <i>sdhA1</i>     | Succinate dehydrogenase flavoprotein subunit (EC 1.3.99.1)                                                        | 121 | 180 | <b>301</b>  | 0.67    | 292  | 9   | 97.01 | 0  |
| rrnB0238                                                          | > 2 unique peptides | <i>hbd3</i>      | 3-hydroxyacyl-CoA dehydrogenase (EC 1.1.1.35)                                                                     | 9   | 14  | <b>23</b>   | 0.64    | 4    | 19  | 17.39 | 0  |
| rrnAC3036                                                         | > 2 unique peptides | <i>aldY3</i>     | Aldehyde dehydrogenase                                                                                            | 10  | 16  | <b>26</b>   | 0.63    | 0    | 26  | 0     | 0  |
| rrnAC2473                                                         | > 2 unique peptides | <i>aldY2</i>     | Aldehyde dehydrogenase (EC 1.2.1.3)                                                                               | 83  | 140 | <b>223</b>  | 0.59    | 17   | 206 | 7.62  | 0  |
| rrnAC0833                                                         | > 2 unique peptides | <i>ech2</i>      | Enoyl-CoA hydratase (EC 4.2.1.17)                                                                                 | 13  | 23  | <b>36</b>   | 0.57    | 3    | 33  | 8.33  | 0  |
| rrnAC0771                                                         | > 2 unique peptides | <i>paaH</i>      | 3-hydroxybutyryl-CoA dehydrogenase (EC 1.1.1.35)                                                                  | 31  | 58  | <b>89</b>   | 0.53    | 0    | 89  | 0     | 0  |
| rrnAC0264                                                         | > 2 unique peptides | <i>hbd-1</i>     | 3-hydroxyacyl-CoA dehydrogenase (EC 1.1.1.35)                                                                     | 2   | 4   | <b>6</b>    | 0.5     | 0    | 6   | 0     | 0  |
| rrnAC2484                                                         | > 2 unique peptides | <i>ech3</i>      | Enoyl-CoA hydratase (EC 4.2.1.17)                                                                                 | 2   | 4   | <b>6</b>    | 0.5     | 0    | 6   | 0     | 0  |
| rrnAC1973                                                         | > 2 unique peptides | <i>aldY4</i>     | Aldehyde dehydrogenase (EC 1.2.1.3)                                                                               | 21  | 42  | <b>63</b>   | 0.5     | 1    | 62  | 1.59  | 0  |
| rrnAC0201                                                         | > 2 unique peptides | <i>aldY2</i>     | Aldehyde dehydrogenase (EC 1.2.1.3)                                                                               | 39  | 94  | <b>133</b>  | 0.41    | 12   | 121 | 9.02  | 0  |
| rrnB0237                                                          | > 2 unique peptides | <i>ech4</i>      | Enoyl-CoA hydratase (EC 4.2.1.17)                                                                                 | 1   | 6   | <b>7</b>    | 0.17    | 0    | 7   | 0     | 0  |
| rrnAC1740                                                         | > 2 unique peptides | <i>mvaS</i>      | Hydroxymethylglutaryl-CoA synthase (EC 2.3.3.10)                                                                  | 1   | 10  | <b>11</b>   | 0.1     | 0    | 11  | 0     | 0  |
| rrnB0200                                                          | single hit          | <i>pdhA2</i>     | Pyruvate dehydrogenase E1 component alpha subunit (EC 1.2.4.1)                                                    | 2   | 2   | <b>4</b>    | 1       | 0    | 4   | 0     | 0  |
| rrnAC2874                                                         | single hit          | <i>phaJ1</i>     | (R)-specific enoyl-CoA hydratase (EC 4.2.1.-)                                                                     | 0   | 1   | <b>1</b>    | 0       | 0    | 1   | 0     | 0  |
| rrnAC0141                                                         | single hit          | <i>sdhA2</i>     | Succinate dehydrogenase flavoprotein subunit (EC 1.3.99.1)                                                        | 0   | 3   | <b>3</b>    | 0       | 0    | 3   | 0     | 0  |
| rrnAC0648                                                         | single hit          | <i>bdhA</i>      | D-beta-hydroxybutyrate dehydrogenase                                                                              | 0   | 2   | <b>2</b>    | 0       | 0    | 2   | 0     | 0  |
| pNG7012                                                           | ND                  |                  |                                                                                                                   |     |     |             |         |      |     |       |    |
| rrnAC1091                                                         | ND                  |                  |                                                                                                                   |     |     |             |         |      |     |       |    |
| pNG7352                                                           | ND                  |                  |                                                                                                                   |     |     |             |         |      |     |       |    |
| rrnAC2631                                                         | ND                  |                  |                                                                                                                   |     |     |             |         |      |     |       |    |
| rrnB0092                                                          | ND                  |                  |                                                                                                                   |     |     |             |         |      |     |       |    |
| rrnB0095                                                          | ND                  |                  |                                                                                                                   |     |     |             |         |      |     |       |    |
| rrnAC0149                                                         | ND                  |                  |                                                                                                                   |     |     |             |         |      |     |       |    |
| <b>00660 C5- Branched dibasic acid metabolism [PATH:hma00660]</b> |                     |                  |                                                                                                                   |     |     |             |         |      |     |       |    |
| rrnAC0331                                                         | > 2 unique peptides | <i>ilvN</i>      | Acetolactate synthase small subunit (EC 2.2.1.6)                                                                  | 2   | 0   | <b>2</b>    | #DIV/0! | 0    | 2   | 0     | 0  |
| rrnAC0330                                                         | > 2 unique peptides | <i>ilvB2</i>     | Acetolactate synthase (EC 2.2.1.6)                                                                                | 8   | 3   | <b>11</b>   | 2.67    | 4    | 7   | 36.36 | 0  |
| rrnB0209                                                          | > 2 unique peptides | <i>ilvB3</i>     | Acetolactate synthase large subunit (EC 2.2.1.6)                                                                  | 7   | 3   | <b>10</b>   | 2.33    | 0    | 10  | 0     | 0  |
| rrnAC0474                                                         | > 2 unique peptides | <i>sucD</i>      | Succinyl-CoA synthetase alpha chain (EC 6.2.1.5)                                                                  | 62  | 69  | <b>131</b>  | 0.9     | 13   | 118 | 9.92  | 0  |
| rrnAC0472                                                         | > 2 unique peptides | <i>sucC</i>      | Succinyl-CoA synthetase beta chain (EC 6.2.1.5)                                                                   | 137 | 177 | <b>314</b>  | 0.77    | 18   | 296 | 5.73  | 0  |
| rrnAC0336                                                         | > 2 unique peptides | <i>leuD</i>      | 3-isopropylmalate dehydratase small subunit (EC 4.2.1.33)                                                         | 3   | 4   | <b>7</b>    | 0.75    | 0    | 7   | 0     | 0  |
| rrnAC0134                                                         | > 2 unique peptides | <i>ilvB1</i>     | Acetolactate synthase large subunit (EC 2.2.1.6)                                                                  | 16  | 22  | <b>38</b>   | 0.73    | 1    | 37  | 2.63  | 0  |
| rrnAC0334                                                         | > 2 unique peptides | <i>leuC</i>      | 3-isopropylmalate dehydratase large subunit (EC 4.2.1.33)(Isopropylmalate isomerase) (Alpha-IPM isomerase) (IPMI) | 2   | 9   | <b>11</b>   | 0.22    | 0    | 11  | 0     | 0  |
| rrnAC0687                                                         | ND                  |                  |                                                                                                                   |     |     |             |         |      |     |       |    |
| rrnAC0684                                                         | ND                  |                  |                                                                                                                   |     |     |             |         |      |     |       |    |
| rrnAC0984                                                         | ND                  |                  |                                                                                                                   |     |     |             |         |      |     |       |    |
| <b>00562 Inositol phosphate metabolism [PATH:hma00562]</b>        |                     |                  |                                                                                                                   |     |     |             |         |      |     |       |    |
| rrnAC1004                                                         | > 2 unique peptides | <i>suhB1</i>     | Inositol-1-monophosphatase (EC 3.1.3.25)                                                                          | 3   | 2   | <b>5</b>    | 1.5     | 0    | 5   | 0     | 0  |
| rrnAC0537                                                         | > 2 unique peptides | <i>tpiA</i>      | Triosephosphate isomerase (EC 5.3.1.1) (TIM) (Triose-phosphate isomerase)                                         | 20  | 15  | <b>35</b>   | 1.33    | 0    | 35  | 0     | 0  |
| rrnB0102                                                          | single hit          | <i>suhB2</i>     | Inositol-1-monophosphatase (EC 3.1.3.25)                                                                          | 0   | 1   | <b>1</b>    | 0       | 0    | 1   | 0     | 0  |
| <b>01102 Energy Metabolism</b>                                    |                     |                  |                                                                                                                   |     |     |             |         |      |     |       |    |
| <b>00190 Oxidative phosphorylation [PATH:hma00190]</b>            |                     |                  |                                                                                                                   |     |     |             |         |      |     |       |    |
| rrnAC1092                                                         | > 2 unique peptides | <i>rrnAC1092</i> | Hypothetical protein                                                                                              | 3   | 0   | <b>3</b>    | #DIV/0! | 3    | 0   | 100   | 3  |
| rrnAC3162                                                         | > 2 unique peptides | <i>atpD</i>      | V-type ATP synthase subunit D (EC 3.6.3.14)                                                                       | 32  | 16  | <b>48</b>   | 2       | 5    | 43  | 10.42 | 0  |
| rrnAC3530                                                         | > 2 unique peptides | <i>nuoL1</i>     | NADH dehydrogenase I L subunit                                                                                    | 22  | 14  | <b>36</b>   | 1.57    | 36   | 0   | 100   | 12 |
| rrnAC3156                                                         | > 2 unique peptides | <i>atpE</i>      | V-type ATP synthase subunit E (EC 3.6.3.14)                                                                       | 65  | 46  | <b>111</b>  | 1.41    | 39   | 72  | 35.14 | 0  |
| rrnAC1456                                                         | > 2 unique peptides | <i>ndhD</i>      | NADH dehydrogenase subunit 4                                                                                      | 22  | 17  | <b>39</b>   | 1.29    | 39   | 0   | 100   | 14 |
| rrnAC3152                                                         | > 2 unique peptides | <i>atpG</i>      | Vacuolar (H+)-ATPase G subunit (EC 3.6.3.14)                                                                      | 15  | 13  | <b>28</b>   | 1.15    | 12   | 16  | 42.86 | 0  |
| rrnAC1450                                                         | > 2 unique peptides | <i>ndhG4</i>     | NADH dehydrogenase/oxidoreductase                                                                                 | 25  | 22  | <b>47</b>   | 1.14    | 47   | 0   | 100   | 9  |
| rrnAC1448                                                         | > 2 unique peptides | <i>nuoB</i>      | NADH dehydrogenase I B subunit                                                                                    | 27  | 24  | <b>51</b>   | 1.13    | 51   | 0   | 100   | 0  |
| rrnAC1301                                                         | > 2 unique peptides | <i>yjID2</i>     | NADH dehydrogenase                                                                                                | 29  | 26  | <b>55</b>   | 1.12    | 30   | 25  | 54.55 | 0  |
| rrnAC3155                                                         | > 2 unique peptides | <i>atpC1</i>     | H+ ATP synthase subunit C (EC 3.6.3.14)                                                                           | 940 | 871 | <b>1811</b> | 1.08    | 1811 | 0   | 100   | 2  |
| rrnAC3160                                                         | > 2 unique peptides | <i>ntpB</i>      | V-type sodium ATP synthase subunit B (EC 3.6.3.14)                                                                | 180 | 183 | <b>363</b>  | 0.98    | 118  | 245 | 32.51 | 0  |
| rrnAC1154                                                         | > 2 unique peptides | <i>coxA3</i>     | Cytochrome c oxidase polypeptide I (EC 1.9.3.1)                                                                   | 74  | 76  | <b>150</b>  | 0.97    | 150  | 0   | 100   | 13 |
| rrnAC0043                                                         | > 2 unique peptides | <i>coxB1</i>     | Cytochrome c oxidase polypeptide II (EC 1.9.3.1)                                                                  | 24  | 25  | <b>49</b>   | 0.96    | 49   | 0   | 100   | 3  |
| rrnAC3154                                                         | > 2 unique peptides | <i>atpI</i>      | V-type ATP synthase subunit I (EC 3.6.3.14)                                                                       | 48  | 50  | <b>98</b>   | 0.96    | 98   | 0   | 100   | 7  |
| rrnAC1278                                                         | > 2 unique peptides | <i>coxA1</i>     | Cytochrome c oxidase polypeptide I (EC 1.9.3.1)                                                                   | 26  | 29  | <b>55</b>   | 0.9     | 55   | 0   | 100   | 13 |
| rrnAC3159                                                         | > 2 unique peptides | <i>ntpA</i>      | V-type sodium ATP synthase subunit A (EC 3.6.3.14)                                                                | 65  | 73  | <b>138</b>  | 0.89    | 26   | 112 | 18.84 | 0  |
| rrnAC3157                                                         | > 2 unique peptides | <i>ntpC</i>      | V-type ATP synthase subunit C (EC 3.6.3.14)                                                                       | 50  | 57  | <b>107</b>  | 0.88    | 78   | 29  | 72.9  | 0  |
| rrnAC1093                                                         | > 2 unique peptides | <i>sdhB</i>      | Succinate dehydrogenase iron-sulfur protein subunit (EC 1.3.99.1)                                                 | 72  | 83  | <b>155</b>  | 0.87    | 153  | 2   | 98.71 | 0  |
| rrnAC1449                                                         | > 2 unique peptides | <i>ndhG5</i>     | NADH dehydrogenase/oxidoreductase                                                                                 | 90  | 104 | <b>194</b>  | 0.87    | 189  | 5   | 97.42 | 0  |
| rrnAC1458                                                         | > 2 unique peptides | <i>ndhG3</i>     | NADH dehydrogenase/oxidoreductase                                                                                 | 24  | 31  | <b>55</b>   | 0.77    | 55   | 0   | 100   | 13 |
| rrnAC1451                                                         | > 2 unique peptides | <i>nolD</i>      | NADH dehydrogenase/oxidoreductase-like protein                                                                    | 10  | 13  | <b>23</b>   | 0.77    | 23   | 0   | 100   | 0  |
| rrnAC3285                                                         | > 2 unique peptides | <i>nolA</i>      | NADH dehydrogenase/oxidoreductase-like protein                                                                    | 27  | 38  | <b>65</b>   | 0.71    | 32   | 33  | 49.23 | 0  |
| rrnAC1455                                                         | > 2 unique peptides | <i>nuoL2</i>     | NADH dehydrogenase I L subunit                                                                                    | 44  | 63  | <b>107</b>  | 0.7     | 107  | 0   | 100   | 16 |
| rrnAC1097                                                         | > 2 unique peptides | <i>sdhA1</i>     | Succinate dehydrogenase flavoprotein subunit (EC 1.3.99.1)                                                        | 121 | 180 | <b>301</b>  | 0.67    | 292  | 9   | 97.01 | 0  |
| rrnAC1485                                                         | > 2 unique peptides | <i>yjID4</i>     | NADH dehydrogenase (EC 1.6.99.3)                                                                                  | 4   | 6   | <b>10</b>   | 0.67    | 0    | 10  | 0     | 0  |



|                                                                         |                     |                  |                                                                |     |     |            |         |    |     |       |   |   |
|-------------------------------------------------------------------------|---------------------|------------------|----------------------------------------------------------------|-----|-----|------------|---------|----|-----|-------|---|---|
| rrnAC0137                                                               | ND                  |                  |                                                                |     |     |            |         |    |     |       |   |   |
| <b>01103 Lipid Metabolism</b>                                           |                     |                  |                                                                |     |     |            |         |    |     |       |   |   |
| <b>00061 Fatty acid biosynthesis [PATH:hma00061]</b>                    |                     |                  |                                                                |     |     |            |         |    |     |       |   |   |
| rrnAC0903                                                               | > 2 unique peptides | <i>accA</i>      | Acetyl-CoA carboxylase alpha subunit                           | 16  | 12  | <b>28</b>  | 1.33    | 0  | 28  | 0     | 0 | 0 |
| rrnAC0904                                                               | > 2 unique peptides | <i>fabG1</i>     | 3-oxoacyl-[acyl-carrier protein] reductase (EC 1.1.1.100)      | 22  | 18  | <b>40</b>  | 1.22    | 0  | 40  | 0     | 0 | 0 |
| rrnAC0002                                                               | > 2 unique peptides | <i>accC2</i>     | Carbamoyl phosphate synthase L chain (EC 6.3.4.16)             | 47  | 56  | <b>103</b> | 0.84    | 6  | 97  | 5.83  | 0 | 0 |
| rrnAC1984                                                               | > 2 unique peptides | <i>fabG4</i>     | 3-oxoacyl-[acyl-carrier protein] reductase (EC 1.1.1.100)      | 8   | 10  | <b>18</b>  | 0.8     | 0  | 18  | 0     | 0 | 0 |
| pNG7335                                                                 | single hit          | <i>fabG5</i>     | 3-oxoacyl-[acyl-carrier protein] reductase (EC 1.1.1.100)      | 2   | 0   | <b>2</b>   | #DIV/0! | 0  | 2   | 0     | 0 | 0 |
| <b>00062 Fatty acid elongation in mitochondria [PATH:hma00062]</b>      |                     |                  |                                                                |     |     |            |         |    |     |       |   |   |
| rrnAC1083                                                               | > 2 unique peptides | <i>hbd1</i>      | 3-hydroxyacyl-CoA dehydrogenase (EC 1.1.1.35) (EC 4.2.1.17)    | 122 | 136 | <b>258</b> | 0.9     | 6  | 252 | 2.33  | 0 | 0 |
| rrnAC1982                                                               | > 2 unique peptides | <i>hbd2</i>      | 3-hydroxybutyryl-CoA dehydrogenase (EC 1.1.1.35) (EC 4.2.1.17) | 17  | 22  | <b>39</b>  | 0.77    | 0  | 39  | 0     | 0 | 0 |
| rrnB0238                                                                | > 2 unique peptides | <i>hbd3</i>      | 3-hydroxyacyl-CoA dehydrogenase (EC 1.1.1.35)                  | 9   | 14  | <b>23</b>  | 0.64    | 4  | 19  | 17.39 | 0 | 0 |
| rrnAC0771                                                               | > 2 unique peptides | <i>paaH</i>      | 3-hydroxybutyryl-CoA dehydrogenase (EC 1.1.1.35)               | 31  | 58  | <b>89</b>  | 0.53    | 0  | 89  | 0     | 0 | 0 |
| rrnAC0264                                                               | > 2 unique peptides | <i>hbd-1</i>     | 3-hydroxyacyl-CoA dehydrogenase (EC 1.1.1.35)                  | 2   | 4   | <b>6</b>   | 0.5     | 0  | 6   | 0     | 0 | 0 |
| <b>00071 Fatty acid metabolism [PATH:hma00071]</b>                      |                     |                  |                                                                |     |     |            |         |    |     |       |   |   |
| rrnAC1074                                                               | > 2 unique peptides | <i>fadD3</i>     | Long-chain fatty-acid-CoA ligase                               | 4   | 1   | <b>5</b>   | 4       | 4  | 1   | 80    | 0 | 0 |
| rrnAC3497                                                               | > 2 unique peptides | <i>yqeF</i>      | Acetyl-coA acetyltransferase (EC 2.3.1.9)                      | 3   | 1   | <b>4</b>   | 3       | 0  | 4   | 0     | 0 | 0 |
| rrnB0254                                                                | > 2 unique peptides | <i>ech6</i>      | Enoyl-CoA hydratase (EC 4.2.1.17)                              | 6   | 3   | <b>9</b>   | 2       | 0  | 9   | 0     | 0 | 0 |
| rrnAC0896                                                               | > 2 unique peptides | <i>acaB3</i>     | 3-ketoacyl-CoA thiolase (EC 2.3.1.9)                           | 30  | 16  | <b>46</b>  | 1.88    | 0  | 46  | 0     | 0 | 0 |
| rrnB0242                                                                | > 2 unique peptides | <i>acaB2</i>     | 3-ketoacyl-CoA thiolase (EC 2.3.1.9) (EC 2.3.1.16)             | 7   | 5   | <b>12</b>  | 1.4     | 0  | 12  | 0     | 0 | 0 |
| rrnB0240                                                                | > 2 unique peptides | <i>aca1</i>      | Acetyl-coA acetyltransferase (EC 2.3.1.9)                      | 31  | 25  | <b>56</b>  | 1.24    | 2  | 54  | 3.57  | 0 | 0 |
| rrnB0264                                                                | > 2 unique peptides | <i>acdH</i>      | Acyl-CoA dehydrogenase (EC 1.3.99.3)                           | 37  | 31  | <b>68</b>  | 1.19    | 0  | 68  | 0     | 0 | 0 |
| rrnAC2815                                                               | > 2 unique peptides | <i>aca2</i>      | Acetyl-coA acetyltransferase (EC 2.3.1.9)                      | 57  | 51  | <b>108</b> | 1.12    | 2  | 106 | 1.85  | 0 | 0 |
| rrnAC0012                                                               | > 2 unique peptides | <i>adh11</i>     | Zinc-binding dehydrogenase (EC 1.1.1.1) (EC 1.6.5.5)           | 18  | 17  | <b>35</b>  | 1.06    | 1  | 34  | 2.86  | 0 | 0 |
| rrnB0309                                                                | > 2 unique peptides | <i>acaB1</i>     | 3-ketoacyl-CoA thiolase (EC 2.3.1.9)                           | 2   | 2   | <b>4</b>   | 1       | 0  | 4   | 0     | 0 | 0 |
| rrnAC1979                                                               | > 2 unique peptides | <i>ech5</i>      | Enoyl-CoA hydratase/isomerase (EC 4.2.1.17)                    | 4   | 4   | <b>8</b>   | 1       | 0  | 8   | 0     | 0 | 0 |
| rrnAC1083                                                               | > 2 unique peptides | <i>hbd1</i>      | 3-hydroxyacyl-CoA dehydrogenase (EC 1.1.1.35) (EC 4.2.1.17)    | 122 | 136 | <b>258</b> | 0.9     | 6  | 252 | 2.33  | 0 | 0 |
| rrnAC1982                                                               | > 2 unique peptides | <i>hbd2</i>      | 3-hydroxybutyryl-CoA dehydrogenase (EC 1.1.1.35) (EC 4.2.1.17) | 17  | 22  | <b>39</b>  | 0.77    | 0  | 39  | 0     | 0 | 0 |
| rrnB0246                                                                | > 2 unique peptides | <i>aldY5</i>     | Aldehyde dehydrogenase (EC 1.2.1.3)                            | 47  | 62  | <b>109</b> | 0.76    | 1  | 108 | 0.92  | 0 | 0 |
| rrnAC1972                                                               | > 2 unique peptides | <i>gcdH</i>      | Glutaryl-CoA dehydrogenase (EC 1.3.99.7)                       | 46  | 63  | <b>109</b> | 0.73    | 3  | 106 | 2.75  | 0 | 0 |
| pNG7289                                                                 | > 2 unique peptides | <i>adh6</i>      | Zinc-binding dehydrogenase (EC 1.1.1.1) (EC 1.6.5.5)           | 9   | 13  | <b>22</b>  | 0.69    | 0  | 22  | 0     | 0 | 0 |
| rrnAC1983                                                               | > 2 unique peptides | <i>acdI</i>      | Acyl-CoA dehydrogenase (EC 1.3.99.3)                           | 4   | 6   | <b>10</b>  | 0.67    | 0  | 10  | 0     | 0 | 0 |
| rrnB0238                                                                | > 2 unique peptides | <i>hbd3</i>      | 3-hydroxyacyl-CoA dehydrogenase (EC 1.1.1.35)                  | 9   | 14  | <b>23</b>  | 0.64    | 4  | 19  | 17.39 | 0 | 0 |
| rrnAC0717                                                               | > 2 unique peptides | <i>rrnAC0717</i> | FAD/NAD binding oxidoreductase (EC 1.18.1.3)                   | 5   | 8   | <b>13</b>  | 0.63    | 0  | 13  | 0     | 0 | 0 |
| rrnAC1402                                                               | > 2 unique peptides | <i>adh4</i>      | Alcohol dehydrogenase (EC 1.1.1.1)                             | 5   | 8   | <b>13</b>  | 0.63    | 0  | 13  | 0     | 0 | 0 |
| rrnAC3036                                                               | > 2 unique peptides | <i>aldY3</i>     | Aldehyde dehydrogenase                                         | 10  | 16  | <b>26</b>  | 0.63    | 0  | 26  | 0     | 0 | 0 |
| rrnAC2473                                                               | > 2 unique peptides | <i>aldY2</i>     | Aldehyde dehydrogenase (EC 1.2.1.3)                            | 83  | 140 | <b>223</b> | 0.59    | 17 | 206 | 7.62  | 0 | 0 |
| pNG7278                                                                 | > 2 unique peptides | <i>adh12</i>     | Alcohol dehydrogenase (EC 1.1.1.1)                             | 4   | 7   | <b>11</b>  | 0.57    | 0  | 11  | 0     | 0 | 0 |
| rrnAC0833                                                               | > 2 unique peptides | <i>ech2</i>      | Enoyl-CoA hydratase (EC 4.2.1.17)                              | 13  | 23  | <b>36</b>  | 0.57    | 3  | 33  | 8.33  | 0 | 0 |
| rrnAC0191                                                               | > 2 unique peptides | <i>adh3</i>      | Zinc-binding dehydrogenase (EC 1.1.1.1) (EC 1.6.5.5)           | 6   | 11  | <b>17</b>  | 0.55    | 1  | 16  | 5.88  | 0 | 0 |
| rrnAC0771                                                               | > 2 unique peptides | <i>paaH</i>      | 3-hydroxybutyryl-CoA dehydrogenase (EC 1.1.1.35)               | 31  | 58  | <b>89</b>  | 0.53    | 0  | 89  | 0     | 0 | 0 |
| rrnAC0264                                                               | > 2 unique peptides | <i>hbd-1</i>     | 3-hydroxyacyl-CoA dehydrogenase (EC 1.1.1.35)                  | 2   | 4   | <b>6</b>   | 0.5     | 0  | 6   | 0     | 0 | 0 |
| rrnAC2484                                                               | > 2 unique peptides | <i>ech3</i>      | Enoyl-CoA hydratase (EC 4.2.1.17)                              | 2   | 4   | <b>6</b>   | 0.5     | 0  | 6   | 0     | 0 | 0 |
| rrnAC1973                                                               | > 2 unique peptides | <i>aldY4</i>     | Aldehyde dehydrogenase (EC 1.2.1.3)                            | 21  | 42  | <b>63</b>  | 0.5     | 1  | 62  | 1.59  | 0 | 0 |
| rrnAC0073                                                               | > 2 unique peptides | <i>cyc</i>       | Cytochrome P450 (EC 1.14.14.1) (EC 1.6.2.4)                    | 1   | 2   | <b>3</b>   | 0.5     | 1  | 2   | 33.33 | 0 | 0 |
| rrnAC0201                                                               | > 2 unique peptides | <i>aldY2</i>     | Aldehyde dehydrogenase (EC 1.2.1.3)                            | 39  | 94  | <b>133</b> | 0.41    | 12 | 121 | 9.02  | 0 | 0 |
| rrnAC3312                                                               | > 2 unique peptides | <i>cyp1</i>      | Cytochrome P450 (EC 1.14.14.1) (EC 1.6.2.4)                    | 1   | 3   | <b>4</b>   | 0.33    | 4  | 0   | 100   | 0 | 0 |
| rrnB0237                                                                | > 2 unique peptides | <i>ech4</i>      | Enoyl-CoA hydratase (EC 4.2.1.17)                              | 1   | 6   | <b>7</b>   | 0.17    | 0  | 7   | 0     | 0 | 0 |
| rrnAC0929                                                               | > 2 unique peptides | <i>acaB4</i>     | 3-ketoacyl-CoA thiolase (EC 2.3.1.16)                          | 1   | 10  | <b>11</b>  | 0.1     | 0  | 11  | 0     | 0 | 0 |
| pNG7032                                                                 | > 2 unique peptides | <i>adh10</i>     | Zinc-binding dehydrogenase (EC 1.1.1.1) (EC 1.6.5.5)           | 0   | 3   | <b>3</b>   | 0       | 0  | 3   | 0     | 0 | 0 |
| pNG7314                                                                 | single hit          | <i>adhC</i>      | Formaldehyde dehydrogenase (EC 1.1.1.1)                        | 1   | 1   | <b>2</b>   | 1       | 0  | 2   | 0     | 0 | 0 |
| pNG7351                                                                 | single hit          | <i>adh13</i>     | Zinc-binding dehydrogenase (EC 1.1.1.1) (EC 1.6.5.5)           | 0   | 2   | <b>2</b>   | 0       | 0  | 2   | 0     | 0 | 0 |
| pNG7022                                                                 | ND                  |                  |                                                                |     |     |            |         |    |     |       |   |   |
| pNG7101                                                                 | ND                  |                  |                                                                |     |     |            |         |    |     |       |   |   |
| pNG7103                                                                 | ND                  |                  |                                                                |     |     |            |         |    |     |       |   |   |
| rrnAC1300                                                               | ND                  |                  |                                                                |     |     |            |         |    |     |       |   |   |
| rrnAC1975                                                               | ND                  |                  |                                                                |     |     |            |         |    |     |       |   |   |
| rrnAC2172                                                               | ND                  |                  |                                                                |     |     |            |         |    |     |       |   |   |
| rrnAC3506                                                               | ND                  |                  |                                                                |     |     |            |         |    |     |       |   |   |
| pNG7352                                                                 | ND                  |                  |                                                                |     |     |            |         |    |     |       |   |   |
| rrnAC2631                                                               | ND                  |                  |                                                                |     |     |            |         |    |     |       |   |   |
| rrnB0092                                                                | ND                  |                  |                                                                |     |     |            |         |    |     |       |   |   |
| rrnB0095                                                                | ND                  |                  |                                                                |     |     |            |         |    |     |       |   |   |
| <b>00072 Synthesis and degradation of ketone bodies [PATH:hma00072]</b> |                     |                  |                                                                |     |     |            |         |    |     |       |   |   |
| rrnAC3497                                                               | > 2 unique peptides | <i>yqeF</i>      | Acetyl-coA acetyltransferase (EC 2.3.1.9)                      | 3   | 1   | <b>4</b>   | 3       | 0  | 4   | 0     | 0 | 0 |
| rrnAC0896                                                               | > 2 unique peptides | <i>acaB3</i>     | 3-ketoacyl-CoA thiolase (EC 2.3.1.9)                           | 30  | 16  | <b>46</b>  | 1.88    | 0  | 46  | 0     | 0 | 0 |
| rrnB0242                                                                | > 2 unique peptides | <i>acaB2</i>     | 3-ketoacyl-CoA thiolase (EC 2.3.1.9) (EC 2.3.1.16)             | 7   | 5   | <b>12</b>  | 1.4     | 0  | 12  | 0     | 0 | 0 |
| rrnB0240                                                                | > 2 unique peptides | <i>aca1</i>      | Acetyl-coA acetyltransferase (EC 2.3.1.9)                      | 31  | 25  | <b>56</b>  | 1.24    | 2  | 54  | 3.57  | 0 | 0 |
| rrnAC2815                                                               | > 2 unique peptides | <i>aca2</i>      | Acetyl-coA acetyltransferase (EC 2.3.1.9)                      | 57  | 51  | <b>108</b> | 1.12    | 2  | 106 | 1.85  | 0 | 0 |
| rrnB0309                                                                | > 2 unique peptides | <i>acaB1</i>     | 3-ketoacyl-CoA thiolase (EC 2.3.1.9)                           | 2   | 2   | <b>4</b>   | 1       | 0  | 4   | 0     | 0 | 0 |



|                                                                      |                     |                  |                                                                                                      |     |     |     |         |    |     |       |   |
|----------------------------------------------------------------------|---------------------|------------------|------------------------------------------------------------------------------------------------------|-----|-----|-----|---------|----|-----|-------|---|
| rrnAC1740                                                            | > 2 unique peptides | <i>mvaS</i>      | Hydroxymethylglutaryl-CoA synthase (EC 2.3.3.10)                                                     | 1   | 10  | 11  | 0.1     | 0  | 11  | 0     | 0 |
| rrnAC0648                                                            | single hit          | <i>bdhA</i>      | D-beta-hydroxybutyrate dehydrogenase                                                                 | 0   | 2   | 2   | 0       | 0  | 2   | 0     | 0 |
| <b>00100 Steroid biosynthesis [PATH:hma00100]</b>                    |                     |                  |                                                                                                      |     |     |     |         |    |     |       |   |
| rrnAC1477                                                            | ND                  |                  |                                                                                                      |     |     |     |         |    |     |       |   |
| pNG6036                                                              | ND                  |                  |                                                                                                      |     |     |     |         |    |     |       |   |
| <b>00561 Glycerolipid metabolism [PATH:hma00561]</b>                 |                     |                  |                                                                                                      |     |     |     |         |    |     |       |   |
| rrnB0246                                                             | > 2 unique peptides | <i>aldY5</i>     | Aldehyde dehydrogenase (EC 1.2.1.3)                                                                  | 47  | 62  | 109 | 0.76    | 1  | 108 | 0.92  | 0 |
| rrnAC3036                                                            | > 2 unique peptides | <i>aldY3</i>     | Aldehyde dehydrogenase                                                                               | 10  | 16  | 26  | 0.63    | 0  | 26  | 0     | 0 |
| rrnAC2473                                                            | > 2 unique peptides | <i>aldY2</i>     | Aldehyde dehydrogenase (EC 1.2.1.3)                                                                  | 83  | 140 | 223 | 0.59    | 17 | 206 | 7.62  | 0 |
| rrnAC1973                                                            | > 2 unique peptides | <i>aldY4</i>     | Aldehyde dehydrogenase (EC 1.2.1.3)                                                                  | 21  | 42  | 63  | 0.5     | 1  | 62  | 1.59  | 0 |
| rrnAC0201                                                            | > 2 unique peptides | <i>aldY2</i>     | Aldehyde dehydrogenase (EC 1.2.1.3)                                                                  | 39  | 94  | 133 | 0.41    | 12 | 121 | 9.02  | 0 |
| rrnAC0550                                                            | > 2 unique peptides | <i>glpK</i>      | Glycerol kinase (EC 2.7.1.30) (ATP:glycerol 3-phosphotransferase)(Glycerokinase) (GK)                | 8   | 32  | 40  | 0.25    | 0  | 40  | 0     | 0 |
| rrnAC0175                                                            | single hit          | <i>gldA</i>      | Glycerol-1-phosphate dehydrogenase [NAD(P)] (EC 1.1.1.6)(EC 1.1.1.261)                               | 0   | 2   | 2   | 0       | 0  | 2   | 0     | 0 |
| pNG7352                                                              | ND                  |                  |                                                                                                      |     |     |     |         |    |     |       |   |
| rrnAC2631                                                            | ND                  |                  |                                                                                                      |     |     |     |         |    |     |       |   |
| rrnB0092                                                             | ND                  |                  |                                                                                                      |     |     |     |         |    |     |       |   |
| rrnB0095                                                             | ND                  |                  |                                                                                                      |     |     |     |         |    |     |       |   |
| pNG7101                                                              | ND                  |                  |                                                                                                      |     |     |     |         |    |     |       |   |
| <b>00564 Glycerophospholipid metabolism [PATH:hma00564]</b>          |                     |                  |                                                                                                      |     |     |     |         |    |     |       |   |
| rrnAC0532                                                            | > 2 unique peptides | <i>pgsA</i>      | CDP-diacylglycerol-glycerol-3-phosphate 3-phosphatidyltransferase(EC 2.7.8.5)                        | 2   | 0   | 2   | #DIV/0! | 2  | 0   | 100   | 3 |
| rrnAC1438                                                            | > 2 unique peptides | <i>taqD</i>      | Glycerol-3-phosphate cytidyltransferase                                                              | 6   | 5   | 11  | 1.2     | 0  | 11  | 0     | 0 |
| rrnAC1955                                                            | > 2 unique peptides | <i>glpA</i>      | Glycerol-3-phosphate dehydrogenase subunit A (EC 1.1.99.5)                                           | 6   | 9   | 15  | 0.67    | 0  | 15  | 0     | 0 |
| rrnAC0554                                                            | > 2 unique peptides | <i>gpdA</i>      | Glycerol-3-phosphate dehydrogenase (EC 1.1.99.5)                                                     | 1   | 2   | 3   | 0.5     | 3  | 0   | 100   | 0 |
| rrnAC0555                                                            | > 2 unique peptides | <i>gpdB</i>      | Glycerol-3-phosphate dehydrogenase chain B                                                           | 1   | 5   | 6   | 0.2     | 6  | 0   | 100   | 0 |
| rrnAC1917                                                            | > 2 unique peptides | <i>glpQ2</i>     | Glycerophosphoryl diester phosphodiesterase (EC 3.1.4.46)                                            | 0   | 6   | 6   | 0       | 0  | 6   | 0     | 0 |
| rrnAC0788                                                            | single hit          | <i>pssA</i>      | CDP-diacylglycerol-serine O phosphatidyltransferase                                                  | 1   | 0   | 1   | #DIV/0! | 1  | 0   | 100   | 5 |
| rrnAC0556                                                            | single hit          | <i>gpdC</i>      | Glycerol-3-phosphate dehydrogenase chain C                                                           | 0   | 1   | 1   | 0       | 1  | 0   | 100   | 0 |
| rrnB0316                                                             | ND                  |                  |                                                                                                      |     |     |     |         |    |     |       |   |
| <b>00565 Ether lipid metabolism</b>                                  |                     |                  |                                                                                                      |     |     |     |         |    |     |       |   |
| <b>00600 Sphingolipid metabolism [PATH:hma00600]</b>                 |                     |                  |                                                                                                      |     |     |     |         |    |     |       |   |
| rrnAC0858                                                            | single hit          | <i>rrnAC0858</i> | Arylsulfatase (EC 3.1.6.8)                                                                           | 1   | 1   | 2   | 1       | 1  | 1   | 50    | 0 |
| pNG5066                                                              | ND                  |                  |                                                                                                      |     |     |     |         |    |     |       |   |
| <b>00591 Linoleic acid metabolism</b>                                |                     |                  |                                                                                                      |     |     |     |         |    |     |       |   |
| pNG7012                                                              | ND                  |                  |                                                                                                      |     |     |     |         |    |     |       |   |
| <b>00592 alpha-Linolenic acid metabolism [PATH:hma00592]</b>         |                     |                  |                                                                                                      |     |     |     |         |    |     |       |   |
| rrnB0242                                                             | > 2 unique peptides | <i>acaB2</i>     | 3-ketoacyl-CoA thiolase (EC 2.3.1.9) (EC 2.3.1.16)                                                   | 7   | 5   | 12  | 1.4     | 0  | 12  | 0     | 0 |
| rrnAC0929                                                            | > 2 unique peptides | <i>acaB4</i>     | 3-ketoacyl-CoA thiolase (EC 2.3.1.16)                                                                | 1   | 10  | 11  | 0.1     | 0  | 11  | 0     | 0 |
| <b>01040 Biosynthesis of unsaturated fatty acids [PATH:hma01040]</b> |                     |                  |                                                                                                      |     |     |     |         |    |     |       |   |
| rrnAC0904                                                            | > 2 unique peptides | <i>fabG1</i>     | 3-oxoacyl-[acyl-carrier protein] reductase (EC 1.1.1.100)                                            | 22  | 18  | 40  | 1.22    | 0  | 40  | 0     | 0 |
| rrnAC1984                                                            | > 2 unique peptides | <i>fabG4</i>     | 3-oxoacyl-[acyl-carrier protein] reductase (EC 1.1.1.100)                                            | 8   | 10  | 18  | 0.8     | 0  | 18  | 0     | 0 |
| pNG7335                                                              | single hit          | <i>fabG5</i>     | 3-oxoacyl-[acyl-carrier protein] reductase (EC 1.1.1.100)                                            | 2   | 0   | 2   | #DIV/0! | 0  | 2   | 0     | 0 |
| <b>01004 Lipid biosynthesis proteins</b>                             |                     |                  |                                                                                                      |     |     |     |         |    |     |       |   |
| rrnB0217                                                             | > 2 unique peptides | <i>acs2</i>      | Acyl-coenzyme A synthetases (EC 6.2.1.1)                                                             | 11  | 2   | 13  | 5.5     | 0  | 13  | 0     | 0 |
| rrnAC1074                                                            | > 2 unique peptides | <i>fadD3</i>     | Long-chain fatty-acid-CoA ligase                                                                     | 4   | 1   | 5   | 4       | 4  | 1   | 80    | 0 |
| rrnB0265                                                             | > 2 unique peptides | <i>acs4</i>      | Acyl-coenzyme A synthetases (EC 6.2.1.1)                                                             | 106 | 87  | 193 | 1.22    | 8  | 185 | 4.15  | 0 |
| rrnAC1259                                                            | > 2 unique peptides | <i>alkK2</i>     | Medium-chain-fatty-acid-CoA ligase                                                                   | 45  | 50  | 95  | 0.9     | 1  | 94  | 1.05  | 0 |
| rrnAC0847                                                            | > 2 unique peptides | <i>alkK3</i>     | Medium-chain acyl-CoA ligase                                                                         | 35  | 49  | 84  | 0.71    | 2  | 82  | 2.38  | 0 |
| rrnAC0650                                                            | > 2 unique peptides | <i>acs1</i>      | Acyl-coenzyme A synthetases (EC 6.2.1.1)                                                             | 13  | 21  | 34  | 0.62    | 1  | 33  | 2.94  | 0 |
| rrnAC1977                                                            | > 2 unique peptides | <i>alkK4</i>     | Medium-chain fatty acid-CoA ligase                                                                   | 5   | 10  | 15  | 0.5     | 0  | 15  | 0     | 0 |
| rrnAC3228                                                            | > 2 unique peptides | <i>acs5</i>      | Putative acetyl-coenzyme A synthetase (EC 6.2.1.1)                                                   | 64  | 134 | 198 | 0.48    | 5  | 193 | 2.53  | 0 |
| rrnAC3230                                                            | single hit          | <i>acs3</i>      | Acyl-coenzyme A synthetase (EC 6.2.1.1)                                                              | 0   | 1   | 1   | 0       | 0  | 1   | 0     | 0 |
| rrnAC1341                                                            | ND                  |                  |                                                                                                      |     |     |     |         |    |     |       |   |
| <b>01104 Nucleotide Metabolism</b>                                   |                     |                  |                                                                                                      |     |     |     |         |    |     |       |   |
| <b>00230 Purine metabolism [PATH:hma00230]</b>                       |                     |                  |                                                                                                      |     |     |     |         |    |     |       |   |
| rrnAC2139                                                            | > 2 unique peptides | <i>imd3</i>      | Inosine monophosphate dehydrogenase (EC 1.1.1.205)                                                   | 2   | 0   | 2   | #DIV/0! | 2  | 0   | 100   | 3 |
| rrnAC1694                                                            | > 2 unique peptides | <i>guaAA</i>     | GMP synthase [glutamine-hydrolyzing] subunit A (EC 6.3.5.2) (Glutamineamidotransferase)              | 3   | 0   | 3   | #DIV/0! | 0  | 3   | 0     | 0 |
| rrnAC0067                                                            | > 2 unique peptides | <i>rpoN</i>      | DNA-directed RNA polymerase subunit N (EC 2.7.7.6)                                                   | 2   | 0   | 2   | #DIV/0! | 0  | 2   | 0     | 0 |
| rrnAC2829                                                            | > 2 unique peptides | <i>rpoE'</i>     | DNA-directed RNA polymerase subunit E'                                                               | 22  | 7   | 29  | 3.14    | 0  | 29  | 0     | 0 |
| rrnAC0797                                                            | > 2 unique peptides | <i>purF</i>      | Amidophosphoribosyl transferase (EC 2.4.2.14)                                                        | 3   | 1   | 4   | 3       | 0  | 4   | 0     | 0 |
| rrnAC2432                                                            | > 2 unique peptides | <i>rpoH</i>      | DNA-directed RNA polymerase subunit H (EC 2.7.7.6)                                                   | 9   | 3   | 12  | 3       | 0  | 12  | 0     | 0 |
| rrnAC2691                                                            | > 2 unique peptides | <i>polC</i>      | DNA polymerase II large subunit (EC 2.7.7.7) (Pol II) [Contains: HmapolC intein (Hma pol II intein)] | 3   | 1   | 4   | 3       | 0  | 4   | 0     | 0 |
| rrnB0175                                                             | > 2 unique peptides | <i>imd2</i>      | Inosine monophosphate dehydrogenase (EC 1.1.1.205)                                                   | 13  | 6   | 19  | 2.17    | 19 | 0   | 100   | 3 |
| rrnAC2428                                                            | > 2 unique peptides | <i>rpoA</i>      | DNA-directed RNA polymerase (EC 2.7.7.6)                                                             | 70  | 41  | 111 | 1.71    | 35 | 76  | 31.53 | 0 |
| rrnAC0546                                                            | > 2 unique peptides | <i>pykA</i>      | Pyruvate kinase (EC 2.7.1.40)                                                                        | 19  | 12  | 31  | 1.58    | 0  | 31  | 0     | 0 |
| rrnAC2430                                                            | > 2 unique peptides | <i>rpoB</i>      | DNA-directed RNA polymerase subunit B                                                                | 54  | 34  | 88  | 1.59    | 28 | 60  | 31.82 | 0 |
| rrnAC2830                                                            | > 2 unique peptides | <i>rpoE''</i>    | DNA-directed RNA polymerase subunit E''                                                              | 3   | 2   | 5   | 1.5     | 0  | 5   | 0     | 0 |
| rrnAC2429                                                            | > 2 unique peptides | <i>rpoB</i>      | DNA-directed RNA polymerase beta subunit (EC 2.7.7.6)                                                | 56  | 40  | 96  | 1.4     | 3  | 93  | 3.13  | 0 |
| rrnAC2427                                                            | > 2 unique peptides | <i>rpoC</i>      | RNA polymerase Rpb1 domain 5 (EC 2.7.7.6)                                                            | 22  | 16  | 38  | 1.38    | 13 | 25  | 34.21 | 0 |
| rrnAC3472                                                            | > 2 unique peptides | <i>guaAB</i>     | GMP synthase [glutamine-hydrolyzing] subunit B (EC 6.3.5.2) (GMPsynthetase)                          | 27  | 20  | 47  | 1.35    | 0  | 47  | 0     | 0 |

|                                                    |                     |                  |                                                                                                      |     |    |            |         |    |     |       |   |
|----------------------------------------------------|---------------------|------------------|------------------------------------------------------------------------------------------------------|-----|----|------------|---------|----|-----|-------|---|
| rrnAC0267                                          | > 2 unique peptides | <i>imd1</i>      | Inosine monophosphate dehydrogenase (EC 1.1.1.205)                                                   | 10  | 8  | <b>18</b>  | 1.25    | 0  | 18  | 0     | 0 |
| rrnAC2699                                          | > 2 unique peptides | <i>rrnAC2699</i> | Putative inosine monophosphate dehydrogenase (EC 1.1.1.205)                                          | 19  | 16 | <b>35</b>  | 1.19    | 0  | 35  | 0     | 0 |
| rrnAC1622                                          | > 2 unique peptides | <i>nrdA</i>      | Ribonucleoside-diphosphate reductase alpha chain(EC 1.17.4.1)                                        | 108 | 91 | <b>199</b> | 1.19    | 5  | 194 | 2.51  | 0 |
| rrnAC0259                                          | > 2 unique peptides | <i>rpb4</i>      | RNA polymerase Rpb4                                                                                  | 20  | 17 | <b>37</b>  | 1.18    | 1  | 36  | 2.7   | 0 |
| rrnAC3269                                          | > 2 unique peptides | <i>rrnAC3269</i> | Hypothetical protein                                                                                 | 11  | 10 | <b>21</b>  | 1.1     | 0  | 21  | 0     | 0 |
| rrnAC1109                                          | > 2 unique peptides | <i>purD2</i>     | Phosphoribosylamine-glycine ligase (EC 6.3.4.13)                                                     | 33  | 32 | <b>65</b>  | 1.03    | 2  | 63  | 3.08  | 0 |
| rrnAC0192                                          | > 2 unique peptides | <i>purB</i>      | Adenylosuccinate lyase (EC 4.3.2.2)                                                                  | 11  | 11 | <b>22</b>  | 1       | 0  | 22  | 0     | 0 |
| rrnAC1396                                          | > 2 unique peptides | <i>rpoL</i>      | DNA-directed RNA polymerase subunit L (EC 2.7.7.6)                                                   | 4   | 4  | <b>8</b>   | 1       | 0  | 8   | 0     | 0 |
| rrnAC0748                                          | > 2 unique peptides | <i>guaB3</i>     | Inosine-5'-monophosphate dehydrogenase (EC 1.1.1.205)                                                | 35  | 36 | <b>71</b>  | 0.97    | 1  | 70  | 1.41  | 0 |
| rrnAC3346                                          | > 2 unique peptides | <i>adk</i>       | Adenylate kinase (EC 2.7.4.3) (ATP-AMP transphosphorylase)                                           | 39  | 40 | <b>79</b>  | 0.98    | 0  | 79  | 0     | 0 |
| rrnAC1283                                          | > 2 unique peptides | <i>purA</i>      | Adenylosuccinate synthetase (EC 6.3.4.4) (IMP--aspartate ligase)(AdSS) (AMPSase)                     | 48  | 50 | <b>98</b>  | 0.96    | 1  | 97  | 1.02  | 0 |
| rrnAC0189                                          | > 2 unique peptides | <i>purH</i>      | Bifunctional purine biosynthesis protein PurH (EC 3.5.4.10)(EC 2.1.2.3) (EC 2.1.2.2)                 | 28  | 33 | <b>61</b>  | 0.85    | 0  | 61  | 0     | 0 |
| rrnAC2659                                          | > 2 unique peptides | <i>rrnAC2659</i> | Hypothetical protein                                                                                 | 18  | 22 | <b>40</b>  | 0.82    | 0  | 40  | 0     | 0 |
| rrnAC2153                                          | > 2 unique peptides | <i>mutT2</i>     | Mut/nudix family protein                                                                             | 4   | 5  | <b>9</b>   | 0.8     | 0  | 9   | 0     | 0 |
| rrnAC0438                                          | > 2 unique peptides | <i>purM</i>      | Phosphoribosylformylglycinamide cyclo-ligase (EC 6.3.3.1)                                            | 12  | 15 | <b>27</b>  | 0.8     | 0  | 27  | 0     | 0 |
| rrnAC0106                                          | > 2 unique peptides | <i>ndk</i>       | Nucleoside diphosphate kinase (EC 2.7.4.6) (NDK) (NDP kinase)(Nucleoside-2-P kinase)                 | 17  | 22 | <b>39</b>  | 0.77    | 0  | 39  | 0     | 0 |
| rrnAC0514                                          | > 2 unique peptides | <i>surE</i>      | 5'-nucleotidase surE (EC 3.1.3.5) (Nucleoside 5'-monophosphatephosphohydrolase)                      | 3   | 4  | <b>7</b>   | 0.75    | 0  | 7   | 0     | 0 |
| rrnAC1446                                          | > 2 unique peptides | <i>purE</i>      | Phosphoribosylaminoimidazole carboxylase catalytic subunit (EC 4.1.1.21)                             | 8   | 11 | <b>19</b>  | 0.73    | 0  | 19  | 0     | 0 |
| rrnAC0062                                          | > 2 unique peptides | <i>rpoD</i>      | DNA-directed RNA polymerase subunit D (EC 2.7.7.6)                                                   | 4   | 7  | <b>11</b>  | 0.57    | 0  | 11  | 0     | 0 |
| rrnAC3272                                          | > 2 unique peptides | <i>purU</i>      | Formyltetrahydrofolate deformylase (EC 3.5.1.10) (EC 2.1.2.2)                                        | 4   | 8  | <b>12</b>  | 0.5     | 0  | 12  | 0     | 0 |
| rrnAC1390                                          | > 2 unique peptides | <i>purL</i>      | Phosphoribosylformylglycinamide synthase II (EC 6.3.5.3) (FGAMsynthase II)                           | 5   | 10 | <b>15</b>  | 0.5     | 0  | 15  | 0     | 0 |
| rrnAC3268                                          | > 2 unique peptides | <i>purQ</i>      | Phosphoribosylformylglycinamide synthase I (EC 6.3.5.3)                                              | 2   | 4  | <b>6</b>   | 0.5     | 0  | 6   | 0     | 0 |
| rrnAC1431                                          | > 2 unique peptides | <i>purK</i>      | Phosphoribosylaminoimidazole carboxylase ATP binding subunit (EC 4.1.1.21)                           | 1   | 2  | <b>3</b>   | 0.5     | 0  | 3   | 0     | 0 |
| rrnAC1831                                          | > 2 unique peptides | <i>polB1</i>     | DNA polymerase B elongation subunit (EC 2.7.7.7)                                                     | 1   | 2  | <b>3</b>   | 0.5     | 0  | 3   | 0     | 0 |
| rrnAC3275                                          | > 2 unique peptides | <i>purC</i>      | Phosphoribosylaminoimidazole-succinocarboxamide synthase(EC 6.3.2.6)                                 | 2   | 5  | <b>7</b>   | 0.4     | 0  | 7   | 0     | 0 |
| rrnAC3523                                          | > 2 unique peptides | <i>apt</i>       | Adenine phosphoribosyltransferase (EC 2.4.2.7) (APRT)                                                | 2   | 6  | <b>8</b>   | 0.33    | 0  | 8   | 0     | 0 |
| rrnAC2630                                          | single hit          | <i>prsA</i>      | Ribose-phosphate pyrophosphokinase (EC 2.7.6.1)                                                      | 1   | 0  | <b>1</b>   | #DIV/0! | 0  | 1   | 0     | 0 |
| rrnAC3256                                          | single hit          | <i>rrnAC3256</i> | Hypothetical protein                                                                                 | 0   | 1  | <b>1</b>   | 0       | 0  | 1   | 0     | 0 |
| rrnAC0218                                          | single hit          | <i>rpoM</i>      | DNA-directed RNA-polymerase subunit M                                                                | 0   | 1  | <b>1</b>   | 0       | 0  | 1   | 0     | 0 |
| rrnAC0307                                          | ND                  |                  |                                                                                                      |     |    |            |         |    |     |       |   |
| rrnAC1903                                          | ND                  |                  |                                                                                                      |     |    |            |         |    |     |       |   |
| rrnAC0226                                          | ND                  |                  |                                                                                                      |     |    |            |         |    |     |       |   |
| pNG7153                                            | ND                  |                  |                                                                                                      |     |    |            |         |    |     |       |   |
| rrnAC1274                                          | ND                  |                  |                                                                                                      |     |    |            |         |    |     |       |   |
| rrnAC2924                                          | ND                  |                  |                                                                                                      |     |    |            |         |    |     |       |   |
| rrnB0283                                           | ND                  |                  |                                                                                                      |     |    |            |         |    |     |       |   |
| rrnAC0068                                          | ND                  |                  |                                                                                                      |     |    |            |         |    |     |       |   |
| rrnAC0313                                          | ND                  |                  |                                                                                                      |     |    |            |         |    |     |       |   |
| rrnAC1668                                          | ND                  |                  |                                                                                                      |     |    |            |         |    |     |       |   |
| pNG6176                                            | ND                  |                  |                                                                                                      |     |    |            |         |    |     |       |   |
| rrnAC2714                                          | ND                  |                  |                                                                                                      |     |    |            |         |    |     |       |   |
| rrnAC1232                                          | ND                  |                  |                                                                                                      |     |    |            |         |    |     |       |   |
| rrnAC0282                                          | ND                  |                  |                                                                                                      |     |    |            |         |    |     |       |   |
| rrnAC0894                                          | ND                  |                  |                                                                                                      |     |    |            |         |    |     |       |   |
| rrnAC2493                                          | ND                  |                  |                                                                                                      |     |    |            |         |    |     |       |   |
| rrnAC1504                                          | ND                  |                  |                                                                                                      |     |    |            |         |    |     |       |   |
| pNG7124                                            | ND                  |                  |                                                                                                      |     |    |            |         |    |     |       |   |
| pNG7123                                            | ND                  |                  |                                                                                                      |     |    |            |         |    |     |       |   |
| pNG7125                                            | ND                  |                  |                                                                                                      |     |    |            |         |    |     |       |   |
| <b>00240 Pyrimidine metabolism [PATH:hma00240]</b> |                     |                  |                                                                                                      |     |    |            |         |    |     |       |   |
| rrnAC0067                                          | > 2 unique peptides | <i>rpoN</i>      | DNA-directed RNA polymerase subunit N (EC 2.7.7.6)                                                   | 2   | 0  | <b>2</b>   | #DIV/0! | 0  | 2   | 0     | 0 |
| rrnAC2829                                          | > 2 unique peptides | <i>rpoE'</i>     | DNA-directed RNA polymerase subunit E'                                                               | 22  | 7  | <b>29</b>  | 3.14    | 0  | 29  | 0     | 0 |
| rrnAC2432                                          | > 2 unique peptides | <i>rpoH</i>      | DNA-directed RNA polymerase subunit H (EC 2.7.7.6)                                                   | 9   | 3  | <b>12</b>  | 3       | 0  | 12  | 0     | 0 |
| rrnAC2691                                          | > 2 unique peptides | <i>polC</i>      | DNA polymerase II large subunit (EC 2.7.7.7) (Pol II) [Contains: HmapolC intein (Hma pol II intein)] | 3   | 1  | <b>4</b>   | 3       | 0  | 4   | 0     | 0 |
| rrnAC2969                                          | > 2 unique peptides | <i>pyrD</i>      | Dihydroorotate dehydrogenase (EC 1.3.3.1) (Dihydroorotate oxidase)(DHODase) (DHODase)                | 32  | 15 | <b>47</b>  | 2.13    | 47 | 0   | 100   | 0 |
| rrnAC3363                                          | > 2 unique peptides | <i>carA</i>      | Carbamoyl-phosphate synthase small chain (EC 6.3.5.5)                                                | 10  | 5  | <b>15</b>  | 2       | 0  | 15  | 0     | 0 |
| rrnAC3343                                          | > 2 unique peptides | <i>cmk</i>       | Cytidylate kinase (EC 2.7.4.14) (CK) (Cytidine monophosphate kinase)(CMP kinase)                     | 4   | 2  | <b>6</b>   | 2       | 0  | 6   | 0     | 0 |
| rrnAC2159                                          | > 2 unique peptides | <i>dcd3</i>      | Probable deoxyuridine 5'-triphosphate nucleotidohydrolase(EC 3.6.1.23)                               | 2   | 1  | <b>3</b>   | 2       | 0  | 3   | 0     | 0 |
| rrnAC3360                                          | > 2 unique peptides | <i>carB</i>      | Carbamoylphosphate synthetase large subunit (EC 6.3.5.5)                                             | 17  | 9  | <b>26</b>  | 1.89    | 0  | 26  | 0     | 0 |
| rrnAC1121                                          | > 2 unique peptides | <i>thyX</i>      | Thymidylate synthase thyX (EC 2.1.1.148) (TS) (TSase)                                                | 19  | 11 | <b>30</b>  | 1.73    | 0  | 30  | 0     | 0 |
| rrnAC2428                                          | > 2 unique peptides | <i>rpoA</i>      | DNA-directed RNA polymerase (EC 2.7.7.6)                                                             | 70  | 41 | <b>111</b> | 1.71    | 35 | 76  | 31.53 | 0 |
| rrnAC2430                                          | > 2 unique peptides | <i>rpoB</i>      | DNA-directed RNA polymerase subunit B                                                                | 54  | 34 | <b>88</b>  | 1.59    | 28 | 60  | 31.82 | 0 |
| rrnAC3434                                          | > 2 unique peptides | <i>udpI</i>      | Uridine phosphorylase (EC 2.4.2.3)                                                                   | 11  | 7  | <b>18</b>  | 1.57    | 0  | 18  | 0     | 0 |
| rrnAC2577                                          | > 2 unique peptides | <i>upp</i>       | Probable uracil phosphoribosyltransferase (EC 2.4.2.9) (UMPpyrophosphorylase) (UPRTase)              | 29  | 19 | <b>48</b>  | 1.53    | 3  | 45  | 6.25  | 0 |
| rrnAC2521                                          | > 2 unique peptides | <i>pyrE1</i>     | Orotate phosphoribosyltransferase (EC 2.4.2.10)                                                      | 6   | 4  | <b>10</b>  | 1.5     | 0  | 10  | 0     | 0 |
| rrnAC2830                                          | > 2 unique peptides | <i>rpoE''</i>    | DNA-directed RNA polymerase subunit E''                                                              | 3   | 2  | <b>5</b>   | 1.5     | 0  | 5   | 0     | 0 |
| rrnAC1776                                          | > 2 unique peptides | <i>dcd</i>       | Probable deoxycytidine triphosphate deaminase (EC 3.5.4.13) (dCTPdeaminase)                          | 3   | 2  | <b>5</b>   | 1.5     | 0  | 5   | 0     | 0 |
| rrnAC3471                                          | > 2 unique peptides | <i>pyrG</i>      | CTP synthase (EC 6.3.4.2) (UTP--ammonia ligase) (CTP synthetase)                                     | 24  | 17 | <b>41</b>  | 1.41    | 0  | 41  | 0     | 0 |
| rrnAC2429                                          | > 2 unique peptides | <i>rpoB</i>      | DNA-directed RNA polymerase beta subunit (EC 2.7.7.6)                                                | 56  | 40 | <b>96</b>  | 1.4     | 3  | 93  | 3.13  | 0 |

|                                                                          |                     |                  |                                                                                      |     |    |            |         |     |     |       |   |
|--------------------------------------------------------------------------|---------------------|------------------|--------------------------------------------------------------------------------------|-----|----|------------|---------|-----|-----|-------|---|
| rrnAC2427                                                                | > 2 unique peptides | <i>rpoC</i>      | RNA polymerase Rpb1 domain 5 (EC 2.7.7.6)                                            | 22  | 16 | <b>38</b>  | 1.38    | 13  | 25  | 34.21 | 0 |
| rrnAC3174                                                                | > 2 unique peptides | <i>pyrH</i>      | Probable uridylylase (EC 2.7.4.-)                                                    | 4   | 3  | <b>7</b>   | 1.33    | 0   | 7   | 0     | 0 |
| rrnAC0927                                                                | > 2 unique peptides | <i>pyrE2</i>     | Orotate phosphoribosyltransferase (EC 2.4.2.10)                                      | 15  | 12 | <b>27</b>  | 1.25    | 2   | 25  | 7.41  | 0 |
| rrnAC1622                                                                | > 2 unique peptides | <i>nrda</i>      | Ribonucleoside-diphosphate reductase alpha chain(EC 1.17.4.1)                        | 108 | 91 | <b>199</b> | 1.19    | 5   | 194 | 2.51  | 0 |
| rrnAC0259                                                                | > 2 unique peptides | <i>rpb4</i>      | RNA polymerase Rpb4                                                                  | 20  | 17 | <b>37</b>  | 1.18    | 1   | 36  | 2.7   | 0 |
| rrnAC2232                                                                | > 2 unique peptides | <i>pyrC</i>      | Dihydroorotase (EC 3.5.2.3)                                                          | 6   | 6  | <b>12</b>  | 1       | 0   | 12  | 0     | 0 |
| rrnAC1396                                                                | > 2 unique peptides | <i>rpoL</i>      | DNA-directed RNA polymerase subunit L (EC 2.7.7.6)                                   | 4   | 4  | <b>8</b>   | 1       | 0   | 8   | 0     | 0 |
| rrnAC0448                                                                | > 2 unique peptides | <i>udp2</i>      | Uridine phosphorylase (EC 2.4.2.3)                                                   | 15  | 15 | <b>30</b>  | 1       | 0   | 30  | 0     | 0 |
| rrnAC1225                                                                | > 2 unique peptides | <i>pyrB</i>      | Aspartate carbamoyltransferase (EC 2.1.3.2) (Aspartatetranscarbamylase) (ATCase)     | 33  | 34 | <b>67</b>  | 0.97    | 6   | 61  | 8.96  | 0 |
| rrnAC0106                                                                | > 2 unique peptides | <i>ndk</i>       | Nucleoside diphosphate kinase (EC 2.7.4.6) (NDK) (NDP kinase)(Nucleoside-2-P kinase) | 17  | 22 | <b>39</b>  | 0.77    | 0   | 39  | 0     | 0 |
| rrnAC0514                                                                | > 2 unique peptides | <i>surE</i>      | 5'-nucleotidase surE (EC 3.1.3.5) (Nucleoside 5'-monophosphatephosphohydrolase)      | 3   | 4  | <b>7</b>   | 0.75    | 0   | 7   | 0     | 0 |
| rrnAC0062                                                                | > 2 unique peptides | <i>rpoD</i>      | DNA-directed RNA polymerase subunit D (EC 2.7.7.6)                                   | 4   | 7  | <b>11</b>  | 0.57    | 0   | 11  | 0     | 0 |
| rrnAC1224                                                                | > 2 unique peptides | <i>pyrI</i>      | Aspartate carbamoyltransferase regulatory chain                                      | 3   | 6  | <b>9</b>   | 0.5     | 0   | 9   | 0     | 0 |
| rrnAC1831                                                                | > 2 unique peptides | <i>polB1</i>     | DNA polymerase B elongation subunit (EC 2.7.7.7)                                     | 1   | 2  | <b>3</b>   | 0.5     | 0   | 3   | 0     | 0 |
| rrnAC1515                                                                | > 2 unique peptides | <i>pyrF</i>      | Orotidine 5'-phosphate decarboxylase (EC 4.1.1.23)                                   | 2   | 7  | <b>9</b>   | 0.29    | 0   | 9   | 0     | 0 |
| rrnAC1129                                                                | > 2 unique peptides | <i>trxB3</i>     | Thioredoxin reductase (EC 1.8.1.9)                                                   | 1   | 6  | <b>7</b>   | 0.17    | 0   | 7   | 0     | 0 |
| rrnAC2670                                                                | single hit          | <i>ort</i>       | Orotate phosphoribosyltransferase (EC 2.4.2.10)                                      | 1   | 0  | <b>1</b>   | #DIV/0! | 0   | 1   | 0     | 0 |
| rrnAC1470                                                                | single hit          | <i>trxB2</i>     | Thioredoxin reductase (EC 1.8.1.9)                                                   | 1   | 0  | <b>1</b>   | #DIV/0! | 0   | 1   | 0     | 0 |
| rrnAC0446                                                                | single hit          | <i>cdd</i>       | Cytidine deaminase (EC 3.5.4.5)                                                      | 3   | 3  | <b>6</b>   | 1       | 0   | 6   | 0     | 0 |
| rrnAC3286                                                                | single hit          | <i>tmk</i>       | Probable thymidylate kinase (EC 2.7.4.9) (dTMP kinase)                               | 1   | 1  | <b>2</b>   | 1       | 0   | 2   | 0     | 0 |
| rrnAC0218                                                                | single hit          | <i>rpoM</i>      | DNA-directed RNA-polymerase subunit M                                                | 0   | 1  | <b>1</b>   | 0       | 0   | 1   | 0     | 0 |
| pNG7248                                                                  | single hit          | <i>amaB</i>      | N-carbamoyl-L-amino acid amidohydrolase (EC 3.5.1.-)                                 | 0   | 1  | <b>1</b>   | 0       | 0   | 1   | 0     | 0 |
| pNG7078                                                                  | single hit          | <i>trxB1</i>     | Thioredoxin reductase (EC 1.8.1.9)                                                   | 0   | 2  | <b>2</b>   | 0       | 0   | 2   | 0     | 0 |
| pNG7258                                                                  | ND                  |                  |                                                                                      |     |    |            |         |     |     |       |   |
| rrnAC0068                                                                | ND                  |                  |                                                                                      |     |    |            |         |     |     |       |   |
| rrnAC0313                                                                | ND                  |                  |                                                                                      |     |    |            |         |     |     |       |   |
| rrnAC1668                                                                | ND                  |                  |                                                                                      |     |    |            |         |     |     |       |   |
| pNG6176                                                                  | ND                  |                  |                                                                                      |     |    |            |         |     |     |       |   |
| rrnAC2714                                                                | ND                  |                  |                                                                                      |     |    |            |         |     |     |       |   |
| rrnAC0052                                                                | ND                  |                  |                                                                                      |     |    |            |         |     |     |       |   |
| rrnAC0282                                                                | ND                  |                  |                                                                                      |     |    |            |         |     |     |       |   |
| rrnAC0894                                                                | ND                  |                  |                                                                                      |     |    |            |         |     |     |       |   |
| <b>01105 Amino Acid Metabolism</b>                                       |                     |                  |                                                                                      |     |    |            |         |     |     |       |   |
| <b>00250 Alanine, aspartate and glutamate metabolism [PATH:hma00250]</b> |                     |                  |                                                                                      |     |    |            |         |     |     |       |   |
| rrnB0219                                                                 | > 2 unique peptides | <i>gabD</i>      | Succinate-semialdehyde dehydrogenase                                                 | 9   | 1  | <b>10</b>  | 9       | 0   | 10  | 0     | 0 |
| rrnB0206                                                                 | > 2 unique peptides | <i>aspC1</i>     | Aspartate aminotransferase (EC 2.6.1.1)                                              | 28  | 6  | <b>34</b>  | 4.67    | 4   | 30  | 11.76 | 0 |
| rrnAC0797                                                                | > 2 unique peptides | <i>purF</i>      | Amidophosphoribosyl transferase (EC 2.4.2.14)                                        | 3   | 1  | <b>4</b>   | 3       | 0   | 4   | 0     | 0 |
| rrnAC3363                                                                | > 2 unique peptides | <i>carA</i>      | Carbamoyl-phosphate synthase small chain (EC 6.3.5.5)                                | 10  | 5  | <b>15</b>  | 2       | 0   | 15  | 0     | 0 |
| rrnAC3360                                                                | > 2 unique peptides | <i>carB</i>      | Carbamoylphosphate synthetase large subunit (EC 6.3.5.5)                             | 17  | 9  | <b>26</b>  | 1.89    | 0   | 26  | 0     | 0 |
| rrnAC0384                                                                | > 2 unique peptides | <i>gdhA1</i>     | NADP-specific glutamate dehydrogenase (EC 1.4.1.3)                                   | 76  | 51 | <b>127</b> | 1.49    | 25  | 102 | 19.69 | 0 |
| rrnAC3495                                                                | > 2 unique peptides | <i>aspB2</i>     | Aspartate aminotransferase (EC 2.6.1.1)                                              | 26  | 20 | <b>46</b>  | 1.3     | 1   | 45  | 2.17  | 0 |
| rrnAC2780                                                                | > 2 unique peptides | <i>glnA</i>      | Glutamine synthetase (EC 6.3.1.2)                                                    | 99  | 83 | <b>182</b> | 1.19    | 18  | 164 | 9.89  | 0 |
| pNG7157                                                                  | > 2 unique peptides | <i>gudB</i>      | NAD(P)-specific glutamate dehydrogenase (EC 1.4.1.3)                                 | 76  | 75 | <b>151</b> | 1.01    | 19  | 132 | 12.58 | 0 |
| rrnAC0192                                                                | > 2 unique peptides | <i>purB</i>      | Adenylosuccinate lyase (EC 4.3.2.2)                                                  | 11  | 11 | <b>22</b>  | 1       | 0   | 22  | 0     | 0 |
| rrnAC1225                                                                | > 2 unique peptides | <i>pyrB</i>      | Aspartate carbamoyltransferase (EC 2.1.3.2) (Aspartatetranscarbamylase) (ATCase)     | 33  | 34 | <b>67</b>  | 0.97    | 6   | 61  | 8.96  | 0 |
| rrnAC1283                                                                | > 2 unique peptides | <i>purA</i>      | Adenylosuccinate synthetase (EC 6.3.4.4) (IMP--aspartate ligase)(AdSS) (AMPSase)     | 48  | 50 | <b>98</b>  | 0.96    | 1   | 97  | 1.02  | 0 |
| rrnAC2683                                                                | > 2 unique peptides | <i>argG</i>      | Argininosuccinate synthase (EC 6.3.4.5) (Citrulline--aspartateligase)                | 20  | 22 | <b>42</b>  | 0.91    | 0   | 42  | 0     | 0 |
| rrnAC0382                                                                | > 2 unique peptides | <i>gabT</i>      | 4-aminobutyrate aminotransferase                                                     | 66  | 79 | <b>145</b> | 0.84    | 8   | 137 | 5.52  | 0 |
| rrnAC0775                                                                | > 2 unique peptides | <i>gdhA2</i>     | NAD(P)-specific glutamate dehydrogenase (EC 1.4.1.3)                                 | 52  | 64 | <b>116</b> | 0.81    | 1   | 115 | 0.86  | 0 |
| rrnAC1224                                                                | > 2 unique peptides | <i>pyrI</i>      | Aspartate carbamoyltransferase regulatory chain                                      | 3   | 6  | <b>9</b>   | 0.5     | 0   | 9   | 0     | 0 |
| rrnAC1434                                                                | > 2 unique peptides | <i>aspC3</i>     | Aspartate aminotransferase (EC 2.6.1.1)                                              | 10  | 31 | <b>41</b>  | 0.32    | 0   | 41  | 0     | 0 |
| rrnAC2681                                                                | single hit          | <i>argH</i>      | Argininosuccinate lyase (EC 4.3.2.1) (Argininosuccinase) (ASAL)                      | 1   | 0  | <b>1</b>   | #DIV/0! | 0   | 1   | 0     | 0 |
| rrnAC0169                                                                | single hit          | <i>gltB</i>      | Glutamate synthase large subunit (EC 1.4.1.13)                                       | 1   | 0  | <b>1</b>   | #DIV/0! | 0   | 1   | 0     | 0 |
| rrnAC3409                                                                | ND                  |                  |                                                                                      |     |    |            |         |     |     |       |   |
| rrnAC3420                                                                | ND                  |                  |                                                                                      |     |    |            |         |     |     |       |   |
| rrnAC1359                                                                | ND                  |                  |                                                                                      |     |    |            |         |     |     |       |   |
| rrnAC0884                                                                | ND                  |                  |                                                                                      |     |    |            |         |     |     |       |   |
| rrnAC1587                                                                | ND                  |                  |                                                                                      |     |    |            |         |     |     |       |   |
| rrnAC3235                                                                | ND                  |                  |                                                                                      |     |    |            |         |     |     |       |   |
| <b>00260 Glycine, serine and threonine metabolism [PATH:hma00260]</b>    |                     |                  |                                                                                      |     |    |            |         |     |     |       |   |
| rrnAC1884                                                                | > 2 unique peptides | <i>trpA</i>      | Tryptophan synthase alpha chain (EC 4.2.1.20)                                        | 5   | 1  | <b>6</b>   | 5       | 0   | 6   | 0     | 0 |
| rrnAC2717                                                                | > 2 unique peptides | <i>serB1</i>     | Phosphoserine phosphatase (EC 3.1.3.3)                                               | 3   | 1  | <b>4</b>   | 3       | 0   | 4   | 0     | 0 |
| rrnAC2667                                                                | > 2 unique peptides | <i>thrC3</i>     | Threonine synthase                                                                   | 75  | 38 | <b>113</b> | 1.97    | 106 | 7   | 93.81 | 0 |
| rrnAC0365                                                                | > 2 unique peptides | <i>asd</i>       | Aspartate-semialdehyde dehydrogenase (EC 1.2.1.11)                                   | 14  | 9  | <b>23</b>  | 1.56    | 0   | 23  | 0     | 0 |
| rrnAC2408                                                                | > 2 unique peptides | <i>hom</i>       | Homoserine dehydrogenase (EC 1.1.1.3)                                                | 15  | 10 | <b>25</b>  | 1.5     | 0   | 25  | 0     | 0 |
| rrnAC1820                                                                | > 2 unique peptides | <i>rrnAC1820</i> | Hypothetical protein                                                                 | 44  | 33 | <b>77</b>  | 1.33    | 0   | 77  | 0     | 0 |
| rrnAC1497                                                                | > 2 unique peptides | <i>nifS</i>      | Selenocysteine lyase (EC 4.4.1.16)                                                   | 14  | 11 | <b>25</b>  | 1.27    | 0   | 25  | 0     | 0 |
| rrnAC0999                                                                | > 2 unique peptides | <i>glyA</i>      | Serine hydroxymethyltransferase (EC 2.1.2.1) (Serine methylase)(SHMT)                | 20  | 16 | <b>36</b>  | 1.25    | 0   | 36  | 0     | 0 |
| rrnAC1231                                                                | > 2 unique peptides | <i>ilvA1</i>     | Threonine dehydratase (EC 4.3.1.19)                                                  | 12  | 10 | <b>22</b>  | 1.2     | 5   | 17  | 22.73 | 0 |
| rrnAC2663                                                                | > 2 unique peptides | <i>lysC</i>      | Aspartokinase (EC 2.7.2.4)                                                           | 14  | 12 | <b>26</b>  | 1.17    | 0   | 26  | 0     | 0 |

|                                                                         |                     |              |                                                                                                  |     |     |     |         |    |     |       |   |
|-------------------------------------------------------------------------|---------------------|--------------|--------------------------------------------------------------------------------------------------|-----|-----|-----|---------|----|-----|-------|---|
| rrnAC3348                                                               | > 2 unique peptides | <i>thrB</i>  | Homoserine kinase (EC 2.7.1.39) (HSK) (HK)                                                       | 2   | 2   | 4   | 1       | 0  | 4   | 0     | 0 |
| rrnAC3381                                                               | > 2 unique peptides | <i>lpdA1</i> | Dihydrolipoamide dehydrogenase (EC 1.8.1.4)                                                      | 5   | 5   | 10  | 1       | 0  | 10  | 0     | 0 |
| rrnB0197                                                                | > 2 unique peptides | <i>lpdA2</i> | Dihydrolipoyl dehydrogenase 2 (EC 1.8.1.4) (Dihydrolipoamidedehydrogenase 2)                     | 3   | 3   | 6   | 1       | 0  | 6   | 0     | 0 |
| rrnAC2953                                                               | > 2 unique peptides | <i>lpdA2</i> | Dihydrolipoyl dehydrogenase 2 (EC 1.8.1.4) (Dihydrolipoamidedehydrogenase 2)                     | 30  | 37  | 67  | 0.81    | 0  | 67  | 0     | 0 |
| rrnAC2056                                                               | > 2 unique peptides | <i>serA3</i> | D-3-phosphoglycerate dehydrogenase (EC 1.1.1.95)                                                 | 3   | 4   | 7   | 0.75    | 0  | 7   | 0     | 0 |
| rrnAC2696                                                               | > 2 unique peptides | <i>serA1</i> | D-3-phosphoglycerate dehydrogenase (EC 1.1.1.95)                                                 | 17  | 26  | 43  | 0.65    | 0  | 43  | 0     | 0 |
| rrnAC3505                                                               | > 2 unique peptides | <i>thrC1</i> | Threonine synthase (EC 4.2.3.1)                                                                  | 5   | 10  | 15  | 0.5     | 0  | 15  | 0     | 0 |
| rrnAC1498                                                               | > 2 unique peptides | <i>gcvP1</i> | Glycine dehydrogenase subunit 1 (EC 1.4.4.2)                                                     | 2   | 5   | 7   | 0.4     | 0  | 7   | 0     | 0 |
| rrnAC1500                                                               | > 2 unique peptides | <i>gcvT</i>  | Probable aminomethyltransferase (EC 2.1.2.10) (Glycine cleavage systemT protein)                 | 1   | 3   | 4   | 0.33    | 0  | 4   | 0     | 0 |
| rrnAC2508                                                               | > 2 unique peptides | <i>ilvA2</i> | Threonine dehydratase (EC 4.3.1.19)                                                              | 1   | 3   | 4   | 0.33    | 0  | 4   | 0     | 0 |
| pNG7361                                                                 | > 2 unique peptides | <i>gcvT5</i> | Probable aminomethyltransferase (EC 2.1.2.10)                                                    | 32  | 104 | 136 | 0.31    | 5  | 131 | 3.68  | 0 |
| pNG7366                                                                 | > 2 unique peptides | <i>gcvT3</i> | Sacrosine dehydrogenase/glycine cleavage T-protein (EC 1.5.3.1)(EC 2.1.2.10)                     | 9   | 40  | 49  | 0.23    | 0  | 49  | 0     | 0 |
| pNG7370                                                                 | > 2 unique peptides | <i>gcvT1</i> | Sacrosine dehydrogenase/glycine cleavage T-protein (EC 1.5.3.1)(EC 2.1.2.10)                     | 0   | 9   | 9   | 0       | 1  | 8   | 11.11 | 0 |
| rrnAC0788                                                               | single hit          | <i>pssA</i>  | CDP-diacylglycerol-serine O phosphatidyltransferase                                              | 1   | 0   | 1   | #DIV/0! | 1  | 0   | 100   | 5 |
| rrnAC1762                                                               | single hit          | <i>serA2</i> | D-3-phosphoglycerate dehydrogenase (EC 1.1.1.95)                                                 | 0   | 2   | 2   | 0       | 0  | 2   | 0     | 0 |
| pNG7257                                                                 | ND                  |              |                                                                                                  |     |     |     |         |    |     |       |   |
| rrnAC2515                                                               | ND                  |              |                                                                                                  |     |     |     |         |    |     |       |   |
| pNG7333                                                                 | ND                  |              |                                                                                                  |     |     |     |         |    |     |       |   |
| rrnAC0362                                                               | ND                  |              |                                                                                                  |     |     |     |         |    |     |       |   |
| rrnAC2451                                                               | ND                  |              |                                                                                                  |     |     |     |         |    |     |       |   |
| pNG7015                                                                 | ND                  |              |                                                                                                  |     |     |     |         |    |     |       |   |
| rrnAC2552                                                               | ND                  |              |                                                                                                  |     |     |     |         |    |     |       |   |
| rrnAC1865                                                               | ND                  |              |                                                                                                  |     |     |     |         |    |     |       |   |
| pNG7371                                                                 | ND                  |              |                                                                                                  |     |     |     |         |    |     |       |   |
| rrnAC1885                                                               | ND                  |              |                                                                                                  |     |     |     |         |    |     |       |   |
| <b>00270 Cysteine and methionine metabolism [PATH:hma00270]</b>         |                     |              |                                                                                                  |     |     |     |         |    |     |       |   |
| rrnB0206                                                                | > 2 unique peptides | <i>aspC1</i> | Aspartate aminotransferase (EC 2.6.1.1)                                                          | 28  | 6   | 34  | 4.67    | 4  | 30  | 11.76 | 0 |
| rrnAC0365                                                               | > 2 unique peptides | <i>asd</i>   | Aspartate-semialdehyde dehydrogenase (EC 1.2.1.11)                                               | 14  | 9   | 23  | 1.56    | 0  | 23  | 0     | 0 |
| rrnAC2408                                                               | > 2 unique peptides | <i>hom</i>   | Homoserine dehydrogenase (EC 1.1.1.3)                                                            | 15  | 10  | 25  | 1.5     | 0  | 25  | 0     | 0 |
| rrnAC2840                                                               | > 2 unique peptides | <i>ahcY</i>  | Adenosylhomocysteinase (EC 3.3.1.1) (AdoHcyase) (S-adenosyl-L-homocysteine hydrolase)            | 15  | 11  | 26  | 1.36    | 0  | 26  | 0     | 0 |
| rrnAC3495                                                               | > 2 unique peptides | <i>aspB2</i> | Aspartate aminotransferase (EC 2.6.1.1)                                                          | 26  | 20  | 46  | 1.3     | 1  | 45  | 2.17  | 0 |
| rrnAC1233                                                               | > 2 unique peptides | <i>mat</i>   | S-adenosylmethionine synthetase (EC 2.5.1.6) (Methionineadenosyltransferase) (AdoMet synthetase) | 10  | 8   | 18  | 1.25    | 0  | 18  | 0     | 0 |
| rrnAC2663                                                               | > 2 unique peptides | <i>lysC</i>  | Aspartokinase (EC 2.7.2.4)                                                                       | 14  | 12  | 26  | 1.17    | 0  | 26  | 0     | 0 |
| rrnAC2716                                                               | > 2 unique peptides | <i>cysD</i>  | O-acetylhomoserine (Thiol)-lyase (EC 2.5.1.49)                                                   | 31  | 42  | 73  | 0.74    | 5  | 68  | 6.85  | 0 |
| rrnAC1236                                                               | > 2 unique peptides | <i>cysK1</i> | Cysteine synthase (EC 2.5.1.47)                                                                  | 2   | 3   | 5   | 0.67    | 0  | 5   | 0     | 0 |
| rrnAC2414                                                               | > 2 unique peptides | <i>metB</i>  | Cystathionine gamma-synthase (EC 2.5.1.48)                                                       | 30  | 46  | 76  | 0.65    | 1  | 75  | 1.32  | 0 |
| rrnAC1434                                                               | > 2 unique peptides | <i>aspC3</i> | Aspartate aminotransferase (EC 2.6.1.1)                                                          | 10  | 31  | 41  | 0.32    | 0  | 41  | 0     | 0 |
| pNG7330                                                                 | single hit          | <i>cysE1</i> | Serine acetyltransferase (EC 2.3.1.30)                                                           | 1   | 0   | 1   | #DIV/0! | 0  | 1   | 0     | 0 |
| rrnAC0254                                                               | single hit          | <i>metE</i>  | 5-methyltetrahydropteroyltrimethylglutamate-homocysteine methyltransferase(EC 2.1.1.14)          | 2   | 0   | 2   | #DIV/0! | 0  | 2   | 0     | 0 |
| rrnAC1087                                                               | ND                  |              |                                                                                                  |     |     |     |         |    |     |       |   |
| rrnAC0137                                                               | ND                  |              |                                                                                                  |     |     |     |         |    |     |       |   |
| rrnAC0255                                                               | ND                  |              |                                                                                                  |     |     |     |         |    |     |       |   |
| rrnB0070                                                                | ND                  |              |                                                                                                  |     |     |     |         |    |     |       |   |
| rrnAC3064                                                               | ND                  |              |                                                                                                  |     |     |     |         |    |     |       |   |
| rrnAC3063                                                               | ND                  |              |                                                                                                  |     |     |     |         |    |     |       |   |
| <b>00280 Valine, leucine and isoleucine degradation [PATH:hma00280]</b> |                     |              |                                                                                                  |     |     |     |         |    |     |       |   |
| rrnAC3497                                                               | > 2 unique peptides | <i>yqeF</i>  | Acetyl-coA acetyltransferase (EC 2.3.1.9)                                                        | 3   | 1   | 4   | 3       | 0  | 4   | 0     | 0 |
| rrnB0254                                                                | > 2 unique peptides | <i>ech6</i>  | Enoyl-CoA hydratase (EC 4.2.1.17)                                                                | 6   | 3   | 9   | 2       | 0  | 9   | 0     | 0 |
| rrnB0261                                                                | > 2 unique peptides | <i>pccB</i>  | Propionyl-CoA carboxylase beta subunit                                                           | 40  | 20  | 60  | 2       | 0  | 60  | 0     | 0 |
| rrnAC0637                                                               | > 2 unique peptides | <i>mcmA1</i> | Methylmalonyl-CoA mutase subunit alpha                                                           | 4   | 2   | 6   | 2       | 0  | 6   | 0     | 0 |
| rrnAC0896                                                               | > 2 unique peptides | <i>acaB3</i> | 3-ketoacyl-CoA thiolase (EC 2.3.1.9)                                                             | 30  | 16  | 46  | 1.88    | 0  | 46  | 0     | 0 |
| rrnB0242                                                                | > 2 unique peptides | <i>acaB2</i> | 3-ketoacyl-CoA thiolase (EC 2.3.1.9) (EC 2.3.1.16)                                               | 7   | 5   | 12  | 1.4     | 0  | 12  | 0     | 0 |
| rrnB0240                                                                | > 2 unique peptides | <i>aca1</i>  | Acetyl-coA acetyltransferase (EC 2.3.1.9)                                                        | 31  | 25  | 56  | 1.24    | 2  | 54  | 3.57  | 0 |
| rrnB0264                                                                | > 2 unique peptides | <i>acdH</i>  | Acyl-CoA dehydrogenase (EC 1.3.99.3)                                                             | 37  | 31  | 68  | 1.19    | 0  | 68  | 0     | 0 |
| rrnAC2957                                                               | > 2 unique peptides | <i>pdhA3</i> | Pyruvate dehydrogenase E1 component alpha subunit (EC 1.2.4.1)(EC 1.2.4.4)                       | 31  | 27  | 58  | 1.15    | 0  | 58  | 0     | 0 |
| rrnAC2815                                                               | > 2 unique peptides | <i>aca2</i>  | Acetyl-coA acetyltransferase (EC 2.3.1.9)                                                        | 57  | 51  | 108 | 1.12    | 2  | 106 | 1.85  | 0 |
| rrnAC3381                                                               | > 2 unique peptides | <i>lpdA1</i> | Dihydrolipoamide dehydrogenase (EC 1.8.1.4)                                                      | 5   | 5   | 10  | 1       | 0  | 10  | 0     | 0 |
| rrnB0197                                                                | > 2 unique peptides | <i>lpdA2</i> | Dihydrolipoyl dehydrogenase 2 (EC 1.8.1.4) (Dihydrolipoamidedehydrogenase 2)                     | 3   | 3   | 6   | 1       | 0  | 6   | 0     | 0 |
| rrnAC1979                                                               | > 2 unique peptides | <i>ech5</i>  | Enoyl-CoA hydratase/isomerase (EC 4.2.1.17)                                                      | 4   | 4   | 8   | 1       | 0  | 8   | 0     | 0 |
| rrnB0309                                                                | > 2 unique peptides | <i>acaB1</i> | 3-ketoacyl-CoA thiolase (EC 2.3.1.9)                                                             | 2   | 2   | 4   | 1       | 0  | 4   | 0     | 0 |
| rrnAC1083                                                               | > 2 unique peptides | <i>hbd1</i>  | 3-hydroxyacyl-CoA dehydrogenase (EC 1.1.1.35) (EC 4.2.1.17)                                      | 122 | 136 | 258 | 0.9     | 6  | 252 | 2.33  | 0 |
| rrnAC2953                                                               | > 2 unique peptides | <i>lpdA2</i> | Dihydrolipoyl dehydrogenase 2 (EC 1.8.1.4) (Dihydrolipoamidedehydrogenase 2)                     | 30  | 37  | 67  | 0.81    | 0  | 67  | 0     | 0 |
| rrnAC1982                                                               | > 2 unique peptides | <i>hbd2</i>  | 3-hydroxybutyryl-CoA dehydrogenase (EC 1.1.1.35) (EC 4.2.1.17)                                   | 17  | 22  | 39  | 0.77    | 0  | 39  | 0     | 0 |
| rrnB0246                                                                | > 2 unique peptides | <i>aldY5</i> | Aldehyde dehydrogenase (EC 1.2.1.3)                                                              | 47  | 62  | 109 | 0.76    | 1  | 108 | 0.92  | 0 |
| rrnAC1983                                                               | > 2 unique peptides | <i>acd1</i>  | Acyl-CoA dehydrogenase (EC 1.3.99.3)                                                             | 4   | 6   | 10  | 0.67    | 0  | 10  | 0     | 0 |
| rrnB0238                                                                | > 2 unique peptides | <i>hbd3</i>  | 3-hydroxyacyl-CoA dehydrogenase (EC 1.1.1.35)                                                    | 9   | 14  | 23  | 0.64    | 4  | 19  | 17.39 | 0 |
| rrnAC0934                                                               | > 2 unique peptides | <i>mcmA3</i> | Putative methylmalonyl-CoA mutase                                                                | 5   | 8   | 13  | 0.63    | 0  | 13  | 0     | 0 |
| rrnAC3036                                                               | > 2 unique peptides | <i>aldY3</i> | Aldehyde dehydrogenase                                                                           | 10  | 16  | 26  | 0.63    | 0  | 26  | 0     | 0 |
| rrnAC2473                                                               | > 2 unique peptides | <i>aldY2</i> | Aldehyde dehydrogenase (EC 1.2.1.3)                                                              | 83  | 140 | 223 | 0.59    | 17 | 206 | 7.62  | 0 |
| rrnAC3071                                                               | > 2 unique peptides | <i>ilvE1</i> | Branched-chain amino acid aminotransferase                                                       | 20  | 35  | 55  | 0.57    | 0  | 55  | 0     | 0 |



|                                                                          |                     |                  |                                                                                                                                        |    |    |            |         |    |     |       |   |
|--------------------------------------------------------------------------|---------------------|------------------|----------------------------------------------------------------------------------------------------------------------------------------|----|----|------------|---------|----|-----|-------|---|
| rrnAC0833                                                                | > 2 unique peptides | <i>ech2</i>      | Enoyl-CoA hydratase (EC 4.2.1.17)                                                                                                      | 13 | 23 | <b>36</b>  | 0.57    | 3  | 33  | 8.33  | 0 |
| rrnAC0771                                                                | > 2 unique peptides | <i>paaH</i>      | 3-hydroxybutyryl-CoA dehydrogenase (EC 1.1.1.35)                                                                                       | 31 | 58 | <b>89</b>  | 0.53    | 0  | 89  | 0     | 0 |
| rrnAC2484                                                                | > 2 unique peptides | <i>ech3</i>      | Enoyl-CoA hydratase (EC 4.2.1.17)                                                                                                      | 2  | 4  | <b>6</b>   | 0.5     | 0  | 6   | 0     | 0 |
| rrnAC0264                                                                | > 2 unique peptides | <i>hbd-1</i>     | 3-hydroxyacyl-CoA dehydrogenase (EC 1.1.1.35)                                                                                          | 2  | 4  | <b>6</b>   | 0.5     | 0  | 6   | 0     | 0 |
| rrnAC1973                                                                | > 2 unique peptides | <i>aldY4</i>     | Aldehyde dehydrogenase (EC 1.2.1.3)                                                                                                    | 21 | 42 | <b>63</b>  | 0.5     | 1  | 62  | 1.59  | 0 |
| rrnAC0201                                                                | > 2 unique peptides | <i>aldY2</i>     | Aldehyde dehydrogenase (EC 1.2.1.3)                                                                                                    | 39 | 94 | <b>133</b> | 0.41    | 12 | 121 | 9.02  | 0 |
| rrnB0237                                                                 | > 2 unique peptides | <i>ech4</i>      | Enoyl-CoA hydratase (EC 4.2.1.17)                                                                                                      | 1  | 6  | <b>7</b>   | 0.17    | 0  | 7   | 0     | 0 |
| rrnAC0929                                                                | > 2 unique peptides | <i>acaB4</i>     | 3-ketoacyl-CoA thiolase (EC 2.3.1.16)                                                                                                  | 1  | 10 | <b>11</b>  | 0.1     | 0  | 11  | 0     | 0 |
| rrnAC1740                                                                | > 2 unique peptides | <i>mvaS</i>      | Hydroxymethylglutaryl-CoA synthase (EC 2.3.3.10)                                                                                       | 1  | 10 | <b>11</b>  | 0.1     | 0  | 11  | 0     | 0 |
| rrnAC1275                                                                | > 2 unique peptides | <i>mcmA2</i>     | Methylmalonyl-CoA mutase subunit alpha                                                                                                 | 0  | 4  | <b>4</b>   | 0       | 0  | 4   | 0     | 0 |
| rrnAC0711                                                                | ND                  |                  |                                                                                                                                        |    |    |            |         |    |     |       |   |
| rrnAC0149                                                                | ND                  |                  |                                                                                                                                        |    |    |            |         |    |     |       |   |
| pNG7352                                                                  | ND                  |                  |                                                                                                                                        |    |    |            |         |    |     |       |   |
| rrnAC2631                                                                | ND                  |                  |                                                                                                                                        |    |    |            |         |    |     |       |   |
| rrnB0092                                                                 | ND                  |                  |                                                                                                                                        |    |    |            |         |    |     |       |   |
| rrnB0095                                                                 | ND                  |                  |                                                                                                                                        |    |    |            |         |    |     |       |   |
| <b>00290 Valine, leucine and isoleucine biosynthesis [PATH:hma00290]</b> |                     |                  |                                                                                                                                        |    |    |            |         |    |     |       |   |
| rrnAC0331                                                                | > 2 unique peptides | <i>ilvN</i>      | Acetolactate synthase small subunit (EC 2.2.1.6)                                                                                       | 2  | 0  | <b>2</b>   | #DIV/0! | 0  | 2   | 0     | 0 |
| rrnB0199                                                                 | > 2 unique peptides | <i>pdhB2</i>     | Pyruvate dehydrogenase (EC 1.2.4.1)                                                                                                    | 22 | 3  | <b>25</b>  | 7.33    | 5  | 20  | 20    | 0 |
| rrnAC0330                                                                | > 2 unique peptides | <i>ilvB2</i>     | Acetolactate synthase (EC 2.2.1.6)                                                                                                     | 8  | 3  | <b>11</b>  | 2.67    | 4  | 7   | 36.36 | 0 |
| rrnB0209                                                                 | > 2 unique peptides | <i>ilvB3</i>     | Acetolactate synthase large subunit (EC 2.2.1.6)                                                                                       | 7  | 3  | <b>10</b>  | 2.33    | 0  | 10  | 0     | 0 |
| rrnAC0329                                                                | > 2 unique peptides | <i>leuA2</i>     | 2-isopropylmalate synthase 2 (EC 2.3.3.13)                                                                                             | 5  | 3  | <b>8</b>   | 1.67    | 0  | 8   | 0     | 0 |
| rrnAC0332                                                                | > 2 unique peptides | <i>ilvC</i>      | Ketol-acid reductoisomerase (EC 1.1.1.86) (Acetohydroxy-acid isomerase) (Alpha-keto-beta-hydroxylacyl reductoisomerase)                | 8  | 6  | <b>14</b>  | 1.33    | 0  | 14  | 0     | 0 |
| rrnAC1231                                                                | > 2 unique peptides | <i>ilvA1</i>     | Threonine dehydratase (EC 4.3.1.19)                                                                                                    | 12 | 10 | <b>22</b>  | 1.2     | 5  | 17  | 22.73 | 0 |
| rrnAC2957                                                                | > 2 unique peptides | <i>pdhA3</i>     | Pyruvate dehydrogenase E1 component alpha subunit (EC 1.2.4.1)(EC 1.2.4.4)                                                             | 31 | 27 | <b>58</b>  | 1.15    | 0  | 58  | 0     | 0 |
| rrnAC2650                                                                | > 2 unique peptides | <i>leuS1</i>     | Leucyl-tRNA synthetase (EC 6.1.1.4)                                                                                                    | 16 | 14 | <b>30</b>  | 1.14    | 0  | 30  | 0     | 0 |
| rrnAC2956                                                                | > 2 unique peptides | <i>pdhB1</i>     | Pyruvate dehydrogenase (EC 1.2.4.1)                                                                                                    | 59 | 69 | <b>128</b> | 0.86    | 20 | 108 | 15.63 | 0 |
| rrnAC0302                                                                | > 2 unique peptides | <i>ilvD</i>      | Dihydroxy-acid dehydratase (EC 4.2.1.9) (DAD)                                                                                          | 26 | 32 | <b>58</b>  | 0.81    | 0  | 58  | 0     | 0 |
| rrnAC2947                                                                | > 2 unique peptides | <i>leuS2</i>     | Leucyl-tRNA synthetase (EC 6.1.1.4)                                                                                                    | 35 | 46 | <b>81</b>  | 0.76    | 0  | 81  | 0     | 0 |
| rrnAC0336                                                                | > 2 unique peptides | <i>leuD</i>      | 3-isopropylmalate dehydratase small subunit (EC 4.2.1.33)                                                                              | 3  | 4  | <b>7</b>   | 0.75    | 0  | 7   | 0     | 0 |
| rrnAC0134                                                                | > 2 unique peptides | <i>ilvB1</i>     | Acetolactate synthase large subunit (EC 2.2.1.6)                                                                                       | 16 | 22 | <b>38</b>  | 0.73    | 1  | 37  | 2.63  | 0 |
| rrnAC0340                                                                | > 2 unique peptides | <i>ipmD</i>      | 3-isopropylmalate dehydrogenase (EC 1.1.1.85)                                                                                          | 10 | 15 | <b>25</b>  | 0.67    | 0  | 25  | 0     | 0 |
| rrnAC3071                                                                | > 2 unique peptides | <i>ilvE1</i>     | Branched-chain amino acid aminotransferase                                                                                             | 20 | 35 | <b>55</b>  | 0.57    | 0  | 55  | 0     | 0 |
| rrnAC2634                                                                | > 2 unique peptides | <i>ileS</i>      | Isoleucyl-tRNA synthetase (EC 6.1.1.5) (Isoleucine--tRNA ligase)(IleRS)                                                                | 25 | 45 | <b>70</b>  | 0.56    | 0  | 70  | 0     | 0 |
| rrnAC1729                                                                | > 2 unique peptides | <i>valS</i>      | Valyl-tRNA synthetase (EC 6.1.1.9) (Valine--tRNA ligase) (ValRS)                                                                       | 8  | 18 | <b>26</b>  | 0.44    | 0  | 26  | 0     | 0 |
| rrnAC2508                                                                | > 2 unique peptides | <i>ilvA2</i>     | Threonine dehydratase (EC 4.3.1.19)                                                                                                    | 1  | 3  | <b>4</b>   | 0.33    | 0  | 4   | 0     | 0 |
| rrnAC0334                                                                | > 2 unique peptides | <i>leuC</i>      | 3-isopropylmalate dehydratase large subunit (EC 4.2.1.33)(Isopropylmalate isomerase) (Alpha-IPM isomerase) (IPMI)                      | 2  | 9  | <b>11</b>  | 0.22    | 0  | 11  | 0     | 0 |
| rrnAC1690                                                                | single hit          | <i>leuA1</i>     | 2-isopropylmalate synthase 2 (EC 2.3.3.13)                                                                                             | 1  | 0  | <b>1</b>   | #DIV/0! | 0  | 1   | 0     | 0 |
| rrnB0200                                                                 | single hit          | <i>pdhA2</i>     | Pyruvate dehydrogenase E1 component alpha subunit (EC 1.2.4.1)                                                                         | 2  | 2  | <b>4</b>   | 1       | 0  | 4   | 0     | 0 |
| pNG7371                                                                  | ND                  |                  |                                                                                                                                        |    |    |            |         |    |     |       |   |
| rrnAC0711                                                                | ND                  |                  |                                                                                                                                        |    |    |            |         |    |     |       |   |
| rrnAC0149                                                                | ND                  |                  |                                                                                                                                        |    |    |            |         |    |     |       |   |
| <b>00300 Lysine biosynthesis [PATH:hma00300]</b>                         |                     |                  |                                                                                                                                        |    |    |            |         |    |     |       |   |
| rrnAC2679                                                                | > 2 unique peptides | <i>rimK</i>      | Ribosomal protein S6 modification protein                                                                                              | 9  | 1  | <b>10</b>  | 9       | 0  | 10  | 0     | 0 |
| rrnAC2674                                                                | > 2 unique peptides | <i>glcP</i>      | Glutamate carboxypeptidase (EC 3.4.17.11)                                                                                              | 6  | 2  | <b>8</b>   | 3       | 0  | 8   | 0     | 0 |
| rrnAC2678                                                                | > 2 unique peptides | <i>argC</i>      | N-acetyl-gamma-glutamyl-phosphate reductase (EC 1.2.1.38) (AGPR) (N-acetyl-glutamate semialdehyde dehydrogenase) (NAGSA dehydrogenase) | 10 | 4  | <b>14</b>  | 2.5     | 0  | 14  | 0     | 0 |
| rrnAC0132                                                                | > 2 unique peptides | <i>rrnAC0132</i> | Lysine-ketoglutarate reductase/saccharopine dehydrogenase (EC 1.5.1.7)(EC 1.5.1.10)                                                    | 7  | 4  | <b>11</b>  | 1.75    | 0  | 11  | 0     | 0 |
| rrnAC2675                                                                | > 2 unique peptides | <i>argD</i>      | Acetylornithine aminotransferase (EC 2.6.1.11)                                                                                         | 19 | 12 | <b>31</b>  | 1.58    | 0  | 31  | 0     | 0 |
| rrnAC0365                                                                | > 2 unique peptides | <i>asd</i>       | Aspartate-semialdehyde dehydrogenase (EC 1.2.1.11)                                                                                     | 14 | 9  | <b>23</b>  | 1.56    | 0  | 23  | 0     | 0 |
| rrnAC2408                                                                | > 2 unique peptides | <i>hom</i>       | Homoserine dehydrogenase (EC 1.1.1.3)                                                                                                  | 15 | 10 | <b>25</b>  | 1.5     | 0  | 25  | 0     | 0 |
| rrnAC0204                                                                | > 2 unique peptides | <i>dapD</i>      | 2,3,4,5-tetrahydropyridine-2-carboxylate N-succinyltransferase(EC 2.3.1.117)                                                           | 27 | 21 | <b>48</b>  | 1.29    | 0  | 48  | 0     | 0 |
| rrnAC2663                                                                | > 2 unique peptides | <i>lysC</i>      | Aspartokinase (EC 2.7.2.4)                                                                                                             | 14 | 12 | <b>26</b>  | 1.17    | 0  | 26  | 0     | 0 |
| rrnAC0206                                                                | > 2 unique peptides | <i>dapB</i>      | Dihydrodipicolinate reductase (EC 1.3.1.26) (DHPR)                                                                                     | 6  | 6  | <b>12</b>  | 1       | 0  | 12  | 0     | 0 |
| rrnAC0207                                                                | > 2 unique peptides | <i>dapA</i>      | Dihydrodipicolinate synthase (EC 4.2.1.52) (DHDPS)                                                                                     | 9  | 10 | <b>19</b>  | 0.9     | 0  | 19  | 0     | 0 |
| rrnAC2676                                                                | single hit          | <i>argB2</i>     | Acetylglutamate kinase (EC 2.7.2.8)                                                                                                    | 3  | 4  | <b>7</b>   | 0.75    | 0  | 7   | 0     | 0 |
| rrnAC0198                                                                | single hit          | <i>odc</i>       | Diaminopimelate decarboxylase (EC 4.1.1.20)                                                                                            | 0  | 1  | <b>1</b>   | 0       | 0  | 1   | 0     | 0 |
| rrnAC0960                                                                | ND                  |                  |                                                                                                                                        |    |    |            |         |    |     |       |   |
| rrnAC0196                                                                | ND                  |                  |                                                                                                                                        |    |    |            |         |    |     |       |   |
| rrnAC2680                                                                | ND                  |                  |                                                                                                                                        |    |    |            |         |    |     |       |   |
| <b>00310 Lysine degradation [PATH:hma00310]</b>                          |                     |                  |                                                                                                                                        |    |    |            |         |    |     |       |   |
| rrnAC3497                                                                | > 2 unique peptides | <i>yqeF</i>      | Acetyl-coA acetyltransferase (EC 2.3.1.9)                                                                                              | 3  | 1  | <b>4</b>   | 3       | 0  | 4   | 0     | 0 |
| rrnB0254                                                                 | > 2 unique peptides | <i>ech6</i>      | Enoyl-CoA hydratase (EC 4.2.1.17)                                                                                                      | 6  | 3  | <b>9</b>   | 2       | 0  | 9   | 0     | 0 |
| rrnAC0896                                                                | > 2 unique peptides | <i>acaB3</i>     | 3-ketoacyl-CoA thiolase (EC 2.3.1.9)                                                                                                   | 30 | 16 | <b>46</b>  | 1.88    | 0  | 46  | 0     | 0 |
| rrnAC0132                                                                | > 2 unique peptides | <i>rrnAC0132</i> | Lysine-ketoglutarate reductase/saccharopine dehydrogenase (EC 1.5.1.7)(EC 1.5.1.10)                                                    | 7  | 4  | <b>11</b>  | 1.75    | 0  | 11  | 0     | 0 |
| rrnB0242                                                                 | > 2 unique peptides | <i>acaB2</i>     | 3-ketoacyl-CoA thiolase (EC 2.3.1.9) (EC 2.3.1.16)                                                                                     | 7  | 5  | <b>12</b>  | 1.4     | 0  | 12  | 0     | 0 |
| rrnB0240                                                                 | > 2 unique peptides | <i>aca1</i>      | Acetyl-coA acetyltransferase (EC 2.3.1.9)                                                                                              | 31 | 25 | <b>56</b>  | 1.24    | 2  | 54  | 3.57  | 0 |
| rrnAC2815                                                                | > 2 unique peptides | <i>aca2</i>      | Acetyl-coA acetyltransferase (EC 2.3.1.9)                                                                                              | 57 | 51 | <b>108</b> | 1.12    | 2  | 106 | 1.85  | 0 |
| rrnAC1979                                                                | > 2 unique peptides | <i>ech5</i>      | Enoyl-CoA hydratase/isomerase (EC 4.2.1.17)                                                                                            | 4  | 4  | <b>8</b>   | 1       | 0  | 8   | 0     | 0 |

|                                                              |                     |              |                                                                                                                  |     |     |     |         |    |     |       |   |
|--------------------------------------------------------------|---------------------|--------------|------------------------------------------------------------------------------------------------------------------|-----|-----|-----|---------|----|-----|-------|---|
| rrnB0309                                                     | > 2 unique peptides | <i>acaB1</i> | 3-ketoacyl-CoA thiolase (EC 2.3.1.9)                                                                             | 2   | 2   | 4   | 1       | 0  | 4   | 0     | 0 |
| rrnAC1083                                                    | > 2 unique peptides | <i>hbd1</i>  | 3-hydroxyacyl-CoA dehydrogenase (EC 1.1.1.35) (EC 4.2.1.17)                                                      | 122 | 136 | 258 | 0.9     | 6  | 252 | 2.33  | 0 |
| rrnAC1982                                                    | > 2 unique peptides | <i>hbd2</i>  | 3-hydroxybutyryl-CoA dehydrogenase (EC 1.1.1.35) (EC 4.2.1.17)                                                   | 17  | 22  | 39  | 0.77    | 0  | 39  | 0     | 0 |
| rrnB0246                                                     | > 2 unique peptides | <i>aldY5</i> | Aldehyde dehydrogenase (EC 1.2.1.3)                                                                              | 47  | 62  | 109 | 0.76    | 1  | 108 | 0.92  | 0 |
| rrnAC1972                                                    | > 2 unique peptides | <i>gcdH</i>  | Glutaryl-CoA dehydrogenase (EC 1.3.99.7)                                                                         | 46  | 63  | 109 | 0.73    | 3  | 106 | 2.75  | 0 |
| rrnB0238                                                     | > 2 unique peptides | <i>hbd3</i>  | 3-hydroxyacyl-CoA dehydrogenase (EC 1.1.1.35)                                                                    | 9   | 14  | 23  | 0.64    | 4  | 19  | 17.39 | 0 |
| rrnAC3036                                                    | > 2 unique peptides | <i>aldY3</i> | Aldehyde dehydrogenase                                                                                           | 10  | 16  | 26  | 0.63    | 0  | 26  | 0     | 0 |
| rrnAC2473                                                    | > 2 unique peptides | <i>aldY2</i> | Aldehyde dehydrogenase (EC 1.2.1.3)                                                                              | 83  | 140 | 223 | 0.59    | 17 | 206 | 7.62  | 0 |
| rrnAC0833                                                    | > 2 unique peptides | <i>ech2</i>  | Enoyl-CoA hydratase (EC 4.2.1.17)                                                                                | 13  | 23  | 36  | 0.57    | 3  | 33  | 8.33  | 0 |
| rrnAC0771                                                    | > 2 unique peptides | <i>paaH</i>  | 3-hydroxybutyryl-CoA dehydrogenase (EC 1.1.1.35)                                                                 | 31  | 58  | 89  | 0.53    | 0  | 89  | 0     | 0 |
| rrnAC2484                                                    | > 2 unique peptides | <i>ech3</i>  | Enoyl-CoA hydratase (EC 4.2.1.17)                                                                                | 2   | 4   | 6   | 0.5     | 0  | 6   | 0     | 0 |
| rrnAC0264                                                    | > 2 unique peptides | <i>hbd-1</i> | 3-hydroxyacyl-CoA dehydrogenase (EC 1.1.1.35)                                                                    | 2   | 4   | 6   | 0.5     | 0  | 6   | 0     | 0 |
| rrnAC1973                                                    | > 2 unique peptides | <i>aldY4</i> | Aldehyde dehydrogenase (EC 1.2.1.3)                                                                              | 21  | 42  | 63  | 0.5     | 1  | 62  | 1.59  | 0 |
| rrnAC0201                                                    | > 2 unique peptides | <i>aldY2</i> | Aldehyde dehydrogenase (EC 1.2.1.3)                                                                              | 39  | 94  | 133 | 0.41    | 12 | 121 | 9.02  | 0 |
| rrnB0237                                                     | > 2 unique peptides | <i>ech4</i>  | Enoyl-CoA hydratase (EC 4.2.1.17)                                                                                | 1   | 6   | 7   | 0.17    | 0  | 7   | 0     | 0 |
| pNG7352                                                      | ND                  |              |                                                                                                                  |     |     |     |         |    |     |       |   |
| rrnAC2631                                                    | ND                  |              |                                                                                                                  |     |     |     |         |    |     |       |   |
| rrnB0092                                                     | ND                  |              |                                                                                                                  |     |     |     |         |    |     |       |   |
| rrnB0095                                                     | ND                  |              |                                                                                                                  |     |     |     |         |    |     |       |   |
| <b>00330 Arginine and proline metabolism [PATH:hma00330]</b> |                     |              |                                                                                                                  |     |     |     |         |    |     |       |   |
| rrnB0206                                                     | > 2 unique peptides | <i>aspC1</i> | Aspartate aminotransferase (EC 2.6.1.1)                                                                          | 28  | 6   | 34  | 4.67    | 4  | 30  | 11.76 | 0 |
| rrnAC0383                                                    | > 2 unique peptides | <i>arg2</i>  | Arginase (EC 3.5.3.1)                                                                                            | 16  | 4   | 20  | 4       | 0  | 20  | 0     | 0 |
| rrnAC2678                                                    | > 2 unique peptides | <i>argC</i>  | N-acetyl-gamma-glutamyl-phosphate reductase (EC 1.2.1.38) (AGPR) (N-acetyl-glutamate semialdehyde dehydrogenase) | 10  | 4   | 14  | 2.5     | 0  | 14  | 0     | 0 |
| rrnAC0223                                                    | > 2 unique peptides | <i>camH3</i> | Creatinine amidohydrolase (EC 3.5.2.10)                                                                          | 2   | 1   | 3   | 2       | 0  | 3   | 0     | 0 |
| rrnAC2675                                                    | > 2 unique peptides | <i>argD</i>  | Acetylmethionine aminotransferase (EC 2.6.1.11)                                                                  | 19  | 12  | 31  | 1.58    | 0  | 31  | 0     | 0 |
| rrnAC0384                                                    | > 2 unique peptides | <i>gdhA1</i> | NADP-specific glutamate dehydrogenase (EC 1.4.1.3)                                                               | 76  | 51  | 127 | 1.49    | 25 | 102 | 19.69 | 0 |
| rrnAC3495                                                    | > 2 unique peptides | <i>aspB2</i> | Aspartate aminotransferase (EC 2.6.1.1)                                                                          | 26  | 20  | 46  | 1.3     | 1  | 45  | 2.17  | 0 |
| rrnAC2780                                                    | > 2 unique peptides | <i>glnA</i>  | Glutamine synthetase (EC 6.3.1.2)                                                                                | 99  | 83  | 182 | 1.19    | 18 | 164 | 9.89  | 0 |
| pNG7157                                                      | > 2 unique peptides | <i>gudB</i>  | NAD(P)-specific glutamate dehydrogenase (EC 1.4.1.3)                                                             | 76  | 75  | 151 | 1.01    | 19 | 132 | 12.58 | 0 |
| pNG7165                                                      | > 2 unique peptides | <i>hyuB</i>  | N-methylhydantoinase B (EC 3.5.2.9)                                                                              | 4   | 4   | 8   | 1       | 0  | 8   | 0     | 0 |
| rrnAC2683                                                    | > 2 unique peptides | <i>argG</i>  | Argininosuccinate synthase (EC 6.3.4.5) (Citrulline--aspartateligase)                                            | 20  | 22  | 42  | 0.91    | 0  | 42  | 0     | 0 |
| rrnAC2471                                                    | > 2 unique peptides | <i>yusM</i>  | Proline dehydrogenase                                                                                            | 9   | 10  | 19  | 0.9     | 7  | 12  | 36.84 | 0 |
| rrnAC0227                                                    | > 2 unique peptides | <i>ocd3</i>  | Ornithine cyclodeaminase (EC 4.3.1.12)                                                                           | 21  | 24  | 45  | 0.88    | 0  | 45  | 0     | 0 |
| rrnAC3121                                                    | > 2 unique peptides | <i>eda</i>   | 2-dehydro-3-deoxyphosphogluconate aldolase/4-hydroxy-2-oxoglutaratealdolase (EC 4.1.2.14)                        | 14  | 17  | 31  | 0.82    | 0  | 31  | 0     | 0 |
| rrnAC0775                                                    | > 2 unique peptides | <i>gdhA2</i> | NAD(P)-specific glutamate dehydrogenase (EC 1.4.1.3)                                                             | 52  | 64  | 116 | 0.81    | 1  | 115 | 0.86  | 0 |
| rrnB0246                                                     | > 2 unique peptides | <i>aldY5</i> | Aldehyde dehydrogenase (EC 1.2.1.3)                                                                              | 47  | 62  | 109 | 0.76    | 1  | 108 | 0.92  | 0 |
| pNG7164                                                      | > 2 unique peptides | <i>hyuA</i>  | N-methylhydantoinase A (EC 3.5.2.9)                                                                              | 6   | 8   | 14  | 0.75    | 0  | 14  | 0     | 0 |
| rrnAC3036                                                    | > 2 unique peptides | <i>aldY3</i> | Aldehyde dehydrogenase                                                                                           | 10  | 16  | 26  | 0.63    | 0  | 26  | 0     | 0 |
| rrnAC0038                                                    | > 2 unique peptides | <i>ocd1</i>  | Ornithine cyclodeaminase (EC 4.3.1.12)                                                                           | 5   | 8   | 13  | 0.63    | 0  | 13  | 0     | 0 |
| rrnAC2473                                                    | > 2 unique peptides | <i>aldY2</i> | Aldehyde dehydrogenase (EC 1.2.1.3)                                                                              | 83  | 140 | 223 | 0.59    | 17 | 206 | 7.62  | 0 |
| rrnAC1973                                                    | > 2 unique peptides | <i>aldY4</i> | Aldehyde dehydrogenase (EC 1.2.1.3)                                                                              | 21  | 42  | 63  | 0.5     | 1  | 62  | 1.59  | 0 |
| rrnAC0201                                                    | > 2 unique peptides | <i>aldY2</i> | Aldehyde dehydrogenase (EC 1.2.1.3)                                                                              | 39  | 94  | 133 | 0.41    | 12 | 121 | 9.02  | 0 |
| rrnAC1434                                                    | > 2 unique peptides | <i>aspC3</i> | Aspartate aminotransferase (EC 2.6.1.1)                                                                          | 10  | 31  | 41  | 0.32    | 0  | 41  | 0     | 0 |
| rrnAC0453                                                    | > 2 unique peptides | <i>arg1</i>  | Arginase (EC 3.5.3.1)                                                                                            | 0   | 2   | 2   | 0       | 0  | 2   | 0     | 0 |
| rrnAC2470                                                    | single hit          | <i>prp</i>   | Proline racemase (EC 5.1.1.4)                                                                                    | 1   | 0   | 1   | #DIV/0! | 0  | 1   | 0     | 0 |
| rrnAC2681                                                    | single hit          | <i>argH</i>  | Argininosuccinate lyase (EC 4.3.2.1) (Arginosuccinase) (ASAL)                                                    | 1   | 0   | 1   | #DIV/0! | 0  | 1   | 0     | 0 |
| rrnAC2676                                                    | single hit          | <i>argB2</i> | Acetylglutamate kinase (EC 2.7.2.8)                                                                              | 3   | 4   | 7   | 0.75    | 0  | 7   | 0     | 0 |
| rrnAC0198                                                    | single hit          | <i>odc</i>   | Diaminopimelate decarboxylase (EC 4.1.1.20)                                                                      | 0   | 1   | 1   | 0       | 0  | 1   | 0     | 0 |
| pNG7096                                                      | ND                  |              |                                                                                                                  |     |     |     |         |    |     |       |   |
| pNG7341                                                      | ND                  |              |                                                                                                                  |     |     |     |         |    |     |       |   |
| rrnAC3199                                                    | ND                  |              |                                                                                                                  |     |     |     |         |    |     |       |   |
| pNG7067                                                      | ND                  |              |                                                                                                                  |     |     |     |         |    |     |       |   |
| rrnAC1927                                                    | ND                  |              |                                                                                                                  |     |     |     |         |    |     |       |   |
| rrnB0070                                                     | ND                  |              |                                                                                                                  |     |     |     |         |    |     |       |   |
| pNG7352                                                      | ND                  |              |                                                                                                                  |     |     |     |         |    |     |       |   |
| rrnAC2631                                                    | ND                  |              |                                                                                                                  |     |     |     |         |    |     |       |   |
| rrnB0092                                                     | ND                  |              |                                                                                                                  |     |     |     |         |    |     |       |   |
| rrnB0095                                                     | ND                  |              |                                                                                                                  |     |     |     |         |    |     |       |   |
| rrnAC2941                                                    | ND                  |              |                                                                                                                  |     |     |     |         |    |     |       |   |
| pNG7124                                                      | ND                  |              |                                                                                                                  |     |     |     |         |    |     |       |   |
| pNG7123                                                      | ND                  |              |                                                                                                                  |     |     |     |         |    |     |       |   |
| pNG7125                                                      | ND                  |              |                                                                                                                  |     |     |     |         |    |     |       |   |
| rrnAC0884                                                    | ND                  |              |                                                                                                                  |     |     |     |         |    |     |       |   |
| rrnAC2095                                                    | ND                  |              |                                                                                                                  |     |     |     |         |    |     |       |   |
| <b>00340 Histidine metabolism [PATH:hma00340]</b>            |                     |              |                                                                                                                  |     |     |     |         |    |     |       |   |
| rrnAC2371                                                    | > 2 unique peptides | <i>hisE</i>  | Phosphoribosyl-ATP pyrophosphatase (EC 3.6.1.31) (PRA-PH)                                                        | 4   | 1   | 5   | 4       | 0  | 5   | 0     | 0 |
| rrnAC0529                                                    | > 2 unique peptides | <i>hisC</i>  | Histidinol-phosphate aminotransferase (EC 2.6.1.9) (Imidazole acetol-phosphate transaminase)                     | 6   | 7   | 13  | 0.86    | 0  | 13  | 0     | 0 |
| rrnAC1789                                                    | > 2 unique peptides | <i>hutG</i>  | Probable formimidoylglutamate (EC 3.5.3.8)                                                                       | 9   | 11  | 20  | 0.82    | 0  | 20  | 0     | 0 |
| rrnAC0272                                                    | > 2 unique peptides | <i>hisD</i>  | Histidinol dehydrogenase (EC 1.1.1.23) (HDH)                                                                     | 10  | 13  | 23  | 0.77    | 0  | 23  | 0     | 0 |
| rrnB0246                                                     | > 2 unique peptides | <i>aldY5</i> | Aldehyde dehydrogenase (EC 1.2.1.3)                                                                              | 47  | 62  | 109 | 0.76    | 1  | 108 | 0.92  | 0 |

|                                                       |                     |                  |                                                                                                                                                                                         |     |     |     |      |    |     |       |   |
|-------------------------------------------------------|---------------------|------------------|-----------------------------------------------------------------------------------------------------------------------------------------------------------------------------------------|-----|-----|-----|------|----|-----|-------|---|
| rrnAC2835                                             | > 2 unique peptides | <i>hisG</i>      | ATP phosphoribosyltransferase (EC 2.4.2.17) (ATP-PRTase) (ATP-PRT)                                                                                                                      | 7   | 10  | 17  | 0.7  | 0  | 17  | 0     | 0 |
| rrnAC3036                                             | > 2 unique peptides | <i>aldY3</i>     | Aldehyde dehydrogenase                                                                                                                                                                  | 10  | 16  | 26  | 0.63 | 0  | 26  | 0     | 0 |
| rrnAC2473                                             | > 2 unique peptides | <i>aldY2</i>     | Aldehyde dehydrogenase (EC 1.2.1.3)                                                                                                                                                     | 83  | 140 | 223 | 0.59 | 17 | 206 | 7.62  | 0 |
| rrnAC1973                                             | > 2 unique peptides | <i>aldY4</i>     | Aldehyde dehydrogenase (EC 1.2.1.3)                                                                                                                                                     | 21  | 42  | 63  | 0.5  | 1  | 62  | 1.59  | 0 |
| rrnAC1787                                             | > 2 unique peptides | <i>hutU</i>      | Urocanate hydratase (EC 4.2.1.49)                                                                                                                                                       | 57  | 115 | 172 | 0.5  | 13 | 159 | 7.56  | 0 |
| rrnAC1790                                             | > 2 unique peptides | <i>hutI</i>      | Imidazolonepropionase (EC 3.5.2.7)                                                                                                                                                      | 15  | 35  | 50  | 0.43 | 0  | 50  | 0     | 0 |
| rrnAC1791                                             | > 2 unique peptides | <i>hutH</i>      | Histidine ammonia-lyase (EC 4.3.1.3)                                                                                                                                                    | 23  | 55  | 78  | 0.42 | 8  | 70  | 10.26 | 0 |
| rrnAC0201                                             | > 2 unique peptides | <i>aldY2</i>     | Aldehyde dehydrogenase (EC 1.2.1.3)                                                                                                                                                     | 39  | 94  | 133 | 0.41 | 12 | 121 | 9.02  | 0 |
| rrnAC2529                                             | > 2 unique peptides | <i>hisA</i>      | 1-(5-phosphoribosyl)-5-[(5-phosphoribosylamino)methylideneamino]imidazole-4-carboxamide isomerase (EC 5.3.1.16)(Phosphoribosylformimino-5-aminoimidazole carboxamide ribotideisomerase) | 1   | 4   | 5   | 0.25 | 0  | 5   | 0     | 0 |
| rrnAC1394                                             | > 2 unique peptides | <i>hisF</i>      | Imidazole glycerol phosphate synthase subunit hisF (EC 4.1.3.-) (IGP synthase cyclase subunit) (IGP synthase subunit hisF) (ImGP synthasesubunit hisF)                                  | 0   | 3   | 3   | 0    | 0  | 3   | 0     | 0 |
| rrnAC2524                                             | ND                  |                  |                                                                                                                                                                                         |     |     |     |      |    |     |       |   |
| rrnAC2794                                             | ND                  |                  |                                                                                                                                                                                         |     |     |     |      |    |     |       |   |
| rrnAC2555                                             | ND                  |                  |                                                                                                                                                                                         |     |     |     |      |    |     |       |   |
| rrnAC1934                                             | ND                  |                  |                                                                                                                                                                                         |     |     |     |      |    |     |       |   |
| pNG7352                                               | ND                  |                  |                                                                                                                                                                                         |     |     |     |      |    |     |       |   |
| rrnAC2631                                             | ND                  |                  |                                                                                                                                                                                         |     |     |     |      |    |     |       |   |
| rrnB0092                                              | ND                  |                  |                                                                                                                                                                                         |     |     |     |      |    |     |       |   |
| rrnB0095                                              | ND                  |                  |                                                                                                                                                                                         |     |     |     |      |    |     |       |   |
| rrnAC0542                                             | ND                  |                  |                                                                                                                                                                                         |     |     |     |      |    |     |       |   |
| rrnAC3101                                             | ND                  |                  |                                                                                                                                                                                         |     |     |     |      |    |     |       |   |
| <b>00350 Tyrosine metabolism [PATH:hma00350]</b>      |                     |                  |                                                                                                                                                                                         |     |     |     |      |    |     |       |   |
| rrnB0219                                              | > 2 unique peptides | <i>gabD</i>      | Succinate-semialdehyde dehydrogenase                                                                                                                                                    | 9   | 1   | 10  | 9    | 0  | 10  | 0     | 0 |
| rrnB0206                                              | > 2 unique peptides | <i>aspC1</i>     | Aspartate aminotransferase (EC 2.6.1.1)                                                                                                                                                 | 28  | 6   | 34  | 4.67 | 4  | 30  | 11.76 | 0 |
| rrnAC3495                                             | > 2 unique peptides | <i>aspB2</i>     | Aspartate aminotransferase (EC 2.6.1.1)                                                                                                                                                 | 26  | 20  | 46  | 1.3  | 1  | 45  | 2.17  | 0 |
| rrnAC0012                                             | > 2 unique peptides | <i>adh11</i>     | Zinc-binding dehydrogenase (EC 1.1.1.1) (EC 1.6.5.5)                                                                                                                                    | 18  | 17  | 35  | 1.06 | 1  | 34  | 2.86  | 0 |
| rrnAC0529                                             | > 2 unique peptides | <i>hisC</i>      | Histidinol-phosphate aminotransferase (EC 2.6.1.9) (Imidazole acetol-phosphate transaminase)                                                                                            | 6   | 7   | 13  | 0.86 | 0  | 13  | 0     | 0 |
| pNG7289                                               | > 2 unique peptides | <i>adh6</i>      | Zinc-binding dehydrogenase (EC 1.1.1.1) (EC 1.6.5.5)                                                                                                                                    | 9   | 13  | 22  | 0.69 | 0  | 22  | 0     | 0 |
| rrnAC1402                                             | > 2 unique peptides | <i>adh4</i>      | Alcohol dehydrogenase (EC 1.1.1.1)                                                                                                                                                      | 5   | 8   | 13  | 0.63 | 0  | 13  | 0     | 0 |
| pNG7278                                               | > 2 unique peptides | <i>adh12</i>     | Alcohol dehydrogenase (EC 1.1.1.1)                                                                                                                                                      | 4   | 7   | 11  | 0.57 | 0  | 11  | 0     | 0 |
| rrnAC0191                                             | > 2 unique peptides | <i>adh3</i>      | Zinc-binding dehydrogenase (EC 1.1.1.1) (EC 1.6.5.5)                                                                                                                                    | 6   | 11  | 17  | 0.55 | 1  | 16  | 5.88  | 0 |
| rrnAC1434                                             | > 2 unique peptides | <i>aspC3</i>     | Aspartate aminotransferase (EC 2.6.1.1)                                                                                                                                                 | 10  | 31  | 41  | 0.32 | 0  | 41  | 0     | 0 |
| pNG7032                                               | > 2 unique peptides | <i>adh10</i>     | Zinc-binding dehydrogenase (EC 1.1.1.1) (EC 1.6.5.5)                                                                                                                                    | 0   | 3   | 3   | 0    | 0  | 3   | 0     | 0 |
| pNG7314                                               | single hit          | <i>adhC</i>      | Formaldehyde dehydrogenase (EC 1.1.1.1)                                                                                                                                                 | 1   | 1   | 2   | 1    | 0  | 2   | 0     | 0 |
| pNG7351                                               | single hit          | <i>adh13</i>     | Zinc-binding dehydrogenase (EC 1.1.1.1) (EC 1.6.5.5)                                                                                                                                    | 0   | 2   | 2   | 0    | 0  | 2   | 0     | 0 |
| rrnAC1934                                             | ND                  |                  |                                                                                                                                                                                         |     |     |     |      |    |     |       |   |
| rrnAC1798                                             | ND                  |                  |                                                                                                                                                                                         |     |     |     |      |    |     |       |   |
| pNG7022                                               | ND                  |                  |                                                                                                                                                                                         |     |     |     |      |    |     |       |   |
| pNG7101                                               | ND                  |                  |                                                                                                                                                                                         |     |     |     |      |    |     |       |   |
| pNG7103                                               | ND                  |                  |                                                                                                                                                                                         |     |     |     |      |    |     |       |   |
| rrnAC1300                                             | ND                  |                  |                                                                                                                                                                                         |     |     |     |      |    |     |       |   |
| rrnAC1975                                             | ND                  |                  |                                                                                                                                                                                         |     |     |     |      |    |     |       |   |
| rrnAC2172                                             | ND                  |                  |                                                                                                                                                                                         |     |     |     |      |    |     |       |   |
| rrnAC3506                                             | ND                  |                  |                                                                                                                                                                                         |     |     |     |      |    |     |       |   |
| rrnAC0542                                             | ND                  |                  |                                                                                                                                                                                         |     |     |     |      |    |     |       |   |
| rrnAC3101                                             | ND                  |                  |                                                                                                                                                                                         |     |     |     |      |    |     |       |   |
| <b>00360 Phenylalanine metabolism [PATH:hma00360]</b> |                     |                  |                                                                                                                                                                                         |     |     |     |      |    |     |       |   |
| rrnB0206                                              | > 2 unique peptides | <i>aspC1</i>     | Aspartate aminotransferase (EC 2.6.1.1)                                                                                                                                                 | 28  | 6   | 34  | 4.67 | 4  | 30  | 11.76 | 0 |
| rrnAC3495                                             | > 2 unique peptides | <i>aspB2</i>     | Aspartate aminotransferase (EC 2.6.1.1)                                                                                                                                                 | 26  | 20  | 46  | 1.3  | 1  | 45  | 2.17  | 0 |
| rrnAC0529                                             | > 2 unique peptides | <i>hisC</i>      | Histidinol-phosphate aminotransferase (EC 2.6.1.9) (Imidazole acetol-phosphate transaminase)                                                                                            | 6   | 7   | 13  | 0.86 | 0  | 13  | 0     | 0 |
| rrnAC0717                                             | > 2 unique peptides | <i>rrnAC0717</i> | FAD/NAD binding oxidoreductase (EC 1.18.1.3)                                                                                                                                            | 5   | 8   | 13  | 0.63 | 0  | 13  | 0     | 0 |
| rrnB0243                                              | > 2 unique peptides | <i>paaK1</i>     | Phenylacetyl-coenzyme A ligase                                                                                                                                                          | 5   | 15  | 20  | 0.33 | 0  | 20  | 0     | 0 |
| rrnAC1434                                             | > 2 unique peptides | <i>aspC3</i>     | Aspartate aminotransferase (EC 2.6.1.1)                                                                                                                                                 | 10  | 31  | 41  | 0.32 | 0  | 41  | 0     | 0 |
| rrnB0231                                              | ND                  |                  |                                                                                                                                                                                         |     |     |     |      |    |     |       |   |
| rrnAC1934                                             | ND                  |                  |                                                                                                                                                                                         |     |     |     |      |    |     |       |   |
| <b>00380 Tryptophan metabolism [PATH:hma00380]</b>    |                     |                  |                                                                                                                                                                                         |     |     |     |      |    |     |       |   |
| rrnAC3497                                             | > 2 unique peptides | <i>yqeF</i>      | Acetyl-coA acetyltransferase (EC 2.3.1.9)                                                                                                                                               | 3   | 1   | 4   | 3    | 0  | 4   | 0     | 0 |
| rrnB0254                                              | > 2 unique peptides | <i>ech6</i>      | Enoyl-CoA hydratase (EC 4.2.1.17)                                                                                                                                                       | 6   | 3   | 9   | 2    | 0  | 9   | 0     | 0 |
| rrnAC0896                                             | > 2 unique peptides | <i>acaB3</i>     | 3-ketoacyl-CoA thiolase (EC 2.3.1.9)                                                                                                                                                    | 30  | 16  | 46  | 1.88 | 0  | 46  | 0     | 0 |
| rrnB0242                                              | > 2 unique peptides | <i>acaB2</i>     | 3-ketoacyl-CoA thiolase (EC 2.3.1.9) (EC 2.3.1.16)                                                                                                                                      | 7   | 5   | 12  | 1.4  | 0  | 12  | 0     | 0 |
| rrnB0240                                              | > 2 unique peptides | <i>aca1</i>      | Acetyl-coA acetyltransferase (EC 2.3.1.9)                                                                                                                                               | 31  | 25  | 56  | 1.24 | 2  | 54  | 3.57  | 0 |
| rrnAC2815                                             | > 2 unique peptides | <i>aca2</i>      | Acetyl-coA acetyltransferase (EC 2.3.1.9)                                                                                                                                               | 57  | 51  | 108 | 1.12 | 2  | 106 | 1.85  | 0 |
| rrnAC1171                                             | > 2 unique peptides | <i>perA</i>      | Peroxidase/catalase (EC 1.11.1.6) (Catalase-peroxidase)                                                                                                                                 | 161 | 155 | 316 | 1.04 | 3  | 313 | 0.95  | 0 |
| rrnAC1979                                             | > 2 unique peptides | <i>ech5</i>      | Enoyl-CoA hydratase/isomerase (EC 4.2.1.17)                                                                                                                                             | 4   | 4   | 8   | 1    | 0  | 8   | 0     | 0 |
| rrnB0309                                              | > 2 unique peptides | <i>acaB1</i>     | 3-ketoacyl-CoA thiolase (EC 2.3.1.9)                                                                                                                                                    | 2   | 2   | 4   | 1    | 0  | 4   | 0     | 0 |
| rrnAC2965                                             | > 2 unique peptides | <i>trpS</i>      | Tryptophanyl-tRNA synthetase (EC 6.1.1.2)                                                                                                                                               | 11  | 11  | 22  | 1    | 0  | 22  | 0     | 0 |
| rrnAC1083                                             | > 2 unique peptides | <i>hbd1</i>      | 3-hydroxyacyl-CoA dehydrogenase (EC 1.1.1.35) (EC 4.2.1.17)                                                                                                                             | 122 | 136 | 258 | 0.9  | 6  | 252 | 2.33  | 0 |
| rrnAC1982                                             | > 2 unique peptides | <i>hbd2</i>      | 3-hydroxybutyryl-CoA dehydrogenase (EC 1.1.1.35) (EC 4.2.1.17)                                                                                                                          | 17  | 22  | 39  | 0.77 | 0  | 39  | 0     | 0 |
| rrnB0246                                              | > 2 unique peptides | <i>aldY5</i>     | Aldehyde dehydrogenase (EC 1.2.1.3)                                                                                                                                                     | 47  | 62  | 109 | 0.76 | 1  | 108 | 0.92  | 0 |





|                                                                                      |                     |                  |                                                                                                  |    |    |     |         |    |     |       |    |  |
|--------------------------------------------------------------------------------------|---------------------|------------------|--------------------------------------------------------------------------------------------------|----|----|-----|---------|----|-----|-------|----|--|
| rrnAC0052                                                                            | ND                  |                  |                                                                                                  |    |    |     |         |    |     |       |    |  |
| <b>00440 Phosphonate and phosphinate metabolism [PATH:hma00440]</b>                  |                     |                  |                                                                                                  |    |    |     |         |    |     |       |    |  |
| pNG7088                                                                              | > 2 unique peptides | <i>qad</i>       | Quinohemoprotein alcohol dehydrogenase (EC 1.1.99.-)                                             | 17 | 9  | 26  | 1.89    | 26 | 0   | 100   | 0  |  |
| pNG7099                                                                              | single hit          | <i>cpt</i>       | CDP-alcohol phosphatidyltransferase (EC 2.7.8.-)                                                 | 1  | 0  | 1   | #DIV/0! | 1  | 0   | 100   | 5  |  |
| <b>00450 Selenoamino acid metabolism [PATH:hma00450]</b>                             |                     |                  |                                                                                                  |    |    |     |         |    |     |       |    |  |
| rrnAC2840                                                                            | > 2 unique peptides | <i>ahcY</i>      | Adenosylhomocysteinase (EC 3.3.1.1) (AdoHcyase) (S-adenosyl-L-homocysteine hydrolase)            | 15 | 11 | 26  | 1.36    | 0  | 26  | 0     | 0  |  |
| rrnAC1233                                                                            | > 2 unique peptides | <i>mat</i>       | S-adenosylmethionine synthetase (EC 2.5.1.6) (Methionineadenosyltransferase) (AdoMet synthetase) | 10 | 8  | 18  | 1.25    | 0  | 18  | 0     | 0  |  |
| rrnAC1800                                                                            | > 2 unique peptides | <i>metG</i>      | Methionyl-tRNA synthetase (EC 6.1.1.10) (Methionine--tRNA ligase)(MetRS)                         | 24 | 20 | 44  | 1.2     | 0  | 44  | 0     | 0  |  |
| rrnAC1236                                                                            | > 2 unique peptides | <i>cysK1</i>     | Cysteine synthase (EC 2.5.1.47)                                                                  | 2  | 3  | 5   | 0.67    | 0  | 5   | 0     | 0  |  |
| rrnAC2414                                                                            | > 2 unique peptides | <i>metB</i>      | Cystathionine gamma-synthase (EC 2.5.1.48)                                                       | 30 | 46 | 76  | 0.65    | 1  | 75  | 1.32  | 0  |  |
| rrnAC3104                                                                            | > 2 unique peptides | <i>csd1</i>      | Probable cysteine desulfurase (EC 4.4.1.-)                                                       | 3  | 7  | 10  | 0.43    | 1  | 9   | 10    | 0  |  |
| rrnAC0542                                                                            | ND                  |                  |                                                                                                  |    |    |     |         |    |     |       |    |  |
| rrnAC3101                                                                            | ND                  |                  |                                                                                                  |    |    |     |         |    |     |       |    |  |
| rrnAC0137                                                                            | ND                  |                  |                                                                                                  |    |    |     |         |    |     |       |    |  |
| pNG7239                                                                              | ND                  |                  |                                                                                                  |    |    |     |         |    |     |       |    |  |
| <b>00460 Cyanoamino acid metabolism [PATH:hma00460]</b>                              |                     |                  |                                                                                                  |    |    |     |         |    |     |       |    |  |
| rrnAC0999                                                                            | > 2 unique peptides | <i>glyA</i>      | Serine hydroxymethyltransferase (EC 2.1.2.1) (Serine methylase)(SHMT)                            | 20 | 16 | 36  | 1.25    | 0  | 36  | 0     | 0  |  |
| rrnAC1113                                                                            | > 2 unique peptides | <i>bgIX-2</i>    | Beta-D-glucosidase                                                                               | 0  | 4  | 4   | 0       | 0  | 4   | 0     | 0  |  |
| pNG7354                                                                              | ND                  |                  |                                                                                                  |    |    |     |         |    |     |       |    |  |
| rrnAC0173                                                                            | ND                  |                  |                                                                                                  |    |    |     |         |    |     |       |    |  |
| rrnAC3420                                                                            | ND                  |                  |                                                                                                  |    |    |     |         |    |     |       |    |  |
| <b>00471 D-Glutamine and D-glutamate metabolism</b>                                  |                     |                  |                                                                                                  |    |    |     |         |    |     |       |    |  |
| rrnAC0384                                                                            | > 2 unique peptides | <i>gdhA1</i>     | NADP-specific glutamate dehydrogenase (EC 1.4.1.3)                                               | 76 | 51 | 127 | 1.49    | 25 | 102 | 19.69 | 0  |  |
| pNG7157                                                                              | > 2 unique peptides | <i>gdhB</i>      | NAD(P)-specific glutamate dehydrogenase (EC 1.4.1.3)                                             | 76 | 75 | 151 | 1.01    | 19 | 132 | 12.58 | 0  |  |
| rrnAC0775                                                                            | > 2 unique peptides | <i>gdhA2</i>     | NAD(P)-specific glutamate dehydrogenase (EC 1.4.1.3)                                             | 52 | 64 | 116 | 0.81    | 1  | 115 | 0.86  | 0  |  |
| <b>00480 Glutathione metabolism [PATH:hma00480]</b>                                  |                     |                  |                                                                                                  |    |    |     |         |    |     |       |    |  |
| rrnAC3419                                                                            | > 2 unique peptides | <i>icd</i>       | Isocitrate dehydrogenase (EC 1.1.1.42)                                                           | 96 | 90 | 186 | 1.07    | 11 | 175 | 5.91  | 0  |  |
| rrnAC2180                                                                            | > 2 unique peptides | <i>gnd</i>       | 6-phosphogluconate dehydrogenase (EC 1.1.1.44)                                                   | 5  | 3  | 8   | 1.67    | 0  | 8   | 0     | 0  |  |
| rrnAC0198                                                                            | single hit          | <i>odc</i>       | Diaminopimelate decarboxylase (EC 4.1.1.20)                                                      | 0  | 1  | 1   | 0       | 0  | 1   | 0     | 0  |  |
| rrnB0070                                                                             | ND                  |                  |                                                                                                  |    |    |     |         |    |     |       |    |  |
| <b>01107 Glycan Biosynthesis and Metabolism</b>                                      |                     |                  |                                                                                                  |    |    |     |         |    |     |       |    |  |
| <b>00514 O-Mannosyl glycan biosynthesis</b>                                          |                     |                  |                                                                                                  |    |    |     |         |    |     |       |    |  |
| rrnAC1432                                                                            | > 2 unique peptides | <i>dpm5</i>      | Dolichyl-phosphate-mannose-protein mannosyltransferase (EC 2.4.1.-)(EC 2.4.1.109)                | 32 | 20 | 52  | 1.6     | 52 | 0   | 100   | 10 |  |
| <b>01005 Lipopolysaccharide biosynthesis proteins</b>                                |                     |                  |                                                                                                  |    |    |     |         |    |     |       |    |  |
| pNG7011                                                                              | ND                  |                  |                                                                                                  |    |    |     |         |    |     |       |    |  |
| <b>00511 Other glycan degradation [PATH:hma00511]</b>                                |                     |                  |                                                                                                  |    |    |     |         |    |     |       |    |  |
| pNG5066                                                                              | ND                  |                  |                                                                                                  |    |    |     |         |    |     |       |    |  |
| <b>01003 Glycosyltransferases</b>                                                    |                     |                  |                                                                                                  |    |    |     |         |    |     |       |    |  |
| rrnAC1432                                                                            | > 2 unique peptides | <i>dpm5</i>      | Dolichyl-phosphate-mannose-protein mannosyltransferase (EC 2.4.1.-)(EC 2.4.1.109)                | 32 | 20 | 52  | 1.6     | 52 | 0   | 100   | 10 |  |
| rrnAC0431                                                                            | > 2 unique peptides | <i>tot</i>       | Transmembrane oligosaccharyl transferase                                                         | 55 | 35 | 90  | 1.57    | 90 | 0   | 100   | 13 |  |
| rrnAC3242                                                                            | > 2 unique peptides | <i>rrnAC3242</i> | Hypothetical protein                                                                             | 3  | 2  | 5   | 1.5     | 5  | 0   | 100   | 11 |  |
| rrnAC0419                                                                            | > 2 unique peptides | <i>gtl</i>       | Glycosyl transferase-like                                                                        | 15 | 11 | 26  | 1.36    | 26 | 0   | 100   | 2  |  |
| <b>01108 Biosynthesis of Polyketides and Nonribosomal Peptides</b>                   |                     |                  |                                                                                                  |    |    |     |         |    |     |       |    |  |
| <b>00523 Polyketide sugar unit biosynthesis [PATH:hma00523]</b>                      |                     |                  |                                                                                                  |    |    |     |         |    |     |       |    |  |
| rrnAC0633                                                                            | > 2 unique peptides | <i>rffH2</i>     | Glucose-1-phosphate thymidyltransferase (EC 2.7.7.24)                                            | 35 | 23 | 58  | 1.52    | 0  | 58  | 0     | 0  |  |
| rrnAC2178                                                                            | > 2 unique peptides | <i>rffB3</i>     | DTDP-glucose-46-dehydratase (EC 4.2.1.46)                                                        | 4  | 3  | 7   | 1.33    | 7  | 0   | 100   | 0  |  |
| rrnAC1572                                                                            | > 2 unique peptides | <i>rffB2</i>     | DTDP-glucose-46-dehydratase (EC 4.2.1.46)                                                        | 27 | 23 | 50  | 1.17    | 2  | 48  | 4     | 0  |  |
| rrnAC1011                                                                            | > 2 unique peptides | <i>rffG</i>      | DTDP-glucose dehydratase (EC 4.2.1.46)                                                           | 3  | 4  | 7   | 0.75    | 1  | 6   | 14.29 | 0  |  |
| rrnAC1010                                                                            | > 2 unique peptides | <i>rffB1</i>     | DTDP-glucose 4-6-dehydratase (EC 4.2.1.46)                                                       | 29 | 39 | 68  | 0.74    | 13 | 55  | 19.12 | 0  |  |
| rrnAC3238                                                                            | > 2 unique peptides | <i>rffH3</i>     | Glucose-1-phosphate thymidyltransferase (EC 2.7.7.24)                                            | 10 | 18 | 28  | 0.56    | 3  | 25  | 10.71 | 0  |  |
| rrnAC1960                                                                            | > 2 unique peptides | <i>graD4b</i>    | Glucose-1-phosphate thymidyltransferase                                                          | 7  | 13 | 20  | 0.54    | 0  | 20  | 0     | 0  |  |
| rrnAC3232                                                                            | > 2 unique peptides | <i>graD4c</i>    | Glucose-1-phosphate thymidyltransferase                                                          | 3  | 7  | 10  | 0.43    | 0  | 10  | 0     | 0  |  |
| pNG7218                                                                              | ND                  |                  |                                                                                                  |    |    |     |         |    |     |       |    |  |
| rrnAC2343                                                                            | ND                  |                  |                                                                                                  |    |    |     |         |    |     |       |    |  |
| <b>01053 Biosynthesis of siderophore group nonribosomal peptides [PATH:hma01053]</b> |                     |                  |                                                                                                  |    |    |     |         |    |     |       |    |  |
| rrnAC0837                                                                            | ND                  |                  |                                                                                                  |    |    |     |         |    |     |       |    |  |
| rrnAC2100                                                                            | ND                  |                  |                                                                                                  |    |    |     |         |    |     |       |    |  |
| <b>01055 Biosynthesis of vancomycin group antibiotics</b>                            |                     |                  |                                                                                                  |    |    |     |         |    |     |       |    |  |
| rrnAC2178                                                                            | > 2 unique peptides | <i>rffB3</i>     | DTDP-glucose-46-dehydratase (EC 4.2.1.46)                                                        | 4  | 3  | 7   | 1.33    | 7  | 0   | 100   | 0  |  |
| rrnAC1572                                                                            | > 2 unique peptides | <i>rffB2</i>     | DTDP-glucose-46-dehydratase (EC 4.2.1.46)                                                        | 27 | 23 | 50  | 1.17    | 2  | 48  | 4     | 0  |  |
| rrnAC1011                                                                            | > 2 unique peptides | <i>rffG</i>      | DTDP-glucose dehydratase (EC 4.2.1.46)                                                           | 3  | 4  | 7   | 0.75    | 1  | 6   | 14.29 | 0  |  |
| rrnAC1010                                                                            | > 2 unique peptides | <i>rffB1</i>     | DTDP-glucose 4-6-dehydratase (EC 4.2.1.46)                                                       | 29 | 39 | 68  | 0.74    | 13 | 55  | 19.12 | 0  |  |
| <b>01109 Metabolism of Cofactors and Vitamins</b>                                    |                     |                  |                                                                                                  |    |    |     |         |    |     |       |    |  |
| <b>00730 Thiamine metabolism [PATH:hma00730]</b>                                     |                     |                  |                                                                                                  |    |    |     |         |    |     |       |    |  |
| rrnAC2449                                                                            | > 2 unique peptides | <i>thiD</i>      | Phosphomethylpyrimidine kinase (EC 2.7.4.7)                                                      | 5  | 1  | 6   | 5       | 0  | 6   | 0     | 0  |  |
| rrnAC3104                                                                            | > 2 unique peptides | <i>csd1</i>      | Probable cysteine desulfurase (EC 4.4.1.-)                                                       | 3  | 7  | 10  | 0.43    | 1  | 9   | 10    | 0  |  |
| rrnAC1765                                                                            | > 2 unique peptides | <i>tenA</i>      | Transcriptional activator tenA                                                                   | 3  | 21 | 24  | 0.14    | 1  | 23  | 4.17  | 0  |  |

|                                                                     |                     |                  |                                                                                                                                   |    |    |            |         |     |    |       |   |
|---------------------------------------------------------------------|---------------------|------------------|-----------------------------------------------------------------------------------------------------------------------------------|----|----|------------|---------|-----|----|-------|---|
| rrnAC1182                                                           | > 2 unique peptides | <i>thiC</i>      | Thiamine biosynthesis protein thiC                                                                                                | 0  | 59 | <b>59</b>  | 0       | 2   | 57 | 3.39  | 0 |
| rrnAC1767                                                           | > 2 unique peptides | <i>tenA-2</i>    | Transcriptional regulator putative                                                                                                | 0  | 9  | <b>9</b>   | 0       | 0   | 9  | 0     | 0 |
| rrnAC1234                                                           | ND                  |                  |                                                                                                                                   |    |    |            |         |     |    |       |   |
| rrnAC2143                                                           | ND                  |                  |                                                                                                                                   |    |    |            |         |     |    |       |   |
| rrnAC3177                                                           | ND                  |                  |                                                                                                                                   |    |    |            |         |     |    |       |   |
| rrnAC2493                                                           | ND                  |                  |                                                                                                                                   |    |    |            |         |     |    |       |   |
| <b>00740 Riboflavin metabolism [PATH:hma00740]</b>                  |                     |                  |                                                                                                                                   |    |    |            |         |     |    |       |   |
| rrnAC3074                                                           | > 2 unique peptides | <i>rrnAC3074</i> | Hypothetical protein                                                                                                              | 1  | 2  | <b>3</b>   | 0.5     | 0   | 3  | 0     | 0 |
| rrnAC2367                                                           | > 2 unique peptides | <i>ribC</i>      | Ribiflavin synthase alpha chain (EC 2.5.1.9)                                                                                      | 2  | 9  | <b>11</b>  | 0.22    | 0   | 11 | 0     | 0 |
| rrnAC1131                                                           | single hit          | <i>ribG</i>      | 25-diamino-6-hydroxy-4-(5-phosphoribosylamino)pyrimidine 1-reductase(EC 1.1.1.-)                                                  | 2  | 2  | <b>4</b>   | 1       | 0   | 4  | 0     | 0 |
| rrnAC3073                                                           | ND                  |                  |                                                                                                                                   |    |    |            |         |     |    |       |   |
| rrnAC1433                                                           | ND                  |                  |                                                                                                                                   |    |    |            |         |     |    |       |   |
| <b>00750 Vitamin B6 metabolism [PATH:hma00750]</b>                  |                     |                  |                                                                                                                                   |    |    |            |         |     |    |       |   |
| rrnAC2667                                                           | > 2 unique peptides | <i>thrC3</i>     | Threonine synthase                                                                                                                | 75 | 38 | <b>113</b> | 1.97    | 106 | 7  | 93.81 | 0 |
| rrnAC1732                                                           | > 2 unique peptides | <i>pdxS</i>      | Pyridoxal biosynthesis lyase pdxS (EC 4.-.-.)                                                                                     | 46 | 44 | <b>90</b>  | 1.05    | 4   | 86 | 4.44  | 0 |
| rrnAC2369                                                           | > 2 unique peptides | <i>pdxT</i>      | Glutamine amidotransferase subunit pdxT (EC 2.6.-.-) (Glutamineamidotransferase glutaminase subunit pdxT)                         | 10 | 12 | <b>22</b>  | 0.83    | 0   | 22 | 0     | 0 |
| rrnAC3505                                                           | > 2 unique peptides | <i>thrC1</i>     | Threonine synthase (EC 4.2.3.1)                                                                                                   | 5  | 10 | <b>15</b>  | 0.5     | 0   | 15 | 0     | 0 |
| pNG7257                                                             | ND                  |                  |                                                                                                                                   |    |    |            |         |     |    |       |   |
| rrnAC2515                                                           | ND                  |                  |                                                                                                                                   |    |    |            |         |     |    |       |   |
| <b>00760 Nicotinate and nicotinamide metabolism [PATH:hma00760]</b> |                     |                  |                                                                                                                                   |    |    |            |         |     |    |       |   |
| rrnAC2241                                                           | > 2 unique peptides | <i>rrnAC2241</i> | Quinolinate phosphoribosyl transferase (EC 2.4.2.19)                                                                              | 9  | 2  | <b>11</b>  | 4.5     | 0   | 11 | 0     | 0 |
| rrnAC2486                                                           | > 2 unique peptides | <i>nadE1</i>     | NH(3)-dependent NAD(+) synthetase (EC 6.3.1.5)                                                                                    | 8  | 9  | <b>17</b>  | 0.89    | 0   | 17 | 0     | 0 |
| rrnAC0514                                                           | > 2 unique peptides | <i>surE</i>      | 5'-nucleotidase surE (EC 3.1.3.5) (Nucleoside 5'-monophosphatephosphohydrolase)                                                   | 3  | 4  | <b>7</b>   | 0.75    | 0   | 7  | 0     | 0 |
| rrnAC3391                                                           | > 2 unique peptides | <i>ppnK</i>      | Probable inorganic polyphosphate/ATP-NAD kinase (EC 2.7.1.23)(Poly(P)/ATP NAD kinase)                                             | 1  | 2  | <b>3</b>   | 0.5     | 0   | 3  | 0     | 0 |
| rrnAC1913                                                           | single hit          | <i>rrnAC1913</i> | Nicotinamide-nucleotide adenyltransferase (EC 2.7.7.1) (NAD(+)pyrophosphorylase) (NAD(+) diphosphorylase) (NMN adenyltransferase) | 0  | 1  | <b>1</b>   | 0       | 0   | 1  | 0     | 0 |
| rrnAC3409                                                           | ND                  |                  |                                                                                                                                   |    |    |            |         |     |    |       |   |
| rrnAC3410                                                           | ND                  |                  |                                                                                                                                   |    |    |            |         |     |    |       |   |
| rrnAC3408                                                           | ND                  |                  |                                                                                                                                   |    |    |            |         |     |    |       |   |
| pNG7227                                                             | ND                  |                  |                                                                                                                                   |    |    |            |         |     |    |       |   |
| rrnAC0226                                                           | ND                  |                  |                                                                                                                                   |    |    |            |         |     |    |       |   |
| rrnAC0727                                                           | ND                  |                  |                                                                                                                                   |    |    |            |         |     |    |       |   |
| rrnAC0821                                                           | ND                  |                  |                                                                                                                                   |    |    |            |         |     |    |       |   |
| <b>00770 Pantothenate and CoA biosynthesis [PATH:hma00770]</b>      |                     |                  |                                                                                                                                   |    |    |            |         |     |    |       |   |
| rrnAC0331                                                           | > 2 unique peptides | <i>ilvN</i>      | Acetolactate synthase small subunit (EC 2.2.1.6)                                                                                  | 2  | 0  | <b>2</b>   | #DIV/0! | 0   | 2  | 0     | 0 |
| rrnAC0330                                                           | > 2 unique peptides | <i>ilvB2</i>     | Acetolactate synthase (EC 2.2.1.6)                                                                                                | 8  | 3  | <b>11</b>  | 2.67    | 4   | 7  | 36.36 | 0 |
| rrnB0209                                                            | > 2 unique peptides | <i>ilvB3</i>     | Acetolactate synthase large subunit (EC 2.2.1.6)                                                                                  | 7  | 3  | <b>10</b>  | 2.33    | 0   | 10 | 0     | 0 |
| rrnAC0332                                                           | > 2 unique peptides | <i>ilvC</i>      | Ketol-acid reductoisomerase (EC 1.1.1.86) (Acetohydroxy-acidisomeroeductase) (Alpha-keto-beta-hydroxylacil reductoisomerase)      | 8  | 6  | <b>14</b>  | 1.33    | 0   | 14 | 0     | 0 |
| rrnAC0868                                                           | > 2 unique peptides | <i>coaD2</i>     | Phosphopantetheine adenyltransferase (EC 2.7.7.3)                                                                                 | 8  | 6  | <b>14</b>  | 1.33    | 0   | 14 | 0     | 0 |
| rrnAC0878                                                           | > 2 unique peptides | <i>panB</i>      | 3-methyl-2-oxobutanoate hydroxymethyltransferase (EC 2.1.2.11)                                                                    | 4  | 4  | <b>8</b>   | 1       | 0   | 8  | 0     | 0 |
| rrnAC0302                                                           | > 2 unique peptides | <i>ilvD</i>      | Dihydroxy-acid dehydratase (EC 4.2.1.9) (DAD)                                                                                     | 26 | 32 | <b>58</b>  | 0.81    | 0   | 58 | 0     | 0 |
| rrnAC0134                                                           | > 2 unique peptides | <i>ilvB1</i>     | Acetolactate synthase large subunit (EC 2.2.1.6)                                                                                  | 16 | 22 | <b>38</b>  | 0.73    | 1   | 37 | 2.63  | 0 |
| rrnAC3071                                                           | > 2 unique peptides | <i>ilvE1</i>     | Branched-chain amino acid aminotransferase                                                                                        | 20 | 35 | <b>55</b>  | 0.57    | 0   | 55 | 0     | 0 |
| rrnAC2278                                                           | single hit          | <i>coaD1</i>     | Phosphopantetheine adenyltransferase (EC 2.7.7.3)                                                                                 | 1  | 0  | <b>1</b>   | #DIV/0! | 0   | 1  | 0     | 0 |
| rrnAC3539                                                           | single hit          | <i>dfp</i>       | Pantothenate metabolism flavoprotein                                                                                              | 0  | 1  | <b>1</b>   | 0       | 0   | 1  | 0     | 0 |
| pNG7248                                                             | single hit          | <i>amaB</i>      | N-carbamoyl-L-amino acid amidohydrolase (EC 3.5.1.-)                                                                              | 0  | 1  | <b>1</b>   | 0       | 0   | 1  | 0     | 0 |
| rrnAC3068                                                           | ND                  |                  |                                                                                                                                   |    |    |            |         |     |    |       |   |
| rrnAC0711                                                           | ND                  |                  |                                                                                                                                   |    |    |            |         |     |    |       |   |
| rrnAC0052                                                           | ND                  |                  |                                                                                                                                   |    |    |            |         |     |    |       |   |
| <b>00780 Biotin metabolism [PATH:hma00780]</b>                      |                     |                  |                                                                                                                                   |    |    |            |         |     |    |       |   |
| rrnAC0001                                                           | > 2 unique peptides | <i>birA</i>      | Biotin-(Acetyl-CoA carboxylase) ligase                                                                                            | 0  | 5  | <b>5</b>   | 0       | 0   | 5  | 0     | 0 |
| rrnAC0885                                                           | ND                  |                  |                                                                                                                                   |    |    |            |         |     |    |       |   |
| rrnAC0883                                                           | ND                  |                  |                                                                                                                                   |    |    |            |         |     |    |       |   |
| <b>00785 Lipic acid metabolism [PATH:hma00785]</b>                  |                     |                  |                                                                                                                                   |    |    |            |         |     |    |       |   |
| rrnAC2019                                                           | single hit          | <i>lpl</i>       | Lipoate protein ligase (EC 6.3.4.-)                                                                                               | 0  | 1  | <b>1</b>   | 0       | 0   | 1  | 0     | 0 |
| rrnAC2959                                                           | ND                  |                  |                                                                                                                                   |    |    |            |         |     |    |       |   |
| <b>00790 Folate biosynthesis [PATH:hma00790]</b>                    |                     |                  |                                                                                                                                   |    |    |            |         |     |    |       |   |
| rrnAC0246                                                           | > 2 unique peptides | <i>folP3</i>     | Dihydropteroate synthase (EC 2.5.1.15)                                                                                            | 11 | 15 | <b>26</b>  | 0.73    | 1   | 25 | 3.85  | 0 |
| rrnAC1616                                                           | > 2 unique peptides | <i>mch</i>       | N(5)N(10)-methenyltetrahydromethanopterin cyclohydrolase(EC 3.5.4.27)                                                             | 2  | 9  | <b>11</b>  | 0.22    | 0   | 11 | 0     | 0 |
| pNG7379                                                             | single hit          | <i>folP2</i>     | Dihydropteroate synthase (EC 2.5.1.15)                                                                                            | 0  | 3  | <b>3</b>   | 0       | 0   | 3  | 0     | 0 |
| rrnAC2437                                                           | single hit          | <i>mer1</i>      | F420-dependent N5N10-methylene-tetrahydromethanopterin reductase                                                                  | 0  | 2  | <b>2</b>   | 0       | 0   | 2  | 0     | 0 |
| pNG7382                                                             | ND                  |                  |                                                                                                                                   |    |    |            |         |     |    |       |   |
| rrnAC0184                                                           | ND                  |                  |                                                                                                                                   |    |    |            |         |     |    |       |   |
| pNG7359                                                             | ND                  |                  |                                                                                                                                   |    |    |            |         |     |    |       |   |
| rrnAC0859                                                           | ND                  |                  |                                                                                                                                   |    |    |            |         |     |    |       |   |
| rrnAC2166                                                           | ND                  |                  |                                                                                                                                   |    |    |            |         |     |    |       |   |
| <b>00670 One carbon pool by folate [PATH:hma00670]</b>              |                     |                  |                                                                                                                                   |    |    |            |         |     |    |       |   |
| rrnAC1121                                                           | > 2 unique peptides | <i>thyX</i>      | Thymidylate synthase thyX (EC 2.1.1.148) (TS) (TSase)                                                                             | 19 | 11 | <b>30</b>  | 1.73    | 0   | 30 | 0     | 0 |
| rrnAC0999                                                           | > 2 unique peptides | <i>glyA</i>      | Serine hydroxymethyltransferase (EC 2.1.2.1) (Serine methylase)(SHMT)                                                             | 20 | 16 | <b>36</b>  | 1.25    | 0   | 36 | 0     | 0 |

|                                                                                  |                     |                  |                                                                                                                                 |     |     |     |         |    |     |       |   |
|----------------------------------------------------------------------------------|---------------------|------------------|---------------------------------------------------------------------------------------------------------------------------------|-----|-----|-----|---------|----|-----|-------|---|
| rrnAC0996                                                                        | > 2 unique peptides | <i>fold 1</i>    | Bifunctional protein fold 1 [Includes: Methylene-tetrahydrofolate dehydrogenase (EC 1.5.1.5)]                                   | 14  | 15  | 29  | 0.93    | 0  | 29  | 0     | 0 |
| rrnAC0189                                                                        | > 2 unique peptides | <i>purH</i>      | Bifunctional purine biosynthesis protein PurH (EC 3.5.4.10)(EC 2.1.2.3) (EC 2.1.2.2)                                            | 28  | 33  | 61  | 0.85    | 0  | 61  | 0     | 0 |
| rrnAC3272                                                                        | > 2 unique peptides | <i>purU</i>      | Formyltetrahydrofolate deformylase (EC 3.5.1.10) (EC 2.1.2.2)                                                                   | 4   | 8   | 12  | 0.5     | 0  | 12  | 0     | 0 |
| rrnAC1500                                                                        | > 2 unique peptides | <i>gcvT</i>      | Probable aminomethyltransferase (EC 2.1.2.10) (Glycine cleavage systemT protein)                                                | 1   | 3   | 4   | 0.33    | 0  | 4   | 0     | 0 |
| pNG7361                                                                          | > 2 unique peptides | <i>gcvT5</i>     | Probable aminomethyltransferase (EC 2.1.2.10)                                                                                   | 32  | 104 | 136 | 0.31    | 5  | 131 | 3.68  | 0 |
| pNG7366                                                                          | > 2 unique peptides | <i>gcvT3</i>     | Sacrosine dehydrogenase/glycine cleavage T-protein (EC 1.5.3.1)(EC 2.1.2.10)                                                    | 9   | 40  | 49  | 0.23    | 0  | 49  | 0     | 0 |
| pNG7380                                                                          | > 2 unique peptides | <i>fhs</i>       | Formate--tetrahydrofolate ligase (EC 6.3.4.3) (Formyltetrahydrofolatesynthetase) (FHS) (FTHFS)                                  | 2   | 27  | 29  | 0.07    | 1  | 28  | 3.45  | 0 |
| pNG7328                                                                          | > 2 unique peptides | <i>fold 2</i>    | Bifunctional protein fold 2 [Includes: Methylene-tetrahydrofolate dehydrogenase (EC 1.5.1.5)]                                   | 0   | 5   | 5   | 0       | 0  | 5   | 0     | 0 |
| pNG7370                                                                          | > 2 unique peptides | <i>gcvT1</i>     | Sacrosine dehydrogenase/glycine cleavage T-protein (EC 1.5.3.1)(EC 2.1.2.10)                                                    | 0   | 9   | 9   | 0       | 1  | 8   | 11.11 | 0 |
| pNG7363                                                                          | > 2 unique peptides | <i>metF</i>      | 5,10-methylenetetrahydrofolate reductase (EC 1.7.99.5)                                                                          | 0   | 4   | 4   | 0       | 4  | 0   | 100   | 0 |
| rrnAC3378                                                                        | single hit          | <i>rrnAC3378</i> | 5-formyltetrahydrofolate cyclo-ligase (EC 6.3.3.2)                                                                              | 1   | 0   | 1   | #DIV/0! | 0  | 1   | 0     | 0 |
| pNG7359                                                                          | ND                  |                  |                                                                                                                                 |     |     |     |         |    |     |       |   |
| rrnAC0859                                                                        | ND                  |                  |                                                                                                                                 |     |     |     |         |    |     |       |   |
| rrnAC2552                                                                        | ND                  |                  |                                                                                                                                 |     |     |     |         |    |     |       |   |
| pNG7381                                                                          | ND                  |                  |                                                                                                                                 |     |     |     |         |    |     |       |   |
| <b>00860 Porphyrin and chlorophyll metabolism [PATH:hma00860]</b>                |                     |                  |                                                                                                                                 |     |     |     |         |    |     |       |   |
| rrnAC3000                                                                        | > 2 unique peptides | <i>cblL</i>      | Precorrin-2 C20-methyltransferase                                                                                               | 5   | 0   | 5   | #DIV/0! | 2  | 3   | 40    | 0 |
| rrnAC3001                                                                        | > 2 unique peptides | <i>cblF</i>      | Cobalamin biosynthesis precorrin-3 methylase                                                                                    | 7   | 0   | 7   | #DIV/0! | 0  | 7   | 0     | 0 |
| rrnAC3019                                                                        | > 2 unique peptides | <i>cobN</i>      | Cobalamin biosynthesis protein                                                                                                  | 111 | 40  | 151 | 2.78    | 0  | 151 | 0     | 0 |
| rrnAC3018                                                                        | > 2 unique peptides | <i>hmca</i>      | Protoporphyrin IX magnesium chelatase                                                                                           | 4   | 2   | 6   | 2       | 0  | 6   | 0     | 0 |
| rrnAC3003                                                                        | > 2 unique peptides | <i>cblG</i>      | Cobalamin biosynthesis protein G                                                                                                | 12  | 7   | 19  | 1.71    | 0  | 19  | 0     | 0 |
| rrnAC1102                                                                        | > 2 unique peptides | <i>cobB</i>      | Probable cobyrinic acid A,C-diamide synthase                                                                                    | 5   | 3   | 8   | 1.67    | 3  | 5   | 37.5  | 0 |
| rrnAC3020                                                                        | > 2 unique peptides | <i>cblC</i>      | Precorrin-8X methylmutase (EC 5.4.1.2)                                                                                          | 36  | 24  | 60  | 1.5     | 3  | 57  | 5     | 0 |
| rrnAC3021                                                                        | > 2 unique peptides | <i>cblJ</i>      | Precorrin-3 methylase                                                                                                           | 38  | 26  | 64  | 1.46    | 1  | 63  | 1.56  | 0 |
| rrnAC1936                                                                        | > 2 unique peptides | <i>cobI</i>      | Cobalamin adenosyltransferase (EC 2.5.1.17)                                                                                     | 5   | 4   | 9   | 1.25    | 1  | 8   | 11.11 | 0 |
| rrnAC3005                                                                        | > 2 unique peptides | <i>cobH</i>      | Precorrin-3B C17-methyltransferase (EC 2.1.1.131)                                                                               | 14  | 12  | 26  | 1.17    | 0  | 26  | 0     | 0 |
| rrnAC2628                                                                        | > 2 unique peptides | <i>hemL</i>      | Glutamate-1-semialdehyde 2,1-aminomutase (EC 5.4.3.8) (GSA)(Glutamate-1-semialdehyde aminotransferase) (GSA-AT)                 | 10  | 9   | 19  | 1.11    | 0  | 19  | 0     | 0 |
| rrnAC3086                                                                        | > 2 unique peptides | <i>hemC</i>      | Porphobilinogen deaminase (EC 2.5.1.61)                                                                                         | 7   | 7   | 14  | 1       | 0  | 14  | 0     | 0 |
| rrnAC3008                                                                        | > 2 unique peptides | <i>cblH</i>      | Precorrin-3B C17-methyltransferase (EC 2.1.1.131)                                                                               | 24  | 25  | 49  | 0.96    | 6  | 43  | 12.24 | 0 |
| rrnAC0085                                                                        | > 2 unique peptides | <i>glx</i>       | Glutamyl-tRNA synthetase (EC 6.1.1.17) (Glutamate--tRNA ligase)(GluRS)                                                          | 10  | 11  | 21  | 0.91    | 0  | 21  | 0     | 0 |
| rrnAC2610                                                                        | > 2 unique peptides | <i>hemB</i>      | Delta-aminolevulinic acid dehydratase (EC 4.2.1.24)                                                                             | 10  | 12  | 22  | 0.83    | 0  | 22  | 0     | 0 |
| rrnAC1289                                                                        | > 2 unique peptides | <i>rrnAC1289</i> | Chelatase                                                                                                                       | 8   | 14  | 22  | 0.57    | 1  | 21  | 4.55  | 0 |
| rrnAC1709                                                                        | single hit          | <i>hemX</i>      | Uroporphyrin-III C-methyltransferase                                                                                            | 1   | 0   | 1   | #DIV/0! | 0  | 1   | 0     | 0 |
| rrnAC2998                                                                        | single hit          | <i>cblT</i>      | Precorrin-8W decarboxylase (EC 1.-.-)                                                                                           | 1   | 1   | 2   | 1       | 2  | 0   | 100   | 0 |
| rrnAC3088                                                                        | single hit          | <i>cysG1</i>     | Uroporphyrin-III C-methyltransferase                                                                                            | 0   | 2   | 2   | 0       | 0  | 2   | 0     | 0 |
| rrnAC1938                                                                        | single hit          | <i>cobQ</i>      | Probable cobyrinic acid synthase                                                                                                | 0   | 1   | 1   | 0       | 0  | 1   | 0     | 0 |
| rrnAC1935                                                                        | single hit          | <i>rrnAC1935</i> | Hypothetical protein                                                                                                            | 0   | 1   | 1   | 0       | 0  | 1   | 0     | 0 |
| rrnAC1708                                                                        | ND                  |                  |                                                                                                                                 |     |     |     |         |    |     |       |   |
| rrnAC3087                                                                        | ND                  |                  |                                                                                                                                 |     |     |     |         |    |     |       |   |
| rrnAC1930                                                                        | ND                  |                  |                                                                                                                                 |     |     |     |         |    |     |       |   |
| rrnAC1931                                                                        | ND                  |                  |                                                                                                                                 |     |     |     |         |    |     |       |   |
| <b>00130 Ubiquinone and other terpenoid-quinone biosynthesis [PATH:hma00130]</b> |                     |                  |                                                                                                                                 |     |     |     |         |    |     |       |   |
| rrnAC0841                                                                        | > 2 unique peptides | <i>ech1</i>      | Enoyl-CoA hydratase (EC 4.2.1.17)                                                                                               | 15  | 16  | 31  | 0.94    | 0  | 31  | 0     | 0 |
| rrnAC3151                                                                        | > 2 unique peptides | <i>ubiE1</i>     | Ubiquinone/menaquinone biosynthesis methyltransferase                                                                           | 10  | 12  | 22  | 0.83    | 17 | 5   | 77.27 | 0 |
| rrnAC0845                                                                        | single hit          | <i>menA</i>      | 14-dihydroxy-2-naphthoate octaprenyltransferase                                                                                 | 2   | 1   | 3   | 2       | 3  | 0   | 100   | 7 |
| rrnB0266                                                                         | ND                  |                  |                                                                                                                                 |     |     |     |         |    |     |       |   |
| rrnB0267                                                                         | ND                  |                  |                                                                                                                                 |     |     |     |         |    |     |       |   |
| rrnAC0837                                                                        | ND                  |                  |                                                                                                                                 |     |     |     |         |    |     |       |   |
| rrnAC0838                                                                        | ND                  |                  |                                                                                                                                 |     |     |     |         |    |     |       |   |
| rrnAC0843                                                                        | ND                  |                  |                                                                                                                                 |     |     |     |         |    |     |       |   |
| <b>01110 Biosynthesis of Secondary Metabolites</b>                               |                     |                  |                                                                                                                                 |     |     |     |         |    |     |       |   |
| <b>00900 Terpenoid backbone biosynthesis [PATH:hma00900]</b>                     |                     |                  |                                                                                                                                 |     |     |     |         |    |     |       |   |
| rrnAC3497                                                                        | > 2 unique peptides | <i>yqeF</i>      | Acetyl-coA acetyltransferase (EC 2.3.1.9)                                                                                       | 3   | 1   | 4   | 3       | 0  | 4   | 0     | 0 |
| rrnAC0896                                                                        | > 2 unique peptides | <i>acaB3</i>     | 3-ketoacyl-CoA thiolase (EC 2.3.1.9)                                                                                            | 30  | 16  | 46  | 1.88    | 0  | 46  | 0     | 0 |
| rrnB0242                                                                         | > 2 unique peptides | <i>acaB2</i>     | 3-ketoacyl-CoA thiolase (EC 2.3.1.9) (EC 2.3.1.16)                                                                              | 7   | 5   | 12  | 1.4     | 0  | 12  | 0     | 0 |
| rrnB0240                                                                         | > 2 unique peptides | <i>aca1</i>      | Acetyl-coA acetyltransferase (EC 2.3.1.9)                                                                                       | 31  | 25  | 56  | 1.24    | 2  | 54  | 3.57  | 0 |
| rrnAC0081                                                                        | > 2 unique peptides | <i>idsA</i>      | Geranylgeranyl diphosphate synthase (EC 2.5.1.1) (EC 2.5.1.10)                                                                  | 19  | 16  | 35  | 1.19    | 0  | 35  | 0     | 0 |
| rrnAC2815                                                                        | > 2 unique peptides | <i>aca2</i>      | Acetyl-coA acetyltransferase (EC 2.3.1.9)                                                                                       | 57  | 51  | 108 | 1.12    | 2  | 106 | 1.85  | 0 |
| rrnB0309                                                                         | > 2 unique peptides | <i>acaB1</i>     | 3-ketoacyl-CoA thiolase (EC 2.3.1.9)                                                                                            | 2   | 2   | 4   | 1       | 0  | 4   | 0     | 0 |
| rrnAC1489                                                                        | > 2 unique peptides | <i>dmd</i>       | Diphosphomevalonate decarboxylase (EC 4.1.1.33)                                                                                 | 8   | 8   | 16  | 1       | 1  | 15  | 6.25  | 0 |
| rrnAC3484                                                                        | > 2 unique peptides | <i>idi</i>       | Isopentenyl-diphosphate Delta-isomerase (EC 5.3.3.2) (IPP isomerase)(Isopentenyl pyrophosphate isomerase) (IPP:DMAPP isomerase) | 7   | 9   | 16  | 0.78    | 0  | 16  | 0     | 0 |
| rrnAC0077                                                                        | > 2 unique peptides | <i>mvk</i>       | Mevalonate kinase (EC 2.7.1.36)                                                                                                 | 3   | 4   | 7   | 0.75    | 0  | 7   | 0     | 0 |
| rrnAC1740                                                                        | > 2 unique peptides | <i>mvaS</i>      | Hydroxymethylglutaryl-CoA synthase (EC 2.3.3.10)                                                                                | 1   | 10  | 11  | 0.1     | 0  | 11  | 0     | 0 |
| rrnAC1932                                                                        | ND                  |                  |                                                                                                                                 |     |     |     |         |    |     |       |   |
| rrnAC3412                                                                        | ND                  |                  |                                                                                                                                 |     |     |     |         |    |     |       |   |
| rrnAC1716                                                                        | ND                  |                  |                                                                                                                                 |     |     |     |         |    |     |       |   |
| <b>00903 Limonene and pinene degradation [PATH:hma00903]</b>                     |                     |                  |                                                                                                                                 |     |     |     |         |    |     |       |   |
| rrnB0254                                                                         | > 2 unique peptides | <i>ech6</i>      | Enoyl-CoA hydratase (EC 4.2.1.17)                                                                                               | 6   | 3   | 9   | 2       | 0  | 9   | 0     | 0 |

|                                                                      |                     |               |                                                                                              |     |     |     |      |    |     |       |   |
|----------------------------------------------------------------------|---------------------|---------------|----------------------------------------------------------------------------------------------|-----|-----|-----|------|----|-----|-------|---|
| pNG7088                                                              | > 2 unique peptides | <i>gad</i>    | Quinohemoprotein alcohol dehydrogenase (EC 1.1.99.-)                                         | 17  | 9   | 26  | 1.89 | 26 | 0   | 100   | 0 |
| rrnAC1979                                                            | > 2 unique peptides | <i>ech5</i>   | Enoyl-CoA hydratase/isomerase (EC 4.2.1.17)                                                  | 4   | 4   | 8   | 1    | 0  | 8   | 0     | 0 |
| rrnAC1083                                                            | > 2 unique peptides | <i>hbd1</i>   | 3-hydroxyacyl-CoA dehydrogenase (EC 1.1.1.35) (EC 4.2.1.17)                                  | 122 | 136 | 258 | 0.9  | 6  | 252 | 2.33  | 0 |
| rrnAC1982                                                            | > 2 unique peptides | <i>hbd2</i>   | 3-hydroxybutyryl-CoA dehydrogenase (EC 1.1.1.35) (EC 4.2.1.17)                               | 17  | 22  | 39  | 0.77 | 0  | 39  | 0     | 0 |
| rrnB0246                                                             | > 2 unique peptides | <i>aldY5</i>  | Aldehyde dehydrogenase (EC 1.2.1.3)                                                          | 47  | 62  | 109 | 0.76 | 1  | 108 | 0.92  | 0 |
| rrnAC3036                                                            | > 2 unique peptides | <i>aldY3</i>  | Aldehyde dehydrogenase                                                                       | 10  | 16  | 26  | 0.63 | 0  | 26  | 0     | 0 |
| rrnAC2473                                                            | > 2 unique peptides | <i>aldY2</i>  | Aldehyde dehydrogenase (EC 1.2.1.3)                                                          | 83  | 140 | 223 | 0.59 | 17 | 206 | 7.62  | 0 |
| rrnAC0833                                                            | > 2 unique peptides | <i>ech2</i>   | Enoyl-CoA hydratase (EC 4.2.1.17)                                                            | 13  | 23  | 36  | 0.57 | 3  | 33  | 8.33  | 0 |
| rrnAC1973                                                            | > 2 unique peptides | <i>aldY4</i>  | Aldehyde dehydrogenase (EC 1.2.1.3)                                                          | 21  | 42  | 63  | 0.5  | 1  | 62  | 1.59  | 0 |
| rrnAC2484                                                            | > 2 unique peptides | <i>ech3</i>   | Enoyl-CoA hydratase (EC 4.2.1.17)                                                            | 2   | 4   | 6   | 0.5  | 0  | 6   | 0     | 0 |
| rrnAC0201                                                            | > 2 unique peptides | <i>aldY2</i>  | Aldehyde dehydrogenase (EC 1.2.1.3)                                                          | 39  | 94  | 133 | 0.41 | 12 | 121 | 9.02  | 0 |
| rrnAC1925                                                            | > 2 unique peptides | <i>mhpC</i>   | 2-hydroxy-6-ketono-2,4-dienedioic acid hydrolase (EC 3.7.1.-)                                | 5   | 17  | 22  | 0.29 | 22 | 0   | 100   | 0 |
| rrnB0237                                                             | > 2 unique peptides | <i>ech4</i>   | Enoyl-CoA hydratase (EC 4.2.1.17)                                                            | 1   | 6   | 7   | 0.17 | 0  | 7   | 0     | 0 |
| rrnAC2874                                                            | single hit          | <i>phaJ1</i>  | (R)-specific enoyl-CoA hydratase (EC 4.2.1.-)                                                | 0   | 1   | 1   | 0    | 0  | 1   | 0     | 0 |
| pNG7352                                                              | ND                  |               |                                                                                              |     |     |     |      |    |     |       |   |
| rrnAC2631                                                            | ND                  |               |                                                                                              |     |     |     |      |    |     |       |   |
| rrnB0092                                                             | ND                  |               |                                                                                              |     |     |     |      |    |     |       |   |
| rrnB0095                                                             | ND                  |               |                                                                                              |     |     |     |      |    |     |       |   |
| rrnAC1384                                                            | ND                  |               |                                                                                              |     |     |     |      |    |     |       |   |
| <b>00906 Carotenoid biosynthesis [PATH:hma00906]</b>                 |                     |               |                                                                                              |     |     |     |      |    |     |       |   |
| rrnAC2069                                                            | > 2 unique peptides | <i>crtB</i>   | Phytoene synthase (EC 2.5.1.32) (EC 2.5.1.21)                                                | 8   | 5   | 13  | 1.6  | 13 | 0   | 100   | 0 |
| rrnAC0321                                                            | > 2 unique peptides | <i>crtI2</i>  | Phytoene dehydrogenase (EC 1.3.99.-)                                                         | 1   | 2   | 3   | 0.5  | 3  | 0   | 100   | 0 |
| <b>00311 Penicillin and cephalosporin biosynthesis</b>               |                     |               |                                                                                              |     |     |     |      |    |     |       |   |
| rrnB0229                                                             | ND                  |               |                                                                                              |     |     |     |      |    |     |       |   |
| rrnB0230                                                             | ND                  |               |                                                                                              |     |     |     |      |    |     |       |   |
| <b>00521 Streptomycin biosynthesis [PATH:hma00521]</b>               |                     |               |                                                                                              |     |     |     |      |    |     |       |   |
| rrnAC0633                                                            | > 2 unique peptides | <i>rffH2</i>  | Glucose-1-phosphate thymidyltransferase (EC 2.7.7.24)                                        | 35  | 23  | 58  | 1.52 | 0  | 58  | 0     | 0 |
| rrnAC1004                                                            | > 2 unique peptides | <i>suhB1</i>  | Inositol-1-monophosphatase (EC 3.1.3.25)                                                     | 3   | 2   | 5   | 1.5  | 0  | 5   | 0     | 0 |
| rrnAC2178                                                            | > 2 unique peptides | <i>rfbB3</i>  | DTDP-glucose-4,6-dehydratase (EC 4.2.1.46)                                                   | 4   | 3   | 7   | 1.33 | 7  | 0   | 100   | 0 |
| rrnAC1572                                                            | > 2 unique peptides | <i>rfbB2</i>  | DTDP-glucose-4,6-dehydratase (EC 4.2.1.46)                                                   | 27  | 23  | 50  | 1.17 | 2  | 48  | 4     | 0 |
| rrnAC2522                                                            | > 2 unique peptides | <i>manB3</i>  | Phosphoglucomutase/phosphomannomutase (EC 5.4.2.2) (EC 5.4.2.8)                              | 15  | 13  | 28  | 1.15 | 0  | 28  | 0     | 0 |
| rrnAC1011                                                            | > 2 unique peptides | <i>rffG</i>   | DTDP-glucose dehydratase (EC 4.2.1.46)                                                       | 3   | 4   | 7   | 0.75 | 1  | 6   | 14.29 | 0 |
| rrnAC1010                                                            | > 2 unique peptides | <i>rfbB1</i>  | DTDP-glucose 4-6-dehydratase (EC 4.2.1.46)                                                   | 29  | 39  | 68  | 0.74 | 13 | 55  | 19.12 | 0 |
| rrnAC0444                                                            | > 2 unique peptides | <i>manB2</i>  | Phosphoglucomutase/phosphomannomutase (EC 5.4.2.2) (EC 5.4.2.8)                              | 18  | 25  | 43  | 0.72 | 0  | 43  | 0     | 0 |
| rrnAC2568                                                            | > 2 unique peptides | <i>pmm</i>    | Phosphoglucomutase/phosphomannomutase (EC 5.4.2.2) (EC 5.4.2.8)                              | 22  | 37  | 59  | 0.59 | 3  | 56  | 5.08  | 0 |
| rrnAC3238                                                            | > 2 unique peptides | <i>rffH3</i>  | Glucose-1-phosphate thymidyltransferase (EC 2.7.7.24)                                        | 10  | 18  | 28  | 0.56 | 3  | 25  | 10.71 | 0 |
| rrnAC1960                                                            | > 2 unique peptides | <i>graD4b</i> | Glucose-1-phosphate thymidyltransferase                                                      | 7   | 13  | 20  | 0.54 | 0  | 20  | 0     | 0 |
| rrnAC3232                                                            | > 2 unique peptides | <i>graD4c</i> | Glucose-1-phosphate thymidyltransferase                                                      | 3   | 7   | 10  | 0.43 | 0  | 10  | 0     | 0 |
| rrnAC2574                                                            | single hit          | <i>manB1</i>  | Phosphoglucomutase/phosphomannomutase (EC 5.4.2.2) (EC 5.4.2.8)                              | 2   | 1   | 3   | 2    | 0  | 3   | 0     | 0 |
| rrnAC0547                                                            | single hit          | <i>glcK</i>   | Glucokinase (EC 2.7.1.2)                                                                     | 0   | 1   | 1   | 0    | 0  | 1   | 0     | 0 |
| rrnB0102                                                             | single hit          | <i>suhB2</i>  | Inositol-1-monophosphatase (EC 3.1.3.25)                                                     | 0   | 1   | 1   | 0    | 0  | 1   | 0     | 0 |
| pNG7218                                                              | ND                  |               |                                                                                              |     |     |     |      |    |     |       |   |
| rrnAC2343                                                            | ND                  |               |                                                                                              |     |     |     |      |    |     |       |   |
| <b>00253 Tetracycline biosynthesis</b>                               |                     |               |                                                                                              |     |     |     |      |    |     |       |   |
| rrnAC0903                                                            | > 2 unique peptides | <i>accA</i>   | Acetyl-CoA carboxylase alpha subunit                                                         | 16  | 12  | 28  | 1.33 | 0  | 28  | 0     | 0 |
| <b>00401 Novobiocin biosynthesis [PATH:hma00401]</b>                 |                     |               |                                                                                              |     |     |     |      |    |     |       |   |
| rrnB0206                                                             | > 2 unique peptides | <i>aspC1</i>  | Aspartate aminotransferase (EC 2.6.1.1)                                                      | 28  | 6   | 34  | 4.67 | 4  | 30  | 11.76 | 0 |
| rrnAC3495                                                            | > 2 unique peptides | <i>aspB2</i>  | Aspartate aminotransferase (EC 2.6.1.1)                                                      | 26  | 20  | 46  | 1.3  | 1  | 45  | 2.17  | 0 |
| rrnAC0529                                                            | > 2 unique peptides | <i>hisC</i>   | Histidinol-phosphate aminotransferase (EC 2.6.1.9) (Imidazole acetol-phosphate transaminase) | 6   | 7   | 13  | 0.86 | 0  | 13  | 0     | 0 |
| rrnAC1434                                                            | > 2 unique peptides | <i>aspC3</i>  | Aspartate aminotransferase (EC 2.6.1.1)                                                      | 10  | 31  | 41  | 0.32 | 0  | 41  | 0     | 0 |
| rrnAC0512                                                            | ND                  |               |                                                                                              |     |     |     |      |    |     |       |   |
| rrnAC1934                                                            | ND                  |               |                                                                                              |     |     |     |      |    |     |       |   |
| <b>01111 Xenobiotics Biodegradation and Metabolism</b>               |                     |               |                                                                                              |     |     |     |      |    |     |       |   |
| <b>00930 Caprolactam degradation [PATH:hma00930]</b>                 |                     |               |                                                                                              |     |     |     |      |    |     |       |   |
| rrnB0254                                                             | > 2 unique peptides | <i>ech6</i>   | Enoyl-CoA hydratase (EC 4.2.1.17)                                                            | 6   | 3   | 9   | 2    | 0  | 9   | 0     | 0 |
| rrnAC1979                                                            | > 2 unique peptides | <i>ech5</i>   | Enoyl-CoA hydratase/isomerase (EC 4.2.1.17)                                                  | 4   | 4   | 8   | 1    | 0  | 8   | 0     | 0 |
| rrnAC1083                                                            | > 2 unique peptides | <i>hbd1</i>   | 3-hydroxyacyl-CoA dehydrogenase (EC 1.1.1.35) (EC 4.2.1.17)                                  | 122 | 136 | 258 | 0.9  | 6  | 252 | 2.33  | 0 |
| rrnAC1982                                                            | > 2 unique peptides | <i>hbd2</i>   | 3-hydroxybutyryl-CoA dehydrogenase (EC 1.1.1.35) (EC 4.2.1.17)                               | 17  | 22  | 39  | 0.77 | 0  | 39  | 0     | 0 |
| rrnB0238                                                             | > 2 unique peptides | <i>hbd3</i>   | 3-hydroxyacyl-CoA dehydrogenase (EC 1.1.1.35)                                                | 9   | 14  | 23  | 0.64 | 4  | 19  | 17.39 | 0 |
| rrnAC0833                                                            | > 2 unique peptides | <i>ech2</i>   | Enoyl-CoA hydratase (EC 4.2.1.17)                                                            | 13  | 23  | 36  | 0.57 | 3  | 33  | 8.33  | 0 |
| rrnAC0771                                                            | > 2 unique peptides | <i>paaH</i>   | 3-hydroxybutyryl-CoA dehydrogenase (EC 1.1.1.35)                                             | 31  | 58  | 89  | 0.53 | 0  | 89  | 0     | 0 |
| rrnAC2484                                                            | > 2 unique peptides | <i>ech3</i>   | Enoyl-CoA hydratase (EC 4.2.1.17)                                                            | 2   | 4   | 6   | 0.5  | 0  | 6   | 0     | 0 |
| rrnAC0264                                                            | > 2 unique peptides | <i>hbd-1</i>  | 3-hydroxyacyl-CoA dehydrogenase (EC 1.1.1.35)                                                | 2   | 4   | 6   | 0.5  | 0  | 6   | 0     | 0 |
| rrnAC1925                                                            | > 2 unique peptides | <i>mhpC</i>   | 2-hydroxy-6-ketono-2,4-dienedioic acid hydrolase (EC 3.7.1.-)                                | 5   | 17  | 22  | 0.29 | 22 | 0   | 100   | 0 |
| rrnB0237                                                             | > 2 unique peptides | <i>ech4</i>   | Enoyl-CoA hydratase (EC 4.2.1.17)                                                            | 1   | 6   | 7   | 0.17 | 0  | 7   | 0     | 0 |
| pNG7101                                                              | ND                  |               |                                                                                              |     |     |     |      |    |     |       |   |
| <b>00361 gamma-Hexachlorocyclohexane degradation [PATH:hma00361]</b> |                     |               |                                                                                              |     |     |     |      |    |     |       |   |
| rrnAC0073                                                            | > 2 unique peptides | <i>cyc</i>    | Cytochrome P450 (EC 1.14.14.1) (EC 1.6.2.4)                                                  | 1   | 2   | 3   | 0.5  | 1  | 2   | 33.33 | 0 |
| rrnAC3312                                                            | > 2 unique peptides | <i>cyp1</i>   | Cytochrome P450 (EC 1.14.14.1) (EC 1.6.2.4)                                                  | 1   | 3   | 4   | 0.33 | 4  | 0   | 100   | 0 |
| rrnAC0241                                                            | > 2 unique peptides | <i>hadL</i>   | 2-haloalkanoic acid dehalogenase (EC 3.8.1.2)                                                | 1   | 3   | 4   | 0.33 | 0  | 4   | 0     | 0 |



|                                                                              |                     |                  |                                                                   |     |     |            |         |     |     |       |   |  |
|------------------------------------------------------------------------------|---------------------|------------------|-------------------------------------------------------------------|-----|-----|------------|---------|-----|-----|-------|---|--|
| <b>00641 3-Chloroacrylic acid degradation [PATH:hma00641]</b>                |                     |                  |                                                                   |     |     |            |         |     |     |       |   |  |
| rrnAC0012                                                                    | > 2 unique peptides | <i>adh11</i>     | Zinc-binding dehydrogenase (EC 1.1.1.1) (EC 1.6.5.5)              | 18  | 17  | <b>35</b>  | 1.06    | 1   | 34  | 2.86  | 0 |  |
| rrnB0246                                                                     | > 2 unique peptides | <i>aldY5</i>     | Aldehyde dehydrogenase (EC 1.2.1.3)                               | 47  | 62  | <b>109</b> | 0.76    | 1   | 108 | 0.92  | 0 |  |
| pNG7289                                                                      | > 2 unique peptides | <i>adh6</i>      | Zinc-binding dehydrogenase (EC 1.1.1.1) (EC 1.6.5.5)              | 9   | 13  | <b>22</b>  | 0.69    | 0   | 22  | 0     | 0 |  |
| rrnAC1402                                                                    | > 2 unique peptides | <i>adh4</i>      | Alcohol dehydrogenase (EC 1.1.1.1)                                | 5   | 8   | <b>13</b>  | 0.63    | 0   | 13  | 0     | 0 |  |
| rrnAC3036                                                                    | > 2 unique peptides | <i>aldY3</i>     | Aldehyde dehydrogenase                                            | 10  | 16  | <b>26</b>  | 0.63    | 0   | 26  | 0     | 0 |  |
| rrnAC2473                                                                    | > 2 unique peptides | <i>aldY2</i>     | Aldehyde dehydrogenase (EC 1.2.1.3)                               | 83  | 140 | <b>223</b> | 0.59    | 17  | 206 | 7.62  | 0 |  |
| pNG7278                                                                      | > 2 unique peptides | <i>adh12</i>     | Alcohol dehydrogenase (EC 1.1.1.1)                                | 4   | 7   | <b>11</b>  | 0.57    | 0   | 11  | 0     | 0 |  |
| rrnAC0191                                                                    | > 2 unique peptides | <i>adh3</i>      | Zinc-binding dehydrogenase (EC 1.1.1.1) (EC 1.6.5.5)              | 6   | 11  | <b>17</b>  | 0.55    | 1   | 16  | 5.88  | 0 |  |
| rrnAC1973                                                                    | > 2 unique peptides | <i>aldY4</i>     | Aldehyde dehydrogenase (EC 1.2.1.3)                               | 21  | 42  | <b>63</b>  | 0.5     | 1   | 62  | 1.59  | 0 |  |
| rrnAC0201                                                                    | > 2 unique peptides | <i>aldY2</i>     | Aldehyde dehydrogenase (EC 1.2.1.3)                               | 39  | 94  | <b>133</b> | 0.41    | 12  | 121 | 9.02  | 0 |  |
| pNG7032                                                                      | > 2 unique peptides | <i>adh10</i>     | Zinc-binding dehydrogenase (EC 1.1.1.1) (EC 1.6.5.5)              | 0   | 3   | <b>3</b>   | 0       | 0   | 3   | 0     | 0 |  |
| pNG7314                                                                      | single hit          | <i>adhC</i>      | Formaldehyde dehydrogenase (EC 1.1.1.1)                           | 1   | 1   | <b>2</b>   | 1       | 0   | 2   | 0     | 0 |  |
| pNG7351                                                                      | single hit          | <i>adh13</i>     | Zinc-binding dehydrogenase (EC 1.1.1.1) (EC 1.6.5.5)              | 0   | 2   | <b>2</b>   | 0       | 0   | 2   | 0     | 0 |  |
| pNG7022                                                                      | ND                  |                  |                                                                   |     |     |            |         |     |     |       |   |  |
| pNG7101                                                                      | ND                  |                  |                                                                   |     |     |            |         |     |     |       |   |  |
| pNG7103                                                                      | ND                  |                  |                                                                   |     |     |            |         |     |     |       |   |  |
| rrnAC1300                                                                    | ND                  |                  |                                                                   |     |     |            |         |     |     |       |   |  |
| rrnAC1975                                                                    | ND                  |                  |                                                                   |     |     |            |         |     |     |       |   |  |
| rrnAC2172                                                                    | ND                  |                  |                                                                   |     |     |            |         |     |     |       |   |  |
| rrnAC3506                                                                    | ND                  |                  |                                                                   |     |     |            |         |     |     |       |   |  |
| pNG7352                                                                      | ND                  |                  |                                                                   |     |     |            |         |     |     |       |   |  |
| rrnAC2631                                                                    | ND                  |                  |                                                                   |     |     |            |         |     |     |       |   |  |
| rrnB0092                                                                     | ND                  |                  |                                                                   |     |     |            |         |     |     |       |   |  |
| rrnB0095                                                                     | ND                  |                  |                                                                   |     |     |            |         |     |     |       |   |  |
| <b>00351 1,1,1-Trichloro-2,2-bis(4-chlorophenyl)ethane (DDT) degradation</b> |                     |                  |                                                                   |     |     |            |         |     |     |       |   |  |
| rrnAC1925                                                                    | > 2 unique peptides | <i>mhpC</i>      | 2-hydroxy-6-ketono-2,4-dienedioic acid hydrolase (EC 3.7.1.-)     | 5   | 17  | <b>22</b>  | 0.29    | 22  | 0   | 100   | 0 |  |
| <b>00623 2,4-Dichlorobenzoate degradation</b>                                |                     |                  |                                                                   |     |     |            |         |     |     |       |   |  |
| rrnAC0359                                                                    | > 2 unique peptides | <i>rrnAC0359</i> | 4-hydroxybenzoate 3-monooxygenase (EC 1.14.13.2)                  | 8   | 8   | <b>16</b>  | 1       | 16  | 0   | 100   | 0 |  |
| rrnAC0657                                                                    | > 2 unique peptides | <i>rrnAC0657</i> | P-hydroxybenzoate hydroxylase (EC 1.14.13.2)                      | 4   | 6   | <b>10</b>  | 0.67    | 9   | 1   | 90    | 0 |  |
| <b>00631 1,2-Dichloroethane degradation [PATH:hma00631]</b>                  |                     |                  |                                                                   |     |     |            |         |     |     |       |   |  |
| rrnB0246                                                                     | > 2 unique peptides | <i>aldY5</i>     | Aldehyde dehydrogenase (EC 1.2.1.3)                               | 47  | 62  | <b>109</b> | 0.76    | 1   | 108 | 0.92  | 0 |  |
| rrnAC3036                                                                    | > 2 unique peptides | <i>aldY3</i>     | Aldehyde dehydrogenase                                            | 10  | 16  | <b>26</b>  | 0.63    | 0   | 26  | 0     | 0 |  |
| rrnAC2473                                                                    | > 2 unique peptides | <i>aldY2</i>     | Aldehyde dehydrogenase (EC 1.2.1.3)                               | 83  | 140 | <b>223</b> | 0.59    | 17  | 206 | 7.62  | 0 |  |
| rrnAC1973                                                                    | > 2 unique peptides | <i>aldY4</i>     | Aldehyde dehydrogenase (EC 1.2.1.3)                               | 21  | 42  | <b>63</b>  | 0.5     | 1   | 62  | 1.59  | 0 |  |
| rrnAC0201                                                                    | > 2 unique peptides | <i>aldY2</i>     | Aldehyde dehydrogenase (EC 1.2.1.3)                               | 39  | 94  | <b>133</b> | 0.41    | 12  | 121 | 9.02  | 0 |  |
| rrnAC0241                                                                    | > 2 unique peptides | <i>hadL</i>      | 2-haloalkanoic acid dehalogenase (EC 3.8.1.2)                     | 1   | 3   | <b>4</b>   | 0.33    | 0   | 4   | 0     | 0 |  |
| pNG7352                                                                      | ND                  |                  |                                                                   |     |     |            |         |     |     |       |   |  |
| rrnAC2631                                                                    | ND                  |                  |                                                                   |     |     |            |         |     |     |       |   |  |
| rrnB0092                                                                     | ND                  |                  |                                                                   |     |     |            |         |     |     |       |   |  |
| rrnB0095                                                                     | ND                  |                  |                                                                   |     |     |            |         |     |     |       |   |  |
| <b>00625 Tetrachloroethene degradation</b>                                   |                     |                  |                                                                   |     |     |            |         |     |     |       |   |  |
| pNG7012                                                                      | ND                  |                  |                                                                   |     |     |            |         |     |     |       |   |  |
| <b>00643 Styrene degradation</b>                                             |                     |                  |                                                                   |     |     |            |         |     |     |       |   |  |
| pNG7354                                                                      | ND                  |                  |                                                                   |     |     |            |         |     |     |       |   |  |
| <b>00626 Naphthalene and anthracene degradation [PATH:hma00626]</b>          |                     |                  |                                                                   |     |     |            |         |     |     |       |   |  |
| rrnAC1384                                                                    | ND                  |                  |                                                                   |     |     |            |         |     |     |       |   |  |
| rrnAC0542                                                                    | ND                  |                  |                                                                   |     |     |            |         |     |     |       |   |  |
| rrnAC3101                                                                    | ND                  |                  |                                                                   |     |     |            |         |     |     |       |   |  |
| <b>00642 Ethylbenzene degradation</b>                                        |                     |                  |                                                                   |     |     |            |         |     |     |       |   |  |
| rrnB0242                                                                     | > 2 unique peptides | <i>acaB2</i>     | 3-ketoacyl-CoA thiolase (EC 2.3.1.9) (EC 2.3.1.16)                | 7   | 5   | <b>12</b>  | 1.4     | 0   | 12  | 0     | 0 |  |
| rrnAC0929                                                                    | > 2 unique peptides | <i>acaB4</i>     | 3-ketoacyl-CoA thiolase (EC 2.3.1.16)                             | 1   | 10  | <b>11</b>  | 0.1     | 0   | 11  | 0     | 0 |  |
| <b>00632 Benzoate degradation via CoA ligation [PATH:hma00632]</b>           |                     |                  |                                                                   |     |     |            |         |     |     |       |   |  |
| rrnAC1092                                                                    | > 2 unique peptides | <i>rrnAC1092</i> | Hypothetical protein                                              | 3   | 0   | <b>3</b>   | #DIV/0! | 3   | 0   | 100   | 3 |  |
| rrnAC3497                                                                    | > 2 unique peptides | <i>yqeF</i>      | Acetyl-coA acetyltransferase (EC 2.3.1.9)                         | 3   | 1   | <b>4</b>   | 3       | 0   | 4   | 0     | 0 |  |
| rrnB0254                                                                     | > 2 unique peptides | <i>ech6</i>      | Enoyl-CoA hydratase (EC 4.2.1.17)                                 | 6   | 3   | <b>9</b>   | 2       | 0   | 9   | 0     | 0 |  |
| rrnAC0896                                                                    | > 2 unique peptides | <i>acaB3</i>     | 3-ketoacyl-CoA thiolase (EC 2.3.1.9)                              | 30  | 16  | <b>46</b>  | 1.88    | 0   | 46  | 0     | 0 |  |
| rrnB0242                                                                     | > 2 unique peptides | <i>acaB2</i>     | 3-ketoacyl-CoA thiolase (EC 2.3.1.9) (EC 2.3.1.16)                | 7   | 5   | <b>12</b>  | 1.4     | 0   | 12  | 0     | 0 |  |
| rrnB0240                                                                     | > 2 unique peptides | <i>aca1</i>      | Acetyl-coA acetyltransferase (EC 2.3.1.9)                         | 31  | 25  | <b>56</b>  | 1.24    | 2   | 54  | 3.57  | 0 |  |
| rrnAC2815                                                                    | > 2 unique peptides | <i>aca2</i>      | Acetyl-coA acetyltransferase (EC 2.3.1.9)                         | 57  | 51  | <b>108</b> | 1.12    | 2   | 106 | 1.85  | 0 |  |
| rrnAC1979                                                                    | > 2 unique peptides | <i>ech5</i>      | Enoyl-CoA hydratase/isomerase (EC 4.2.1.17)                       | 4   | 4   | <b>8</b>   | 1       | 0   | 8   | 0     | 0 |  |
| rrnB0309                                                                     | > 2 unique peptides | <i>acaB1</i>     | 3-ketoacyl-CoA thiolase (EC 2.3.1.9)                              | 2   | 2   | <b>4</b>   | 1       | 0   | 4   | 0     | 0 |  |
| rrnAC1083                                                                    | > 2 unique peptides | <i>hbd1</i>      | 3-hydroxyacyl-CoA dehydrogenase (EC 1.1.1.35) (EC 4.2.1.17)       | 122 | 136 | <b>258</b> | 0.9     | 6   | 252 | 2.33  | 0 |  |
| rrnAC1093                                                                    | > 2 unique peptides | <i>sdhB</i>      | Succinate dehydrogenase iron-sulfur protein subunit (EC 1.3.99.1) | 72  | 83  | <b>155</b> | 0.87    | 153 | 2   | 98.71 | 0 |  |
| rrnAC1982                                                                    | > 2 unique peptides | <i>hbd2</i>      | 3-hydroxybutyryl-CoA dehydrogenase (EC 1.1.1.35) (EC 4.2.1.17)    | 17  | 22  | <b>39</b>  | 0.77    | 0   | 39  | 0     | 0 |  |
| rrnAC1972                                                                    | > 2 unique peptides | <i>gcdH</i>      | Glutaryl-CoA dehydrogenase (EC 1.3.99.7)                          | 46  | 63  | <b>109</b> | 0.73    | 3   | 106 | 2.75  | 0 |  |
| rrnAC1097                                                                    | > 2 unique peptides | <i>sdhA1</i>     | Succinate dehydrogenase flavoprotein subunit (EC 1.3.99.1)        | 121 | 180 | <b>301</b> | 0.67    | 292 | 9   | 97.01 | 0 |  |
| rrnAC0833                                                                    | > 2 unique peptides | <i>ech2</i>      | Enoyl-CoA hydratase (EC 4.2.1.17)                                 | 13  | 23  | <b>36</b>  | 0.57    | 3   | 33  | 8.33  | 0 |  |
| rrnAC2484                                                                    | > 2 unique peptides | <i>ech3</i>      | Enoyl-CoA hydratase (EC 4.2.1.17)                                 | 2   | 4   | <b>6</b>   | 0.5     | 0   | 6   | 0     | 0 |  |
| rrnAC1925                                                                    | > 2 unique peptides | <i>mhpC</i>      | 2-hydroxy-6-ketono-2,4-dienedioic acid hydrolase (EC 3.7.1.-)     | 5   | 17  | <b>22</b>  | 0.29    | 22  | 0   | 100   | 0 |  |
| rrnB0237                                                                     | > 2 unique peptides | <i>ech4</i>      | Enoyl-CoA hydratase (EC 4.2.1.17)                                 | 1   | 6   | <b>7</b>   | 0.17    | 0   | 7   | 0     | 0 |  |

|                                                                     |                     |                  |                                                                |     |     |     |      |    |     |       |   |
|---------------------------------------------------------------------|---------------------|------------------|----------------------------------------------------------------|-----|-----|-----|------|----|-----|-------|---|
| rrnAC2874                                                           | single hit          | <i>phaJ1</i>     | (R)-specific enoyl-CoA hydratase (EC 4.2.1.-)                  | 0   | 1   | 1   | 0    | 0  | 1   | 0     | 0 |
| rrnAC0141                                                           | single hit          | <i>sdhA2</i>     | Succinate dehydrogenase flavoprotein subunit (EC 1.3.99.1)     | 0   | 3   | 3   | 0    | 0  | 3   | 0     | 0 |
| pNG7354                                                             | ND                  |                  |                                                                |     |     |     |      |    |     |       |   |
| rrnAC1167                                                           | ND                  |                  |                                                                |     |     |     |      |    |     |       |   |
| rrnAC1091                                                           | ND                  |                  |                                                                |     |     |     |      |    |     |       |   |
| <b>00362 Benzoate degradation via hydroxylation [PATH:hma00362]</b> |                     |                  |                                                                |     |     |     |      |    |     |       |   |
| pNG7088                                                             | > 2 unique peptides | <i>gad</i>       | Quinohemoprotein alcohol dehydrogenase (EC 1.1.99.-)           | 17  | 9   | 26  | 1.89 | 26 | 0   | 100   | 0 |
| rrnB0242                                                            | > 2 unique peptides | <i>acaB2</i>     | 3-ketoacyl-CoA thiolase (EC 2.3.1.9) (EC 2.3.1.16)             | 7   | 5   | 12  | 1.4  | 0  | 12  | 0     | 0 |
| rrnAC0359                                                           | > 2 unique peptides | <i>rrnAC0359</i> | 4-hydroxybenzoate 3-monooxygenase (EC 1.14.13.2)               | 8   | 8   | 16  | 1    | 16 | 0   | 100   | 0 |
| rrnAC0657                                                           | > 2 unique peptides | <i>rrnAC0657</i> | P-hydroxybenzoate hydroxylase (EC 1.14.13.2)                   | 4   | 6   | 10  | 0.67 | 9  | 1   | 90    | 0 |
| rrnAC1925                                                           | > 2 unique peptides | <i>mhpC</i>      | 2-hydroxy-6-ketono-2,4-dienedioic acid hydrolase (EC 3.7.1.-)  | 5   | 17  | 22  | 0.29 | 22 | 0   | 100   | 0 |
| rrnAC0929                                                           | > 2 unique peptides | <i>acaB4</i>     | 3-ketoacyl-CoA thiolase (EC 2.3.1.16)                          | 1   | 10  | 11  | 0.1  | 0  | 11  | 0     | 0 |
| rrnAC2874                                                           | single hit          | <i>phaJ1</i>     | (R)-specific enoyl-CoA hydratase (EC 4.2.1.-)                  | 0   | 1   | 1   | 0    | 0  | 1   | 0     | 0 |
| rrnAC0572                                                           | ND                  |                  |                                                                |     |     |     |      |    |     |       |   |
| <b>00791 Atrazine degradation</b>                                   |                     |                  |                                                                |     |     |     |      |    |     |       |   |
| pNG7124                                                             | ND                  |                  |                                                                |     |     |     |      |    |     |       |   |
| pNG7123                                                             | ND                  |                  |                                                                |     |     |     |      |    |     |       |   |
| pNG7125                                                             | ND                  |                  |                                                                |     |     |     |      |    |     |       |   |
| <b>00363 Bisphenol A degradation</b>                                |                     |                  |                                                                |     |     |     |      |    |     |       |   |
| pNG7012                                                             | ND                  |                  |                                                                |     |     |     |      |    |     |       |   |
| <b>00624 1- and 2-Methylnaphthalene degradation [PATH:hma00624]</b> |                     |                  |                                                                |     |     |     |      |    |     |       |   |
| rrnAC1261                                                           | > 2 unique peptides | <i>acdD</i>      | Acyl-coA dehydrogenase (EC 1.3.99.-)                           | 11  | 3   | 14  | 3.67 | 0  | 14  | 0     | 0 |
| rrnAC0012                                                           | > 2 unique peptides | <i>adh11</i>     | Zinc-binding dehydrogenase (EC 1.1.1.1) (EC 1.6.5.5)           | 18  | 17  | 35  | 1.06 | 1  | 34  | 2.86  | 0 |
| rrnAC0770                                                           | > 2 unique peptides | <i>acdB</i>      | Acyl-coA dehydrogenase (EC 1.3.99.-)                           | 74  | 76  | 150 | 0.97 | 8  | 142 | 5.33  | 0 |
| rrnAC0874                                                           | > 2 unique peptides | <i>acdA</i>      | Acyl-CoA dehydrogenase (EC 1.3.99.-)                           | 20  | 21  | 41  | 0.95 | 0  | 41  | 0     | 0 |
| pNG7289                                                             | > 2 unique peptides | <i>adh6</i>      | Zinc-binding dehydrogenase (EC 1.1.1.1) (EC 1.6.5.5)           | 9   | 13  | 22  | 0.69 | 0  | 22  | 0     | 0 |
| rrnAC1402                                                           | > 2 unique peptides | <i>adh4</i>      | Alcohol dehydrogenase (EC 1.1.1.1)                             | 5   | 8   | 13  | 0.63 | 0  | 13  | 0     | 0 |
| pNG7278                                                             | > 2 unique peptides | <i>adh12</i>     | Alcohol dehydrogenase (EC 1.1.1.1)                             | 4   | 7   | 11  | 0.57 | 0  | 11  | 0     | 0 |
| rrnAC0191                                                           | > 2 unique peptides | <i>adh3</i>      | Zinc-binding dehydrogenase (EC 1.1.1.1) (EC 1.6.5.5)           | 6   | 11  | 17  | 0.55 | 1  | 16  | 5.88  | 0 |
| rrnAC1084                                                           | > 2 unique peptides | <i>acdG</i>      | Acyl-CoA dehydrogenase (EC 1.3.99.-)                           | 2   | 7   | 9   | 0.29 | 0  | 9   | 0     | 0 |
| pNG7032                                                             | > 2 unique peptides | <i>adh10</i>     | Zinc-binding dehydrogenase (EC 1.1.1.1) (EC 1.6.5.5)           | 0   | 3   | 3   | 0    | 0  | 3   | 0     | 0 |
| rrnAC1986                                                           | > 2 unique peptides | <i>acdC</i>      | Acyl-CoA dehydrogenase (EC 1.3.99.-)                           | 0   | 3   | 3   | 0    | 0  | 3   | 0     | 0 |
| pNG7314                                                             | single hit          | <i>adhC</i>      | Formaldehyde dehydrogenase (EC 1.1.1.1)                        | 1   | 1   | 2   | 1    | 0  | 2   | 0     | 0 |
| rrnAC2874                                                           | single hit          | <i>phaJ1</i>     | (R)-specific enoyl-CoA hydratase (EC 4.2.1.-)                  | 0   | 1   | 1   | 0    | 0  | 1   | 0     | 0 |
| pNG7351                                                             | single hit          | <i>adh13</i>     | Zinc-binding dehydrogenase (EC 1.1.1.1) (EC 1.6.5.5)           | 0   | 2   | 2   | 0    | 0  | 2   | 0     | 0 |
| rrnAC1384                                                           | ND                  |                  |                                                                |     |     |     |      |    |     |       |   |
| pNG7022                                                             | ND                  |                  |                                                                |     |     |     |      |    |     |       |   |
| pNG7101                                                             | ND                  |                  |                                                                |     |     |     |      |    |     |       |   |
| pNG7103                                                             | ND                  |                  |                                                                |     |     |     |      |    |     |       |   |
| rrnAC1300                                                           | ND                  |                  |                                                                |     |     |     |      |    |     |       |   |
| rrnAC1975                                                           | ND                  |                  |                                                                |     |     |     |      |    |     |       |   |
| rrnAC2172                                                           | ND                  |                  |                                                                |     |     |     |      |    |     |       |   |
| rrnAC3506                                                           | ND                  |                  |                                                                |     |     |     |      |    |     |       |   |
| rrnAC0779                                                           | ND                  |                  |                                                                |     |     |     |      |    |     |       |   |
| rrnAC0780                                                           | ND                  |                  |                                                                |     |     |     |      |    |     |       |   |
| <b>00633 Trinitrotoluene degradation</b>                            |                     |                  |                                                                |     |     |     |      |    |     |       |   |
| pNG7247                                                             | ND                  |                  |                                                                |     |     |     |      |    |     |       |   |
| <b>00281 Geraniol degradation [PATH:hma00281]</b>                   |                     |                  |                                                                |     |     |     |      |    |     |       |   |
| rrnAC1261                                                           | > 2 unique peptides | <i>acdD</i>      | Acyl-coA dehydrogenase (EC 1.3.99.-)                           | 11  | 3   | 14  | 3.67 | 0  | 14  | 0     | 0 |
| rrnB0254                                                            | > 2 unique peptides | <i>ech6</i>      | Enoyl-CoA hydratase (EC 4.2.1.17)                              | 6   | 3   | 9   | 2    | 0  | 9   | 0     | 0 |
| rrnB0242                                                            | > 2 unique peptides | <i>acaB2</i>     | 3-ketoacyl-CoA thiolase (EC 2.3.1.9) (EC 2.3.1.16)             | 7   | 5   | 12  | 1.4  | 0  | 12  | 0     | 0 |
| rrnAC1979                                                           | > 2 unique peptides | <i>ech5</i>      | Enoyl-CoA hydratase/isomerase (EC 4.2.1.17)                    | 4   | 4   | 8   | 1    | 0  | 8   | 0     | 0 |
| rrnAC0770                                                           | > 2 unique peptides | <i>acdB</i>      | Acyl-coA dehydrogenase (EC 1.3.99.-)                           | 74  | 76  | 150 | 0.97 | 8  | 142 | 5.33  | 0 |
| rrnAC0874                                                           | > 2 unique peptides | <i>acdA</i>      | Acyl-CoA dehydrogenase (EC 1.3.99.-)                           | 20  | 21  | 41  | 0.95 | 0  | 41  | 0     | 0 |
| rrnAC1083                                                           | > 2 unique peptides | <i>hbd1</i>      | 3-hydroxyacyl-CoA dehydrogenase (EC 1.1.1.35) (EC 4.2.1.17)    | 122 | 136 | 258 | 0.9  | 6  | 252 | 2.33  | 0 |
| rrnAC1982                                                           | > 2 unique peptides | <i>hbd2</i>      | 3-hydroxybutyryl-CoA dehydrogenase (EC 1.1.1.35) (EC 4.2.1.17) | 17  | 22  | 39  | 0.77 | 0  | 39  | 0     | 0 |
| rrnB0238                                                            | > 2 unique peptides | <i>hbd3</i>      | 3-hydroxyacyl-CoA dehydrogenase (EC 1.1.1.35)                  | 9   | 14  | 23  | 0.64 | 4  | 19  | 17.39 | 0 |
| rrnAC0833                                                           | > 2 unique peptides | <i>ech2</i>      | Enoyl-CoA hydratase (EC 4.2.1.17)                              | 13  | 23  | 36  | 0.57 | 3  | 33  | 8.33  | 0 |
| rrnAC0771                                                           | > 2 unique peptides | <i>paaH</i>      | 3-hydroxybutyryl-CoA dehydrogenase (EC 1.1.1.35)               | 31  | 58  | 89  | 0.53 | 0  | 89  | 0     | 0 |
| rrnAC2484                                                           | > 2 unique peptides | <i>ech3</i>      | Enoyl-CoA hydratase (EC 4.2.1.17)                              | 2   | 4   | 6   | 0.5  | 0  | 6   | 0     | 0 |
| rrnAC0264                                                           | > 2 unique peptides | <i>hbd-1</i>     | 3-hydroxyacyl-CoA dehydrogenase (EC 1.1.1.35)                  | 2   | 4   | 6   | 0.5  | 0  | 6   | 0     | 0 |
| rrnAC1084                                                           | > 2 unique peptides | <i>acdG</i>      | Acyl-CoA dehydrogenase (EC 1.3.99.-)                           | 2   | 7   | 9   | 0.29 | 0  | 9   | 0     | 0 |
| rrnB0237                                                            | > 2 unique peptides | <i>ech4</i>      | Enoyl-CoA hydratase (EC 4.2.1.17)                              | 1   | 6   | 7   | 0.17 | 0  | 7   | 0     | 0 |
| rrnAC0929                                                           | > 2 unique peptides | <i>acaB4</i>     | 3-ketoacyl-CoA thiolase (EC 2.3.1.16)                          | 1   | 10  | 11  | 0.1  | 0  | 11  | 0     | 0 |
| rrnAC1986                                                           | > 2 unique peptides | <i>acdC</i>      | Acyl-CoA dehydrogenase (EC 1.3.99.-)                           | 0   | 3   | 3   | 0    | 0  | 3   | 0     | 0 |
| rrnAC1384                                                           | ND                  |                  |                                                                |     |     |     |      |    |     |       |   |
| rrnAC0779                                                           | ND                  |                  |                                                                |     |     |     |      |    |     |       |   |
| rrnAC0780                                                           | ND                  |                  |                                                                |     |     |     |      |    |     |       |   |
| <b>00980 Metabolism of xenobiotics by cytochrome P450</b>           |                     |                  |                                                                |     |     |     |      |    |     |       |   |
| rrnAC0012                                                           | > 2 unique peptides | <i>adh11</i>     | Zinc-binding dehydrogenase (EC 1.1.1.1) (EC 1.6.5.5)           | 18  | 17  | 35  | 1.06 | 1  | 34  | 2.86  | 0 |
| pNG7289                                                             | > 2 unique peptides | <i>adh6</i>      | Zinc-binding dehydrogenase (EC 1.1.1.1) (EC 1.6.5.5)           | 9   | 13  | 22  | 0.69 | 0  | 22  | 0     | 0 |



|                                       |                     |                  |                                                                                                         |    |    |     |         |     |    |       |   |   |
|---------------------------------------|---------------------|------------------|---------------------------------------------------------------------------------------------------------|----|----|-----|---------|-----|----|-------|---|---|
| rrnAC1126                             | ND                  |                  |                                                                                                         |    |    |     |         |     |    |       |   |   |
| rrnAC1357                             | ND                  |                  |                                                                                                         |    |    |     |         |     |    |       |   |   |
| rrnAC1875                             | ND                  |                  |                                                                                                         |    |    |     |         |     |    |       |   |   |
| rrnAC2051                             | ND                  |                  |                                                                                                         |    |    |     |         |     |    |       |   |   |
| rrnAC2769                             | ND                  |                  |                                                                                                         |    |    |     |         |     |    |       |   |   |
| rrnB0148                              | ND                  |                  |                                                                                                         |    |    |     |         |     |    |       |   |   |
| <b>03000 Transcription factors</b>    |                     |                  |                                                                                                         |    |    |     |         |     |    |       |   |   |
| rrnAC2744                             | > 2 unique peptides | <i>rrnAC2744</i> | Hypothetical protein                                                                                    | 5  | 3  | 8   | 1.67    | 0   | 8  | 0     | 0 | 0 |
| pNG2007                               | > 2 unique peptides | <i>pNG2007</i>   | Hypothetical protein                                                                                    | 18 | 11 | 29  | 1.64    | 0   | 29 | 0     | 0 | 0 |
| rrnAC1133                             | > 2 unique peptides | <i>rpaA</i>      | Replication protein A                                                                                   | 12 | 17 | 29  | 0.71    | 0   | 29 | 0     | 0 | 0 |
| rrnAC1765                             | > 2 unique peptides | <i>tenA</i>      | Transcriptional activator tenA                                                                          | 3  | 21 | 24  | 0.14    | 1   | 23 | 4.17  | 0 | 0 |
| rrnAC0001                             | > 2 unique peptides | <i>birA</i>      | Biotin-(Acetyl-CoA carboxylase) ligase                                                                  | 0  | 5  | 5   | 0       | 0   | 5  | 0     | 0 | 0 |
| rrnAC1767                             | > 2 unique peptides | <i>tenA-2</i>    | Transcriptional regulator putative                                                                      | 0  | 9  | 9   | 0       | 0   | 9  | 0     | 0 | 0 |
| rrnAC0496                             | single hit          | <i>sirR</i>      | Transcription repressor                                                                                 | 1  | 0  | 1   | #DIV/0! | 0   | 1  | 0     | 0 | 0 |
| rrnAC1715                             | single hit          | <i>cspD1</i>     | Cold shock protein                                                                                      | 1  | 0  | 1   | #DIV/0! | 0   | 1  | 0     | 0 | 0 |
| rrnAC2339                             | single hit          | <i>cspD3</i>     | Cold shock protein                                                                                      | 50 | 12 | 62  | 4.17    | 0   | 62 | 0     | 0 | 0 |
| rrnAC1714                             | single hit          | <i>cspD5</i>     | Cold shock protein                                                                                      | 3  | 1  | 4   | 3       | 0   | 4  | 0     | 0 | 0 |
| rrnAC1269                             | single hit          | <i>asnC2</i>     | Transcription regulator AsnC family                                                                     | 5  | 2  | 7   | 2.5     | 0   | 7  | 0     | 0 | 0 |
| rrnAC3264                             | single hit          | <i>rrnAC3264</i> | Putative molybdenum-binding protein                                                                     | 1  | 2  | 3   | 0.5     | 0   | 3  | 0     | 0 | 0 |
| rrnAC2283                             | single hit          | <i>copG1</i>     | Transcriptional regulator CopG family                                                                   | 0  | 1  | 1   | 0       | 0   | 1  | 0     | 0 | 0 |
| rrnAC2302                             | ND                  |                  |                                                                                                         |    |    |     |         |     |    |       |   |   |
| rrnAC2037                             | ND                  |                  |                                                                                                         |    |    |     |         |     |    |       |   |   |
| rrnAC1238                             | ND                  |                  |                                                                                                         |    |    |     |         |     |    |       |   |   |
| rrnAC3447                             | ND                  |                  |                                                                                                         |    |    |     |         |     |    |       |   |   |
| rrnAC2519                             | ND                  |                  |                                                                                                         |    |    |     |         |     |    |       |   |   |
| rrnAC1742                             | ND                  |                  |                                                                                                         |    |    |     |         |     |    |       |   |   |
| rrnAC2338                             | ND                  |                  |                                                                                                         |    |    |     |         |     |    |       |   |   |
| rrnAC2900                             | ND                  |                  |                                                                                                         |    |    |     |         |     |    |       |   |   |
| <b>01122 Translation</b>              |                     |                  |                                                                                                         |    |    |     |         |     |    |       |   |   |
| <b>03010 Ribosome [PATH:hma03010]</b> |                     |                  |                                                                                                         |    |    |     |         |     |    |       |   |   |
| rrnAC1596                             | > 2 unique peptides | <i>rpl6p</i>     | 50S ribosomal protein L6P (Hmal6) (HI10)                                                                | 5  | 0  | 5   | #DIV/0! | 0   | 5  | 0     | 0 | 0 |
| rrnAC1418                             | > 2 unique peptides | <i>rpl12p</i>    | 50S ribosomal protein L12P (Hmal12)                                                                     | 3  | 0  | 3   | #DIV/0! | 0   | 3  | 0     | 0 | 0 |
| rrnAC1607                             | > 2 unique peptides | <i>rps19p</i>    | 30S ribosomal protein S19P (HmaS19) (HS18)                                                              | 12 | 2  | 14  | 6       | 3   | 11 | 21.43 | 0 | 0 |
| rrnAC1604                             | > 2 unique peptides | <i>rpl29p</i>    | 50S ribosomal protein L29P (Hmal29) (HI33)                                                              | 5  | 1  | 6   | 5       | 0   | 6  | 0     | 0 | 0 |
| rrnAC0059                             | > 2 unique peptides | <i>rps4p</i>     | 30S ribosomal protein S4P (HmaS4)                                                                       | 27 | 7  | 34  | 3.86    | 0   | 34 | 0     | 0 | 0 |
| rrnAC0061                             | > 2 unique peptides | <i>rps11p</i>    | 30S ribosomal protein S11P (HmaS11) (HS19)                                                              | 23 | 6  | 29  | 3.83    | 4   | 25 | 13.79 | 0 | 0 |
| rrnAC1598                             | > 2 unique peptides | <i>rpl5p</i>     | 50S ribosomal protein L5P (Hmal5) (HI13)                                                                | 13 | 4  | 17  | 3.25    | 11  | 6  | 64.71 | 0 | 0 |
| rrnAC0058                             | > 2 unique peptides | <i>rps13p</i>    | 30S ribosomal protein S13P (HmaS13)                                                                     | 21 | 8  | 29  | 2.63    | 6   | 23 | 20.69 | 0 | 0 |
| rrnAC2488                             | > 2 unique peptides | <i>rps24e</i>    | 30S ribosomal protein S24e (HS15) (E1.2)                                                                | 16 | 6  | 22  | 2.67    | 3   | 19 | 13.64 | 0 | 0 |
| rrnAC1605                             | > 2 unique peptides | <i>rps3p</i>     | 30S ribosomal protein S3P (HmaS3) (HS1)                                                                 | 53 | 21 | 74  | 2.52    | 1   | 73 | 1.35  | 0 | 0 |
| rrnAC1417                             | > 2 unique peptides | <i>rplP0</i>     | 50S ribosomal protein L10E (Ribosomal protein L10) (Acidic ribosomalprotein P0 homolog) (L10E) (HMal10) | 17 | 8  | 25  | 2.13    | 3   | 22 | 12    | 0 | 0 |
| rrnAC1429                             | > 2 unique peptides | <i>rps3Ae</i>    | 30S ribosomal protein S3Ae                                                                              | 80 | 39 | 119 | 2.05    | 52  | 67 | 43.7  | 0 | 0 |
| rrnAC1600                             | > 2 unique peptides | <i>rps4e</i>     | 30S ribosomal protein S4E (HS3)                                                                         | 34 | 17 | 51  | 2       | 9   | 42 | 17.65 | 0 | 0 |
| rrnAC2212                             | > 2 unique peptides | <i>rps6e</i>     | 30S ribosomal protein S6e (HS13)                                                                        | 14 | 7  | 21  | 2       | 0   | 21 | 0     | 0 | 0 |
| rrnAC1610                             | > 2 unique peptides | <i>rpl4p</i>     | 50S ribosomal protein L4P (Hmal4) (HI6)                                                                 | 2  | 1  | 3   | 2       | 0   | 3  | 0     | 0 | 0 |
| rrnAC2357                             | > 2 unique peptides | <i>rpl10e</i>    | 50S ribosomal protein L10e                                                                              | 14 | 7  | 21  | 2       | 21  | 0  | 100   | 0 | 0 |
| rrnAC1592                             | > 2 unique peptides | <i>rps5p</i>     | 30S ribosomal protein S5P (HmaS5)                                                                       | 63 | 35 | 98  | 1.8     | 16  | 82 | 16.33 | 0 | 0 |
| rrnAC1611                             | > 2 unique peptides | <i>rpl3p</i>     | 50S ribosomal protein L3P (Hmal3) (HI1)                                                                 | 91 | 57 | 148 | 1.6     | 148 | 0  | 100   | 0 | 0 |
| rrnAC0064                             | > 2 unique peptides | <i>rpl18e</i>    | 50S ribosomal protein L18e (HI29) (L19)                                                                 | 41 | 26 | 67  | 1.58    | 63  | 4  | 94.03 | 0 | 0 |
| rrnAC1595                             | > 2 unique peptides | <i>rpl32e</i>    | 50S ribosomal protein L32e (HI5)                                                                        | 8  | 5  | 13  | 1.6     | 6   | 7  | 46.15 | 0 | 0 |
| rrnAC1426                             | > 2 unique peptides | <i>rps15p</i>    | 30S ribosomal protein S15P/S13e (HmaS15) (HS11)                                                         | 18 | 12 | 30  | 1.5     | 8   | 22 | 26.67 | 0 | 0 |
| rrnAC3179                             | > 2 unique peptides | <i>rps19e</i>    | 30S ribosomal protein S19e (HS12) (E1.3)                                                                | 22 | 15 | 37  | 1.47    | 5   | 32 | 13.51 | 0 | 0 |
| rrnAC0070                             | > 2 unique peptides | <i>rps2p</i>     | 30S ribosomal protein S2P (HS2) (ORFMSG)                                                                | 26 | 18 | 44  | 1.44    | 0   | 44 | 0     | 0 | 0 |
| rrnAC2065                             | > 2 unique peptides | <i>rpl15e</i>    | 50S ribosomal protein L15e (50S ribosomal protein LC12)                                                 | 16 | 11 | 27  | 1.45    | 27  | 0  | 100   | 0 | 0 |
| rrnAC1608                             | > 2 unique peptides | <i>rpl2p</i>     | 50S ribosomal protein L2P (Hmal2) (HI4)                                                                 | 24 | 17 | 41  | 1.41    | 38  | 3  | 92.68 | 0 | 0 |
| rrnAC3112                             | > 2 unique peptides | <i>rpl39e</i>    | 50S ribosomal protein L39e (HI39e) (HI46e)                                                              | 7  | 5  | 12  | 1.4     | 12  | 0  | 100   | 0 | 0 |
| rrnAC1511                             | > 2 unique peptides | <i>rps8e</i>     | 30S ribosomal protein S8e (HS23)                                                                        | 12 | 9  | 21  | 1.33    | 12  | 9  | 57.14 | 0 | 0 |
| rrnAC1591                             | > 2 unique peptides | <i>rpl30p</i>    | 50S ribosomal protein L30P (Hmal30) (HI20) (HI16)                                                       | 9  | 7  | 16  | 1.29    | 0   | 16 | 0     | 0 | 0 |
| rrnAC1603                             | > 2 unique peptides | <i>rps17p</i>    | 30S ribosomal protein S17P (HmaS17) (HS14)                                                              | 10 | 8  | 18  | 1.25    | 1   | 17 | 5.56  | 0 | 0 |
| rrnAC0260                             | > 2 unique peptides | <i>rpl21e</i>    | 50S ribosomal protein L21e (HI31)                                                                       | 5  | 4  | 9   | 1.25    | 6   | 3  | 66.67 | 0 | 0 |
| rrnAC0055                             | > 2 unique peptides | <i>rps17e</i>    | 30S ribosomal protein S17e (Ribosomal protein HS26)                                                     | 6  | 5  | 11  | 1.2     | 0   | 11 | 0     | 0 | 0 |
| rrnAC1606                             | > 2 unique peptides | <i>rpl22p</i>    | 50S ribosomal protein L22P (Hmal22) (HI23)                                                              | 12 | 10 | 22  | 1.2     | 15  | 7  | 68.18 | 0 | 0 |
| rrnAC0065                             | > 2 unique peptides | <i>rpl13p</i>    | 50S ribosomal protein L13P (Hmal13)                                                                     | 30 | 27 | 57  | 1.11    | 56  | 1  | 98.25 | 0 | 0 |
| rrnAC1597                             | > 2 unique peptides | <i>rps8p</i>     | 30S ribosomal protein S8P (HmaS8) (HS16)                                                                | 7  | 7  | 14  | 1       | 3   | 11 | 21.43 | 0 | 0 |
| rrnAC2424                             | > 2 unique peptides | <i>rps12p</i>    | 30S ribosomal protein S12P                                                                              | 15 | 15 | 30  | 1       | 18  | 12 | 60    | 0 | 0 |
| rrnAC0103                             | > 2 unique peptides | <i>rpl7ae</i>    | 50S ribosomal protein L7Ae (Hs6)                                                                        | 16 | 16 | 32  | 1       | 3   | 29 | 9.38  | 0 | 0 |
| rrnAC2423                             | > 2 unique peptides | <i>rps7p</i>     | 30S ribosomal protein S7P (HmaS7)                                                                       | 35 | 40 | 75  | 0.88    | 35  | 40 | 46.67 | 0 | 0 |
| rrnAC1602                             | > 2 unique peptides | <i>rpl14p</i>    | 50S ribosomal protein L14P (Hmal14) (HI27)                                                              | 21 | 29 | 50  | 0.72    | 48  | 2  | 96    | 0 | 0 |
| rrnAC3113                             | > 2 unique peptides | <i>rpl31e</i>    | 50S ribosomal protein L31e (L34) (HI30)                                                                 | 4  | 6  | 10  | 0.67    | 7   | 3  | 70    | 0 | 0 |



|                                                          |                     |                |                                                                                                       |     |     |     |         |    |     |       |   |
|----------------------------------------------------------|---------------------|----------------|-------------------------------------------------------------------------------------------------------|-----|-----|-----|---------|----|-----|-------|---|
| rrnAC1415                                                | > 2 unique peptides | <i>rpl1p</i>   | 50S ribosomal protein L1P (Hmal1) (HL8)                                                               | 1   | 2   | 3   | 0.5     | 2  | 1   | 66.67 | 0 |
| rrnAC1594                                                | > 2 unique peptides | <i>rpl19e</i>  | 50S ribosomal protein L19e (Hmal19) (HI24)                                                            | 2   | 5   | 7   | 0.4     | 5  | 2   | 71.43 | 0 |
| rrnAC1590                                                | > 2 unique peptides | <i>rpl15p</i>  | 50S ribosomal protein L15P (Hmal15) (HI9)                                                             | 10  | 28  | 38  | 0.36    | 33 | 5   | 86.84 | 0 |
| rrnAC2405                                                | > 2 unique peptides | <i>rps10p</i>  | 30S ribosomal protein S10P (HmaS10)                                                                   | 1   | 3   | 4   | 0.33    | 0  | 4   | 0     | 0 |
| rrnAC3513                                                | > 2 unique peptides | <i>rps27E</i>  | 30S ribosomal protein S27e                                                                            | 1   | 3   | 4   | 0.33    | 0  | 4   | 0     | 0 |
| rrnAC1609                                                | single hit          | <i>rpl23p</i>  | 50S ribosomal protein L23P (Hmal23) (HI25) (L21)                                                      | 1   | 0   | 1   | #DIV/0! | 0  | 1   | 0     | 0 |
| rrnAC0066                                                | single hit          | <i>rps9p</i>   | 30S ribosomal protein S9P (HmaS9) (HS3) (F1)                                                          | 6   | 3   | 9   | 2       | 2  | 7   | 22.22 | 0 |
| rrnAC1414                                                | single hit          | <i>rpl11p</i>  | 50S ribosomal protein L11P (Hmal11)                                                                   | 2   | 1   | 3   | 2       | 0  | 3   | 0     | 0 |
| rrnAC1593                                                | single hit          | <i>rpl18p</i>  | 50S ribosomal protein L18P (Hmal18) (HI12)                                                            | 3   | 3   | 6   | 1       | 6  | 0   | 100   | 0 |
| rrnAC2489                                                | single hit          | <i>rps27ae</i> | 30S ribosomal protein S27ae (HSH)                                                                     | 0   | 1   | 1   | 0       | 0  | 1   | 0     | 0 |
| rrnAC1601                                                | single hit          | <i>rpl24p</i>  | 50S ribosomal protein L24P (Hmal24) (HI16) (HI15)                                                     | 0   | 1   | 1   | 0       | 1  | 0   | 100   | 0 |
| pNG7228                                                  | ND                  |                |                                                                                                       |     |     |     |         |    |     |       |   |
| rrnAC0104                                                | ND                  |                |                                                                                                       |     |     |     |         |    |     |       |   |
| rrnAC1669                                                | ND                  |                |                                                                                                       |     |     |     |         |    |     |       |   |
| rrnAC2802                                                | ND                  |                |                                                                                                       |     |     |     |         |    |     |       |   |
| rrnAC3514                                                | ND                  |                |                                                                                                       |     |     |     |         |    |     |       |   |
| rrlB-4                                                   |                     |                |                                                                                                       |     |     |     |         |    |     |       |   |
| rrlB-1                                                   |                     |                |                                                                                                       |     |     |     |         |    |     |       |   |
| rrlB-2                                                   |                     |                |                                                                                                       |     |     |     |         |    |     |       |   |
| rrlB-3                                                   |                     |                |                                                                                                       |     |     |     |         |    |     |       |   |
| rrs-1                                                    |                     |                |                                                                                                       |     |     |     |         |    |     |       |   |
| rrs-2                                                    |                     |                |                                                                                                       |     |     |     |         |    |     |       |   |
| rrs-3                                                    |                     |                |                                                                                                       |     |     |     |         |    |     |       |   |
| rrlA-1                                                   |                     |                |                                                                                                       |     |     |     |         |    |     |       |   |
| rrlA-2                                                   |                     |                |                                                                                                       |     |     |     |         |    |     |       |   |
| rrlA-3                                                   |                     |                |                                                                                                       |     |     |     |         |    |     |       |   |
| <b>03011 Ribosome</b>                                    |                     |                |                                                                                                       |     |     |     |         |    |     |       |   |
| <b>03012 Translation factors</b>                         |                     |                |                                                                                                       |     |     |     |         |    |     |       |   |
| rrnAC0261                                                | > 2 unique peptides | <i>ef1b</i>    | Elongation factor 1-beta (EF-1-beta) (aEF-1beta)                                                      | 13  | 6   | 19  | 2.17    | 0  | 19  | 0     | 0 |
| rrnAC3164                                                | > 2 unique peptides | <i>prf1</i>    | Peptide chain release factor subunit 1 (Translation termination factor aRF1)                          | 11  | 6   | 17  | 1.83    | 0  | 17  | 0     | 0 |
| rrnAC1956                                                | > 2 unique peptides | <i>eif2BD2</i> | Translation initiation factor eIF-2B subunit delta                                                    | 10  | 7   | 17  | 1.43    | 0  | 17  | 0     | 0 |
| rrnAC2413                                                | > 2 unique peptides | <i>fusA</i>    | Elongation factor 2 (EF-2)                                                                            | 148 | 141 | 289 | 1.05    | 9  | 280 | 3.11  | 0 |
| rrnAC2474                                                | > 2 unique peptides | <i>eif1a</i>   | Translation initiation factor 1A (aIF-1A)                                                             | 19  | 19  | 38  | 1       | 3  | 35  | 7.89  | 0 |
| rrnAC2827                                                | > 2 unique peptides | <i>eif2g</i>   | Translation initiation factor 2 gamma subunit (eIF-2-gamma) (aIF2-gamma)                              | 11  | 11  | 22  | 1       | 0  | 22  | 0     | 0 |
| rrnAC1929                                                | > 2 unique peptides | <i>eif5a</i>   | Translation initiation factor 5A (eIF-5A) (Hypusine-containing protein)                               | 13  | 13  | 26  | 1       | 0  | 26  | 0     | 0 |
| rrnAC2445                                                | > 2 unique peptides | <i>sui1</i>    | Protein translation factor SUI1 homolog                                                               | 9   | 9   | 18  | 1       | 0  | 18  | 0     | 0 |
| rrnAC0289                                                | > 2 unique peptides | <i>eif2BD1</i> | Translation initiation factor eIF-2B subunit delta                                                    | 16  | 19  | 35  | 0.84    | 0  | 35  | 0     | 0 |
| rrnAC2406                                                | > 2 unique peptides | <i>tuf</i>     | Elongation factor 1-alpha (EF-1-alpha) (Elongation factor Tu) (EF-Tu)                                 | 141 | 222 | 363 | 0.64    | 40 | 323 | 11.02 | 0 |
| rrnAC3512                                                | > 2 unique peptides | <i>eif2a</i>   | Translation initiation factor 2 alpha subunit (eIF-2-alpha) (aIF2-alpha)                              | 8   | 13  | 21  | 0.62    | 0  | 21  | 0     | 0 |
| rrnAC0138                                                | > 2 unique peptides | <i>eif2B1</i>  | Probable translation initiation factor 2 beta subunit                                                 | 4   | 7   | 11  | 0.57    | 0  | 11  | 0     | 0 |
| rrnAC1619                                                | > 2 unique peptides | <i>gtp2</i>    | GTP-binding protein-like                                                                              | 2   | 5   | 7   | 0.4     | 0  | 7   | 0     | 0 |
| rrnAC3203                                                | > 2 unique peptides | <i>infB</i>    | Probable translation initiation factor IF-2                                                           | 3   | 10  | 13  | 0.3     | 0  | 13  | 0     | 0 |
| rrnAC1241                                                | ND                  |                |                                                                                                       |     |     |     |         |    |     |       |   |
| rrnAC1124                                                | ND                  |                |                                                                                                       |     |     |     |         |    |     |       |   |
| <b>00970 Aminoacyl-tRNA biosynthesis [PATH:hma00970]</b> |                     |                |                                                                                                       |     |     |     |         |    |     |       |   |
| rrnAC2967                                                | > 2 unique peptides | <i>pheT</i>    | Phenylalanyl-tRNA synthetase beta chain (EC 6.1.1.20) (Phenylalanine--tRNA ligase beta chain) (PheRS) | 20  | 15  | 35  | 1.33    | 1  | 34  | 2.86  | 0 |
| rrnAC3462                                                | > 2 unique peptides | <i>thrS</i>    | Threonyl-tRNA synthetase (EC 6.1.1.3) (Threonine--tRNA ligase)(ThrRS)                                 | 15  | 12  | 27  | 1.25    | 0  | 27  | 0     | 0 |
| rrnAC1800                                                | > 2 unique peptides | <i>metG</i>    | Methionyl-tRNA synthetase (EC 6.1.1.10) (Methionine--tRNA ligase)(MetRS)                              | 24  | 20  | 44  | 1.2     | 0  | 44  | 0     | 0 |
| rrnAC3173                                                | > 2 unique peptides | <i>lysS</i>    | Lysyl-tRNA synthetase (EC 6.1.1.6) (Lysine--tRNA ligase) (LysRS)                                      | 6   | 5   | 11  | 1.2     | 0  | 11  | 0     | 0 |
| rrnAC2966                                                | > 2 unique peptides | <i>pheS</i>    | Phenylalanyl-tRNA synthetase alpha chain (EC 6.1.1.20)                                                | 7   | 6   | 13  | 1.17    | 0  | 13  | 0     | 0 |
| rrnAC2650                                                | > 2 unique peptides | <i>leuS1</i>   | Leucyl-tRNA synthetase (EC 6.1.1.4)                                                                   | 16  | 14  | 30  | 1.14    | 0  | 30  | 0     | 0 |
| rrnAC2808                                                | > 2 unique peptides | <i>serS</i>    | Seryl-tRNA synthetase (EC 6.1.1.11) (Seryl-tRNA(Ser/Sec) synthetase)(Serine--tRNA ligase) (SerRS)     | 19  | 17  | 36  | 1.12    | 0  | 36  | 0     | 0 |
| rrnAC0166                                                | > 2 unique peptides | <i>proS</i>    | Prolyl-tRNA synthetase (EC 6.1.1.15) (Proline--tRNA ligase) (ProRS)                                   | 19  | 18  | 37  | 1.06    | 0  | 37  | 0     | 0 |
| rrnAC3169                                                | > 2 unique peptides | <i>argS</i>    | Arginyl-tRNA synthetase (EC 6.1.1.19) (Arginine--tRNA ligase) (ArgRS)                                 | 25  | 24  | 49  | 1.04    | 0  | 49  | 0     | 0 |
| rrnAC0023                                                | > 2 unique peptides | <i>gatE</i>    | Glutamyl-tRNA(Gln) amidotransferase subunit E (EC 6.3.5.-)                                            | 12  | 12  | 24  | 1       | 0  | 24  | 0     | 0 |
| rrnAC2965                                                | > 2 unique peptides | <i>trpS</i>    | Tryptophanyl-tRNA synthetase (EC 6.1.1.2)                                                             | 11  | 11  | 22  | 1       | 0  | 22  | 0     | 0 |
| rrnAC0085                                                | > 2 unique peptides | <i>glx</i>     | Glutamyl-tRNA synthetase (EC 6.1.1.17) (Glutamate--tRNA ligase)(GluRS)                                | 10  | 11  | 21  | 0.91    | 0  | 21  | 0     | 0 |
| rrnAC1356                                                | > 2 unique peptides | <i>gatC</i>    | Glutamyl-tRNA(Gln) amidotransferase subunit C (EC 6.3.5.-)                                            | 9   | 11  | 20  | 0.82    | 0  | 20  | 0     | 0 |
| rrnAC2561                                                | > 2 unique peptides | <i>alaS</i>    | Alanyl-tRNA synthetase (EC 6.1.1.7) (Alanine--tRNA ligase) (AlaRS)                                    | 12  | 15  | 27  | 0.8     | 0  | 27  | 0     | 0 |
| rrnAC1642                                                | > 2 unique peptides | <i>gatB</i>    | Aspartyl/glutamyl-tRNA(Asn/Gln) amidotransferase subunit B (EC 6.3.5.-) (Asp/Glu-ADT subunit B)       | 15  | 19  | 34  | 0.79    | 0  | 34  | 0     | 0 |
| rrnAC1657                                                | > 2 unique peptides | <i>aspS</i>    | Aspartyl-tRNA synthetase (EC 6.1.1.12) (Aspartate--tRNA ligase)(AspRS)                                | 40  | 52  | 92  | 0.77    | 2  | 90  | 2.17  | 0 |
| rrnAC2947                                                | > 2 unique peptides | <i>leuS2</i>   | Leucyl-tRNA synthetase (EC 6.1.1.4)                                                                   | 35  | 46  | 81  | 0.76    | 0  | 81  | 0     | 0 |
| rrnAC1355                                                | > 2 unique peptides | <i>gatA</i>    | Glutamyl-tRNA(Gln) amidotransferase subunit A (EC 6.3.5.-) (Glu-ADT subunit A)                        | 3   | 4   | 7   | 0.75    | 0  | 7   | 0     | 0 |
| rrnAC3183                                                | > 2 unique peptides | <i>hisS</i>    | Histidyl-tRNA synthetase (EC 6.1.1.21) (Histidine--tRNA ligase)(HisRS)                                | 9   | 13  | 22  | 0.69    | 0  | 22  | 0     | 0 |
| rrnAC0543                                                | > 2 unique peptides | <i>tyrS</i>    | Tyrosyl-tRNA synthetase (EC 6.1.1.1) (Tyrosine--tRNA ligase) (TyrRS)                                  | 8   | 14  | 22  | 0.57    | 0  | 22  | 0     | 0 |
| rrnAC2634                                                | > 2 unique peptides | <i>ileS</i>    | Isoleucyl-tRNA synthetase (EC 6.1.1.5) (Isoleucine--tRNA ligase)(IleRS)                               | 25  | 45  | 70  | 0.56    | 0  | 70  | 0     | 0 |
| rrnAC1729                                                | > 2 unique peptides | <i>valS</i>    | Valyl-tRNA synthetase (EC 6.1.1.9) (Valine--tRNA ligase) (ValRS)                                      | 8   | 18  | 26  | 0.44    | 0  | 26  | 0     | 0 |
| rrnAC0517                                                | > 2 unique peptides | <i>alaS2</i>   | Alanyl-tRNA synthetase (EC 6.1.1.7)                                                                   | 6   | 14  | 20  | 0.43    | 0  | 20  | 0     | 0 |
| rrnAC2701                                                | > 2 unique peptides | <i>glyS</i>    | Glycyl-tRNA synthetase (EC 6.1.1.14)                                                                  | 6   | 14  | 20  | 0.43    | 0  | 20  | 0     | 0 |
| rrnAC3442                                                | > 2 unique peptides | <i>asbA</i>    | L-asparaginase (EC 3.5.1.1)                                                                           | 0   | 7   | 7   | 0       | 0  | 7   | 0     | 0 |

|                                               |                     |                  |                                                                                                      |    |    |     |         |    |    |       |   |
|-----------------------------------------------|---------------------|------------------|------------------------------------------------------------------------------------------------------|----|----|-----|---------|----|----|-------|---|
| rrnAC1292                                     | > 2 unique peptides | <i>cysS</i>      | CysteinyI-tRNA synthetase (EC 6.1.1.16) (Cysteine--tRNA ligase)(CysRS)                               | 0  | 5  | 5   | 0       | 0  | 5  | 0     | 0 |
| <b>01123 Folding, Sorting and Degradation</b> |                     |                  |                                                                                                      |    |    |     |         |    |    |       |   |
| <b>03110 Chaperones and folding catalysts</b> |                     |                  |                                                                                                      |    |    |     |         |    |    |       |   |
| rrnAC1308                                     | > 2 unique peptides | <i>rrnAC1308</i> | Glutaredoxin                                                                                         | 20 | 19 | 39  | 1.05    | 0  | 39 | 0     | 0 |
| rrnAC3116                                     | > 2 unique peptides | <i>pfdA</i>      | Prefoldin alpha subunit (GimC alpha subunit)                                                         | 33 | 33 | 66  | 1       | 0  | 66 | 0     | 0 |
| rrnAC3303                                     | > 2 unique peptides | <i>ppiB1</i>     | Peptidyl-prolyl cis-trans isomerase slr1251 (EC 5.2.1.8)                                             | 25 | 25 | 50  | 1       | 7  | 43 | 14    | 0 |
| rrnAC1680                                     | > 2 unique peptides | <i>pfdB</i>      | Prefoldin beta subunit (GimC beta subunit)                                                           | 30 | 31 | 61  | 0.97    | 1  | 60 | 1.64  | 0 |
| rrnAC2110                                     | > 2 unique peptides | <i>trxA3</i>     | Thioredoxin                                                                                          | 26 | 27 | 53  | 0.96    | 0  | 53 | 0     | 0 |
| rrnAC3339                                     | > 2 unique peptides | <i>dnaK</i>      | Chaperone protein dnaK (Heat shock protein 70) (Heat shock 70 kDaprotein) (HSP70)                    | 57 | 71 | 128 | 0.8     | 29 | 99 | 22.66 | 0 |
| rrnAC1230                                     | > 2 unique peptides | <i>slyD</i>      | Peptidyl-prolyl cis-trans isomerase (EC 5.2.1.8)                                                     | 43 | 57 | 100 | 0.75    | 2  | 98 | 2     | 0 |
| rrnAC3340                                     | > 2 unique peptides | <i>grpE</i>      | Heat shock protein GrpE protein                                                                      | 3  | 7  | 10  | 0.43    | 0  | 10 | 0     | 0 |
| rrnAC3334                                     | ND                  |                  |                                                                                                      |    |    |     |         |    |    |       |   |
| rrnAC0638                                     | ND                  |                  |                                                                                                      |    |    |     |         |    |    |       |   |
| pNG7134                                       | ND                  |                  |                                                                                                      |    |    |     |         |    |    |       |   |
| rrnB0277                                      | ND                  |                  |                                                                                                      |    |    |     |         |    |    |       |   |
| <b>04121 Ubiquitin system</b>                 |                     |                  |                                                                                                      |    |    |     |         |    |    |       |   |
| rrnAC1773                                     | > 2 unique peptides | <i>psmA2</i>     | Proteasome alpha subunit (EC 3.4.25.1) (Multicatalytic endopeptidasecomplex alpha subunit)           | 47 | 20 | 67  | 2.35    | 0  | 67 | 0     | 0 |
| rrnAC0442                                     | > 2 unique peptides | <i>psmA3</i>     | Proteasome subunit alpha                                                                             | 6  | 4  | 10  | 1.5     | 0  | 10 | 0     | 0 |
| rrnAC3190                                     | > 2 unique peptides | <i>pan1</i>      | Proteasome-activating nucleotidase 1                                                                 | 12 | 8  | 20  | 1.5     | 1  | 19 | 5     | 0 |
| rrnAC1174                                     | > 2 unique peptides | <i>psmA1</i>     | Proteasome alpha subunit (EC 3.4.25.1) (Multicatalytic endopeptidasecomplex alpha subunit)           | 50 | 38 | 88  | 1.32    | 1  | 87 | 1.14  | 0 |
| rrnAC3546                                     | > 2 unique peptides | <i>pan2</i>      | Proteasome-activating nucleotidase 2                                                                 | 21 | 26 | 47  | 0.81    | 1  | 46 | 2.13  | 0 |
| rrnAC1772                                     | > 2 unique peptides | <i>psmA1</i>     | Proteasome subunit alpha                                                                             | 5  | 9  | 14  | 0.56    | 0  | 14 | 0     | 0 |
| <b>03018 RNA degradation [PATH:hma03018]</b>  |                     |                  |                                                                                                      |    |    |     |         |    |    |       |   |
| rrnAC0069                                     | > 2 unique peptides | <i>eno</i>       | Enolase (EC 4.2.1.11) (2-phosphoglycerate dehydratase) (2-phospho-D-glycerate hydro-lyase)           | 24 | 23 | 47  | 1.04    | 0  | 47 | 0     | 0 |
| rrnAC2072                                     | > 2 unique peptides | <i>vacB</i>      | Ribonuclease R (EC 3.1.-.-)                                                                          | 10 | 12 | 22  | 0.83    | 0  | 22 | 0     | 0 |
| rrnAC3339                                     | > 2 unique peptides | <i>dnaK</i>      | Chaperone protein dnaK (Heat shock protein 70) (Heat shock 70 kDaprotein) (HSP70)                    | 57 | 71 | 128 | 0.8     | 29 | 99 | 22.66 | 0 |
| pNG7302                                       | > 2 unique peptides | <i>ppk</i>       | Polyphosphate kinase (EC 2.7.4.1)                                                                    | 0  | 8  | 8   | 0       | 0  | 8  | 0     | 0 |
| <b>01124 Replication and Repair</b>           |                     |                  |                                                                                                      |    |    |     |         |    |    |       |   |
| <b>03030 DNA replication [PATH:hma03030]</b>  |                     |                  |                                                                                                      |    |    |     |         |    |    |       |   |
| rrnAC2744                                     | > 2 unique peptides | <i>rrnAC2744</i> | Hypothetical protein                                                                                 | 5  | 3  | 8   | 1.67    | 0  | 8  | 0     | 0 |
| pNG2007                                       | > 2 unique peptides | <i>pNG2007</i>   | Hypothetical protein                                                                                 | 18 | 11 | 29  | 1.64    | 0  | 29 | 0     | 0 |
| rrnAC2851                                     | > 2 unique peptides | <i>pcn</i>       | DNA polymerase sliding clamp (Proliferating cell nuclear antigenhomolog) (PCNA)                      | 24 | 33 | 57  | 0.73    | 5  | 52 | 8.77  | 0 |
| rrnAC1133                                     | > 2 unique peptides | <i>rpaA</i>      | Replication protein A                                                                                | 12 | 17 | 29  | 0.71    | 0  | 29 | 0     | 0 |
| rrnAC0463                                     | single hit          | <i>ligA</i>      | DNA ligase (EC 6.5.1.1)                                                                              | 0  | 1  | 1   | 0       | 0  | 1  | 0     | 0 |
| pNG7077                                       | ND                  |                  |                                                                                                      |    |    |     |         |    |    |       |   |
| rrnAC3320                                     | ND                  |                  |                                                                                                      |    |    |     |         |    |    |       |   |
| rrnAC3216                                     | ND                  |                  |                                                                                                      |    |    |     |         |    |    |       |   |
| rrnAC3049                                     | ND                  |                  |                                                                                                      |    |    |     |         |    |    |       |   |
| rrnAC2302                                     | ND                  |                  |                                                                                                      |    |    |     |         |    |    |       |   |
| rrnAC0032                                     | ND                  |                  |                                                                                                      |    |    |     |         |    |    |       |   |
| <b>03032 DNA replication proteins</b>         |                     |                  |                                                                                                      |    |    |     |         |    |    |       |   |
| rrnAC0455                                     | > 2 unique peptides | <i>gyrA</i>      | DNA gyrase subunit A (EC 5.99.1.3)                                                                   | 13 | 4  | 17  | 3.25    | 0  | 17 | 0     | 0 |
| rrnAC2691                                     | > 2 unique peptides | <i>polC</i>      | DNA polymerase II large subunit (EC 2.7.7.7) (Pol II) [Contains: HmapolC intein (Hma pol II intein)] | 3  | 1  | 4   | 3       | 0  | 4  | 0     | 0 |
| rrnAC1645                                     | > 2 unique peptides | <i>topA</i>      | DNA topoisomerase I (EC 5.99.1.2)                                                                    | 4  | 2  | 6   | 2       | 0  | 6  | 0     | 0 |
| rrnAC2565                                     | > 2 unique peptides | <i>rfcS</i>      | Replication factor C small subunit (RFC small subunit) (Clamp loaderssmall subunit)                  | 12 | 7  | 19  | 1.71    | 0  | 19 | 0     | 0 |
| rrnAC0457                                     | > 2 unique peptides | <i>top6B</i>     | Type II DNA topoisomerase VI subunit B (EC 5.99.1.3)                                                 | 37 | 24 | 61  | 1.54    | 17 | 44 | 27.87 | 0 |
| rrnAC0456                                     | > 2 unique peptides | <i>gyrB</i>      | DNA gyrase subunit B (EC 5.99.1.3)                                                                   | 7  | 5  | 12  | 1.4     | 0  | 12 | 0     | 0 |
| rrnAC2487                                     | > 2 unique peptides | <i>rfcC2</i>     | Replication factor C small subunit                                                                   | 5  | 4  | 9   | 1.25    | 0  | 9  | 0     | 0 |
| rrnAC1831                                     | > 2 unique peptides | <i>polB1</i>     | DNA polymerase B elongation subunit (EC 2.7.7.7)                                                     | 1  | 2  | 3   | 0.5     | 0  | 3  | 0     | 0 |
| rrnAC0459                                     | > 2 unique peptides | <i>top6A</i>     | Type II DNA topoisomerase VI subunit A (EC 5.99.1.3)                                                 | 2  | 5  | 7   | 0.4     | 0  | 7  | 0     | 0 |
| rrnAC2862                                     | single hit          | <i>cdc6-5</i>    | Cell division control protein 6 homolog 5 (CDC6 homolog 5)                                           | 1  | 0  | 1   | #DIV/0! | 0  | 1  | 0     | 0 |
| rrnAC2762                                     | single hit          | <i>mcm2</i>      | Cell division control protein 21                                                                     | 1  | 1  | 2   | 1       | 0  | 2  | 0     | 0 |
| rrnAC0292                                     | single hit          | <i>priA</i>      | Probable DNA primase small subunit (EC 2.7.7.-)                                                      | 0  | 1  | 1   | 0       | 0  | 1  | 0     | 0 |
| rrnAC2711                                     | ND                  |                  |                                                                                                      |    |    |     |         |    |    |       |   |
| rrnAC2318                                     | ND                  |                  |                                                                                                      |    |    |     |         |    |    |       |   |
| pNG6176                                       | ND                  |                  |                                                                                                      |    |    |     |         |    |    |       |   |
| rrnAC2714                                     | ND                  |                  |                                                                                                      |    |    |     |         |    |    |       |   |
| rrnAC1744                                     | ND                  |                  |                                                                                                      |    |    |     |         |    |    |       |   |
| rrnAC2963                                     | ND                  |                  |                                                                                                      |    |    |     |         |    |    |       |   |
| <b>03036 Chromosome</b>                       |                     |                  |                                                                                                      |    |    |     |         |    |    |       |   |
| rrnB0062                                      | > 2 unique peptides | <i>parA3</i>     | Chromosome partitioning protein ParA family ATPase                                                   | 2  | 0  | 2   | #DIV/0! | 0  | 2  | 0     | 0 |
| rrnAC0974                                     | > 2 unique peptides | <i>rrnAC0974</i> | Hypothetical protein                                                                                 | 3  | 0  | 3   | #DIV/0! | 0  | 3  | 0     | 0 |
| rrnAC2004                                     | > 2 unique peptides | <i>ftsZ3</i>     | Cell division protein FtsZ                                                                           | 9  | 5  | 14  | 1.8     | 4  | 10 | 28.57 | 0 |
| rrnAC0665                                     | > 2 unique peptides | <i>abcP-2</i>    | ABC transporter permease protein                                                                     | 5  | 5  | 10  | 1       | 10 | 0  | 100   | 4 |
| rrnAC0703                                     | > 2 unique peptides | <i>ftsZ1</i>     | Cell division protein FtsZ                                                                           | 19 | 23 | 42  | 0.83    | 9  | 33 | 21.43 | 0 |
| pNG6012                                       | > 2 unique peptides | <i>parA2</i>     | Partition protein                                                                                    | 7  | 9  | 16  | 0.78    | 0  | 16 | 0     | 0 |
| rrnAC0056                                     | > 2 unique peptides | <i>mrp1</i>      | Mrp protein-like                                                                                     | 5  | 7  | 12  | 0.71    | 0  | 12 | 0     | 0 |
| rrnAC1639                                     | single hit          | <i>smc2</i>      | Chromosome segregation protein                                                                       | 1  | 0  | 1   | #DIV/0! | 0  | 1  | 0     | 0 |

|                                                         |                     |                  |                                                                                   |    |    |    |         |   |    |      |   |
|---------------------------------------------------------|---------------------|------------------|-----------------------------------------------------------------------------------|----|----|----|---------|---|----|------|---|
| pNG2014                                                 | single hit          | <i>sojC</i>      | Chromosome partitioning protein                                                   | 0  | 2  | 2  | 0       | 0 | 2  | 0    | 0 |
| rrnAC1638                                               | ND                  |                  |                                                                                   |    |    |    |         |   |    |      |   |
| rrnAC1227                                               | ND                  |                  |                                                                                   |    |    |    |         |   |    |      |   |
| rrnAC1880                                               | ND                  |                  |                                                                                   |    |    |    |         |   |    |      |   |
| rrnAC1939                                               | ND                  |                  |                                                                                   |    |    |    |         |   |    |      |   |
| rrnAC2768                                               | ND                  |                  |                                                                                   |    |    |    |         |   |    |      |   |
| rrnAC3166                                               | ND                  |                  |                                                                                   |    |    |    |         |   |    |      |   |
| pNG4012                                                 | ND                  |                  |                                                                                   |    |    |    |         |   |    |      |   |
| rrnAC1208                                               | ND                  |                  |                                                                                   |    |    |    |         |   |    |      |   |
| <b>03410 Base excision repair [PATH:hma03410]</b>       |                     |                  |                                                                                   |    |    |    |         |   |    |      |   |
| rrnAC2015                                               | > 2 unique peptides | <i>nfo</i>       | Probable endonuclease 4 (EC 3.1.21.2) (Endonuclease IV)(Endodeoxyribonuclease IV) | 3  | 2  | 5  | 1.5     | 0 | 5  | 0    | 0 |
| pNG7116                                                 | > 2 unique peptides | <i>nthC</i>      | Endonuclease III (EC 4.2.99.18)                                                   | 4  | 4  | 8  | 1       | 0 | 8  | 0    | 0 |
| rrnAC2851                                               | > 2 unique peptides | <i>pcn</i>       | DNA polymerase sliding clamp (Proliferating cell nuclear antigenhomolog) (PCNA)   | 24 | 33 | 57 | 0.73    | 5 | 52 | 8.77 | 0 |
| rrnAC0265                                               | > 2 unique peptides | <i>apl</i>       | AP-endonuclease/AP-lyase (EC 3.1.21.2) (EC 4.2.99.18)                             | 4  | 7  | 11 | 0.57    | 0 | 11 | 0    | 0 |
| rrnAC0739                                               | single hit          | <i>nthA</i>      | Endonuclease III (EC 4.2.99.18)                                                   | 1  | 1  | 2  | 1       | 0 | 2  | 0    | 0 |
| rrnAC1088                                               | single hit          | <i>alkA</i>      | DNA-3-methyladenine glycosylase                                                   | 0  | 2  | 2  | 0       | 0 | 2  | 0    | 0 |
| rrnAC0463                                               | single hit          | <i>ligA</i>      | DNA ligase (EC 6.5.1.1)                                                           | 0  | 1  | 1  | 0       | 0 | 1  | 0    | 0 |
| rrnAC1166                                               | ND                  |                  |                                                                                   |    |    |    |         |   |    |      |   |
| rrnAC1908                                               | ND                  |                  |                                                                                   |    |    |    |         |   |    |      |   |
| rrnAC2648                                               | ND                  |                  |                                                                                   |    |    |    |         |   |    |      |   |
| rrnAC0987                                               | ND                  |                  |                                                                                   |    |    |    |         |   |    |      |   |
| rrnAC3049                                               | ND                  |                  |                                                                                   |    |    |    |         |   |    |      |   |
| rrnAC0032                                               | ND                  |                  |                                                                                   |    |    |    |         |   |    |      |   |
| <b>03420 Nucleotide excision repair [PATH:hma03420]</b> |                     |                  |                                                                                   |    |    |    |         |   |    |      |   |
| rrnAC2996                                               | > 2 unique peptides | <i>uvrB</i>      | UvrABC system protein B (Protein uvrB) (Excinuclease ABC subunit B)               | 2  | 0  | 2  | #DIV/0! | 0 | 2  | 0    | 0 |
| rrnAC2267                                               | > 2 unique peptides | <i>uvrD</i>      | Repair helicase                                                                   | 27 | 9  | 36 | 3       | 2 | 34 | 5.56 | 0 |
| rrnAC2116                                               | > 2 unique peptides | <i>uvrA</i>      | Excinuclease ABC subunit A                                                        | 14 | 8  | 22 | 1.75    | 0 | 22 | 0    | 0 |
| rrnAC2744                                               | > 2 unique peptides | <i>rrnAC2744</i> | Hypothetical protein                                                              | 5  | 3  | 8  | 1.67    | 0 | 8  | 0    | 0 |
| pNG2007                                                 | > 2 unique peptides | <i>pNG2007</i>   | Hypothetical protein                                                              | 18 | 11 | 29 | 1.64    | 0 | 29 | 0    | 0 |
| rrnAC2851                                               | > 2 unique peptides | <i>pcn</i>       | DNA polymerase sliding clamp (Proliferating cell nuclear antigenhomolog) (PCNA)   | 24 | 33 | 57 | 0.73    | 5 | 52 | 8.77 | 0 |
| rrnAC1133                                               | > 2 unique peptides | <i>rpaA</i>      | Replication protein A                                                             | 12 | 17 | 29 | 0.71    | 0 | 29 | 0    | 0 |
| rrnAC0463                                               | single hit          | <i>ligA</i>      | DNA ligase (EC 6.5.1.1)                                                           | 0  | 1  | 1  | 0       | 0 | 1  | 0    | 0 |
| rrnAC3041                                               | ND                  |                  |                                                                                   |    |    |    |         |   |    |      |   |
| rrnAC3049                                               | ND                  |                  |                                                                                   |    |    |    |         |   |    |      |   |
| rrnAC2302                                               | ND                  |                  |                                                                                   |    |    |    |         |   |    |      |   |
| <b>03430 Mismatch repair [PATH:hma03430]</b>            |                     |                  |                                                                                   |    |    |    |         |   |    |      |   |
| rrnB0041                                                | > 2 unique peptides | <i>xseA2</i>     | Probable exodeoxyribonuclease VII large subunit (EC 3.1.11.6)                     | 3  | 0  | 3  | #DIV/0! | 3 | 0  | 100  | 1 |
| rrnAC2267                                               | > 2 unique peptides | <i>uvrD</i>      | Repair helicase                                                                   | 27 | 9  | 36 | 3       | 2 | 34 | 5.56 | 0 |
| rrnAC2532                                               | > 2 unique peptides | <i>mutS1</i>     | DNA mismatch repair protein mutS 1                                                | 2  | 1  | 3  | 2       | 0 | 3  | 0    | 0 |
| rrnAC2744                                               | > 2 unique peptides | <i>rrnAC2744</i> | Hypothetical protein                                                              | 5  | 3  | 8  | 1.67    | 0 | 8  | 0    | 0 |
| pNG2007                                                 | > 2 unique peptides | <i>pNG2007</i>   | Hypothetical protein                                                              | 18 | 11 | 29 | 1.64    | 0 | 29 | 0    | 0 |
| rrnAC2851                                               | > 2 unique peptides | <i>pcn</i>       | DNA polymerase sliding clamp (Proliferating cell nuclear antigenhomolog) (PCNA)   | 24 | 33 | 57 | 0.73    | 5 | 52 | 8.77 | 0 |
| rrnAC1133                                               | > 2 unique peptides | <i>rpaA</i>      | Replication protein A                                                             | 12 | 17 | 29 | 0.71    | 0 | 29 | 0    | 0 |
| rrnAC2550                                               | > 2 unique peptides | <i>mutL</i>      | DNA mismatch repair protein mutL                                                  | 2  | 3  | 5  | 0.67    | 0 | 5  | 0    | 0 |
| pNG6094                                                 | > 2 unique peptides | <i>xseA1</i>     | Probable exodeoxyribonuclease VII large subunit (EC 3.1.11.6)                     | 0  | 2  | 2  | 0       | 2 | 0  | 100  | 1 |
| rrnAC0463                                               | single hit          | <i>ligA</i>      | DNA ligase (EC 6.5.1.1)                                                           | 0  | 1  | 1  | 0       | 0 | 1  | 0    | 0 |
| rrnAC2937                                               | ND                  |                  |                                                                                   |    |    |    |         |   |    |      |   |
| pNG6095                                                 | ND                  |                  |                                                                                   |    |    |    |         |   |    |      |   |
| rrnB0042                                                | ND                  |                  |                                                                                   |    |    |    |         |   |    |      |   |
| rrnAC3049                                               | ND                  |                  |                                                                                   |    |    |    |         |   |    |      |   |
| rrnAC2302                                               | ND                  |                  |                                                                                   |    |    |    |         |   |    |      |   |
| <b>03440 Homologous recombination</b>                   |                     |                  |                                                                                   |    |    |    |         |   |    |      |   |
| rrnAC2744                                               | > 2 unique peptides | <i>rrnAC2744</i> | Hypothetical protein                                                              | 5  | 3  | 8  | 1.67    | 0 | 8  | 0    | 0 |
| pNG2007                                                 | > 2 unique peptides | <i>pNG2007</i>   | Hypothetical protein                                                              | 18 | 11 | 29 | 1.64    | 0 | 29 | 0    | 0 |
| rrnAC1133                                               | > 2 unique peptides | <i>rpaA</i>      | Replication protein A                                                             | 12 | 17 | 29 | 0.71    | 0 | 29 | 0    | 0 |
| rrnAC2302                                               | ND                  |                  |                                                                                   |    |    |    |         |   |    |      |   |
| <b>03450 Non-homologous end-joining</b>                 |                     |                  |                                                                                   |    |    |    |         |   |    |      |   |
| rrnAC0032                                               | ND                  |                  |                                                                                   |    |    |    |         |   |    |      |   |
| <b>03400 DNA repair and recombination proteins</b>      |                     |                  |                                                                                   |    |    |    |         |   |    |      |   |
| rrnAC2996                                               | > 2 unique peptides | <i>uvrB</i>      | UvrABC system protein B (Protein uvrB) (Excinuclease ABC subunit B)               | 2  | 0  | 2  | #DIV/0! | 0 | 2  | 0    | 0 |
| rrnB0041                                                | > 2 unique peptides | <i>xseA2</i>     | Probable exodeoxyribonuclease VII large subunit (EC 3.1.11.6)                     | 3  | 0  | 3  | #DIV/0! | 3 | 0  | 100  | 1 |
| rrnAC0455                                               | > 2 unique peptides | <i>gyrA</i>      | DNA gyrase subunit A (EC 5.99.1.3)                                                | 13 | 4  | 17 | 3.25    | 0 | 17 | 0    | 0 |
| rrnAC2267                                               | > 2 unique peptides | <i>uvrD</i>      | Repair helicase                                                                   | 27 | 9  | 36 | 3       | 2 | 34 | 5.56 | 0 |
| rrnAC0832                                               | > 2 unique peptides | <i>phrB1</i>     | Deoxyribodipyrimidine photolyase (EC 4.1.99.3)                                    | 2  | 1  | 3  | 2       | 0 | 3  | 0    | 0 |
| rrnAC2159                                               | > 2 unique peptides | <i>dcd3</i>      | Probable deoxyuridine 5'-triphosphate nucleotidohydrolase(EC 3.6.1.23)            | 2  | 1  | 3  | 2       | 0 | 3  | 0    | 0 |
| rrnAC2532                                               | > 2 unique peptides | <i>mutS1</i>     | DNA mismatch repair protein mutS 1                                                | 2  | 1  | 3  | 2       | 0 | 3  | 0    | 0 |
| rrnAC1840                                               | > 2 unique peptides | <i>smc1</i>      | Structural maintenance of chromosomes                                             | 2  | 1  | 3  | 2       | 0 | 3  | 0    | 0 |
| rrnAC2847                                               | > 2 unique peptides | <i>hjr</i>       | Holliday junction resolvase                                                       | 4  | 2  | 6  | 2       | 0 | 6  | 0    | 0 |
| rrnAC1645                                               | > 2 unique peptides | <i>topA</i>      | DNA topoisomerase I (EC 5.99.1.2)                                                 | 4  | 2  | 6  | 2       | 0 | 6  | 0    | 0 |
| rrnAC2116                                               | > 2 unique peptides | <i>uvrA</i>      | Excinuclease ABC subunit A                                                        | 14 | 8  | 22 | 1.75    | 0 | 22 | 0    | 0 |
| rrnAC2744                                               | > 2 unique peptides | <i>rrnAC2744</i> | Hypothetical protein                                                              | 5  | 3  | 8  | 1.67    | 0 | 8  | 0    | 0 |







|                                               |                     |                 |                                                                                             |     |     |            |      |     |   |       |    |  |
|-----------------------------------------------|---------------------|-----------------|---------------------------------------------------------------------------------------------|-----|-----|------------|------|-----|---|-------|----|--|
| pNG7342                                       | ND                  |                 |                                                                                             |     |     |            |      |     |   |       |    |  |
| rrnAC2352                                     | ND                  |                 |                                                                                             |     |     |            |      |     |   |       |    |  |
| rrnAC3194                                     | ND                  |                 |                                                                                             |     |     |            |      |     |   |       |    |  |
| rrnB0106                                      | ND                  |                 |                                                                                             |     |     |            |      |     |   |       |    |  |
| rrnAC2653                                     | ND                  |                 |                                                                                             |     |     |            |      |     |   |       |    |  |
| rrnAC2655                                     | ND                  |                 |                                                                                             |     |     |            |      |     |   |       |    |  |
| rrnAC1508                                     | ND                  |                 |                                                                                             |     |     |            |      |     |   |       |    |  |
| pNG7234                                       | ND                  |                 |                                                                                             |     |     |            |      |     |   |       |    |  |
| pNG7231                                       | ND                  |                 |                                                                                             |     |     |            |      |     |   |       |    |  |
| pNG7233                                       | ND                  |                 |                                                                                             |     |     |            |      |     |   |       |    |  |
| pNG7122                                       | ND                  |                 |                                                                                             |     |     |            |      |     |   |       |    |  |
| rrnAC0702                                     | ND                  |                 |                                                                                             |     |     |            |      |     |   |       |    |  |
| pNG7121                                       | ND                  |                 |                                                                                             |     |     |            |      |     |   |       |    |  |
| rrnAC0569                                     | ND                  |                 |                                                                                             |     |     |            |      |     |   |       |    |  |
| rrnAC0646                                     | ND                  |                 |                                                                                             |     |     |            |      |     |   |       |    |  |
| rrnAC0824                                     | ND                  |                 |                                                                                             |     |     |            |      |     |   |       |    |  |
| rrnAC1989                                     | ND                  |                 |                                                                                             |     |     |            |      |     |   |       |    |  |
| rrnB0205                                      | ND                  |                 |                                                                                             |     |     |            |      |     |   |       |    |  |
| pNG7120                                       | ND                  |                 |                                                                                             |     |     |            |      |     |   |       |    |  |
| pNG7119                                       | ND                  |                 |                                                                                             |     |     |            |      |     |   |       |    |  |
| rrnAC0567                                     | ND                  |                 |                                                                                             |     |     |            |      |     |   |       |    |  |
| rrnAC0642                                     | ND                  |                 |                                                                                             |     |     |            |      |     |   |       |    |  |
| rrnB0203                                      | ND                  |                 |                                                                                             |     |     |            |      |     |   |       |    |  |
| pNG7118                                       | ND                  |                 |                                                                                             |     |     |            |      |     |   |       |    |  |
| rrnAC0641                                     | ND                  |                 |                                                                                             |     |     |            |      |     |   |       |    |  |
| rrnAC1993                                     | ND                  |                 |                                                                                             |     |     |            |      |     |   |       |    |  |
| rrnB0202                                      | ND                  |                 |                                                                                             |     |     |            |      |     |   |       |    |  |
| rrnB0224                                      | ND                  |                 |                                                                                             |     |     |            |      |     |   |       |    |  |
| rrnAC2040                                     | ND                  |                 |                                                                                             |     |     |            |      |     |   |       |    |  |
| rrnAC2041                                     | ND                  |                 |                                                                                             |     |     |            |      |     |   |       |    |  |
| rrnAC2042                                     | ND                  |                 |                                                                                             |     |     |            |      |     |   |       |    |  |
| rrnAC2043                                     | ND                  |                 |                                                                                             |     |     |            |      |     |   |       |    |  |
| pNG7041                                       | ND                  |                 |                                                                                             |     |     |            |      |     |   |       |    |  |
| rrnAC3375                                     | ND                  |                 |                                                                                             |     |     |            |      |     |   |       |    |  |
| pNG7276                                       | ND                  |                 |                                                                                             |     |     |            |      |     |   |       |    |  |
| rrnAC3372                                     | ND                  |                 |                                                                                             |     |     |            |      |     |   |       |    |  |
| rrnAC0500                                     | ND                  |                 |                                                                                             |     |     |            |      |     |   |       |    |  |
| rrnAC0501                                     | ND                  |                 |                                                                                             |     |     |            |      |     |   |       |    |  |
| rrnAC2418                                     | ND                  |                 |                                                                                             |     |     |            |      |     |   |       |    |  |
| rrnAC0396                                     | ND                  |                 |                                                                                             |     |     |            |      |     |   |       |    |  |
| rrnAC2536                                     | ND                  |                 |                                                                                             |     |     |            |      |     |   |       |    |  |
| pNG7050                                       | ND                  |                 |                                                                                             |     |     |            |      |     |   |       |    |  |
| rrnAC0394                                     | ND                  |                 |                                                                                             |     |     |            |      |     |   |       |    |  |
| rrnAC0479                                     | ND                  |                 |                                                                                             |     |     |            |      |     |   |       |    |  |
| rrnAC2535                                     | ND                  |                 |                                                                                             |     |     |            |      |     |   |       |    |  |
| rrnAC0666                                     | ND                  |                 |                                                                                             |     |     |            |      |     |   |       |    |  |
| rrnAC1369                                     | ND                  |                 |                                                                                             |     |     |            |      |     |   |       |    |  |
| pNG7391                                       | ND                  |                 |                                                                                             |     |     |            |      |     |   |       |    |  |
| pNG7389                                       | ND                  |                 |                                                                                             |     |     |            |      |     |   |       |    |  |
| pNG7388                                       | ND                  |                 |                                                                                             |     |     |            |      |     |   |       |    |  |
| pNG7392                                       | ND                  |                 |                                                                                             |     |     |            |      |     |   |       |    |  |
| pNG7387                                       | ND                  |                 |                                                                                             |     |     |            |      |     |   |       |    |  |
| <b>02010 ABC transporters [PATH:hma02010]</b> |                     |                 |                                                                                             |     |     |            |      |     |   |       |    |  |
| rrnB0321                                      | > 2 unique peptides | <i>phnE</i>     | Phosphonates ABC transporter permease protein                                               | 22  | 3   | <b>25</b>  | 7.33 | 25  | 0 | 100   | 5  |  |
| rrnB0322                                      | > 2 unique peptides | <i>phnD2</i>    | Phosphonates ABC transporter permease protein                                               | 12  | 2   | <b>14</b>  | 6    | 14  | 0 | 100   | 5  |  |
| rrnAC1505                                     | > 2 unique peptides | <i>pstB1</i>    | Phosphate import ATP-binding protein pstB 1 (EC 3.6.3.27) (Phosphate-transporting ATPase 1) | 18  | 4   | <b>22</b>  | 4.5  | 22  | 0 | 100   | 0  |  |
| rrnB0320                                      | > 2 unique peptides | <i>phnC2</i>    | Phosphonates import ATP-binding protein phnC 2 (EC 3.6.3.28)                                | 34  | 9   | <b>43</b>  | 3.78 | 42  | 1 | 97.67 | 0  |  |
| rrnB0319                                      | > 2 unique peptides | <i>phnD1</i>    | ABC transporter phosphate-binding protein                                                   | 250 | 73  | <b>323</b> | 3.42 | 323 | 0 | 100   | 0  |  |
| rrnB0207                                      | > 2 unique peptides | <i>rrnB0207</i> | Putative extracellular ligand binding protein                                               | 59  | 19  | <b>78</b>  | 3.11 | 78  | 0 | 100   | 0  |  |
| rrnAC0147                                     | > 2 unique peptides | <i>tpaA</i>     | Thiamine-binding periplasmic protein-like                                                   | 21  | 7   | <b>28</b>  | 3    | 28  | 0 | 100   | 0  |  |
| rrnB0204                                      | > 2 unique peptides | <i>livM-7</i>   | High-affinity branched-chain amino acid transport protein                                   | 5   | 2   | <b>7</b>   | 2.5  | 7   | 0 | 100   | 8  |  |
| rrnAC0906                                     | > 2 unique peptides | <i>ibp</i>      | Iron-binding protein                                                                        | 52  | 22  | <b>74</b>  | 2.36 | 74  | 0 | 100   | 0  |  |
| rrnAC2084                                     | > 2 unique peptides | <i>nosF-3</i>   | ABC transporter ATP-binding protein                                                         | 4   | 2   | <b>6</b>   | 2    | 6   | 0 | 100   | 0  |  |
| rrnAC2230                                     | > 2 unique peptides | <i>oppC1</i>    | Oligopeptide transport system permease protein OppC                                         | 21  | 12  | <b>33</b>  | 1.75 | 33  | 0 | 100   | 6  |  |
| rrnAC3297                                     | > 2 unique peptides | <i>oppC</i>     | Oligopeptide ABC transporter permease protein                                               | 65  | 39  | <b>104</b> | 1.67 | 104 | 0 | 100   | 8  |  |
| rrnAC1507                                     | > 2 unique peptides | <i>pstA2</i>    | Phosphate ABC transporter permease protein                                                  | 59  | 37  | <b>96</b>  | 1.59 | 96  | 0 | 100   | 14 |  |
| rrnAC0825                                     | > 2 unique peptides | <i>livM</i>     | High-affinity branched-chain amino acid transport protein                                   | 9   | 6   | <b>15</b>  | 1.5  | 15  | 0 | 100   | 8  |  |
| rrnAC1509                                     | > 2 unique peptides | <i>phoX</i>     | Phosphate ABC transporter phosphate-binding protein                                         | 20  | 14  | <b>34</b>  | 1.43 | 34  | 0 | 100   | 0  |  |
| rrnAC2228                                     | > 2 unique peptides | <i>dppD</i>     | Dipeptide ABC transporter ATP-binding                                                       | 551 | 392 | <b>943</b> | 1.41 | 943 | 0 | 100   | 0  |  |
| rrnAC0829                                     | > 2 unique peptides | <i>livF-4</i>   | Branched-chain amino acid ABC transporter ATP-binding protein                               | 5   | 4   | <b>9</b>   | 1.25 | 8   | 1 | 88.89 | 0  |  |



|                                                              |                     |                                           |                                                                                            |    |     |     |         |     |     |       |    |  |  |
|--------------------------------------------------------------|---------------------|-------------------------------------------|--------------------------------------------------------------------------------------------|----|-----|-----|---------|-----|-----|-------|----|--|--|
| rrnAC3372                                                    | ND                  |                                           |                                                                                            |    |     |     |         |     |     |       |    |  |  |
| rrnAC0500                                                    | ND                  |                                           |                                                                                            |    |     |     |         |     |     |       |    |  |  |
| rrnAC0501                                                    | ND                  |                                           |                                                                                            |    |     |     |         |     |     |       |    |  |  |
| rrnAC2418                                                    | ND                  |                                           |                                                                                            |    |     |     |         |     |     |       |    |  |  |
| rrnAC1369                                                    | ND                  |                                           |                                                                                            |    |     |     |         |     |     |       |    |  |  |
| <b>02060 Phosphotransferase system (PTS) [PATH:hma02060]</b> |                     |                                           |                                                                                            |    |     |     |         |     |     |       |    |  |  |
| pNG7391                                                      | ND                  |                                           |                                                                                            |    |     |     |         |     |     |       |    |  |  |
| pNG7388                                                      | ND                  |                                           |                                                                                            |    |     |     |         |     |     |       |    |  |  |
| pNG7392                                                      | ND                  |                                           |                                                                                            |    |     |     |         |     |     |       |    |  |  |
| pNG7387                                                      | ND                  |                                           |                                                                                            |    |     |     |         |     |     |       |    |  |  |
| <b>03070 Bacterial secretion system [PATH:hma03070]</b>      |                     |                                           |                                                                                            |    |     |     |         |     |     |       |    |  |  |
| rrnAC3118                                                    | > 2 unique peptides | <i>dpa</i>                                | Signal recognition particle receptor                                                       | 2  | 0   | 2   | #DIV/0! | 0   | 2   | 0     | 0  |  |  |
| rrnAC3124                                                    | > 2 unique peptides | <i>srp54</i>                              | Signal recognition 54 kDa protein                                                          | 8  | 2   | 10  | 4       | 2   | 8   | 20    | 0  |  |  |
| rrnAC2858                                                    | > 2 unique peptides | <i>tatC2</i>                              | SEC independent protein translocase TatC                                                   | 4  | 2   | 6   | 2       | 6   | 0   | 100   | 10 |  |  |
| rrnAC0524                                                    | > 2 unique peptides | <i>rrnAC0524</i>                          | Putative sEC independent translocation prot                                                | 16 | 11  | 27  | 1.45    | 27  | 0   | 100   | 1  |  |  |
| rrnAC3215                                                    | > 2 unique peptides | <i>secD</i>                               | Protein-export membrane protein SecD                                                       | 59 | 47  | 106 | 1.26    | 106 | 0   | 100   | 6  |  |  |
| rrnAC1589                                                    | > 2 unique peptides | <i>secY</i>                               | Preprotein translocase subunit secY (Protein transport protein SEC61subunit alpha homolog) | 62 | 51  | 113 | 1.22    | 113 | 0   | 100   | 9  |  |  |
| rrnAC3214                                                    | > 2 unique peptides | <i>secF</i>                               | Protein-export membrane protein SecF                                                       | 8  | 10  | 18  | 0.8     | 18  | 0   | 100   | 6  |  |  |
| rrnAC2857                                                    | single hit          | <i>tatC1</i>                              | SEC independent protein translocase protein TatC                                           | 2  | 1   | 3   | 2       | 3   | 0   | 100   | 14 |  |  |
| <b>02044 Secretion system</b>                                |                     |                                           |                                                                                            |    |     |     |         |     |     |       |    |  |  |
| rrnAC0041                                                    | > 2 unique peptides | <i>srp19</i>                              | Signal recognition particle 19 kDa protein                                                 | 5  | 3   | 8   | 1.67    | 0   | 8   | 0     | 0  |  |  |
| rrnAC0700                                                    | > 2 unique peptides | <i>secE</i>                               | Preprotein translocase subunit secE (Protein transport protein SEC61gamma subunit homolog) | 12 | 9   | 21  | 1.33    | 21  | 0   | 100   | 1  |  |  |
| pNG1026                                                      | > 2 unique peptides | <i>flaA2</i>                              | Flagellin A protein                                                                        | 5  | 6   | 11  | 0.83    | 11  | 0   | 100   | 1  |  |  |
| rrnAC0466                                                    | ND                  |                                           |                                                                                            |    |     |     |         |     |     |       |    |  |  |
| rrnB0018                                                     | ND                  |                                           |                                                                                            |    |     |     |         |     |     |       |    |  |  |
| rrnAC2198                                                    | ND                  |                                           |                                                                                            |    |     |     |         |     |     |       |    |  |  |
| rrnAC1482                                                    | ND                  |                                           |                                                                                            |    |     |     |         |     |     |       |    |  |  |
| rrnAC2191                                                    | ND                  |                                           |                                                                                            |    |     |     |         |     |     |       |    |  |  |
| rrnAC2190                                                    | ND                  |                                           |                                                                                            |    |     |     |         |     |     |       |    |  |  |
| rrnAC2187                                                    | ND                  |                                           |                                                                                            |    |     |     |         |     |     |       |    |  |  |
| rrnAC2186                                                    | ND                  |                                           |                                                                                            |    |     |     |         |     |     |       |    |  |  |
| rrnAC2184                                                    | ND                  |                                           |                                                                                            |    |     |     |         |     |     |       |    |  |  |
| rrnAC2183                                                    | ND                  |                                           |                                                                                            |    |     |     |         |     |     |       |    |  |  |
| rrnAC2645                                                    | ND                  |                                           |                                                                                            |    |     |     |         |     |     |       |    |  |  |
| <b>03060 Protein export [PATH:hma03060]</b>                  |                     |                                           |                                                                                            |    |     |     |         |     |     |       |    |  |  |
| rrnAC3118                                                    | > 2 unique peptides | <i>dpa</i>                                | Signal recognition particle receptor                                                       | 2  | 0   | 2   | #DIV/0! | 0   | 2   | 0     | 0  |  |  |
| rrnAC3124                                                    | > 2 unique peptides | <i>srp54</i>                              | Signal recognition 54 kDa protein                                                          | 8  | 2   | 10  | 4       | 2   | 8   | 20    | 0  |  |  |
| rrnAC2858                                                    | > 2 unique peptides | <i>tatC2</i>                              | SEC independent protein translocase TatC                                                   | 4  | 2   | 6   | 2       | 6   | 0   | 100   | 10 |  |  |
| rrnAC0041                                                    | > 2 unique peptides | <i>srp19</i>                              | Signal recognition particle 19 kDa protein                                                 | 5  | 3   | 8   | 1.67    | 0   | 8   | 0     | 0  |  |  |
| rrnAC0524                                                    | > 2 unique peptides | <i>rrnAC0524</i>                          | Putative sEC independent translocation prot                                                | 16 | 11  | 27  | 1.45    | 27  | 0   | 100   | 1  |  |  |
| rrnAC0700                                                    | > 2 unique peptides | <i>secE</i>                               | Preprotein translocase subunit secE (Protein transport protein SEC61gamma subunit homolog) | 12 | 9   | 21  | 1.33    | 21  | 0   | 100   | 1  |  |  |
| rrnAC2712                                                    | > 2 unique peptides | <i>sec11a</i>                             | Signal sequence peptidase                                                                  | 9  | 7   | 16  | 1.29    | 16  | 0   | 100   | 1  |  |  |
| rrnAC3215                                                    | > 2 unique peptides | <i>secD</i>                               | Protein-export membrane protein SecD                                                       | 59 | 47  | 106 | 1.26    | 106 | 0   | 100   | 6  |  |  |
| rrnAC1589                                                    | > 2 unique peptides | <i>secY</i>                               | Preprotein translocase subunit secY (Protein transport protein SEC61subunit alpha homolog) | 62 | 51  | 113 | 1.22    | 113 | 0   | 100   | 9  |  |  |
| rrnAC3214                                                    | > 2 unique peptides | <i>secF</i>                               | Protein-export membrane protein SecF                                                       | 8  | 10  | 18  | 0.8     | 18  | 0   | 100   | 6  |  |  |
| rrnAC2857                                                    | single hit          | <i>tatC1</i>                              | SEC independent protein translocase protein TatC                                           | 2  | 1   | 3   | 2       | 3   | 0   | 100   | 14 |  |  |
| rrnAC2713                                                    | ND                  |                                           |                                                                                            |    |     |     |         |     |     |       |    |  |  |
| rrnAC2982                                                    | ND                  |                                           |                                                                                            |    |     |     |         |     |     |       |    |  |  |
| <b>01132 Signal Transduction</b>                             |                     |                                           |                                                                                            |    |     |     |         |     |     |       |    |  |  |
| <b>02020 Two-component system [PATH:hma02020]</b>            |                     |                                           |                                                                                            |    |     |     |         |     |     |       |    |  |  |
| rrnAC0067                                                    | > 2 unique peptides | <i>rpoN</i>                               | DNA-directed RNA polymerase subunit N (EC 2.7.7.6)                                         | 2  | 0   | 2   | #DIV/0! | 0   | 2   | 0     | 0  |  |  |
| rrnAC1884                                                    | > 2 unique peptides | <i>trpA</i>                               | Tryptophan synthase alpha chain (EC 4.2.1.20)                                              | 5  | 1   | 6   | 5       | 0   | 6   | 0     | 0  |  |  |
| rrnAC3497                                                    | > 2 unique peptides | <i>yqeF</i>                               | Acetyl-coA acetyltransferase (EC 2.3.1.9)                                                  | 3  | 1   | 4   | 3       | 0   | 4   | 0     | 0  |  |  |
| rrnAC2205                                                    | > 2 unique peptides | <i>cheA3</i>                              | Chemotaxis protein CheA (EC 2.7.3.-)                                                       | 4  | 2   | 6   | 2       | 0   | 6   | 0     | 0  |  |  |
| rrnAC0896                                                    | > 2 unique peptides | <i>acaB3</i>                              | 3-ketoacyl-CoA thiolase (EC 2.3.1.9)                                                       | 30 | 16  | 46  | 1.88    | 0   | 46  | 0     | 0  |  |  |
| rrnAC1509                                                    | > 2 unique peptides | <i>phoX</i>                               | Phosphate ABC transporter phosphate-binding protein                                        | 20 | 14  | 34  | 1.43    | 34  | 0   | 100   | 0  |  |  |
| rrnB0242                                                     | > 2 unique peptides | <i>acaB2</i>                              | 3-ketoacyl-CoA thiolase (EC 2.3.1.9) (EC 2.3.1.16)                                         | 7  | 5   | 12  | 1.4     | 0   | 12  | 0     | 0  |  |  |
| rrnAC0709                                                    | > 2 unique peptides | <i>Anthranilate synthase component 11</i> | Anthranilate synthase component 1 1 (EC 4.1.3.27)                                          | 4  | 3   | 7   | 1.33    | 0   | 7   | 0     | 0  |  |  |
| rrnB0240                                                     | > 2 unique peptides | <i>aca1</i>                               | Acetyl-coA acetyltransferase (EC 2.3.1.9)                                                  | 31 | 25  | 56  | 1.24    | 2   | 54  | 3.57  | 0  |  |  |
| rrnAC2780                                                    | > 2 unique peptides | <i>glnA</i>                               | Glutamine synthetase (EC 6.3.1.2)                                                          | 99 | 83  | 182 | 1.19    | 18  | 164 | 9.89  | 0  |  |  |
| rrnAC2815                                                    | > 2 unique peptides | <i>aca2</i>                               | Acetyl-coA acetyltransferase (EC 2.3.1.9)                                                  | 57 | 51  | 108 | 1.12    | 2   | 106 | 1.85  | 0  |  |  |
| rrnB0309                                                     | > 2 unique peptides | <i>acaB1</i>                              | 3-ketoacyl-CoA thiolase (EC 2.3.1.9)                                                       | 2  | 2   | 4   | 1       | 0   | 4   | 0     | 0  |  |  |
| rrnAC3306                                                    | > 2 unique peptides | <i>trpD1</i>                              | Anthranilate phosphoribosyltransferase (EC 2.4.2.18)                                       | 51 | 53  | 104 | 0.96    | 1   | 103 | 0.96  | 0  |  |  |
| rrnAC2149                                                    | > 2 unique peptides | <i>yqgG</i>                               | Phosphate ABC transporter binding                                                          | 79 | 726 | 805 | 0.11    | 802 | 3   | 99.63 | 0  |  |  |
| rrnAC1520                                                    | single hit          | <i>trpD</i>                               | Anthranilate phosphoribosyltransferase (EC 2.4.2.18)                                       | 3  | 2   | 5   | 1.5     | 1   | 4   | 20    | 0  |  |  |
| pNG7327                                                      | single hit          | <i>trpE3</i>                              | Anthranilate synthase component 1 3 (EC 4.1.3.27)                                          | 0  | 1   | 1   | 0       | 0   | 1   | 0     | 0  |  |  |
| rrnAC0053                                                    | single hit          | <i>citG</i>                               | CitG family protein                                                                        | 0  | 1   | 1   | 0       | 0   | 1   | 0     | 0  |  |  |
| rrnAC2621                                                    | single hit          | <i>glnB</i>                               | Nitrogen regulatory protein P-II                                                           | 0  | 1   | 1   | 0       | 0   | 1   | 0     | 0  |  |  |



|                                                   |                     |                  |                                                    |    |    |           |         |    |    |       |   |
|---------------------------------------------------|---------------------|------------------|----------------------------------------------------|----|----|-----------|---------|----|----|-------|---|
| rrnAC1478                                         | ND                  |                  |                                                    |    |    |           |         |    |    |       |   |
| rrnAC1885                                         | ND                  |                  |                                                    |    |    |           |         |    |    |       |   |
| rrnAC1886                                         | ND                  |                  |                                                    |    |    |           |         |    |    |       |   |
| rrnAC1518                                         | ND                  |                  |                                                    |    |    |           |         |    |    |       |   |
| rrnAC0690                                         | ND                  |                  |                                                    |    |    |           |         |    |    |       |   |
| rrnAC1199                                         | ND                  |                  |                                                    |    |    |           |         |    |    |       |   |
| rrnAC1200                                         | ND                  |                  |                                                    |    |    |           |         |    |    |       |   |
| rrnAC1761                                         | ND                  |                  |                                                    |    |    |           |         |    |    |       |   |
| rrnAC2206                                         | ND                  |                  |                                                    |    |    |           |         |    |    |       |   |
| rrnAC1484                                         | ND                  |                  |                                                    |    |    |           |         |    |    |       |   |
| rrnAC2203                                         | ND                  |                  |                                                    |    |    |           |         |    |    |       |   |
| rrnAC2193                                         | ND                  |                  |                                                    |    |    |           |         |    |    |       |   |
| rrnAC2194                                         | ND                  |                  |                                                    |    |    |           |         |    |    |       |   |
| rrnAC2204                                         | ND                  |                  |                                                    |    |    |           |         |    |    |       |   |
|                                                   |                     |                  |                                                    |    |    |           |         |    |    |       |   |
|                                                   |                     |                  |                                                    |    |    |           |         |    |    |       |   |
| <b>01133 Signaling Molecules and Interaction</b>  |                     |                  |                                                    |    |    |           |         |    |    |       |   |
| <b>04000 Receptors and channels</b>               |                     |                  |                                                    |    |    |           |         |    |    |       |   |
| rrnAC3161                                         | > 2 unique peptides | <i>bop</i>       | Bacteriorhodopsin                                  | 32 | 55 | <b>87</b> | 0.58    | 87 | 0  | 100   | 7 |
| rrnAC2030                                         | > 2 unique peptides | <i>xop1</i>      | Bacteriorhodopsin                                  | 7  | 20 | <b>27</b> | 0.35    | 27 | 0  | 100   | 7 |
| rrnAC1659                                         | single hit          | <i>hop</i>       | Halorhodopsin                                      | 0  | 1  | <b>1</b>  | 0       | 1  | 0  | 100   | 7 |
| <b>02042 Bacterial toxins</b>                     |                     |                  |                                                    |    |    |           |         |    |    |       |   |
| rrnAC2600                                         | > 2 unique peptides | <i>rrnAC2600</i> | Hypothetical protein                               | 49 | 38 | <b>87</b> | 1.29    | 87 | 0  | 100   | 2 |
| pNG5066                                           | ND                  |                  |                                                    |    |    |           |         |    |    |       |   |
|                                                   |                     |                  |                                                    |    |    |           |         |    |    |       |   |
| <b>01141 Cell Motility</b>                        |                     |                  |                                                    |    |    |           |         |    |    |       |   |
| <b>02030 Bacterial chemotaxis [PATH:hma02030]</b> |                     |                  |                                                    |    |    |           |         |    |    |       |   |
| rrnAC2205                                         | > 2 unique peptides | <i>cheA3</i>     | Chemotaxis protein CheA (EC 2.7.3.-)               | 4  | 2  | <b>6</b>  | 2       | 0  | 6  | 0     | 0 |
| rrnAC1258                                         | single hit          | <i>cheC2</i>     | Chemotaxis protein CheC                            | 0  | 1  | <b>1</b>  | 0       | 0  | 1  | 0     | 0 |
| rrnAC2425                                         | ND                  |                  |                                                    |    |    |           |         |    |    |       |   |
| rrnAC2633                                         | ND                  |                  |                                                    |    |    |           |         |    |    |       |   |
| rrnAC2193                                         | ND                  |                  |                                                    |    |    |           |         |    |    |       |   |
| rrnAC1484                                         | ND                  |                  |                                                    |    |    |           |         |    |    |       |   |
| rrnAC2203                                         | ND                  |                  |                                                    |    |    |           |         |    |    |       |   |
| rrnAC2194                                         | ND                  |                  |                                                    |    |    |           |         |    |    |       |   |
| rrnAC0528                                         | ND                  |                  |                                                    |    |    |           |         |    |    |       |   |
| rrnAC2204                                         | ND                  |                  |                                                    |    |    |           |         |    |    |       |   |
| rrnAC2192                                         | ND                  |                  |                                                    |    |    |           |         |    |    |       |   |
| rrnAC2206                                         | ND                  |                  |                                                    |    |    |           |         |    |    |       |   |
| <b>02035 Bacterial motility proteins</b>          |                     |                  |                                                    |    |    |           |         |    |    |       |   |
| pNG1026                                           | > 2 unique peptides | <i>flaA2</i>     | Flagellin A protein                                | 5  | 6  | <b>11</b> | 0.83    | 11 | 0  | 100   | 1 |
| rrnB0018                                          | ND                  |                  |                                                    |    |    |           |         |    |    |       |   |
| rrnAC2198                                         | ND                  |                  |                                                    |    |    |           |         |    |    |       |   |
| rrnAC1482                                         | ND                  |                  |                                                    |    |    |           |         |    |    |       |   |
| rrnAC2191                                         | ND                  |                  |                                                    |    |    |           |         |    |    |       |   |
| rrnAC2190                                         | ND                  |                  |                                                    |    |    |           |         |    |    |       |   |
| rrnAC2187                                         | ND                  |                  |                                                    |    |    |           |         |    |    |       |   |
| rrnAC2186                                         | ND                  |                  |                                                    |    |    |           |         |    |    |       |   |
| rrnAC2184                                         | ND                  |                  |                                                    |    |    |           |         |    |    |       |   |
| rrnAC2183                                         | ND                  |                  |                                                    |    |    |           |         |    |    |       |   |
| rrnAC0466                                         | ND                  |                  |                                                    |    |    |           |         |    |    |       |   |
| <b>04812 Cytoskeleton proteins</b>                |                     |                  |                                                    |    |    |           |         |    |    |       |   |
| rrnB0062                                          | > 2 unique peptides | <i>parA3</i>     | Chromosome partitioning protein ParA family ATPase | 2  | 0  | <b>2</b>  | #DIV/0! | 0  | 2  | 0     | 0 |
| rrnAC2004                                         | > 2 unique peptides | <i>ftsZ3</i>     | Cell division protein FtsZ                         | 9  | 5  | <b>14</b> | 1.8     | 4  | 10 | 28.57 | 0 |
| rrnAC0703                                         | > 2 unique peptides | <i>ftsZ1</i>     | Cell division protein FtsZ                         | 19 | 23 | <b>42</b> | 0.83    | 9  | 33 | 21.43 | 0 |
| pNG6012                                           | > 2 unique peptides | <i>parA2</i>     | Partition protein                                  | 7  | 9  | <b>16</b> | 0.78    | 0  | 16 | 0     | 0 |
| pNG2014                                           | single hit          | <i>sojC</i>      | Chromosome partitioning protein                    | 0  | 2  | <b>2</b>  | 0       | 0  | 2  | 0     | 0 |
| rrnAC1227                                         | ND                  |                  |                                                    |    |    |           |         |    |    |       |   |
| rrnAC1880                                         | ND                  |                  |                                                    |    |    |           |         |    |    |       |   |
| rrnAC1939                                         | ND                  |                  |                                                    |    |    |           |         |    |    |       |   |
| rrnAC2768                                         | ND                  |                  |                                                    |    |    |           |         |    |    |       |   |
| rrnAC3166                                         | ND                  |                  |                                                    |    |    |           |         |    |    |       |   |
| pNG4012                                           | ND                  |                  |                                                    |    |    |           |         |    |    |       |   |

ND: Not detected
