# Supplementary material
Source: PubMed Central journal article supplement (PMC3168985)
Supplement: NIHMS304204-supplement-11_si_011.pdf [file NIHMS304204-supplement-11_si_011.pdf]

Supplementary Table 11. Comparison of the number of peptides of the genetic information processing proteins identified in OD 0.7 and 1.2

| Transcription                      |           |                                                    |                           |                           |            | Translation                                    |           |                                                           |                           |                           |            |
|------------------------------------|-----------|----------------------------------------------------|---------------------------|---------------------------|------------|------------------------------------------------|-----------|-----------------------------------------------------------|---------------------------|---------------------------|------------|
| Locus name                         | Gene name | Protein description                                | Total no. peptides OD 0.7 | Total no. peptides OD 1.2 | OD 0.7/1.2 | Locus name                                     | Gene name | Protein description                                       | Total no. peptides OD 0.7 | Total no. peptides OD 1.2 | OD 0.7/1.2 |
| <b>RNA polymerase</b>              |           |                                                    |                           |                           |            | <b>Aminoacyl-tRNA biosynthesis (continued)</b> |           |                                                           |                           |                           |            |
| rrnAC0067                          | rpoN      | DNA-directed RNA polymerase subunit N              | 2                         | 0                         | ∞          | rrnAC1355                                      | gatA      | Glutamyl-tRNA synthetase                                  | 3                         | 4                         | 0.8        |
| rrnAC2829                          | rpoE      | DNA-directed RNA polymerase subunit E'             | 22                        | 7                         | 3.1 *      | rrnAC3183                                      | hisS      | Histidyl-tRNA synthetase                                  | 9                         | 13                        | 0.7        |
| rrnAC2432                          | rpoH      | DNA-directed RNA polymerase subunit H              | 9                         | 3                         | 3.0 *      | rrnAC0543                                      | tyrS      | Tyrosyl-tRNA synthetase                                   | 8                         | 14                        | 0.6        |
| rrnAC2428                          | rpoA      | DNA-directed RNA polymerase                        | 70                        | 41                        | 1.7        | rrnAC2634                                      | ileS      | Isoleucyl-tRNA synthetase                                 | 25                        | 45                        | 0.6        |
| rrnAC2430                          | rpoB      | DNA-directed RNA polymerase subunit B              | 54                        | 34                        | 1.6        | rrnAC1729                                      | valS      | Valyl-tRNA synthetase                                     | 8                         | 18                        | 0.4        |
| rrnAC2830                          | rpoE      | DNA-directed RNA polymerase subunit E              | 3                         | 2                         | 1.5        | rrnAC0517                                      | alaS2     | Alanyl-tRNA synthetase                                    | 6                         | 14                        | 0.4        |
| rrnAC2429                          | rpoB      | DNA-directed RNA polymerase beta subunit           | 56                        | 40                        | 1.4        | rrnAC2701                                      | glyS      | Glycyl-tRNA synthetase                                    | 6                         | 14                        | 0.4        |
| rrnAC2427                          | rpoC      | RNA polymerase Rpb1 domain 5                       | 22                        | 16                        | 1.4        | rrnAC3442                                      | asbA      | L-asparaginase                                            | 0                         | 7                         | 0          |
| rrnAC0259                          | rpb4      | RNA polymerase Rpb4                                | 20                        | 17                        | 1.2        | rrnAC1292                                      | cysS      | Cysteinyl-tRNA synthetase                                 | 0                         | 5                         | 0          |
| rrnAC1396                          | rpoL      | DNA-directed RNA polymerase subunit L              | 4                         | 4                         | 1.0        | <b>Chaperones and folding catalysts</b>        |           |                                                           |                           |                           |            |
| rrnAC0062                          | rpoD      | DNA-directed RNA polymerase subunit D              | 4                         | 7                         | 0.6        | rrnAC1308                                      | rrnAC130  | Glutaredoxin                                              | 20                        | 19                        | 1.1        |
| rrnAC0218                          | rpoM      | DNA-directed RNA-polymerase subunit M              | 0                         | 1                         | 0          | rrnAC3116                                      | pfidA     | Prefoldin alpha subunit                                   | 33                        | 33                        | 1.0        |
| <b>Basal transcription factors</b> |           |                                                    |                           |                           |            | rrnAC3303                                      | ppiB1     | Peptidyl-prolyl cis-trans isomerase                       | 25                        | 25                        | 1.0        |
| rrnAC0016                          | tfbA      | Transcription initiation factor IIB                | 4                         | 0                         | ∞          | rrnAC1680                                      | pfidB     | Prefoldin beta subunit                                    | 30                        | 31                        | 1.0        |
| rrnAC0861                          | tfeA      | Transcription initiation factor IIE alpha subunit  | 9                         | 3                         | 3.0 *      | rrnAC2110                                      | trxA3     | Thioredoxin                                               | 26                        | 27                        | 1.0        |
| rrnAC0681                          | thpE      | TATA-box binding protein E                         | 22                        | 12                        | 1.8        | rrnAC3339                                      | dnaK      | Chaperone protein dnaK                                    | 57                        | 71                        | 0.8        |
| <b>Transcription factors</b>       |           |                                                    |                           |                           |            | rrnAC1230                                      | styD      | Peptidyl-prolyl cis-trans isomerase                       | 43                        | 57                        | 0.8        |
| rrnAC2744                          | rrnAC274  | Hypothetical protein                               | 5                         | 3                         | 1.7        | rrnAC3340                                      | grpE      | Heat shock protein GrpE protein                           | 3                         | 7                         | 0.4        |
| pNG2007                            | pNG2007   | Hypothetical protein                               | 18                        | 11                        | 1.6        | <b>Ubiquitin system</b>                        |           |                                                           |                           |                           |            |
| rrnAC1133                          | rpaA      | Replication protein A                              | 12                        | 17                        | 0.7        | rrnAC1773                                      | psmA2     | Proteasome alpha subunit                                  | 47                        | 20                        | 2.4        |
| rrnAC1765                          | tenA      | Transcriptional activator tenA                     | 3                         | 21                        | 0.1 *      | rrnAC0442                                      | psmA3     | Proteasome subunit alpha                                  | 6                         | 4                         | 1.5        |
| rrnAC0001                          | birA      | Biotin-(acetyl-CoA carboxylase) ligase             | 0                         | 5                         | 0          | rrnAC3190                                      | pan1      | Proteasome-activating nucleotidase 1                      | 12                        | 8                         | 1.5        |
| rrnAC1767                          | tenA-2    | Transcriptional regulator putative                 | 0                         | 9                         | 0          | rrnAC1174                                      | psmA1     | Proteasome alpha subunit                                  | 50                        | 38                        | 1.3        |
| rrnAC0496                          | sirR      | Transcription repressor                            | 1                         | 0                         | ∞          | rrnAC3546                                      | pan2      | Proteasome-activating nucleotidase 2                      | 21                        | 26                        | 0.8        |
| rrnAC1715                          | cspD1     | Cold shock protein                                 | 1                         | 0                         | ∞          | rrnAC1772                                      | psmA      | Proteasome subunit alpha                                  | 5                         | 9                         | 0.6        |
| rrnAC2339                          | cspD3     | Cold shock protein                                 | 50                        | 12                        | 4.2        | <b>RNA degradation</b>                         |           |                                                           |                           |                           |            |
| rrnAC1714                          | cspD5     | Cold shock protein                                 | 3                         | 1                         | 3.0        | rrnAC0069                                      | eno       | Enolase                                                   | 24                        | 23                        | 1.0        |
| rrnAC1269                          | asnC2     | Transcription regulator AsnC family                | 1                         | 2                         | 2.5        | rrnAC2072                                      | vacB      | Ribonuclease R                                            | 10                        | 12                        | 0.8        |
| rrnAC3264                          | rrnAC326  | Putative molybdenum-binding protein                | 5                         | 2                         | 0.5        | rrnAC3339                                      | dnaK      | Chaperone protein dnaK                                    | 57                        | 71                        | 0.8        |
| rrnAC2283                          | copG1     | Transcriptional regulator CopG family              | 0                         | 1                         | 0          | pNG7302                                        | ppk       | Polyphosphate kinase                                      | 0                         | 8                         | 0          |
| <b>Ribosome</b>                    |           |                                                    |                           |                           |            | <b>DNA replication</b>                         |           |                                                           |                           |                           |            |
| rrnAC1596                          | rpl6p     | 50S ribosomal protein L6P                          | 5                         | 0                         | ∞          | rrnAC2744                                      | rrnAC274  | Hypothetical protein                                      | 5                         | 3                         | 1.7        |
| rrnAC1418                          | rpl12p    | 50S ribosomal protein L12P                         | 3                         | 0                         | ∞          | pNG2007                                        | pNG2007   | Hypothetical protein                                      | 18                        | 11                        | 1.6        |
| rrnAC1607                          | rps19p    | 30S ribosomal protein S19P                         | 12                        | 2                         | 6.0 *      | rrnAC2851                                      | pcn       | DNA polymerase sliding clamp                              | 24                        | 33                        | 0.7        |
| rrnAC1604                          | rpl29p    | 50S ribosomal protein L29P                         | 5                         | 1                         | 5.0 *      | rrnAC1133                                      | rpaA      | Replication protein A                                     | 12                        | 17                        | 0.7        |
| rrnAC0059                          | rps4p     | 30S ribosomal protein S4P                          | 27                        | 7                         | 3.9 *      | <b>DNA replication proteins</b>                |           |                                                           |                           |                           |            |
| rrnAC0061                          | rps11p    | 30S ribosomal protein S11P                         | 23                        | 6                         | 3.8 *      | rrnAC0455                                      | gyrA      | DNA gyrase subunit A                                      | 13                        | 4                         | 3.2 *      |
| rrnAC1598                          | rpl5p     | 50S ribosomal protein L5P                          | 13                        | 4                         | 3.3 *      | rrnAC2691                                      | polC      | DNA polymerase II large subunit                           | 3                         | 1                         | 3.0 *      |
| rrnAC0058                          | rps13p    | 30S ribosomal protein S13P                         | 21                        | 8                         | 2.6        | rrnAC1645                                      | topA      | DNA topoisomerase I                                       | 4                         | 2                         | 2.0        |
| rrnAC2488                          | rps24e    | 30S ribosomal protein S24e                         | 16                        | 6                         | 2.7        | rrnAC2565                                      | rfeS      | Replication factor C small subunit                        | 12                        | 7                         | 1.7        |
| rrnAC1605                          | rps3p     | 30S ribosomal protein S3P                          | 53                        | 21                        | 2.5        | rrnAC0457                                      | top6B     | Type II DNA topoisomerase VI subunit B                    | 37                        | 24                        | 1.5        |
| rrnAC1417                          | rplP0     | 50S ribosomal protein L10E                         | 17                        | 8                         | 2.1        | rrnAC0456                                      | gyrB      | DNA gyrase subunit B                                      | 7                         | 5                         | 1.4        |
| rrnAC1429                          | rps3Ae    | 30S ribosomal protein S3Ae                         | 80                        | 39                        | 2.1        | rrnAC2487                                      | rfeC2     | Replication factor C small subunit                        | 5                         | 4                         | 1.3        |
| rrnAC1600                          | rps4e     | 30S ribosomal protein S4e                          | 34                        | 17                        | 2.0        | rrnAC1831                                      | polB1     | DNA polymerase B elongation subunit                       | 1                         | 2                         | 0.5        |
| rrnAC2212                          | rps6e     | 30S ribosomal protein S6e                          | 14                        | 7                         | 2.0        | rrnAC0459                                      | top6A     | Type II DNA topoisomerase VI subunit A                    | 2                         | 5                         | 0.4        |
| rrnAC1610                          | rpl4p     | 50S ribosomal protein L4P                          | 2                         | 1                         | 2.0        | rrnAC2762                                      | mcm2      | Cell division control protein 21                          | 1                         | 1                         | 1.0        |
| rrnAC2357                          | rpl10e    | 50S ribosomal protein L10e                         | 14                        | 7                         | 2.0        | rrnAC0292                                      | priA      | Probable DNA primase small subunit                        | 0                         | 1                         | 0          |
| rrnAC1592                          | rps5p     | 30S ribosomal protein S5P                          | 63                        | 35                        | 1.8        | <b>Chromosome</b>                              |           |                                                           |                           |                           |            |
| rrnAC1611                          | rpl3p     | 50S ribosomal protein L3P                          | 91                        | 57                        | 1.6        | rrnB0062                                       | parA3     | Chromosome partitioning protein ParA family               | 2                         | 0                         | ∞          |
| rrnAC0064                          | rpl18e    | 50S ribosomal protein L18e                         | 41                        | 26                        | 1.6        | rrnAC0974                                      | rrnAC097  | Hypothetical protein                                      | 3                         | 0                         | ∞          |
| rrnAC1595                          | rpl32e    | 50S ribosomal protein L32e                         | 8                         | 5                         | 1.6        | rrnAC2004                                      | ftsZ3     | Cell division protein FtsZ                                | 9                         | 5                         | 1.8        |
| rrnAC1426                          | rps15p    | 30S ribosomal protein S15P/S13e                    | 18                        | 12                        | 1.5        | rrnAC0665                                      | abcP-2    | ABC transporter permease protein                          | 5                         | 5                         | 1.0        |
| rrnAC3179                          | rps19e    | 30S ribosomal protein S19e                         | 22                        | 15                        | 1.5        | rrnAC0703                                      | ftsZ1     | Cell division protein FtsZ                                | 19                        | 23                        | 0.8        |
| rrnAC0070                          | rps2p     | 30S ribosomal protein S2P                          | 26                        | 18                        | 1.4        | pNG6012                                        | parA2     | Partition protein                                         | 7                         | 9                         | 0.8        |
| rrnAC2065                          | rpl15e    | 50S ribosomal protein L15e                         | 16                        | 11                        | 1.5        | rrnAC0056                                      | mrp1      | Mrp protein-like                                          | 5                         | 7                         | 0.7        |
| rrnAC1608                          | rpl2p     | 50S ribosomal protein L2P                          | 24                        | 17                        | 1.4        | rrnAC1639                                      | smc2      | Chromosome segregation protein                            | 1                         | 0                         | ∞          |
| rrnAC3112                          | rpl39e    | 50S ribosomal protein L39e                         | 7                         | 5                         | 1.4        | pNG2014                                        | sojC      | Chromosome partitioning protein                           | 0                         | 2                         | 0          |
| rrnAC1511                          | rps8e     | 30S ribosomal protein S8e                          | 12                        | 9                         | 1.3        | <b>Base excision repair</b>                    |           |                                                           |                           |                           |            |
| rrnAC1591                          | rpl30p    | 50S ribosomal protein L30P                         | 9                         | 7                         | 1.3        | rrnAC2015                                      | nfo       | Probable endonuclease 4                                   | 3                         | 2                         | 1.5        |
| rrnAC1603                          | rps17p    | 30S ribosomal protein S17P                         | 10                        | 8                         | 1.3        | pNG7116                                        | nthC      | Endonuclease III                                          | 4                         | 4                         | 1.0        |
| rrnAC0260                          | rpl21e    | 50S ribosomal protein L21e                         | 5                         | 4                         | 1.3        | rrnAC2851                                      | pcn       | DNA polymerase sliding clamp                              | 24                        | 33                        | 0.7        |
| rrnAC0055                          | rps17e    | 30S ribosomal protein S17e                         | 6                         | 5                         | 1.2        | rrnAC0265                                      | apl       | AP-endonuclease/AP-lyase                                  | 4                         | 7                         | 0.6        |
| rrnAC1606                          | rpl22p    | 50S ribosomal protein L22P                         | 12                        | 10                        | 1.2        | rrnAC0739                                      | nthA      | Endonuclease III                                          | 1                         | 1                         | 1.0        |
| rrnAC0065                          | rpl13p    | 50S ribosomal protein L13P                         | 30                        | 27                        | 1.1        | rrnAC1088                                      | alkA      | DNA-3-methyladenine glycosylase                           | 0                         | 2                         | 0          |
| rrnAC1597                          | rps8p     | 30S ribosomal protein S8P                          | 7                         | 7                         | 1.0        | <b>Nucleotide excision repair</b>              |           |                                                           |                           |                           |            |
| rrnAC2424                          | rps12p    | 30S ribosomal protein S12P                         | 15                        | 15                        | 1.0        | rrnAC2996                                      | uvrB      | UvrABC system protein B                                   | 2                         | 0                         | ∞          |
| rrnAC0103                          | rpl7ae    | 50S ribosomal protein L7Ae                         | 16                        | 16                        | 1.0        | rrnAC2267                                      | uvrD      | Repair helicase                                           | 27                        | 9                         | 3.0 *      |
| rrnAC2423                          | rps7p     | 30S ribosomal protein S7P                          | 35                        | 40                        | 0.9        | rrnAC2116                                      | uvrA      | Excinuclease ABC subunit A                                | 14                        | 8                         | 1.8        |
| rrnAC1602                          | rpl4p     | 50S ribosomal protein L14P                         | 21                        | 29                        | 0.7        | rrnAC2744                                      | rrnAC274  | Hypothetical protein                                      | 5                         | 3                         | 1.7        |
| rrnAC3113                          | rpl31e    | 50S ribosomal protein L31e                         | 4                         | 6                         | 0.7        | pNG2007                                        | pNG2007   | Hypothetical protein                                      | 18                        | 11                        | 1.6        |
| rrnAC1415                          | rpl1p5    | 50S ribosomal protein L1P                          | 1                         | 2                         | 0.5        | rrnAC2851                                      | pcn       | DNA polymerase sliding clamp                              | 24                        | 33                        | 0.7        |
| rrnAC1594                          | rpl19e    | 50S ribosomal protein L19e                         | 2                         | 5                         | 0.4        | rrnAC1133                                      | rpaA      | Replication protein A                                     | 12                        | 17                        | 0.7        |
| rrnAC1590                          | rpl15p    | 50S ribosomal protein L15P                         | 10                        | 28                        | 0.4        | <b>Mismatch repair</b>                         |           |                                                           |                           |                           |            |
| rrnAC2405                          | rps10p    | 30S ribosomal protein S10P                         | 1                         | 3                         | 0.3 *      | rrnB0041                                       | xseA2     | Probable exodeoxyribonuclease VII large subunit           | 3                         | 0                         | ∞          |
| rrnAC3513                          | rps27E    | 30S ribosomal protein S27e                         | 1                         | 3                         | 0.3 *      | rrnAC2267                                      | uvrD      | Repair helicase                                           | 27                        | 9                         | 3.0 *      |
| rrnAC1609                          | rpl23p    | 50S ribosomal protein L23P                         | 1                         | 0                         | ∞          | rrnAC2532                                      | mutS1     | DNA mismatch repair protein mutS 1                        | 2                         | 1                         | 2.0        |
| rrnAC0066                          | rps9p     | 30S ribosomal protein S9P                          | 6                         | 3                         | 2.0        | rrnAC2744                                      | rrnAC274  | Hypothetical protein                                      | 5                         | 3                         | 1.7        |
| rrnAC1414                          | rpl11p    | 50S ribosomal protein L11P                         | 2                         | 1                         | 2.0        | pNG2007                                        | pNG2007   | Hypothetical protein                                      | 18                        | 11                        | 1.6        |
| rrnAC1593                          | rpl18p    | 50S ribosomal protein L18P                         | 3                         | 3                         | 1.0        | rrnAC2851                                      | pcn       | DNA polymerase sliding clamp                              | 24                        | 33                        | 0.7        |
| rrnAC2489                          | rps27ae   | 30S ribosomal protein S27ae                        | 0                         | 1                         | 0          | rrnAC1133                                      | rpaA      | Replication protein A                                     | 12                        | 17                        | 0.7        |
| rrnAC1601                          | rpl24p    | 50S ribosomal protein L24P                         | 0                         | 1                         | 0          | rrnAC2550                                      | mutL      | DNA mismatch repair protein mutL                          | 2                         | 3                         | 0.7        |
| <b>Translation factors</b>         |           |                                                    |                           |                           |            | pNG6094                                        | xseA1     | Probable exodeoxyribonuclease VII large subunit           | 0                         | 2                         | 0          |
| rrnAC0261                          | ef1b      | Elongation factor 1-beta                           | 13                        | 6                         | 2.2        | <b>Homologous recombination</b>                |           |                                                           |                           |                           |            |
| rrnAC3164                          | prf1      | Peptide chain release factor subunit 1             | 11                        | 6                         | 1.8        | rrnAC2744                                      | rrnAC274  | Hypothetical protein                                      | 5                         | 3                         | 1.7        |
| rrnAC1956                          | ef2BD2    | Translation initiation factor eIF-2B subunit delta | 10                        | 7                         | 1.4        | pNG2007                                        | pNG2007   | Hypothetical protein                                      | 18                        | 11                        | 1.6        |
| rrnAC2413                          | fusA      | Elongation factor 2                                | 148                       | 141                       | 1.1        | rrnAC1133                                      | rpaA      | Replication protein A                                     | 12                        | 17                        | 0.7        |
| rrnAC2474                          | ef1A      | Translation initiation factor 1A                   | 19                        | 19                        | 1.0        | <b>DNA repair and recombination proteins</b>   |           |                                                           |                           |                           |            |
| rrnAC2827                          | ef2g      | Translation initiation factor 2 gamma subunit      | 11                        | 11                        | 1.0        | rrnAC2996                                      | uvrB      | UvrABC system protein B                                   | 2                         | 0                         | ∞          |
| rrnAC1929                          | ef5a      | Translation initiation factor 5A                   | 13                        | 13                        | 1.0        | rrnB0041                                       | xseA2     | Probable exodeoxyribonuclease VII large subunit           | 3                         | 0                         | ∞          |
| rrnAC2445                          | sui1      | Protein translation factor SUI1 homolog            | 9                         | 9                         | 1.0        | rrnAC0455                                      | gyrA      | DNA gyrase subunit A                                      | 13                        | 4                         | 3.3 *      |
| rrnAC0289                          | ef2BD1    | Translation initiation factor eIF-2B subunit delta | 16                        | 19                        | 0.8        | rrnAC2267                                      | uvrD      | Repair helicase                                           | 27                        | 9                         | 3.0 *      |
| rrnAC2406                          | tuf       | Elongation factor 1-alpha                          | 141                       | 222                       | 0.6        | rrnAC0832                                      | phrB1     | Deoxyribodipyrimidine photolyase                          | 2                         | 1                         | 2.0        |
| rrnAC3512                          | ef2a      | Translation initiation factor 2 alpha subunit      | 8                         | 13                        | 0.6        | rrnAC2159                                      | dcd3      | Probable deoxyuridine 5'-triphosphate nucleotidohydrolase | 2                         | 1                         | 2.0        |
| rrnAC0138                          | ef2B1     | Probable translation initiation factor 2 beta      | 4                         | 7                         | 0.6        | rrnAC2532                                      | mutS1     | DNA mismatch repair protein mutS 1                        | 2                         | 1                         | 2.0        |
| rrnAC1619                          | gbb2      | GTP-binding protein-like                           | 2                         | 5                         | 0.4        | rrnAC1840                                      | smc1      | Structural maintenance of chromosomes                     | 2                         | 1                         | 2.0        |
| rrnAC3203                          | infB      | Probable translation initiation factor IF-2        | 3                         | 10                        | 0.3 *      | rrnAC2847                                      | hjr       | Holliday junction resolvase                               | 4                         | 2                         | 2.0        |
| <b>Aminoacyl-tRNA biosynthesis</b> |           |                                                    |                           |                           |            | rrnAC1645                                      | topA      | DNA topoisomerase I                                       | 4                         | 2                         | 2.0        |
| rrnAC2967                          | pheT      | Phenylalanyl-tRNA synthetase beta chain            | 20                        | 15                        | 1.3        | rrnAC2116                                      | uvrA      | Excinuclease ABC subunit A                                | 14                        | 8                         | 1.8        |
| rrnAC3462                          | thrS      | Threonyl-tRNA synthetase                           | 15                        | 12                        | 1.3        | rrnAC2744                                      | rrnAC274  | Hypothetical protein                                      | 5                         | 3                         | 1.7        |
| rrnAC1800                          | metG      | Methionyl-tRNA synthetase                          | 24                        | 20                        | 1.2        | pNG2007                                        | pNG2007   | Hypothetical protein                                      | 18                        | 11                        | 1.6        |
| rrnAC3173                          | lysS      | Lysyl-tRNA synthetase                              | 6                         | 5                         | 1.2        | rrnAC2015                                      | nfo       | Probable endonuclease 4                                   | 3                         | 2                         | 1.5        |
| rrnAC2966                          | pheS      | Phenylalanyl-tRNA synthetase alpha chain           | 7                         | 6                         | 1.2        | rrnAC0456                                      | gyrB      | DNA gyrase subunit B                                      | 7                         | 5                         | 1.4        |
| rrnAC2650                          | leuS1     | Leucyl-tRNA synthetase                             | 16                        | 14                        | 1.1        | rrnAC1622                                      | rrdA      | Ribonucleoside-diphosphate reductase alpha chain          | 108                       | 91                        | 1.2        |
| rrnAC2808                          | serS      | Seryl-tRNA synthetase                              | 19                        | 17                        | 1.1        | rrnAC0669                                      | polX      | DNA polymerase IV                                         | 9                         | 8                         | 1.1        |
| rrnAC0166                          | proS      | Prolyl-tRNA synthetase                             | 19                        | 18                        | 1.1        | pNG7116                                        | nthC      | Endonuclease III                                          | 4                         | 4                         | 1.0        |
| rrnAC3169                          | argS      | Arginyl-tRNA synthetase                            | 25                        | 24                        | 1.0        | rrnAC2910                                      | radA      | DNA repair and recombination protein RadA                 | 25                        | 27                        | 0.9        |
| rrnAC0023                          | gatE      | Glutamyl-tRNA synthetase                           | 12                        | 12                        | 1.0        | rrnAC2851                                      | pcn       | DNA polymerase sliding clamp                              | 24                        | 33                        | 0.7        |
| rrnAC2965                          | trpS      | Tryptophanyl-tRNA synthetase                       | 11                        | 11                        | 1.0        | rrnAC1133                                      | rpaA      | Replication protein A                                     | 12                        | 17                        | 0.7        |
| rrnAC0085                          | gluX      | Glutamyl-tRNA synthetase                           | 10                        | 11                        | 0.9        | rrnAC2550                                      | mutL      | DNA mismatch repair protein mutL                          | 2                         | 3                         | 0.7        |
| rrnAC1356                          | gatC      | Glutamyl-tRNA synthetase                           | 9                         | 11                        | 0.8        | rrnAC                                          |           |                                                           |                           |                           |            |
