# Supplementary material
Source: PubMed Central journal article supplement (PMC3168985)
Supplement: NIHMS304204-supplement-12_si_012.pdf [file NIHMS304204-supplement-12_si_012.pdf]

**Supplementary Table 12.** Comparison of the number of peptides in tryptic digested soluble and membrane proteomes (OD<sub>600</sub> = 0.7 and 1.2) identified by MS/MS. Only the proteins with a *Protein/Peptide Prophet* probability  $\geq 0.9$  were tabulated. The numbers of transmembrane domains predicted by *TMHMM* program are shown in the last column.

| Multiple or single unique peptide identification | Protein information |                   |                 |                                                                                 | Number of peptides identified in membrane and soluble fractions at OD 0.7 and 1.2 |        |            |        |             |        |            |        | Estimation of expression level changes |                        |                    |            |                    | Membrane of soluble specificity |                        |                    |                     |                |       |
|--------------------------------------------------|---------------------|-------------------|-----------------|---------------------------------------------------------------------------------|-----------------------------------------------------------------------------------|--------|------------|--------|-------------|--------|------------|--------|----------------------------------------|------------------------|--------------------|------------|--------------------|---------------------------------|------------------------|--------------------|---------------------|----------------|-------|
|                                                  | Locus name          | Accession no.     | Gene name       | Protein description                                                             | OD 0.7 memb                                                                       |        | OD 0.7 sol |        | OD 1.2 memb |        | OD 1.2 sol |        | No. peptides in OD 0.7                 | No. peptides in OD 1.2 | Total no. peptides | OD 0.7/1.2 | Remark 1           | No. peptides (membrane)         | No. peptides (soluble) | % membrane / total | Remark 2            | Protein length | TMHMM |
|                                                  |                     |                   |                 |                                                                                 | total                                                                             | unique | total      | unique | total       | unique | total      | unique |                                        |                        |                    |            |                    |                                 |                        |                    |                     |                |       |
| $\geq 2$ unique peptides                         | pNG5138             | Q5V7F4_HALMA      | <i>csqI</i>     | Cell surface glycoprotein                                                       | 2282                                                                              | 85     | 33         | 14     | 1739        | 77     | 122        | 17     | 2315                                   | 1861                   | 4176               | 1.2        | No dramatic change | 4021                            | 155                    | 96.3               | Memb predominant    | 887            | 2     |
| $\geq 2$ unique peptides                         | rmAC1803            | Q5V1B0_HALMA      | <i>rmAC1803</i> | Hypothetical protein                                                            | 1294                                                                              | 62     | 15         | 7      | 1314        | 59     | 10         | 4      | 1309                                   | 1324                   | 2633               | 1.0        | No dramatic change | 2608                            | 25                     | 99.1               | Memb predominant    | 396            | 1     |
| $\geq 2$ unique peptides                         | rmAC3098            | Q5UY43_HALMA      | <i>rmAC3098</i> | Hypothetical protein                                                            | 1198                                                                              | 39     | 13         | 4      | 863         | 38     | 24         | 8      | 1211                                   | 887                    | 2098               | 1.4        | No dramatic change | 2061                            | 37                     | 98.2               | Memb predominant    | 357            | 1     |
| $\geq 2$ unique peptides                         | rmAC3099            | Q5UY42_HALMA      | <i>edp</i>      | Proteinase IV-like                                                              | 1061                                                                              | 48     | 1          | 1      | 791         | 39     | 1          | 1      | 1062                                   | 792                    | 1854               | 1.3        | No dramatic change | 1852                            | 2                      | 99.9               | Memb predominant    | 308            | 1     |
| $\geq 2$ unique peptides                         | rmAC3155            | Q5UXZ2_HALMA      | <i>atpC1</i>    | H+ ATP synthase subunit C (EC 3.6.3.14)                                         | 940                                                                               | 10     | 0          | 0      | 871         | 14     | 0          | 0      | 940                                    | 871                    | 1811               | 1.1        | No dramatic change | 1811                            | 0                      | 100.0              | Memb only           | 86             | 2     |
| $\geq 2$ unique peptides                         | rmAC2228            | Q5V092_HALMA      | <i>dppD</i>     | Dipeptide ABC transporter ATP-binding                                           | 551                                                                               | 26     | 0          | 0      | 392         | 21     | 0          | 0      | 551                                    | 392                    | 943                | 1.4        | No dramatic change | 943                             | 0                      | 100.0              | Memb only           | 575            | 0     |
| $\geq 2$ unique peptides                         | rmAC2149            | Q5V0G0_HALMA      | <i>yggG</i>     | Phosphate ABC transporter binding                                               | 79                                                                                | 14     | 0          | 0      | 723         | 23     | 3          | 2      | 79                                     | 726                    | 805                | 0.1        | 1.2 (>3X)          | 802                             | 3                      | 99.6               | Memb predominant    | 384            | 0     |
| $\geq 2$ unique peptides                         | rmAC3299            | Q5UXL1_HALMA      | <i>dppA</i>     | Dipeptide ABC transporter dipeptide-binding                                     | 437                                                                               | 21     | 0          | 0      | 354         | 21     | 1          | 1      | 437                                    | 355                    | 792                | 1.2        | No dramatic change | 791                             | 1                      | 99.9               | Memb predominant    | 621            | 0     |
| $\geq 2$ unique peptides                         | rmAC0510            | Q5V4M1_HALMA      | <i>hcp9</i>     | Halocyanin-like                                                                 | 260                                                                               | 14     | 0          | 0      | 492         | 17     | 2          | 2      | 260                                    | 494                    | 754                | 0.5        | No dramatic change | 752                             | 2                      | 99.7               | Memb predominant    | 297            | 0     |
| $\geq 2$ unique peptides                         | rmAC2706            | MDH_HALMARReview  | <i>mdh</i>      | Malate dehydrogenase (EC 1.1.1.37)                                              | 0                                                                                 | 0      | 267        | 30     | 3           | 2      | 216        | 27     | 267                                    | 219                    | 486                | 1.2        | No dramatic change | 3                               | 483                    | 0.6                | Soluble predominant | 304            | 0     |
| $\geq 2$ unique peptides                         | rmAC2158            | Q5V0F1_HALMA      | <i>acnB</i>     | Aconitate hydratase (EC 4.2.1.3)                                                | 42                                                                                | 15     | 205        | 29     | 46          | 16     | 182        | 29     | 247                                    | 228                    | 475                | 1.1        | No dramatic change | 88                              | 387                    | 18.5               | Soluble predominant | 677            | 0     |
| $\geq 2$ unique peptides                         | rmAC2571            | Q5UZD8_HALMA      | <i>rmAC2571</i> | Hypothetical protein                                                            | 6                                                                                 | 1      | 295        | 19     | 5           | 1      | 132        | 11     | 301                                    | 137                    | 438                | 2.2        | 0.7 (>3X)          | 11                              | 427                    | 2.5                | Soluble predominant | 55             | 0     |
| $\geq 2$ unique peptides                         | rmAC0831            | SODM_HALMARReview | <i>sod</i>      | Superoxide dismutase [Mn] (EC 1.15.1.1)                                         | 0                                                                                 | 0      | 164        | 17     | 4           | 3      | 254        | 16     | 164                                    | 258                    | 422                | 0.6        | No dramatic change | 4                               | 418                    | 0.9                | Soluble predominant | 203            | 0     |
| $\geq 2$ unique peptides                         | pNG7111             | Q5V6M9_HALMA      | <i>pNG7111</i>  | Hypothetical protein                                                            | 26                                                                                | 13     | 108        | 20     | 20          | 11     | 226        | 18     | 134                                    | 246                    | 380                | 0.5        | No dramatic change | 46                              | 334                    | 12.1               | Soluble predominant | 342            | 0     |
| $\geq 2$ unique peptides                         | rmAC3160            | Q5UXY7_HALMA      | <i>ntpB</i>     | V-type sodium ATP synthase subunit B (EC 3.6.3.14)                              | 49                                                                                | 13     | 131        | 26     | 69          | 16     | 114        | 23     | 180                                    | 183                    | 363                | 1.0        | No dramatic change | 118                             | 245                    | 32.5               | Memb + Sol          | 470            | 0     |
| $\geq 2$ unique peptides                         | rmAC2406            | EF1A_HALMARReview | <i>tuf</i>      | Elongation factor 1-alpha (EF-1-alpha) (Elongation factor Tu) (EF-Tu)           | 16                                                                                | 7      | 125        | 26     | 24          | 8      | 198        | 30     | 141                                    | 222                    | 363                | 0.6        | No dramatic change | 40                              | 323                    | 11.0               | Soluble predominant | 421            | 0     |
| $\geq 2$ unique peptides                         | rmAC0170            | Q5V5G6_HALMA      | <i>rmAC0170</i> | Hypothetical protein                                                            | 198                                                                               | 18     | 0          | 0      | 154         | 17     | 0          | 0      | 198                                    | 154                    | 352                | 1.3        | No dramatic change | 352                             | 0                      | 100.0              | Memb only           | 323            | 0     |
| $\geq 2$ unique peptides                         | rmB0319             | Q5UW70_HALMA      | <i>phnD1</i>    | ABC transporter phosphate-binding protein                                       | 250                                                                               | 27     | 0          | 0      | 73          | 15     | 0          | 0      | 250                                    | 73                     | 323                | 3.4        | 0.7 (>3X)          | 323                             | 0                      | 100.0              | Memb only           | 389            | 0     |
| $\geq 2$ unique peptides                         | rmAC1171            | CATA_HALMARReview | <i>perA</i>     | Peroxidase/catalase (EC 1.11.1.6) (Catalase-peroxidase)                         | 0                                                                                 | 0      | 161        | 46     | 3           | 3      | 152        | 42     | 161                                    | 155                    | 316                | 1.0        | No dramatic change | 3                               | 313                    | 0.9                | Soluble predominant | 731            | 0     |
| $\geq 2$ unique peptides                         | rmAC0472            | Q5V4Q4_HALMA      | <i>sucC</i>     | Succinyl-CoA synthetase beta chain (EC 6.2.1.5)                                 | 7                                                                                 | 2      | 130        | 27     | 11          | 4      | 166        | 25     | 137                                    | 177                    | 314                | 0.8        | No dramatic change | 18                              | 296                    | 5.7                | Soluble predominant | 382            | 0     |
| $\geq 2$ unique peptides                         | rmAC2526            | FER1_HALMARReview | <i>fer1</i>     | Ferredoxin-1                                                                    | 0                                                                                 | 0      | 174        | 2      | 0           | 0      | 132        | 5      | 174                                    | 132                    | 306                | 1.3        | No dramatic change | 0                               | 306                    | 0.0                | Soluble only        | 129            | 0     |
| $\geq 2$ unique peptides                         | rmAC1097            | Q5V345_HALMA      | <i>sdhA1</i>    | Succinate dehydrogenase flavoprotein subunit (EC 1.3.99.1)                      | 113                                                                               | 28     | 8          | 5      | 179         | 31     | 1          | 1      | 121                                    | 180                    | 301                | 0.7        | No dramatic change | 292                             | 9                      | 97.0               | Memb predominant    | 608            | 0     |
| $\geq 2$ unique peptides                         | rmAC2413            | EF2_HALMARReview  | <i>fusA</i>     | Elongation factor 2 (EF-2)                                                      | 3                                                                                 | 2      | 145        | 41     | 6           | 3      | 135        | 39     | 148                                    | 141                    | 289                | 1.0        | No dramatic change | 9                               | 280                    | 3.1                | Soluble predominant | 728            | 0     |
| $\geq 2$ unique peptides                         | rmB0311             | Q5UW77_HALMA      | <i>ugpB</i>     | Glycerol-3-phosphate-binding protein                                            | 22                                                                                | 7      | 0          | 0      | 258         | 18     | 3          | 3      | 22                                     | 261                    | 283                | 0.1        | 1.2 (>3X)          | 280                             | 3                      | 98.9               | Memb predominant    | 453            | 0     |
| $\geq 2$ unique peptides                         | rmAC1914            | Q5V116_HALMA      | <i>lon</i>      | ATP-dependent protease LA (EC 3.4.21.53)                                        | 173                                                                               | 39     | 1          | 1      | 105         | 28     | 0          | 0      | 174                                    | 105                    | 279                | 1.7        | No dramatic change | 278                             | 1                      | 99.6               | Memb predominant    | 709            | 1     |
| $\geq 2$ unique peptides                         | rmAC0792            | Q5V3X3_HALMA      | <i>cdc48B</i>   | Cell division control protein 48                                                | 1                                                                                 | 1      | 121        | 45     | 7           | 5      | 144        | 44     | 122                                    | 151                    | 273                | 0.8        | No dramatic change | 8                               | 265                    | 2.9                | Soluble predominant | 757            | 0     |
| $\geq 2$ unique peptides                         | rmAC1267            | Q5V2P4_HALMA      | <i>korA</i>     | 2-oxoglutarate ferredoxin oxidoreductase subunit alpha (EC 1.2.7.3)(EC 1.2.7.1) | 6                                                                                 | 4      | 120        | 23     | 13          | 8      | 124        | 26     | 126                                    | 137                    | 263                | 0.9        | No dramatic change | 19                              | 244                    | 7.2                | Soluble predominant | 632            | 0     |
| $\geq 2$ unique peptides                         | rmAC1083            | Q5V357_HALMA      | <i>hbd1</i>     | 3-hydroxyacyl-CoA dehydrogenase (EC 1.1.1.35) (EC 4.2.1.17)                     | 1                                                                                 | 1      | 121        | 28     | 5           | 4      | 131        | 32     | 122                                    | 136                    | 258                | 0.9        | No dramatic change | 6                               | 252                    | 2.3                | Soluble predominant | 669            | 0     |
| $\geq 2$ unique peptides                         | rmAC2656            | Q5UZ68_HALMA      | <i>yufN</i>     | ABC transporter                                                                 | 125                                                                               | 10     | 0          | 0      | 127         | 9      | 0          | 0      | 125                                    | 127                    | 252                | 1.0        | No dramatic change | 252                             | 0                      | 100.0              | Memb only           | 393            | 0     |
| $\geq 2$ unique peptides                         | rmAC0080            | Q5V5P3_HALMA      | <i>rmAC0080</i> | Predicted hydrolase                                                             | 35                                                                                | 18     | 103        | 29     | 28          | 15     | 81         | 29     | 138                                    | 109                    | 247                | 1.3        | No dramatic change | 63                              | 184                    | 25.5               | Memb + Sol          | 460            | 0     |
| $\geq 2$ unique peptides                         | rmAC2605            | Q5UZA8_HALMA      | <i>hdrD</i>     | Heterodisulfide reductase                                                       | 130                                                                               | 20     | 0          | 0      | 111         | 21     | 0          | 0      | 130                                    | 111                    | 241                | 1.2        | No dramatic change | 241                             | 0                      | 100.0              | Memb only           | 693            | 4     |
| $\geq 2$ unique peptides                         | rmAC3026            | Q5UYA2_HALMA      | <i>yfmJ1</i>    | Quinone oxidoreductase (EC 1.6.5.5)                                             | 30                                                                                | 9      | 97         | 19     | 15          | 9      | 95         | 21     | 127                                    | 110                    | 237                | 1.2        | No dramatic change | 45                              | 192                    | 19.0               | Soluble predominant | 348            | 0     |
| $\geq 2$ unique peptides                         | rmAC2473            | Q5UZM4_HALMA      | <i>aldY2</i>    | Aldehyde dehydrogenase (EC 1.2.1.3)                                             | 2                                                                                 | 2      | 81         | 17     | 15          | 5      | 125        | 19     | 83                                     | 140                    | 223                | 0.6        | No dramatic change | 17                              | 206                    | 7.6                | Soluble predominant | 522            | 0     |
| $\geq 2$ unique peptides                         | rmAC2891            | Q5UYL7_HALMA      | <i>cctA2</i>    | Thermosome alpha subunit                                                        | 4                                                                                 | 3      | 87         | 25     | 13          | 8      | 117        | 24     | 91                                     | 130                    | 221                | 0.7        | No dramatic change | 17                              | 204                    | 7.7                | Soluble predominant | 590            | 0     |
| $\geq 2$ unique peptides                         | rmAC1525            | Q5V207_HALMA      | <i>rmAC1525</i> | Hypothetical protein                                                            | 20                                                                                | 12     | 98         | 29     | 19          | 12     | 71         | 21     | 118                                    | 90                     | 208                | 1.3        | No dramatic change | 39                              | 169                    | 18.8               | Soluble predominant | 380            | 0     |
| $\geq 2$ unique peptides                         | rmAC1622            | Q5V1R5_HALMA      | <i>nrhA</i>     | Ribonucleoside-diphosphate reductase alpha chain (EC 1.17.4.1)                  | 2                                                                                 | 2      | 106        | 34     | 3           | 2      | 88         | 28     | 108                                    | 91                     | 199                | 1.2        | No dramatic change | 5                               | 194                    | 2.5                | Soluble predominant | 1032           | 0     |
| $\geq 2$ unique peptides                         | rmAC1782            | THI4_HALMARReview | <i>rmAC1782</i> | Putative thiazole biosynthetic enzyme                                           | 10                                                                                | 7      | 64         | 10     | 17          | 9      | 107        | 20     | 74                                     | 124                    | 198                | 0.6        | No dramatic change | 27                              | 171                    | 13.6               | Soluble predominant | 310            | 0     |
| $\geq 2$ unique peptides                         | rmAC3228            | Q5UXS3_HALMA      | <i>acs5</i>     | Putative acetyl-coenzyme A synthetase (EC 6.2.1.1)                              | 0                                                                                 | 0      | 64         | 18     | 5           | 3      | 129        | 30     | 64                                     | 134                    | 198                | 0.5        | 1.2 (2-3X)         | 5                               | 193                    | 2.5                | Soluble predominant | 664            | 0     |
| $\geq 2$ unique peptides                         | rmAC1449            | Q5V277_HALMA      | <i>ndHG5</i>    | NADH dehydrogenase/oxidoreductase                                               | 88                                                                                | 28     | 2          | 2      | 101         | 27     | 3          | 2      | 90                                     | 104                    | 194                | 0.9        | No dramatic change | 189                             | 5                      | 97.4               | Memb predominant    | 560            | 0     |
| $\geq 2$ unique peptides                         | rmB0265             | Q5UWB7_HALMA      | <i>acs4</i>     | Acyl-coenzyme A synthetases (EC 6.2.1.1)                                        | 4                                                                                 | 4      | 102        | 25     | 4           | 3      | 83         | 26     | 106                                    | 87                     | 193                | 1.2        | No dramatic change | 8                               | 185                    | 4.1                | Soluble predominant | 616            | 0     |
| $\geq 2$ unique peptides                         | rmAC3419            | Q5UXA4_HALMA      | <i>icd</i>      | Isocitrate dehydrogenase (EC 1.1.1.42)                                          | 3                                                                                 | 3      | 93         | 23     | 8           | 6      | 82         | 23     | 96                                     | 90                     | 186                | 1.1        | No dramatic change | 11                              | 175                    | 5.9                | Soluble predominant | 420            | 0     |
| $\geq 2$ unique peptides                         | rmAC0028            | Q5V5U1_HALMA      | <i>fumC</i>     | Fumarate hydratase class-II (EC 4.2.1.2)                                        | 4                                                                                 | 2      | 97         | 26     | 4           | 2      | 80         | 19     | 101                                    | 84                     | 185                | 1.2        | No dramatic change | 8                               | 177                    | 4.3                | Soluble predominant | 468            | 0     |
| $\geq 2$ unique peptides                         | rmAC2780            | Q5UYW5_HALMA      | <i>glnA</i>     | Glutamine synthetase (EC 6.3.1.2)                                               | 5                                                                                 | 4      | 94         | 23     | 13          | 7      | 70         | 21     | 99                                     | 83                     | 182                | 1.2        | No dramatic change | 18                              | 164                    | 9.9                | Soluble predominant | 480            | 0     |
| $\geq 2$ unique peptides                         | rmAC2939            | Q5UYH9_HALMA      | <i>cctB</i>     | Thermosome beta subunit                                                         | 4                                                                                 | 2      | 93         | 23     | 7           | 5      | 77         | 21     | 97                                     | 84                     | 181                | 1.2        | No dramatic change | 11                              | 170                    | 6.1                | Soluble predominant | 559            | 0     |
| $\geq 2$ unique peptides                         | pNG4049             | Q5V7X3_HALMA      | <i>cas3</i>     | CRISPR-associated protein                                                       | 10                                                                                | 6      | 90         | 23     | 4           | 1      | 73         | 23     | 100                                    | 77                     | 177                | 1.3        | No dramatic change | 14                              | 163                    | 7.9                | Soluble predominant | 357            | 0     |
| $\geq 2$ unique peptides                         | rmAC0345            | Q5V510_HALMA      | <i>fbpA</i>     | Fructose-bisphosphate aldolase (EC 4.1.2.13)                                    | 38                                                                                | 13     | 50         | 16     | 33          | 12     | 56         | 12     | 88                                     | 89                     | 177                | 1.0        | No dramatic change | 71                              | 106                    | 40.1               | Memb + Sol          | 260            | 0     |
| $\geq 2$ unique peptides                         | rmAC1787            | Q5V1C3_HALMA      | <i>hutU</i>     | Urocanate hydratase (EC 4.2.1.49)                                               | 3                                                                                 | 3      | 54         | 16     | 10          | 8      | 105        | 28     | 57                                     | 115                    | 172                | 0.5        | 1.2 (2-3X)         | 13                              | 159                    | 7.6                | Soluble predominant | 582            | 0     |
| $\geq 2$ unique peptides                         | rmAC2115            | Q5V0I7_HALMA      | <i>rmAC2115</i> | Hypothetical protein                                                            | 64                                                                                | 10     | 0          | 0      | 96          | 13     | 0          | 0      | 64                                     | 96                     | 160                | 0.7        | No dramatic change | 160                             | 0                      | 100.0              | Memb only           | 197            | 0     |
| $\geq 2$ unique peptides                         | rmAC1093            | Q5V347_HALMA      | <i>sdhB</i>     | Succinate dehydrogenase iron-sulfur protein subunit (EC 1.3.99.1)               | 71                                                                                | 17     | 1          | 1      | 82          | 16     | 1          | 1      | 72                                     | 83                     | 155                | 0.9        | No dramatic change | 153                             | 2                      | 98.7               | Memb predominant    | 295            | 0     |
| $\geq 2$ unique peptides                         | rmAC0718            | Q5V441_HALMA      | <i>porA</i>     | Pyruvate ferredoxin oxidore                                                     |                                                                                   |        |            |        |             |        |            |        |                                        |                        |                    |            |                    |                                 |                        |                    |                     |                |       |

|                     |          |                   |                  |                                                                                             |    |    |     |    |    |    |    |    |     |     |     |     |                    |     |     |       |                     |      |    |
|---------------------|----------|-------------------|------------------|---------------------------------------------------------------------------------------------|----|----|-----|----|----|----|----|----|-----|-----|-----|-----|--------------------|-----|-----|-------|---------------------|------|----|
| ≥ 2 unique peptides | rmAC3019 | Q5UYA9_HALMA      | <i>cobN</i>      | Cobalamin biosynthesis protein                                                              | 0  | 0  | 111 | 39 | 0  | 0  | 40 | 21 | 111 | 40  | 151 | 2.8 | 0.7 (2-3X)         | 0   | 151 | 0.0   | Soluble only        | 1312 | 0  |
| ≥ 2 unique peptides | pNG7157  | Q5V617_HALMA      | <i>gudB</i>      | NAD(P)-specific glutamate dehydrogenase (EC 1.4.1.3)                                        | 11 | 4  | 65  | 18 | 8  | 3  | 67 | 16 | 76  | 75  | 151 | 1.0 | No dramatic change | 19  | 132 | 12.6  | Soluble predominant | 431  | 0  |
| ≥ 2 unique peptides | rmAC1154 | Q5V2Z7_HALMA      | <i>coxA3</i>     | Cytochrome c oxidase polypeptide I (EC 1.9.3.1)                                             | 74 | 8  | 0   | 0  | 76 | 10 | 0  | 0  | 74  | 76  | 150 | 1.0 | No dramatic change | 150 | 0   | 100.0 | Memb only           | 562  | 13 |
| ≥ 2 unique peptides | rmAC0770 | Q5V3Z3_HALMA      | <i>acdB</i>      | Acyl-coA dehydrogenase (EC 1.3.99.-)                                                        | 2  | 2  | 72  | 19 | 6  | 3  | 70 | 17 | 74  | 76  | 150 | 1.0 | No dramatic change | 8   | 142 | 5.3   | Soluble predominant | 382  | 0  |
| ≥ 2 unique peptides | rmAC1611 | RL3_HALMARReview  | <i>rpl3p</i>     | 50S ribosomal protein L3P (Hmal3) (H11)                                                     | 91 | 19 | 0   | 0  | 57 | 14 | 0  | 0  | 91  | 57  | 148 | 1.6 | No dramatic change | 148 | 0   | 100.0 | Memb only           | 338  | 0  |
| ≥ 2 unique peptides | rmAC3147 | Q5UXZ9_HALMA      | <i>etfA2</i>     | Electron transfer flavoprotein alpha-subunit                                                | 4  | 2  | 56  | 10 | 3  | 2  | 83 | 11 | 60  | 86  | 146 | 0.7 | No dramatic change | 7   | 139 | 4.8   | Soluble predominant | 316  | 0  |
| ≥ 2 unique peptides | rmAC0382 | Q5V4X8_HALMA      | <i>gabT</i>      | 4-aminobutyrate aminotransferase                                                            | 3  | 2  | 63  | 19 | 5  | 4  | 74 | 20 | 66  | 79  | 145 | 0.8 | No dramatic change | 8   | 137 | 5.5   | Soluble predominant | 440  | 0  |
| ≥ 2 unique peptides | pNG7145  | Q5V6J8_HALMA      | <i>nosL</i>      | NosL protein                                                                                | 55 | 7  | 0   | 0  | 86 | 8  | 0  | 0  | 55  | 86  | 141 | 0.6 | No dramatic change | 141 | 0   | 100.0 | Memb only           | 200  | 0  |
| ≥ 2 unique peptides | rmAC3159 | Q5UXY8_HALMA      | <i>ntpA</i>      | V-type sodium ATP synthase subunit A (EC 3.6.3.14)                                          | 9  | 6  | 56  | 16 | 17 | 9  | 56 | 19 | 65  | 73  | 138 | 0.9 | No dramatic change | 26  | 112 | 18.8  | Soluble predominant | 586  | 0  |
| ≥ 2 unique peptides | rmAC1268 | Q5V2P3_HALMA      | <i>korB</i>      | Putative 2-ketoglutarate ferredoxin oxidoreductase (Beta) (EC 1.2.7.3)(EC 1.2.7.1)          | 2  | 1  | 61  | 15 | 5  | 2  | 70 | 17 | 63  | 75  | 138 | 0.8 | No dramatic change | 7   | 131 | 5.1   | Soluble predominant | 312  | 0  |
| ≥ 2 unique peptides | pNG7361  | Q5V5Z8_HALMA      | <i>gcvT5</i>     | Probable aminomethyltransferase (EC 2.1.2.10)                                               | 0  | 0  | 32  | 13 | 5  | 3  | 99 | 24 | 32  | 104 | 136 | 0.3 | 1.2 (>3X)          | 5   | 131 | 3.7   | Soluble predominant | 458  | 0  |
| ≥ 2 unique peptides | rmAC0923 | Q5V3K5_HALMA      | <i>rbsB-2</i>    | Sugar ABC transporter substrate binding protein                                             | 76 | 14 | 0   | 0  | 60 | 14 | 0  | 0  | 76  | 60  | 136 | 1.3 | No dramatic change | 136 | 0   | 100.0 | Memb only           | 509  | 1  |
| ≥ 2 unique peptides | rmAC3012 | Q5UYB5_HALMA      | <i>rrmAC3012</i> | Hypothetical protein                                                                        | 2  | 2  | 67  | 6  | 6  | 3  | 58 | 6  | 69  | 64  | 133 | 1.1 | No dramatic change | 8   | 125 | 6.0   | Soluble predominant | 123  | 0  |
| ≥ 2 unique peptides | rmAC1443 | Q5V283_HALMA      | <i>rrmAC1443</i> | Hypothetical protein                                                                        | 61 | 16 | 5   | 2  | 66 | 19 | 1  | 1  | 66  | 67  | 133 | 1.0 | No dramatic change | 127 | 6   | 95.5  | Memb predominant    | 465  | 0  |
| ≥ 2 unique peptides | rmAC2227 | Q5V093_HALMA      | <i>dppF</i>      | Dipeptide ABC transporter ATP-binding                                                       | 64 | 28 | 4   | 3  | 65 | 26 | 0  | 0  | 68  | 65  | 133 | 1.0 | No dramatic change | 129 | 4   | 97.0  | Memb predominant    | 890  | 0  |
| ≥ 2 unique peptides | rmAC0201 | Q5V5E0_HALMA      | <i>aldY2</i>     | Aldehyde dehydrogenase (EC 1.2.1.3)                                                         | 4  | 1  | 35  | 11 | 8  | 4  | 86 | 20 | 39  | 94  | 133 | 0.4 | 1.2 (2-3X)         | 12  | 121 | 9.0   | Soluble predominant | 508  | 0  |
| ≥ 2 unique peptides | rmAC0732 | Q5V427_HALMA      | <i>petB1</i>     | Cytochrome b6                                                                               | 58 | 5  | 0   | 0  | 74 | 5  | 0  | 0  | 58  | 74  | 132 | 0.8 | No dramatic change | 132 | 0   | 100.0 | Memb only           | 267  | 5  |
| ≥ 2 unique peptides | rmAC0474 | Q5V4Q3_HALMA      | <i>sucD</i>      | Succinyl-CoA synthetase alpha chain (EC 6.2.1.5)                                            | 3  | 1  | 59  | 12 | 10 | 4  | 59 | 12 | 62  | 69  | 131 | 0.9 | No dramatic change | 13  | 118 | 9.9   | Soluble predominant | 290  | 0  |
| ≥ 2 unique peptides | rmAC0979 | Q5V3F5_HALMA      | <i>rrmAC0979</i> | Putative nuclease                                                                           | 0  | 0  | 63  | 22 | 1  | 1  | 65 | 25 | 63  | 66  | 129 | 1.0 | No dramatic change | 1   | 128 | 0.8   | Soluble predominant | 726  | 0  |
| ≥ 2 unique peptides | rmAC0158 | Q5V5H6_HALMA      | <i>rrmAC0158</i> | Hypothetical protein                                                                        | 75 | 9  | 0   | 0  | 54 | 10 | 0  | 0  | 75  | 54  | 129 | 1.4 | No dramatic change | 129 | 0   | 100.0 | Memb only           | 359  | 1  |
| ≥ 2 unique peptides | rmAC3339 | DNAK_HALMARReview | <i>dnaK</i>      | Chaperone protein dnaK (Heat shock protein 70) (Heat shock 70 kDaprotein) (HSP70)           | 8  | 4  | 49  | 16 | 21 | 10 | 50 | 18 | 57  | 71  | 128 | 0.8 | No dramatic change | 29  | 99  | 22.7  | Soluble predominant | 635  | 0  |
| ≥ 2 unique peptides | rmAC2956 | Q5UYG3_HALMA      | <i>pdhB1</i>     | Pyruvate dehydrogenase (EC 1.2.4.1)                                                         | 8  | 4  | 51  | 13 | 12 | 5  | 57 | 15 | 59  | 69  | 128 | 0.9 | No dramatic change | 20  | 108 | 15.6  | Soluble predominant | 332  | 0  |
| ≥ 2 unique peptides | rmAC0384 | Q5V4X6_HALMA      | <i>gdhA1</i>     | NAD(P)-specific glutamate dehydrogenase (EC 1.4.1.3)                                        | 18 | 8  | 58  | 22 | 7  | 6  | 44 | 15 | 76  | 51  | 127 | 1.5 | No dramatic change | 25  | 102 | 19.7  | Soluble predominant | 427  | 0  |
| ≥ 2 unique peptides | rmAC0759 | Q5V402_HALMA      | <i>cat</i>       | Cationic amino acid transporter                                                             | 68 | 22 | 0   | 0  | 59 | 20 | 0  | 0  | 68  | 59  | 127 | 1.2 | No dramatic change | 127 | 0   | 100.0 | Memb only           | 754  | 12 |
| ≥ 2 unique peptides | rmAC0852 | Q5V3R9_HALMA      | <i>rrmAC0852</i> | Hypothetical protein                                                                        | 63 | 18 | 0   | 0  | 63 | 15 | 0  | 0  | 63  | 63  | 126 | 1.0 | No dramatic change | 126 | 0   | 100.0 | Memb only           | 321  | 1  |
| ≥ 2 unique peptides | rmAC1570 | Q5V1W4_HALMA      | <i>trp-7</i>     | ABC transporter ATP-binding protein                                                         | 77 | 15 | 0   | 0  | 46 | 13 | 0  | 0  | 77  | 46  | 123 | 1.7 | No dramatic change | 123 | 0   | 100.0 | Memb only           | 601  | 4  |
| ≥ 2 unique peptides | rmAC0734 | Q5V425_HALMA      | <i>rrmAC0734</i> | Hypothetical protein                                                                        | 58 | 14 | 0   | 0  | 64 | 16 | 0  | 0  | 58  | 64  | 122 | 0.9 | No dramatic change | 122 | 0   | 100.0 | Memb only           | 139  | 2  |
| ≥ 2 unique peptides | rmAC0653 | Q5V495_HALMA      | <i>cysH</i>      | Phospho-adenyl-sulfate Reductase (EC 1.8.4.8)                                               | 7  | 2  | 56  | 14 | 10 | 6  | 49 | 13 | 63  | 59  | 122 | 1.1 | No dramatic change | 17  | 105 | 13.9  | Soluble predominant | 325  | 0  |
| ≥ 2 unique peptides | rmAC0451 | Q5V4S0_HALMA      | <i>rrmAC0451</i> | Hypothetical protein                                                                        | 1  | 1  | 62  | 16 | 6  | 2  | 52 | 13 | 63  | 58  | 121 | 1.1 | No dramatic change | 7   | 114 | 5.8   | Soluble predominant | 177  | 0  |
| ≥ 2 unique peptides | rmAC1464 | Q5V263_HALMA      | <i>rrmAC1464</i> | Hypothetical protein                                                                        | 1  | 1  | 60  | 16 | 0  | 0  | 59 | 16 | 61  | 59  | 120 | 1.0 | No dramatic change | 1   | 119 | 0.8   | Soluble predominant | 278  | 0  |
| ≥ 2 unique peptides | rmAC1429 | RS3A_HALMARReview | <i>rps3Ae</i>    | 30S ribosomal protein S3Ae                                                                  | 33 | 16 | 47  | 14 | 19 | 9  | 20 | 8  | 80  | 39  | 119 | 2.1 | 0.7 (2-3X)         | 52  | 67  | 43.7  | Memb + Sol          | 213  | 0  |
| ≥ 2 unique peptides | pNG5070  | Q5V7M2_HALMA      | <i>pNG5070</i>   | Hypothetical protein                                                                        | 59 | 17 | 0   | 0  | 57 | 17 | 0  | 0  | 59  | 57  | 116 | 1.0 | No dramatic change | 116 | 0   | 100.0 | Memb only           | 549  | 1  |
| ≥ 2 unique peptides | rmAC0775 | Q5V3Y8_HALMA      | <i>gdhA2</i>     | NAD(P)-specific glutamate dehydrogenase (EC 1.4.1.3)                                        | 0  | 0  | 52  | 17 | 1  | 1  | 63 | 22 | 52  | 64  | 116 | 0.8 | No dramatic change | 1   | 115 | 0.9   | Soluble predominant | 418  | 0  |
| ≥ 2 unique peptides | rmAC1153 | Q5V2Z8_HALMA      | <i>coxB2</i>     | Cytochrome c oxidase subunit II (EC 1.9.3.1)                                                | 35 | 3  | 0   | 0  | 79 | 5  | 0  | 0  | 35  | 79  | 114 | 0.4 | 1.2 (2-3X)         | 114 | 0   | 100.0 | Memb only           | 190  | 1  |
| ≥ 2 unique peptides | rmAC2667 | Q5UZS8_HALMA      | <i>thrC3</i>     | Threonine synthase                                                                          | 74 | 19 | 1   | 1  | 32 | 10 | 6  | 4  | 75  | 38  | 113 | 2.0 | No dramatic change | 106 | 7   | 93.8  | Memb predominant    | 463  | 0  |
| ≥ 2 unique peptides | rmAC1965 | Q5V0X0_HALMA      | <i>aceB</i>      | Malate synthase                                                                             | 0  | 0  | 50  | 14 | 0  | 0  | 63 | 15 | 50  | 63  | 113 | 0.8 | No dramatic change | 0   | 113 | 0.0   | Soluble only        | 435  | 0  |
| ≥ 2 unique peptides | rmAC1589 | SECY_HALMARReview | <i>secY</i>      | Preprotein translocase subunit secY (Protein transport protein SEC61 subunit alpha homolog) | 62 | 11 | 0   | 0  | 51 | 8  | 0  | 0  | 62  | 51  | 113 | 1.2 | No dramatic change | 113 | 0   | 100.0 | Memb only           | 487  | 9  |
| ≥ 2 unique peptides | rmAC2428 | Q5UZR4_HALMA      | <i>rpoA</i>      | DNA-directed RNA polymerase (EC 2.7.7.6)                                                    | 28 | 12 | 42  | 19 | 7  | 4  | 34 | 18 | 70  | 41  | 111 | 1.7 | No dramatic change | 35  | 76  | 31.5  | Memb + Sol          | 969  | 0  |
| ≥ 2 unique peptides | rmAC3156 | Q5UXZ1_HALMA      | <i>atpE</i>      | V-type ATP synthase subunit E (EC 3.6.3.14)                                                 | 18 | 6  | 47  | 12 | 21 | 5  | 25 | 9  | 65  | 46  | 111 | 1.4 | No dramatic change | 39  | 72  | 35.1  | Memb + Sol          | 194  | 0  |
| ≥ 2 unique peptides | rmAC3325 | Q5UXI8_HALMA      | <i>rrmAC3325</i> | Sulfatase arylsulfatase A-like (EC 3.1.6.-)                                                 | 6  | 3  | 44  | 15 | 14 | 8  | 47 | 18 | 50  | 61  | 111 | 0.8 | No dramatic change | 20  | 91  | 18.0  | Soluble predominant | 447  | 0  |
| ≥ 2 unique peptides | rmAC1815 | Q5V199_HALMA      | <i>cctA3</i>     | Thermosome alpha subunit                                                                    | 5  | 4  | 38  | 14 | 8  | 5  | 59 | 17 | 43  | 67  | 110 | 0.6 | No dramatic change | 13  | 97  | 11.8  | Soluble predominant | 526  | 0  |
| ≥ 2 unique peptides | rmAC1754 | Q5V1F0_HALMA      | <i>maeB</i>      | NAD-dependent malate dehydrogenase (EC 1.1.1.40)                                            | 0  | 0  | 53  | 20 | 3  | 2  | 53 | 22 | 53  | 56  | 109 | 0.9 | No dramatic change | 3   | 106 | 2.8   | Soluble predominant | 750  | 0  |
| ≥ 2 unique peptides | rmB0246  | Q5UWD2_HALMA      | <i>aldY5</i>     | Aldehyde dehydrogenase (EC 1.2.1.3)                                                         | 0  | 0  | 47  | 15 | 1  | 1  | 61 | 17 | 47  | 62  | 109 | 0.8 | No dramatic change | 1   | 108 | 0.9   | Soluble predominant | 483  | 0  |
| ≥ 2 unique peptides | rmAC1972 | Q5V0W4_HALMA      | <i>gcdH</i>      | Glutaryl-CoA dehydrogenase (EC 1.3.99.7)                                                    | 0  | 0  | 46  | 12 | 3  | 3  | 60 | 15 | 46  | 63  | 109 | 0.7 | No dramatic change | 3   | 106 | 2.8   | Soluble predominant | 387  | 0  |
| ≥ 2 unique peptides | rmAC2815 | Q5UYT2_HALMA      | <i>aca2</i>      | Acetyl-coA acetyltransferase (EC 2.3.1.9)                                                   | 0  | 0  | 57  | 17 | 2  | 2  | 49 | 14 | 57  | 51  | 108 | 1.1 | No dramatic change | 2   | 106 | 1.9   | Soluble predominant | 377  | 0  |
| ≥ 2 unique peptides | rmAC0232 | Q5V5B1_HALMA      | <i>rrmAC0232</i> | Hypothetical protein                                                                        | 5  | 4  | 28  | 7  | 17 | 7  | 57 | 15 | 33  | 74  | 107 | 0.4 | 1.2 (2-3X)         | 22  | 85  | 20.6  | Soluble predominant | 347  | 0  |
| ≥ 2 unique peptides | rmAC3157 | Q5UXZ0_HALMA      | <i>ntpC</i>      | V-type ATP synthase subunit C (EC 3.6.3.14)                                                 | 34 | 14 | 16  | 8  | 44 | 15 | 13 | 7  | 50  | 57  | 107 | 0.9 | No dramatic change | 78  | 29  | 72.9  | Memb + Sol          | 357  | 0  |
| ≥ 2 unique peptides | rmAC1455 | Q5V271_HALMA      | <i>nuoL2</i>     | NADH dehydrogenase 1 L subunit                                                              | 44 | 6  | 0   | 0  | 63 | 6  | 0  | 0  | 44  | 63  | 107 | 0.7 | No dramatic change | 107 | 0   | 100.0 | Memb only           | 697  | 16 |
| ≥ 2 unique peptides | rmAC3215 | Q5UXT5_HALMA      | <i>secD</i>      | Protein-export membrane protein SecD                                                        | 59 | 15 | 0   | 0  | 47 | 13 | 0  | 0  | 59  | 47  | 106 | 1.3 | No dramatic change | 106 | 0   | 100.0 | Memb only           | 518  | 6  |
| ≥ 2 unique peptides | rmAC2457 | Q5UZN9_HALMA      | <i>rrmAC2457</i> | Hypothetical protein                                                                        | 52 | 7  | 0   | 0  | 52 | 8  | 0  | 0  | 52  | 52  | 104 | 1.0 | No dramatic change | 104 | 0   | 100.0 | Memb only           | 255  | 6  |
| ≥ 2 unique peptides | rmAC1795 | Q5V1B6_HALMA      | <i>ppsA</i>      | Phosphoenolpyruvate synthase (EC 2.7.9.2)                                                   | 6  | 3  | 48  | 16 | 8  | 3  | 42 | 20 | 54  | 50  | 104 | 1.1 | No dramatic change | 14  | 90  | 13.5  | Soluble predominant | 786  | 0  |
| ≥ 2 unique peptides | rmAC3306 | Q5UXK6_HALMA      | <i>trpD1</i>     | Anthranilate phosphoribosyltransferase (EC 2.4.2.18)                                        | 0  | 0  | 51  | 14 | 1  | 1  | 52 | 14 | 51  | 53  | 104 | 1.0 | No dramatic change | 1   | 103 | 1.0   | Soluble predominant | 361  | 0  |
| ≥ 2 unique peptides | rmAC3297 | Q5UXL3_HALMA      | <i>oppC</i>      | Oligopeptide ABC transporter permease protein                                               | 65 | 11 | 0   | 0  | 39 | 8  | 0  | 0  | 65  | 39  | 104 | 1.7 | No dramatic change | 104 | 0   | 100.0 | Memb only           | 486  | 8  |
| ≥ 2 unique peptides | rmAC0002 | Q5V5W4_HALMA      | <i>accC2</i>     | Carbamoyl phosphate synthase I chain (EC 6.3.4.16)                                          | 2  | 2  | 45  | 17 | 4  | 3  | 52 | 22 | 47  | 56  | 103 | 0.8 | No dramatic change | 6   | 97  |       |                     |      |    |

|                     |          |                    |                  |                                                                                             |    |    |    |    |    |    |    |    |    |    |     |     |                    |     |    |       |                     |     |    |
|---------------------|----------|--------------------|------------------|---------------------------------------------------------------------------------------------|----|----|----|----|----|----|----|----|----|----|-----|-----|--------------------|-----|----|-------|---------------------|-----|----|
| ≥ 2 unique peptides | rmAC1830 | Q5V185_HALMA       | <i>zurF</i>      | ABC transporter ATP-binding protein                                                         | 0  | 0  | 50 | 18 | 2  | 1  | 49 | 18 | 50 | 51 | 101 | 1.0 | No dramatic change | 2   | 99 | 2.0   | Soluble predominant | 309 | 0  |
| ≥ 2 unique peptides | rmAC1230 | Q5V288_HALMA       | <i>styD</i>      | Peptidyl-prolyl cis-trans isomerase (EC 5.2.1.8)                                            | 1  | 1  | 42 | 12 | 1  | 1  | 56 | 13 | 43 | 57 | 100 | 0.8 | No dramatic change | 2   | 98 | 2.0   | Soluble predominant | 314 | 0  |
| ≥ 2 unique peptides | rmAC0371 | Q5V4Y8_HALMA       | <i>htr</i>       | MCP domain signal transducer                                                                | 49 | 19 | 0  | 0  | 51 | 20 | 0  | 0  | 49 | 51 | 100 | 1.0 | No dramatic change | 100 | 0  | 100.0 | Memb only           | 640 | 2  |
| ≥ 2 unique peptides | rmAC2511 | Q5UZI9_HALMA       | <i>citZ</i>      | Citrate synthase II (EC 2.3.3.1)                                                            | 2  | 2  | 49 | 13 | 2  | 1  | 45 | 13 | 51 | 47 | 98  | 1.1 | No dramatic change | 4   | 94 | 4.1   | Soluble predominant | 381 | 0  |
| ≥ 2 unique peptides | rmAC3154 | Q5UXZ3_HALMA       | <i>atpI</i>      | V-type ATP synthase subunit I (EC 3.6.3.14)                                                 | 48 | 14 | 0  | 0  | 50 | 14 | 0  | 0  | 48 | 50 | 98  | 1.0 | No dramatic change | 98  | 0  | 100.0 | Memb only           | 623 | 7  |
| ≥ 2 unique peptides | rmAC1283 | PURA_HALMARReview  | <i>purA</i>      | Adenylosuccinate synthetase (EC 6.3.4.4) (IMP-aspartate ligase)(AdSS) (AMPSase)             | 1  | 1  | 47 | 18 | 0  | 0  | 50 | 14 | 48 | 50 | 98  | 1.0 | No dramatic change | 1   | 97 | 1.0   | Soluble predominant | 458 | 0  |
| ≥ 2 unique peptides | rmAC1592 | RSS_HALMARReview   | <i>rps5p</i>     | 30S ribosomal protein SSP (HmaS5)                                                           | 11 | 6  | 52 | 15 | 5  | 4  | 30 | 11 | 63 | 35 | 98  | 1.8 | No dramatic change | 16  | 82 | 16.3  | Soluble predominant | 212 | 0  |
| ≥ 2 unique peptides | rmAC2429 | Q5UZR3_HALMA       | <i>rpoB</i>      | DNA-directed RNA polymerase beta subunit (EC 2.7.7.6)                                       | 2  | 2  | 54 | 26 | 1  | 1  | 39 | 22 | 56 | 40 | 96  | 1.4 | No dramatic change | 3   | 93 | 3.1   | Soluble predominant | 608 | 0  |
| ≥ 2 unique peptides | rmAC0562 | Q5V4H5_HALMA       | <i>pepC</i>      | Phosphoenolpyruvate carboxylase (EC 4.1.1.31)                                               | 2  | 2  | 50 | 17 | 1  | 1  | 43 | 24 | 52 | 44 | 96  | 1.2 | No dramatic change | 3   | 93 | 3.1   | Soluble predominant | 898 | 0  |
| ≥ 2 unique peptides | rmAC1507 | Q5V224_HALMA       | <i>pstA2</i>     | Phosphate ABC transporter permease protein                                                  | 59 | 5  | 0  | 0  | 37 | 6  | 0  | 0  | 59 | 37 | 96  | 1.6 | No dramatic change | 96  | 0  | 100.0 | Memb only           | 566 | 14 |
| ≥ 2 unique peptides | rmAC1259 | Q5V2Q1_HALMA       | <i>alkK2</i>     | Medium-chain-fatty-acid-CoA ligase                                                          | 0  | 0  | 45 | 16 | 1  | 1  | 49 | 20 | 45 | 50 | 95  | 0.9 | No dramatic change | 1   | 94 | 1.1   | Soluble predominant | 550 | 0  |
| ≥ 2 unique peptides | rmAC1657 | SYD_HALMARReview   | <i>aspS</i>      | Aspartyl-tRNA synthetase (EC 6.1.1.12) (Aspartate-tRNA ligase)(AspRS)                       | 1  | 1  | 39 | 14 | 1  | 1  | 51 | 21 | 40 | 52 | 92  | 0.8 | No dramatic change | 2   | 90 | 2.2   | Soluble predominant | 434 | 0  |
| ≥ 2 unique peptides | rmAC2726 | Q5UZ11_HALMA       | <i>pepB3</i>     | Aminopeptidase                                                                              | 0  | 0  | 31 | 12 | 1  | 1  | 60 | 13 | 31 | 61 | 92  | 0.5 | No dramatic change | 1   | 91 | 1.1   | Soluble predominant | 363 | 0  |
| ≥ 2 unique peptides | rmAC0266 | Q5V579_HALMA       | <i>rrmAC0266</i> | Hypothetical protein                                                                        | 16 | 5  | 21 | 5  | 27 | 7  | 26 | 6  | 37 | 53 | 90  | 0.7 | No dramatic change | 43  | 47 | 47.8  | Memb + Sol          | 237 | 0  |
| ≥ 2 unique peptides | rmAC1732 | PDXS_HALMARReview  | <i>pdxS</i>      | Pyridoxal biosynthesis lyase pdxS (EC 4.-.-.-)                                              | 2  | 2  | 44 | 14 | 2  | 2  | 42 | 15 | 46 | 44 | 90  | 1.0 | No dramatic change | 4   | 86 | 4.4   | Soluble predominant | 302 | 0  |
| ≥ 2 unique peptides | rmAC0431 | Q5V4T7_HALMA       | <i>tot</i>       | Transmembrane oligosaccharyl transferase                                                    | 55 | 15 | 0  | 0  | 35 | 10 | 0  | 0  | 55 | 35 | 90  | 1.6 | No dramatic change | 90  | 0  | 100.0 | Memb only           | 937 | 13 |
| ≥ 2 unique peptides | rmAC0250 | Q5V595_HALMA       | <i>rrmAC0250</i> | Hypothetical protein                                                                        | 47 | 14 | 0  | 0  | 42 | 13 | 0  | 0  | 47 | 42 | 89  | 1.1 | No dramatic change | 89  | 0  | 100.0 | Memb only           | 497 | 2  |
| ≥ 2 unique peptides | rmAC0771 | Q5V3Z2_HALMA       | <i>paaH</i>      | β-hydroxybutyryl-CoA dehydrogenase (EC 1.1.1.35)                                            | 0  | 0  | 31 | 9  | 0  | 0  | 58 | 9  | 31 | 58 | 89  | 0.5 | No dramatic change | 0   | 89 | 0.0   | Soluble only        | 285 | 0  |
| ≥ 2 unique peptides | rmAC2430 | Q5UZR2_HALMA       | <i>rpoB</i>      | DNA-directed RNA polymerase subunit B                                                       | 21 | 12 | 33 | 12 | 7  | 5  | 27 | 16 | 54 | 34 | 88  | 1.6 | No dramatic change | 28  | 60 | 31.8  | Memb + Sol          | 521 | 0  |
| ≥ 2 unique peptides | rmAC1812 | Q5V1A2_HALMA       | <i>pnm</i>       | N-methyltransferase-like                                                                    | 52 | 13 | 0  | 0  | 36 | 9  | 0  | 0  | 52 | 36 | 88  | 1.4 | No dramatic change | 88  | 0  | 100.0 | Memb only           | 174 | 0  |
| ≥ 2 unique peptides | rmAC1174 | PSMA1_HALMARReview | <i>psmA1</i>     | Proteasome alpha subunit (EC 3.4.25.1) (Multicatalytic endopeptidasecomplex alpha subunit)  | 0  | 0  | 50 | 10 | 1  | 1  | 37 | 12 | 50 | 38 | 88  | 1.3 | No dramatic change | 1   | 87 | 1.1   | Soluble predominant | 260 | 0  |
| ≥ 2 unique peptides | rmAC2600 | Q5UZB4_HALMA       | <i>rrmAC2600</i> | Hypothetical protein                                                                        | 49 | 13 | 0  | 0  | 38 | 12 | 0  | 0  | 49 | 38 | 87  | 1.3 | No dramatic change | 87  | 0  | 100.0 | Memb only           | 475 | 2  |
| ≥ 2 unique peptides | rmAC3161 | Q5UXY6_HALMA       | <i>bop</i>       | Bacteriorhodopsin                                                                           | 32 | 5  | 0  | 0  | 55 | 5  | 0  | 0  | 32 | 55 | 87  | 0.6 | No dramatic change | 87  | 0  | 100.0 | Memb only           | 250 | 7  |
| ≥ 2 unique peptides | rmAC1698 | Q5V1J8_HALMA       | <i>moxR2</i>     | Methanol dehydrogenase regulatory protein                                                   | 11 | 5  | 40 | 13 | 12 | 6  | 23 | 11 | 51 | 35 | 86  | 1.5 | No dramatic change | 23  | 63 | 26.7  | Memb + Sol          | 315 | 0  |
| ≥ 2 unique peptides | rmAC3467 | Q5UX61_HALMA       | <i>pspA1</i>     | Transcription regulator                                                                     | 45 | 13 | 0  | 0  | 40 | 11 | 0  | 0  | 45 | 40 | 85  | 1.1 | No dramatic change | 85  | 0  | 100.0 | Memb only           | 280 | 0  |
| ≥ 2 unique peptides | rmAC1067 | Q5V373_HALMA       | <i>prk1</i>      | Protein kinase                                                                              | 1  | 1  | 44 | 20 | 2  | 2  | 38 | 20 | 45 | 40 | 85  | 1.1 | No dramatic change | 3   | 82 | 3.5   | Soluble predominant | 690 | 0  |
| ≥ 2 unique peptides | rmAC2229 | Q5V091_HALMA       | <i>dppB1</i>     | Dipeptide ABC transporter permease                                                          | 47 | 10 | 0  | 0  | 38 | 7  | 0  | 0  | 47 | 38 | 85  | 1.2 | No dramatic change | 85  | 0  | 100.0 | Memb only           | 360 | 6  |
| ≥ 2 unique peptides | rmAC3295 | Q5UXL5_HALMA       | <i>ykJD</i>      | Oligopeptide ABC transporter ATP-binding                                                    | 43 | 13 | 0  | 0  | 42 | 15 | 0  | 0  | 43 | 42 | 85  | 1.0 | No dramatic change | 85  | 0  | 100.0 | Memb only           | 469 | 0  |
| ≥ 2 unique peptides | rmAC0847 | Q5V3S4_HALMA       | <i>alkK3</i>     | Medium-chain acyl-CoA ligase                                                                | 0  | 0  | 35 | 12 | 2  | 2  | 47 | 16 | 35 | 49 | 84  | 0.7 | No dramatic change | 2   | 82 | 2.4   | Soluble predominant | 539 | 0  |
| ≥ 2 unique peptides | rmAC3148 | Q5UXZ8_HALMA       | <i>etfB1</i>     | Electron transfer flavoprotein beta subunit                                                 | 1  | 1  | 40 | 3  | 2  | 1  | 41 | 6  | 41 | 43 | 84  | 1.0 | No dramatic change | 3   | 81 | 3.6   | Soluble predominant | 263 | 0  |
| ≥ 2 unique peptides | rmAC1001 | Q5V3D5_HALMA       | <i>rrmAC1001</i> | Hypothetical protein                                                                        | 0  | 0  | 47 | 11 | 2  | 1  | 35 | 10 | 47 | 37 | 84  | 1.3 | No dramatic change | 2   | 82 | 2.4   | Soluble predominant | 272 | 0  |
| ≥ 2 unique peptides | pNG5004  | Q5V7G7_HALMA       | <i>pNG5004</i>   | Hypothetical protein                                                                        | 38 | 9  | 0  | 0  | 44 | 9  | 0  | 0  | 38 | 44 | 82  | 0.9 | No dramatic change | 82  | 0  | 100.0 | Memb only           | 355 | 1  |
| ≥ 2 unique peptides | rmAC2955 | Q5UYG4_HALMA       | <i>pdhC2</i>     | Dihydrolipoamide acetyltransferase component of pyruvate dehydrogenasecomplex (EC 2.3.1.12) | 4  | 4  | 32 | 15 | 8  | 5  | 38 | 19 | 36 | 46 | 82  | 0.8 | No dramatic change | 12  | 70 | 14.6  | Soluble predominant | 545 | 0  |
| ≥ 2 unique peptides | rmAC2947 | Q5UYH2_HALMA       | <i>leuS2</i>     | Leucyl-tRNA synthetase (EC 6.1.1.4)                                                         | 0  | 0  | 35 | 13 | 0  | 0  | 46 | 19 | 35 | 46 | 81  | 0.8 | No dramatic change | 0   | 81 | 0.0   | Soluble only        | 895 | 0  |
| ≥ 2 unique peptides | rmAC2439 | Q5UZQ5_HALMA       | <i>tnaA</i>      | Tryptophanase (EC 4.1.99.1)                                                                 | 3  | 2  | 9  | 4  | 11 | 4  | 57 | 21 | 12 | 68 | 80  | 0.2 | 1.2 (>3X)          | 14  | 66 | 17.5  | Soluble predominant | 447 | 0  |
| ≥ 2 unique peptides | rmAC3346 | KAD_HALMARReview   | <i>adk</i>       | Adenylate kinase (EC 2.7.4.3) (ATP-AMP transphosphorylase)                                  | 0  | 0  | 39 | 14 | 0  | 0  | 40 | 13 | 39 | 40 | 79  | 1.0 | No dramatic change | 0   | 79 | 0.0   | Soluble only        | 216 | 0  |
| ≥ 2 unique peptides | rmAC0358 | Q5V4Z8_HALMA       | <i>imp-1</i>     | Immunogenic protein                                                                         | 35 | 13 | 0  | 0  | 44 | 15 | 0  | 0  | 35 | 44 | 79  | 0.8 | No dramatic change | 79  | 0  | 100.0 | Memb only           | 382 | 0  |
| ≥ 2 unique peptides | rmAC0890 | Q5V3N4_HALMA       | <i>frt</i>       | Ferritin                                                                                    | 0  | 0  | 34 | 11 | 2  | 2  | 42 | 15 | 34 | 44 | 78  | 0.8 | No dramatic change | 2   | 76 | 2.6   | Soluble predominant | 179 | 0  |
| ≥ 2 unique peptides | rmB0207  | Q5UWG3_HALMA       | <i>rrmB0207</i>  | Putative extracellular ligand binding protein                                               | 59 | 16 | 0  | 0  | 19 | 8  | 0  | 0  | 59 | 19 | 78  | 3.1 | 0.7 (>3X)          | 78  | 0  | 100.0 | Memb only           | 414 | 0  |
| ≥ 2 unique peptides | rmAC2129 | Q5V0H6_HALMA       | <i>sseA2</i>     | Thiosulfate sulfurtransferase                                                               | 0  | 0  | 45 | 9  | 4  | 2  | 29 | 8  | 45 | 33 | 78  | 1.4 | No dramatic change | 4   | 74 | 5.1   | Soluble predominant | 297 | 0  |
| ≥ 2 unique peptides | rmAC1791 | Q5V1C0_HALMA       | <i>hutH</i>      | Histidine ammonia-lyase (EC 4.3.1.3)                                                        | 3  | 2  | 20 | 8  | 5  | 2  | 50 | 15 | 23 | 55 | 78  | 0.4 | 1.2 (2-3X)         | 8   | 70 | 10.3  | Soluble predominant | 549 | 0  |
| ≥ 2 unique peptides | rmAC1820 | Q5V195_HALMA       | <i>rrmAC1820</i> | Hypothetical protein                                                                        | 0  | 0  | 44 | 17 | 0  | 0  | 33 | 12 | 44 | 33 | 77  | 1.3 | No dramatic change | 0   | 77 | 0.0   | Soluble only        | 296 | 0  |
| ≥ 2 unique peptides | rmAC1828 | Q5V187_HALMA       | <i>rrmAC1828</i> | Hypothetical protein                                                                        | 0  | 0  | 37 | 12 | 0  | 0  | 39 | 11 | 37 | 39 | 76  | 0.9 | No dramatic change | 0   | 76 | 0.0   | Soluble only        | 403 | 0  |
| ≥ 2 unique peptides | rmAC2414 | Q5UZS6_HALMA       | <i>metB</i>      | Cystathionine gamma-synthase (EC 2.5.1.48)                                                  | 0  | 0  | 30 | 5  | 1  | 1  | 45 | 10 | 30 | 46 | 76  | 0.7 | No dramatic change | 1   | 75 | 1.3   | Soluble predominant | 411 | 0  |
| ≥ 2 unique peptides | rmAC3125 | Q5UY19_HALMA       | <i>usp33</i>     | Universal stress protein                                                                    | 4  | 3  | 27 | 6  | 13 | 7  | 32 | 8  | 31 | 45 | 76  | 0.7 | No dramatic change | 17  | 59 | 22.4  | Soluble predominant | 132 | 0  |
| ≥ 2 unique peptides | rmAC2423 | RS7_HALMARReview   | <i>rps7p</i>     | 30S ribosomal protein S7P (HmaS7)                                                           | 13 | 7  | 22 | 12 | 22 | 10 | 18 | 8  | 35 | 40 | 75  | 0.9 | No dramatic change | 35  | 40 | 46.7  | Memb + Sol          | 206 | 0  |
| ≥ 2 unique peptides | rmAC0233 | Q5V5B0_HALMA       | <i>ykJB2</i>     | Chloromuconate cycloisomerase                                                               | 0  | 0  | 11 | 5  | 7  | 3  | 56 | 11 | 11 | 63 | 74  | 0.2 | 1.2 (>3X)          | 7   | 67 | 9.5   | Soluble predominant | 359 | 0  |
| ≥ 2 unique peptides | rmAC1605 | RS3_HALMARReview   | <i>rps3p</i>     | 30S ribosomal protein S3P (HmaS3) (HS1)                                                     | 1  | 1  | 52 | 14 | 0  | 0  | 21 | 9  | 53 | 21 | 74  | 2.5 | 0.7 (2>3X)         | 1   | 73 | 1.4   | Soluble predominant | 304 | 0  |
| ≥ 2 unique peptides | rmAC0906 | Q5V3M0_HALMA       | <i>ihp</i>       | Iron-binding protein                                                                        | 52 | 5  | 0  | 0  | 22 | 4  | 0  | 0  | 52 | 22 | 74  | 2.4 | 0.7 (2>3X)         | 74  | 0  | 100.0 | Memb only           | 401 | 0  |
| ≥ 2 unique peptides | rmAC3053 | Q5UY81_HALMA       | <i>rrmAC3053</i> | ABC transporter ATP-binding protein                                                         | 43 | 11 | 0  | 0  | 31 | 9  | 0  | 0  | 43 | 31 | 74  | 1.4 | No dramatic change | 74  | 0  | 100.0 | Memb only           | 312 | 0  |
| ≥ 2 unique peptides | rmAC0381 | Q5V4X9_HALMA       | <i>glmH1</i>     | Glutamine ABC transporter permease protein                                                  | 43 | 6  | 0  | 0  | 31 | 7  | 0  | 0  | 43 | 31 | 74  | 1.4 | No dramatic change | 74  | 0  | 100.0 | Memb only           | 262 | 0  |
| ≥ 2 unique peptides | rmAC0159 | Q5V5H5_HALMA       | <i>rrmAC0159</i> | Hypothetical protein                                                                        | 32 | 11 | 8  | 4  | 30 | 10 | 3  | 3  | 40 | 33 | 73  | 1.2 | No dramatic change | 62  | 11 | 84.9  | Memb predominant    | 195 | 0  |
| ≥ 2 unique peptides | rmAC2716 | Q5UZ20_HALMA       | <i>cysD</i>      | O-acetylhomoserine (Thiol)-lyase (EC 2.5.1.49)                                              | 2  | 1  | 29 | 9  | 3  | 2  | 39 | 12 | 31 | 42 | 73  | 0.7 | No dramatic change | 5   | 68 | 6.8   | Soluble predominant | 432 | 0  |
| ≥ 2 unique peptides | rmAC0748 | Q5V413_HALMA       | <i>guaB3</i>     | Inosine-5'-monophosphate dehydrogenase (EC 1.1.1.205)                                       | 0  | 0  | 35 | 9  | 1  | 1  | 35 | 13 | 35 | 36 | 71  | 1.0 | No dramatic change | 1   | 70 | 1.4   | Soluble predominant | 494 | 0  |
| ≥ 2 unique peptides | rmAC3296 | Q5UXL4_HALMA       | <i>oppD2</i>     | Oligopeptide ABC transporter ATPase component                                               | 31 | 10 | 0  | 0  | 40 | 12 | 0  | 0  | 31 | 40 | 71  | 0.8 | No dramatic change | 71  | 0  | 100.0 | Memb only           | 406 | 0  |



|                     |          |                    |                  |                                                                                             |    |    |    |    |    |    |    |    |    |    |    |     |                    |    |    |       |                     |      |    |
|---------------------|----------|--------------------|------------------|---------------------------------------------------------------------------------------------|----|----|----|----|----|----|----|----|----|----|----|-----|--------------------|----|----|-------|---------------------|------|----|
| ≥ 2 unique peptides | rmAC1252 | Q5V2Q8_HALMA       | <i>lrp</i>       | Leucine responsive regulatory protein                                                       | 0  | 0  | 41 | 13 | 1  | 1  | 28 | 11 | 41 | 29 | 70 | 1.4 | No dramatic change | 1  | 69 | 1.4   | Soluble predominant | 164  | 0  |
| ≥ 2 unique peptides | rmAC2108 | Q5V0J4_HALMA       | <i>npdG-1</i>    | F420-dependent NADP reductase (EC 1.6.8.-)                                                  | 1  | 1  | 36 | 9  | 3  | 2  | 30 | 8  | 37 | 33 | 70 | 1.1 | No dramatic change | 4  | 66 | 5.7   | Soluble predominant | 222  | 0  |
| ≥ 2 unique peptides | pNG7110  | Q5V6N0_HALMA       | <i>pNG7110</i>   | Putative permease                                                                           | 35 | 13 | 0  | 0  | 35 | 12 | 0  | 0  | 35 | 35 | 70 | 1.0 | No dramatic change | 70 | 0  | 100.0 | Memb only           | 318  | 4  |
| ≥ 2 unique peptides | rmAC2634 | SY1_HALMARReview   | <i>ileS</i>      | Isoleucyl-tRNA synthetase (EC 6.1.1.5) (Isoleucine--tRNA ligase)(IleRS)                     | 0  | 0  | 25 | 13 | 0  | 0  | 45 | 21 | 25 | 45 | 70 | 0.6 | No dramatic change | 0  | 70 | 0.0   | Soluble only        | 1074 | 0  |
| ≥ 2 unique peptides | rmAC3189 | Q5UXV9_HALMA       | <i>pepF</i>      | Oligoendopeptidase F (EC 3.4.24.-)                                                          | 1  | 1  | 37 | 9  | 1  | 1  | 30 | 10 | 38 | 31 | 69 | 1.2 | No dramatic change | 2  | 67 | 2.9   | Soluble predominant | 596  | 0  |
| ≥ 2 unique peptides | pNG7059  | Q5V6S5_HALMA       | <i>prcC</i>      | Regulatory protein PrcC                                                                     | 38 | 9  | 1  | 1  | 29 | 8  | 0  | 0  | 39 | 29 | 68 | 1.3 | No dramatic change | 67 | 1  | 98.5  | Memb predominant    | 225  | 0  |
| ≥ 2 unique peptides | rmAC1542 | Q5V1Z1_HALMA       | <i>rrmAC1542</i> | Hypothetical protein                                                                        | 37 | 14 | 0  | 0  | 31 | 14 | 0  | 0  | 37 | 31 | 68 | 1.2 | No dramatic change | 68 | 0  | 100.0 | Memb only           | 547  | 1  |
| ≥ 2 unique peptides | rmB0264  | Q5UWB8_HALMA       | <i>acdH</i>      | Acyl-CoA dehydrogenase (EC 1.3.99.3)                                                        | 0  | 0  | 37 | 11 | 0  | 0  | 31 | 13 | 37 | 31 | 68 | 1.2 | No dramatic change | 0  | 68 | 0.0   | Soluble only        | 388  | 0  |
| ≥ 2 unique peptides | rmAC1010 | Q5V3C7_HALMA       | <i>rfbB1</i>     | DTDP-glucose 4-6-dehydratase (EC 4.2.1.46)                                                  | 7  | 6  | 22 | 6  | 6  | 5  | 33 | 11 | 29 | 39 | 68 | 0.7 | No dramatic change | 13 | 55 | 19.1  | Soluble predominant | 353  | 0  |
| ≥ 2 unique peptides | rmAC1404 | Q5V2B9_HALMA       | <i>usp28</i>     | Universal stress protein                                                                    | 2  | 1  | 35 | 12 | 4  | 2  | 27 | 10 | 37 | 31 | 68 | 1.2 | No dramatic change | 6  | 62 | 8.8   | Soluble predominant | 137  | 0  |
| ≥ 2 unique peptides | rmAC2160 | Q5V0E9_HALMA       | <i>rrmAC2160</i> | Putative DNA binding protein                                                                | 3  | 2  | 37 | 6  | 4  | 2  | 23 | 7  | 40 | 27 | 67 | 1.5 | No dramatic change | 7  | 60 | 10.4  | Soluble predominant | 219  | 0  |
| ≥ 2 unique peptides | rmAC1829 | Q5V186_HALMA       | <i>rrmAC1829</i> | Hypothetical protein                                                                        | 0  | 0  | 31 | 14 | 0  | 0  | 36 | 11 | 31 | 36 | 67 | 0.9 | No dramatic change | 0  | 67 | 0.0   | Soluble only        | 476  | 0  |
| ≥ 2 unique peptides | rmAC1225 | PYRB_HALMARReview  | <i>pyrB</i>      | Aspartate carbamoyltransferase (EC 2.1.3.2) (Aspartatecarbamylase) (ATCase)                 | 4  | 4  | 29 | 15 | 2  | 2  | 32 | 11 | 33 | 34 | 67 | 1.0 | No dramatic change | 6  | 61 | 9.0   | Soluble predominant | 304  | 0  |
| ≥ 2 unique peptides | rmAC2953 | DLDH2_HALMARReview | <i>lpdA2</i>     | Dihydrolipoyl dehydrogenase 2 (EC 1.8.1.4) (Dihydrolipoamide dehydrogenase 2)               | 0  | 0  | 30 | 11 | 0  | 0  | 37 | 13 | 30 | 37 | 67 | 0.8 | No dramatic change | 0  | 67 | 0.0   | Soluble only        | 472  | 0  |
| ≥ 2 unique peptides | rmAC1773 | PSMA2_HALMARReview | <i>psmA2</i>     | Proteasome alpha subunit (EC 3.4.25.1) (Multicatalytic endopeptidase complex alpha subunit) | 0  | 0  | 47 | 13 | 0  | 0  | 20 | 8  | 47 | 20 | 67 | 2.4 | 0.7 (2>3X)         | 0  | 67 | 0.0   | Soluble only        | 244  | 0  |
| ≥ 2 unique peptides | rmAC0064 | RL18E_HALMARReview | <i>rpl18e</i>    | 50S ribosomal protein L18e (Hi29) (L19)                                                     | 37 | 10 | 4  | 3  | 26 | 10 | 0  | 0  | 41 | 26 | 67 | 1.6 | No dramatic change | 63 | 4  | 94.0  | Memb predominant    | 116  | 0  |
| ≥ 2 unique peptides | rmAC3116 | PFDA_HALMARReview  | <i>pfidA</i>     | Prefoldin alpha subunit (GimC alpha subunit)                                                | 0  | 0  | 33 | 10 | 0  | 0  | 33 | 9  | 33 | 33 | 66 | 1.0 | No dramatic change | 0  | 66 | 0.0   | Soluble only        | 154  | 0  |
| ≥ 2 unique peptides | rmAC2590 | Q5UZC2_HALMA       | <i>cstA</i>      | Carbon starvation protein CstA                                                              | 26 | 5  | 0  | 0  | 40 | 6  | 0  | 0  | 26 | 40 | 66 | 0.7 | No dramatic change | 66 | 0  | 100.0 | Memb only           | 631  | 13 |
| ≥ 2 unique peptides | pNG6189  | Q5V7C3_HALMA       | <i>pNG6189</i>   | Hypothetical protein                                                                        | 0  | 0  | 28 | 13 | 0  | 0  | 37 | 19 | 28 | 37 | 65 | 0.8 | No dramatic change | 0  | 65 | 0.0   | Soluble only        | 1097 | 0  |
| ≥ 2 unique peptides | rmAC1152 | Q5V2Z9_HALMA       | <i>hcp5</i>      | Halocyanin-like                                                                             | 38 | 5  | 0  | 0  | 27 | 5  | 0  | 0  | 38 | 27 | 65 | 1.4 | No dramatic change | 65 | 0  | 100.0 | Memb only           | 409  | 2  |
| ≥ 2 unique peptides | rmAC1109 | Q5V336_HALMA       | <i>purD2</i>     | Phosphoribosylamine-glycine ligase (EC 6.3.4.13)                                            | 0  | 0  | 33 | 12 | 2  | 1  | 30 | 10 | 33 | 32 | 65 | 1.0 | No dramatic change | 2  | 63 | 3.1   | Soluble predominant | 450  | 0  |
| ≥ 2 unique peptides | rmAC3285 | Q5UXM4_HALMA       | <i>nolA</i>      | NADH dehydrogenase/oxidoreductase-like protein                                              | 9  | 4  | 18 | 8  | 23 | 5  | 15 | 7  | 27 | 38 | 65 | 0.7 | No dramatic change | 32 | 33 | 49.2  | Memb + Sol          | 299  | 0  |
| ≥ 2 unique peptides | pNG6088  | Q5V746_HALMA       | <i>pNG6088</i>   | Hypothetical protein                                                                        | 31 | 16 | 0  | 0  | 32 | 15 | 1  | 1  | 31 | 33 | 64 | 0.9 | No dramatic change | 63 | 1  | 98.4  | Memb predominant    | 435  | 0  |
| ≥ 2 unique peptides | rmAC3021 | Q5UYA7_HALMA       | <i>cbiJ</i>      | Precorrin-3 methylase                                                                       | 0  | 0  | 38 | 15 | 1  | 1  | 25 | 11 | 38 | 26 | 64 | 1.5 | No dramatic change | 1  | 63 | 1.6   | Soluble predominant | 254  | 0  |
| ≥ 2 unique peptides | rmAC2755 | Q5UY6_HALMA        | <i>rrmAC2755</i> | Hypothetical protein                                                                        | 31 | 7  | 0  | 0  | 32 | 8  | 0  | 0  | 31 | 32 | 63 | 1.0 | No dramatic change | 63 | 0  | 100.0 | Memb only           | 418  | 6  |
| ≥ 2 unique peptides | rmAC0741 | Q5V418_HALMA       | <i>hat2</i>      | Probable acetyltransferase                                                                  | 0  | 0  | 35 | 7  | 0  | 0  | 28 | 6  | 35 | 28 | 63 | 1.3 | No dramatic change | 0  | 63 | 0.0   | Soluble only        | 179  | 0  |
| ≥ 2 unique peptides | rmAC1973 | Q5V0W3_HALMA       | <i>aldY4</i>     | Aldehyde dehydrogenase (EC 1.2.1.3)                                                         | 0  | 0  | 21 | 5  | 1  | 1  | 41 | 9  | 21 | 42 | 63 | 0.5 | 1.2 (2-3X)         | 1  | 62 | 1.6   | Soluble predominant | 489  | 0  |
| ≥ 2 unique peptides | rmAC1347 | Q5V2H4_HALMA       | <i>rrmAC1347</i> | Putative mechanosensitive ion channel                                                       | 34 | 7  | 0  | 0  | 28 | 6  | 0  | 0  | 34 | 28 | 62 | 1.2 | No dramatic change | 62 | 0  | 100.0 | Memb only           | 293  | 3  |
| ≥ 2 unique peptides | rmAC1680 | PFDB_HALMARReview  | <i>pfidB</i>     | Prefoldin beta subunit (GimC beta subunit)                                                  | 0  | 0  | 30 | 12 | 1  | 1  | 30 | 11 | 30 | 31 | 61 | 1.0 | No dramatic change | 1  | 60 | 1.6   | Soluble predominant | 129  | 0  |
| ≥ 2 unique peptides | rmAC0457 | Q5V4R5_HALMA       | <i>top6B</i>     | Type II DNA topoisomerase VI subunit B (EC 5.99.1.3)                                        | 13 | 7  | 24 | 13 | 4  | 2  | 20 | 10 | 37 | 24 | 61 | 1.5 | No dramatic change | 17 | 44 | 27.9  | Memb + Sol          | 796  | 0  |
| ≥ 2 unique peptides | rmAC0220 | Q5V5C3_HALMA       | <i>rrmAC0220</i> | Hypothetical protein                                                                        | 30 | 6  | 1  | 1  | 29 | 5  | 1  | 1  | 31 | 30 | 61 | 1.0 | No dramatic change | 59 | 2  | 96.7  | Memb predominant    | 95   | 0  |
| ≥ 2 unique peptides | rmAC0189 | Q5V5F0_HALMA       | <i>purH</i>      | Bifunctional purine biosynthesis protein PurH (EC 3.5.4.10)(EC 2.1.2.3)(EC 2.1.2.2)         | 0  | 0  | 28 | 9  | 0  | 0  | 33 | 10 | 28 | 33 | 61 | 0.8 | No dramatic change | 0  | 61 | 0.0   | Soluble only        | 526  | 0  |
| ≥ 2 unique peptides | rmAC2092 | Q5V0K8_HALMA       | <i>cxp</i>       | Probable carboxypeptidase                                                                   | 0  | 0  | 22 | 10 | 5  | 1  | 34 | 13 | 22 | 39 | 61 | 0.6 | No dramatic change | 5  | 56 | 8.2   | Soluble predominant | 500  | 0  |
| ≥ 2 unique peptides | rmAC2301 | Q5V028_HALMA       | <i>hpyA</i>      | Archaeal histone A1                                                                         | 2  | 1  | 21 | 8  | 2  | 1  | 35 | 11 | 23 | 37 | 60 | 0.6 | No dramatic change | 4  | 56 | 6.7   | Soluble predominant | 145  | 0  |
| ≥ 2 unique peptides | rmB0261  | Q5UWC0_HALMA       | <i>pccB</i>      | Propionyl-CoA carboxylase beta subunit                                                      | 0  | 0  | 40 | 17 | 0  | 0  | 20 | 13 | 40 | 20 | 60 | 2.0 | 0.7 (2>3X)         | 0  | 60 | 0.0   | Soluble only        | 572  | 0  |
| ≥ 2 unique peptides | rmAC3020 | Q5UYA8_HALMA       | <i>cbiC</i>      | Precorrin-8X methylmutase (EC 5.4.1.2)                                                      | 1  | 1  | 35 | 9  | 2  | 1  | 22 | 8  | 36 | 24 | 60 | 1.5 | No dramatic change | 3  | 57 | 5.0   | Soluble predominant | 241  | 0  |
| ≥ 2 unique peptides | rmAC2568 | Q5UZE1_HALMA       | <i>pmm</i>       | Phosphoglucomutase/phosphomannomutase (EC 5.4.2.2) (EC 5.4.2.8)                             | 0  | 0  | 22 | 10 | 3  | 3  | 34 | 14 | 22 | 37 | 59 | 0.6 | No dramatic change | 3  | 56 | 5.1   | Soluble predominant | 479  | 0  |
| ≥ 2 unique peptides | rmAC1182 | THIC_HALMARReview  | <i>thiC</i>      | Thiamine biosynthesis protein thiC                                                          | 0  | 0  | 0  | 0  | 2  | 1  | 57 | 21 | 0  | 59 | 59 | 0.0 | 1.2 only           | 2  | 57 | 3.4   | Soluble predominant | 480  | 0  |
| ≥ 2 unique peptides | rmAC1251 | Q5V2Q9_HALMA       | <i>aspB1</i>     | Aspartate aminotransferase (EC 2.6.1.1)                                                     | 2  | 1  | 34 | 10 | 0  | 0  | 22 | 10 | 36 | 22 | 58 | 1.6 | No dramatic change | 2  | 56 | 3.4   | Soluble predominant | 381  | 0  |
| ≥ 2 unique peptides | rmAC0633 | Q5V4B1_HALMA       | <i>rffH2</i>     | Glucose-1-phosphate thymidyltransferase (EC 2.7.7.24)                                       | 0  | 0  | 35 | 9  | 0  | 0  | 23 | 9  | 35 | 23 | 58 | 1.5 | No dramatic change | 0  | 58 | 0.0   | Soluble only        | 335  | 0  |
| ≥ 2 unique peptides | rmAC2957 | Q5UYG2_HALMA       | <i>pdhA3</i>     | Pyruvate dehydrogenase E1 component alpha subunit (EC 1.2.4.1)(EC 1.2.4.4)                  | 0  | 0  | 31 | 13 | 0  | 0  | 27 | 11 | 31 | 27 | 58 | 1.1 | No dramatic change | 0  | 58 | 0.0   | Soluble only        | 368  | 0  |
| ≥ 2 unique peptides | rmAC0302 | ILVD_HALMARReview  | <i>ihvD</i>      | Dihydroxy-acid dehydratase (EC 4.2.1.9) (DAD)                                               | 0  | 0  | 26 | 9  | 0  | 0  | 32 | 12 | 26 | 32 | 58 | 0.8 | No dramatic change | 0  | 58 | 0.0   | Soluble only        | 575  | 0  |
| ≥ 2 unique peptides | rmAC3267 | Q5UXP0_HALMA       | <i>rrmAC3267</i> | Molybdate transport protein                                                                 | 31 | 2  | 0  | 0  | 27 | 2  | 0  | 0  | 31 | 27 | 58 | 1.1 | No dramatic change | 58 | 0  | 100.0 | Memb only           | 320  | 0  |
| ≥ 2 unique peptides | rmAC2851 | PCNA_HALMARReview  | <i>pcn</i>       | DNA polymerase sliding clamp (Proliferating cell nuclear antigenhomolog) (PCNA)             | 2  | 2  | 22 | 9  | 3  | 2  | 30 | 8  | 24 | 33 | 57 | 0.7 | No dramatic change | 5  | 52 | 8.8   | Soluble predominant | 247  | 0  |
| ≥ 2 unique peptides | rmAC2307 | Q5V022_HALMA       | <i>rrmAC2307</i> | Hypothetical protein                                                                        | 34 | 7  | 0  | 0  | 23 | 5  | 0  | 0  | 34 | 23 | 57 | 1.5 | No dramatic change | 57 | 0  | 100.0 | Memb only           | 368  | 7  |
| ≥ 2 unique peptides | rmAC1372 | Q5V2F1_HALMA       | <i>ccpA</i>      | Cytochrome c551 peroxidase                                                                  | 34 | 7  | 0  | 0  | 23 | 6  | 0  | 0  | 34 | 23 | 57 | 1.5 | No dramatic change | 57 | 0  | 100.0 | Memb only           | 474  | 2  |
| ≥ 2 unique peptides | rmAC0065 | RL13_HALMARReview  | <i>rpl13p</i>    | 50S ribosomal protein L13P (Hmal13)                                                         | 30 | 7  | 0  | 0  | 26 | 8  | 1  | 1  | 30 | 27 | 57 | 1.1 | No dramatic change | 56 | 1  | 98.2  | Memb predominant    | 145  | 0  |
| ≥ 2 unique peptides | pNG7149  | Q5V6J5_HALMA       | <i>draA-2</i>    | ABC transporter ATP-binding protein                                                         | 29 | 8  | 0  | 0  | 28 | 6  | 0  | 0  | 29 | 28 | 57 | 1.0 | No dramatic change | 57 | 0  | 100.0 | Memb only           | 241  | 0  |
| ≥ 2 unique peptides | rmAC0502 | Q5V4M8_HALMA       | <i>ycdH</i>      | Adhesion protein                                                                            | 26 | 11 | 0  | 0  | 31 | 9  | 0  | 0  | 26 | 31 | 57 | 0.8 | No dramatic change | 57 | 0  | 100.0 | Memb only           | 361  | 0  |
| ≥ 2 unique peptides | pNG6087  | Q5V747_HALMA       | <i>pNG6087</i>   | Hypothetical protein                                                                        | 26 | 7  | 0  | 0  | 30 | 9  | 0  | 0  | 26 | 30 | 56 | 0.9 | No dramatic change | 56 | 0  | 100.0 | Memb only           | 353  | 0  |
| ≥ 2 unique peptides | rmB0240  | Q5UWD8_HALMA       | <i>aca1</i>      | Acetyl-coA acetyltransferase (EC 2.3.1.9)                                                   | 2  | 1  | 29 | 11 | 0  | 0  | 25 | 10 | 31 | 25 | 56 | 1.2 | No dramatic change | 2  | 54 | 3.6   | Soluble predominant | 381  | 0  |
| ≥ 2 unique peptides | rmAC0229 | Q5V5B4_HALMA       | <i>nhaC1</i>     | Na+/H+ antiporter                                                                           | 28 | 8  | 0  | 0  | 28 | 7  | 0  | 0  | 28 | 28 | 56 | 1.0 | No dramatic change | 56 | 0  | 100.0 | Memb only           | 517  | 11 |
| ≥ 2 unique peptides | rmAC1278 | Q5V2N6_HALMA       | <i>coxA1</i>     | Cytochrome c oxidase polypeptide I (EC 1.9.3.1)                                             | 26 | 4  | 0  | 0  | 29 | 4  | 0  | 0  | 26 | 29 | 55 | 0.9 | No dramatic change | 55 | 0  | 100.0 | Memb only           | 594  | 13 |
| ≥ 2 unique peptides | rmAC1613 | Q5V1S2_HALMA       | <i>rrmAC1613</i> | Hypothetical protein                                                                        | 8  | 4  | 19 | 8  | 9  | 5  | 19 | 10 | 27 | 28 | 55 | 1.0 | No dramatic change | 17 | 38 | 30.9  | Memb + Sol          | 215  | 0  |
| ≥ 2 unique peptides | rmAC1301 | Q5V2L5_HALMA       | <i>yjID2</i>     | NADH dehydrogenase                                                                          | 14 | 6  | 15 | 5  | 16 | 5  |    |    |    |    |    |     |                    |    |    |       |                     |      |    |

|                     |          |                    |                 |                                                                                            |    |    |    |    |    |    |    |    |    |    |    |     |                    |    |    |       |                     |     |    |
|---------------------|----------|--------------------|-----------------|--------------------------------------------------------------------------------------------|----|----|----|----|----|----|----|----|----|----|----|-----|--------------------|----|----|-------|---------------------|-----|----|
| ≥ 2 unique peptides | rmAC0428 | Q5V4U0_HALMA       | <i>yidJ</i>     | Putative sulfatase                                                                         | 18 | 9  | 9  | 5  | 23 | 12 | 5  | 4  | 27 | 28 | 55 | 1.0 | No dramatic change | 41 | 14 | 74.5  | Memb + Sol          | 451 | 0  |
| ≥ 2 unique peptides | rmAC0719 | Q5V440_HALMA       | <i>porB</i>     | Pyruvate ferredoxin oxidoreductase subunit beta (EC 1.2.7.3)(EC 1.2.7.1)                   | 1  | 1  | 26 | 8  | 0  | 0  | 28 | 10 | 27 | 28 | 55 | 1.0 | No dramatic change | 1  | 54 | 1.8   | Soluble predominant | 287 | 0  |
| ≥ 2 unique peptides | rmAC1458 | Q5V269_HALMA       | <i>ndhG3</i>    | NADH dehydrogenase/oxidoreductase                                                          | 24 | 5  | 0  | 0  | 31 | 5  | 0  | 0  | 24 | 31 | 55 | 0.8 | No dramatic change | 55 | 0  | 100.0 | Memb only           | 516 | 13 |
| ≥ 2 unique peptides | rmAC3071 | Q5UY65_HALMA       | <i>ilvE1</i>    | Branched-chain amino acid aminotransferase                                                 | 0  | 0  | 20 | 5  | 0  | 0  | 35 | 12 | 20 | 35 | 55 | 0.6 | No dramatic change | 0  | 55 | 0.0   | Soluble only        | 382 | 0  |
| ≥ 2 unique peptides | rmAC3353 | Q5UXG1_HALMA       | <i>noxA2</i>    | NADH oxidase                                                                               | 0  | 0  | 19 | 6  | 1  | 1  | 35 | 11 | 19 | 36 | 55 | 0.5 | No dramatic change | 1  | 54 | 1.8   | Soluble predominant | 416 | 0  |
| ≥ 2 unique peptides | rmB0272  | Q5UWB0_HALMA       | <i>rmB0272</i>  | Hypothetical protein                                                                       | 45 | 19 | 0  | 0  | 9  | 7  | 0  | 0  | 45 | 9  | 54 | 5.0 | 0.7 (>3X)          | 54 | 0  | 100.0 | Memb only           | 521 | 2  |
| ≥ 2 unique peptides | rmAC0830 | Q5V3U0_HALMA       | <i>rmAC0830</i> | Hypothetical protein                                                                       | 32 | 6  | 0  | 0  | 22 | 4  | 0  | 0  | 32 | 22 | 54 | 1.5 | No dramatic change | 54 | 0  | 100.0 | Memb only           | 458 | 0  |
| ≥ 2 unique peptides | rmAC2993 | Q5UYD0_HALMA       | <i>rmAC2993</i> | Hypothetical protein                                                                       | 1  | 1  | 25 | 8  | 3  | 2  | 25 | 8  | 26 | 28 | 54 | 0.9 | No dramatic change | 4  | 50 | 7.4   | Soluble predominant | 203 | 0  |
| ≥ 2 unique peptides | rmAC0160 | Q5V5H4_HALMA       | <i>rmAC0160</i> | Hypothetical protein                                                                       | 24 | 7  | 0  | 0  | 30 | 8  | 0  | 0  | 24 | 30 | 54 | 0.8 | No dramatic change | 54 | 0  | 100.0 | Memb only           | 227 | 0  |
| ≥ 2 unique peptides | rmAC2110 | Q5V0J2_HALMA       | <i>trxA3</i>    | Thioredoxin                                                                                | 0  | 0  | 26 | 6  | 0  | 0  | 27 | 7  | 26 | 27 | 53 | 1.0 | No dramatic change | 0  | 53 | 0.0   | Soluble only        | 88  | 0  |
| ≥ 2 unique peptides | rmAC0840 | Q5V3T0_HALMA       | <i>rmAC0840</i> | Hypothetical protein                                                                       | 30 | 6  | 0  | 0  | 23 | 5  | 0  | 0  | 30 | 23 | 53 | 1.3 | No dramatic change | 53 | 0  | 100.0 | Memb only           | 103 | 2  |
| ≥ 2 unique peptides | rmAC1173 | Q5V2X9_HALMA       | <i>rmAC1173</i> | Hypothetical protein                                                                       | 0  | 0  | 26 | 13 | 0  | 0  | 27 | 11 | 26 | 27 | 53 | 1.0 | No dramatic change | 0  | 53 | 0.0   | Soluble only        | 242 | 0  |
| ≥ 2 unique peptides | rmB0263  | Q5UWB9_HALMA       | <i>accC1</i>    | Carbamoyl phosphate synthase L chain                                                       | 0  | 0  | 32 | 12 | 0  | 0  | 21 | 8  | 32 | 21 | 53 | 1.5 | No dramatic change | 0  | 53 | 0.0   | Soluble only        | 594 | 0  |
| ≥ 2 unique peptides | rmAC0799 | Q5V3W6_HALMA       | <i>cdIM</i>     | Endoglucanase                                                                              | 0  | 0  | 25 | 8  | 0  | 0  | 28 | 9  | 25 | 28 | 53 | 0.9 | No dramatic change | 0  | 53 | 0.0   | Soluble only        | 355 | 0  |
| ≥ 2 unique peptides | rmAC2147 | Q5V0G2_HALMA       | <i>pstA1</i>    | Phosphate ABC transporter permease protein                                                 | 14 | 4  | 0  | 0  | 39 | 6  | 0  | 0  | 14 | 39 | 53 | 0.4 | 1.2 (2-3X)         | 53 | 0  | 100.0 | Memb only           | 884 | 24 |
| ≥ 2 unique peptides | rmAC2910 | Q5UYK2_HALMA       | <i>radA</i>     | DNA repair and recombination protein Rada                                                  | 1  | 1  | 24 | 8  | 0  | 0  | 27 | 10 | 25 | 27 | 52 | 0.9 | No dramatic change | 1  | 51 | 1.9   | Soluble predominant | 351 | 0  |
| ≥ 2 unique peptides | pNG3012  | Q5V7Y3_HALMA       | <i>pNG3012</i>  | Hypothetical protein                                                                       | 34 | 7  | 0  | 0  | 18 | 5  | 0  | 0  | 34 | 18 | 52 | 1.9 | No dramatic change | 52 | 0  | 100.0 | Memb only           | 373 | 0  |
| ≥ 2 unique peptides | rmAC1432 | Q5V293_HALMA       | <i>dpm5</i>     | Dolichyl-phosphate-mannose-protein mannosyltransferase (EC 2.4.1.-)(EC 2.4.1.109)          | 32 | 10 | 0  | 0  | 20 | 6  | 0  | 0  | 32 | 20 | 52 | 1.6 | No dramatic change | 52 | 0  | 100.0 | Memb only           | 665 | 10 |
| ≥ 2 unique peptides | rmAC0630 | Q5V4B4_HALMA       | <i>sppA</i>     | Putative signal peptide peptidase SppA (EC 3.4.21.-)                                       | 25 | 9  | 0  | 0  | 27 | 12 | 0  | 0  | 25 | 27 | 52 | 0.9 | No dramatic change | 52 | 0  | 100.0 | Memb only           | 331 | 1  |
| ≥ 2 unique peptides | rmB0306  | Q5UW82_HALMA       | <i>rmB0306</i>  | Hypothetical protein                                                                       | 0  | 0  | 40 | 13 | 0  | 0  | 11 | 5  | 40 | 11 | 51 | 3.6 | 0.7 (>3X)          | 0  | 51 | 0.0   | Soluble only        | 95  | 0  |
| ≥ 2 unique peptides | rmAC1448 | Q5V278_HALMA       | <i>nuoB</i>     | NADH dehydrogenase I B subunit                                                             | 27 | 9  | 0  | 0  | 24 | 9  | 0  | 0  | 27 | 24 | 51 | 1.1 | No dramatic change | 51 | 0  | 100.0 | Memb only           | 230 | 0  |
| ≥ 2 unique peptides | pNG7150  | Q5V6J4_HALMA       | <i>nosD1</i>    | Copper-binding protein                                                                     | 21 | 8  | 0  | 0  | 30 | 9  | 0  | 0  | 21 | 30 | 51 | 0.7 | No dramatic change | 51 | 0  | 100.0 | Memb only           | 637 | 1  |
| ≥ 2 unique peptides | rmAC1600 | RS4E_HALMARReview  | <i>rps4e</i>    | 30S ribosomal protein S4E (HS3)                                                            | 4  | 2  | 30 | 10 | 5  | 2  | 12 | 5  | 34 | 17 | 51 | 2.0 | 0.7 (2-3X)         | 9  | 42 | 17.6  | Soluble predominant | 234 | 0  |
| ≥ 2 unique peptides | rmAC1160 | Q5V2Z1_HALMA       | <i>rmAC1160</i> | Von Willebrand factor type A like metal binding protein                                    | 0  | 0  | 22 | 11 | 0  | 0  | 29 | 13 | 22 | 29 | 51 | 0.8 | No dramatic change | 0  | 51 | 0.0   | Soluble only        | 394 | 0  |
| ≥ 2 unique peptides | pNG5011  | Q5V7G9_HALMA       | <i>pNG5011</i>  | Hypothetical protein                                                                       | 33 | 13 | 0  | 0  | 17 | 9  | 0  | 0  | 33 | 17 | 50 | 1.9 | No dramatic change | 50 | 0  | 100.0 | Memb only           | 835 | 10 |
| ≥ 2 unique peptides | rmAC1572 | Q5V1W2_HALMA       | <i>rfbB2</i>    | DTDP-glucose-46-dehydratase (EC 4.2.1.46)                                                  | 1  | 1  | 26 | 8  | 1  | 1  | 22 | 8  | 27 | 23 | 50 | 1.2 | No dramatic change | 2  | 48 | 4.0   | Soluble predominant | 353 | 0  |
| ≥ 2 unique peptides | rmAC3303 | Q5UXK8_HALMA       | <i>ppiB1</i>    | Peptidyl-prolyl cis-trans isomerase slr1251 (EC 5.2.1.8)                                   | 2  | 1  | 23 | 6  | 5  | 2  | 20 | 6  | 25 | 25 | 50 | 1.0 | No dramatic change | 7  | 43 | 14.0  | Soluble predominant | 209 | 0  |
| ≥ 2 unique peptides | rmAC2502 | Q5UZJ6_HALMA       | <i>phzC</i>     | Phenazine biosynthesis-like protein                                                        | 0  | 0  | 25 | 8  | 1  | 1  | 24 | 9  | 25 | 25 | 50 | 1.0 | No dramatic change | 1  | 49 | 2.0   | Soluble predominant | 292 | 0  |
| ≥ 2 unique peptides | rmAC2364 | PGK_HALMARReview   | <i>pgk</i>      | Phosphoglycerate kinase (EC 2.7.2.3)                                                       | 0  | 0  | 18 | 5  | 3  | 1  | 29 | 13 | 18 | 32 | 50 | 0.6 | No dramatic change | 3  | 47 | 6.0   | Soluble predominant | 400 | 0  |
| ≥ 2 unique peptides | rmAC1790 | Q5V1C1_HALMA       | <i>hut1</i>     | Imidazolonepropionase (EC 3.5.2.7)                                                         | 0  | 0  | 15 | 7  | 0  | 0  | 35 | 11 | 15 | 35 | 50 | 0.4 | 1.2 (2-3X)         | 0  | 50 | 0.0   | Soluble only        | 420 | 0  |
| ≥ 2 unique peptides | rmAC1602 | RL14_HALMARReview  | <i>rpl14p</i>   | 50S ribosomal protein L14P (Hmal14) (H127)                                                 | 19 | 7  | 2  | 1  | 29 | 9  | 0  | 0  | 21 | 29 | 50 | 0.7 | No dramatic change | 48 | 2  | 96.0  | Memb predominant    | 132 | 0  |
| ≥ 2 unique peptides | rmAC0043 | Q5V5S7_HALMA       | <i>coxB1</i>    | Cytochrome c oxidase polypeptide II (EC 1.9.3.1)                                           | 24 | 7  | 0  | 0  | 25 | 7  | 0  | 0  | 24 | 25 | 49 | 1.0 | No dramatic change | 49 | 0  | 100.0 | Memb only           | 253 | 3  |
| ≥ 2 unique peptides | rmAC3510 | Q5UX24_HALMA       | <i>rmAC3510</i> | Hypothetical protein                                                                       | 0  | 0  | 25 | 7  | 1  | 1  | 23 | 7  | 25 | 24 | 49 | 1.0 | No dramatic change | 1  | 48 | 2.0   | Soluble predominant | 252 | 0  |
| ≥ 2 unique peptides | rmAC3169 | SYR_HALMARReview   | <i>argS</i>     | Arginyl-tRNA synthetase (EC 6.1.1.19) (Arginine-tRNA ligase) (ArgRS)                       | 0  | 0  | 25 | 16 | 0  | 0  | 24 | 11 | 25 | 24 | 49 | 1.0 | No dramatic change | 0  | 49 | 0.0   | Soluble only        | 579 | 0  |
| ≥ 2 unique peptides | rmAC3008 | Q5UYB9_HALMA       | <i>cbiH</i>     | Precorrin-3B C17-methyltransferase (EC 2.1.1.131)                                          | 6  | 2  | 18 | 3  | 0  | 0  | 25 | 5  | 24 | 25 | 49 | 1.0 | No dramatic change | 6  | 43 | 12.2  | Soluble predominant | 240 | 0  |
| ≥ 2 unique peptides | rmAC3323 | Q5UXJ0_HALMA       | <i>ipp</i>      | Inorganic pyrophosphatase (EC 3.6.1.1)                                                     | 0  | 0  | 18 | 9  | 0  | 0  | 31 | 13 | 18 | 31 | 49 | 0.6 | No dramatic change | 0  | 49 | 0.0   | Soluble only        | 177 | 0  |
| ≥ 2 unique peptides | pNG7293  | Q5V663_HALMA       | <i>yafB</i>     | Aldehyde reductase                                                                         | 0  | 0  | 18 | 6  | 0  | 0  | 31 | 10 | 18 | 31 | 49 | 0.6 | No dramatic change | 0  | 49 | 0.0   | Soluble only        | 279 | 0  |
| ≥ 2 unique peptides | pNG7366  | Q5V5Z4_HALMA       | <i>gcvT3</i>    | Sacrosine dehydrogenase/glycine cleavage T-protein (EC 1.5.3.1)(EC 2.1.2.10)               | 0  | 0  | 9  | 5  | 0  | 0  | 40 | 19 | 9  | 40 | 49 | 0.2 | 1.2 (>3X)          | 0  | 49 | 0.0   | Soluble only        | 857 | 0  |
| ≥ 2 unique peptides | rmAC2498 | Q5UZK1_HALMA       | <i>trkA6</i>    | TRK potassium uptake system protein                                                        | 0  | 0  | 20 | 6  | 0  | 0  | 29 | 7  | 20 | 29 | 49 | 0.7 | No dramatic change | 0  | 49 | 0.0   | Soluble only        | 221 | 0  |
| ≥ 2 unique peptides | rmAC0915 | Q5V3L2_HALMA       | <i>rmAC0915</i> | Hypothetical protein                                                                       | 29 | 8  | 0  | 0  | 19 | 5  | 0  | 0  | 29 | 19 | 48 | 1.5 | No dramatic change | 48 | 0  | 100.0 | Memb only           | 458 | 0  |
| ≥ 2 unique peptides | rmAC3162 | Q5UXY5_HALMA       | <i>atpD</i>     | V-type ATP synthase subunit D (EC 3.6.3.14)                                                | 0  | 0  | 32 | 14 | 5  | 1  | 11 | 7  | 32 | 16 | 48 | 2.0 | 0.7 (2-3X)         | 5  | 43 | 10.4  | Soluble predominant | 230 | 0  |
| ≥ 2 unique peptides | rmAC2577 | UPP_HALMARReview   | <i>upp</i>      | Probable uracil phosphoribosyltransferase (EC 2.4.2.9) (UMPpyrophosphorylase) (UPRTase)    | 3  | 2  | 26 | 11 | 0  | 0  | 19 | 8  | 29 | 19 | 48 | 1.5 | No dramatic change | 3  | 45 | 6.3   | Soluble predominant | 225 | 0  |
| ≥ 2 unique peptides | rmAC0204 | Q5V5D7_HALMA       | <i>dapD</i>     | 2,3,4,5-tetrahydropyridine-2-carboxylate N-succinyltransferase(EC 2.3.1.117)               | 0  | 0  | 27 | 8  | 0  | 0  | 21 | 9  | 27 | 21 | 48 | 1.3 | No dramatic change | 0  | 48 | 0.0   | Soluble only        | 276 | 0  |
| ≥ 2 unique peptides | pNG7017  | Q5V6W1_HALMA       | <i>pNG7017</i>  | 4Fe-S protein                                                                              | 18 | 9  | 0  | 0  | 30 | 12 | 0  | 0  | 18 | 30 | 48 | 0.6 | No dramatic change | 48 | 0  | 100.0 | Memb only           | 726 | 0  |
| ≥ 2 unique peptides | rmAC3402 | Q5UXC0_HALMA       | <i>rmAC3402</i> | Hypothetical protein                                                                       | 1  | 1  | 30 | 7  | 2  | 1  | 14 | 5  | 31 | 16 | 47 | 1.9 | No dramatic change | 3  | 44 | 6.4   | Soluble predominant | 166 | 0  |
| ≥ 2 unique peptides | rmAC0899 | Q5V3M6_HALMA       | <i>rmAC0899</i> | Hypothetical protein                                                                       | 27 | 10 | 0  | 0  | 20 | 9  | 0  | 0  | 27 | 20 | 47 | 1.4 | No dramatic change | 47 | 0  | 100.0 | Memb only           | 388 | 0  |
| ≥ 2 unique peptides | rmAC2969 | PYRD_HALMARReview  | <i>pyrD</i>     | Dihydroorotate dehydrogenase (EC 1.3.3.1) (Dihydroorotate oxidase)(DHODase) (DHODase)      | 32 | 9  | 0  | 0  | 15 | 7  | 0  | 0  | 32 | 15 | 47 | 2.1 | 0.7 (2-3X)         | 47 | 0  | 100.0 | Memb only           | 350 | 0  |
| ≥ 2 unique peptides | rmAC3472 | GUAAB_HALMARReview | <i>guaAB</i>    | GMP synthase [glutamine-hydrolyzing] subunit B (EC 6.3.5.2) (GMPsynthetase)                | 0  | 0  | 27 | 10 | 0  | 0  | 20 | 10 | 27 | 20 | 47 | 1.4 | No dramatic change | 0  | 47 | 0.0   | Soluble only        | 305 | 0  |
| ≥ 2 unique peptides | rmAC1450 | Q5V276_HALMA       | <i>ndhG4</i>    | NADH dehydrogenase/oxidoreductase                                                          | 25 | 4  | 0  | 0  | 22 | 5  | 0  | 0  | 25 | 22 | 47 | 1.1 | No dramatic change | 47 | 0  | 100.0 | Memb only           | 347 | 9  |
| ≥ 2 unique peptides | rmAC0069 | ENO_HALMARReview   | <i>eno</i>      | Enolase (EC 4.2.1.11) (2-phosphoglycerate dehydratase) (2-phospho-D-glycerate hydro-lyase) | 0  | 0  | 24 | 8  | 0  | 0  | 23 | 9  | 24 | 23 | 47 | 1.0 | No dramatic change | 0  | 47 | 0.0   | Soluble only        | 401 | 0  |
| ≥ 2 unique peptides | rmAC3546 | Q5UWZ1_HALMA       | <i>pan2</i>     | Proteasome-activating nucleotidase 2                                                       | 0  | 0  | 21 | 11 | 1  | 1  | 25 | 10 | 21 | 26 | 47 | 0.8 | No dramatic change | 1  | 46 | 2.1   | Soluble predominant | 404 | 0  |
| ≥ 2 unique peptides | rmAC3289 | Q5UXM0_HALMA       | <i>trkA3</i>    | TRK potassium uptake system protein                                                        | 0  | 0  | 24 | 10 | 2  | 1  | 21 | 9  | 24 | 23 | 47 | 1.0 | No dramatic change | 2  | 45 | 4.3   | Soluble predominant | 228 | 0  |
| ≥ 2 unique peptides | rmAC1393 | Q5V2D0_HALMA       | <i>rmAC1393</i> | Hypothetical protein                                                                       | 22 | 3  | 0  | 0  | 24 | 3  | 0  | 0  | 22 | 24 | 46 | 0.9 | No dramatic change | 46 | 0  | 100.0 | Memb only           | 80  | 1  |
| ≥ 2 unique peptides | rmAC0325 | Q5V527_HALMA       | <i>rmAC0325</i> | Hypothetical protein                                                                       | 18 | 5  | 2  | 1  | 22 | 7  | 4  | 2  | 20 | 26 | 46 | 0.8 | No dramatic change | 40 | 6  | 87.0  | Memb predominant    | 226 | 0  |

|                     |          |                    |                  |                                                                                                                           |    |    |    |    |    |    |    |    |    |    |    |     |                    |    |    |       |                     |     |    |
|---------------------|----------|--------------------|------------------|---------------------------------------------------------------------------------------------------------------------------|----|----|----|----|----|----|----|----|----|----|----|-----|--------------------|----|----|-------|---------------------|-----|----|
| ≥ 2 unique peptides | rmAC0896 | Q5V3M8_HALMA       | <i>acaB3</i>     | 3-ketoacyl-CoA thiolase (EC 2.3.1.9)                                                                                      | 0  | 0  | 30 | 8  | 0  | 0  | 16 | 10 | 30 | 16 | 46 | 1.9 | No dramatic change | 0  | 46 | 0.0   | Soluble only        | 430 | 0  |
| ≥ 2 unique peptides | rmAC3495 | Q5UX36_HALMA       | <i>aspB2</i>     | Aspartate aminotransferase (EC 2.6.1.1)                                                                                   | 0  | 0  | 26 | 5  | 1  | 1  | 19 | 5  | 26 | 20 | 46 | 1.3 | No dramatic change | 1  | 45 | 2.2   | Soluble predominant | 373 | 0  |
| ≥ 2 unique peptides | rmAC0227 | Q5V5B6_HALMA       | <i>ocd3</i>      | Ornithine cyclodeaminase (EC 4.3.1.12)                                                                                    | 0  | 0  | 21 | 9  | 0  | 0  | 24 | 9  | 21 | 24 | 45 | 0.9 | No dramatic change | 0  | 45 | 0.0   | Soluble only        | 337 | 0  |
| ≥ 2 unique peptides | rmAC1441 | Q5V285_HALMA       | <i>recJ3</i>     | Putative exonuclease recJ-like                                                                                            | 0  | 0  | 19 | 9  | 1  | 1  | 24 | 14 | 19 | 25 | 44 | 0.8 | No dramatic change | 1  | 43 | 2.3   | Soluble predominant | 637 | 0  |
| ≥ 2 unique peptides | rmAC1800 | SYM_HALMAReview    | <i>metG</i>      | Methionyl-tRNA synthetase (EC 6.1.1.10) (Methionine-tRNA ligase)(MetRS)                                                   | 0  | 0  | 24 | 9  | 0  | 0  | 20 | 10 | 24 | 20 | 44 | 1.2 | No dramatic change | 0  | 44 | 0.0   | Soluble only        | 717 | 0  |
| ≥ 2 unique peptides | rmAC2837 | Q5UYR3_HALMA       | <i>trzA3</i>     | N-ethylammine chlorohydrolase                                                                                             | 0  | 0  | 23 | 6  | 0  | 0  | 21 | 8  | 23 | 21 | 44 | 1.1 | No dramatic change | 0  | 44 | 0.0   | Soluble only        | 432 | 0  |
| ≥ 2 unique peptides | rmAC3424 | Q5UX99_HALMA       | <i>rrmAC3424</i> | Rieske [2Fe-2S] domain protein                                                                                            | 17 | 5  | 0  | 0  | 27 | 6  | 0  | 0  | 17 | 27 | 44 | 0.6 | No dramatic change | 44 | 0  | 100.0 | Mem only            | 295 | 0  |
| ≥ 2 unique peptides | rmAC0070 | RS2_HALMARReview   | <i>rps2p</i>     | 30S ribosomal protein S2P (HS2) (ORFMSG)                                                                                  | 0  | 0  | 26 | 10 | 0  | 0  | 18 | 9  | 26 | 18 | 44 | 1.4 | No dramatic change | 0  | 44 | 0.0   | Soluble only        | 267 | 0  |
| ≥ 2 unique peptides | rmAC0004 | Q5V5W2_HALMA       | <i>accA</i>      | Acetyl-CoA carboxylase alpha subunit                                                                                      | 0  | 0  | 23 | 8  | 1  | 1  | 19 | 8  | 23 | 20 | 43 | 1.2 | No dramatic change | 1  | 42 | 2.3   | Soluble predominant | 451 | 0  |
| ≥ 2 unique peptides | rmAC0444 | Q5V4S4_HALMA       | <i>manB2</i>     | Phosphoglucomutase/phosphomannomutase (EC 5.4.2.2) (EC 5.4.2.8)                                                           | 0  | 0  | 18 | 9  | 0  | 0  | 25 | 13 | 18 | 25 | 43 | 0.7 | No dramatic change | 0  | 43 | 0.0   | Soluble only        | 455 | 0  |
| ≥ 2 unique peptides | rmAC2696 | Q5UZ36_HALMA       | <i>serA1</i>     | D-3-phosphoglycerate dehydrogenase (EC 1.1.1.95)                                                                          | 0  | 0  | 17 | 8  | 0  | 0  | 26 | 12 | 17 | 26 | 43 | 0.7 | No dramatic change | 0  | 43 | 0.0   | Soluble only        | 528 | 0  |
| ≥ 2 unique peptides | rmB0320  | PHNC2_HALMARReview | <i>phnC2</i>     | Phosphonates import ATP-binding protein phnC2 (EC 3.6.3.28)                                                               | 33 | 12 | 1  | 1  | 9  | 6  | 0  | 0  | 34 | 9  | 43 | 3.8 | 0.7 (>3X)          | 42 | 1  | 97.7  | Mem predominant     | 271 | 0  |
| ≥ 2 unique peptides | rmAC0703 | Q5V453_HALMA       | <i>ftsZ1</i>     | Cell division protein FtsZ                                                                                                | 4  | 2  | 15 | 5  | 5  | 3  | 18 | 5  | 19 | 23 | 42 | 0.8 | No dramatic change | 9  | 33 | 21.4  | Soluble predominant | 386 | 0  |
| ≥ 2 unique peptides | rmAC0535 | Q5V4J9_HALMA       | <i>rrmAC0535</i> | HTH DNA-binding protein                                                                                                   | 0  | 0  | 16 | 5  | 0  | 0  | 26 | 10 | 16 | 26 | 42 | 0.6 | No dramatic change | 0  | 42 | 0.0   | Soluble only        | 175 | 0  |
| ≥ 2 unique peptides | rmAC2885 | Q5UYM1_HALMA       | <i>rrmAC2885</i> | Hypothetical protein                                                                                                      | 25 | 6  | 0  | 0  | 17 | 5  | 0  | 0  | 25 | 17 | 42 | 1.5 | No dramatic change | 42 | 0  | 100.0 | Mem only            | 181 | 0  |
| ≥ 2 unique peptides | rmAC2308 | Q5V021_HALMA       | <i>rrmAC2308</i> | Hypothetical protein                                                                                                      | 0  | 0  | 24 | 7  | 0  | 0  | 18 | 6  | 24 | 18 | 42 | 1.3 | No dramatic change | 0  | 42 | 0.0   | Soluble only        | 148 | 0  |
| ≥ 2 unique peptides | pNG7158  | Q5V616_HALMA       | <i>pNG7158</i>   | Hypothetical protein                                                                                                      | 0  | 0  | 19 | 8  | 0  | 0  | 23 | 7  | 19 | 23 | 42 | 0.8 | No dramatic change | 0  | 42 | 0.0   | Soluble only        | 47  | 0  |
| ≥ 2 unique peptides | rmAC2683 | ASSY_HALMARReview  | <i>argG</i>      | Argininosuccinate synthase (EC 6.3.4.5) (Citrulline-aspartate ligase)                                                     | 0  | 0  | 20 | 9  | 0  | 0  | 22 | 12 | 20 | 22 | 42 | 0.9 | No dramatic change | 0  | 42 | 0.0   | Soluble only        | 420 | 0  |
| ≥ 2 unique peptides | rmAC2811 | Q5UYT6_HALMA       | <i>mhK</i>       | Potassium channel related protein                                                                                         | 21 | 11 | 0  | 0  | 21 | 10 | 0  | 0  | 21 | 21 | 42 | 1.0 | No dramatic change | 42 | 0  | 100.0 | Mem only            | 375 | 4  |
| ≥ 2 unique peptides | rmAC1528 | Q5V204_HALMA       | <i>rrmAC1528</i> | Hypothetical protein                                                                                                      | 0  | 0  | 18 | 6  | 0  | 0  | 23 | 8  | 18 | 23 | 41 | 0.8 | No dramatic change | 0  | 41 | 0.0   | Soluble only        | 138 | 0  |
| ≥ 2 unique peptides | rmAC3471 | PYRG_HALMARReview  | <i>pyrG</i>      | CTP synthase (EC 6.3.4.2) (UTP--ammonia ligase) (CTP synthetase)                                                          | 0  | 0  | 24 | 9  | 0  | 0  | 17 | 8  | 24 | 17 | 41 | 1.4 | No dramatic change | 0  | 41 | 0.0   | Soluble only        | 553 | 0  |
| ≥ 2 unique peptides | rmAC0874 | Q5V3P9_HALMA       | <i>acdA</i>      | Acyl-CoA dehydrogenase (EC 1.3.99.-)                                                                                      | 0  | 0  | 20 | 9  | 0  | 0  | 21 | 9  | 20 | 21 | 41 | 1.0 | No dramatic change | 0  | 41 | 0.0   | Soluble only        | 375 | 0  |
| ≥ 2 unique peptides | rmAC2638 | Q5UZ82_HALMA       | <i>hit2</i>      | Histidine triad protein                                                                                                   | 0  | 0  | 19 | 5  | 2  | 2  | 20 | 5  | 19 | 22 | 41 | 0.9 | No dramatic change | 2  | 39 | 4.9   | Soluble predominant | 142 | 0  |
| ≥ 2 unique peptides | rmAC1434 | Q5V291_HALMA       | <i>aspC3</i>     | Aspartate aminotransferase (EC 2.6.1.1)                                                                                   | 0  | 0  | 10 | 6  | 0  | 0  | 31 | 9  | 10 | 31 | 41 | 0.3 | 1.2 (>3X)          | 0  | 41 | 0.0   | Soluble only        | 386 | 0  |
| ≥ 2 unique peptides | rmAC1608 | RL2_HALMARReview   | <i>rpl2p</i>     | 50S ribosomal protein L2P (Hmal2) (H14)                                                                                   | 22 | 6  | 2  | 1  | 16 | 6  | 1  | 1  | 24 | 17 | 41 | 1.4 | No dramatic change | 38 | 3  | 92.7  | Mem predominant     | 240 | 0  |
| ≥ 2 unique peptides | rmAC3052 | Q5UY82_HALMA       | <i>nosY2</i>     | ABC-type transport system involved in multi-copper enzyme maturationpermease component                                    | 24 | 8  | 0  | 0  | 17 | 7  | 0  | 0  | 24 | 17 | 41 | 1.4 | No dramatic change | 41 | 0  | 100.0 | Mem only            | 334 | 6  |
| ≥ 2 unique peptides | rmAC2528 | Q5UZH2_HALMA       | <i>rrmAC2528</i> | Hypothetical protein                                                                                                      | 14 | 6  | 0  | 0  | 26 | 9  | 0  | 0  | 14 | 26 | 40 | 0.5 | No dramatic change | 40 | 0  | 100.0 | Mem only            | 306 | 2  |
| ≥ 2 unique peptides | rmAC0677 | Q5V473_HALMA       | <i>yusZ4</i>     | Short-chain dehydrogenase/oxidoreductase                                                                                  | 24 | 6  | 0  | 0  | 16 | 5  | 0  | 0  | 24 | 16 | 40 | 1.5 | No dramatic change | 40 | 0  | 100.0 | Mem only            | 274 | 0  |
| ≥ 2 unique peptides | rmAC0904 | Q5V3M2_HALMA       | <i>fabG1</i>     | 3-oxoacyl-[acyl-carrier protein] reductase (EC 1.1.1.100)                                                                 | 0  | 0  | 22 | 7  | 0  | 0  | 18 | 10 | 22 | 18 | 40 | 1.2 | No dramatic change | 0  | 40 | 0.0   | Soluble only        | 247 | 0  |
| ≥ 2 unique peptides | rmAC3159 | Q5UZ65_HALMA       | <i>rrmAC2659</i> | Hypothetical protein                                                                                                      | 0  | 0  | 18 | 8  | 0  | 0  | 22 | 9  | 18 | 22 | 40 | 0.8 | No dramatic change | 0  | 40 | 0.0   | Soluble only        | 202 | 0  |
| ≥ 2 unique peptides | rmAC1962 | Q5V0X3_HALMA       | <i>malA</i>      | Putative alpha-D-14-glucosidase                                                                                           | 0  | 0  | 8  | 5  | 0  | 0  | 32 | 15 | 8  | 32 | 40 | 0.3 | 1.2 (>3X)          | 0  | 40 | 0.0   | Soluble only        | 663 | 0  |
| ≥ 2 unique peptides | rmAC0550 | GLPK_HALMARReview  | <i>glpK</i>      | Glycerol kinase (EC 2.7.1.30) (ATP:glycerol 3-phosphotransferase)(Glycerokinase) (GK)                                     | 0  | 0  | 8  | 2  | 0  | 0  | 32 | 10 | 8  | 32 | 40 | 0.3 | 1.2 (>3X)          | 0  | 40 | 0.0   | Soluble only        | 510 | 0  |
| ≥ 2 unique peptides | rmAC3395 | Q5UXC7_HALMA       | <i>usp24</i>     | Universal stress protein family                                                                                           | 10 | 2  | 0  | 0  | 24 | 3  | 6  | 3  | 10 | 30 | 40 | 0.3 | 1.2 (>3X)          | 34 | 6  | 85.0  | Mem predominant     | 146 | 0  |
| ≥ 2 unique peptides | rmAC3344 | Q5UXG9_HALMA       | <i>htrB</i>      | HTR-like protein                                                                                                          | 22 | 6  | 0  | 0  | 17 | 4  | 0  | 0  | 22 | 17 | 39 | 1.3 | No dramatic change | 39 | 0  | 100.0 | Mem only            | 296 | 4  |
| ≥ 2 unique peptides | rmAC1308 | Q5V2K9_HALMA       | <i>rrmAC1308</i> | Glutaredoxin                                                                                                              | 0  | 0  | 20 | 7  | 0  | 0  | 19 | 5  | 20 | 19 | 39 | 1.1 | No dramatic change | 0  | 39 | 0.0   | Soluble only        | 132 | 0  |
| ≥ 2 unique peptides | rmAC2520 | Q5UZIO_HALMA       | <i>gstN</i>      | Glutathione S-transferase N-terminal domain                                                                               | 1  | 1  | 18 | 4  | 3  | 1  | 17 | 4  | 19 | 20 | 39 | 1.0 | No dramatic change | 4  | 35 | 10.3  | Soluble predominant | 82  | 0  |
| ≥ 2 unique peptides | rmAC0931 | Q5V3J7_HALMA       | <i>rrmAC0931</i> | Hypothetical protein                                                                                                      | 28 | 8  | 0  | 0  | 10 | 6  | 1  | 1  | 28 | 11 | 39 | 2.5 | 0.7 (>3X)          | 38 | 1  | 97.4  | Mem predominant     | 313 | 0  |
| ≥ 2 unique peptides | rmAC3016 | Q5UYB1_HALMA       | <i>rrmAC3016</i> | Hypothetical protein                                                                                                      | 26 | 3  | 0  | 0  | 13 | 2  | 0  | 0  | 26 | 13 | 39 | 2.0 | 0.7 (>3X)          | 39 | 0  | 100.0 | Mem only            | 68  | 1  |
| ≥ 2 unique peptides | rmAC1898 | Q5V129_HALMA       | <i>rrmAC1898</i> | Hypothetical protein                                                                                                      | 19 | 9  | 0  | 0  | 20 | 8  | 0  | 0  | 19 | 20 | 39 | 1.0 | No dramatic change | 39 | 0  | 100.0 | Mem only            | 459 | 4  |
| ≥ 2 unique peptides | rmAC1456 | Q5V270_HALMA       | <i>ndhD</i>      | NADH dehydrogenase subunit 4                                                                                              | 22 | 3  | 0  | 0  | 17 | 4  | 0  | 0  | 22 | 17 | 39 | 1.3 | No dramatic change | 39 | 0  | 100.0 | Mem only            | 511 | 14 |
| ≥ 2 unique peptides | rmAC1982 | Q5V0V6_HALMA       | <i>hbd2</i>      | 3-hydroxybutyryl-CoA dehydrogenase (EC 1.1.1.35) (EC 4.2.1.17)                                                            | 0  | 0  | 17 | 4  | 0  | 0  | 22 | 6  | 17 | 22 | 39 | 0.8 | No dramatic change | 0  | 39 | 0.0   | Soluble only        | 654 | 0  |
| ≥ 2 unique peptides | rmAC0106 | NDK_HALMARReview   | <i>ndk</i>       | Nucleoside diphosphate kinase (EC 2.7.4.6) (NDK) (NDP kinase)(Nucleoside-2-P kinase)                                      | 0  | 0  | 17 | 5  | 0  | 0  | 22 | 4  | 17 | 22 | 39 | 0.8 | No dramatic change | 0  | 39 | 0.0   | Soluble only        | 154 | 0  |
| ≥ 2 unique peptides | rmAC3460 | Q5UX67_HALMA       | <i>usp26</i>     | Universal stress protein                                                                                                  | 0  | 0  | 16 | 6  | 0  | 0  | 23 | 8  | 16 | 23 | 39 | 0.7 | No dramatic change | 0  | 39 | 0.0   | Soluble only        | 143 | 0  |
| ≥ 2 unique peptides | rmAC0252 | Q5V593_HALMA       | <i>abcS-2</i>    | ABC transporter permease protein                                                                                          | 22 | 9  | 0  | 0  | 17 | 7  | 0  | 0  | 22 | 17 | 39 | 1.3 | No dramatic change | 39 | 0  | 100.0 | Mem only            | 377 | 4  |
| ≥ 2 unique peptides | rmAC0743 | Q5V416_HALMA       | <i>rrmAC0743</i> | Putative PRC-barrel domain                                                                                                | 0  | 0  | 16 | 5  | 1  | 1  | 22 | 7  | 16 | 23 | 39 | 0.7 | No dramatic change | 1  | 38 | 2.6   | Soluble predominant | 101 | 0  |
| ≥ 2 unique peptides | rmAC2427 | Q5UZR5_HALMA       | <i>rpoC</i>      | RNA polymerase Rpb1 domain 5 (EC 2.7.7.6)                                                                                 | 10 | 6  | 12 | 6  | 3  | 2  | 13 | 7  | 22 | 16 | 38 | 1.4 | No dramatic change | 13 | 25 | 34.2  | Mem + Sol           | 395 | 0  |
| ≥ 2 unique peptides | rmAC1118 | Q5V327_HALMA       | <i>hlx1</i>      | HoxA-like transcriptional regulator                                                                                       | 0  | 0  | 17 | 8  | 0  | 0  | 21 | 10 | 17 | 21 | 38 | 0.8 | No dramatic change | 0  | 38 | 0.0   | Soluble only        | 194 | 0  |
| ≥ 2 unique peptides | rmB0013  | Q5UWX6_HALMA       | <i>rrmB0013</i>  | Hypothetical protein                                                                                                      | 34 | 15 | 0  | 0  | 4  | 3  | 0  | 0  | 34 | 4  | 38 | 8.5 | 0.7 (>3X)          | 38 | 0  | 100.0 | Mem only            | 420 | 0  |
| ≥ 2 unique peptides | rmAC0258 | Q5V587_HALMA       | <i>rrmAC0258</i> | Hypothetical protein                                                                                                      | 0  | 0  | 25 | 10 | 2  | 2  | 11 | 6  | 25 | 13 | 38 | 1.9 | No dramatic change | 2  | 36 | 5.3   | Soluble predominant | 190 | 0  |
| ≥ 2 unique peptides | rmAC2469 | Q5UZM8_HALMA       | <i>rrmAC2469</i> | Hypothetical protein                                                                                                      | 21 | 2  | 0  | 0  | 17 | 2  | 0  | 0  | 21 | 17 | 38 | 1.2 | No dramatic change | 38 | 0  | 100.0 | Mem only            | 473 | 0  |
| ≥ 2 unique peptides | rmAC2971 | Q5UYE9_HALMA       | <i>rrmAC2971</i> | Hypothetical protein                                                                                                      | 0  | 0  | 9  | 5  | 1  | 1  | 28 | 7  | 9  | 29 | 38 | 0.3 | 1.2 (>3X)          | 1  | 37 | 2.6   | Soluble predominant | 116 | 0  |
| ≥ 2 unique peptides | rmAC2262 | G3P_HALMARReview   | <i>gap</i>       | Glyceraldehyde-3-phosphate dehydrogenase (EC 1.2.1.59) (GAPDH)(NAD(P)-dependent glyceraldehyde-3-phosphate dehydrogenase) | 12 | 6  | 7  | 4  | 5  | 4  | 14 | 6  | 19 | 19 | 38 | 1.0 | No dramatic change | 17 | 21 | 44.7  | Mem + Sol           | 354 | 0  |
| ≥ 2 unique peptides | rmAC0134 | Q5V5J6_HALMA       | <i>ilvB1</i>     | Acetolactate synthase large subunit (EC 2.2.1.6)                                                                          | 1  | 1  | 15 | 6  | 0  | 0  | 22 | 10 | 16 | 22 | 38 | 0.7 | No dramatic change | 1  | 37 | 2.6   | Soluble predominant | 549 | 0  |
| ≥ 2 unique peptides | rmAC0575 | Q5V4G3_HALMA       | <i>dgoA4</i>     | Mandelate racemase/muconate lactonizing enzyme family                                                                     | 0  | 0  | 9  | 6  | 0  | 0  | 29 | 8  | 9  | 29 | 38 | 0.3 | 1.2 (>3X)          | 0  | 38 | 0.0   | Soluble only        | 416 | 0  |
| ≥ 2 unique peptides | rmAC1867 | Q5V154_HALMA       | <i>rrmAC1867</i> | Putative Hsp20                                                                                                            | 6  | 1  | 10 | 5  | 14 | 5  | 8  | 4  | 16 | 22 | 38 | 0.7 | No dramatic change | 20 | 18 | 52.6  | Mem + Sol           | 251 | 0  |



|                     |          |                    |                  |                                                                                                                                                               |    |   |    |    |    |    |    |    |    |    |    |     |                    |    |    |       |                     |     |    |
|---------------------|----------|--------------------|------------------|---------------------------------------------------------------------------------------------------------------------------------------------------------------|----|---|----|----|----|----|----|----|----|----|----|-----|--------------------|----|----|-------|---------------------|-----|----|
| ≥ 2 unique peptides | rmAC2474 | IF1A_HALMARReview  | <i>efl1a</i>     | Translation initiation factor 1A (aIF-1A)                                                                                                                     | 1  | 1 | 18 | 3  | 2  | 2  | 17 | 3  | 19 | 19 | 38 | 1.0 | No dramatic change | 3  | 35 | 7.9   | Soluble predominant | 95  | 0  |
| ≥ 2 unique peptides | rmAC1590 | RL15_HALMARReview  | <i>rpl15p</i>    | 50S ribosomal protein L15P (Hmal15) (H19)                                                                                                                     | 5  | 4 | 5  | 3  | 28 | 11 | 0  | 0  | 10 | 28 | 38 | 0.4 | 1.2 (2-3X)         | 33 | 5  | 86.8  | Memb predominant    | 165 | 0  |
| ≥ 2 unique peptides | rmAC3298 | QSUXL2_HALMA       | <i>dppB</i>      | Dipeptide ABC transporter permease                                                                                                                            | 20 | 5 | 0  | 0  | 18 | 4  | 0  | 0  | 20 | 18 | 38 | 1.1 | No dramatic change | 38 | 0  | 100.0 | Memb only           | 346 | 6  |
| ≥ 2 unique peptides | rmAC0259 | Q5V586_HALMA       | <i>rpb4</i>      | RNA polymerase Rpb4                                                                                                                                           | 0  | 0 | 20 | 6  | 1  | 1  | 16 | 6  | 20 | 17 | 37 | 1.2 | No dramatic change | 1  | 36 | 2.7   | Soluble predominant | 118 | 0  |
| ≥ 2 unique peptides | pNG6093  | Q5V751_HALMA       | <i>pNG6093</i>   | Hypothetical protein                                                                                                                                          | 0  | 0 | 21 | 5  | 0  | 0  | 16 | 5  | 21 | 16 | 37 | 1.3 | No dramatic change | 0  | 37 | 0.0   | Soluble only        | 55  | 0  |
| ≥ 2 unique peptides | rmAC0166 | SYP_HALMARReview   | <i>proS</i>      | Prolyl-tRNA synthetase (EC 6.1.1.15) (Proline--tRNA ligase) (ProRS)                                                                                           | 0  | 0 | 19 | 7  | 0  | 0  | 18 | 9  | 19 | 18 | 37 | 1.1 | No dramatic change | 0  | 37 | 0.0   | Soluble only        | 484 | 0  |
| ≥ 2 unique peptides | rmAC0887 | Q5V3N7_HALMA       | <i>cbiA1</i>     | Cobyrinic acid ac-diamide synthase                                                                                                                            | 0  | 0 | 19 | 9  | 0  | 0  | 18 | 5  | 19 | 18 | 37 | 1.1 | No dramatic change | 0  | 37 | 0.0   | Soluble only        | 358 | 0  |
| ≥ 2 unique peptides | rmAC3210 | G6PI_HALMARReview  | <i>pgi</i>       | Probable glucose-6-phosphate isomerase (EC 5.3.1.9) (GPI)(Phosphoglucose isomerase) (PGI) (Phosphohexose isomerase) (PHI)                                     | 0  | 0 | 18 | 8  | 0  | 0  | 19 | 8  | 18 | 19 | 37 | 0.9 | No dramatic change | 0  | 37 | 0.0   | Soluble only        | 436 | 0  |
| ≥ 2 unique peptides | rmAC0772 | Q5V3Z1_HALMA       | <i>fbp2</i>      | Fructose-16-bisphosphatase (EC 3.1.3.11)                                                                                                                      | 0  | 0 | 18 | 8  | 0  | 0  | 19 | 8  | 18 | 19 | 37 | 0.9 | No dramatic change | 0  | 37 | 0.0   | Soluble only        | 291 | 0  |
| ≥ 2 unique peptides | rmAC3179 | RS19E_HALMARReview | <i>rps19e</i>    | 30S ribosomal protein S19e (HS12) (E1.3)                                                                                                                      | 2  | 1 | 20 | 7  | 3  | 2  | 12 | 5  | 22 | 15 | 37 | 1.5 | No dramatic change | 5  | 32 | 13.5  | Soluble predominant | 153 | 0  |
| ≥ 2 unique peptides | rmAC2146 | PSTB2_HALMARReview | <i>pstB2</i>     | Phosphate import ATP-binding protein pstB 2 (EC 3.6.3.27) (Phosphate-transporting ATPase 2) (ABC phosphate transporter 2)                                     | 0  | 0 | 0  | 0  | 37 | 13 | 0  | 0  | 0  | 37 | 37 | 0.0 | 1.2 only           | 37 | 0  | 100.0 | Memb only           | 313 | 0  |
| ≥ 2 unique peptides | rmAC2267 | Q5V057_HALMA       | <i>uvrD</i>      | Repair helicase                                                                                                                                               | 2  | 1 | 25 | 12 | 0  | 0  | 9  | 5  | 27 | 9  | 36 | 3.0 | 0.7 (>3X)          | 2  | 34 | 5.6   | Soluble predominant | 613 | 0  |
| ≥ 2 unique peptides | rmAC0991 | Q5V3E3_HALMA       | <i>htlD</i>      | Sensor protein (EC 2.7.13.3)                                                                                                                                  | 19 | 9 | 0  | 0  | 17 | 7  | 0  | 0  | 19 | 17 | 36 | 1.1 | No dramatic change | 36 | 0  | 100.0 | Memb only           | 644 | 5  |
| ≥ 2 unique peptides | pNG4051  | Q5V7X1_HALMA       | <i>pNG4051</i>   | Putative helicase                                                                                                                                             | 1  | 1 | 14 | 8  | 1  | 1  | 20 | 13 | 15 | 21 | 36 | 0.7 | No dramatic change | 2  | 34 | 5.6   | Soluble predominant | 893 | 0  |
| ≥ 2 unique peptides | rmAC3530 | QSUX06_HALMA       | <i>nuoL1</i>     | NADH dehydrogenase I L subunit                                                                                                                                | 22 | 7 | 0  | 0  | 14 | 4  | 0  | 0  | 22 | 14 | 36 | 1.6 | No dramatic change | 36 | 0  | 100.0 | Memb only           | 565 | 12 |
| ≥ 2 unique peptides | rmAC1881 | Q5V141_HALMA       | <i>deoC2</i>     | Deoxyribose-phosphate aldolase                                                                                                                                | 0  | 0 | 21 | 7  | 0  | 0  | 15 | 7  | 21 | 15 | 36 | 1.4 | No dramatic change | 0  | 36 | 0.0   | Soluble only        | 267 | 0  |
| ≥ 2 unique peptides | rmAC0999 | GLYA_HALMARReview  | <i>glyA</i>      | Serine hydroxymethyltransferase (EC 2.1.2.1) (Serine methylase)(SHMT)                                                                                         | 0  | 0 | 20 | 9  | 0  | 0  | 16 | 8  | 20 | 16 | 36 | 1.3 | No dramatic change | 0  | 36 | 0.0   | Soluble only        | 415 | 0  |
| ≥ 2 unique peptides | rmAC2808 | SYS_HALMARReview   | <i>serS</i>      | Seryl-tRNA synthetase (EC 6.1.1.11) (Seryl-tRNA(Ser/Sec) synthetase)(Serine--tRNA ligase) (SerRS)                                                             | 0  | 0 | 19 | 10 | 0  | 0  | 17 | 9  | 19 | 17 | 36 | 1.1 | No dramatic change | 0  | 36 | 0.0   | Soluble only        | 460 | 0  |
| ≥ 2 unique peptides | rmAC0833 | Q5V3T7_HALMA       | <i>ech2</i>      | Enoyl-CoA hydratase (EC 4.2.1.17)                                                                                                                             | 1  | 1 | 12 | 3  | 2  | 1  | 21 | 8  | 13 | 23 | 36 | 0.6 | No dramatic change | 3  | 33 | 8.3   | Soluble predominant | 285 | 0  |
| ≥ 2 unique peptides | rmAC0322 | Q5V530_HALMA       | <i>pepQ</i>      | Xaa-Pro aminopeptidase (EC 3.4.11.9)                                                                                                                          | 0  | 0 | 15 | 6  | 0  | 0  | 21 | 9  | 15 | 21 | 36 | 0.7 | No dramatic change | 0  | 36 | 0.0   | Soluble only        | 400 | 0  |
| ≥ 2 unique peptides | rmAC1730 | Q5V1G9_HALMA       | <i>rrmAC1730</i> | Hypothetical protein                                                                                                                                          | 0  | 0 | 16 | 6  | 0  | 0  | 19 | 7  | 16 | 19 | 35 | 0.8 | No dramatic change | 0  | 35 | 0.0   | Soluble only        | 58  | 0  |
| ≥ 2 unique peptides | rmAC2967 | SYFB_HALMARReview  | <i>pheT</i>      | Phenylalanyl-tRNA synthetase beta chain (EC 6.1.1.20) (Phenylalanine--tRNA ligase beta chain) (PheRS)                                                         | 0  | 0 | 20 | 12 | 1  | 1  | 14 | 9  | 20 | 15 | 35 | 1.3 | No dramatic change | 1  | 34 | 2.9   | Soluble predominant | 584 | 0  |
| ≥ 2 unique peptides | rmAC0537 | TPIS_HALMARReview  | <i>tpiA</i>      | Triosephosphate isomerase (EC 5.3.1.1) (TIM) (Triose-phosphate isomerase)                                                                                     | 0  | 0 | 20 | 5  | 0  | 0  | 15 | 5  | 20 | 15 | 35 | 1.3 | No dramatic change | 0  | 35 | 0.0   | Soluble only        | 215 | 0  |
| ≥ 2 unique peptides | rmAC0081 | Q5V5P2_HALMA       | <i>idsA</i>      | Geranylgeranyl diphosphate synthase (EC 2.5.1.1) (EC 2.5.1.10)                                                                                                | 0  | 0 | 19 | 9  | 0  | 0  | 16 | 7  | 19 | 16 | 35 | 1.2 | No dramatic change | 0  | 35 | 0.0   | Soluble only        | 346 | 0  |
| ≥ 2 unique peptides | rmAC2699 | Q5UZ34_HALMA       | <i>rrmAC2699</i> | Putative inosine monophosphate dehydrogenase (EC 1.1.1.205)                                                                                                   | 0  | 0 | 19 | 8  | 0  | 0  | 16 | 5  | 19 | 16 | 35 | 1.2 | No dramatic change | 0  | 35 | 0.0   | Soluble only        | 289 | 0  |
| ≥ 2 unique peptides | rmAC0012 | Q5V5V5_HALMA       | <i>adh11</i>     | Zinc-binding dehydrogenase (EC 1.1.1.1) (EC 1.6.5.5)                                                                                                          | 0  | 0 | 18 | 7  | 1  | 1  | 16 | 8  | 18 | 17 | 35 | 1.1 | No dramatic change | 1  | 34 | 2.9   | Soluble predominant | 360 | 0  |
| ≥ 2 unique peptides | pNG6056  | Q5V6Y2_HALMA       | <i>copA2</i>     | Copper-transporting ATPase CopA                                                                                                                               | 15 | 9 | 0  | 0  | 20 | 12 | 0  | 0  | 15 | 20 | 35 | 0.8 | No dramatic change | 35 | 0  | 100.0 | Memb only           | 760 | 8  |
| ≥ 2 unique peptides | rmAC0289 | Q5V557_HALMA       | <i>ejf2BD1</i>   | Translation initiation factor eIF-2B subunit delta                                                                                                            | 0  | 0 | 16 | 6  | 0  | 0  | 19 | 8  | 16 | 19 | 35 | 0.8 | No dramatic change | 0  | 35 | 0.0   | Soluble only        | 283 | 0  |
| ≥ 2 unique peptides | rmAC3089 | Q5UY49_HALMA       | <i>pspA2</i>     | Transcription regulator                                                                                                                                       | 21 | 9 | 1  | 1  | 12 | 6  | 0  | 0  | 22 | 12 | 34 | 1.8 | No dramatic change | 33 | 1  | 97.1  | Memb predominant    | 241 | 0  |
| ≥ 2 unique peptides | rmAC0681 | Q5V470_HALMA       | <i>tbpE</i>      | TATA-box binding protein E                                                                                                                                    | 5  | 2 | 17 | 5  | 2  | 1  | 10 | 2  | 22 | 12 | 34 | 1.8 | No dramatic change | 7  | 27 | 20.6  | Soluble predominant | 186 | 0  |
| ≥ 2 unique peptides | pNG5069  | Q5V7M3_HALMA       | <i>pNG5069</i>   | Hypothetical protein                                                                                                                                          | 24 | 8 | 0  | 0  | 10 | 4  | 0  | 0  | 24 | 10 | 34 | 2.4 | 0.7 (2-3X)         | 34 | 0  | 100.0 | Memb only           | 760 | 10 |
| ≥ 2 unique peptides | pNG4046  | Q5V7W8_HALMA       | <i>pNG4046</i>   | Hypothetical protein                                                                                                                                          | 0  | 0 | 21 | 5  | 0  | 0  | 13 | 8  | 21 | 13 | 34 | 1.6 | No dramatic change | 0  | 34 | 0.0   | Soluble only        | 270 | 0  |
| ≥ 2 unique peptides | rmAC3149 | QSUXZ7_HALMA       | <i>rrmAC3149</i> | Hypothetical protein                                                                                                                                          | 19 | 9 | 0  | 0  | 15 | 9  | 0  | 0  | 19 | 15 | 34 | 1.3 | No dramatic change | 34 | 0  | 100.0 | Memb only           | 364 | 2  |
| ≥ 2 unique peptides | pNG4047  | Q5V7W7_HALMA       | <i>pNG4047</i>   | Hypothetical protein                                                                                                                                          | 0  | 0 | 18 | 11 | 0  | 0  | 16 | 11 | 18 | 16 | 34 | 1.1 | No dramatic change | 0  | 34 | 0.0   | Soluble only        | 710 | 0  |
| ≥ 2 unique peptides | rmB0206  | Q5UWG4_HALMA       | <i>aspC1</i>     | Aspartate aminotransferase (EC 2.6.1.1)                                                                                                                       | 4  | 2 | 24 | 8  | 0  | 0  | 6  | 1  | 28 | 6  | 34 | 4.7 | 0.7 (>3X)          | 4  | 30 | 11.8  | Soluble predominant | 372 | 0  |
| ≥ 2 unique peptides | rmAC3531 | QSUX05_HALMA       | <i>ndhG2</i>     | NADH dehydrogenase/oxidoreductase                                                                                                                             | 22 | 2 | 0  | 0  | 12 | 3  | 0  | 0  | 22 | 12 | 34 | 1.8 | No dramatic change | 34 | 0  | 100.0 | Memb only           | 497 | 13 |
| ≥ 2 unique peptides | rmAC1642 | GATB_HALMARReview  | <i>gatB</i>      | Aspartyl/glutamyl-tRNA(Asn/Gln) amidotransferase subunit B(EC 6.3.5.-) (Asp/Glu-ADT subunit B)                                                                | 0  | 0 | 15 | 5  | 0  | 0  | 19 | 7  | 15 | 19 | 34 | 0.8 | No dramatic change | 0  | 34 | 0.0   | Soluble only        | 505 | 0  |
| ≥ 2 unique peptides | rmAC0650 | Q5V498_HALMA       | <i>acs1</i>      | Acyl-coenzyme A synthetases (EC 6.2.1.1)                                                                                                                      | 0  | 0 | 13 | 8  | 1  | 1  | 20 | 9  | 13 | 21 | 34 | 0.6 | No dramatic change | 1  | 33 | 2.9   | Soluble predominant | 673 | 0  |
| ≥ 2 unique peptides | rmAC1409 | Q5V2B4_HALMA       | <i>gltA1</i>     | Lactoylglutathione lyase (EC 4.4.1.5)                                                                                                                         | 0  | 0 | 5  | 2  | 0  | 0  | 29 | 11 | 5  | 29 | 34 | 0.2 | 1.2 (>3X)          | 0  | 34 | 0.0   | Soluble only        | 250 | 0  |
| ≥ 2 unique peptides | rmAC0059 | RS4_HALMARReview   | <i>rps4p</i>     | 30S ribosomal protein S4P (HmaS4)                                                                                                                             | 0  | 0 | 27 | 8  | 0  | 0  | 7  | 4  | 27 | 7  | 34 | 3.9 | 0.7 (>3X)          | 0  | 34 | 0.0   | Soluble only        | 171 | 0  |
| ≥ 2 unique peptides | rmAC1509 | Q5V222_HALMA       | <i>phoX</i>      | Phosphate ABC transporter phosphate-binding protein                                                                                                           | 20 | 7 | 0  | 0  | 14 | 4  | 0  | 0  | 20 | 14 | 34 | 1.4 | No dramatic change | 34 | 0  | 100.0 | Memb only           | 337 | 0  |
| ≥ 2 unique peptides | rmAC1282 | Q5V2N2_HALMA       | <i>rrmAC1282</i> | Hypothetical protein                                                                                                                                          | 0  | 0 | 20 | 5  | 0  | 0  | 13 | 6  | 20 | 13 | 33 | 1.5 | No dramatic change | 0  | 33 | 0.0   | Soluble only        | 101 | 0  |
| ≥ 2 unique peptides | rmAC2612 | Q5UZA2_HALMA       | <i>rrmAC2612</i> | Hypothetical protein                                                                                                                                          | 16 | 5 | 0  | 0  | 17 | 7  | 0  | 0  | 16 | 17 | 33 | 0.9 | No dramatic change | 33 | 0  | 100.0 | Memb only           | 468 | 1  |
| ≥ 2 unique peptides | rmB0210  | Q5UWG0_HALMA       | <i>galE10</i>    | UDP-glucose 4-epimerase                                                                                                                                       | 3  | 3 | 21 | 7  | 0  | 0  | 9  | 6  | 24 | 9  | 33 | 2.7 | 0.7 (2-3X)         | 3  | 30 | 9.1   | Soluble predominant | 319 | 0  |
| ≥ 2 unique peptides | rmB0255  | Q5UWC4_HALMA       | <i>rrmB0255</i>  | Amidohydrolase                                                                                                                                                | 0  | 0 | 24 | 8  | 0  | 0  | 9  | 4  | 24 | 9  | 33 | 2.7 | 0.7 (2-3X)         | 0  | 33 | 0.0   | Soluble only        | 259 | 0  |
| ≥ 2 unique peptides | rmB0249  | Q5UWC9_HALMA       | <i>paaC</i>      | Phenylacetic acid degradation protein PaaC                                                                                                                    | 0  | 0 | 20 | 8  | 0  | 0  | 13 | 7  | 20 | 13 | 33 | 1.5 | No dramatic change | 0  | 33 | 0.0   | Soluble only        | 277 | 0  |
| ≥ 2 unique peptides | rmAC1707 | PHS_HALMARReview   | <i>rrmAC1707</i> | Putative pterin-4-alpha-carbinolamine dehydratase (EC 4.2.1.96) (PHS)(4-alpha-hydroxy-tetrahydropterin dehydratase) (Pterin carbinolaminatedehydratase) (PCD) | 0  | 0 | 17 | 6  | 0  | 0  | 16 | 7  | 17 | 16 | 33 | 1.1 | No dramatic change | 0  | 33 | 0.0   | Soluble only        | 92  | 0  |
| ≥ 2 unique peptides | rmAC2150 | Q5V0F9_HALMA       | <i>prp1</i>      | Phosphate regulatory protein-like                                                                                                                             | 0  | 0 | 7  | 3  | 4  | 2  | 22 | 7  | 7  | 26 | 33 | 0.3 | 1.2 (>3X)          | 4  | 29 | 12.1  | Soluble predominant | 334 | 0  |
| ≥ 2 unique peptides | rmAC2230 | Q5V090_HALMA       | <i>oppC1</i>     | Oligopeptide transport system permease protein OppC                                                                                                           | 21 | 6 | 0  | 0  | 12 | 4  | 0  | 0  | 21 | 12 | 33 | 1.8 | No dramatic change | 33 | 0  | 100.0 | Memb only           | 309 | 6  |
| ≥ 2 unique peptides | rmAC1750 | Q5V1F3_HALMA       | <i>argT</i>      | Amino acid ABC transporter amino acid-binding protein                                                                                                         | 19 | 4 | 0  | 0  | 14 | 3  | 0  | 0  | 19 | 14 | 33 | 1.4 | No dramatic change | 33 | 0  | 100.0 | Memb only           | 266 | 0  |
| ≥ 2 unique peptides | rmAC1281 | Q5V2N3_HALMA       | <i>rrmAC1281</i> | Hypothetical protein                                                                                                                                          | 3  | 2 | 12 | 8  | 1  | 1  | 16 | 12 | 15 | 17 | 32 | 0.9 | No dramatic change | 4  | 28 | 12.5  | Soluble predominant | 863 | 0  |
| ≥ 2 unique peptides | rmAC0892 | Q5V3N2_HALMA       | <i>rrmAC0892</i> | Hypothetical protein                                                                                                                                          | 14 | 3 | 0  | 0  | 18 | 4  | 0  | 0  | 14 | 18 | 32 | 0.8 | No dramatic change | 32 | 0  | 100.0 | Memb only           | 194 | 0  |

|                     |          |                    |                  |                                                                                                                                                       |    |    |    |    |    |   |    |    |    |    |    |     |                    |    |    |       |                     |      |   |
|---------------------|----------|--------------------|------------------|-------------------------------------------------------------------------------------------------------------------------------------------------------|----|----|----|----|----|---|----|----|----|----|----|-----|--------------------|----|----|-------|---------------------|------|---|
| ≥ 2 unique peptides | rmAC1028 | Q5V3A9_HALMA       | <i>lolC</i>      | Putative permease                                                                                                                                     | 15 | 8  | 0  | 0  | 17 | 9 | 0  | 0  | 15 | 17 | 32 | 0.9 | No dramatic change | 32 | 0  | 100.0 | Memb only           | 1021 | 8 |
| ≥ 2 unique peptides | rmAC2245 | Q5V077_HALMA       | <i>rrmAC2245</i> | M50 family metallopeptidase                                                                                                                           | 15 | 2  | 0  | 0  | 17 | 3 | 0  | 0  | 15 | 17 | 32 | 0.9 | No dramatic change | 32 | 0  | 100.0 | Memb only           | 289  | 3 |
| ≥ 2 unique peptides | rmAC0103 | RL7A_HALMARReview  | <i>rpl7ae</i>    | 50S ribosomal protein L7Ae (Hs6)                                                                                                                      | 0  | 0  | 16 | 2  | 3  | 1 | 13 | 2  | 16 | 16 | 32 | 1.0 | No dramatic change | 3  | 29 | 9.4   | Soluble predominant | 120  | 0 |
| ≥ 2 unique peptides | rmAC2103 | Q5V0J9_HALMA       | <i>rli</i>       | RNase L inhibitor                                                                                                                                     | 0  | 0  | 16 | 8  | 0  | 0 | 16 | 7  | 16 | 16 | 32 | 1.0 | No dramatic change | 0  | 32 | 0.0   | Soluble only        | 609  | 0 |
| ≥ 2 unique peptides | rmAC3516 | Q5UX18_HALMA       | <i>rrmAC3516</i> | Hypothetical protein                                                                                                                                  | 18 | 5  | 0  | 0  | 13 | 5 | 0  | 0  | 18 | 13 | 31 | 1.4 | No dramatic change | 31 | 0  | 100.0 | Memb only           | 90   | 0 |
| ≥ 2 unique peptides | rmAC3552 | Q5UWY7_HALMA       | <i>rrmAC3552</i> | Hypothetical protein                                                                                                                                  | 16 | 5  | 0  | 0  | 15 | 6 | 0  | 0  | 16 | 15 | 31 | 1.1 | No dramatic change | 31 | 0  | 100.0 | Memb only           | 150  | 2 |
| ≥ 2 unique peptides | rmAC1112 | Q5V333_HALMA       | <i>rrmAC1112</i> | Hypothetical protein                                                                                                                                  | 0  | 0  | 16 | 4  | 0  | 0 | 15 | 4  | 16 | 15 | 31 | 1.1 | No dramatic change | 0  | 31 | 0.0   | Soluble only        | 129  | 0 |
| ≥ 2 unique peptides | pNG1025  | Q5V882_HALMA       | <i>pNG1025</i>   | Hypothetical protein                                                                                                                                  | 0  | 0  | 12 | 8  | 0  | 0 | 19 | 8  | 12 | 19 | 31 | 0.6 | No dramatic change | 0  | 31 | 0.0   | Soluble only        | 248  | 0 |
| ≥ 2 unique peptides | rmAC0836 | Q5V3T4_HALMA       | <i>csq2</i>      | Surface glycoprotein                                                                                                                                  | 0  | 0  | 11 | 6  | 0  | 0 | 20 | 7  | 11 | 20 | 31 | 0.6 | No dramatic change | 0  | 31 | 0.0   | Soluble only        | 71   | 0 |
| ≥ 2 unique peptides | rmAC2675 | Q5UZ52_HALMA       | <i>argD</i>      | Acetylmethine aminotransferase (EC 2.6.1.11)                                                                                                          | 0  | 0  | 19 | 7  | 0  | 0 | 12 | 6  | 19 | 12 | 31 | 1.6 | No dramatic change | 0  | 31 | 0.0   | Soluble only        | 375  | 0 |
| ≥ 2 unique peptides | rmAC0546 | Q5V4I8_HALMA       | <i>pykA</i>      | Pyruvate kinase (EC 2.7.1.40)                                                                                                                         | 0  | 0  | 19 | 4  | 0  | 0 | 12 | 4  | 19 | 12 | 31 | 1.6 | No dramatic change | 0  | 31 | 0.0   | Soluble only        | 610  | 0 |
| ≥ 2 unique peptides | rmAC1656 | Q5V1N3_HALMA       | <i>rrmAC1656</i> | Nitrite/nitrate reduction protein                                                                                                                     | 16 | 4  | 0  | 0  | 15 | 4 | 0  | 0  | 16 | 15 | 31 | 1.1 | No dramatic change | 31 | 0  | 100.0 | Memb only           | 299  | 6 |
| ≥ 2 unique peptides | rmAC0841 | Q5V3S9_HALMA       | <i>ech1</i>      | Enoyl-CoA hydratase (EC 4.2.1.17)                                                                                                                     | 0  | 0  | 15 | 5  | 0  | 0 | 16 | 8  | 15 | 16 | 31 | 0.9 | No dramatic change | 0  | 31 | 0.0   | Soluble only        | 353  | 0 |
| ≥ 2 unique peptides | rmAC3121 | Q5UY23_HALMA       | <i>eda</i>       | 2-dehydro-3-deoxyphosphogluconate aldolase/4-hydroxy-2-oxoglutaratealdolase (EC 4.1.2.14)                                                             | 0  | 0  | 14 | 4  | 0  | 0 | 17 | 4  | 14 | 17 | 31 | 0.8 | No dramatic change | 0  | 31 | 0.0   | Soluble only        | 397  | 0 |
| ≥ 2 unique peptides | rmAC3197 | Q5UXV2_HALMA       | <i>malE2</i>     | Trehalose/maltose binding protein                                                                                                                     | 14 | 7  | 0  | 0  | 17 | 8 | 0  | 0  | 14 | 17 | 31 | 0.8 | No dramatic change | 31 | 0  | 100.0 | Memb only           | 446  | 0 |
| ≥ 2 unique peptides | rmAC3326 | Q5UXI7_HALMA       | <i>ftsZ4</i>     | Cell division protein                                                                                                                                 | 10 | 8  | 4  | 4  | 3  | 3 | 13 | 8  | 14 | 16 | 30 | 0.9 | No dramatic change | 13 | 17 | 43.3  | Memb + Sol          | 357  | 0 |
| ≥ 2 unique peptides | rmAC0079 | Q5V5P4_HALMA       | <i>rrmAC0079</i> | Hypothetical protein                                                                                                                                  | 19 | 10 | 0  | 0  | 11 | 6 | 0  | 0  | 19 | 11 | 30 | 1.7 | No dramatic change | 30 | 0  | 100.0 | Memb only           | 496  | 2 |
| ≥ 2 unique peptides | rmAC0776 | Q5V3Y7_HALMA       | <i>rrmAC0776</i> | Hypothetical protein                                                                                                                                  | 19 | 7  | 0  | 0  | 11 | 4 | 0  | 0  | 19 | 11 | 30 | 1.7 | No dramatic change | 30 | 0  | 100.0 | Memb only           | 161  | 0 |
| ≥ 2 unique peptides | rmAC2810 | Q5UYT7_HALMA       | <i>rrmAC2810</i> | Hypothetical protein                                                                                                                                  | 0  | 0  | 15 | 3  | 0  | 0 | 15 | 4  | 15 | 15 | 30 | 1.0 | No dramatic change | 0  | 30 | 0.0   | Soluble only        | 329  | 0 |
| ≥ 2 unique peptides | rmAC0726 | Q5V433_HALMA       | <i>rrmAC0726</i> | Hypothetical protein                                                                                                                                  | 6  | 5  | 8  | 5  | 10 | 5 | 6  | 3  | 14 | 16 | 30 | 0.9 | No dramatic change | 16 | 14 | 53.3  | Memb + Sol          | 411  | 0 |
| ≥ 2 unique peptides | rmAC3356 | Q5UXF8_HALMA       | <i>rrmAC3356</i> | Hypothetical protein                                                                                                                                  | 13 | 3  | 0  | 0  | 17 | 3 | 0  | 0  | 13 | 17 | 30 | 0.8 | No dramatic change | 30 | 0  | 100.0 | Memb only           | 257  | 5 |
| ≥ 2 unique peptides | rmAC1121 | THYX_HALMARReview  | <i>thyX</i>      | Thymidylate synthase thyX (EC 2.1.1.148) (TS) (TSase)                                                                                                 | 0  | 0  | 19 | 8  | 0  | 0 | 11 | 9  | 19 | 11 | 30 | 1.7 | No dramatic change | 0  | 30 | 0.0   | Soluble only        | 247  | 0 |
| ≥ 2 unique peptides | rmAC2650 | Q5UZ73_HALMA       | <i>leuS1</i>     | Leucyl-tRNA synthetase (EC 6.1.1.4)                                                                                                                   | 0  | 0  | 16 | 6  | 0  | 0 | 14 | 8  | 16 | 14 | 30 | 1.1 | No dramatic change | 0  | 30 | 0.0   | Soluble only        | 892  | 0 |
| ≥ 2 unique peptides | rmAC0448 | Q5V4S2_HALMA       | <i>udp2</i>      | Uridine phosphorylase (EC 2.4.2.3)                                                                                                                    | 0  | 0  | 15 | 5  | 0  | 0 | 15 | 5  | 15 | 15 | 30 | 1.0 | No dramatic change | 0  | 30 | 0.0   | Soluble only        | 274  | 0 |
| ≥ 2 unique peptides | rmAC1426 | RS15_HALMARReview  | <i>rps15p</i>    | 30S ribosomal protein S15P/S13e (HmaS15) (HS11)                                                                                                       | 4  | 1  | 14 | 6  | 4  | 1 | 8  | 6  | 18 | 12 | 30 | 1.5 | No dramatic change | 8  | 22 | 26.7  | Memb + Sol          | 156  | 0 |
| ≥ 2 unique peptides | rmAC2424 | RS12_HALMARReview  | <i>rps12p</i>    | 30S ribosomal protein S12P                                                                                                                            | 8  | 2  | 7  | 2  | 10 | 2 | 5  | 1  | 15 | 15 | 30 | 1.0 | No dramatic change | 18 | 12 | 60.0  | Memb + Sol          | 142  | 0 |
| ≥ 2 unique peptides | rmAC2829 | Q5UYS0_HALMA       | <i>rpoE'</i>     | DNA-directed RNA polymerase subunit E'                                                                                                                | 0  | 0  | 22 | 4  | 0  | 0 | 7  | 3  | 22 | 7  | 29 | 3.1 | 0.7 (>3X)          | 0  | 29 | 0.0   | Soluble only        | 192  | 0 |
| ≥ 2 unique peptides | rmAC1133 | Q5V314_HALMA       | <i>rpaA</i>      | Replication protein A                                                                                                                                 | 0  | 0  | 12 | 5  | 0  | 0 | 17 | 6  | 12 | 17 | 29 | 0.7 | No dramatic change | 0  | 29 | 0.0   | Soluble only        | 426  | 0 |
| ≥ 2 unique peptides | rmAC1135 | Q5V313_HALMA       | <i>rrmAC1135</i> | Hypothetical protein                                                                                                                                  | 0  | 0  | 18 | 8  | 0  | 0 | 11 | 6  | 18 | 11 | 29 | 1.6 | No dramatic change | 0  | 29 | 0.0   | Soluble only        | 573  | 0 |
| ≥ 2 unique peptides | pNG2007  | Q5V851_HALMA       | <i>pNG2007</i>   | Hypothetical protein                                                                                                                                  | 0  | 0  | 18 | 8  | 0  | 0 | 11 | 5  | 18 | 11 | 29 | 1.6 | No dramatic change | 0  | 29 | 0.0   | Soluble only        | 372  | 0 |
| ≥ 2 unique peptides | pNG7179  | Q5V6G7_HALMA       | <i>pNG7179</i>   | Hypothetical protein                                                                                                                                  | 1  | 1  | 14 | 5  | 1  | 1 | 13 | 2  | 15 | 14 | 29 | 1.1 | No dramatic change | 2  | 27 | 6.9   | Soluble predominant | 218  | 0 |
| ≥ 2 unique peptides | rmAC0996 | FOLD1_HALMARReview | <i>folD1</i>     | Bifunctional protein fold 1 [Includes: Methylene-tetrahydrofolate dehydrogenase (EC 1.5.1.5); Methylene-tetrahydrofolate cyclohydrolase (EC 3.5.4.9)] | 0  | 0  | 14 | 6  | 0  | 0 | 15 | 9  | 14 | 15 | 29 | 0.9 | No dramatic change | 0  | 29 | 0.0   | Soluble only        | 297  | 0 |
| ≥ 2 unique peptides | pNG7380  | FTHS_HALMARReview  | <i>fts</i>       | Formate-tetrahydrofolate ligase (EC 6.3.4.3) (Formyltetrahydrofolatesynthetase) (FTHFS)                                                               | 0  | 0  | 2  | 1  | 1  | 1 | 26 | 11 | 2  | 27 | 29 | 0.1 | 1.2 (>3X)          | 1  | 28 | 3.4   | Soluble predominant | 553  | 0 |
| ≥ 2 unique peptides | rmAC0061 | RS11_HALMARReview  | <i>rps11p</i>    | 30S ribosomal protein S11P (HmaS11) (HS19)                                                                                                            | 4  | 3  | 19 | 6  | 0  | 0 | 6  | 3  | 23 | 6  | 29 | 3.8 | 0.7 (>3X)          | 4  | 25 | 13.8  | Soluble predominant | 129  | 0 |
| ≥ 2 unique peptides | rmAC0058 | RS13_HALMARReview  | <i>rps13p</i>    | 30S ribosomal protein S13P (HmaS13)                                                                                                                   | 4  | 4  | 17 | 5  | 2  | 2 | 6  | 3  | 21 | 8  | 29 | 2.6 | 0.7 (>3X)          | 6  | 23 | 20.7  | Soluble predominant | 177  | 0 |
| ≥ 2 unique peptides | pNG5003  | Q5V7G2_HALMA       | <i>yvrO-1</i>    | ABC transporter ATP-binding protein                                                                                                                   | 12 | 5  | 0  | 0  | 17 | 8 | 0  | 0  | 12 | 17 | 29 | 0.7 | No dramatic change | 29 | 0  | 100.0 | Memb only           | 227  | 0 |
| ≥ 2 unique peptides | pNG7016  | Q5V6W2_HALMA       | <i>pNG7016</i>   | Hypothetical protein                                                                                                                                  | 0  | 0  | 17 | 6  | 0  | 0 | 11 | 6  | 17 | 11 | 28 | 1.5 | No dramatic change | 0  | 28 | 0.0   | Soluble only        | 452  | 0 |
| ≥ 2 unique peptides | rmAC2250 | Q5V072_HALMA       | <i>rrmAC2250</i> | Hypothetical protein                                                                                                                                  | 0  | 0  | 16 | 7  | 0  | 0 | 12 | 9  | 16 | 12 | 28 | 1.3 | No dramatic change | 0  | 28 | 0.0   | Soluble only        | 653  | 0 |
| ≥ 2 unique peptides | rmAC1735 | Q5V1G4_HALMA       | <i>rrmAC1735</i> | Hypothetical protein                                                                                                                                  | 0  | 0  | 15 | 4  | 0  | 0 | 13 | 4  | 15 | 13 | 28 | 1.2 | No dramatic change | 0  | 28 | 0.0   | Soluble only        | 193  | 0 |
| ≥ 2 unique peptides | pNG6187  | Q5V7B7_HALMA       | <i>pNG6187</i>   | Hypothetical protein                                                                                                                                  | 0  | 0  | 14 | 10 | 0  | 0 | 14 | 11 | 14 | 14 | 28 | 1.0 | No dramatic change | 0  | 28 | 0.0   | Soluble only        | 965  | 0 |
| ≥ 2 unique peptides | rmAC3438 | Q5UX86_HALMA       | <i>rrmAC3438</i> | Hypothetical protein                                                                                                                                  | 13 | 5  | 0  | 0  | 15 | 6 | 0  | 0  | 13 | 15 | 28 | 0.9 | No dramatic change | 28 | 0  | 100.0 | Memb only           | 606  | 3 |
| ≥ 2 unique peptides | rmAC2581 | Q5UZC9_HALMA       | <i>rrmAC2581</i> | Hypothetical protein                                                                                                                                  | 0  | 0  | 9  | 3  | 0  | 0 | 19 | 7  | 9  | 19 | 28 | 0.5 | 1.2 (2-3X)         | 0  | 28 | 0.0   | Soluble only        | 230  | 0 |
| ≥ 2 unique peptides | rmAC3227 | Q5UXS4_HALMA       | <i>rrmAC3227</i> | Hypothetical protein                                                                                                                                  | 8  | 4  | 0  | 0  | 20 | 7 | 0  | 0  | 8  | 20 | 28 | 0.4 | 1.2 (2-3X)         | 28 | 0  | 100.0 | Memb only           | 142  | 2 |
| ≥ 2 unique peptides | rmAC0549 | Q5V4I5_HALMA       | <i>rrmAC0549</i> | Hypothetical protein                                                                                                                                  | 7  | 4  | 0  | 0  | 21 | 8 | 0  | 0  | 7  | 21 | 28 | 0.3 | 1.2 (>3X)          | 28 | 0  | 100.0 | Memb only           | 362  | 8 |
| ≥ 2 unique peptides | rmAC0903 | Q5V3M3_HALMA       | <i>accA</i>      | Acetyl-CoA carboxylase alpha subunit                                                                                                                  | 0  | 0  | 16 | 7  | 0  | 0 | 12 | 7  | 16 | 12 | 28 | 1.3 | No dramatic change | 0  | 28 | 0.0   | Soluble only        | 527  | 0 |
| ≥ 2 unique peptides | rmAC3152 | Q5UXZ4_HALMA       | <i>atpG</i>      | Vacuolar (H <sup>+</sup> )-ATPase G subunit (EC 3.6.3.14)                                                                                             | 5  | 2  | 10 | 3  | 7  | 2 | 6  | 2  | 15 | 13 | 28 | 1.2 | No dramatic change | 12 | 16 | 42.9  | Memb + Sol          | 110  | 0 |
| ≥ 2 unique peptides | rmAC2522 | Q5UZH8_HALMA       | <i>manB3</i>     | Phosphoglucomutase/phosphomannomutase (EC 5.4.2.2) (EC 5.4.2.8)                                                                                       | 0  | 0  | 15 | 6  | 0  | 0 | 13 | 7  | 15 | 13 | 28 | 1.2 | No dramatic change | 0  | 28 | 0.0   | Soluble only        | 459  | 0 |
| ≥ 2 unique peptides | rmAC3238 | Q5UXR6_HALMA       | <i>rffH3</i>     | Glucose-1-phosphate thymidyltransferase (EC 2.7.7.24)                                                                                                 | 1  | 1  | 9  | 3  | 2  | 1 | 16 | 3  | 10 | 18 | 28 | 0.6 | No dramatic change | 3  | 25 | 10.7  | Soluble predominant | 251  | 0 |
| ≥ 2 unique peptides | rmAC2580 | Q5UZD0_HALMA       | <i>imp</i>       | Immunogenic protein                                                                                                                                   | 17 | 2  | 0  | 0  | 11 | 1 | 0  | 0  | 17 | 11 | 28 | 1.5 | No dramatic change | 28 | 0  | 100.0 | Memb only           | 345  | 0 |
| ≥ 2 unique peptides | rmAC2782 | Q5UYW3_HALMA       | <i>rhn</i>       | Ribonuclease BN                                                                                                                                       | 14 | 3  | 0  | 0  | 14 | 3 | 0  | 0  | 14 | 14 | 28 | 1.0 | No dramatic change | 28 | 0  | 100.0 | Memb only           | 379  | 8 |
| ≥ 2 unique peptides | rmAC0147 | Q5V5I5_HALMA       | <i>tpaA</i>      | Thiamine-binding periplasmic protein-like                                                                                                             | 21 | 8  | 0  | 0  | 7  | 4 | 0  | 0  | 21 | 7  | 28 | 3.0 | 0.7 (>3X)          | 28 | 0  | 100.0 | Memb only           | 374  | 0 |
| ≥ 2 unique peptides | rmAC3309 | Y3309_HALMARReview | <i>rrmAC3309</i> | UPF0343 protein rrmAC3309                                                                                                                             | 0  | 0  | 13 | 5  | 0  | 0 | 14 | 5  | 13 | 14 | 27 | 0.9 | No dramatic change | 0  | 27 | 0.0   | Soluble only        | 309  | 0 |
| ≥ 2 unique peptides | rmAC1702 | Q5V1J4_HALMA       | <i>rrmAC1702</i> | Hypothetical protein                                                                                                                                  | 18 | 10 | 0  | 0  | 9  | 5 | 0  | 0  | 18 | 9  | 27 | 2.0 | 0.7 (2-3X)         | 27 | 0  | 100.0 | Memb only           | 405  | 2 |
| ≥ 2 unique peptides | rmAC1130 | Q5V317_HALMA       | <i>rrmAC1130</i> | Hypothetical protein                                                                                                                                  | 1  | 1  | 15 | 4  | 0  | 0 | 11 | 4  | 16 | 11 | 27 | 1.5 | No dramatic change | 1  | 26 | 3.7   | Soluble predominant | 95   | 0 |



|                     |          |                   |                  |                                                                                                          |    |   |    |   |    |    |    |    |    |    |    |     |                    |    |    |       |                     |      |    |
|---------------------|----------|-------------------|------------------|----------------------------------------------------------------------------------------------------------|----|---|----|---|----|----|----|----|----|----|----|-----|--------------------|----|----|-------|---------------------|------|----|
| ≥ 2 unique peptides | rmAC3011 | Q5UYB6_HALMA      | <i>cbiK</i>      | Colbalt chelase thioredoxin (EC 4.99.1.-)                                                                | 6  | 3 | 12 | 3 | 1  | 1  | 8  | 2  | 18 | 9  | 27 | 2.0 | 0.7 (2-3X)         | 7  | 20 | 25.9  | Memb + Sol          | 407  | 0  |
| ≥ 2 unique peptides | rmAC0927 | Q5V3K1_HALMA      | <i>pyrE2</i>     | Orotate phosphoribosyltransferase (EC 2.4.2.10)                                                          | 0  | 0 | 15 | 6 | 2  | 2  | 10 | 6  | 15 | 12 | 27 | 1.3 | No dramatic change | 2  | 25 | 7.4   | Soluble predominant | 212  | 0  |
| ≥ 2 unique peptides | rmAC3462 | SYT_HALMAReview   | <i>thrS</i>      | Threonyl-tRNA synthetase (EC 6.1.1.3) (Threonine--tRNA ligase)(ThrRS)                                    | 0  | 0 | 15 | 7 | 0  | 0  | 12 | 6  | 15 | 12 | 27 | 1.3 | No dramatic change | 0  | 27 | 0.0   | Soluble only        | 642  | 0  |
| ≥ 2 unique peptides | rmAC1149 | Q5V302_HALMA      | <i>ctpB</i>      | Cation transporting ATPase                                                                               | 13 | 8 | 0  | 0 | 14 | 7  | 0  | 0  | 13 | 14 | 27 | 0.9 | No dramatic change | 27 | 0  | 100.0 | Memb only           | 793  | 7  |
| ≥ 2 unique peptides | rmAC2561 | SYA_HALMAReview   | <i>alaS</i>      | Alanyl-tRNA synthetase (EC 6.1.1.7) (Alanine--tRNA ligase) (AlaRS)                                       | 0  | 0 | 12 | 7 | 0  | 0  | 15 | 11 | 12 | 15 | 27 | 0.8 | No dramatic change | 0  | 27 | 0.0   | Soluble only        | 927  | 0  |
| ≥ 2 unique peptides | rmAC0438 | Q5V4T0_HALMA      | <i>purM</i>      | Phosphoribosylformylglycinamide cyclo-ligase (EC 6.3.3.1)                                                | 0  | 0 | 12 | 6 | 0  | 0  | 15 | 7  | 12 | 15 | 27 | 0.8 | No dramatic change | 0  | 27 | 0.0   | Soluble only        | 336  | 0  |
| ≥ 2 unique peptides | rmAC1526 | Q5V206_HALMA      | <i>yfmJ2</i>     | Quinone oxidoreductase (EC 1.6.5.5)                                                                      | 0  | 0 | 8  | 4 | 0  | 0  | 19 | 5  | 8  | 19 | 27 | 0.4 | 1.2 (2-3X)         | 0  | 27 | 0.0   | Soluble only        | 337  | 0  |
| ≥ 2 unique peptides | rmAC2065 | RL15E_HALMAReview | <i>rpl15e</i>    | 50S ribosomal protein L15e (50S ribosomal protein LC12)                                                  | 16 | 3 | 0  | 0 | 11 | 3  | 0  | 0  | 16 | 11 | 27 | 1.5 | No dramatic change | 27 | 0  | 100.0 | Memb only           | 196  | 0  |
| ≥ 2 unique peptides | rmAC1310 | Q5V2K7_HALMA      | <i>epf2a</i>     | MRNA 3'-end processing factor-like                                                                       | 1  | 1 | 12 | 7 | 0  | 0  | 14 | 9  | 13 | 14 | 27 | 0.9 | No dramatic change | 1  | 26 | 3.7   | Soluble predominant | 640  | 0  |
| ≥ 2 unique peptides | rmAC0524 | Q5V4K8_HALMA      | <i>rrmAC0524</i> | Putative sec-independent translocation prot                                                              | 16 | 1 | 0  | 0 | 11 | 2  | 0  | 0  | 16 | 11 | 27 | 1.5 | No dramatic change | 27 | 0  | 100.0 | Memb only           | 90   | 1  |
| ≥ 2 unique peptides | rmAC2030 | Q5V0R5_HALMA      | <i>xop1</i>      | Bacteriorhodopsin                                                                                        | 7  | 2 | 0  | 0 | 20 | 4  | 0  | 0  | 7  | 20 | 27 | 0.4 | 1.2 (2-3X)         | 27 | 0  | 100.0 | Memb only           | 250  | 7  |
| ≥ 2 unique peptides | rmAC1145 | Q5V305_HALMA      | <i>blp</i>       | Bacterio-opsin linked product                                                                            | 13 | 4 | 0  | 0 | 14 | 4  | 0  | 0  | 13 | 14 | 27 | 0.9 | No dramatic change | 27 | 0  | 100.0 | Memb only           | 154  | 0  |
| ≥ 2 unique peptides | rmB0191  | Q5UWH7_HALMA      | <i>rrmB0191</i>  | Hypothetical protein                                                                                     | 1  | 1 | 18 | 5 | 0  | 0  | 7  | 4  | 19 | 7  | 26 | 2.7 | 0.7 (2-3X)         | 1  | 25 | 3.8   | Soluble predominant | 96   | 0  |
| ≥ 2 unique peptides | rmAC0708 | Q5V449_HALMA      | <i>rrmAC0708</i> | Hypothetical protein                                                                                     | 5  | 3 | 7  | 2 | 8  | 4  | 6  | 2  | 12 | 14 | 26 | 0.9 | No dramatic change | 13 | 13 | 50.0  | Memb + Sol          | 195  | 0  |
| ≥ 2 unique peptides | pNG7148  | Q5V616_HALMA      | <i>pNG7148</i>   | Hypothetical protein                                                                                     | 11 | 4 | 0  | 0 | 15 | 5  | 0  | 0  | 11 | 15 | 26 | 0.7 | No dramatic change | 26 | 0  | 100.0 | Memb only           | 270  | 7  |
| ≥ 2 unique peptides | pNG7088  | Q5V6P9_HALMA      | <i>qad</i>       | Quinohemoprotein alcohol dehydrogenase (EC 1.1.99.-)                                                     | 17 | 8 | 0  | 0 | 9  | 6  | 0  | 0  | 17 | 9  | 26 | 1.9 | No dramatic change | 26 | 0  | 100.0 | Memb only           | 407  | 0  |
| ≥ 2 unique peptides | rmAC3360 | Q5UXF4_HALMA      | <i>carB</i>      | Carbamoylphosphate synthetase large subunit (EC 6.3.5.5)                                                 | 0  | 0 | 17 | 7 | 0  | 0  | 9  | 6  | 17 | 9  | 26 | 1.9 | No dramatic change | 0  | 26 | 0.0   | Soluble only        | 1083 | 0  |
| ≥ 2 unique peptides | rmAC0419 | Q5V4U8_HALMA      | <i>gtl</i>       | Glycosyl transferase-like                                                                                | 15 | 6 | 0  | 0 | 11 | 3  | 0  | 0  | 15 | 11 | 26 | 1.4 | No dramatic change | 26 | 0  | 100.0 | Memb only           | 348  | 2  |
| ≥ 2 unique peptides | rmAC2840 | Q5UYR1_HALMA      | <i>ahcY</i>      | Adenosylhomocysteinase (EC 3.3.1.1) (AdoHcyase) (S-adenosyl-L-homocysteine hydrolase)                    | 0  | 0 | 15 | 7 | 0  | 0  | 11 | 9  | 15 | 11 | 26 | 1.4 | No dramatic change | 0  | 26 | 0.0   | Soluble only        | 425  | 0  |
| ≥ 2 unique peptides | rmAC3005 | Q5UYC1_HALMA      | <i>cobH</i>      | Precorrin-3B C17-methyltransferase (EC 2.1.1.131)                                                        | 0  | 0 | 14 | 5 | 0  | 0  | 12 | 4  | 14 | 12 | 26 | 1.2 | No dramatic change | 0  | 26 | 0.0   | Soluble only        | 332  | 0  |
| ≥ 2 unique peptides | rmAC2663 | Q5U262_HALMA      | <i>lysC</i>      | Aspartokinase (EC 2.7.2.4)                                                                               | 0  | 0 | 14 | 3 | 0  | 0  | 12 | 6  | 14 | 12 | 26 | 1.2 | No dramatic change | 0  | 26 | 0.0   | Soluble only        | 391  | 0  |
| ≥ 2 unique peptides | rmAC0246 | Q5V599_HALMA      | <i>folP3</i>     | Dihydropteroate synthase (EC 2.5.1.15)                                                                   | 0  | 0 | 11 | 5 | 1  | 1  | 14 | 10 | 11 | 15 | 26 | 0.7 | No dramatic change | 1  | 25 | 3.8   | Soluble predominant | 385  | 0  |
| ≥ 2 unique peptides | rmAC0239 | Q5V5A5_HALMA      | <i>mer2</i>      | NSN10-methylenetetrahydromethanopterin reductase                                                         | 0  | 0 | 11 | 7 | 0  | 0  | 15 | 10 | 11 | 15 | 26 | 0.7 | No dramatic change | 0  | 26 | 0.0   | Soluble only        | 369  | 0  |
| ≥ 2 unique peptides | rmAC3036 | Q5UY93_HALMA      | <i>aldY3</i>     | Aldehyde dehydrogenase                                                                                   | 0  | 0 | 10 | 5 | 0  | 0  | 16 | 8  | 10 | 16 | 26 | 0.6 | No dramatic change | 0  | 26 | 0.0   | Soluble only        | 481  | 0  |
| ≥ 2 unique peptides | rmAC1729 | SYV_HALMAReview   | <i>valS</i>      | Valyl-tRNA synthetase (EC 6.1.1.9) (Valine--tRNA ligase) (ValRS)                                         | 0  | 0 | 8  | 5 | 0  | 0  | 18 | 10 | 8  | 18 | 26 | 0.4 | 1.2 (2-3X)         | 0  | 26 | 0.0   | Soluble only        | 901  | 0  |
| ≥ 2 unique peptides | rmAC1929 | IF5A_HALMAReview  | <i>ef5a</i>      | Translation initiation factor 5A (eIF-5A) (Hypusine-containing protein)                                  | 0  | 0 | 13 | 5 | 0  | 0  | 13 | 4  | 13 | 13 | 26 | 1.0 | No dramatic change | 0  | 26 | 0.0   | Soluble only        | 126  | 0  |
| ≥ 2 unique peptides | rmAC3537 | Q5UWZ9_HALMA      | <i>mmhE</i>      | Na/H antiporter subunit                                                                                  | 16 | 8 | 0  | 0 | 10 | 5  | 0  | 0  | 16 | 10 | 26 | 1.6 | No dramatic change | 26 | 0  | 100.0 | Memb only           | 226  | 2  |
| ≥ 2 unique peptides | rmAC2721 | Q5UZ15_HALMA      | <i>cat</i>       | Cation efflux protein                                                                                    | 16 | 4 | 0  | 0 | 10 | 5  | 0  | 0  | 16 | 10 | 26 | 1.6 | No dramatic change | 26 | 0  | 100.0 | Memb only           | 323  | 5  |
| ≥ 2 unique peptides | rmAC3517 | Q5UX17_HALMA      | <i>rrmAC3517</i> | Hypothetical protein                                                                                     | 13 | 5 | 0  | 0 | 12 | 4  | 0  | 0  | 13 | 12 | 25 | 1.1 | No dramatic change | 25 | 0  | 100.0 | Memb only           | 772  | 15 |
| ≥ 2 unique peptides | rmAC1802 | Q5V1B1_HALMA      | <i>rrmAC1802</i> | Hypothetical protein                                                                                     | 12 | 5 | 0  | 0 | 13 | 4  | 0  | 0  | 12 | 13 | 25 | 0.9 | No dramatic change | 25 | 0  | 100.0 | Memb only           | 198  | 3  |
| ≥ 2 unique peptides | rmB0228  | Q5UWE7_HALMA      | <i>rrmB0228</i>  | Hypothetical protein                                                                                     | 11 | 2 | 0  | 0 | 14 | 2  | 0  | 0  | 11 | 14 | 25 | 0.8 | No dramatic change | 25 | 0  | 100.0 | Memb only           | 415  | 0  |
| ≥ 2 unique peptides | rmB0199  | Q5UWH0_HALMA      | <i>pdhB2</i>     | Pyruvate dehydrogenase (EC 1.2.4.1)                                                                      | 5  | 4 | 17 | 5 | 0  | 0  | 3  | 2  | 22 | 3  | 25 | 7.3 | 0.7 (>3X)          | 5  | 20 | 20.0  | Soluble predominant | 338  | 0  |
| ≥ 2 unique peptides | rmAC1017 | Q5V3C0_HALMA      | <i>lpg2</i>      | LPS glycosyltransferase                                                                                  | 17 | 8 | 0  | 0 | 8  | 7  | 0  | 0  | 17 | 8  | 25 | 2.1 | 0.7 (2-3X)         | 25 | 0  | 100.0 | Memb only           | 353  | 0  |
| ≥ 2 unique peptides | rmAC2408 | Q5UZT1_HALMA      | <i>hom</i>       | Homoserine dehydrogenase (EC 1.1.1.3)                                                                    | 0  | 0 | 15 | 6 | 0  | 0  | 10 | 5  | 15 | 10 | 25 | 1.5 | No dramatic change | 0  | 25 | 0.0   | Soluble only        | 314  | 0  |
| ≥ 2 unique peptides | rmAC1497 | Q5V233_HALMA      | <i>nifS</i>      | Selenocysteine lyase (EC 4.4.1.16)                                                                       | 0  | 0 | 14 | 7 | 0  | 0  | 11 | 5  | 14 | 11 | 25 | 1.3 | No dramatic change | 0  | 25 | 0.0   | Soluble only        | 568  | 0  |
| ≥ 2 unique peptides | rmAC0340 | Q5V514_HALMA      | <i>ipmD</i>      | β-isopropylmalate dehydrogenase (EC 1.1.1.85)                                                            | 0  | 0 | 10 | 4 | 0  | 0  | 15 | 6  | 10 | 15 | 25 | 0.7 | No dramatic change | 0  | 25 | 0.0   | Soluble only        | 327  | 0  |
| ≥ 2 unique peptides | rmAC2181 | Q5V0D0_HALMA      | <i>pepB2</i>     | Aminopeptidase                                                                                           | 0  | 0 | 8  | 5 | 0  | 0  | 17 | 6  | 8  | 17 | 25 | 0.5 | 1.2 (2-3X)         | 0  | 25 | 0.0   | Soluble only        | 408  | 0  |
| ≥ 2 unique peptides | rmAC1417 | RLA0_HALMAReview  | <i>rplP0</i>     | 50S ribosomal protein L10E (Ribosomal protein L10) (Acidic ribosomal protein P0 homolog) (L10E) (HMal10) | 0  | 0 | 17 | 7 | 3  | 1  | 5  | 3  | 17 | 8  | 25 | 2.1 | 0.7 (2-3X)         | 3  | 22 | 12.0  | Soluble predominant | 348  | 0  |
| ≥ 2 unique peptides | pNG5052  | Q5V7K5_HALMA      | <i>usp8</i>      | Universal stress protein                                                                                 | 4  | 3 | 8  | 4 | 6  | 4  | 7  | 4  | 12 | 13 | 25 | 0.9 | No dramatic change | 10 | 15 | 40.0  | Memb + Sol          | 138  | 0  |
| ≥ 2 unique peptides | rmB0321  | Q5UW68_HALMA      | <i>phnE</i>      | Phosphonates ABC transporter permease protein                                                            | 22 | 4 | 0  | 0 | 3  | 2  | 0  | 0  | 22 | 3  | 25 | 7.3 | 0.7 (>3X)          | 25 | 0  | 100.0 | Memb only           | 271  | 5  |
| ≥ 2 unique peptides | rmAC1765 | Q5V1E0_HALMA      | <i>tenA</i>      | Transcriptional activator tenA                                                                           | 0  | 0 | 3  | 1 | 1  | 1  | 20 | 6  | 3  | 21 | 24 | 0.1 | 1.2 (>3X)          | 1  | 23 | 4.2   | Soluble predominant | 219  | 0  |
| ≥ 2 unique peptides | rmAC3311 | Q5UXK1_HALMA      | <i>rrmAC3311</i> | Hypothetical protein                                                                                     | 0  | 0 | 13 | 5 | 0  | 0  | 11 | 6  | 13 | 11 | 24 | 1.2 | No dramatic change | 0  | 24 | 0.0   | Soluble only        | 537  | 0  |
| ≥ 2 unique peptides | rmAC0733 | Q5V426_HALMA      | <i>rrmAC0733</i> | Rieske [2Fe-2S] domain protein                                                                           | 12 | 6 | 0  | 0 | 12 | 6  | 0  | 0  | 12 | 12 | 24 | 1.0 | No dramatic change | 24 | 0  | 100.0 | Memb only           | 288  | 0  |
| ≥ 2 unique peptides | rmAC1430 | Q5V295_HALMA      | <i>fbp2</i>      | Cytochrome-like protein                                                                                  | 12 | 2 | 0  | 0 | 12 | 2  | 0  | 0  | 12 | 12 | 24 | 1.0 | No dramatic change | 24 | 0  | 100.0 | Memb only           | 147  | 0  |
| ≥ 2 unique peptides | rmAC0023 | Q5V5U5_HALMA      | <i>gatE</i>      | Glutamyl-tRNA(Gln) amidotransferase subunit E (EC 6.3.5.-)                                               | 0  | 0 | 12 | 6 | 0  | 0  | 12 | 6  | 12 | 12 | 24 | 1.0 | No dramatic change | 0  | 24 | 0.0   | Soluble only        | 623  | 0  |
| ≥ 2 unique peptides | rmAC0128 | Q5V5K2_HALMA      | <i>sdr</i>       | Short chain dehydrogenase                                                                                | 0  | 0 | 10 | 5 | 0  | 0  | 14 | 7  | 10 | 14 | 24 | 0.7 | No dramatic change | 0  | 24 | 0.0   | Soluble only        | 234  | 0  |
| ≥ 2 unique peptides | rmAC2906 | Q5UYK5_HALMA      | <i>htpX1</i>     | Probable protease htpX-like (EC 3.4.24.-)                                                                | 13 | 5 | 0  | 0 | 11 | 5  | 0  | 0  | 13 | 11 | 24 | 1.2 | No dramatic change | 24 | 0  | 100.0 | Memb only           | 292  | 4  |
| ≥ 2 unique peptides | rmAC2047 | Q5V0P9_HALMA      | <i>sppA</i>      | Protease IV-like (EC 3.4.21.-)                                                                           | 11 | 4 | 0  | 0 | 13 | 5  | 0  | 0  | 11 | 13 | 24 | 0.8 | No dramatic change | 24 | 0  | 100.0 | Memb only           | 319  | 1  |
| ≥ 2 unique peptides | rmAC2261 | Q5V062_HALMA      | <i>pepB1</i>     | Aminopeptidase                                                                                           | 0  | 0 | 8  | 4 | 0  | 0  | 16 | 5  | 8  | 16 | 24 | 0.5 | 1.2 (2-3X)         | 0  | 24 | 0.0   | Soluble only        | 341  | 0  |
| ≥ 2 unique peptides | rmAC1856 | Q5V162_HALMA      | <i>rrmAC1856</i> | Putative RNA binding protein                                                                             | 13 | 6 | 0  | 0 | 11 | 5  | 0  | 0  | 13 | 11 | 24 | 1.2 | No dramatic change | 24 | 0  | 100.0 | Memb only           | 394  | 1  |
| ≥ 2 unique peptides | rmB0315  | Q5UW74_HALMA      | <i>msmX-3</i>    | Sugar ABC transporter ATP-binding protein                                                                | 0  | 0 | 0  | 0 | 24 | 10 | 0  | 0  | 0  | 24 | 24 | 0.0 | 1.2 only           | 24 | 0  | 100.0 | Memb only           | 379  | 0  |
| ≥ 2 unique peptides | rmAC0436 | Q5V4T2_HALMA      | <i>traB</i>      | Putative plasmid transfer protein                                                                        | 11 | 5 | 0  | 0 | 13 | 6  | 0  | 0  | 11 | 13 | 24 | 0.8 | No dramatic change | 24 | 0  | 100.0 | Memb only           | 534  | 6  |
| ≥ 2 unique peptides | rmAC0807 | Q5V3V9_HALMA      | <i>cdc48c</i>    | Cell division control protein 48                                                                         | 0  | 0 | 11 | 7 | 0  | 0  | 12 | 8  | 11 | 12 | 23 | 0.9 | No dramatic change | 0  | 23 | 0.0   | Soluble only        | 705  | 0  |
| ≥ 2 unique peptides | rmB0156  | Q5UWK8_HALMA      | <i>rrmB0156</i>  | Sensor protein (EC 2.7.13.3)                                                                             | 19 | 7 | 0  | 0 | 4  | 4  | 0  | 0  | 19 | 4  | 23 | 4.8 | 0.7 (>3X)          | 23 | 0  | 100.0 | Memb only           | 964  | 2  |
| ≥ 2 unique peptides | rmAC3456 | Q5UX70_HALMA      | <i>bcp1</i>      | Bacterioferritin comigrating protein                                                                     | 0  | 0 | 7  | 1 | 0  | 0  | 16 | 2  | 7  | 16 | 23 | 0.4 | 1.2 (2-3X)         | 0  | 23 | 0.0   | Soluble only        | 157  | 0  |

|                     |          |                    |                  |                                                                                                                           |    |   |    |    |    |   |    |   |    |    |    |     |                    |    |    |       |                     |      |    |
|---------------------|----------|--------------------|------------------|---------------------------------------------------------------------------------------------------------------------------|----|---|----|----|----|---|----|---|----|----|----|-----|--------------------|----|----|-------|---------------------|------|----|
| ≥ 2 unique peptides | rmAC0961 | Q5V3H0_HALMA       | <i>rrmAC0961</i> | Hypothetical protein                                                                                                      | 15 | 6 | 0  | 0  | 8  | 5 | 0  | 0 | 15 | 8  | 23 | 1.9 | No dramatic change | 23 | 0  | 100.0 | Memb only           | 274  | 2  |
| ≥ 2 unique peptides | rmAC0955 | Q5V3H6_HALMA       | <i>rrmAC0955</i> | Hypothetical protein                                                                                                      | 11 | 7 | 0  | 0  | 12 | 7 | 0  | 0 | 11 | 12 | 23 | 0.9 | No dramatic change | 23 | 0  | 100.0 | Memb only           | 560  | 6  |
| ≥ 2 unique peptides | pNG7140  | Q5V6K2_HALMA       | <i>pNG7140</i>   | Hypothetical protein                                                                                                      | 0  | 0 | 11 | 5  | 0  | 0 | 12 | 6 | 11 | 12 | 23 | 0.9 | No dramatic change | 0  | 23 | 0.0   | Soluble only        | 149  | 0  |
| ≥ 2 unique peptides | pNG4050  | Q5V7X2_HALMA       | <i>pNG4050</i>   | Hypothetical protein                                                                                                      | 4  | 1 | 6  | 4  | 3  | 1 | 10 | 5 | 10 | 13 | 23 | 0.8 | No dramatic change | 7  | 16 | 30.4  | Memb + Sol          | 265  | 0  |
| ≥ 2 unique peptides | rmAC2085 | Q5V0L5_HALMA       | <i>rrmAC2085</i> | Hypothetical protein                                                                                                      | 2  | 1 | 6  | 1  | 4  | 1 | 11 | 5 | 8  | 15 | 23 | 0.5 | No dramatic change | 6  | 17 | 26.1  | Memb + Sol          | 173  | 0  |
| ≥ 2 unique peptides | rmAC0365 | Q5V4Z3_HALMA       | <i>asd</i>       | Aspartate-semialdehyde dehydrogenase (EC 1.2.1.11)                                                                        | 0  | 0 | 14 | 5  | 0  | 0 | 9  | 4 | 14 | 9  | 23 | 1.6 | No dramatic change | 0  | 23 | 0.0   | Soluble only        | 345  | 0  |
| ≥ 2 unique peptides | rmAC1451 | Q5V275_HALMA       | <i>nodD</i>      | NADH dehydrogenase/oxidoreductase-like protein                                                                            | 10 | 3 | 0  | 0  | 13 | 3 | 0  | 0 | 10 | 13 | 23 | 0.8 | No dramatic change | 23 | 0  | 100.0 | Memb only           | 153  | 0  |
| ≥ 2 unique peptides | rmAC0272 | HISX_HALMARReview  | <i>hisD</i>      | Histidinol dehydrogenase (EC 1.1.1.23) (HDH)                                                                              | 0  | 0 | 10 | 6  | 0  | 0 | 13 | 7 | 10 | 13 | 23 | 0.8 | No dramatic change | 0  | 23 | 0.0   | Soluble only        | 422  | 0  |
| ≥ 2 unique peptides | rmAC0423 | Q5V4U5_HALMA       | <i>rrmAC0423</i> | Arylsulfatase                                                                                                             | 6  | 5 | 3  | 3  | 10 | 7 | 4  | 3 | 9  | 14 | 23 | 0.6 | No dramatic change | 16 | 7  | 69.6  | Memb + Sol          | 444  | 0  |
| ≥ 2 unique peptides | rmB0238  | Q5UWD9_HALMA       | <i>hhd3</i>      | β-hydroxyacyl-CoA dehydrogenase (EC 1.1.1.35)                                                                             | 3  | 3 | 6  | 3  | 1  | 1 | 13 | 4 | 9  | 14 | 23 | 0.6 | No dramatic change | 4  | 19 | 17.4  | Soluble predominant | 295  | 0  |
| ≥ 2 unique peptides | rmAC2776 | Q5UYW8_HALMA       | <i>matE2</i>     | Multi antimicrobial extrusion drug/sodium antiporters                                                                     | 17 | 5 | 0  | 0  | 6  | 2 | 0  | 0 | 17 | 6  | 23 | 2.8 | 0.7 (2>3X)         | 23 | 0  | 100.0 | Memb only           | 419  | 10 |
| ≥ 2 unique peptides | rmAC2464 | Q5UZN2_HALMA       | <i>livF-6</i>    | Branched-chain amino acid ABC transporter ATP-binding protein                                                             | 11 | 3 | 0  | 0  | 11 | 3 | 1  | 1 | 11 | 12 | 23 | 0.9 | No dramatic change | 22 | 1  | 95.7  | Memb predominant    | 240  | 0  |
| ≥ 2 unique peptides | rmAC3132 | Q5UY13_HALMA       | <i>livK-2</i>    | Branched-chain amino acid ABC transporter amino acid-binding protein                                                      | 10 | 3 | 0  | 0  | 13 | 3 | 0  | 0 | 10 | 13 | 23 | 0.8 | No dramatic change | 23 | 0  | 100.0 | Memb only           | 472  | 0  |
| ≥ 2 unique peptides | rmB0314  | Q5UW75_HALMA       | <i>uspE</i>      | Sn-glycerol-3-phosphate transport system permease                                                                         | 0  | 0 | 0  | 0  | 23 | 6 | 0  | 0 | 0  | 23 | 23 | 0.0 | 1.2 only           | 23 | 0  | 100.0 | Memb only           | 307  | 6  |
| ≥ 2 unique peptides | rmAC2116 | Q5V0I6_HALMA       | <i>uvrA</i>      | Excinuclease ABC subunit A                                                                                                | 0  | 0 | 14 | 12 | 0  | 0 | 8  | 7 | 14 | 8  | 22 | 1.8 | No dramatic change | 0  | 22 | 0.0   | Soluble only        | 992  | 0  |
| ≥ 2 unique peptides | rmAC3185 | Q5UXW3_HALMA       | <i>rrmAC3185</i> | Hypothetical protein                                                                                                      | 14 | 5 | 0  | 0  | 8  | 5 | 0  | 0 | 14 | 8  | 22 | 1.8 | No dramatic change | 22 | 0  | 100.0 | Memb only           | 115  | 1  |
| ≥ 2 unique peptides | rmB0304  | Q5UW84_HALMA       | <i>rrmB0304</i>  | Hypothetical protein                                                                                                      | 14 | 6 | 0  | 0  | 8  | 3 | 0  | 0 | 14 | 8  | 22 | 1.8 | No dramatic change | 22 | 0  | 100.0 | Memb only           | 359  | 4  |
| ≥ 2 unique peptides | rmAC2729 | Q5UZ09_HALMA       | <i>rrmAC2729</i> | Hypothetical protein                                                                                                      | 13 | 3 | 0  | 0  | 9  | 3 | 0  | 0 | 13 | 9  | 22 | 1.4 | No dramatic change | 22 | 0  | 100.0 | Memb only           | 124  | 2  |
| ≥ 2 unique peptides | rmAC2492 | Q5UZK7_HALMA       | <i>rrmAC2492</i> | Hypothetical protein                                                                                                      | 12 | 3 | 0  | 0  | 10 | 3 | 0  | 0 | 12 | 10 | 22 | 1.2 | No dramatic change | 22 | 0  | 100.0 | Memb only           | 91   | 0  |
| ≥ 2 unique peptides | rmAC1151 | Q5V300_HALMA       | <i>rrmAC1151</i> | Hypothetical protein                                                                                                      | 12 | 2 | 0  | 0  | 10 | 2 | 0  | 0 | 12 | 10 | 22 | 1.2 | No dramatic change | 22 | 0  | 100.0 | Memb only           | 58   | 2  |
| ≥ 2 unique peptides | rmAC3454 | Q5UX72_HALMA       | <i>rrmAC3454</i> | Hypothetical protein                                                                                                      | 0  | 0 | 11 | 4  | 0  | 0 | 11 | 6 | 11 | 11 | 22 | 1.0 | No dramatic change | 0  | 22 | 0.0   | Soluble only        | 336  | 0  |
| ≥ 2 unique peptides | rmAC2050 | Q5V0P6_HALMA       | <i>rrmAC2050</i> | Hypothetical protein                                                                                                      | 0  | 0 | 8  | 4  | 0  | 0 | 14 | 4 | 8  | 14 | 22 | 0.6 | No dramatic change | 0  | 22 | 0.0   | Soluble only        | 108  | 0  |
| ≥ 2 unique peptides | rmAC2334 | Q5UZZ6_HALMA       | <i>glcD2</i>     | Putative oxidoreductase                                                                                                   | 16 | 9 | 0  | 0  | 6  | 2 | 0  | 0 | 16 | 6  | 22 | 2.7 | 0.7 (2>3X)         | 22 | 0  | 100.0 | Memb only           | 1021 | 0  |
| ≥ 2 unique peptides | rmAC1231 | Q5V2S7_HALMA       | <i>ilvA1</i>     | Threonine dehydratase (EC 4.3.1.19)                                                                                       | 2  | 1 | 10 | 6  | 3  | 1 | 7  | 4 | 12 | 10 | 22 | 1.2 | No dramatic change | 5  | 17 | 22.7  | Soluble predominant | 342  | 0  |
| ≥ 2 unique peptides | rmAC0192 | Q5V5E7_HALMA       | <i>purB</i>      | Adenylosuccinate lyase (EC 4.3.2.2)                                                                                       | 0  | 0 | 11 | 6  | 0  | 0 | 11 | 6 | 11 | 11 | 22 | 1.0 | No dramatic change | 0  | 22 | 0.0   | Soluble only        | 460  | 0  |
| ≥ 2 unique peptides | rmAC0489 | Q5V4N8_HALMA       | <i>pip</i>       | Putative intracellular protease (EC 3.2.-.-)                                                                              | 0  | 0 | 11 | 4  | 0  | 0 | 11 | 3 | 11 | 11 | 22 | 1.0 | No dramatic change | 0  | 22 | 0.0   | Soluble only        | 196  | 0  |
| ≥ 2 unique peptides | rmAC3151 | Q5UXZ5_HALMA       | <i>ubiE1</i>     | Ubiquinone/menaquinone biosynthesis methyltransferase                                                                     | 9  | 2 | 1  | 1  | 8  | 2 | 4  | 1 | 10 | 12 | 22 | 0.8 | No dramatic change | 17 | 5  | 77.3  | Memb predominant    | 206  | 0  |
| ≥ 2 unique peptides | rmAC2369 | PDXT_HALMARReview  | <i>pdxT</i>      | Glutamine amidotransferase subunit pdxT (EC 2.6.-.-) (Glutamineamidotransferase glutaminase subunit pdxT)                 | 0  | 0 | 10 | 4  | 0  | 0 | 12 | 5 | 10 | 12 | 22 | 0.8 | No dramatic change | 0  | 22 | 0.0   | Soluble only        | 197  | 0  |
| ≥ 2 unique peptides | rmAC2610 | Q5UZA4_HALMA       | <i>hemB</i>      | Delta-aminolevulinic acid dehydratase (EC 4.2.1.24)                                                                       | 0  | 0 | 10 | 3  | 0  | 0 | 12 | 5 | 10 | 12 | 22 | 0.8 | No dramatic change | 0  | 22 | 0.0   | Soluble only        | 326  | 0  |
| ≥ 2 unique peptides | rmAC3183 | SYH_HALMARReview   | <i>hisS</i>      | Histidyl-tRNA synthetase (EC 6.1.1.21) (Histidine-tRNA ligase)(HisRS)                                                     | 0  | 0 | 9  | 4  | 0  | 0 | 13 | 7 | 9  | 13 | 22 | 0.7 | No dramatic change | 0  | 22 | 0.0   | Soluble only        | 435  | 0  |
| ≥ 2 unique peptides | pNG7289  | Q5V666_HALMA       | <i>adh6</i>      | Zinc-binding dehydrogenase (EC 1.1.1.1) (EC 1.6.5.5)                                                                      | 0  | 0 | 9  | 4  | 0  | 0 | 13 | 6 | 9  | 13 | 22 | 0.7 | No dramatic change | 0  | 22 | 0.0   | Soluble only        | 338  | 0  |
| ≥ 2 unique peptides | rmAC1490 | Q5V239_HALMA       | <i>cadT</i>      | Cobalamin adenosyltransferase                                                                                             | 0  | 0 | 9  | 4  | 0  | 0 | 13 | 4 | 9  | 13 | 22 | 0.7 | No dramatic change | 0  | 22 | 0.0   | Soluble only        | 178  | 0  |
| ≥ 2 unique peptides | rmAC1289 | Q5V2M6_HALMA       | <i>rrmAC1289</i> | Chelatase                                                                                                                 | 0  | 0 | 8  | 2  | 1  | 1 | 13 | 4 | 8  | 14 | 22 | 0.6 | No dramatic change | 1  | 21 | 4.5   | Soluble predominant | 293  | 0  |
| ≥ 2 unique peptides | rmAC0543 | SYV_HALMARReview   | <i>tyrS</i>      | Tyrosyl-tRNA synthetase (EC 6.1.1.1) (Tyrosine-tRNA ligase) (TyrRS)                                                       | 0  | 0 | 8  | 6  | 0  | 0 | 14 | 7 | 8  | 14 | 22 | 0.6 | No dramatic change | 0  | 22 | 0.0   | Soluble only        | 346  | 0  |
| ≥ 2 unique peptides | rmAC0855 | Q5V3R6_HALMA       | <i>galE4</i>     | UDP-glucose 4-epimerase (EC 5.1.3.2)                                                                                      | 0  | 0 | 7  | 4  | 0  | 0 | 15 | 7 | 7  | 15 | 22 | 0.5 | 1.2 (2-3X)         | 0  | 22 | 0.0   | Soluble only        | 308  | 0  |
| ≥ 2 unique peptides | rmAC1925 | Q5V106_HALMA       | <i>mhpC</i>      | 2-hydroxy-6-ketono-24-dienedioic acid hydrolase (EC 3.7.1.-)                                                              | 5  | 4 | 0  | 0  | 17 | 9 | 0  | 0 | 5  | 17 | 22 | 0.3 | 1.2 (>3X)          | 22 | 0  | 100.0 | Memb only           | 349  | 0  |
| ≥ 2 unique peptides | rmAC3170 | Q5UXX7_HALMA       | <i>rrmAC3170</i> | M50 metalloproteinase                                                                                                     | 11 | 4 | 0  | 0  | 11 | 5 | 0  | 0 | 11 | 11 | 22 | 1.0 | No dramatic change | 22 | 0  | 100.0 | Memb only           | 588  | 7  |
| ≥ 2 unique peptides | rmAC2488 | RS24_HALMARReview  | <i>rps24e</i>    | 30S ribosomal protein S24e (HS15) (E1.2)                                                                                  | 1  | 1 | 15 | 6  | 2  | 1 | 4  | 4 | 16 | 6  | 22 | 2.7 | 0.7 (2>3X)         | 3  | 19 | 13.6  | Soluble predominant | 102  | 0  |
| ≥ 2 unique peptides | rmAC1606 | RL22_HALMARReview  | <i>rpl22p</i>    | 50S ribosomal protein L22P (Hmal22) (HI23)                                                                                | 5  | 2 | 7  | 3  | 10 | 5 | 0  | 0 | 12 | 10 | 22 | 1.2 | No dramatic change | 15 | 7  | 68.2  | Memb + Sol          | 155  | 0  |
| ≥ 2 unique peptides | rmAC2827 | IF2G_HALMARReview  | <i>efl2g</i>     | Translation initiation factor 2 gamma subunit (eIF-2-gamma) (aIF2-gamma)                                                  | 0  | 0 | 11 | 5  | 0  | 0 | 11 | 7 | 11 | 11 | 22 | 1.0 | No dramatic change | 0  | 22 | 0.0   | Soluble only        | 409  | 0  |
| ≥ 2 unique peptides | rmAC2072 | Q5V0M7_HALMA       | <i>vacB</i>      | Ribonuclease R (EC 3.1.-.-)                                                                                               | 0  | 0 | 10 | 6  | 0  | 0 | 12 | 8 | 10 | 12 | 22 | 0.8 | No dramatic change | 0  | 22 | 0.0   | Soluble only        | 457  | 0  |
| ≥ 2 unique peptides | rmAC2710 | Q5UZ25_HALMA       | <i>gfp3</i>      | GTP-binding proteinlike                                                                                                   | 16 | 9 | 0  | 0  | 6  | 3 | 0  | 0 | 16 | 6  | 22 | 2.7 | 0.7 (2>3X)         | 22 | 0  | 100.0 | Memb only           | 213  | 0  |
| ≥ 2 unique peptides | rmAC1505 | PSTB1_HALMARReview | <i>pstB1</i>     | Phosphate import ATP-binding protein pstB 1 (EC 3.6.3.27) (Phosphate-transporting ATPase 1) (ABC phosphate transporter 1) | 18 | 4 | 0  | 0  | 4  | 3 | 0  | 0 | 18 | 4  | 22 | 4.5 | 0.7 (>3X)          | 22 | 0  | 100.0 | Memb only           | 299  | 0  |
| ≥ 2 unique peptides | rmAC2349 | Q5UZY4_HALMA       | <i>malE1</i>     | Maltose ABC transporter maltose-binding protein                                                                           | 11 | 4 | 0  | 0  | 11 | 4 | 0  | 0 | 11 | 11 | 22 | 1.0 | No dramatic change | 22 | 0  | 100.0 | Memb only           | 426  | 0  |
| ≥ 2 unique peptides | rmAC2965 | Q5UYF5_HALMA       | <i>trpS</i>      | Tryptophanyl-tRNA synthetase (EC 6.1.1.2)                                                                                 | 0  | 0 | 11 | 4  | 0  | 0 | 11 | 6 | 11 | 11 | 22 | 1.0 | No dramatic change | 0  | 22 | 0.0   | Soluble only        | 549  | 0  |
| ≥ 2 unique peptides | rmAC2154 | Q5V0F5_HALMA       | <i>rrmAC2154</i> | Hypothetical protein                                                                                                      | 11 | 3 | 0  | 0  | 10 | 5 | 0  | 0 | 11 | 10 | 21 | 1.1 | No dramatic change | 21 | 0  | 100.0 | Memb only           | 137  | 1  |
| ≥ 2 unique peptides | rmAC3269 | Q5UXN8_HALMA       | <i>rrmAC3269</i> | Hypothetical protein                                                                                                      | 0  | 0 | 11 | 4  | 0  | 0 | 10 | 4 | 11 | 10 | 21 | 1.1 | No dramatic change | 0  | 21 | 0.0   | Soluble only        | 84   | 0  |
| ≥ 2 unique peptides | rmAC0856 | Q5V3R5_HALMA       | <i>rrmAC0856</i> | Hypothetical protein                                                                                                      | 10 | 6 | 0  | 0  | 11 | 5 | 0  | 0 | 10 | 11 | 21 | 0.9 | No dramatic change | 21 | 0  | 100.0 | Memb only           | 222  | 0  |
| ≥ 2 unique peptides | rmAC1348 | Q5V2H3_HALMA       | <i>rrmAC1348</i> | Hypothetical protein                                                                                                      | 0  | 0 | 10 | 2  | 1  | 1 | 10 | 2 | 10 | 11 | 21 | 0.9 | No dramatic change | 1  | 20 | 4.8   | Soluble predominant | 82   | 0  |
| ≥ 2 unique peptides | rmAC1032 | Q5V3A5_HALMA       | <i>rrmAC1032</i> | Hypothetical protein                                                                                                      | 9  | 4 | 0  | 0  | 12 | 5 | 0  | 0 | 9  | 12 | 21 | 0.8 | No dramatic change | 21 | 0  | 100.0 | Memb only           | 337  | 5  |
| ≥ 2 unique peptides | rmAC0117 | Q5V5L0_HALMA       | <i>rrmAC0117</i> | Hypothetical protein                                                                                                      | 9  | 4 | 0  | 0  | 12 | 5 | 0  | 0 | 9  | 12 | 21 | 0.8 | No dramatic change | 21 | 0  | 100.0 | Memb only           | 99   | 0  |
| ≥ 2 unique peptides | rmAC1350 | Q5V2H1_HALMA       | <i>gtr-4</i>     | Putative sugar transferase                                                                                                | 15 | 6 | 0  | 0  | 6  | 3 | 0  | 0 | 15 | 6  | 21 | 2.5 | 0.7 (2>3X)         | 21 | 0  | 100.0 | Memb only           | 396  | 0  |
| ≥ 2 unique peptides | rmAC1186 | Q5V2W7_HALMA       | <i>moaE</i>      | Molybdenum cofactor biosynthesis protein                                                                                  | 0  | 0 | 12 | 8  | 0  | 0 | 9  | 7 | 12 | 9  | 21 | 1.3 | No dramatic change | 0  | 21 | 0.0   | Soluble only        | 275  | 0  |
| ≥ 2 unique peptides | rmAC3062 | Q5UY73_HALMA       | <i>moxR5</i>     | Methanol dehydrogenase regulatory protein                                                                                 | 4  | 3 | 6  | 4  | 5  | 4 | 6  | 3 | 10 | 11 | 21 | 0.9 | No dramatic change | 9  | 12 | 42.9  | Memb + Sol          | 343  | 0  |

|                     |          |                   |          |                                                                                                                 |    |   |    |   |    |   |    |    |    |    |    |     |                    |    |    |       |                     |     |   |
|---------------------|----------|-------------------|----------|-----------------------------------------------------------------------------------------------------------------|----|---|----|---|----|---|----|----|----|----|----|-----|--------------------|----|----|-------|---------------------|-----|---|
| ≥ 2 unique peptides | rmAC0085 | SYE_HALMARReview  | glx      | Glutamyl-tRNA synthetase (EC 6.1.1.17) (Glutamate-tRNA ligase)(GluRS)                                           | 0  | 0 | 10 | 6 | 0  | 0 | 11 | 5  | 10 | 11 | 21 | 0.9 | No dramatic change | 0  | 21 | 0.0   | Soluble only        | 579 | 0 |
| ≥ 2 unique peptides | rmAC2949 | QSUYH0_HALMA      | hsp20a   | Small heat shock protein                                                                                        | 1  | 1 | 10 | 3 | 3  | 2 | 7  | 3  | 11 | 10 | 21 | 1.1 | No dramatic change | 4  | 17 | 19.0  | Soluble predominant | 135 | 0 |
| ≥ 2 unique peptides | rmAC2357 | RL10_HALMARReview | rpl10e   | 50S ribosomal protein L10e                                                                                      | 14 | 7 | 0  | 0 | 7  | 3 | 0  | 0  | 14 | 7  | 21 | 2.0 | 0.7 (>3X)          | 21 | 0  | 100.0 | Memb only           | 177 | 0 |
| ≥ 2 unique peptides | rmAC2212 | RS6E_HALMARReview | rps6e    | 30S ribosomal protein S6e (HS13)                                                                                | 0  | 0 | 14 | 5 | 0  | 0 | 7  | 4  | 14 | 7  | 21 | 2.0 | 0.7 (>3X)          | 0  | 21 | 0.0   | Soluble only        | 129 | 0 |
| ≥ 2 unique peptides | rmAC1511 | RS8E_HALMARReview | rps8e    | 30S ribosomal protein S8e (HS23)                                                                                | 3  | 1 | 9  | 5 | 9  | 5 | 0  | 0  | 12 | 9  | 21 | 1.3 | No dramatic change | 12 | 9  | 57.1  | Memb + Sol          | 123 | 0 |
| ≥ 2 unique peptides | rmAC3512 | IF2A_HALMARReview | ejf2a    | Translation initiation factor 2 alpha subunit (eIF-2-alpha) (aIF2-alpha)                                        | 0  | 0 | 8  | 2 | 0  | 0 | 13 | 4  | 8  | 13 | 21 | 0.6 | No dramatic change | 0  | 21 | 0.0   | Soluble only        | 266 | 0 |
| ≥ 2 unique peptides | rmAC0700 | SECE_HALMARReview | secE     | Preprotein translocase subunit secE (Protein transport protein SEC61 gamma subunit homolog)                     | 12 | 2 | 0  | 0 | 9  | 2 | 0  | 0  | 12 | 9  | 21 | 1.3 | No dramatic change | 21 | 0  | 100.0 | Memb only           | 59  | 1 |
| ≥ 2 unique peptides | pNG6079  | Q5V738_HALMA      | czcD     | Cation efflux system protein                                                                                    | 10 | 3 | 0  | 0 | 11 | 3 | 0  | 0  | 10 | 11 | 21 | 0.9 | No dramatic change | 21 | 0  | 100.0 | Memb only           | 311 | 6 |
| ≥ 2 unique peptides | rmAC0933 | Q5V3J6_HALMA      | argK     | ArgK protein                                                                                                    | 0  | 0 | 9  | 4 | 0  | 0 | 12 | 7  | 9  | 12 | 21 | 0.8 | No dramatic change | 0  | 21 | 0.0   | Soluble only        | 352 | 0 |
| ≥ 2 unique peptides | rmAC2818 | QSUY59_HALMA      | ftsH     | Cell division protein FtsH (EC 3.4.24.-)                                                                        | 2  | 2 | 11 | 7 | 0  | 0 | 7  | 6  | 13 | 7  | 20 | 1.9 | No dramatic change | 2  | 18 | 10.0  | Soluble predominant | 492 | 0 |
| ≥ 2 unique peptides | rmAC2179 | Q5V0D2_HALMA      | fer2     | 2Fe-2S iron-sulfur cluster binding domain                                                                       | 9  | 3 | 0  | 0 | 11 | 3 | 0  | 0  | 9  | 11 | 20 | 0.8 | No dramatic change | 20 | 0  | 100.0 | Memb only           | 194 | 0 |
| ≥ 2 unique peptides | rmAC1696 | Q5V1J9_HALMA      | rmAC1696 | Hypothetical protein                                                                                            | 14 | 7 | 0  | 0 | 6  | 3 | 0  | 0  | 14 | 6  | 20 | 2.3 | 0.7 (>3X)          | 20 | 0  | 100.0 | Memb only           | 618 | 7 |
| ≥ 2 unique peptides | rmAC1219 | Q5V2T9_HALMA      | rmAC1219 | Hypothetical protein                                                                                            | 14 | 7 | 0  | 0 | 6  | 3 | 0  | 0  | 14 | 6  | 20 | 2.3 | 0.7 (>3X)          | 20 | 0  | 100.0 | Memb only           | 788 | 2 |
| ≥ 2 unique peptides | rmAC1481 | Q5V246_HALMA      | rmAC1481 | Hypothetical protein                                                                                            | 0  | 0 | 10 | 6 | 0  | 0 | 10 | 6  | 10 | 10 | 20 | 1.0 | No dramatic change | 0  | 20 | 0.0   | Soluble only        | 364 | 0 |
| ≥ 2 unique peptides | pNG7051  | Q5V6T2_HALMA      | pNG7051  | Hypothetical protein                                                                                            | 8  | 3 | 0  | 0 | 12 | 4 | 0  | 0  | 8  | 12 | 20 | 0.7 | No dramatic change | 20 | 0  | 100.0 | Memb only           | 441 | 8 |
| ≥ 2 unique peptides | rmAC0383 | Q5V4X7_HALMA      | arg2     | Arginase (EC 3.5.3.1)                                                                                           | 0  | 0 | 16 | 8 | 0  | 0 | 4  | 3  | 16 | 4  | 20 | 4.0 | 0.7 (>3X)          | 0  | 20 | 0.0   | Soluble only        | 315 | 0 |
| ≥ 2 unique peptides | rmAC1356 | Q5V2G5_HALMA      | gatC     | Glutamyl-tRNA(Gln) amidotransferase subunit C (EC 6.3.5.-)                                                      | 0  | 0 | 9  | 4 | 0  | 0 | 11 | 5  | 9  | 11 | 20 | 0.8 | No dramatic change | 0  | 20 | 0.0   | Soluble only        | 92  | 0 |
| ≥ 2 unique peptides | rmAC1789 | Q5V1C2_HALMA      | hutG     | Probable formimidoylglutamate (EC 3.5.3.8)                                                                      | 0  | 0 | 9  | 3 | 0  | 0 | 11 | 3  | 9  | 11 | 20 | 0.8 | No dramatic change | 0  | 20 | 0.0   | Soluble only        | 307 | 0 |
| ≥ 2 unique peptides | rmAC1960 | Q5V0X5_HALMA      | graD4b   | Glucose-1-phosphate thymidyltransferase                                                                         | 0  | 0 | 7  | 4 | 0  | 0 | 13 | 5  | 7  | 13 | 20 | 0.5 | No dramatic change | 0  | 20 | 0.0   | Soluble only        | 314 | 0 |
| ≥ 2 unique peptides | rmAC2701 | Q5U233_HALMA      | glyS     | Glycyl-tRNA synthetase (EC 6.1.1.14)                                                                            | 0  | 0 | 6  | 4 | 0  | 0 | 14 | 9  | 6  | 14 | 20 | 0.4 | 1.2 (2-3X)         | 0  | 20 | 0.0   | Soluble only        | 614 | 0 |
| ≥ 2 unique peptides | rmAC0517 | Q5V4L5_HALMA      | alaS2    | Alanyl-tRNA synthetase (EC 6.1.1.7)                                                                             | 0  | 0 | 6  | 4 | 0  | 0 | 14 | 8  | 6  | 14 | 20 | 0.4 | 1.2 (2-3X)         | 0  | 20 | 0.0   | Soluble only        | 419 | 0 |
| ≥ 2 unique peptides | rmB0243  | Q5UWD5_HALMA      | paaK1    | Phenylacetyl-coenzyme A ligase                                                                                  | 0  | 0 | 5  | 4 | 0  | 0 | 15 | 10 | 5  | 15 | 20 | 0.3 | 1.2 (>3X)          | 0  | 20 | 0.0   | Soluble only        | 429 | 0 |
| ≥ 2 unique peptides | rmAC3190 | Q5UXV8_HALMA      | pan1     | Proteasome-activating nucleotidase 1                                                                            | 0  | 0 | 12 | 5 | 1  | 1 | 7  | 5  | 12 | 8  | 20 | 1.5 | No dramatic change | 1  | 19 | 5.0   | Soluble predominant | 406 | 0 |
| ≥ 2 unique peptides | pNG7253  | Q5V698_HALMA      | rbsC-1   | Sugar ABC transporter permease protein                                                                          | 12 | 3 | 0  | 0 | 8  | 3 | 0  | 0  | 12 | 8  | 20 | 1.5 | No dramatic change | 20 | 0  | 100.0 | Memb only           | 366 | 8 |
| ≥ 2 unique peptides | rmAC2565 | RFCS_HALMARReview | rfcS     | Replication factor C small subunit (RFC small subunit) (Clamp loaders small subunit)                            | 0  | 0 | 12 | 7 | 0  | 0 | 7  | 4  | 12 | 7  | 19 | 1.7 | No dramatic change | 0  | 19 | 0.0   | Soluble only        | 325 | 0 |
| ≥ 2 unique peptides | rmAC2779 | Q5UYW6_HALMA      | asnC1    | Transcription regulator AsnC family                                                                             | 0  | 0 | 10 | 6 | 0  | 0 | 9  | 6  | 10 | 9  | 19 | 1.1 | No dramatic change | 0  | 19 | 0.0   | Soluble only        | 152 | 0 |
| ≥ 2 unique peptides | rmAC3290 | Q5UXL9_HALMA      | trh5     | Transcription regulator                                                                                         | 0  | 0 | 9  | 6 | 0  | 0 | 10 | 6  | 9  | 10 | 19 | 0.9 | No dramatic change | 0  | 19 | 0.0   | Soluble only        | 76  | 0 |
| ≥ 2 unique peptides | rmAC0801 | Q5V3W4_HALMA      | rmAC0801 | Hypothetical protein                                                                                            | 11 | 3 | 4  | 2 | 4  | 2 | 0  | 0  | 15 | 4  | 19 | 3.8 | 0.7 (>3X)          | 15 | 4  | 78.9  | Memb predominant    | 356 | 0 |
| ≥ 2 unique peptides | rmAC2884 | Q5UYM2_HALMA      | rmAC2884 | Hypothetical protein                                                                                            | 11 | 4 | 0  | 0 | 8  | 4 | 0  | 0  | 11 | 8  | 19 | 1.4 | No dramatic change | 19 | 0  | 100.0 | Memb only           | 185 | 0 |
| ≥ 2 unique peptides | rmAC1035 | Q5V3A2_HALMA      | rmAC1035 | Hypothetical protein                                                                                            | 9  | 2 | 0  | 0 | 9  | 2 | 1  | 1  | 9  | 10 | 19 | 0.9 | No dramatic change | 18 | 1  | 94.7  | Memb predominant    | 565 | 1 |
| ≥ 2 unique peptides | pNG7131  | Q5V6L0_HALMA      | pNG7131  | Hypothetical protein                                                                                            | 0  | 0 | 9  | 2 | 0  | 0 | 10 | 3  | 9  | 10 | 19 | 0.9 | No dramatic change | 0  | 19 | 0.0   | Soluble only        | 146 | 0 |
| ≥ 2 unique peptides | rmAC0399 | Q5V4W6_HALMA      | rmAC0399 | Hypothetical protein                                                                                            | 0  | 0 | 8  | 5 | 0  | 0 | 11 | 5  | 8  | 11 | 19 | 0.7 | No dramatic change | 0  | 19 | 0.0   | Soluble only        | 365 | 0 |
| ≥ 2 unique peptides | rmB0175  | Q5UWJ2_HALMA      | imd2     | Inosine monophosphate dehydrogenase (EC 1.1.1.205)                                                              | 13 | 5 | 0  | 0 | 6  | 4 | 0  | 0  | 13 | 6  | 19 | 2.2 | 0.7 (>3X)          | 19 | 0  | 100.0 | Memb only           | 356 | 3 |
| ≥ 2 unique peptides | rmAC2912 | Q5UYK1_HALMA      | gsp      | General stress protein 69                                                                                       | 0  | 0 | 12 | 5 | 0  | 0 | 7  | 6  | 12 | 7  | 19 | 1.7 | No dramatic change | 0  | 19 | 0.0   | Soluble only        | 350 | 0 |
| ≥ 2 unique peptides | rmAC3003 | Q5UYC3_HALMA      | cbiG     | Cobalamin biosynthesis protein G                                                                                | 0  | 0 | 12 | 6 | 0  | 0 | 7  | 4  | 12 | 7  | 19 | 1.7 | No dramatic change | 0  | 19 | 0.0   | Soluble only        | 323 | 0 |
| ≥ 2 unique peptides | rmAC0124 | Q5V5K5_HALMA      | aroC     | Chorismate synthase (EC 4.2.3.5) (5-enolpyruvylshikimate-3-phosphatephospholyase)                               | 0  | 0 | 12 | 4 | 0  | 0 | 7  | 4  | 12 | 7  | 19 | 1.7 | No dramatic change | 0  | 19 | 0.0   | Soluble only        | 399 | 0 |
| ≥ 2 unique peptides | rmAC2628 | GSA_HALMARReview  | hemL     | Glutamate-1-semialdehyde 2,1-aminomutase (EC 5.4.3.8) (GSA)(Glutamate-1-semialdehyde aminotransferase) (GSA-AT) | 0  | 0 | 10 | 6 | 0  | 0 | 9  | 4  | 10 | 9  | 19 | 1.1 | No dramatic change | 0  | 19 | 0.0   | Soluble only        | 445 | 0 |
| ≥ 2 unique peptides | rmAC2471 | Q5UZM6_HALMA      | yusM     | Proline dehydrogenase                                                                                           | 2  | 2 | 7  | 6 | 5  | 4 | 5  | 3  | 9  | 10 | 19 | 0.9 | No dramatic change | 7  | 12 | 36.8  | Memb + Sol          | 278 | 0 |
| ≥ 2 unique peptides | rmAC2950 | Q5UYG9_HALMA      | pheA     | Prephenate dehydratase (EC 4.2.1.51)                                                                            | 0  | 0 | 9  | 5 | 0  | 0 | 10 | 6  | 9  | 10 | 19 | 0.9 | No dramatic change | 0  | 19 | 0.0   | Soluble only        | 271 | 0 |
| ≥ 2 unique peptides | rmAC0207 | DAPA_HALMARReview | dapA     | Dihydrodipicolinate synthase (EC 4.2.1.52) (DHDPS)                                                              | 0  | 0 | 9  | 5 | 0  | 0 | 10 | 5  | 9  | 10 | 19 | 0.9 | No dramatic change | 0  | 19 | 0.0   | Soluble only        | 306 | 0 |
| ≥ 2 unique peptides | rmAC1446 | Q5V280_HALMA      | purE     | Phosphoribosylaminoimidazole carboxylase catalytic subunit(EC 4.1.1.21)                                         | 0  | 0 | 8  | 6 | 0  | 0 | 11 | 6  | 8  | 11 | 19 | 0.7 | No dramatic change | 0  | 19 | 0.0   | Soluble only        | 216 | 0 |
| ≥ 2 unique peptides | rmAC1879 | Q5V143_HALMA      | aroB     | 3-dehydroquinate synthase (EC 4.2.3.4)                                                                          | 0  | 0 | 7  | 6 | 0  | 0 | 12 | 6  | 7  | 12 | 19 | 0.6 | No dramatic change | 0  | 19 | 0.0   | Soluble only        | 388 | 0 |
| ≥ 2 unique peptides | rmAC0261 | EF1B_HALMARReview | ef1b     | Elongation factor 1-beta (EF-1-beta) (aEF-1beta)                                                                | 0  | 0 | 13 | 4 | 0  | 0 | 6  | 2  | 13 | 6  | 19 | 2.2 | 0.7 (>3X)          | 0  | 19 | 0.0   | Soluble only        | 88  | 0 |
| ≥ 2 unique peptides | rmAC0758 | Q5V403_HALMA      | usp17    | Universal stress protein                                                                                        | 3  | 2 | 4  | 3 | 5  | 2 | 7  | 3  | 7  | 12 | 19 | 0.6 | No dramatic change | 8  | 11 | 42.1  | Memb + Sol          | 151 | 0 |
| ≥ 2 unique peptides | rmAC0754 | Q5V407_HALMA      | trkA1    | Trk potassium uptake system protein                                                                             | 6  | 3 | 4  | 2 | 5  | 2 | 4  | 2  | 10 | 9  | 19 | 1.1 | No dramatic change | 11 | 8  | 57.9  | Memb + Sol          | 227 | 0 |
| ≥ 2 unique peptides | rmAC0251 | Q5V594_HALMA      | yvrO-2   | ABC transporter ATP-binding protein                                                                             | 9  | 3 | 0  | 0 | 10 | 3 | 0  | 0  | 9  | 10 | 19 | 0.9 | No dramatic change | 19 | 0  | 100.0 | Memb only           | 227 | 0 |
| ≥ 2 unique peptides | rmAC0566 | Q5V4H2_HALMA      | livK-1   | Branched chain amino acid ABC transporter branched chain amino acid-binding protein                             | 6  | 4 | 0  | 0 | 13 | 5 | 0  | 0  | 6  | 13 | 19 | 0.5 | 1.2 (2-3X)         | 19 | 0  | 100.0 | Memb only           | 470 | 0 |
| ≥ 2 unique peptides | rmAC3284 | Q5UXM5_HALMA      | ftsZ5    | Cell division protein                                                                                           | 3  | 3 | 5  | 4 | 3  | 3 | 7  | 5  | 8  | 10 | 18 | 0.8 | No dramatic change | 6  | 12 | 33.3  | Memb + Sol          | 393 | 0 |
| ≥ 2 unique peptides | rmAC0185 | Q5VF33_HALMA      | rmAC0185 | Hypothetical protein                                                                                            | 12 | 4 | 0  | 0 | 6  | 3 | 0  | 0  | 12 | 6  | 18 | 2.0 | 0.7 (>3X)          | 18 | 0  | 100.0 | Memb only           | 238 | 1 |
| ≥ 2 unique peptides | rmAC1168 | Q5V2Y3_HALMA      | rmAC1168 | Hypothetical protein                                                                                            | 0  | 0 | 8  | 5 | 0  | 0 | 10 | 4  | 8  | 10 | 18 | 0.8 | No dramatic change | 0  | 18 | 0.0   | Soluble only        | 480 | 0 |
| ≥ 2 unique peptides | rmAC2373 | Q5UZW4_HALMA      | rmAC2373 | Hypothetical protein                                                                                            | 0  | 0 | 6  | 3 | 0  | 0 | 12 | 3  | 6  | 12 | 18 | 0.5 | 1.2 (2-3X)         | 0  | 18 | 0.0   | Soluble only        | 105 | 0 |
| ≥ 2 unique peptides | rmB0006  | Q5UWY2_HALMA      | rmB0006  | Acetamidase/formamidase family protein                                                                          | 0  | 0 | 15 | 5 | 0  | 0 | 3  | 2  | 15 | 3  | 18 | 5.0 | 0.7 (>3X)          | 0  | 18 | 0.0   | Soluble only        | 302 | 0 |
| ≥ 2 unique peptides | rmB0257  | Q5UWC3_HALMA      | citE2    | Citrate lyase beta chain (EC 4.1.3.6) (EC 4.1.2.20)                                                             | 0  | 0 | 12 | 5 | 0  | 0 | 6  | 3  | 12 | 6  | 18 | 2.0 | 0.7 (>3X)          | 0  | 18 | 0.0   | Soluble only        | 295 | 0 |
| ≥ 2 unique peptides | rmAC2741 | Q5UYZ8_HALMA      | ywjD2    | Glucose dehydrogenase (EC 1.1.1.47)                                                                             | 0  | 0 | 12 | 4 | 0  | 0 | 6  | 4  | 12 | 6  | 18 | 2.0 | 0.7 (>3X)          | 0  | 18 | 0.0   | Soluble only        | 260 | 0 |



|                     |          |                    |                  |                                                                                                                                 |    |   |    |   |    |   |    |   |    |    |    |     |                    |    |    |       |                     |     |    |
|---------------------|----------|--------------------|------------------|---------------------------------------------------------------------------------------------------------------------------------|----|---|----|---|----|---|----|---|----|----|----|-----|--------------------|----|----|-------|---------------------|-----|----|
| ≥ 2 unique peptides | rmAC3529 | Q5UX07_HALMA       | <i>rrnAC3529</i> | NADH-ubiquinone/plastoquinone                                                                                                   | 11 | 6 | 0  | 0 | 7  | 5 | 0  | 0 | 11 | 7  | 18 | 1.6 | No dramatic change | 18 | 0  | 100.0 | Memb only           | 593 | 16 |
| ≥ 2 unique peptides | rmAC3434 | Q5UX90_HALMA       | <i>udp1</i>      | Uridine phosphorylase (EC 2.4.2.3)                                                                                              | 0  | 0 | 11 | 5 | 0  | 0 | 7  | 2 | 11 | 7  | 18 | 1.6 | No dramatic change | 0  | 18 | 0.0   | Soluble only        | 241 | 0  |
| ≥ 2 unique peptides | rmAC0370 | Q5V4Y9_HALMA       | <i>lbp</i>       | Leucine-binding protein                                                                                                         | 10 | 2 | 0  | 0 | 8  | 3 | 0  | 0 | 10 | 8  | 18 | 1.3 | No dramatic change | 18 | 0  | 100.0 | Memb only           | 456 | 0  |
| ≥ 2 unique peptides | rmAC1233 | METK_HALMARReview  | <i>mat</i>       | S-adenosylmethionine synthetase (EC 2.5.1.6) (Methionineadenosyltransferase) (AdoMet synthetase)                                | 0  | 0 | 10 | 4 | 0  | 0 | 8  | 4 | 10 | 8  | 18 | 1.3 | No dramatic change | 0  | 18 | 0.0   | Soluble only        | 400 | 0  |
| ≥ 2 unique peptides | rmAC0267 | Q5V578_HALMA       | <i>imd1</i>      | Inosine monophosphate dehydrogenase (EC 1.1.1.205)                                                                              | 0  | 0 | 10 | 3 | 0  | 0 | 8  | 2 | 10 | 8  | 18 | 1.3 | No dramatic change | 0  | 18 | 0.0   | Soluble only        | 126 | 0  |
| ≥ 2 unique peptides | rmAC3246 | Q5UXQ9_HALMA       | <i>sqdB</i>      | UDP-sulfoquinovose synthase                                                                                                     | 0  | 0 | 8  | 5 | 0  | 0 | 10 | 5 | 8  | 10 | 18 | 0.8 | No dramatic change | 0  | 18 | 0.0   | Soluble only        | 390 | 0  |
| ≥ 2 unique peptides | rmAC1984 | Q5V0V4_HALMA       | <i>fabG4</i>     | 3-oxoacyl-[acyl-carrier protein] reductase (EC 1.1.1.100)                                                                       | 0  | 0 | 8  | 3 | 0  | 0 | 10 | 5 | 8  | 10 | 18 | 0.8 | No dramatic change | 0  | 18 | 0.0   | Soluble only        | 269 | 0  |
| ≥ 2 unique peptides | rmAC0109 | Q5V5L8_HALMA       | <i>msrB</i>      | Peptide methionine sulfoxide reductase msrB (EC 1.8.4.6)                                                                        | 0  | 0 | 7  | 4 | 0  | 0 | 11 | 4 | 7  | 11 | 18 | 0.6 | No dramatic change | 0  | 18 | 0.0   | Soluble only        | 134 | 0  |
| ≥ 2 unique peptides | rmAC1603 | RS17_HALMARReview  | <i>rps17p</i>    | 30S ribosomal protein S17P (HmaS17) (HS14)                                                                                      | 0  | 0 | 10 | 5 | 1  | 1 | 7  | 4 | 10 | 8  | 18 | 1.3 | No dramatic change | 1  | 17 | 5.6   | Soluble predominant | 112 | 0  |
| ≥ 2 unique peptides | rmAC2445 | SUI1_HALMARReview  | <i>sui1</i>      | Protein translation factor SUI1 homolog                                                                                         | 0  | 0 | 9  | 3 | 0  | 0 | 9  | 4 | 9  | 9  | 18 | 1.0 | No dramatic change | 0  | 18 | 0.0   | Soluble only        | 97  | 0  |
| ≥ 2 unique peptides | pNG7169  | Q5V6H7_HALMA       | <i>nhaC4</i>     | Na <sup>+</sup> /H <sup>+</sup> antiporter                                                                                      | 12 | 2 | 0  | 0 | 6  | 2 | 0  | 0 | 12 | 6  | 18 | 2.0 | 0.7 (>3X)          | 18 | 0  | 100.0 | Memb only           | 488 | 9  |
| ≥ 2 unique peptides | rmAC0380 | Q5V4Y0_HALMA       | <i>glnP</i>      | Glutamine-binding periplasmic protein of glutamine ABCtransporter                                                               | 9  | 4 | 0  | 0 | 9  | 4 | 0  | 0 | 9  | 9  | 18 | 1.0 | No dramatic change | 18 | 0  | 100.0 | Memb only           | 226 | 4  |
| ≥ 2 unique peptides | rmAC3214 | Q5UXT6_HALMA       | <i>secF</i>      | Protein-export membrane protein SecF                                                                                            | 8  | 4 | 0  | 0 | 10 | 6 | 0  | 0 | 8  | 10 | 18 | 0.8 | No dramatic change | 18 | 0  | 100.0 | Memb only           | 311 | 6  |
| ≥ 2 unique peptides | rmAC2073 | Q5V0M6_HALMA       | <i>trp2</i>      | ABC transporter ATP-binding protein                                                                                             | 8  | 3 | 0  | 0 | 10 | 6 | 0  | 0 | 8  | 10 | 18 | 0.8 | No dramatic change | 18 | 0  | 100.0 | Memb only           | 246 | 0  |
| ≥ 2 unique peptides | rmAC1655 | Q5VIN4_HALMA       | <i>nosF-2</i>    | ABC transporter ATP-binding protein                                                                                             | 7  | 3 | 0  | 0 | 11 | 4 | 0  | 0 | 7  | 11 | 18 | 0.6 | No dramatic change | 18 | 0  | 100.0 | Memb only           | 224 | 0  |
| ≥ 2 unique peptides | rmAC3129 | Q5UY15_HALMA       | <i>livM-6</i>    | Branched-chain amino acid ABC transporter permease protein                                                                      | 7  | 2 | 0  | 0 | 11 | 2 | 0  | 0 | 7  | 11 | 18 | 0.6 | No dramatic change | 18 | 0  | 100.0 | Memb only           | 363 | 9  |
| ≥ 2 unique peptides | rmAC0455 | Q5V4R7_HALMA       | <i>gyrA</i>      | DNA gyrase subunit A (EC 5.99.1.3)                                                                                              | 0  | 0 | 13 | 7 | 0  | 0 | 4  | 3 | 13 | 4  | 17 | 3.3 | 0.7 (>3X)          | 0  | 17 | 0.0   | Soluble only        | 814 | 0  |
| ≥ 2 unique peptides | rmAC0669 | Q5V479_HALMA       | <i>polX</i>      | DNA polymerase IV                                                                                                               | 0  | 0 | 9  | 5 | 0  | 0 | 8  | 5 | 9  | 8  | 17 | 1.1 | No dramatic change | 0  | 17 | 0.0   | Soluble only        | 578 | 0  |
| ≥ 2 unique peptides | rmAC3443 | Q5UX81_HALMA       | <i>rrnAC3443</i> | Hypothetical protein                                                                                                            | 0  | 0 | 7  | 3 | 0  | 0 | 10 | 5 | 7  | 10 | 17 | 0.7 | No dramatic change | 0  | 17 | 0.0   | Soluble only        | 199 | 0  |
| ≥ 2 unique peptides | rmAC0430 | Q5V4T8_HALMA       | <i>exoM</i>      | Succinoglycan biosynthesis protein                                                                                              | 14 | 7 | 0  | 0 | 3  | 2 | 0  | 0 | 14 | 3  | 17 | 4.7 | 0.7 (>3X)          | 17 | 0  | 100.0 | Memb only           | 324 | 1  |
| ≥ 2 unique peptides | rmB0083  | Q5UWR4_HALMA       | <i>ski-1</i>     | Putative 2-component system sensor kinase                                                                                       | 13 | 3 | 0  | 0 | 4  | 1 | 0  | 0 | 13 | 4  | 17 | 3.3 | 0.7 (>3X)          | 17 | 0  | 100.0 | Memb only           | 247 | 4  |
| ≥ 2 unique peptides | rmAC1025 | Q5V3B2_HALMA       | <i>moxR6</i>     | Methanol dehydrogenase regulatory protein                                                                                       | 5  | 3 | 8  | 5 | 1  | 1 | 3  | 2 | 13 | 4  | 17 | 3.3 | 0.7 (>3X)          | 6  | 11 | 35.3  | Memb + Sol          | 336 | 0  |
| ≥ 2 unique peptides | rmAC1370 | Q5V2F3_HALMA       | <i>ccmF</i>      | Cytochrome c-type biogenesis protein CcmF                                                                                       | 9  | 5 | 0  | 0 | 8  | 5 | 0  | 0 | 9  | 8  | 17 | 1.1 | No dramatic change | 17 | 0  | 100.0 | Memb only           | 788 | 15 |
| ≥ 2 unique peptides | rmAC3046 | Q5UY86_HALMA       | <i>aspC2</i>     | Aspartate aminotransferase                                                                                                      | 0  | 0 | 8  | 3 | 0  | 0 | 9  | 5 | 8  | 9  | 17 | 0.9 | No dramatic change | 0  | 17 | 0.0   | Soluble only        | 381 | 0  |
| ≥ 2 unique peptides | rmAC2486 | Q5UZL2_HALMA       | <i>nadE1</i>     | NH(3)-dependent NAD(+) synthetase (EC 6.3.1.5)                                                                                  | 0  | 0 | 8  | 4 | 0  | 0 | 9  | 4 | 8  | 9  | 17 | 0.9 | No dramatic change | 0  | 17 | 0.0   | Soluble only        | 277 | 0  |
| ≥ 2 unique peptides | rmAC2835 | HIS1_HALMARReview  | <i>hisG</i>      | ATP phosphoribosyltransferase (EC 2.4.2.17) (ATP-PRTase) (ATP-PRT)                                                              | 0  | 0 | 7  | 5 | 0  | 0 | 10 | 5 | 7  | 10 | 17 | 0.7 | No dramatic change | 0  | 17 | 0.0   | Soluble only        | 282 | 0  |
| ≥ 2 unique peptides | rmAC0191 | Q5V5E8_HALMA       | <i>adh3</i>      | Zinc-binding dehydrogenase (EC 1.1.1.1) (EC 1.6.5.5)                                                                            | 0  | 0 | 6  | 3 | 1  | 1 | 10 | 4 | 6  | 11 | 17 | 0.5 | No dramatic change | 1  | 16 | 5.9   | Soluble predominant | 355 | 0  |
| ≥ 2 unique peptides | rmAC1081 | Q5V359_HALMA       | <i>rffH1</i>     | Glucose-1-phosphate thymidyltransferase                                                                                         | 0  | 0 | 6  | 3 | 0  | 0 | 11 | 6 | 6  | 11 | 17 | 0.5 | No dramatic change | 0  | 17 | 0.0   | Soluble only        | 393 | 0  |
| ≥ 2 unique peptides | rmAC3100 | Y3100_HALMARReview | <i>rrnAC3100</i> | UPF0447 protein rmAC3100                                                                                                        | 0  | 0 | 3  | 3 | 0  | 0 | 14 | 9 | 3  | 14 | 17 | 0.2 | 1.2 (>3X)          | 0  | 17 | 0.0   | Soluble only        | 669 | 0  |
| ≥ 2 unique peptides | rmAC1598 | RL5_HALMARReview   | <i>rpl5p</i>     | 50S ribosomal protein LSP (Hmal5) (HI13)                                                                                        | 8  | 3 | 5  | 1 | 3  | 1 | 1  | 1 | 13 | 4  | 17 | 3.3 | 0.7 (>3X)          | 11 | 6  | 64.7  | Memb + Sol          | 177 | 0  |
| ≥ 2 unique peptides | rmAC3164 | RF1_HALMARReview   | <i>prf1</i>      | Peptide chain release factor subunit 1 (Translation termination factorRF1)                                                      | 0  | 0 | 11 | 6 | 0  | 0 | 6  | 4 | 11 | 6  | 17 | 1.8 | No dramatic change | 0  | 17 | 0.0   | Soluble only        | 418 | 0  |
| ≥ 2 unique peptides | rmAC1956 | Q5V0X9_HALMA       | <i>ejf2BD2</i>   | Translation initiation factor eIF-2B subunit delta                                                                              | 0  | 0 | 10 | 4 | 0  | 0 | 7  | 5 | 10 | 7  | 17 | 1.4 | No dramatic change | 0  | 17 | 0.0   | Soluble only        | 283 | 0  |
| ≥ 2 unique peptides | rmAC0402 | Q5V4W4_HALMA       | <i>usp15</i>     | Universal stress protein                                                                                                        | 0  | 0 | 8  | 4 | 3  | 2 | 6  | 3 | 8  | 9  | 17 | 0.9 | No dramatic change | 3  | 14 | 17.6  | Soluble predominant | 149 | 0  |
| ≥ 2 unique peptides | rmAC2111 | SECG_HALMARReview  | <i>secG</i>      | Preprotein translocase secG subunit (Protein transport protein SEC61 subunit beta homolog)                                      | 11 | 2 | 0  | 0 | 6  | 1 | 0  | 0 | 11 | 6  | 17 | 1.8 | No dramatic change | 17 | 0  | 100.0 | Memb only           | 53  | 1  |
| ≥ 2 unique peptides | rmAC0722 | Q5V437_HALMA       | <i>mop</i>       | Molybdenum-pterin binding protein                                                                                               | 0  | 0 | 9  | 2 | 0  | 0 | 8  | 2 | 9  | 8  | 17 | 1.1 | No dramatic change | 0  | 17 | 0.0   | Soluble only        | 69  | 0  |
| ≥ 2 unique peptides | pNG5001  | Q5V7G3_HALMA       | <i>abcP-1</i>    | ABC transporter permease protein                                                                                                | 8  | 4 | 0  | 0 | 9  | 3 | 0  | 0 | 8  | 9  | 17 | 0.9 | No dramatic change | 17 | 0  | 100.0 | Memb only           | 367 | 4  |
| ≥ 2 unique peptides | rmAC1760 | Q5V1E4_HALMA       | <i>rrnAC1760</i> | Transporter possibly hexose                                                                                                     | 6  | 1 | 0  | 0 | 11 | 3 | 0  | 0 | 6  | 11 | 17 | 0.5 | No dramatic change | 17 | 0  | 100.0 | Memb only           | 449 | 11 |
| ≥ 2 unique peptides | rmAC0867 | Q5V3Q4_HALMA       | <i>rrnAC0867</i> | Transcription regulator                                                                                                         | 1  | 1 | 6  | 1 | 4  | 2 | 5  | 1 | 7  | 9  | 16 | 0.8 | No dramatic change | 5  | 11 | 31.3  | Memb + Sol          | 187 | 0  |
| ≥ 2 unique peptides | pNG7172  | Q5V6H4_HALMA       | <i>pNG7172</i>   | Hypothetical protein                                                                                                            | 11 | 6 | 0  | 0 | 5  | 4 | 0  | 0 | 11 | 5  | 16 | 2.2 | 0.7 (>3X)          | 16 | 0  | 100.0 | Memb only           | 356 | 0  |
| ≥ 2 unique peptides | rmAC2098 | Q5V0K4_HALMA       | <i>rrnAC2098</i> | Hypothetical protein                                                                                                            | 0  | 0 | 10 | 7 | 0  | 0 | 6  | 6 | 10 | 6  | 16 | 1.7 | No dramatic change | 0  | 16 | 0.0   | Soluble only        | 634 | 0  |
| ≥ 2 unique peptides | rmAC1150 | Q5V301_HALMA       | <i>rrnAC1150</i> | Hypothetical protein                                                                                                            | 8  | 2 | 0  | 0 | 8  | 2 | 0  | 0 | 8  | 8  | 16 | 1.0 | No dramatic change | 16 | 0  | 100.0 | Memb only           | 257 | 6  |
| ≥ 2 unique peptides | rmAC0120 | Q5V5K8_HALMA       | <i>rrnAC0120</i> | Hypothetical protein                                                                                                            | 0  | 0 | 8  | 6 | 0  | 0 | 8  | 6 | 8  | 8  | 16 | 1.0 | No dramatic change | 0  | 16 | 0.0   | Soluble only        | 250 | 0  |
| ≥ 2 unique peptides | rmAC2546 | Q5UZF8_HALMA       | <i>rrnAC2546</i> | Hypothetical protein                                                                                                            | 6  | 2 | 0  | 0 | 10 | 2 | 0  | 0 | 6  | 10 | 16 | 0.6 | No dramatic change | 16 | 0  | 100.0 | Memb only           | 285 | 7  |
| ≥ 2 unique peptides | rmAC0171 | Q5V5G5_HALMA       | <i>rrnAC0171</i> | Hypothetical protein                                                                                                            | 0  | 0 | 4  | 3 | 0  | 0 | 12 | 7 | 4  | 12 | 16 | 0.3 | 1.2 (>3X)          | 0  | 16 | 0.0   | Soluble only        | 359 | 0  |
| ≥ 2 unique peptides | rmB0241  | Q5UWD7_HALMA       | <i>acaA</i>      | Acyl carrier protein synthase (EC 2.3.1.41)                                                                                     | 0  | 0 | 12 | 7 | 0  | 0 | 4  | 2 | 12 | 4  | 16 | 3.0 | 0.7 (>3X)          | 0  | 16 | 0.0   | Soluble only        | 478 | 0  |
| ≥ 2 unique peptides | rmAC1892 | Q5V133_HALMA       | <i>rrnAC1892</i> | DSBA-like thioredoxin domain                                                                                                    | 9  | 5 | 0  | 0 | 7  | 5 | 0  | 0 | 9  | 7  | 16 | 1.3 | No dramatic change | 16 | 0  | 100.0 | Memb only           | 218 | 0  |
| ≥ 2 unique peptides | rmAC1222 | Q5V2T6_HALMA       | <i>moxR4</i>     | Methanol dehydrogenase regulatory protein                                                                                       | 7  | 2 | 2  | 2 | 7  | 4 | 0  | 0 | 9  | 7  | 16 | 1.3 | No dramatic change | 14 | 2  | 87.5  | Memb predominant    | 313 | 0  |
| ≥ 2 unique peptides | rmAC0359 | Q5V4Z7_HALMA       | <i>rrnAC0359</i> | 4-hydroxybenzoate 3-monooxygenase (EC 1.14.13.2)                                                                                | 8  | 5 | 0  | 0 | 8  | 6 | 0  | 0 | 8  | 8  | 16 | 1.0 | No dramatic change | 16 | 0  | 100.0 | Memb only           | 452 | 0  |
| ≥ 2 unique peptides | rmAC1489 | Q5V240_HALMA       | <i>dmd</i>       | Diphosphomevalonate decarboxylase (EC 4.1.1.33)                                                                                 | 1  | 1 | 7  | 4 | 0  | 0 | 8  | 4 | 8  | 8  | 16 | 1.0 | No dramatic change | 1  | 15 | 6.3   | Soluble predominant | 324 | 0  |
| ≥ 2 unique peptides | rmAC3484 | IDI_HALMARReview   | <i>idi</i>       | Isopentenyl-diphosphate Delta-isomerase (EC 5.3.3.2) (IPP isomerase)(Isopentenyl pyrophosphate isomerase) (IPP:DMAPP isomerase) | 0  | 0 | 7  | 4 | 0  | 0 | 9  | 6 | 7  | 9  | 16 | 0.8 | No dramatic change | 0  | 16 | 0.0   | Soluble only        | 187 | 0  |
| ≥ 2 unique peptides | rmAC0268 | Q5V577_HALMA       | <i>yrbE</i>      | Oxidoreductase                                                                                                                  | 0  | 0 | 7  | 4 | 0  | 0 | 9  | 5 | 7  | 9  | 16 | 0.8 | No dramatic change | 0  | 16 | 0.0   | Soluble only        | 381 | 0  |
| ≥ 2 unique peptides | pNG6012  | Q5V7D9_HALMA       | <i>parA2</i>     | Partition protein                                                                                                               | 0  | 0 | 7  | 2 | 0  | 0 | 9  | 4 | 7  | 9  | 16 | 0.8 | No dramatic change | 0  | 16 | 0.0   | Soluble only        | 272 | 0  |
| ≥ 2 unique peptides | rmAC1406 | Q5V2B7_HALMA       | <i>dph5</i>      | Diphthine synthase (EC 2.1.1.98)                                                                                                | 0  | 0 | 6  | 2 | 0  | 0 | 10 | 4 | 6  | 10 | 16 | 0.6 | No dramatic change | 0  | 16 | 0.0   | Soluble only        | 259 | 0  |
| ≥ 2 unique peptides | rmAC1980 | Q5V0V7_HALMA       | <i>aph</i>       | Aminoglycoside phosphotransferase                                                                                               | 0  | 0 | 5  | 3 | 0  | 0 | 11 | 3 | 5  | 11 | 16 | 0.5 | 1.2 (2-3X)         | 0  | 16 | 0.0   | Soluble only        | 356 | 0  |

|                     |          |                   |                  |                                                                                                                                        |    |   |    |   |    |   |    |   |    |    |    |     |                    |    |    |       |                     |     |    |
|---------------------|----------|-------------------|------------------|----------------------------------------------------------------------------------------------------------------------------------------|----|---|----|---|----|---|----|---|----|----|----|-----|--------------------|----|----|-------|---------------------|-----|----|
| ≥ 2 unique peptides | pNG7301  | Q5V655_HALMA      | <i>pphA</i>      | Serine/threonine protein phosphatase (EC 3.1.3.16)                                                                                     | 2  | 2 | 2  | 2 | 4  | 2 | 8  | 2 | 4  | 12 | 16 | 0.3 | 1.2 (>3X)          | 6  | 10 | 37.5  | Memb + Sol          | 236 | 0  |
| ≥ 2 unique peptides | rmAC2712 | Q5U223_HALMA      | <i>sec11a</i>    | Signal sequence peptidase                                                                                                              | 9  | 3 | 0  | 0 | 7  | 2 | 0  | 0 | 9  | 7  | 16 | 1.3 | No dramatic change | 16 | 0  | 100.0 | Memb only           | 279 | 1  |
| ≥ 2 unique peptides | rmAC1591 | RL30_HALMARReview | <i>rpL30p</i>    | 50S ribosomal protein L30P (Hmal30) (H120) (H116)                                                                                      | 0  | 0 | 9  | 4 | 0  | 0 | 7  | 3 | 9  | 7  | 16 | 1.3 | No dramatic change | 0  | 16 | 0.0   | Soluble only        | 154 | 0  |
| ≥ 2 unique peptides | rmAC1114 | Q5V331_HALMA      | <i>htlD</i>      | Sensor protein (EC 2.7.13.3)                                                                                                           | 7  | 4 | 0  | 0 | 9  | 4 | 0  | 0 | 7  | 9  | 16 | 0.8 | No dramatic change | 16 | 0  | 100.0 | Memb only           | 575 | 6  |
| ≥ 2 unique peptides | rmAC1745 | Q5V1F6_HALMA      | <i>yckA-2</i>    | Amino acid ABC transporter permease protein                                                                                            | 11 | 5 | 0  | 0 | 5  | 3 | 0  | 0 | 11 | 5  | 16 | 2.2 | 0.7 (2-3X)         | 16 | 0  | 100.0 | Memb only           | 326 | 5  |
| ≥ 2 unique peptides | rmAC0180 | Q5V5F8_HALMA      | <i>nhaC5</i>     | Na <sup>+</sup> /H <sup>+</sup> antiporter                                                                                             | 8  | 2 | 0  | 0 | 8  | 1 | 0  | 0 | 8  | 8  | 16 | 1.0 | No dramatic change | 16 | 0  | 100.0 | Memb only           | 717 | 13 |
| ≥ 2 unique peptides | rmAC0010 | Q5V5V7_HALMA      | <i>nac</i>       | Sodium-and chloride-dependent transporter                                                                                              | 7  | 3 | 0  | 0 | 9  | 3 | 0  | 0 | 7  | 9  | 16 | 0.8 | No dramatic change | 16 | 0  | 100.0 | Memb only           | 445 | 11 |
| ≥ 2 unique peptides | rmAC2740 | Q5UYZ9_HALMA      | <i>rrmAC2740</i> | TRAM domain protein                                                                                                                    | 0  | 0 | 6  | 2 | 0  | 0 | 10 | 3 | 6  | 10 | 16 | 0.6 | No dramatic change | 0  | 16 | 0.0   | Soluble only        | 150 | 0  |
| ≥ 2 unique peptides | rmAC0435 | Q5V4T3_HALMA      | <i>rrmAC0435</i> | Transcription regulator                                                                                                                | 0  | 0 | 11 | 3 | 0  | 0 | 4  | 1 | 11 | 4  | 15 | 2.8 | 0.7 (2-3X)         | 0  | 15 | 0.0   | Soluble only        | 91  | 0  |
| ≥ 2 unique peptides | rmAC3315 | Q5UXJ8_HALMA      | <i>rrmAC3315</i> | Hypothetical protein                                                                                                                   | 10 | 3 | 0  | 0 | 5  | 3 | 0  | 0 | 10 | 5  | 15 | 2.0 | 0.7 (2-3X)         | 15 | 0  | 100.0 | Memb only           | 285 | 0  |
| ≥ 2 unique peptides | pNG7152  | Q5V6J2_HALMA      | <i>pNG7152</i>   | Hypothetical protein                                                                                                                   | 10 | 3 | 0  | 0 | 5  | 1 | 0  | 0 | 10 | 5  | 15 | 2.0 | 0.7 (2-3X)         | 15 | 0  | 100.0 | Memb only           | 103 | 1  |
| ≥ 2 unique peptides | rmAC1704 | Q5V1J2_HALMA      | <i>rrmAC1704</i> | Hypothetical protein                                                                                                                   | 8  | 6 | 0  | 0 | 7  | 4 | 0  | 0 | 8  | 7  | 15 | 1.1 | No dramatic change | 15 | 0  | 100.0 | Memb only           | 258 | 2  |
| ≥ 2 unique peptides | pNG2015  | Q5V844_HALMA      | <i>pNG2015</i>   | Hypothetical protein                                                                                                                   | 8  | 3 | 0  | 0 | 7  | 3 | 0  | 0 | 8  | 7  | 15 | 1.1 | No dramatic change | 15 | 0  | 100.0 | Memb only           | 204 | 1  |
| ≥ 2 unique peptides | rmAC0862 | Q5V3Q9_HALMA      | <i>rrmAC0862</i> | Hypothetical protein                                                                                                                   | 0  | 0 | 8  | 3 | 0  | 0 | 7  | 2 | 8  | 7  | 15 | 1.1 | No dramatic change | 0  | 15 | 0.0   | Soluble only        | 224 | 0  |
| ≥ 2 unique peptides | rmAC2125 | Q5V0I0_HALMA      | <i>rrmAC2125</i> | Hypothetical protein                                                                                                                   | 7  | 2 | 0  | 0 | 8  | 3 | 0  | 0 | 7  | 8  | 15 | 0.9 | No dramatic change | 15 | 0  | 100.0 | Memb only           | 159 | 3  |
| ≥ 2 unique peptides | rmAC0655 | Q5V493_HALMA      | <i>rrmAC0655</i> | Hypothetical protein                                                                                                                   | 0  | 0 | 7  | 2 | 0  | 0 | 8  | 3 | 7  | 8  | 15 | 0.9 | No dramatic change | 0  | 15 | 0.0   | Soluble only        | 218 | 0  |
| ≥ 2 unique peptides | rmAC2757 | Q5UYU3_HALMA      | <i>rrmAC2757</i> | Hypothetical protein                                                                                                                   | 2  | 1 | 4  | 3 | 3  | 2 | 6  | 5 | 6  | 9  | 15 | 0.7 | No dramatic change | 5  | 10 | 33.3  | Memb + Sol          | 729 | 0  |
| ≥ 2 unique peptides | rmAC1089 | Q5V351_HALMA      | <i>rrmAC1089</i> | Hypothetical protein                                                                                                                   | 0  | 0 | 6  | 5 | 0  | 0 | 9  | 6 | 6  | 9  | 15 | 0.7 | No dramatic change | 0  | 15 | 0.0   | Soluble only        | 450 | 0  |
| ≥ 2 unique peptides | pNG2008  | Q5V850_HALMA      | <i>pNG2008</i>   | Hypothetical protein                                                                                                                   | 0  | 0 | 6  | 3 | 0  | 0 | 9  | 3 | 6  | 9  | 15 | 0.7 | No dramatic change | 0  | 15 | 0.0   | Soluble only        | 244 | 0  |
| ≥ 2 unique peptides | rmAC0895 | Q5V3M9_HALMA      | <i>rrmAC0895</i> | Hypothetical protein                                                                                                                   | 0  | 0 | 4  | 2 | 0  | 0 | 11 | 5 | 4  | 11 | 15 | 0.4 | 1.2 (2-3X)         | 0  | 15 | 0.0   | Soluble only        | 126 | 0  |
| ≥ 2 unique peptides | rmAC3363 | Q5UXF1_HALMA      | <i>carA</i>      | Carbamoyl-phosphate synthase small chain (EC 6.3.5.5)                                                                                  | 0  | 0 | 10 | 4 | 0  | 0 | 5  | 3 | 10 | 5  | 15 | 2.0 | 0.7 (2-3X)         | 0  | 15 | 0.0   | Soluble only        | 348 | 0  |
| ≥ 2 unique peptides | rmAC2927 | Q5UYI9_HALMA      | <i>yafB-4</i>    | Oxidoreductase                                                                                                                         | 0  | 0 | 8  | 3 | 0  | 0 | 7  | 5 | 8  | 7  | 15 | 1.1 | No dramatic change | 0  | 15 | 0.0   | Soluble only        | 264 | 0  |
| ≥ 2 unique peptides | rmAC1955 | Q5V0Y0_HALMA      | <i>glpA</i>      | Glycerol-3-phosphate dehydrogenase subunit A (EC 1.1.99.5)                                                                             | 0  | 0 | 6  | 3 | 0  | 0 | 9  | 5 | 6  | 9  | 15 | 0.7 | No dramatic change | 0  | 15 | 0.0   | Soluble only        | 406 | 0  |
| ≥ 2 unique peptides | rmAC1390 | PURL_HALMARReview | <i>purL</i>      | Phosphoribosylformylglycinamide synthase II (EC 6.3.5.3) (FGAMsynthase II)                                                             | 0  | 0 | 5  | 3 | 0  | 0 | 10 | 8 | 5  | 10 | 15 | 0.5 | 1.2 (2-3X)         | 0  | 15 | 0.0   | Soluble only        | 720 | 0  |
| ≥ 2 unique peptides | rmAC1977 | Q5V0W0_HALMA      | <i>alkK4</i>     | Medium-chain fatty acid-CoA ligase                                                                                                     | 0  | 0 | 5  | 5 | 0  | 0 | 10 | 5 | 5  | 10 | 15 | 0.5 | 1.2 (2-3X)         | 0  | 15 | 0.0   | Soluble only        | 551 | 0  |
| ≥ 2 unique peptides | rmAC3505 | Q5UX29_HALMA      | <i>thrC1</i>     | Threonine synthase (EC 4.2.3.1)                                                                                                        | 0  | 0 | 5  | 4 | 0  | 0 | 10 | 5 | 5  | 10 | 15 | 0.5 | 1.2 (2-3X)         | 0  | 15 | 0.0   | Soluble only        | 390 | 0  |
| ≥ 2 unique peptides | rmAC1711 | Q5V1I6_HALMA      | <i>nirH</i>      | Heme biosynthesis protein NirH                                                                                                         | 0  | 0 | 5  | 2 | 0  | 0 | 10 | 3 | 5  | 10 | 15 | 0.5 | 1.2 (2-3X)         | 0  | 15 | 0.0   | Soluble only        | 351 | 0  |
| ≥ 2 unique peptides | rmAC2800 | Q5UYU7_HALMA      | <i>fprA</i>      | Flavoprotein                                                                                                                           | 0  | 0 | 3  | 3 | 1  | 1 | 11 | 3 | 3  | 12 | 15 | 0.3 | 1.2 (>3X)          | 1  | 14 | 6.7   | Soluble predominant | 232 | 0  |
| ≥ 2 unique peptides | rmAC2220 | Q5V0A0_HALMA      | <i>usp5</i>      | Universal stress protein                                                                                                               | 0  | 0 | 9  | 4 | 0  | 0 | 6  | 2 | 9  | 6  | 15 | 1.5 | No dramatic change | 0  | 15 | 0.0   | Soluble only        | 154 | 0  |
| ≥ 2 unique peptides | pNG7139  | Q5V6K3_HALMA      | <i>usp13</i>     | Universal stress protein                                                                                                               | 0  | 0 | 8  | 5 | 1  | 1 | 6  | 3 | 8  | 7  | 15 | 1.1 | No dramatic change | 1  | 14 | 6.7   | Soluble predominant | 300 | 0  |
| ≥ 2 unique peptides | rmAC3225 | Q5UXS6_HALMA      | <i>usp22</i>     | Universal stress protein                                                                                                               | 3  | 3 | 0  | 0 | 10 | 5 | 2  | 1 | 3  | 12 | 15 | 0.3 | 1.2 (>3X)          | 13 | 2  | 86.7  | Memb predominant    | 157 | 0  |
| ≥ 2 unique peptides | rmAC0827 | Q5V3U2_HALMA      | <i>livG-4</i>    | Branched-chain amino acid ABC transporter ATP-binding protein                                                                          | 11 | 4 | 0  | 0 | 4  | 3 | 0  | 0 | 11 | 4  | 15 | 2.8 | 0.7 (2-3X)         | 15 | 0  | 100.0 | Memb only           | 276 | 0  |
| ≥ 2 unique peptides | rmAC0825 | Q5V3U3_HALMA      | <i>livM</i>      | High-affinity branched-chain amino acid transport protein                                                                              | 9  | 3 | 0  | 0 | 6  | 2 | 0  | 0 | 9  | 6  | 15 | 1.5 | No dramatic change | 15 | 0  | 100.0 | Memb only           | 460 | 8  |
| ≥ 2 unique peptides | rmAC2004 | Q5V0T7_HALMA      | <i>ftsZ3</i>     | Cell division protein FtsZ                                                                                                             | 3  | 2 | 6  | 3 | 1  | 1 | 4  | 4 | 9  | 5  | 14 | 1.8 | No dramatic change | 4  | 10 | 28.6  | Memb + Sol          | 412 | 0  |
| ≥ 2 unique peptides | rmAC2723 | Q5UZ13_HALMA      | <i>rrmAC2723</i> | Putative bacterial regulatory protein arsR family                                                                                      | 8  | 4 | 0  | 0 | 6  | 4 | 0  | 0 | 8  | 6  | 14 | 1.3 | No dramatic change | 14 | 0  | 100.0 | Memb only           | 229 | 2  |
| ≥ 2 unique peptides | rmAC1916 | Q5V114_HALMA      | <i>rrmAC1916</i> | 6-O-methylguanine DNA methyltransferase DNA binding domain                                                                             | 0  | 0 | 6  | 3 | 0  | 0 | 8  | 3 | 6  | 8  | 14 | 0.8 | No dramatic change | 0  | 14 | 0.0   | Soluble only        | 167 | 0  |
| ≥ 2 unique peptides | rmAC2202 | Q5V0B5_HALMA      | <i>kaiC1</i>     | Circadian regulator                                                                                                                    | 0  | 0 | 6  | 1 | 0  | 0 | 8  | 3 | 6  | 8  | 14 | 0.8 | No dramatic change | 0  | 14 | 0.0   | Soluble only        | 241 | 0  |
| ≥ 2 unique peptides | rmAC2801 | Q5UYU6_HALMA      | <i>rrmAC2801</i> | Hypothetical protein                                                                                                                   | 8  | 4 | 0  | 0 | 6  | 3 | 0  | 0 | 8  | 6  | 14 | 1.3 | No dramatic change | 14 | 0  | 100.0 | Memb only           | 301 | 4  |
| ≥ 2 unique peptides | rmAC1022 | Q5V3B5_HALMA      | <i>rrmAC1022</i> | Hypothetical protein                                                                                                                   | 8  | 4 | 0  | 0 | 6  | 3 | 0  | 0 | 8  | 6  | 14 | 1.3 | No dramatic change | 14 | 0  | 100.0 | Memb only           | 481 | 1  |
| ≥ 2 unique peptides | rmAC0228 | Q5V5B5_HALMA      | <i>rrmAC0228</i> | Hypothetical protein                                                                                                                   | 7  | 4 | 0  | 0 | 7  | 2 | 0  | 0 | 7  | 7  | 14 | 1.0 | No dramatic change | 14 | 0  | 100.0 | Memb only           | 90  | 0  |
| ≥ 2 unique peptides | pNG5010  | Q5V7H0_HALMA      | <i>pNG5010</i>   | Hypothetical protein                                                                                                                   | 7  | 2 | 0  | 0 | 7  | 2 | 0  | 0 | 7  | 7  | 14 | 1.0 | No dramatic change | 14 | 0  | 100.0 | Memb only           | 292 | 1  |
| ≥ 2 unique peptides | rmAC1304 | Q5V2L2_HALMA      | <i>rrmAC1304</i> | Hypothetical protein                                                                                                                   | 0  | 0 | 6  | 3 | 0  | 0 | 8  | 4 | 6  | 8  | 14 | 0.8 | No dramatic change | 0  | 14 | 0.0   | Soluble only        | 136 | 0  |
| ≥ 2 unique peptides | rmAC2221 | Q5V099_HALMA      | <i>rrmAC2221</i> | Hypothetical protein                                                                                                                   | 0  | 0 | 3  | 2 | 0  | 0 | 11 | 5 | 3  | 11 | 14 | 0.3 | 1.2 (>3X)          | 0  | 14 | 0.0   | Soluble only        | 192 | 0  |
| ≥ 2 unique peptides | rmAC1019 | Q5V3B8_HALMA      | <i>dpm1</i>      | Dolichyl-phosphate beta-D-mannosyltransferase                                                                                          | 12 | 6 | 0  | 0 | 2  | 1 | 0  | 0 | 12 | 2  | 14 | 6.0 | 0.7 (>3X)          | 14 | 0  | 100.0 | Memb only           | 324 | 2  |
| ≥ 2 unique peptides | rmAC1261 | Q5V2P9_HALMA      | <i>acdD</i>      | Acyl-coA dehydrogenase (EC 1.3.99.-)                                                                                                   | 0  | 0 | 11 | 4 | 0  | 0 | 3  | 2 | 11 | 3  | 14 | 3.7 | 0.7 (>3X)          | 0  | 14 | 0.0   | Soluble only        | 393 | 0  |
| ≥ 2 unique peptides | rmAC0429 | Q5V4T9_HALMA      | <i>lpg3</i>      | LPS glycosyltransferase                                                                                                                | 10 | 4 | 0  | 0 | 4  | 1 | 0  | 0 | 10 | 4  | 14 | 2.5 | 0.7 (2-3X)         | 14 | 0  | 100.0 | Memb only           | 397 | 0  |
| ≥ 2 unique peptides | rmAC2678 | ARGC_HALMARReview | <i>argC</i>      | N-acetyl-gamma-glutamyl-phosphate reductase (EC 1.2.1.38) (AGPR) (N-acetyl-glutamate semialdehyde dehydrogenase) (NAGSA dehydrogenase) | 0  | 0 | 10 | 4 | 0  | 0 | 4  | 3 | 10 | 4  | 14 | 2.5 | 0.7 (2-3X)         | 0  | 14 | 0.0   | Soluble only        | 345 | 0  |
| ≥ 2 unique peptides | rmAC1818 | Q5V196_HALMA      | <i>rrmAC1818</i> | Putative hydrolase                                                                                                                     | 8  | 4 | 0  | 0 | 6  | 4 | 0  | 0 | 8  | 6  | 14 | 1.3 | No dramatic change | 14 | 0  | 100.0 | Memb only           | 623 | 0  |
| ≥ 2 unique peptides | rmAC3304 | Q5UXK7_HALMA      | <i>yfhM</i>      | Epoxide hydrolase-related protein                                                                                                      | 8  | 3 | 0  | 0 | 6  | 2 | 0  | 0 | 8  | 6  | 14 | 1.3 | No dramatic change | 14 | 0  | 100.0 | Memb only           | 313 | 0  |
| ≥ 2 unique peptides | pNG6023  | Q5V6Z0_HALMA      | <i>pNG6023</i>   | Putative metal ion permease                                                                                                            | 8  | 2 | 0  | 0 | 6  | 2 | 0  | 0 | 8  | 6  | 14 | 1.3 | No dramatic change | 14 | 0  | 100.0 | Memb only           | 464 | 8  |
| ≥ 2 unique peptides | rmAC0332 | ILVC_HALMARReview | <i>ilvC</i>      | Keto-acid reductoisomerase (EC 1.1.1.86) (Acetohydroxy-acidisomeroeductase) (Alpha-keto-beta-hydroxylacil reductoisomerase)            | 0  | 0 | 8  | 5 | 0  | 0 | 6  | 4 | 8  | 6  | 14 | 1.3 | No dramatic change | 0  | 14 | 0.0   | Soluble only        | 343 | 0  |
| ≥ 2 unique peptides | rmAC0868 | Q5V3Q3_HALMA      | <i>coaD2</i>     | Phosphopantetheine adenyltransferase (EC 2.7.7.3)                                                                                      | 0  | 0 | 8  | 4 | 0  | 0 | 6  | 3 | 8  | 6  | 14 | 1.3 | No dramatic change | 0  | 14 | 0.0   | Soluble only        | 162 | 0  |
| ≥ 2 unique peptides | rmAC3086 | Q5UY52_HALMA      | <i>hemC</i>      | Porphobilinogen deaminase (EC 2.5.1.61)                                                                                                | 0  | 0 | 7  | 5 | 0  | 0 | 7  | 3 | 7  | 7  | 14 | 1.0 | No dramatic change | 0  | 14 | 0.0   | Soluble only        | 389 | 0  |
| ≥ 2 unique peptides | pNG6081  | Q5V741_HALMA      | <i>zntA1</i>     | Zinc-transporting ATPase                                                                                                               | 6  | 6 | 0  | 0 | 8  | 7 | 0  | 0 | 6  | 8  | 14 | 0.8 | No dramatic change | 14 | 0  | 100.0 | Memb only           | 894 | 6  |

|                     |          |                   |                 |                                                                                                           |    |   |    |   |   |   |    |   |    |    |    |     |                    |    |    |       |                     |     |    |
|---------------------|----------|-------------------|-----------------|-----------------------------------------------------------------------------------------------------------|----|---|----|---|---|---|----|---|----|----|----|-----|--------------------|----|----|-------|---------------------|-----|----|
| ≥ 2 unique peptides | pNG7164  | Q5V612_HALMA      | <i>hyuA</i>     | N-methylhydantoinase A (EC 3.5.2.9)                                                                       | 0  | 0 | 6  | 4 | 0 | 0 | 8  | 6 | 6  | 8  | 14 | 0.8 | No dramatic change | 0  | 14 | 0.0   | Soluble only        | 664 | 0  |
| ≥ 2 unique peptides | rmAC0511 | Q5V4M0_HALMA      | <i>hpcEa</i>    | 2-hydroxyhepta-24-diene-1,7-dioate isomerase                                                              | 0  | 0 | 5  | 2 | 0 | 0 | 9  | 2 | 5  | 9  | 14 | 0.6 | No dramatic change | 0  | 14 | 0.0   | Soluble only        | 257 | 0  |
| ≥ 2 unique peptides | rmAC0970 | Q5V3G2_HALMA      | <i>aor3</i>     | Flavin-containing amine-oxidoreductase                                                                    | 0  | 0 | 3  | 3 | 1 | 1 | 10 | 9 | 3  | 11 | 14 | 0.3 | 1.2 (>3X)          | 1  | 13 | 7.1   | Soluble predominant | 344 | 0  |
| ≥ 2 unique peptides | rmAC1957 | Q5V0X8_HALMA      | <i>malQ</i>     | 4-alpha-glucanotransferase (EC 2.4.1.25)                                                                  | 0  | 0 | 2  | 1 | 0 | 0 | 12 | 7 | 2  | 12 | 14 | 0.2 | 1.2 (>3X)          | 0  | 14 | 0.0   | Soluble only        | 556 | 0  |
| ≥ 2 unique peptides | rmAC1772 | Q5V1D5_HALMA      | <i>psmA1</i>    | Proteasome subunit alpha                                                                                  | 0  | 0 | 5  | 4 | 0 | 0 | 9  | 6 | 5  | 9  | 14 | 0.6 | No dramatic change | 0  | 14 | 0.0   | Soluble only        | 230 | 0  |
| ≥ 2 unique peptides | rmAC1607 | RS19_HALMARReview | <i>rps19p</i>   | 30S ribosomal protein S19P (HmaS19) (HS18)                                                                | 1  | 1 | 11 | 4 | 2 | 1 | 0  | 0 | 12 | 2  | 14 | 6.0 | 0.7 (>3X)          | 3  | 11 | 21.4  | Soluble predominant | 140 | 0  |
| ≥ 2 unique peptides | rmAC1597 | RS8_HALMARReview  | <i>rps8p</i>    | 30S ribosomal protein S8P (HmaS8) (HS16)                                                                  | 1  | 1 | 6  | 3 | 2 | 2 | 5  | 3 | 7  | 7  | 14 | 1.0 | No dramatic change | 3  | 11 | 21.4  | Soluble predominant | 130 | 0  |
| ≥ 2 unique peptides | rmAC2000 | Q5V0U0_HALMA      | <i>usp9</i>     | Universal stress protein family                                                                           | 0  | 0 | 3  | 2 | 0 | 0 | 11 | 4 | 3  | 11 | 14 | 0.3 | 1.2 (>3X)          | 0  | 14 | 0.0   | Soluble only        | 272 | 0  |
| ≥ 2 unique peptides | rmB0322  | Q5UW67_HALMA      | <i>phnD2</i>    | Phosphonates ABC transporter permease protein                                                             | 12 | 6 | 0  | 0 | 2 | 1 | 0  | 0 | 12 | 2  | 14 | 6.0 | 0.7 (>3X)          | 14 | 0  | 100.0 | Memb only           | 264 | 5  |
| ≥ 2 unique peptides | rmAC0819 | Q5V3U8_HALMA      | <i>rmAC0819</i> | 2-domain regulatory protein                                                                               | 0  | 0 | 7  | 3 | 0 | 0 | 6  | 5 | 7  | 6  | 13 | 1.2 | No dramatic change | 0  | 13 | 0.0   | Soluble only        | 344 | 0  |
| ≥ 2 unique peptides | rmAC0936 | Q5V3J3_HALMA      | <i>rmAC0936</i> | Hypothetical protein                                                                                      | 10 | 4 | 0  | 0 | 3 | 2 | 0  | 0 | 10 | 3  | 13 | 3.3 | 0.7 (>3X)          | 13 | 0  | 100.0 | Memb only           | 128 | 3  |
| ≥ 2 unique peptides | rmAC0591 | Q5V4F0_HALMA      | <i>rmAC0591</i> | Hypothetical protein                                                                                      | 0  | 0 | 10 | 4 | 0 | 0 | 3  | 2 | 10 | 3  | 13 | 3.3 | 0.7 (>3X)          | 0  | 13 | 0.0   | Soluble only        | 279 | 0  |
| ≥ 2 unique peptides | rmAC0752 | Q5V409_HALMA      | <i>rmAC0752</i> | Hypothetical protein                                                                                      | 0  | 0 | 10 | 4 | 0 | 0 | 3  | 1 | 10 | 3  | 13 | 3.3 | 0.7 (>3X)          | 0  | 13 | 0.0   | Soluble only        | 97  | 0  |
| ≥ 2 unique peptides | rmAC0219 | Q5V5C4_HALMA      | <i>rmAC0219</i> | Hypothetical protein                                                                                      | 9  | 3 | 0  | 0 | 4 | 3 | 0  | 0 | 9  | 4  | 13 | 2.3 | 0.7 (2->3X)        | 13 | 0  | 100.0 | Memb only           | 364 | 4  |
| ≥ 2 unique peptides | rmAC0285 | Q5V561_HALMA      | <i>rmAC0285</i> | Hypothetical protein                                                                                      | 8  | 4 | 0  | 0 | 5 | 3 | 0  | 0 | 8  | 5  | 13 | 1.6 | No dramatic change | 13 | 0  | 100.0 | Memb only           | 353 | 3  |
| ≥ 2 unique peptides | rmB0186  | Q5UW12_HALMA      | <i>rmB0186</i>  | Hypothetical protein                                                                                      | 0  | 0 | 8  | 3 | 0 | 0 | 5  | 3 | 8  | 5  | 13 | 1.6 | No dramatic change | 0  | 13 | 0.0   | Soluble only        | 291 | 0  |
| ≥ 2 unique peptides | rmAC1822 | Q5V193_HALMA      | <i>rmAC1822</i> | Hypothetical protein                                                                                      | 0  | 0 | 8  | 2 | 0 | 0 | 5  | 2 | 8  | 5  | 13 | 1.6 | No dramatic change | 0  | 13 | 0.0   | Soluble only        | 221 | 0  |
| ≥ 2 unique peptides | rmAC2981 | Q5UYE1_HALMA      | <i>rmAC2981</i> | Hypothetical protein                                                                                      | 7  | 3 | 0  | 0 | 6 | 3 | 0  | 0 | 7  | 6  | 13 | 1.2 | No dramatic change | 13 | 0  | 100.0 | Memb only           | 408 | 1  |
| ≥ 2 unique peptides | rmAC2752 | Q5UY8_HALMA       | <i>rmAC2752</i> | Hypothetical protein                                                                                      | 0  | 0 | 7  | 4 | 0 | 0 | 6  | 3 | 7  | 6  | 13 | 1.2 | No dramatic change | 0  | 13 | 0.0   | Soluble only        | 92  | 0  |
| ≥ 2 unique peptides | rmAC2444 | Q5UZQ0_HALMA      | <i>rmAC2444</i> | Hypothetical protein                                                                                      | 6  | 5 | 0  | 0 | 7 | 4 | 0  | 0 | 6  | 7  | 13 | 0.9 | No dramatic change | 13 | 0  | 100.0 | Memb only           | 744 | 5  |
| ≥ 2 unique peptides | rmAC2434 | Q5UZQ9_HALMA      | <i>rmAC2434</i> | Hypothetical protein                                                                                      | 0  | 0 | 6  | 1 | 1 | 1 | 6  | 2 | 6  | 7  | 13 | 0.9 | No dramatic change | 1  | 12 | 7.7   | Soluble predominant | 100 | 0  |
| ≥ 2 unique peptides | rmAC0216 | Q5V5C7_HALMA      | <i>rmAC0216</i> | Hypothetical protein                                                                                      | 2  | 2 | 3  | 3 | 5 | 3 | 3  | 2 | 5  | 8  | 13 | 0.6 | No dramatic change | 7  | 6  | 53.8  | Memb + Sol          | 73  | 0  |
| ≥ 2 unique peptides | rmAC2817 | Q5UYT0_HALMA      | <i>rmAC2817</i> | Hypothetical protein                                                                                      | 4  | 1 | 0  | 0 | 2 | 2 | 7  | 2 | 4  | 9  | 13 | 0.4 | 1.2 (2->3X)        | 6  | 7  | 46.2  | Memb + Sol          | 535 | 4  |
| ≥ 2 unique peptides | rmAC2410 | Q5UZT0_HALMA      | <i>rmAC2410</i> | Hypothetical protein                                                                                      | 0  | 0 | 4  | 4 | 0 | 0 | 9  | 6 | 4  | 9  | 13 | 0.4 | 1.2 (2->3X)        | 0  | 13 | 0.0   | Soluble only        | 177 | 0  |
| ≥ 2 unique peptides | rmAC0494 | Q5V4N5_HALMA      | <i>rmAC0494</i> | Hypothetical protein                                                                                      | 0  | 0 | 4  | 2 | 0 | 0 | 9  | 2 | 4  | 9  | 13 | 0.4 | 1.2 (2->3X)        | 0  | 13 | 0.0   | Soluble only        | 101 | 0  |
| ≥ 2 unique peptides | rmB0217  | Q5UWF6_HALMA      | <i>acs2</i>     | Acyl-coenzyme A synthetases (EC 6.2.1.1)                                                                  | 0  | 0 | 11 | 6 | 0 | 0 | 2  | 2 | 11 | 2  | 13 | 5.5 | 0.7 (>3X)          | 0  | 13 | 0.0   | Soluble only        | 666 | 0  |
| ≥ 2 unique peptides | rmAC2069 | Q5V0N0_HALMA      | <i>crtB</i>     | Phytoene synthase (EC 2.5.1.32) (EC 2.5.1.21)                                                             | 8  | 5 | 0  | 0 | 5 | 4 | 0  | 0 | 8  | 5  | 13 | 1.6 | No dramatic change | 13 | 0  | 100.0 | Memb only           | 323 | 0  |
| ≥ 2 unique peptides | rmAC0545 | Q5V4I9_HALMA      | <i>pfk1</i>     | Phosphofructokinase (EC 2.7.1.11)                                                                         | 0  | 0 | 8  | 5 | 0 | 0 | 5  | 4 | 8  | 5  | 13 | 1.6 | No dramatic change | 0  | 13 | 0.0   | Soluble only        | 319 | 0  |
| ≥ 2 unique peptides | rmB0113  | Q5UWN9_HALMA      | <i>gatA2</i>    | Glutamyl-tRNA (Gln) amidotransferase subunit A (EC 6.3.5.-)                                               | 0  | 0 | 8  | 3 | 0 | 0 | 5  | 2 | 8  | 5  | 13 | 1.6 | No dramatic change | 0  | 13 | 0.0   | Soluble only        | 519 | 0  |
| ≥ 2 unique peptides | rmAC2966 | Q5UYF4_HALMA      | <i>pheS</i>     | Phenylalanyl-tRNA synthetase alpha chain (EC 6.1.1.20)                                                    | 0  | 0 | 7  | 5 | 0 | 0 | 6  | 3 | 7  | 6  | 13 | 1.2 | No dramatic change | 0  | 13 | 0.0   | Soluble only        | 503 | 0  |
| ≥ 2 unique peptides | rmAC0098 | Q5V5M8_HALMA      | <i>alkK1</i>    | Medium-chain acyl-CoA ligase                                                                              | 0  | 0 | 6  | 4 | 0 | 0 | 7  | 6 | 6  | 7  | 13 | 0.9 | No dramatic change | 0  | 13 | 0.0   | Soluble only        | 533 | 0  |
| ≥ 2 unique peptides | rmAC0529 | HIS8_HALMARReview | <i>hisC</i>     | Histidinol-phosphate aminotransferase (EC 2.6.1.9) (Imidazole acetol-phosphate transaminase)              | 0  | 0 | 6  | 3 | 0 | 0 | 7  | 5 | 6  | 7  | 13 | 0.9 | No dramatic change | 0  | 13 | 0.0   | Soluble only        | 360 | 0  |
| ≥ 2 unique peptides | rmAC0452 | Q5V4R9_HALMA      | <i>galE</i>     | UDP-glucose 4-epimerase (EC 5.1.3.2)                                                                      | 0  | 0 | 6  | 2 | 0 | 0 | 7  | 4 | 6  | 7  | 13 | 0.9 | No dramatic change | 0  | 13 | 0.0   | Soluble only        | 305 | 0  |
| ≥ 2 unique peptides | rmAC0038 | Q5V5T2_HALMA      | <i>ocd1</i>     | Ornithine cyclodeaminase (EC 4.3.1.12)                                                                    | 0  | 0 | 5  | 3 | 0 | 0 | 8  | 5 | 5  | 8  | 13 | 0.6 | No dramatic change | 0  | 13 | 0.0   | Soluble only        | 335 | 0  |
| ≥ 2 unique peptides | rmAC3429 | DEOC_HALMARReview | <i>deoC</i>     | Probable deoxyribose-phosphate aldolase (EC 4.1.2.4)(Phosphodeoxyriboaldolase) (Deoxyriboaldolase) (DERA) | 0  | 0 | 5  | 4 | 0 | 0 | 8  | 4 | 5  | 8  | 13 | 0.6 | No dramatic change | 0  | 13 | 0.0   | Soluble only        | 231 | 0  |
| ≥ 2 unique peptides | rmAC0717 | Q5V442_HALMA      | <i>rmAC0717</i> | FAD/NAD binding oxidoreductase (EC 1.18.1.3)                                                              | 0  | 0 | 5  | 4 | 0 | 0 | 8  | 4 | 5  | 8  | 13 | 0.6 | No dramatic change | 0  | 13 | 0.0   | Soluble only        | 232 | 0  |
| ≥ 2 unique peptides | rmAC1402 | Q5V2C1_HALMA      | <i>adh4</i>     | Alcohol dehydrogenase (EC 1.1.1.1)                                                                        | 0  | 0 | 5  | 2 | 0 | 0 | 8  | 4 | 5  | 8  | 13 | 0.6 | No dramatic change | 0  | 13 | 0.0   | Soluble only        | 347 | 0  |
| ≥ 2 unique peptides | rmAC0934 | Q5V3J5_HALMA      | <i>mcmA3</i>    | Putative methylmalonyl-CoA mutase                                                                         | 0  | 0 | 5  | 3 | 0 | 0 | 8  | 3 | 5  | 8  | 13 | 0.6 | No dramatic change | 0  | 13 | 0.0   | Soluble only        | 156 | 0  |
| ≥ 2 unique peptides | rmAC1595 | RL32_HALMARReview | <i>rpl32e</i>   | 50S ribosomal protein L32e (HIS)                                                                          | 2  | 1 | 6  | 3 | 4 | 3 | 1  | 1 | 8  | 5  | 13 | 1.6 | No dramatic change | 6  | 7  | 46.2  | Memb + Sol          | 241 | 0  |
| ≥ 2 unique peptides | rmAC0155 | Q5V5H8_HALMA      | <i>epf2b</i>    | MRNA 3'-end processing factor-like                                                                        | 0  | 0 | 5  | 2 | 0 | 0 | 8  | 4 | 5  | 8  | 13 | 0.6 | No dramatic change | 0  | 13 | 0.0   | Soluble only        | 638 | 0  |
| ≥ 2 unique peptides | rmAC0214 | NAC_HALMARReview  | <i>nac</i>      | Nascent polypeptide-associated complex protein                                                            | 0  | 0 | 4  | 2 | 0 | 0 | 9  | 3 | 4  | 9  | 13 | 0.4 | 1.2 (2->3X)        | 0  | 13 | 0.0   | Soluble only        | 130 | 0  |
| ≥ 2 unique peptides | rmAC3203 | IF2P_HALMARReview | <i>infB</i>     | Probable translation initiation factor IF-2                                                               | 0  | 0 | 3  | 2 | 0 | 0 | 10 | 5 | 3  | 10 | 13 | 0.3 | 1.2 (>3X)          | 0  | 13 | 0.0   | Soluble only        | 601 | 0  |
| ≥ 2 unique peptides | rmAC0738 | Q5V421_HALMA      | <i>usp29</i>    | Universal stress protein                                                                                  | 0  | 0 | 5  | 2 | 4 | 2 | 4  | 3 | 5  | 8  | 13 | 0.6 | No dramatic change | 4  | 9  | 30.8  | Memb + Sol          | 168 | 0  |
| ≥ 2 unique peptides | rmAC3171 | Q5UXX6_HALMA      | <i>usp19</i>    | Universal stress protein                                                                                  | 0  | 0 | 2  | 2 | 2 | 1 | 9  | 5 | 2  | 11 | 13 | 0.2 | 1.2 (>3X)          | 2  | 11 | 15.4  | Soluble predominant | 298 | 0  |
| ≥ 2 unique peptides | pNG7161  | Q5V6I3_HALMA      | <i>mntH</i>     | Putative Mn transporter                                                                                   | 7  | 2 | 0  | 0 | 6 | 2 | 0  | 0 | 7  | 6  | 13 | 1.2 | No dramatic change | 13 | 0  | 100.0 | Memb only           | 402 | 11 |
| ≥ 2 unique peptides | rmAC0187 | Q5V5F2_HALMA      | <i>rmAC0187</i> | Putative transporter                                                                                      | 6  | 5 | 0  | 0 | 7 | 6 | 0  | 0 | 6  | 7  | 13 | 0.9 | No dramatic change | 13 | 0  | 100.0 | Memb only           | 328 | 6  |
| ≥ 2 unique peptides | rmAC0706 | Q5V451_HALMA      | <i>nce1</i>     | Na <sup>+</sup> /Ca <sup>2+</sup> -exchanging protein                                                     | 6  | 4 | 0  | 0 | 7 | 4 | 0  | 0 | 6  | 7  | 13 | 0.9 | No dramatic change | 13 | 0  | 100.0 | Memb only           | 489 | 12 |
| ≥ 2 unique peptides | rmAC1070 | Q5V370_HALMA      | <i>spoVR</i>    | Stage V sporulation protein R-like                                                                        | 0  | 0 | 5  | 3 | 0 | 0 | 7  | 4 | 5  | 7  | 12 | 0.7 | No dramatic change | 0  | 12 | 0.0   | Soluble only        | 679 | 0  |
| ≥ 2 unique peptides | rmAC0861 | Q5V3R0_HALMA      | <i>tfeA</i>     | Transcription initiation factor IIE alpha subunit                                                         | 0  | 0 | 9  | 4 | 0 | 0 | 3  | 2 | 9  | 3  | 12 | 3.0 | 0.7 (>3X)          | 0  | 12 | 0.0   | Soluble only        | 176 | 0  |
| ≥ 2 unique peptides | rmAC2432 | Q5UZR1_HALMA      | <i>rpoH</i>     | DNA-directed RNA polymerase subunit H (EC 2.7.7.6)                                                        | 0  | 0 | 9  | 3 | 0 | 0 | 3  | 1 | 9  | 3  | 12 | 3.0 | 0.7 (>3X)          | 0  | 12 | 0.0   | Soluble only        | 75  | 0  |
| ≥ 2 unique peptides | rmAC0456 | Q5V4R6_HALMA      | <i>gyrB</i>     | DNA gyrase subunit B (EC 5.99.1.3)                                                                        | 0  | 0 | 7  | 4 | 0 | 0 | 5  | 5 | 7  | 5  | 12 | 1.4 | No dramatic change | 0  | 12 | 0.0   | Soluble only        | 642 | 0  |
| ≥ 2 unique peptides | rmB0067  | Q5UWS9_HALMA      | <i>rmB0067</i>  | Hypothetical protein                                                                                      | 12 | 6 | 0  | 0 | 0 | 0 | 0  | 0 | 12 | 0  | 12 | ∞   | 0.7 only           | 12 | 0  | 100.0 | Memb only           | 768 | 3  |
| ≥ 2 unique peptides | rmAC3079 | Q5UY58_HALMA      | <i>rmAC3079</i> | Hypothetical protein                                                                                      | 0  | 0 | 8  | 3 | 0 | 0 | 4  | 3 | 8  | 4  | 12 | 2.0 | 0.7 (2->3X)        | 0  | 12 | 0.0   | Soluble only        | 207 | 0  |
| ≥ 2 unique peptides | rmAC1365 | Q5V2F8_HALMA      | <i>rmAC1365</i> | Hypothetical protein                                                                                      | 7  | 5 | 0  | 0 | 5 | 4 | 0  | 0 | 7  | 5  | 12 | 1.4 | No dramatic change | 12 | 0  | 100.0 | Memb only           | 386 | 1  |
| ≥ 2 unique peptides | pNG6086  | Q5V748_HALMA      | <i>pNG6086</i>  | Hypothetical protein                                                                                      | 7  | 5 | 0  | 0 | 5 | 4 | 0  | 0 | 7  | 5  | 12 | 1.4 | No dramatic change | 12 | 0  | 100.0 | Memb only           | 356 | 0  |



|                     |          |                    |                 |                                                                                                                   |    |   |   |   |    |   |    |   |    |    |    |     |                    |    |    |       |                  |     |    |
|---------------------|----------|--------------------|-----------------|-------------------------------------------------------------------------------------------------------------------|----|---|---|---|----|---|----|---|----|----|----|-----|--------------------|----|----|-------|------------------|-----|----|
| ≥ 2 unique peptides | rmAC2611 | Q5UA3_HALMA        | <i>rmAC2611</i> | Hypothetical protein                                                                                              | 7  | 5 | 0 | 0 | 5  | 3 | 0  | 0 | 7  | 5  | 12 | 1.4 | No dramatic change | 12 | 0  | 100.0 | Memb only        | 245 | 2  |
| ≥ 2 unique peptides | rmAC0969 | Q5V3G3_HALMA       | <i>rmAC0969</i> | Hypothetical protein                                                                                              | 0  | 0 | 7 | 4 | 0  | 0 | 5  | 4 | 7  | 5  | 12 | 1.4 | No dramatic change | 0  | 12 | 0.0   | Soluble only     | 717 | 0  |
| ≥ 2 unique peptides | pNG7058  | Q5V6S6_HALMA       | <i>pNG7058</i>  | Hypothetical protein                                                                                              | 6  | 2 | 0 | 0 | 6  | 2 | 0  | 0 | 6  | 6  | 12 | 1.0 | No dramatic change | 12 | 0  | 100.0 | Memb only        | 166 | 0  |
| ≥ 2 unique peptides | rmAC1492 | Q5V237_HALMA       | <i>rmAC1492</i> | Hypothetical protein                                                                                              | 0  | 0 | 5 | 2 | 0  | 0 | 7  | 2 | 5  | 7  | 12 | 0.7 | No dramatic change | 0  | 12 | 0.0   | Soluble only     | 56  | 0  |
| ≥ 2 unique peptides | rmAC2772 | Q5UYX1_HALMA       | <i>rmAC2772</i> | Hypothetical protein                                                                                              | 0  | 0 | 4 | 2 | 0  | 0 | 8  | 4 | 4  | 8  | 12 | 0.5 | 1.2 (2-3X)         | 0  | 12 | 0.0   | Soluble only     | 538 | 0  |
| ≥ 2 unique peptides | rmAC0403 | Q5V4W3_HALMA       | <i>rmAC0403</i> | Hypothetical protein                                                                                              | 0  | 0 | 4 | 2 | 0  | 0 | 8  | 2 | 4  | 8  | 12 | 0.5 | 1.2 (2-3X)         | 0  | 12 | 0.0   | Soluble only     | 132 | 0  |
| ≥ 2 unique peptides | rmAC2575 | Q5UZD5_HALMA       | <i>rmAC2575</i> | Hypothetical protein                                                                                              | 0  | 0 | 2 | 1 | 0  | 0 | 10 | 3 | 2  | 10 | 12 | 0.2 | 1.2 (>3X)          | 0  | 12 | 0.0   | Soluble only     | 194 | 0  |
| ≥ 2 unique peptides | pNG6046  | Q5V7E1_HALMA       | <i>copA3</i>    | Copper-transporting ATPase (EC 3.6.3.4)                                                                           | 7  | 5 | 0 | 0 | 5  | 4 | 0  | 0 | 7  | 5  | 12 | 1.4 | No dramatic change | 12 | 0  | 100.0 | Memb only        | 868 | 8  |
| ≥ 2 unique peptides | rmB0242  | Q5UWD6_HALMA       | <i>acaB2</i>    | 3-ketoacyl-CoA thiolase (EC 2.3.1.9) (EC 2.3.1.16)                                                                | 0  | 0 | 7 | 4 | 0  | 0 | 5  | 3 | 7  | 5  | 12 | 1.4 | No dramatic change | 0  | 12 | 0.0   | Soluble only     | 428 | 0  |
| ≥ 2 unique peptides | rmAC1138 | Q5V311_HALMA       | <i>fbp1</i>     | Fructose-16-bisphosphatase (EC 3.1.3.11)                                                                          | 0  | 0 | 7 | 4 | 0  | 0 | 5  | 3 | 7  | 5  | 12 | 1.4 | No dramatic change | 0  | 12 | 0.0   | Soluble only     | 168 | 0  |
| ≥ 2 unique peptides | rmAC2882 | Q5UYM4_HALMA       | <i>maoC1</i>    | MaoC family protein                                                                                               | 6  | 4 | 0 | 0 | 6  | 4 | 0  | 0 | 6  | 6  | 12 | 1.0 | No dramatic change | 12 | 0  | 100.0 | Memb only        | 247 | 0  |
| ≥ 2 unique peptides | rmAC0206 | DAPB_HALMARReview  | <i>dapB</i>     | Dihydrodipicolinate reductase (EC 1.3.1.26) (DHPR)                                                                | 0  | 0 | 6 | 4 | 0  | 0 | 6  | 4 | 6  | 6  | 12 | 1.0 | No dramatic change | 0  | 12 | 0.0   | Soluble only     | 249 | 0  |
| ≥ 2 unique peptides | rmAC2248 | Q5V074_HALMA       | <i>csd2</i>     | Probable cysteine desulfurase (EC 4.4.1.-)                                                                        | 0  | 0 | 6 | 3 | 0  | 0 | 6  | 4 | 6  | 6  | 12 | 1.0 | No dramatic change | 0  | 12 | 0.0   | Soluble only     | 367 | 0  |
| ≥ 2 unique peptides | rmAC2232 | Q5V088_HALMA       | <i>pyrC</i>     | Dihydroorotase (EC 3.5.2.3)                                                                                       | 0  | 0 | 6 | 2 | 0  | 0 | 6  | 2 | 6  | 6  | 12 | 1.0 | No dramatic change | 0  | 12 | 0.0   | Soluble only     | 443 | 0  |
| ≥ 2 unique peptides | rmAC3458 | Q5UX68_HALMA       | <i>rmAC3458</i> | Anhydrase family 3 protein                                                                                        | 0  | 0 | 4 | 2 | 0  | 0 | 8  | 3 | 4  | 8  | 12 | 0.5 | 1.2 (2-3X)         | 0  | 12 | 0.0   | Soluble only     | 170 | 0  |
| ≥ 2 unique peptides | rmAC3272 | Q5UXN5_HALMA       | <i>purU</i>     | Formyltetrahydrofolate deformylase (EC 3.5.1.10) (EC 2.1.2.2)                                                     | 0  | 0 | 4 | 2 | 0  | 0 | 8  | 3 | 4  | 8  | 12 | 0.5 | 1.2 (2-3X)         | 0  | 12 | 0.0   | Soluble only     | 277 | 0  |
| ≥ 2 unique peptides | rmAC1906 | Q5V122_HALMA       | <i>tas</i>      | Probable oxidoreductase                                                                                           | 0  | 0 | 3 | 2 | 0  | 0 | 9  | 5 | 3  | 9  | 12 | 0.3 | 1.2 (>3X)          | 0  | 12 | 0.0   | Soluble only     | 343 | 0  |
| ≥ 2 unique peptides | pNG7060  | Q5V6S4_HALMA       | <i>fmdA</i>     | Formamidase                                                                                                       | 0  | 0 | 2 | 2 | 0  | 0 | 10 | 6 | 2  | 10 | 12 | 0.2 | 1.2 (>3X)          | 0  | 12 | 0.0   | Soluble only     | 433 | 0  |
| ≥ 2 unique peptides | rmAC0178 | Q5V5G0_HALMA       | <i>pop</i>      | Prolyl oligopeptidase family protein                                                                              | 0  | 0 | 4 | 3 | 0  | 0 | 8  | 3 | 4  | 8  | 12 | 0.5 | 1.2 (2-3X)         | 0  | 12 | 0.0   | Soluble only     | 574 | 0  |
| ≥ 2 unique peptides | rmAC3112 | RL39_HALMARReview  | <i>rpl39e</i>   | 50S ribosomal protein L39e (HI39e) (HI46e)                                                                        | 7  | 2 | 0 | 0 | 5  | 1 | 0  | 0 | 7  | 5  | 12 | 1.4 | No dramatic change | 12 | 0  | 100.0 | Memb only        | 50  | 0  |
| ≥ 2 unique peptides | rmAC0056 | Q5V5R4_HALMA       | <i>mrp1</i>     | Mrp protein-like                                                                                                  | 0  | 0 | 5 | 4 | 0  | 0 | 7  | 4 | 5  | 7  | 12 | 0.7 | No dramatic change | 0  | 12 | 0.0   | Soluble only     | 353 | 0  |
| ≥ 2 unique peptides | rmB0192  | Q5UWH6_HALMA       | <i>usp1</i>     | Universal stress protein 1                                                                                        | 6  | 3 | 4 | 2 | 0  | 0 | 2  | 2 | 10 | 2  | 12 | 5.0 | 0.7 (>3X)          | 6  | 6  | 50.0  | Memb + Sol       | 294 | 0  |
| ≥ 2 unique peptides | rmAC3127 | Q5UY17_HALMA       | <i>livF-7</i>   | Branched-chain amino acid ABC transporter ATP-binding protein                                                     | 3  | 2 | 0 | 0 | 9  | 4 | 0  | 0 | 3  | 9  | 12 | 0.3 | 1.2 (>3X)          | 12 | 0  | 100.0 | Memb only        | 247 | 0  |
| ≥ 2 unique peptides | rmAC2148 | Q5V0G1_HALMA       | <i>pstC2</i>    | Phosphate ABC transporter permease protein                                                                        | 1  | 1 | 0 | 0 | 11 | 4 | 0  | 0 | 1  | 11 | 12 | 0.1 | 1.2 (>3X)          | 12 | 0  | 100.0 | Memb only        | 373 | 8  |
| ≥ 2 unique peptides | rmAC1165 | Y1165_HALMARReview | <i>rmAC1165</i> | UPF0212 protein rmAC1165                                                                                          | 0  | 0 | 5 | 2 | 0  | 0 | 6  | 2 | 5  | 6  | 11 | 0.8 | No dramatic change | 0  | 11 | 0.0   | Soluble only     | 157 | 0  |
| ≥ 2 unique peptides | rmAC0062 | RPOD_HALMARReview  | <i>rpoD</i>     | DNA-directed RNA polymerase subunit D (EC 2.7.7.6)                                                                | 0  | 0 | 4 | 3 | 0  | 0 | 7  | 5 | 4  | 7  | 11 | 0.6 | No dramatic change | 0  | 11 | 0.0   | Soluble only     | 259 | 0  |
| ≥ 2 unique peptides | rmAC0265 | Q5V580_HALMA       | <i>apl</i>      | AP-endonuclease/AP-lyase (EC 3.1.21.2) (EC 4.2.99.18)                                                             | 0  | 0 | 4 | 2 | 0  | 0 | 7  | 5 | 4  | 7  | 11 | 0.6 | No dramatic change | 0  | 11 | 0.0   | Soluble only     | 322 | 0  |
| ≥ 2 unique peptides | rmAC3015 | Q5UYB2_HALMA       | <i>rmAC3015</i> | Hypothetical protein                                                                                              | 11 | 2 | 0 | 0 | 0  | 0 | 0  | 0 | 11 | 0  | 11 | ∞   | 0.7 only           | 11 | 0  | 100.0 | Memb only        | 236 | 6  |
| ≥ 2 unique peptides | pNG7384  | Q5V5X8_HALMA       | <i>pNG7384</i>  | Hypothetical protein                                                                                              | 8  | 4 | 0 | 0 | 3  | 2 | 0  | 0 | 8  | 3  | 11 | 2.7 | 0.7 (2-3X)         | 11 | 0  | 100.0 | Memb only        | 241 | 0  |
| ≥ 2 unique peptides | rmAC2913 | Q5UYK0_HALMA       | <i>rmAC2913</i> | Hypothetical protein                                                                                              | 7  | 5 | 0 | 0 | 4  | 2 | 0  | 0 | 7  | 4  | 11 | 1.8 | No dramatic change | 11 | 0  | 100.0 | Memb only        | 337 | 8  |
| ≥ 2 unique peptides | rmAC2421 | Q5UZS0_HALMA       | <i>rmAC2421</i> | Hypothetical protein                                                                                              | 7  | 4 | 0 | 0 | 4  | 1 | 0  | 0 | 7  | 4  | 11 | 1.8 | No dramatic change | 11 | 0  | 100.0 | Memb only        | 460 | 0  |
| ≥ 2 unique peptides | rmAC2226 | Q5V094_HALMA       | <i>rmAC2226</i> | Hypothetical protein                                                                                              | 0  | 0 | 7 | 4 | 0  | 0 | 4  | 3 | 7  | 4  | 11 | 1.8 | No dramatic change | 0  | 11 | 0.0   | Soluble only     | 172 | 0  |
| ≥ 2 unique peptides | rmAC2856 | Q5UYP7_HALMA       | <i>rmAC2856</i> | Hypothetical protein                                                                                              | 0  | 0 | 7 | 2 | 0  | 0 | 4  | 1 | 7  | 4  | 11 | 1.8 | No dramatic change | 0  | 11 | 0.0   | Soluble only     | 58  | 0  |
| ≥ 2 unique peptides | rmAC0863 | Q5V3Q8_HALMA       | <i>rmAC0863</i> | Hypothetical protein                                                                                              | 5  | 2 | 0 | 0 | 6  | 3 | 0  | 0 | 5  | 6  | 11 | 0.8 | No dramatic change | 11 | 0  | 100.0 | Memb only        | 260 | 2  |
| ≥ 2 unique peptides | rmAC1684 | Q5V1K9_HALMA       | <i>rmAC1684</i> | Hypothetical protein                                                                                              | 0  | 0 | 3 | 2 | 0  | 0 | 8  | 3 | 3  | 8  | 11 | 0.4 | 1.2 (2-3X)         | 0  | 11 | 0.0   | Soluble only     | 153 | 0  |
| ≥ 2 unique peptides | rmAC2241 | Q5V081_HALMA       | <i>rmAC2241</i> | Quinolate phosphoribosyl transferase (EC 2.4.2.19)                                                                | 0  | 0 | 9 | 3 | 0  | 0 | 2  | 2 | 9  | 2  | 11 | 4.5 | 0.7 (>3X)          | 0  | 11 | 0.0   | Soluble only     | 387 | 0  |
| ≥ 2 unique peptides | rmAC0330 | Q5V522_HALMA       | <i>ilvB2</i>    | Acetolactate synthase (EC 2.2.1.6)                                                                                | 3  | 2 | 5 | 2 | 1  | 1 | 2  | 1 | 8  | 3  | 11 | 2.7 | 0.7 (2-3X)         | 4  | 7  | 36.4  | Memb + Sol       | 585 | 0  |
| ≥ 2 unique peptides | rmAC1705 | Q5V1J1_HALMA       | <i>moeA1</i>    | Molybdenum cofactor biosynthesis protein                                                                          | 0  | 0 | 8 | 6 | 0  | 0 | 3  | 3 | 8  | 3  | 11 | 2.7 | 0.7 (2-3X)         | 0  | 11 | 0.0   | Soluble only     | 342 | 0  |
| ≥ 2 unique peptides | rmAC0132 | Q5V5J8_HALMA       | <i>rmAC0132</i> | Lysine-ketoglutarate reductase/saccharopine dehydrogenase (EC 1.5.1.7)(EC 1.5.1.10)                               | 0  | 0 | 7 | 3 | 0  | 0 | 4  | 2 | 7  | 4  | 11 | 1.8 | No dramatic change | 0  | 11 | 0.0   | Soluble only     | 429 | 0  |
| ≥ 2 unique peptides | rmAC0357 | Q5V4Z9_HALMA       | <i>dcuC</i>     | C4-dicarboxylate anaerobic carrier                                                                                | 6  | 2 | 0 | 0 | 5  | 2 | 0  | 0 | 6  | 5  | 11 | 1.2 | No dramatic change | 11 | 0  | 100.0 | Memb only        | 689 | 15 |
| ≥ 2 unique peptides | rmAC3173 | SYK_HALMARReview   | <i>lysS</i>     | Lysyl-tRNA synthetase (EC 6.1.1.6) (Lysine-tRNA ligase) (LysRS)                                                   | 0  | 0 | 6 | 3 | 0  | 0 | 5  | 2 | 6  | 5  | 11 | 1.2 | No dramatic change | 0  | 11 | 0.0   | Soluble only     | 545 | 0  |
| ≥ 2 unique peptides | rmAC1438 | Q5V287_HALMA       | <i>taqD</i>     | Glycerol-3-phosphate cytidyltransferase                                                                           | 0  | 0 | 6 | 2 | 0  | 0 | 5  | 1 | 6  | 5  | 11 | 1.2 | No dramatic change | 0  | 11 | 0.0   | Soluble only     | 116 | 0  |
| ≥ 2 unique peptides | rmAC2450 | Q5UZP5_HALMA       | <i>trxA9</i>    | Thioredoxin                                                                                                       | 0  | 0 | 4 | 2 | 0  | 0 | 7  | 4 | 4  | 7  | 11 | 0.6 | No dramatic change | 0  | 11 | 0.0   | Soluble only     | 211 | 0  |
| ≥ 2 unique peptides | rmAC3039 | Q5UY90_HALMA       | <i>hpcEb</i>    | 2-hydroxyhepta-2,4-diene-1,7-dioate isomerase                                                                     | 0  | 0 | 4 | 2 | 0  | 0 | 7  | 3 | 4  | 7  | 11 | 0.6 | No dramatic change | 0  | 11 | 0.0   | Soluble only     | 238 | 0  |
| ≥ 2 unique peptides | pNG7278  | Q5V676_HALMA       | <i>adh12</i>    | Alcohol dehydrogenase (EC 1.1.1.1)                                                                                | 0  | 0 | 4 | 1 | 0  | 0 | 7  | 3 | 4  | 7  | 11 | 0.6 | No dramatic change | 0  | 11 | 0.0   | Soluble only     | 384 | 0  |
| ≥ 2 unique peptides | rmAC1616 | Q5V1S0_HALMA       | <i>mch</i>      | N(5)N(10)-methenyltetrahydromethanopterin cyclohydrolase (EC 3.5.4.27)                                            | 0  | 0 | 2 | 2 | 0  | 0 | 9  | 6 | 2  | 9  | 11 | 0.2 | 1.2 (>3X)          | 0  | 11 | 0.0   | Soluble only     | 310 | 0  |
| ≥ 2 unique peptides | rmAC0334 | LEU2_HALMARReview  | <i>leuC</i>     | 3-isopropylmalate dehydratase large subunit (EC 4.2.1.33)(isopropylmalate isomerase) (Alpha-IPM isomerase) (IPMI) | 0  | 0 | 2 | 1 | 0  | 0 | 9  | 5 | 2  | 9  | 11 | 0.2 | 1.2 (>3X)          | 0  | 11 | 0.0   | Soluble only     | 473 | 0  |
| ≥ 2 unique peptides | rmAC2367 | Q5UZW9_HALMA       | <i>ribC</i>     | Riboflavin synthase alpha chain (EC 2.5.1.9)                                                                      | 0  | 0 | 2 | 2 | 0  | 0 | 9  | 4 | 2  | 9  | 11 | 0.2 | 1.2 (>3X)          | 0  | 11 | 0.0   | Soluble only     | 192 | 0  |
| ≥ 2 unique peptides | rmAC1740 | Q5V1G0_HALMA       | <i>mvaS</i>     | Hydroxymethylglutaryl-CoA synthase (EC 2.3.3.10)                                                                  | 0  | 0 | 1 | 1 | 0  | 0 | 10 | 7 | 1  | 10 | 11 | 0.1 | 1.2 (>3X)          | 0  | 11 | 0.0   | Soluble only     | 445 | 0  |
| ≥ 2 unique peptides | rmAC0929 | Q5V3J9_HALMA       | <i>acaB4</i>    | 3-ketoacyl-CoA thiolase (EC 2.3.1.16)                                                                             | 0  | 0 | 1 | 1 | 0  | 0 | 10 | 7 | 1  | 10 | 11 | 0.1 | 1.2 (>3X)          | 0  | 11 | 0.0   | Soluble only     | 388 | 0  |
| ≥ 2 unique peptides | pNG1026  | Q5V881_HALMA       | <i>flaA2</i>    | Flagellin A protein                                                                                               | 5  | 2 | 0 | 0 | 6  | 2 | 0  | 0 | 5  | 6  | 11 | 0.8 | No dramatic change | 11 | 0  | 100.0 | Memb only        | 463 | 1  |
| ≥ 2 unique peptides | rmAC0441 | Y441_HALMARReview  | <i>rmAC0441</i> | UPF0212 protein rmAC0441                                                                                          | 0  | 0 | 6 | 2 | 0  | 0 | 5  | 3 | 6  | 5  | 11 | 1.2 | No dramatic change | 0  | 11 | 0.0   | Soluble only     | 123 | 0  |
| ≥ 2 unique peptides | rmAC3544 | Q5UWZ3_HALMA       | <i>hpxX4</i>    | Protease heat shock protein HpxX (EC 3.4.24.-)                                                                    | 4  | 2 | 0 | 0 | 6  | 1 | 1  | 1 | 4  | 7  | 11 | 0.6 | No dramatic change | 10 | 1  | 90.9  | Memb predominant | 353 | 4  |
| ≥ 2 unique peptides | rmAC0055 | RS17E_HALMARReview | <i>rps17e</i>   | 30S ribosomal protein S17e (Ribosomal protein HS26)                                                               | 0  | 0 | 6 | 2 | 0  | 0 | 5  | 1 | 6  | 5  | 11 | 1.2 | No dramatic change | 0  | 11 | 0.0   | Soluble only     | 63  | 0  |
| ≥ 2 unique peptides | rmAC0138 | Q5V5J2_HALMA       | <i>ef2B1</i>    | Probable translation initiation factor 2 beta subunit                                                             | 0  | 0 | 4 | 4 | 0  | 0 | 7  | 3 | 4  | 7  | 11 | 0.6 | No dramatic change | 0  | 11 | 0.0   | Soluble only     | 203 | 0  |

|                     |          |                  |                 |                                                               |   |   |   |   |   |   |   |   |   |    |    |     |                    |    |    |       |                     |     |    |
|---------------------|----------|------------------|-----------------|---------------------------------------------------------------|---|---|---|---|---|---|---|---|---|----|----|-----|--------------------|----|----|-------|---------------------|-----|----|
| ≥ 2 unique peptides | rmAC0269 | Q5V576_HALMA     | <i>gfp1</i>     | GTP-binding protein                                           | 0 | 0 | 6 | 4 | 0 | 0 | 5 | 3 | 6 | 5  | 11 | 1.2 | No dramatic change | 0  | 11 | 0.0   | Soluble only        | 393 | 0  |
| ≥ 2 unique peptides | rmAC2223 | Q5V097_HALMA     | <i>usp2</i>     | Universal stress protein family                               | 0 | 0 | 6 | 4 | 0 | 0 | 5 | 2 | 6 | 5  | 11 | 1.2 | No dramatic change | 0  | 11 | 0.0   | Soluble only        | 128 | 0  |
| ≥ 2 unique peptides | rmAC0716 | Q5V443_HALMA     | <i>usp6</i>     | Universal stress protein                                      | 0 | 0 | 3 | 2 | 6 | 3 | 2 | 1 | 3 | 8  | 11 | 0.4 | 1.2 (2-3X)         | 6  | 5  | 54.5  | Memb + Sol          | 288 | 0  |
| ≥ 2 unique peptides | rmAC0379 | Q5V4Y1_HALMA     | <i>glnQ2</i>    | Glutamine ABC transporter                                     | 5 | 3 | 1 | 1 | 3 | 2 | 2 | 1 | 6 | 5  | 11 | 1.2 | No dramatic change | 8  | 3  | 72.7  | Memb + Sol          | 250 | 0  |
| ≥ 2 unique peptides | rmAC3128 | Q5UY16_HALMA     | <i>livG-9</i>   | Branched-chain amino acid ABC transporter ATP-binding protein | 5 | 4 | 0 | 0 | 6 | 4 | 0 | 0 | 5 | 6  | 11 | 0.8 | No dramatic change | 11 | 0  | 100.0 | Memb only           | 252 | 0  |
| ≥ 2 unique peptides | rmAC2082 | Q5V0L8_HALMA     | <i>dhp</i>      | Hypothetical protein dhp                                      | 0 | 0 | 4 | 2 | 0 | 0 | 7 | 4 | 4 | 7  | 11 | 0.6 | No dramatic change | 0  | 11 | 0.0   | Soluble only        | 130 | 0  |
| ≥ 2 unique peptides | rmAC2175 | Q5V0D5_HALMA     | <i>seb</i>      | Selenium-binding protein                                      | 0 | 0 | 3 | 2 | 0 | 0 | 8 | 4 | 3 | 8  | 11 | 0.4 | 1.2 (2-3X)         | 0  | 11 | 0.0   | Soluble only        | 464 | 0  |
| ≥ 2 unique peptides | rmAC3013 | Q5UYB4_HALMA     | <i>tup1</i>     | Tup1 like transcriptional repressor                           | 0 | 0 | 8 | 3 | 0 | 0 | 2 | 1 | 8 | 2  | 10 | 4.0 | 0.7 (>3X)          | 0  | 10 | 0.0   | Soluble only        | 421 | 0  |
| ≥ 2 unique peptides | rmAC3381 | Q5UXD9_HALMA     | <i>lpdA1</i>    | Dihydrolipoamide dehydrogenase (EC 1.8.1.4)                   | 0 | 0 | 5 | 3 | 0 | 0 | 5 | 4 | 5 | 5  | 10 | 1.0 | No dramatic change | 0  | 10 | 0.0   | Soluble only        | 466 | 0  |
| ≥ 2 unique peptides | rmAC1218 | Q5V2U0_HALMA     | <i>rmAC1218</i> | Hypothetical protein                                          | 7 | 6 | 0 | 0 | 3 | 3 | 0 | 0 | 7 | 3  | 10 | 2.3 | 0.7 (2-3X)         | 10 | 0  | 100.0 | Memb only           | 606 | 2  |
| ≥ 2 unique peptides | rmAC2074 | Q5V0M5_HALMA     | <i>rmAC2074</i> | Hypothetical protein                                          | 7 | 4 | 0 | 0 | 3 | 2 | 0 | 0 | 7 | 3  | 10 | 2.3 | 0.7 (2-3X)         | 10 | 0  | 100.0 | Memb only           | 536 | 12 |
| ≥ 2 unique peptides | pNG7166  | Q5V610_HALMA     | <i>pNG7166</i>  | Hypothetical protein                                          | 7 | 2 | 0 | 0 | 3 | 1 | 0 | 0 | 7 | 3  | 10 | 2.3 | 0.7 (2-3X)         | 10 | 0  | 100.0 | Memb only           | 330 | 4  |
| ≥ 2 unique peptides | rmAC2598 | Q5UZB5_HALMA     | <i>rmAC2598</i> | Hypothetical protein                                          | 0 | 0 | 6 | 3 | 0 | 0 | 4 | 3 | 6 | 4  | 10 | 1.5 | No dramatic change | 0  | 10 | 0.0   | Soluble only        | 123 | 0  |
| ≥ 2 unique peptides | rmAC2866 | Q5UYN7_HALMA     | <i>rmAC2866</i> | Hypothetical protein                                          | 0 | 0 | 6 | 3 | 0 | 0 | 4 | 2 | 6 | 4  | 10 | 1.5 | No dramatic change | 0  | 10 | 0.0   | Soluble only        | 128 | 0  |
| ≥ 2 unique peptides | rmAC3202 | Q5XU7_HALMA      | <i>rmAC3202</i> | Hypothetical protein                                          | 5 | 3 | 0 | 0 | 5 | 4 | 0 | 0 | 5 | 5  | 10 | 1.0 | No dramatic change | 10 | 0  | 100.0 | Memb only           | 602 | 0  |
| ≥ 2 unique peptides | rmAC0675 | Q5V475_HALMA     | <i>rmAC0675</i> | Hypothetical protein                                          | 5 | 3 | 0 | 0 | 5 | 3 | 0 | 0 | 5 | 5  | 10 | 1.0 | No dramatic change | 10 | 0  | 100.0 | Memb only           | 314 | 6  |
| ≥ 2 unique peptides | rmAC1031 | Q5V3A6_HALMA     | <i>rmAC1031</i> | Hypothetical protein                                          | 4 | 1 | 0 | 0 | 6 | 4 | 0 | 0 | 4 | 6  | 10 | 0.7 | No dramatic change | 10 | 0  | 100.0 | Memb only           | 674 | 1  |
| ≥ 2 unique peptides | rmAC1808 | Q5V1A6_HALMA     | <i>rmAC1808</i> | Hypothetical protein                                          | 0 | 0 | 4 | 2 | 0 | 0 | 6 | 5 | 4 | 6  | 10 | 0.7 | No dramatic change | 0  | 10 | 0.0   | Soluble only        | 144 | 0  |
| ≥ 2 unique peptides | rmAC0521 | Q5V4L1_HALMA     | <i>rmAC0521</i> | Hypothetical protein                                          | 0 | 0 | 2 | 2 | 0 | 0 | 8 | 3 | 2 | 8  | 10 | 0.3 | 1.2 (>3X)          | 0  | 10 | 0.0   | Soluble only        | 270 | 0  |
| ≥ 2 unique peptides | rmB0219  | Q5UWF4_HALMA     | <i>gabD</i>     | Succinate-semialdehyde dehydrogenase                          | 0 | 0 | 9 | 4 | 0 | 0 | 1 | 1 | 9 | 1  | 10 | 9.0 | 0.7 (>3X)          | 0  | 10 | 0.0   | Soluble only        | 453 | 0  |
| ≥ 2 unique peptides | rmB0209  | Q5UWG1_HALMA     | <i>ilvB3</i>    | Acetolactate synthase large subunit (EC 2.2.1.6)              | 0 | 0 | 7 | 3 | 0 | 0 | 3 | 3 | 7 | 3  | 10 | 2.3 | 0.7 (2-3X)         | 0  | 10 | 0.0   | Soluble only        | 567 | 0  |
| ≥ 2 unique peptides | rmAC0011 | Q5V5V6_HALMA     | <i>ywjD1</i>    | Glucose 1-dehydrogenase (EC 1.1.1.47)                         | 0 | 0 | 7 | 3 | 0 | 0 | 3 | 2 | 7 | 3  | 10 | 2.3 | 0.7 (2-3X)         | 0  | 10 | 0.0   | Soluble only        | 236 | 0  |
| ≥ 2 unique peptides | rmAC2521 | Q5UZH9_HALMA     | <i>pyrE1</i>    | Orotate phosphoribosyltransferase (EC 2.4.2.10)               | 0 | 0 | 6 | 2 | 0 | 0 | 4 | 2 | 6 | 4  | 10 | 1.5 | No dramatic change | 0  | 10 | 0.0   | Soluble only        | 183 | 0  |
| ≥ 2 unique peptides | rmAC0320 | Q5V532_HALMA     | <i>ubiA</i>     | Prenyltransferase                                             | 5 | 2 | 0 | 0 | 5 | 1 | 0 | 0 | 5 | 5  | 10 | 1.0 | No dramatic change | 10 | 0  | 100.0 | Memb only           | 294 | 7  |
| ≥ 2 unique peptides | rmAC0657 | Q5V491_HALMA     | <i>rmAC0657</i> | P-hydroxybenzoate hydroxylase (EC 1.14.13.2)                  | 3 | 3 | 1 | 1 | 6 | 6 | 0 | 0 | 4 | 6  | 10 | 0.7 | No dramatic change | 9  | 1  | 90.0  | Memb predominant    | 472 | 0  |
| ≥ 2 unique peptides | rmAC1983 | Q5V0V5_HALMA     | <i>acd1</i>     | Acyl-CoA dehydrogenase (EC 1.3.99.3)                          | 0 | 0 | 4 | 3 | 0 | 0 | 6 | 4 | 4 | 6  | 10 | 0.7 | No dramatic change | 0  | 10 | 0.0   | Soluble only        | 584 | 0  |
| ≥ 2 unique peptides | rmAC1485 | Q5V242_HALMA     | <i>yjID4</i>    | NADH dehydrogenase (EC 1.6.99.3)                              | 0 | 0 | 4 | 2 | 0 | 0 | 6 | 3 | 4 | 6  | 10 | 0.7 | No dramatic change | 0  | 10 | 0.0   | Soluble only        | 380 | 0  |
| ≥ 2 unique peptides | rmAC3104 | Q5UY37_HALMA     | <i>csd1</i>     | Probable cysteine desulfurase (EC 4.4.1.-)                    | 0 | 0 | 3 | 1 | 1 | 1 | 6 | 3 | 3 | 7  | 10 | 0.4 | 1.2 (2-3X)         | 1  | 9  | 10.0  | Soluble predominant | 415 | 0  |
| ≥ 2 unique peptides | rmAC0482 | Q5V4P5_HALMA     | <i>yajO</i>     | Putative NAD(P)H-dependent xylose reductase                   | 0 | 0 | 3 | 2 | 0 | 0 | 7 | 6 | 3 | 7  | 10 | 0.4 | 1.2 (2-3X)         | 0  | 10 | 0.0   | Soluble only        | 325 | 0  |
| ≥ 2 unique peptides | rmAC3232 | Q5UXR9_HALMA     | <i>graD4c</i>   | Glucose-1-phosphate thymidyltransferase                       | 0 | 0 | 3 | 1 | 0 | 0 | 7 | 3 | 3 | 7  | 10 | 0.4 | 1.2 (2-3X)         | 0  | 10 | 0.0   | Soluble only        | 396 | 0  |
| ≥ 2 unique peptides | pNG7279  | Q5V675_HALMA     | <i>pNG7279</i>  | Putative pyridine nucleotide-disulphide oxidoreductase        | 0 | 0 | 2 | 2 | 0 | 0 | 8 | 6 | 2 | 8  | 10 | 0.3 | 1.2 (>3X)          | 0  | 10 | 0.0   | Soluble only        | 199 | 0  |
| ≥ 2 unique peptides | rmAC0296 | Q5V551_HALMA     | <i>htrA1</i>    | Serine protease HtrA                                          | 7 | 4 | 0 | 0 | 3 | 3 | 0 | 0 | 7 | 3  | 10 | 2.3 | 0.7 (2-3X)         | 10 | 0  | 100.0 | Memb only           | 361 | 0  |
| ≥ 2 unique peptides | rmAC0442 | Q5V4S6_HALMA     | <i>psmA3</i>    | Proteasome subunit alpha                                      | 0 | 0 | 6 | 2 | 0 | 0 | 4 | 3 | 6 | 4  | 10 | 1.5 | No dramatic change | 0  | 10 | 0.0   | Soluble only        | 240 | 0  |
| ≥ 2 unique peptides | rmAC2679 | Q5UZ49_HALMA     | <i>rimK</i>     | Ribosomal protein S6 modification protein                     | 0 | 0 | 9 | 5 | 0 | 0 | 1 | 1 | 9 | 1  | 10 | 9.0 | 0.7 (>3X)          | 0  | 10 | 0.0   | Soluble only        | 326 | 0  |
| ≥ 2 unique peptides | rmAC3340 | Q5UXH3_HALMA     | <i>grpE</i>     | Heat shock protein GrpE protein                               | 0 | 0 | 3 | 3 | 0 | 0 | 7 | 6 | 3 | 7  | 10 | 0.4 | 1.2 (2-3X)         | 0  | 10 | 0.0   | Soluble only        | 226 | 0  |
| ≥ 2 unique peptides | rmAC3113 | RL31_HALMAReview | <i>rpl31e</i>   | 50S ribosomal protein L31e (L34) (H30)                        | 2 | 1 | 2 | 2 | 5 | 2 | 1 | 1 | 4 | 6  | 10 | 0.7 | No dramatic change | 7  | 3  | 70.0  | Memb + Sol          | 92  | 0  |
| ≥ 2 unique peptides | pNG7373  | Q5V5Y9_HALMA     | <i>usp25</i>    | Universal stress protein                                      | 0 | 0 | 0 | 0 | 3 | 1 | 7 | 2 | 0 | 10 | 10 | 0.0 | 1.2 only           | 3  | 7  | 30.0  | Memb + Sol          | 147 | 0  |
| ≥ 2 unique peptides | rmAC3124 | Q5UY20_HALMA     | <i>srp54</i>    | Signal recognition 54 kDa protein                             | 2 | 2 | 6 | 3 | 0 | 0 | 2 | 2 | 8 | 2  | 10 | 4.0 | 0.7 (>3X)          | 2  | 8  | 20.0  | Soluble predominant | 469 | 0  |
| ≥ 2 unique peptides | rmAC1029 | Q5V3A8_HALMA     | <i>rmAC1029</i> | ABC transporter ATP-binding protein                           | 6 | 2 | 0 | 0 | 4 | 2 | 0 | 0 | 6 | 4  | 10 | 1.5 | No dramatic change | 10 | 0  | 100.0 | Memb only           | 254 | 0  |
| ≥ 2 unique peptides | rmAC0665 | Q5V483_HALMA     | <i>abcP-2</i>   | ABC transporter permease protein                              | 5 | 4 | 0 | 0 | 5 | 4 | 0 | 0 | 5 | 5  | 10 | 1.0 | No dramatic change | 10 | 0  | 100.0 | Memb only           | 411 | 4  |
| ≥ 2 unique peptides | rmAC2465 | Q5UZN1_HALMA     | <i>livG-6</i>   | Branched-chain amino acid ABC transporter ATP-binding protein | 4 | 4 | 0 | 0 | 6 | 4 | 0 | 0 | 4 | 6  | 10 | 0.7 | No dramatic change | 10 | 0  | 100.0 | Memb only           | 270 | 0  |
| ≥ 2 unique peptides | pNG7023  | Q5V6V6_HALMA     | <i>rbsB-1</i>   | Putative ABC transporter substrate-binding protein            | 4 | 3 | 0 | 0 | 6 | 4 | 0 | 0 | 4 | 6  | 10 | 0.7 | No dramatic change | 10 | 0  | 100.0 | Memb only           | 483 | 0  |
| ≥ 2 unique peptides | rmAC1747 | Q5V1F5_HALMA     | <i>glnQ1</i>    | Glutamine ABC transporter ATP-binding protein                 | 4 | 3 | 0 | 0 | 6 | 3 | 0 | 0 | 4 | 6  | 10 | 0.7 | No dramatic change | 10 | 0  | 100.0 | Memb only           | 250 | 0  |
| ≥ 2 unique peptides | rmAC3369 | Q5UXE7_HALMA     | <i>htIA</i>     | Hypothetical protein htIA                                     | 5 | 3 | 0 | 0 | 5 | 3 | 0 | 0 | 5 | 5  | 10 | 1.0 | No dramatic change | 10 | 0  | 100.0 | Memb only           | 368 | 7  |
| ≥ 2 unique peptides | rmAC2487 | Q5UZL1_HALMA     | <i>rfcC2</i>    | Replication factor C small subunit                            | 0 | 0 | 5 | 2 | 0 | 0 | 4 | 3 | 5 | 4  | 9  | 1.3 | No dramatic change | 0  | 9  | 0.0   | Soluble only        | 335 | 0  |
| ≥ 2 unique peptides | rmAC1767 | Q5V1D9_HALMA     | <i>tenA-2</i>   | Transcriptional regulator putative                            | 0 | 0 | 0 | 0 | 0 | 0 | 9 | 4 | 0 | 9  | 9  | 0.0 | 1.2 only           | 0  | 9  | 0.0   | Soluble only        | 255 | 0  |
| ≥ 2 unique peptides | rmAC3351 | Q5UXG3_HALMA     | <i>rmAC3351</i> | Hypothetical protein                                          | 5 | 3 | 1 | 1 | 3 | 2 | 0 | 0 | 6 | 3  | 9  | 2.0 | 0.7 (2-3X)         | 8  | 1  | 88.9  | Memb predominant    | 453 | 0  |
| ≥ 2 unique peptides | rmAC1101 | Q5V342_HALMA     | <i>rmAC1101</i> | Hypothetical protein                                          | 1 | 1 | 5 | 5 | 0 | 0 | 3 | 2 | 6 | 3  | 9  | 2.0 | 0.7 (2-3X)         | 1  | 8  | 11.1  | Soluble predominant | 346 | 0  |
| ≥ 2 unique peptides | pNG7225  | Q5V6C4_HALMA     | <i>pNG7225</i>  | Hypothetical protein                                          | 0 | 0 | 6 | 3 | 0 | 0 | 3 | 2 | 6 | 3  | 9  | 2.0 | 0.7 (2-3X)         | 0  | 9  | 0.0   | Soluble only        | 596 | 0  |
| ≥ 2 unique peptides | rmB0271  | Q5UWB1_HALMA     | <i>rmB0271</i>  | Hypothetical protein                                          | 5 | 2 | 0 | 0 | 4 | 2 | 0 | 0 | 5 | 4  | 9  | 1.3 | No dramatic change | 9  | 0  | 100.0 | Memb only           | 412 | 13 |
| ≥ 2 unique peptides | rmAC2578 | Q5UZD2_HALMA     | <i>rmAC2578</i> | Hypothetical protein                                          | 4 | 2 | 0 | 0 | 5 | 3 | 0 | 0 | 4 | 5  | 9  | 0.8 | No dramatic change | 9  | 0  | 100.0 | Memb only           | 897 | 20 |
| ≥ 2 unique peptides | rmAC0291 | Q5V555_HALMA     | <i>rmAC0291</i> | Hypothetical protein                                          | 4 | 1 | 0 | 0 | 5 | 3 | 0 | 0 | 4 | 5  | 9  | 0.8 | No dramatic change | 9  | 0  | 100.0 | Memb only           | 364 | 7  |
| ≥ 2 unique peptides | rmAC2960 | Q5UYG0_HALMA     | <i>rmAC2960</i> | Hypothetical protein                                          | 0 | 0 | 4 | 2 | 0 | 0 | 5 | 3 | 4 | 5  | 9  | 0.8 | No dramatic change | 0  | 9  | 0.0   | Soluble only        | 125 | 0  |
| ≥ 2 unique peptides | rmAC2242 | Q5V080_HALMA     | <i>rmAC2242</i> | Hypothetical protein                                          | 0 | 0 | 4 | 1 | 0 | 0 | 5 | 2 | 4 | 5  | 9  | 0.8 | No dramatic change | 0  | 9  | 0.0   | Soluble only        | 94  | 0  |
| ≥ 2 unique peptides | rmAC3055 | Q5UY79_HALMA     | <i>rmAC3055</i> | Hypothetical protein                                          | 0 | 0 | 0 | 0 | 0 | 0 | 9 | 4 | 0 | 9  | 9  | 0.0 | 1.2 only           | 0  | 9  | 0.0   | Soluble only        | 442 | 0  |
| ≥ 2 unique peptides | rmAC1378 | Q5V2E5_HALMA     | <i>pan1a</i>    | Membrane protein Pan1                                         | 9 | 4 | 0 | 0 | 0 | 0 | 0 | 0 | 9 | 0  | 9  | ∞   | 0.7 only           | 9  | 0  | 100.0 | Memb only           | 383 | 0  |

|                     |          |                   |                  |                                                                              |   |   |   |   |   |   |   |   |   |   |   |     |                    |   |   |       |                     |     |    |
|---------------------|----------|-------------------|------------------|------------------------------------------------------------------------------|---|---|---|---|---|---|---|---|---|---|---|-----|--------------------|---|---|-------|---------------------|-----|----|
| ≥ 2 unique peptides | rmAC2929 | Q5UY18_HALMA      | <i>gfo1</i>      | Glucose-fructose oxidoreductase                                              | 0 | 0 | 7 | 3 | 0 | 0 | 2 | 2 | 7 | 2 | 9 | 3.5 | 0.7 (>3X)          | 0 | 9 | 0.0   | Soluble only        | 327 | 0  |
| ≥ 2 unique peptides | rmAC2162 | Q5V0E7_HALMA      | <i>mgsA</i>      | Methylglyoxal synthase (EC 4.2.3.3)                                          | 0 | 0 | 6 | 3 | 0 | 0 | 3 | 3 | 6 | 3 | 9 | 2.0 | 0.7 (>3X)          | 0 | 9 | 0.0   | Soluble only        | 127 | 0  |
| ≥ 2 unique peptides | rmB0252  | Q5UWC7_HALMA      | <i>paalA</i>     | Phenylacetic acid degradation protein PaaA                                   | 0 | 0 | 6 | 2 | 0 | 0 | 3 | 3 | 6 | 3 | 9 | 2.0 | 0.7 (>3X)          | 0 | 9 | 0.0   | Soluble only        | 354 | 0  |
| ≥ 2 unique peptides | rmAC3239 | Q5UXR5_HALMA      | <i>ugd2</i>      | UDP-glucose 6-dehydrogenase (EC 1.1.1.22)                                    | 0 | 0 | 6 | 3 | 0 | 0 | 3 | 1 | 6 | 3 | 9 | 2.0 | 0.7 (>3X)          | 0 | 9 | 0.0   | Soluble only        | 435 | 0  |
| ≥ 2 unique peptides | rmB0254  | Q5UWC5_HALMA      | <i>ech6</i>      | Enoyl-CoA hydratase (EC 4.2.1.17)                                            | 0 | 0 | 6 | 2 | 0 | 0 | 3 | 2 | 6 | 3 | 9 | 2.0 | 0.7 (>3X)          | 0 | 9 | 0.0   | Soluble only        | 253 | 0  |
| ≥ 2 unique peptides | rmAC1936 | Q5V0Z7_HALMA      | <i>cobI</i>      | Cobalamin adenosyltransferase (EC 2.5.1.17)                                  | 1 | 1 | 4 | 2 | 0 | 0 | 4 | 2 | 5 | 4 | 9 | 1.3 | No dramatic change | 1 | 8 | 11.1  | Soluble predominant | 216 | 0  |
| ≥ 2 unique peptides | rmAC3243 | Q5UXR1_HALMA      | <i>galE7</i>     | UDP-glucose 4-epimerase                                                      | 0 | 0 | 4 | 3 | 0 | 0 | 5 | 4 | 4 | 5 | 9 | 0.8 | No dramatic change | 0 | 9 | 0.0   | Soluble only        | 331 | 0  |
| ≥ 2 unique peptides | rmAC2153 | Q5V0F6_HALMA      | <i>mutT2</i>     | Mut/nudix family protein                                                     | 0 | 0 | 4 | 2 | 0 | 0 | 5 | 2 | 4 | 5 | 9 | 0.8 | No dramatic change | 0 | 9 | 0.0   | Soluble only        | 180 | 0  |
| ≥ 2 unique peptides | rmAC1224 | PYRI_HALMARreview | <i>pyrI</i>      | Aspartate carbamoyltransferase regulatory chain                              | 0 | 0 | 3 | 3 | 0 | 0 | 6 | 4 | 3 | 6 | 9 | 0.5 | 1.2 (2-3X)         | 0 | 9 | 0.0   | Soluble only        | 155 | 0  |
| ≥ 2 unique peptides | rmAC2897 | Q5UYL1_HALMA      | <i>galE2</i>     | UDP-glucose 4-epimerase (EC 5.1.3.2)                                         | 0 | 0 | 3 | 3 | 0 | 0 | 6 | 4 | 3 | 6 | 9 | 0.5 | 1.2 (2-3X)         | 0 | 9 | 0.0   | Soluble only        | 334 | 0  |
| ≥ 2 unique peptides | rmAC0114 | Q5V5L3_HALMA      | <i>guaB5</i>     | Inosine-5'-monophosphate dehydrogenase related protein V                     | 0 | 0 | 2 | 1 | 0 | 0 | 7 | 5 | 2 | 7 | 9 | 0.3 | 1.2 (>3X)          | 0 | 9 | 0.0   | Soluble only        | 194 | 0  |
| ≥ 2 unique peptides | rmAC1515 | Q5V216_HALMA      | <i>pyrF</i>      | Orotidine 5'-phosphate decarboxylase (EC 4.1.1.23)                           | 0 | 0 | 2 | 2 | 0 | 0 | 7 | 4 | 2 | 7 | 9 | 0.3 | 1.2 (>3X)          | 0 | 9 | 0.0   | Soluble only        | 277 | 0  |
| ≥ 2 unique peptides | rmAC1084 | Q5V356_HALMA      | <i>acdG</i>      | Acyl-CoA dehydrogenase (EC 1.3.99.-)                                         | 0 | 0 | 2 | 2 | 0 | 0 | 7 | 4 | 2 | 7 | 9 | 0.3 | 1.2 (>3X)          | 0 | 9 | 0.0   | Soluble only        | 385 | 0  |
| ≥ 2 unique peptides | pNG7370  | Q5V5Z1_HALMA      | <i>gcvT1</i>     | Sacrosine dehydrogenase/glycine cleavage T-protein (EC 1.5.3.1)(EC 2.1.2.10) | 0 | 0 | 0 | 0 | 1 | 1 | 8 | 4 | 0 | 9 | 9 | 0.0 | 1.2 only           | 1 | 8 | 11.1  | Soluble predominant | 850 | 0  |
| ≥ 2 unique peptides | rmB0250  | Q5UWC8_HALMA      | <i>pacF</i>      | PacF protein                                                                 | 0 | 0 | 5 | 3 | 0 | 0 | 4 | 2 | 5 | 4 | 9 | 1.3 | No dramatic change | 0 | 9 | 0.0   | Soluble only        | 175 | 0  |
| ≥ 2 unique peptides | pNG7310  | Q5V647_HALMA      | <i>pNG7310</i>   | Possible photosystem reaction center subunit H                               | 0 | 0 | 5 | 3 | 0 | 0 | 4 | 3 | 5 | 4 | 9 | 1.3 | No dramatic change | 0 | 9 | 0.0   | Soluble only        | 92  | 0  |
| ≥ 2 unique peptides | rmB0212  | Q5UWF9_HALMA      | <i>pepB5</i>     | Aminopeptidase                                                               | 0 | 0 | 6 | 5 | 0 | 0 | 3 | 2 | 6 | 3 | 9 | 2.0 | 0.7 (>3X)          | 0 | 9 | 0.0   | Soluble only        | 422 | 0  |
| ≥ 2 unique peptides | rmAC0260 | RL21_HALMARreview | <i>rpL21e</i>    | 50S ribosomal protein L21e (HI31)                                            | 2 | 2 | 3 | 2 | 4 | 2 | 0 | 0 | 5 | 4 | 9 | 1.3 | No dramatic change | 6 | 3 | 66.7  | Memb + Sol          | 96  | 0  |
| ≥ 2 unique peptides | rmAC2759 | Q5UY11_HALMA      | <i>nso</i>       | Transporter sodium/sulfate symporter family                                  | 7 | 4 | 0 | 0 | 2 | 2 | 0 | 0 | 7 | 2 | 9 | 3.5 | 0.7 (>3X)          | 9 | 0 | 100.0 | Memb only           | 624 | 12 |
| ≥ 2 unique peptides | rmAC0829 | Q5V3U1_HALMA      | <i>livF-4</i>    | Branched-chain amino acid ABC transporter ATP-binding protein                | 4 | 1 | 1 | 1 | 4 | 2 | 0 | 0 | 5 | 4 | 9 | 1.3 | No dramatic change | 8 | 1 | 88.9  | Memb predominant    | 251 | 0  |
| ≥ 2 unique peptides | rmAC3265 | Q5UXP2_HALMA      | <i>pstB3</i>     | Phosphate ABC transporter ATP-binding protein                                | 4 | 3 | 0 | 0 | 5 | 2 | 0 | 0 | 4 | 5 | 9 | 0.8 | No dramatic change | 9 | 0 | 100.0 | Memb only           | 254 | 0  |
| ≥ 2 unique peptides | rmAC0647 | Q5V4A0_HALMA      | <i>abcS-1</i>    | ABC transporter substrate-binding protein                                    | 2 | 2 | 0 | 0 | 7 | 3 | 0 | 0 | 2 | 7 | 9 | 0.3 | 1.2 (>3X)          | 9 | 0 | 100.0 | Memb only           | 449 | 0  |
| ≥ 2 unique peptides | pNG7346  | Q5V612_HALMA      | <i>potD1</i>     | Spermidine/putrescine transporter substrate binding protein                  | 2 | 2 | 0 | 0 | 7 | 2 | 0 | 0 | 2 | 7 | 9 | 0.3 | 1.2 (>3X)          | 9 | 0 | 100.0 | Memb only           | 397 | 0  |
| ≥ 2 unique peptides | rmB0103  | Q5UWP8_HALMA      | <i>rbsB-3</i>    | Putative ABC transporter substrate binding protein                           | 0 | 0 | 0 | 0 | 9 | 6 | 0 | 0 | 0 | 9 | 9 | 0.0 | 1.2 only           | 9 | 0 | 100.0 | Memb only           | 444 | 0  |
| ≥ 2 unique peptides | rmB0312  | Q5UW76_HALMA      | <i>ugpA</i>      | ABC transporter permease protein                                             | 0 | 0 | 0 | 0 | 9 | 3 | 0 | 0 | 0 | 9 | 9 | 0.0 | 1.2 only           | 9 | 0 | 100.0 | Memb only           | 294 | 6  |
| ≥ 2 unique peptides | rmAC3310 | Q5UXK2_HALMA      | <i>rrmAC3310</i> | Transcription regulator                                                      | 0 | 0 | 6 | 2 | 0 | 0 | 2 | 1 | 6 | 2 | 8 | 3.0 | 0.7 (>3X)          | 0 | 8 | 0.0   | Soluble only        | 270 | 0  |
| ≥ 2 unique peptides | rmAC0842 | Q5V3S8_HALMA      | <i>cinR</i>      | Transcription repressor CinR                                                 | 0 | 0 | 5 | 4 | 0 | 0 | 3 | 2 | 5 | 3 | 8 | 1.7 | No dramatic change | 0 | 8 | 0.0   | Soluble only        | 116 | 0  |
| ≥ 2 unique peptides | rmAC1396 | RPOL_HALMARreview | <i>rpoL</i>      | DNA-directed RNA polymerase subunit L (EC 2.7.7.6)                           | 0 | 0 | 4 | 3 | 0 | 0 | 4 | 1 | 4 | 4 | 8 | 1.0 | No dramatic change | 0 | 8 | 0.0   | Soluble only        | 94  | 0  |
| ≥ 2 unique peptides | pNG7116  | Q5V6M5_HALMA      | <i>nthC</i>      | Endonuclease III (EC 4.2.99.18)                                              | 0 | 0 | 4 | 1 | 0 | 0 | 4 | 2 | 4 | 4 | 8 | 1.0 | No dramatic change | 0 | 8 | 0.0   | Soluble only        | 233 | 0  |
| ≥ 2 unique peptides | rmAC3094 | Q5UY46_HALMA      | <i>recJ5</i>     | RecJ-like exonuclease                                                        | 0 | 0 | 3 | 3 | 0 | 0 | 5 | 3 | 3 | 5 | 8 | 0.6 | No dramatic change | 0 | 8 | 0.0   | Soluble only        | 506 | 0  |
| ≥ 2 unique peptides | rmAC0107 | Q5V5M0_HALMA      | <i>rrmAC0107</i> | Glutaredoxin-like                                                            | 0 | 0 | 5 | 3 | 0 | 0 | 3 | 2 | 5 | 3 | 8 | 1.7 | No dramatic change | 0 | 8 | 0.0   | Soluble only        | 85  | 0  |
| ≥ 2 unique peptides | rmAC3254 | Q5UXQ2_HALMA      | <i>rrmAC3254</i> | Hypothetical protein                                                         | 6 | 3 | 0 | 0 | 2 | 2 | 0 | 0 | 6 | 2 | 8 | 3.0 | 0.7 (>3X)          | 8 | 0 | 100.0 | Memb only           | 727 | 0  |
| ≥ 2 unique peptides | rmAC3406 | Q5UXB6_HALMA      | <i>rrmAC3406</i> | Hypothetical protein                                                         | 0 | 0 | 6 | 3 | 0 | 0 | 2 | 2 | 6 | 2 | 8 | 3.0 | 0.7 (>3X)          | 0 | 8 | 0.0   | Soluble only        | 163 | 0  |
| ≥ 2 unique peptides | rmAC0802 | Q5V3W3_HALMA      | <i>rrmAC0802</i> | Hypothetical protein                                                         | 0 | 0 | 6 | 2 | 0 | 0 | 2 | 2 | 6 | 2 | 8 | 3.0 | 0.7 (>3X)          | 0 | 8 | 0.0   | Soluble only        | 176 | 0  |
| ≥ 2 unique peptides | rmAC2807 | Q5UYU0_HALMA      | <i>rrmAC2807</i> | Hypothetical protein                                                         | 1 | 1 | 4 | 2 | 1 | 1 | 2 | 2 | 5 | 3 | 8 | 1.7 | No dramatic change | 2 | 6 | 25.0  | Soluble predominant | 236 | 0  |
| ≥ 2 unique peptides | rmAC0115 | Q5V5L2_HALMA      | <i>rrmAC0115</i> | Hypothetical protein                                                         | 0 | 0 | 5 | 2 | 0 | 0 | 3 | 3 | 5 | 3 | 8 | 1.7 | No dramatic change | 0 | 8 | 0.0   | Soluble only        | 302 | 0  |
| ≥ 2 unique peptides | rmAC2744 | Q5UYZ5_HALMA      | <i>rrmAC2744</i> | Hypothetical protein                                                         | 0 | 0 | 5 | 2 | 0 | 0 | 3 | 1 | 5 | 3 | 8 | 1.7 | No dramatic change | 0 | 8 | 0.0   | Soluble only        | 314 | 0  |
| ≥ 2 unique peptides | rmAC2443 | Q5UZQ1_HALMA      | <i>rrmAC2443</i> | Hypothetical protein                                                         | 4 | 2 | 0 | 0 | 4 | 3 | 0 | 0 | 4 | 4 | 8 | 1.0 | No dramatic change | 8 | 0 | 100.0 | Memb only           | 324 | 1  |
| ≥ 2 unique peptides | rmAC1291 | Q5V2M4_HALMA      | <i>rrmAC1291</i> | Hypothetical protein                                                         | 0 | 0 | 4 | 3 | 0 | 0 | 4 | 3 | 4 | 4 | 8 | 1.0 | No dramatic change | 0 | 8 | 0.0   | Soluble only        | 161 | 0  |
| ≥ 2 unique peptides | pNG6121  | Q5V7C8_HALMA      | <i>pNG6121</i>   | Hypothetical protein                                                         | 0 | 0 | 4 | 3 | 0 | 0 | 4 | 2 | 4 | 4 | 8 | 1.0 | No dramatic change | 0 | 8 | 0.0   | Soluble only        | 445 | 0  |
| ≥ 2 unique peptides | rmAC0262 | Q5V583_HALMA      | <i>rrmAC0262</i> | Hypothetical protein                                                         | 0 | 0 | 3 | 1 | 0 | 0 | 5 | 2 | 3 | 5 | 8 | 0.6 | No dramatic change | 0 | 8 | 0.0   | Soluble only        | 59  | 0  |
| ≥ 2 unique peptides | rmAC2305 | Q5V024_HALMA      | <i>rrmAC2305</i> | Hypothetical protein                                                         | 0 | 0 | 3 | 2 | 0 | 0 | 5 | 1 | 3 | 5 | 8 | 0.6 | No dramatic change | 0 | 8 | 0.0   | Soluble only        | 257 | 0  |
| ≥ 2 unique peptides | pNG4008  | Q5V7S9_HALMA      | <i>pNG4008</i>   | Hypothetical protein                                                         | 0 | 0 | 2 | 2 | 0 | 0 | 6 | 4 | 2 | 6 | 8 | 0.3 | 1.2 (>3X)          | 0 | 8 | 0.0   | Soluble only        | 418 | 0  |
| ≥ 2 unique peptides | pNG7069  | Q5V6R5_HALMA      | <i>pNG7069</i>   | Hypothetical protein                                                         | 1 | 1 | 0 | 0 | 7 | 3 | 0 | 0 | 1 | 7 | 8 | 0.1 | 1.2 (>3X)          | 8 | 0 | 100.0 | Memb only           | 135 | 0  |
| ≥ 2 unique peptides | rmAC2886 | Q5UYM0_HALMA      | <i>phaC</i>      | Poly(3-hydroxyalkanoate) synthase                                            | 7 | 3 | 0 | 0 | 1 | 1 | 0 | 0 | 7 | 1 | 8 | 7.0 | 0.7 (>3X)          | 8 | 0 | 100.0 | Memb only           | 475 | 0  |
| ≥ 2 unique peptides | rmB0270  | Q5UWB2_HALMA      | <i>zntA2</i>     | Zinc-transporting ATPase                                                     | 6 | 3 | 0 | 0 | 2 | 1 | 0 | 0 | 6 | 2 | 8 | 3.0 | 0.7 (>3X)          | 8 | 0 | 100.0 | Memb only           | 806 | 5  |
| ≥ 2 unique peptides | rmAC2674 | Q5UZ53_HALMA      | <i>glcP</i>      | Glutamate carboxypeptidase (EC 3.4.17.11)                                    | 0 | 0 | 6 | 3 | 0 | 0 | 2 | 2 | 6 | 2 | 8 | 3.0 | 0.7 (>3X)          | 0 | 8 | 0.0   | Soluble only        | 353 | 0  |
| ≥ 2 unique peptides | rmAC1102 | COBB_HALMARreview | <i>cobB</i>      | Probable cobyrinic acid A,C-diamide synthase                                 | 2 | 2 | 3 | 3 | 1 | 1 | 2 | 2 | 5 | 3 | 8 | 1.7 | No dramatic change | 3 | 5 | 37.5  | Memb + Sol          | 439 | 0  |
| ≥ 2 unique peptides | rmAC0329 | Q5V523_HALMA      | <i>leuA2</i>     | 2-isopropylmalate synthase 2 (EC 2.3.3.13)                                   | 0 | 0 | 5 | 3 | 0 | 0 | 3 | 2 | 5 | 3 | 8 | 1.7 | No dramatic change | 0 | 8 | 0.0   | Soluble only        | 344 | 0  |
| ≥ 2 unique peptides | rmAC2180 | Q5V0D1_HALMA      | <i>gnd</i>       | 6-phosphogluconate dehydrogenase (EC 1.1.1.44)                               | 0 | 0 | 5 | 2 | 0 | 0 | 3 | 2 | 5 | 3 | 8 | 1.7 | No dramatic change | 0 | 8 | 0.0   | Soluble only        | 299 | 0  |
| ≥ 2 unique peptides | pNG7175  | Q5V6H1_HALMA      | <i>sojA</i>      | Putative plasmid partitioning protein Soj                                    | 0 | 0 | 4 | 3 | 1 | 1 | 3 | 2 | 4 | 4 | 8 | 1.0 | No dramatic change | 1 | 7 | 12.5  | Soluble predominant | 281 | 0  |
| ≥ 2 unique peptides | rmAC2363 | Q5UX2_HALMA       | <i>gapA</i>      | Glyceraldehyde 3-phosphate dehydrogenase (EC 1.2.1.59)                       | 0 | 0 | 4 | 2 | 0 | 0 | 4 | 4 | 4 | 4 | 8 | 1.0 | No dramatic change | 0 | 8 | 0.0   | Soluble only        | 334 | 0  |
| ≥ 2 unique peptides | rmAC1979 | Q5V0V8_HALMA      | <i>ech5</i>      | Enoyl-CoA hydratase/isomerase (EC 4.2.1.17)                                  | 0 | 0 | 4 | 3 | 0 | 0 | 4 | 3 | 4 | 4 | 8 | 1.0 | No dramatic change | 0 | 8 | 0.0   | Soluble only        | 196 | 0  |
| ≥ 2 unique peptides | pNG7165  | Q5V611_HALMA      | <i>hyuB</i>      | N-methylhydantoinase B (EC 3.5.2.9)                                          | 0 | 0 | 4 | 1 | 0 | 0 | 4 | 4 | 4 | 4 | 8 | 1.0 | No dramatic change | 0 | 8 | 0.0   | Soluble only        | 542 | 0  |
| ≥ 2 unique peptides | rmAC0878 | Q5V3P6_HALMA      | <i>panB</i>      | 3-methyl-2-oxobutanoate hydroxymethyltransferase (EC 2.1.2.11)               | 0 | 0 | 4 | 2 | 0 | 0 | 4 | 2 | 4 | 4 | 8 | 1.0 | No dramatic change | 0 | 8 | 0.0   | Soluble only        | 260 | 0  |
| ≥ 2 unique peptides | rmAC1459 | Q5V268_HALMA      | <i>rrmAC1459</i> | Metallo-beta-lactamase superfamily protein                                   | 0 | 0 | 3 | 2 | 0 | 0 | 5 | 3 | 3 | 5 | 8 | 0.6 | No dramatic change | 0 | 8 | 0.0   | Soluble only        | 315 | 0  |



|                     |          |                    |                  |                                                                                         |   |   |   |   |   |   |   |   |   |   |   |     |                    |   |   |       |                     |      |   |
|---------------------|----------|--------------------|------------------|-----------------------------------------------------------------------------------------|---|---|---|---|---|---|---|---|---|---|---|-----|--------------------|---|---|-------|---------------------|------|---|
| ≥ 2 unique peptides | rmAC1877 | Q5V145_HALMA       | <i>aroD</i>      | 3-dehydroquinate dehydratase (EC 4.2.1.10)                                              | 0 | 0 | 3 | 2 | 0 | 0 | 5 | 1 | 3 | 5 | 8 | 0.6 | No dramatic change | 0 | 8 | 0.0   | Soluble only        | 229  | 0 |
| ≥ 2 unique peptides | rmAC0982 | Q5V3F2_HALMA       | <i>ssuE1</i>     | NADPH-dependent FMN reductase (EC 1.5.1.29)                                             | 0 | 0 | 2 | 2 | 0 | 0 | 6 | 3 | 2 | 6 | 8 | 0.3 | 1.2 (>3X)          | 0 | 8 | 0.0   | Soluble only        | 192  | 0 |
| ≥ 2 unique peptides | rmAC3523 | APT_HALMARReview   | <i>apt</i>       | Adenine phosphoribosyltransferase (EC 2.4.2.7) (APRT)                                   | 0 | 0 | 2 | 1 | 0 | 0 | 6 | 3 | 2 | 6 | 8 | 0.3 | 1.2 (>3X)          | 0 | 8 | 0.0   | Soluble only        | 189  | 0 |
| ≥ 2 unique peptides | rmAC3034 | Q5UY95_HALMA       | <i>gfo6</i>      | Xylose dehydrogenase                                                                    | 0 | 0 | 0 | 0 | 0 | 0 | 8 | 5 | 0 | 8 | 8 | 0.0 | 1.2 only           | 0 | 8 | 0.0   | Soluble only        | 360  | 0 |
| ≥ 2 unique peptides | pNG7302  | Q5V654_HALMA       | <i>ppk</i>       | Polyphosphate kinase (EC 2.7.4.1)                                                       | 0 | 0 | 0 | 0 | 0 | 0 | 8 | 5 | 0 | 8 | 8 | 0.0 | 1.2 only           | 0 | 8 | 0.0   | Soluble only        | 818  | 0 |
| ≥ 2 unique peptides | rmAC3421 | Q5UXA2_HALMA       | <i>map</i>       | Methionine aminopeptidase (EC 3.4.11.18)                                                | 0 | 0 | 4 | 2 | 0 | 0 | 4 | 3 | 4 | 4 | 8 | 1.0 | No dramatic change | 0 | 8 | 0.0   | Soluble only        | 298  | 0 |
| ≥ 2 unique peptides | rmAC2809 | Q5UYT8_HALMA       | <i>usp21</i>     | Universal stress protein                                                                | 0 | 0 | 3 | 1 | 0 | 0 | 5 | 2 | 3 | 5 | 8 | 0.6 | No dramatic change | 0 | 8 | 0.0   | Soluble only        | 147  | 0 |
| ≥ 2 unique peptides | pNG7142  | Q5V6K0_HALMA       | <i>usp31</i>     | Universal stress protein                                                                | 0 | 0 | 0 | 0 | 0 | 0 | 8 | 5 | 0 | 8 | 8 | 0.0 | 1.2 only           | 0 | 8 | 0.0   | Soluble only        | 140  | 0 |
| ≥ 2 unique peptides | rmAC0377 | Q5V4Y2_HALMA       | <i>ycfA-1</i>    | Amino acid ABC transporter permease protein                                             | 6 | 4 | 0 | 0 | 2 | 2 | 0 | 0 | 6 | 2 | 8 | 3.0 | 0.7 (>3X)          | 8 | 0 | 100.0 | Memb only           | 325  | 6 |
| ≥ 2 unique peptides | rmAC0041 | Q5V5S9_HALMA       | <i>srp19</i>     | Signal recognition particle 19 kDa protein                                              | 0 | 0 | 5 | 2 | 0 | 0 | 3 | 2 | 5 | 3 | 8 | 1.7 | No dramatic change | 0 | 8 | 0.0   | Soluble only        | 112  | 0 |
| ≥ 2 unique peptides | rmAC3266 | Q5UXP1_HALMA       | <i>modB</i>      | Molybdenum ABC transporter permease protein                                             | 4 | 3 | 0 | 0 | 4 | 2 | 0 | 0 | 4 | 4 | 8 | 1.0 | No dramatic change | 8 | 0 | 100.0 | Memb only           | 228  | 4 |
| ≥ 2 unique peptides | rmAC0031 | Q5V5T8_HALMA       | <i>ugpC3</i>     | Sugar ABC transporter ATP-binding protein (UGPC)                                        | 4 | 3 | 0 | 0 | 2 | 2 | 2 | 1 | 4 | 4 | 8 | 1.0 | No dramatic change | 6 | 2 | 75.0  | Memb predominant    | 379  | 0 |
| ≥ 2 unique peptides | rmAC0920 | Q5V3K8_HALMA       | <i>msmX-2</i>    | Sugar ABC transporter ATP-binding protein                                               | 3 | 3 | 0 | 0 | 5 | 4 | 0 | 0 | 3 | 5 | 8 | 0.6 | No dramatic change | 8 | 0 | 100.0 | Memb only           | 398  | 0 |
| ≥ 2 unique peptides | rmAC1533 | Q5V1Z9_HALMA       | <i>phoU2</i>     | Phosphate transport system regulatory protein PhoU                                      | 1 | 1 | 2 | 1 | 0 | 0 | 5 | 2 | 3 | 5 | 8 | 0.6 | No dramatic change | 1 | 7 | 12.5  | Soluble predominant | 235  | 0 |
| ≥ 2 unique peptides | rmAC2034 | Q5V0R2_HALMA       | <i>htrA</i>      | HTR-like protein                                                                        | 5 | 2 | 0 | 0 | 2 | 1 | 0 | 0 | 5 | 2 | 7 | 2.5 | 0.7 (2-3X)         | 7 | 0 | 100.0 | Memb only           | 394  | 8 |
| ≥ 2 unique peptides | rmAC1792 | Q5V1B9_HALMA       | <i>ruvB</i>      | Holliday junction DNA helicase                                                          | 4 | 3 | 1 | 1 | 0 | 0 | 2 | 2 | 5 | 2 | 7 | 2.5 | 0.7 (2-3X)         | 4 | 3 | 57.1  | Memb + Sol          | 850  | 0 |
| ≥ 2 unique peptides | pNG6185  | Q5V7B8_HALMA       | <i>pNG6185</i>   | Putative DEAD/H helicase                                                                | 1 | 1 | 3 | 3 | 0 | 0 | 3 | 2 | 4 | 3 | 7 | 1.3 | No dramatic change | 1 | 6 | 14.3  | Soluble predominant | 1212 | 0 |
| ≥ 2 unique peptides | rmAC0487 | Q5V4P0_HALMA       | <i>hilD</i>      | Sensor protein (EC 2.7.13.3)                                                            | 0 | 0 | 4 | 3 | 0 | 0 | 3 | 2 | 4 | 3 | 7 | 1.3 | No dramatic change | 0 | 7 | 0.0   | Soluble only        | 461  | 0 |
| ≥ 2 unique peptides | rmAC2861 | Q5UYP2_HALMA       | <i>mutS2</i>     | Mismatch repair protein                                                                 | 0 | 0 | 2 | 2 | 0 | 0 | 5 | 5 | 2 | 5 | 7 | 0.4 | 1.2 (2-3X)         | 0 | 7 | 0.0   | Soluble only        | 692  | 0 |
| ≥ 2 unique peptides | rmAC0459 | TOP6A_HALMARReview | <i>top6A</i>     | Type II DNA topoisomerase VI subunit A (EC 5.99.1.3)                                    | 0 | 0 | 2 | 2 | 0 | 0 | 5 | 4 | 2 | 5 | 7 | 0.4 | 1.2 (2-3X)         | 0 | 7 | 0.0   | Soluble only        | 368  | 0 |
| ≥ 2 unique peptides | pNG7223  | Q5V6C6_HALMA       | <i>boa</i>       | Bacterio-opsin activator-like protein                                                   | 0 | 0 | 1 | 1 | 0 | 0 | 6 | 2 | 1 | 6 | 7 | 0.2 | 1.2 (>3X)          | 0 | 7 | 0.0   | Soluble only        | 1054 | 0 |
| ≥ 2 unique peptides | rmAC1105 | Q5V339_HALMA       | <i>rrmAC1105</i> | Hypothetical protein                                                                    | 6 | 3 | 0 | 0 | 1 | 1 | 0 | 0 | 6 | 1 | 7 | 6.0 | 0.7 (>3X)          | 7 | 0 | 100.0 | Memb only           | 264  | 5 |
| ≥ 2 unique peptides | rmAC3543 | Q5UWZ4_HALMA       | <i>rrmAC3543</i> | Hypothetical protein                                                                    | 5 | 3 | 0 | 0 | 2 | 2 | 0 | 0 | 5 | 2 | 7 | 2.5 | 0.7 (2-3X)         | 7 | 0 | 100.0 | Memb only           | 153  | 0 |
| ≥ 2 unique peptides | rmAC2523 | Q5UZH7_HALMA       | <i>rrmAC2523</i> | Hypothetical protein                                                                    | 0 | 0 | 5 | 3 | 0 | 0 | 2 | 1 | 5 | 2 | 7 | 2.5 | 0.7 (2-3X)         | 0 | 7 | 0.0   | Soluble only        | 383  | 0 |
| ≥ 2 unique peptides | rmAC3437 | Q5UX87_HALMA       | <i>rrmAC3437</i> | Hypothetical protein                                                                    | 4 | 4 | 0 | 0 | 3 | 2 | 0 | 0 | 4 | 3 | 7 | 1.3 | No dramatic change | 7 | 0 | 100.0 | Memb only           | 426  | 2 |
| ≥ 2 unique peptides | rmAC2046 | Q5V0Q0_HALMA       | <i>rrmAC2046</i> | Hypothetical protein                                                                    | 4 | 3 | 0 | 0 | 3 | 2 | 0 | 0 | 4 | 3 | 7 | 1.3 | No dramatic change | 7 | 0 | 100.0 | Memb only           | 347  | 1 |
| ≥ 2 unique peptides | rmAC3463 | Q5UX64_HALMA       | <i>rrmAC3463</i> | Hypothetical protein                                                                    | 4 | 2 | 0 | 0 | 3 | 2 | 0 | 0 | 4 | 3 | 7 | 1.3 | No dramatic change | 7 | 0 | 100.0 | Memb only           | 346  | 3 |
| ≥ 2 unique peptides | rmAC1731 | Q5V1G8_HALMA       | <i>rrmAC1731</i> | Hypothetical protein                                                                    | 4 | 2 | 0 | 0 | 3 | 2 | 0 | 0 | 4 | 3 | 7 | 1.3 | No dramatic change | 7 | 0 | 100.0 | Memb only           | 256  | 6 |
| ≥ 2 unique peptides | rmAC0305 | Q5V542_HALMA       | <i>rrmAC0305</i> | Hypothetical protein                                                                    | 4 | 2 | 0 | 0 | 3 | 2 | 0 | 0 | 4 | 3 | 7 | 1.3 | No dramatic change | 7 | 0 | 100.0 | Memb only           | 336  | 7 |
| ≥ 2 unique peptides | rmAC3206 | Q5UXU3_HALMA       | <i>rrmAC3206</i> | Hypothetical protein                                                                    | 0 | 0 | 4 | 3 | 0 | 0 | 3 | 3 | 4 | 3 | 7 | 1.3 | No dramatic change | 0 | 7 | 0.0   | Soluble only        | 152  | 0 |
| ≥ 2 unique peptides | rmAC2249 | Q5V073_HALMA       | <i>rrmAC2249</i> | Hypothetical protein                                                                    | 0 | 0 | 4 | 3 | 0 | 0 | 3 | 3 | 4 | 3 | 7 | 1.3 | No dramatic change | 0 | 7 | 0.0   | Soluble only        | 205  | 0 |
| ≥ 2 unique peptides | rmAC2514 | Q5UZ16_HALMA       | <i>rrmAC2514</i> | Hypothetical protein                                                                    | 0 | 0 | 4 | 2 | 0 | 0 | 3 | 3 | 4 | 3 | 7 | 1.3 | No dramatic change | 0 | 7 | 0.0   | Soluble only        | 318  | 0 |
| ≥ 2 unique peptides | rmAC2112 | Q5V0J0_HALMA       | <i>rrmAC2112</i> | Hypothetical protein                                                                    | 0 | 0 | 4 | 2 | 0 | 0 | 3 | 1 | 4 | 3 | 7 | 1.3 | No dramatic change | 0 | 7 | 0.0   | Soluble only        | 124  | 0 |
| ≥ 2 unique peptides | rmAC3435 | Q5UX89_HALMA       | <i>rrmAC3435</i> | Hypothetical protein                                                                    | 3 | 2 | 0 | 0 | 4 | 3 | 0 | 0 | 3 | 4 | 7 | 0.8 | No dramatic change | 7 | 0 | 100.0 | Memb only           | 504  | 4 |
| ≥ 2 unique peptides | rmAC0629 | Q5V4B5_HALMA       | <i>rrmAC0629</i> | Hypothetical protein                                                                    | 0 | 0 | 3 | 2 | 0 | 0 | 4 | 3 | 3 | 4 | 7 | 0.8 | No dramatic change | 0 | 7 | 0.0   | Soluble only        | 257  | 0 |
| ≥ 2 unique peptides | rmAC1968 | Q5V0W7_HALMA       | <i>rrmAC1968</i> | Hypothetical protein                                                                    | 0 | 0 | 2 | 1 | 0 | 0 | 5 | 4 | 2 | 5 | 7 | 0.4 | 1.2 (2-3X)         | 0 | 7 | 0.0   | Soluble only        | 432  | 0 |
| ≥ 2 unique peptides | pNG2029  | Q5V830_HALMA       | <i>pNG2029</i>   | Hypothetical protein                                                                    | 0 | 0 | 2 | 1 | 0 | 0 | 5 | 3 | 2 | 5 | 7 | 0.4 | 1.2 (2-3X)         | 0 | 7 | 0.0   | Soluble only        | 129  | 0 |
| ≥ 2 unique peptides | rmAC1682 | Q5V1L1_HALMA       | <i>rrmAC1682</i> | Hypothetical protein                                                                    | 1 | 1 | 0 | 0 | 6 | 2 | 0 | 0 | 1 | 6 | 7 | 0.2 | 1.2 (>3X)          | 7 | 0 | 100.0 | Memb only           | 110  | 2 |
| ≥ 2 unique peptides | rmAC1254 | Q5V2Q6_HALMA       | <i>rrmAC1254</i> | Hypothetical protein                                                                    | 0 | 0 | 1 | 1 | 0 | 0 | 6 | 4 | 1 | 6 | 7 | 0.2 | 1.2 (>3X)          | 0 | 7 | 0.0   | Soluble only        | 196  | 0 |
| ≥ 2 unique peptides | rmAC3001 | Q5UYC4_HALMA       | <i>cbiF</i>      | Cobalamin biosynthesis precorrin-3 methylase                                            | 0 | 0 | 7 | 3 | 0 | 0 | 0 | 0 | 7 | 0 | 7 | ∞   | 0.7 only           | 0 | 7 | 0.0   | Soluble only        | 292  | 0 |
| ≥ 2 unique peptides | rmB0214  | Q5UWF8_HALMA       | <i>rrmB0214</i>  | Bacterial luciferase family monooxygenase                                               | 0 | 0 | 5 | 4 | 0 | 0 | 2 | 2 | 5 | 2 | 7 | 2.5 | 0.7 (2-3X)         | 0 | 7 | 0.0   | Soluble only        | 334  | 0 |
| ≥ 2 unique peptides | pNG7284  | Q5V671_HALMA       | <i>glcD3</i>     | Putative oxidoreductase                                                                 | 4 | 4 | 0 | 0 | 3 | 2 | 0 | 0 | 4 | 3 | 7 | 1.3 | No dramatic change | 7 | 0 | 100.0 | Memb only           | 1014 | 0 |
| ≥ 2 unique peptides | rmAC2178 | Q5V0D3_HALMA       | <i>rfbB3</i>     | DTDP-glucose-46-dehydratase (EC 4.2.1.46)                                               | 4 | 2 | 0 | 0 | 3 | 2 | 0 | 0 | 4 | 3 | 7 | 1.3 | No dramatic change | 7 | 0 | 100.0 | Memb only           | 294  | 0 |
| ≥ 2 unique peptides | rmAC1368 | Q5V2F5_HALMA       | <i>trp-6</i>     | ABC transporter ATP-binding protein                                                     | 4 | 2 | 0 | 0 | 3 | 2 | 0 | 0 | 4 | 3 | 7 | 1.3 | No dramatic change | 7 | 0 | 100.0 | Memb only           | 232  | 0 |
| ≥ 2 unique peptides | rmAC1961 | Q5V0X4_HALMA       | <i>cga-1</i>     | Glucoamylase                                                                            | 0 | 0 | 4 | 4 | 0 | 0 | 3 | 2 | 4 | 3 | 7 | 1.3 | No dramatic change | 0 | 7 | 0.0   | Soluble only        | 1513 | 0 |
| ≥ 2 unique peptides | rmAC0709 | TRPE1_HALMARReview | <i>trpE1</i>     | Anthranilate synthase component 1 I (EC 4.1.3.27) (Anthranilate synthase component 1 I) | 0 | 0 | 4 | 4 | 0 | 0 | 3 | 2 | 4 | 3 | 7 | 1.3 | No dramatic change | 0 | 7 | 0.0   | Soluble only        | 489  | 0 |
| ≥ 2 unique peptides | rmAC3174 | Q5UXX3_HALMA       | <i>pyrH</i>      | Probable uridylate kinase (EC 2.7.4.-)                                                  | 0 | 0 | 4 | 2 | 0 | 0 | 3 | 2 | 4 | 3 | 7 | 1.3 | No dramatic change | 0 | 7 | 0.0   | Soluble only        | 228  | 0 |
| ≥ 2 unique peptides | pNG7288  | Q5V667_HALMA       | <i>pNG7288</i>   | Putative phosphoesterase                                                                | 3 | 3 | 0 | 0 | 4 | 2 | 0 | 0 | 3 | 4 | 7 | 0.8 | No dramatic change | 7 | 0 | 100.0 | Memb only           | 448  | 2 |
| ≥ 2 unique peptides | rmAC2280 | Q5V048_HALMA       | <i>cbiQ1</i>     | Cobalt transport protein                                                                | 3 | 2 | 0 | 0 | 4 | 2 | 0 | 0 | 3 | 4 | 7 | 0.8 | No dramatic change | 7 | 0 | 100.0 | Memb only           | 263  | 5 |
| ≥ 2 unique peptides | rmAC1011 | Q5V3C6_HALMA       | <i>rfjG</i>      | DTDP-glucose dehydratase (EC 4.2.1.46)                                                  | 1 | 1 | 2 | 2 | 0 | 0 | 4 | 3 | 3 | 4 | 7 | 0.8 | No dramatic change | 1 | 6 | 14.3  | Soluble predominant | 333  | 0 |
| ≥ 2 unique peptides | rmAC2056 | Q5V0P1_HALMA       | <i>serA3</i>     | D-3-phosphoglycerate dehydrogenase (EC 1.1.1.95)                                        | 0 | 0 | 3 | 2 | 0 | 0 | 4 | 4 | 3 | 4 | 7 | 0.8 | No dramatic change | 0 | 7 | 0.0   | Soluble only        | 320  | 0 |
| ≥ 2 unique peptides | rmAC1355 | GATA_HALMARReview  | <i>gatA</i>      | Glutamyl-tRNA(Gln) amidotransferase subunit A (EC 6.3.5.-) (Glu-ADTsubunit A)           | 0 | 0 | 3 | 3 | 0 | 0 | 4 | 3 | 3 | 4 | 7 | 0.8 | No dramatic change | 0 | 7 | 0.0   | Soluble only        | 425  | 0 |
| ≥ 2 unique peptides | rmB0198  | Q5UWH1_HALMA       | <i>pdhC1</i>     | Dihydrolipoamide S-acetyltransferase component of pyruvate dehydrogenase complex E2     | 0 | 0 | 3 | 3 | 0 | 0 | 4 | 3 | 3 | 4 | 7 | 0.8 | No dramatic change | 0 | 7 | 0.0   | Soluble only        | 540  | 0 |
| ≥ 2 unique peptides | rmAC0336 | Q5V517_HALMA       | <i>leuD</i>      | 3-isopropylmalate dehydratase small subunit (EC 4.2.1.33)                               | 0 | 0 | 3 | 2 | 0 | 0 | 4 | 2 | 3 | 4 | 7 | 0.8 | No dramatic change | 0 | 7 | 0.0   | Soluble only        | 214  | 0 |
| ≥ 2 unique peptides | rmAC1498 | Q5V232_HALMA       | <i>gcvP1</i>     | Glycine dehydrogenase subunit 1 (EC 1.4.4.2)                                            | 0 | 0 | 2 | 1 | 0 | 0 | 5 | 4 | 2 | 5 | 7 | 0.4 | 1.2 (2-3X)         | 0 | 7 | 0.0   | Soluble only        | 447  | 0 |

|                     |          |                   |                  |                                                                                  |   |   |   |   |   |   |   |   |   |   |   |     |                    |   |   |       |                  |      |    |
|---------------------|----------|-------------------|------------------|----------------------------------------------------------------------------------|---|---|---|---|---|---|---|---|---|---|---|-----|--------------------|---|---|-------|------------------|------|----|
| ≥ 2 unique peptides | rmAC3275 | Q5UXN3_HALMA      | <i>purC</i>      | Phosphoribosylaminoimidazole-succinocarboxamide synthase (EC 6.3.2.6)            | 0 | 0 | 2 | 1 | 0 | 0 | 5 | 3 | 2 | 5 | 7 | 0.4 | 1.2 (2-3X)         | 0 | 7 | 0.0   | Soluble only     | 344  | 0  |
| ≥ 2 unique peptides | rmAC1999 | Q5V0U1_HALMA      | <i>spaT</i>      | Aminotransferase class V                                                         | 0 | 0 | 2 | 1 | 0 | 0 | 5 | 2 | 2 | 5 | 7 | 0.4 | 1.2 (2-3X)         | 0 | 7 | 0.0   | Soluble only     | 402  | 0  |
| ≥ 2 unique peptides | rmB0237  | Q5UWE0_HALMA      | <i>ech4</i>      | Enoyl-CoA hydratase (EC 4.2.1.17)                                                | 0 | 0 | 1 | 1 | 0 | 0 | 6 | 3 | 1 | 6 | 7 | 0.2 | 1.2 (>3X)          | 0 | 7 | 0.0   | Soluble only     | 270  | 0  |
| ≥ 2 unique peptides | rmAC1129 | Q5V318_HALMA      | <i>trxB3</i>     | Thioredoxin reductase (EC 1.8.1.9)                                               | 0 | 0 | 1 | 1 | 0 | 0 | 6 | 3 | 1 | 6 | 7 | 0.2 | 1.2 (>3X)          | 0 | 7 | 0.0   | Soluble only     | 349  | 0  |
| ≥ 2 unique peptides | rmAC1794 | Q5V1B7_HALMA      | <i>dapF</i>      | Diaminopimelate epimerase (EC 5.1.1.7)                                           | 0 | 0 | 1 | 1 | 0 | 0 | 6 | 2 | 1 | 6 | 7 | 0.2 | 1.2 (>3X)          | 0 | 7 | 0.0   | Soluble only     | 303  | 0  |
| ≥ 2 unique peptides | rmAC3442 | Q5UX82_HALMA      | <i>asbA</i>      | L-asparaginase (EC 3.5.1.1)                                                      | 0 | 0 | 0 | 0 | 0 | 0 | 7 | 3 | 0 | 7 | 7 | 0.0 | 1.2 only           | 0 | 7 | 0.0   | Soluble only     | 415  | 0  |
| ≥ 2 unique peptides | rmAC2412 | Q5UZS8_HALMA      | <i>rrmAC2412</i> | Putative peptidase                                                               | 4 | 2 | 0 | 0 | 3 | 2 | 0 | 0 | 4 | 3 | 7 | 1.3 | No dramatic change | 7 | 0 | 100.0 | Memb only        | 238  | 4  |
| ≥ 2 unique peptides | rmAC0514 | SURE_HALMAReview  | <i>surE</i>      | 5'-nucleotidase surE (EC 3.1.3.5) (Nucleoside 5'-monophosphatophosphohydrolase)  | 0 | 0 | 3 | 3 | 0 | 0 | 4 | 2 | 3 | 4 | 7 | 0.8 | No dramatic change | 0 | 7 | 0.0   | Soluble only     | 269  | 0  |
| ≥ 2 unique peptides | rmAC1594 | RL19_HALMAReview  | <i>rpl19e</i>    | 50S ribosomal protein L19e (Hmal19) (HI24)                                       | 0 | 0 | 2 | 1 | 5 | 5 | 0 | 0 | 2 | 5 | 7 | 0.4 | 1.2 (2-3X)         | 5 | 2 | 71.4  | Memb + Sol       | 149  | 0  |
| ≥ 2 unique peptides | pNG7084  | Q5V6Q3_HALMA      | <i>htr8</i>      | MCP domain signal transducer                                                     | 3 | 3 | 0 | 0 | 4 | 3 | 0 | 0 | 3 | 4 | 7 | 0.8 | No dramatic change | 7 | 0 | 100.0 | Memb only        | 637  | 5  |
| ≥ 2 unique peptides | rmAC1619 | Q5V1R8_HALMA      | <i>gtp2</i>      | GTP-binding protein-like                                                         | 0 | 0 | 2 | 2 | 0 | 0 | 5 | 2 | 2 | 5 | 7 | 0.4 | 1.2 (2-3X)         | 0 | 7 | 0.0   | Soluble only     | 543  | 0  |
| ≥ 2 unique peptides | pNG7083  | Q5V6Q4_HALMA      | <i>usp23</i>     | Putative universal stress protein family                                         | 0 | 0 | 4 | 2 | 0 | 0 | 3 | 2 | 4 | 3 | 7 | 1.3 | No dramatic change | 0 | 7 | 0.0   | Soluble only     | 144  | 0  |
| ≥ 2 unique peptides | rmB0204  | Q5UW66_HALMA      | <i>livM-7</i>    | High-affinity branched-chain amino acid transport protein                        | 5 | 3 | 0 | 0 | 2 | 1 | 0 | 0 | 5 | 2 | 7 | 2.5 | 0.7 (2>3X)         | 7 | 0 | 100.0 | Memb only        | 435  | 8  |
| ≥ 2 unique peptides | rmAC0944 | Q5V316_HALMA      | <i>rrmAC0944</i> | Putative sugar transporter                                                       | 5 | 2 | 0 | 0 | 2 | 1 | 0 | 0 | 5 | 2 | 7 | 2.5 | 0.7 (2>3X)         | 7 | 0 | 100.0 | Memb only        | 449  | 10 |
| ≥ 2 unique peptides | rmAC2468 | Q5UZM9_HALMA      | <i>livH-6</i>    | Branched chain amino acid transporter permease protein                           | 3 | 1 | 0 | 0 | 4 | 2 | 0 | 0 | 3 | 4 | 7 | 0.8 | No dramatic change | 7 | 0 | 100.0 | Memb only        | 305  | 8  |
| ≥ 2 unique peptides | rmAC0243 | Q5V5A2_HALMA      | <i>trkA7</i>     | TRK potassium uptake system protein                                              | 0 | 0 | 2 | 2 | 0 | 0 | 5 | 3 | 2 | 5 | 7 | 0.4 | 1.2 (2-3X)         | 0 | 7 | 0.0   | Soluble only     | 217  | 0  |
| ≥ 2 unique peptides | rmAC2039 | Q5V0Q7_HALMA      | <i>oppA</i>      | Oligopeptide ABC transporter solute-binding protein                              | 1 | 1 | 0 | 0 | 6 | 3 | 0 | 0 | 1 | 6 | 7 | 0.2 | 1.2 (>3X)          | 7 | 0 | 100.0 | Memb only        | 649  | 0  |
| ≥ 2 unique peptides | rmAC0077 | Q5V5P6_HALMA      | <i>mkv</i>       | Mevalonate kinase (EC 2.7.1.36)                                                  | 0 | 0 | 3 | 2 | 0 | 0 | 4 | 3 | 3 | 4 | 7 | 0.8 | No dramatic change | 0 | 7 | 0.0   | Soluble only     | 327  | 0  |
| ≥ 2 unique peptides | rmB0325  | Q5UW64_HALMA      | <i>ftsZ2</i>     | Cell division protein                                                            | 5 | 4 | 1 | 1 | 0 | 0 | 0 | 0 | 6 | 0 | 6 | ∞   | 0.7 only           | 5 | 1 | 83.3  | Memb predominant | 425  | 0  |
| ≥ 2 unique peptides | rmAC2205 | Q5V0B2_HALMA      | <i>cheA3</i>     | Chemotaxis protein CheA (EC 2.7.3.-)                                             | 0 | 0 | 4 | 3 | 0 | 0 | 2 | 2 | 4 | 2 | 6 | 2.0 | 0.7 (2>3X)         | 0 | 6 | 0.0   | Soluble only     | 662  | 0  |
| ≥ 2 unique peptides | rmAC1397 | Q5V2C6_HALMA      | <i>rrmAC1397</i> | Putative DNA binding                                                             | 5 | 2 | 0 | 0 | 1 | 1 | 0 | 0 | 5 | 1 | 6 | 5.0 | 0.7 (>3X)          | 6 | 0 | 100.0 | Memb only        | 103  | 1  |
| ≥ 2 unique peptides | pNG6174  | CDC6B_HALMAReview | <i>cdc6-11</i>   | Cell division control protein 6 homolog 11 (CDC6 homolog 11)                     | 0 | 0 | 5 | 2 | 0 | 0 | 1 | 1 | 5 | 1 | 6 | 5.0 | 0.7 (>3X)          | 0 | 6 | 0.0   | Soluble only     | 422  | 0  |
| ≥ 2 unique peptides | rmAC1144 | Q5V306_HALMA      | <i>mutS3</i>     | DNA mismatch repair protein                                                      | 0 | 0 | 5 | 2 | 0 | 0 | 1 | 1 | 5 | 1 | 6 | 5.0 | 0.7 (>3X)          | 0 | 6 | 0.0   | Soluble only     | 585  | 0  |
| ≥ 2 unique peptides | rmAC2217 | Q5V0A2_HALMA      | <i>recJ4</i>     | RecJ-like exonuclease                                                            | 0 | 0 | 4 | 3 | 0 | 0 | 2 | 2 | 4 | 2 | 6 | 2.0 | 0.7 (2>3X)         | 0 | 6 | 0.0   | Soluble only     | 363  | 0  |
| ≥ 2 unique peptides | rmAC1645 | Q5V1P3_HALMA      | <i>topA</i>      | DNA topoisomerase I (EC 5.99.1.2)                                                | 0 | 0 | 4 | 3 | 0 | 0 | 2 | 2 | 4 | 2 | 6 | 2.0 | 0.7 (2>3X)         | 0 | 6 | 0.0   | Soluble only     | 1364 | 0  |
| ≥ 2 unique peptides | rmAC2847 | Q5UYQ5_HALMA      | <i>hjr</i>       | Holliday junction resolvase                                                      | 0 | 0 | 4 | 2 | 0 | 0 | 2 | 1 | 4 | 2 | 6 | 2.0 | 0.7 (2>3X)         | 0 | 6 | 0.0   | Soluble only     | 172  | 0  |
| ≥ 2 unique peptides | pNG6143  | Q5V782_HALMA      | <i>mrr</i>       | Mrr restriction system protein-like                                              | 3 | 2 | 0 | 0 | 3 | 2 | 0 | 0 | 3 | 3 | 6 | 1.0 | No dramatic change | 6 | 0 | 100.0 | Memb only        | 454  | 1  |
| ≥ 2 unique peptides | rmAC2044 | Q5V0Q2_HALMA      | <i>hilD</i>      | Sensor protein (EC 2.7.13.3)                                                     | 0 | 0 | 3 | 3 | 0 | 0 | 3 | 3 | 3 | 3 | 6 | 1.0 | No dramatic change | 0 | 6 | 0.0   | Soluble only     | 782  | 0  |
| ≥ 2 unique peptides | rmAC1311 | Q5V2K6_HALMA      | <i>recJ1</i>     | RecJ exonuclease                                                                 | 0 | 0 | 3 | 3 | 0 | 0 | 3 | 2 | 3 | 3 | 6 | 1.0 | No dramatic change | 0 | 6 | 0.0   | Soluble only     | 337  | 0  |
| ≥ 2 unique peptides | rmAC3365 | Q5UXF0_HALMA      | <i>trh3</i>      | Transcription regulator                                                          | 0 | 0 | 3 | 2 | 0 | 0 | 3 | 2 | 3 | 3 | 6 | 1.0 | No dramatic change | 0 | 6 | 0.0   | Soluble only     | 137  | 0  |
| ≥ 2 unique peptides | pNG1040  | Q5V893_HALMA      | <i>pNG1040</i>   | Putative helicase                                                                | 0 | 0 | 2 | 2 | 0 | 0 | 4 | 2 | 2 | 4 | 6 | 0.5 | 1.2 (2-3X)         | 0 | 6 | 0.0   | Soluble only     | 862  | 0  |
| ≥ 2 unique peptides | rmAC1996 | Q5V0U4_HALMA      | <i>rrmAC1996</i> | Putative DNA binding domain                                                      | 0 | 0 | 0 | 0 | 0 | 0 | 6 | 3 | 0 | 6 | 6 | 0.0 | 1.2 only           | 0 | 6 | 0.0   | Soluble only     | 216  | 0  |
| ≥ 2 unique peptides | rmAC0656 | Q5V492_HALMA      | <i>ferA3</i>     | Ferredoxin                                                                       | 0 | 0 | 0 | 0 | 5 | 2 | 1 | 1 | 0 | 6 | 6 | 0.0 | 1.2 only           | 5 | 1 | 83.3  | Memb predominant | 110  | 0  |
| ≥ 2 unique peptides | rmAC2458 | Q5UZN8_HALMA      | <i>trxAl</i>     | Thioredoxin                                                                      | 0 | 0 | 4 | 1 | 0 | 0 | 2 | 2 | 4 | 2 | 6 | 2.0 | 0.7 (2>3X)         | 0 | 6 | 0.0   | Soluble only     | 115  | 0  |
| ≥ 2 unique peptides | rmAC2816 | Q5UYT1_HALMA      | <i>rrmAC2816</i> | Hypothetical protein                                                             | 0 | 0 | 6 | 3 | 0 | 0 | 0 | 0 | 6 | 0 | 6 | ∞   | 0.7 only           | 0 | 6 | 0.0   | Soluble only     | 156  | 0  |
| ≥ 2 unique peptides | rmAC2006 | Q5V0T5_HALMA      | <i>rrmAC2006</i> | Hypothetical protein                                                             | 5 | 3 | 0 | 0 | 1 | 1 | 0 | 0 | 5 | 1 | 6 | 5.0 | 0.7 (>3X)          | 6 | 0 | 100.0 | Memb only        | 232  | 0  |
| ≥ 2 unique peptides | rmAC2121 | Q5V0I3_HALMA      | <i>rrmAC2121</i> | Hypothetical protein                                                             | 4 | 3 | 0 | 0 | 2 | 1 | 0 | 0 | 4 | 2 | 6 | 2.0 | 0.7 (2>3X)         | 6 | 0 | 100.0 | Memb only        | 760  | 3  |
| ≥ 2 unique peptides | rmAC2021 | Q5V0S3_HALMA      | <i>rrmAC2021</i> | Hypothetical protein                                                             | 0 | 0 | 4 | 2 | 0 | 0 | 2 | 2 | 4 | 2 | 6 | 2.0 | 0.7 (2>3X)         | 0 | 6 | 0.0   | Soluble only     | 158  | 0  |
| ≥ 2 unique peptides | rmAC1728 | Q5V1H1_HALMA      | <i>rrmAC1728</i> | Hypothetical protein                                                             | 0 | 0 | 4 | 2 | 0 | 0 | 2 | 2 | 4 | 2 | 6 | 2.0 | 0.7 (2>3X)         | 0 | 6 | 0.0   | Soluble only     | 305  | 0  |
| ≥ 2 unique peptides | rmAC1439 | Q5V286_HALMA      | <i>rrmAC1439</i> | Hypothetical protein                                                             | 0 | 0 | 4 | 2 | 0 | 0 | 2 | 2 | 4 | 2 | 6 | 2.0 | 0.7 (2>3X)         | 0 | 6 | 0.0   | Soluble only     | 165  | 0  |
| ≥ 2 unique peptides | rmAC1970 | Q5V0W6_HALMA      | <i>rrmAC1970</i> | Hypothetical protein                                                             | 0 | 0 | 4 | 2 | 0 | 0 | 2 | 1 | 4 | 2 | 6 | 2.0 | 0.7 (2>3X)         | 0 | 6 | 0.0   | Soluble only     | 376  | 0  |
| ≥ 2 unique peptides | rmAC0803 | Q5V3W2_HALMA      | <i>rrmAC0803</i> | Hypothetical protein                                                             | 3 | 2 | 0 | 0 | 3 | 2 | 0 | 0 | 3 | 3 | 6 | 1.0 | No dramatic change | 6 | 0 | 100.0 | Memb only        | 514  | 0  |
| ≥ 2 unique peptides | rmAC1643 | Q5V1P5_HALMA      | <i>rrmAC1643</i> | Hypothetical protein                                                             | 0 | 0 | 3 | 1 | 0 | 0 | 3 | 3 | 3 | 3 | 6 | 1.0 | No dramatic change | 0 | 6 | 0.0   | Soluble only     | 111  | 0  |
| ≥ 2 unique peptides | rmAC0343 | Q5V511_HALMA      | <i>rrmAC0343</i> | Hypothetical protein                                                             | 0 | 0 | 3 | 2 | 0 | 0 | 3 | 2 | 3 | 3 | 6 | 1.0 | No dramatic change | 0 | 6 | 0.0   | Soluble only     | 375  | 0  |
| ≥ 2 unique peptides | rmAC1658 | Q5V1N1_HALMA      | <i>rrmAC1658</i> | Hypothetical protein                                                             | 2 | 2 | 0 | 0 | 4 | 2 | 0 | 0 | 2 | 4 | 6 | 0.5 | 1.2 (2-3X)         | 6 | 0 | 100.0 | Memb only        | 60   | 2  |
| ≥ 2 unique peptides | rmAC1026 | Q5V3B1_HALMA      | <i>rrmAC1026</i> | Hypothetical protein                                                             | 2 | 1 | 0 | 0 | 4 | 2 | 0 | 0 | 2 | 4 | 6 | 0.5 | 1.2 (2-3X)         | 6 | 0 | 100.0 | Memb only        | 364  | 1  |
| ≥ 2 unique peptides | rmAC2259 | Q5V064_HALMA      | <i>rrmAC2259</i> | Hypothetical protein                                                             | 0 | 0 | 2 | 2 | 0 | 0 | 4 | 2 | 2 | 4 | 6 | 0.5 | 1.2 (2-3X)         | 0 | 6 | 0.0   | Soluble only     | 217  | 0  |
| ≥ 2 unique peptides | rmAC2525 | Q5UZH5_HALMA      | <i>rrmAC2525</i> | Hypothetical protein                                                             | 1 | 1 | 0 | 0 | 5 | 4 | 0 | 0 | 1 | 5 | 6 | 0.2 | 1.2 (>3X)          | 6 | 0 | 100.0 | Memb only        | 244  | 3  |
| ≥ 2 unique peptides | rmAC0253 | Q5V592_HALMA      | <i>rrmAC0253</i> | Hypothetical protein                                                             | 0 | 0 | 1 | 1 | 0 | 0 | 5 | 5 | 1 | 5 | 6 | 0.2 | 1.2 (>3X)          | 0 | 6 | 0.0   | Soluble only     | 170  | 0  |
| ≥ 2 unique peptides | rmAC3455 | Q5UX71_HALMA      | <i>ykbB3</i>     | Chloromuconate cycloisomerase                                                    | 0 | 0 | 5 | 4 | 0 | 0 | 1 | 1 | 5 | 1 | 6 | 5.0 | 0.7 (>3X)          | 0 | 6 | 0.0   | Soluble only     | 345  | 0  |
| ≥ 2 unique peptides | rmAC2449 | Q5UZP6_HALMA      | <i>thiD</i>      | Phosphomethylpyrimidine kinase (EC 2.7.4.7)                                      | 0 | 0 | 5 | 4 | 0 | 0 | 1 | 1 | 5 | 1 | 6 | 5.0 | 0.7 (>3X)          | 0 | 6 | 0.0   | Soluble only     | 461  | 0  |
| ≥ 2 unique peptides | rmAC1884 | TRPA_HALMAReview  | <i>trpA</i>      | Tryptophan synthase alpha chain (EC 4.2.1.20)                                    | 0 | 0 | 5 | 2 | 0 | 0 | 1 | 1 | 5 | 1 | 6 | 5.0 | 0.7 (>3X)          | 0 | 6 | 0.0   | Soluble only     | 293  | 0  |
| ≥ 2 unique peptides | rmAC0637 | Q5V4A8_HALMA      | <i>mcmA1</i>     | Methylmalonyl-CoA mutase subunit alpha                                           | 0 | 0 | 4 | 3 | 0 | 0 | 2 | 2 | 4 | 2 | 6 | 2.0 | 0.7 (2>3X)         | 0 | 6 | 0.0   | Soluble only     | 560  | 0  |
| ≥ 2 unique peptides | rmAC3343 | KCY_HALMAReview   | <i>cmk</i>       | Cytidylyl kinase (EC 2.7.4.14) (CK) (Cytidine monophosphate kinase) (CMP kinase) | 0 | 0 | 4 | 2 | 0 | 0 | 2 | 2 | 4 | 2 | 6 | 2.0 | 0.7 (2>3X)         | 0 | 6 | 0.0   | Soluble only     | 192  | 0  |
| ≥ 2 unique peptides | rmAC3018 | Q5UYB0_HALMA      | <i>hmcA</i>      | Protoporphyrin IX magnesium chelatase                                            | 0 | 0 | 4 | 2 | 0 | 0 | 2 | 1 | 4 | 2 | 6 | 2.0 | 0.7 (2>3X)         | 0 | 6 | 0.0   | Soluble only     | 719  | 0  |
| ≥ 2 unique peptides | rmAC0639 | Q5V4A6_HALMA      | <i>rrmAC0639</i> | Acetyltransferase family                                                         | 0 | 0 | 3 | 3 | 0 | 0 | 3 | 2 | 3 | 3 | 6 | 1.0 | No dramatic change | 0 | 6 | 0.0   | Soluble only     | 194  | 0  |

|                     |          |                   |                  |                                                                                                       |   |   |   |   |   |   |   |   |   |   |   |     |                    |   |   |       |              |      |    |
|---------------------|----------|-------------------|------------------|-------------------------------------------------------------------------------------------------------|---|---|---|---|---|---|---|---|---|---|---|-----|--------------------|---|---|-------|--------------|------|----|
| ≥ 2 unique peptides | rmB0197  | DLDH3_HALMAReview | <i>lpdA3</i>     | Dihydrolipoyl dehydrogenase 3 (EC 1.8.1.4) (Dihydrolipoamide dehydrogenase 3)                         | 0 | 0 | 3 | 1 | 0 | 0 | 3 | 2 | 3 | 3 | 6 | 1.0 | No dramatic change | 0 | 6 | 0.0   | Soluble only | 477  | 0  |
| ≥ 2 unique peptides | rmAC2742 | Q5UYZ7_HALMA      | <i>manC</i>      | Mannose-1-phosphate guanylyltransferase                                                               | 0 | 0 | 3 | 2 | 0 | 0 | 3 | 1 | 3 | 3 | 6 | 1.0 | No dramatic change | 0 | 6 | 0.0   | Soluble only | 331  | 0  |
| ≥ 2 unique peptides | rmAC0958 | Q5V3H3_HALMA      | <i>icfA2</i>     | Carbonic anhydrase                                                                                    | 0 | 0 | 3 | 1 | 0 | 0 | 3 | 2 | 3 | 3 | 6 | 1.0 | No dramatic change | 0 | 6 | 0.0   | Soluble only | 212  | 0  |
| ≥ 2 unique peptides | rmAC0127 | Q5V5K3_HALMA      | <i>aroA</i>      | 3-phosphoshikimate 1-carboxyvinyltransferase (EC 2.5.1.19)                                            | 0 | 0 | 3 | 1 | 0 | 0 | 3 | 2 | 3 | 3 | 6 | 1.0 | No dramatic change | 0 | 6 | 0.0   | Soluble only | 429  | 0  |
| ≥ 2 unique peptides | rmAC1624 | Q5V1R3_HALMA      | <i>soxA3</i>     | Probable sulfite oxidase                                                                              | 2 | 2 | 0 | 0 | 4 | 4 | 0 | 0 | 2 | 4 | 6 | 0.5 | 1.2 (2-3X)         | 6 | 0 | 100.0 | Memb only    | 506  | 5  |
| ≥ 2 unique peptides | rmAC2023 | Q5V0S1_HALMA      | <i>nuoC</i>      | NADH dehydrogenase I chain C D                                                                        | 2 | 1 | 0 | 0 | 4 | 2 | 0 | 0 | 2 | 4 | 6 | 0.5 | 1.2 (2-3X)         | 6 | 0 | 100.0 | Memb only    | 545  | 0  |
| ≥ 2 unique peptides | rmAC0264 | Q5V581_HALMA      | <i>hhd-1</i>     | 3-hydroxyacyl-CoA dehydrogenase (EC 1.1.1.35)                                                         | 0 | 0 | 2 | 2 | 0 | 0 | 4 | 4 | 2 | 4 | 6 | 0.5 | 1.2 (2-3X)         | 0 | 6 | 0.0   | Soluble only | 290  | 0  |
| ≥ 2 unique peptides | rmAC3139 | Q5UY07_HALMA      | <i>maoC2</i>     | MaoC family protein                                                                                   | 0 | 0 | 2 | 1 | 0 | 0 | 4 | 3 | 2 | 4 | 6 | 0.5 | 1.2 (2-3X)         | 0 | 6 | 0.0   | Soluble only | 297  | 0  |
| ≥ 2 unique peptides | rmAC0888 | Q5V3N6_HALMA      | <i>scs</i>       | Succinyl-Coa synthetase (EC 6.2.1.5)                                                                  | 0 | 0 | 2 | 1 | 0 | 0 | 4 | 3 | 2 | 4 | 6 | 0.5 | 1.2 (2-3X)         | 0 | 6 | 0.0   | Soluble only | 701  | 0  |
| ≥ 2 unique peptides | rmAC3268 | Q5UXN9_HALMA      | <i>purQ</i>      | Phosphoribosylformylglycinamide synthase 1 (EC 6.3.5.3)                                               | 0 | 0 | 2 | 1 | 0 | 0 | 4 | 2 | 2 | 4 | 6 | 0.5 | 1.2 (2-3X)         | 0 | 6 | 0.0   | Soluble only | 165  | 0  |
| ≥ 2 unique peptides | rmAC2484 | Q5UZL4_HALMA      | <i>ech3</i>      | Enoyl-CoA hydratase (EC 4.2.1.17)                                                                     | 0 | 0 | 2 | 1 | 0 | 0 | 4 | 2 | 2 | 4 | 6 | 0.5 | 1.2 (2-3X)         | 0 | 6 | 0.0   | Soluble only | 224  | 0  |
| ≥ 2 unique peptides | rmAC0555 | Q5V4I1_HALMA      | <i>gpdB</i>      | Glycerol-3-phosphate dehydrogenase chain B                                                            | 1 | 1 | 0 | 0 | 5 | 4 | 0 | 0 | 1 | 5 | 6 | 0.2 | 1.2 (>3X)          | 6 | 0 | 100.0 | Memb only    | 424  | 0  |
| ≥ 2 unique peptides | rmAC1068 | Q5V372_HALMA      | <i>prkA</i>      | Kinase anchor protein                                                                                 | 0 | 0 | 1 | 1 | 0 | 0 | 5 | 5 | 1 | 5 | 6 | 0.2 | 1.2 (>3X)          | 0 | 6 | 0.0   | Soluble only | 760  | 0  |
| ≥ 2 unique peptides | rmAC1111 | Q5V334_HALMA      | <i>rrmAC1111</i> | Thioredoxin domain containing protein                                                                 | 0 | 0 | 1 | 1 | 0 | 0 | 5 | 4 | 1 | 5 | 6 | 0.2 | 1.2 (>3X)          | 0 | 6 | 0.0   | Soluble only | 733  | 0  |
| ≥ 2 unique peptides | rmAC1917 | Q5V113_HALMA      | <i>glpQ2</i>     | Glycerophosphoryl diester phosphodiesterase (EC 3.1.4.46)                                             | 0 | 0 | 0 | 0 | 0 | 0 | 6 | 3 | 0 | 6 | 6 | 0.0 | 1.2 only           | 0 | 6 | 0.0   | Soluble only | 333  | 0  |
| ≥ 2 unique peptides | pNG7291  | Q5V665_HALMA      | <i>htpX2</i>     | Probable protease HtpX-like (EC 3.4.24.-)                                                             | 5 | 4 | 0 | 0 | 1 | 1 | 0 | 0 | 5 | 1 | 6 | 5.0 | 0.7 (>3X)          | 6 | 0 | 100.0 | Memb only    | 274  | 4  |
| ≥ 2 unique peptides | rmAC1604 | RL29_HALMAReview  | <i>rpl29p</i>    | 50S ribosomal protein L29P (Hmal29) (H133)                                                            | 0 | 0 | 5 | 2 | 0 | 0 | 1 | 1 | 5 | 1 | 6 | 5.0 | 0.7 (>3X)          | 0 | 6 | 0.0   | Soluble only | 71   | 0  |
| ≥ 2 unique peptides | rmAC0965 | Q5V3G6_HALMA      | <i>pelA</i>      | Cell division protein pelota                                                                          | 0 | 0 | 4 | 3 | 0 | 0 | 2 | 1 | 4 | 2 | 6 | 2.0 | 0.7 (2-3X)         | 0 | 6 | 0.0   | Soluble only | 355  | 0  |
| ≥ 2 unique peptides | rmAC2084 | Q5V0L6_HALMA      | <i>nosF-3</i>    | ABC transporter ATP-binding protein                                                                   | 4 | 3 | 0 | 0 | 2 | 2 | 0 | 0 | 4 | 2 | 6 | 2.0 | 0.7 (2-3X)         | 6 | 0 | 100.0 | Memb only    | 314  | 0  |
| ≥ 2 unique peptides | rmAC2858 | Q5UYP5_HALMA      | <i>tatC2</i>     | Sec-independent protein translocase TatC                                                              | 4 | 3 | 0 | 0 | 2 | 1 | 0 | 0 | 4 | 2 | 6 | 2.0 | 0.7 (2-3X)         | 6 | 0 | 100.0 | Memb only    | 539  | 10 |
| ≥ 2 unique peptides | pNG7252  | Q5V699_HALMA      | <i>rbsA</i>      | Ribose ABC transporter ATP-binding                                                                    | 3 | 3 | 0 | 0 | 3 | 3 | 0 | 0 | 3 | 3 | 6 | 1.0 | No dramatic change | 6 | 0 | 100.0 | Memb only    | 595  | 0  |
| ≥ 2 unique peptides | pNG7375  | Q5V5Y7_HALMA      | <i>betL2</i>     | Glycine betaine transporter                                                                           | 1 | 1 | 0 | 0 | 5 | 2 | 0 | 0 | 1 | 5 | 6 | 0.2 | 1.2 (>3X)          | 6 | 0 | 100.0 | Memb only    | 586  | 12 |
| ≥ 2 unique peptides | rmAC3490 | Q5UX40_HALMA      | <i>boa2</i>      | Bacterio-opsin activator-like protein                                                                 | 1 | 1 | 0 | 0 | 2 | 1 | 3 | 2 | 1 | 5 | 6 | 0.2 | 1.2 (>3X)          | 3 | 3 | 50.0  | Memb + Sol   | 215  | 0  |
| ≥ 2 unique peptides | rmAC2354 | Q5UZY0_HALMA      | <i>rrmAC2354</i> | Transcription regulator                                                                               | 0 | 0 | 3 | 3 | 0 | 0 | 2 | 1 | 3 | 2 | 5 | 1.5 | No dramatic change | 0 | 5 | 0.0   | Soluble only | 350  | 0  |
| ≥ 2 unique peptides | rmAC2015 | END4_HALMAReview  | <i>nfo</i>       | Probable endonuclease 4 (EC 3.1.21.2) (Endonuclease IV)(Endodeoxyribonuclease IV)                     | 0 | 0 | 3 | 2 | 0 | 0 | 2 | 1 | 3 | 2 | 5 | 1.5 | No dramatic change | 0 | 5 | 0.0   | Soluble only | 277  | 0  |
| ≥ 2 unique peptides | rmAC2830 | Q5UYR9_HALMA      | <i>rpoE"</i>     | DNA-directed RNA polymerase subunit E"                                                                | 0 | 0 | 3 | 2 | 0 | 0 | 2 | 1 | 3 | 2 | 5 | 1.5 | No dramatic change | 0 | 5 | 0.0   | Soluble only | 65   | 0  |
| ≥ 2 unique peptides | rmAC2070 | Q5V0M9_HALMA      | <i>boa</i>       | Putative light-and oxygen-sensing transcription regulator                                             | 0 | 0 | 3 | 2 | 0 | 0 | 2 | 1 | 3 | 2 | 5 | 1.5 | No dramatic change | 0 | 5 | 0.0   | Soluble only | 526  | 0  |
| ≥ 2 unique peptides | rmAC2550 | Q5UZF5_HALMA      | <i>mutL</i>      | DNA mismatch repair protein mutL                                                                      | 0 | 0 | 2 | 2 | 0 | 0 | 3 | 3 | 2 | 3 | 5 | 0.7 | No dramatic change | 0 | 5 | 0.0   | Soluble only | 746  | 0  |
| ≥ 2 unique peptides | rmAC2416 | Q5UZS4_HALMA      | <i>rrmAC2416</i> | Sensor protein (EC 2.7.13.3)                                                                          | 0 | 0 | 2 | 2 | 0 | 0 | 3 | 2 | 2 | 3 | 5 | 0.7 | No dramatic change | 0 | 5 | 0.0   | Soluble only | 1047 | 0  |
| ≥ 2 unique peptides | rmAC0696 | Q5V458_HALMA      | <i>rrmAC0696</i> | Hypothetical protein                                                                                  | 5 | 4 | 0 | 0 | 0 | 0 | 0 | 0 | 5 | 0 | 5 | ∞   | 0.7 only           | 5 | 0 | 100.0 | Memb only    | 299  | 0  |
| ≥ 2 unique peptides | pNG6054  | Q5V6Y4_HALMA      | <i>pNG6054</i>   | Hypothetical protein                                                                                  | 4 | 2 | 0 | 0 | 1 | 1 | 0 | 0 | 4 | 1 | 5 | 4.0 | 0.7 (>3X)          | 5 | 0 | 100.0 | Memb only    | 348  | 1  |
| ≥ 2 unique peptides | pNG4013  | Q5V719_HALMA      | <i>pNG4013</i>   | Hypothetical protein                                                                                  | 0 | 0 | 4 | 2 | 0 | 0 | 1 | 1 | 4 | 1 | 5 | 4.0 | 0.7 (>3X)          | 0 | 5 | 0.0   | Soluble only | 138  | 0  |
| ≥ 2 unique peptides | rmAC1727 | Q5V1H2_HALMA      | <i>rrmAC1727</i> | Hypothetical protein                                                                                  | 3 | 2 | 0 | 0 | 2 | 2 | 0 | 0 | 3 | 2 | 5 | 1.5 | No dramatic change | 5 | 0 | 100.0 | Memb only    | 143  | 1  |
| ≥ 2 unique peptides | rmAC2016 | Q5V0S7_HALMA      | <i>rrmAC2016</i> | Hypothetical protein                                                                                  | 3 | 2 | 0 | 0 | 2 | 1 | 0 | 0 | 3 | 2 | 5 | 1.5 | No dramatic change | 5 | 0 | 100.0 | Memb only    | 128  | 2  |
| ≥ 2 unique peptides | rmAC3242 | Q5UXR2_HALMA      | <i>rrmAC3242</i> | Hypothetical protein                                                                                  | 3 | 1 | 0 | 0 | 2 | 2 | 0 | 0 | 3 | 2 | 5 | 1.5 | No dramatic change | 5 | 0 | 100.0 | Memb only    | 777  | 11 |
| ≥ 2 unique peptides | rmB0220  | Q5UWF3_HALMA      | <i>rmB0220</i>   | Hypothetical protein                                                                                  | 0 | 0 | 3 | 3 | 0 | 0 | 2 | 2 | 3 | 2 | 5 | 1.5 | No dramatic change | 0 | 5 | 0.0   | Soluble only | 239  | 0  |
| ≥ 2 unique peptides | rmB0248  | Q5UWD0_HALMA      | <i>rmB0248</i>   | Hypothetical protein                                                                                  | 0 | 0 | 3 | 3 | 0 | 0 | 2 | 1 | 3 | 2 | 5 | 1.5 | No dramatic change | 0 | 5 | 0.0   | Soluble only | 144  | 0  |
| ≥ 2 unique peptides | rmAC1793 | Q5V1B8_HALMA      | <i>rrmAC1793</i> | Hypothetical protein                                                                                  | 0 | 0 | 3 | 2 | 0 | 0 | 2 | 2 | 3 | 2 | 5 | 1.5 | No dramatic change | 0 | 5 | 0.0   | Soluble only | 249  | 0  |
| ≥ 2 unique peptides | rmAC2745 | Q5UYZ4_HALMA      | <i>rrmAC2745</i> | Hypothetical protein                                                                                  | 0 | 0 | 3 | 2 | 0 | 0 | 2 | 1 | 3 | 2 | 5 | 1.5 | No dramatic change | 0 | 5 | 0.0   | Soluble only | 204  | 0  |
| ≥ 2 unique peptides | pNG7138  | Q5V6K4_HALMA      | <i>pNG7138</i>   | Hypothetical protein                                                                                  | 0 | 0 | 3 | 2 | 0 | 0 | 2 | 1 | 3 | 2 | 5 | 1.5 | No dramatic change | 0 | 5 | 0.0   | Soluble only | 144  | 0  |
| ≥ 2 unique peptides | rmAC1576 | Q5V1V8_HALMA      | <i>rrmAC1576</i> | Hypothetical protein                                                                                  | 2 | 2 | 0 | 0 | 3 | 2 | 0 | 0 | 2 | 3 | 5 | 0.7 | No dramatic change | 5 | 0 | 100.0 | Memb only    | 310  | 0  |
| ≥ 2 unique peptides | pNG7286  | Q5V669_HALMA      | <i>pNG7286</i>   | Hypothetical protein                                                                                  | 2 | 1 | 0 | 0 | 3 | 2 | 0 | 0 | 2 | 3 | 5 | 0.7 | No dramatic change | 5 | 0 | 100.0 | Memb only    | 584  | 11 |
| ≥ 2 unique peptides | rmB0234  | Q5UWE2_HALMA      | <i>rmB0234</i>   | Hypothetical protein                                                                                  | 0 | 0 | 2 | 1 | 0 | 0 | 3 | 3 | 2 | 3 | 5 | 0.7 | No dramatic change | 0 | 5 | 0.0   | Soluble only | 108  | 0  |
| ≥ 2 unique peptides | rmAC1721 | Q5V1H6_HALMA      | <i>rrmAC1721</i> | Hypothetical protein                                                                                  | 0 | 0 | 2 | 2 | 0 | 0 | 3 | 2 | 2 | 3 | 5 | 0.7 | No dramatic change | 0 | 5 | 0.0   | Soluble only | 236  | 0  |
| ≥ 2 unique peptides | rmAC1629 | Q5V1Q9_HALMA      | <i>rrmAC1629</i> | Hypothetical protein                                                                                  | 0 | 0 | 2 | 2 | 0 | 0 | 3 | 2 | 2 | 3 | 5 | 0.7 | No dramatic change | 0 | 5 | 0.0   | Soluble only | 336  | 0  |
| ≥ 2 unique peptides | rmAC0682 | Q5V469_HALMA      | <i>rrmAC0682</i> | Hypothetical protein                                                                                  | 0 | 0 | 2 | 2 | 0 | 0 | 3 | 2 | 2 | 3 | 5 | 0.7 | No dramatic change | 0 | 5 | 0.0   | Soluble only | 146  | 0  |
| ≥ 2 unique peptides | rmAC0592 | Q5V4E9_HALMA      | <i>rrmAC0592</i> | Hypothetical protein                                                                                  | 0 | 0 | 2 | 2 | 0 | 0 | 3 | 2 | 2 | 3 | 5 | 0.7 | No dramatic change | 0 | 5 | 0.0   | Soluble only | 169  | 0  |
| ≥ 2 unique peptides | pNG4044  | Q5V7W3_HALMA      | <i>pNG4044</i>   | Hypothetical protein                                                                                  | 0 | 0 | 2 | 2 | 0 | 0 | 3 | 2 | 2 | 3 | 5 | 0.7 | No dramatic change | 0 | 5 | 0.0   | Soluble only | 79   | 0  |
| ≥ 2 unique peptides | rmAC2864 | Q5UYN9_HALMA      | <i>rrmAC2864</i> | Hypothetical protein                                                                                  | 0 | 0 | 2 | 2 | 0 | 0 | 3 | 1 | 2 | 3 | 5 | 0.7 | No dramatic change | 0 | 5 | 0.0   | Soluble only | 261  | 0  |
| ≥ 2 unique peptides | rmAC3452 | Q5UX73_HALMA      | <i>rrmAC3452</i> | Hypothetical protein                                                                                  | 1 | 1 | 0 | 0 | 4 | 3 | 0 | 0 | 1 | 4 | 5 | 0.3 | 1.2 (>3X)          | 5 | 0 | 100.0 | Memb only    | 316  | 0  |
| ≥ 2 unique peptides | rmAC1398 | Q5V2C5_HALMA      | <i>rrmAC1398</i> | Hypothetical protein                                                                                  | 1 | 1 | 0 | 0 | 4 | 3 | 0 | 0 | 1 | 4 | 5 | 0.3 | 1.2 (>3X)          | 5 | 0 | 100.0 | Memb only    | 518  | 11 |
| ≥ 2 unique peptides | rmAC1654 | Q5V1N5_HALMA      | <i>rrmAC1654</i> | Hypothetical protein                                                                                  | 1 | 1 | 0 | 0 | 4 | 2 | 0 | 0 | 1 | 4 | 5 | 0.3 | 1.2 (>3X)          | 5 | 0 | 100.0 | Memb only    | 190  | 0  |
| ≥ 2 unique peptides | rmAC2718 | Q5UZ18_HALMA      | <i>rrmAC2718</i> | Hypothetical protein                                                                                  | 0 | 0 | 1 | 1 | 0 | 0 | 4 | 3 | 1 | 4 | 5 | 0.3 | 1.2 (>3X)          | 0 | 5 | 0.0   | Soluble only | 159  | 0  |
| ≥ 2 unique peptides | rmAC3332 | Q5UX11_HALMA      | <i>rrmAC3332</i> | Hypothetical protein                                                                                  | 0 | 0 | 0 | 0 | 0 | 0 | 5 | 3 | 0 | 5 | 5 | 0.0 | 1.2 only           | 0 | 5 | 0.0   | Soluble only | 249  | 0  |
| ≥ 2 unique peptides | rmAC3000 | Q5UYC5_HALMA      | <i>cbiL</i>      | Precorrin-2 C20-methyltransferase                                                                     | 2 | 2 | 3 | 2 | 0 | 0 | 0 | 0 | 5 | 0 | 5 | ∞   | 0.7 only           | 2 | 3 | 40.0  | Memb + Sol   | 265  | 0  |
| ≥ 2 unique peptides | rmAC3258 | ATGT_HALMAReview  | <i>tgtA</i>      | 7-cyano-7-deazaguanine (tRNA-ribosyltransferase (EC 2.4.2.-) (Archaeal tRNA-guanine transglycosylase) | 0 | 0 | 5 | 2 | 0 | 0 | 0 | 0 | 5 | 0 | 5 | ∞   | 0.7 only           | 0 | 5 | 0.0   | Soluble only | 490  | 0  |



|                     |          |                   |           |                                                                                                                                                                                         |   |   |   |   |   |   |   |   |   |   |   |     |                    |   |   |       |                     |      |    |
|---------------------|----------|-------------------|-----------|-----------------------------------------------------------------------------------------------------------------------------------------------------------------------------------------|---|---|---|---|---|---|---|---|---|---|---|-----|--------------------|---|---|-------|---------------------|------|----|
| ≥ 2 unique peptides | rmB0259  | Q5WUC2_HALMA      | fapS      | Cyclopropane-fatty-acyl-phospholipid synthase (EC 2.1.1.79)                                                                                                                             | 0 | 0 | 5 | 2 | 0 | 0 | 0 | 0 | 5 | 0 | 5 | ∞   | 0.7 only           | 0 | 5 | 0.0   | Soluble only        | 240  | 0  |
| ≥ 2 unique peptides | rmAC1873 | Q5V148_HALMA      | dpq       | Dolichol-P-glucose synthetase                                                                                                                                                           | 4 | 4 | 0 | 0 | 1 | 1 | 0 | 0 | 4 | 1 | 5 | 4.0 | 0.7 (>3X)          | 5 | 0 | 100.0 | Memb only           | 605  | 7  |
| ≥ 2 unique peptides | rmAC1074 | Q5V366_HALMA      | fadD3     | Long-chain fatty-acid-CoA ligase                                                                                                                                                        | 3 | 3 | 1 | 1 | 1 | 1 | 0 | 0 | 4 | 1 | 5 | 4.0 | 0.7 (>3X)          | 4 | 1 | 80.0  | Memb predominant    | 660  | 0  |
| ≥ 2 unique peptides | rmAC2371 | HIS2_HALMAReview  | hisE      | Phosphoribosyl-ATP pyrophosphatase (EC 3.6.1.31) (PRA-PH)                                                                                                                               | 0 | 0 | 4 | 3 | 0 | 0 | 1 | 1 | 4 | 1 | 5 | 4.0 | 0.7 (>3X)          | 0 | 5 | 0.0   | Soluble only        | 98   | 0  |
| ≥ 2 unique peptides | rmAC1910 | Q5V119_HALMA      | fbr1      | Cytochrome-like protein Fbr                                                                                                                                                             | 3 | 2 | 0 | 0 | 2 | 1 | 0 | 0 | 3 | 2 | 5 | 1.5 | No dramatic change | 5 | 0 | 100.0 | Memb only           | 823  | 0  |
| ≥ 2 unique peptides | rmAC1776 | DCD_HALMAReview   | dcd       | Probable deoxycytidine triphosphate deaminase (EC 3.5.4.13) (dCTPdeaminase)                                                                                                             | 0 | 0 | 3 | 3 | 0 | 0 | 2 | 2 | 3 | 2 | 5 | 1.5 | No dramatic change | 0 | 5 | 0.0   | Soluble only        | 195  | 0  |
| ≥ 2 unique peptides | rmAC0866 | CAAL_HALMAReview  | rrmAC0866 | Carboxylate-amine ligase rrmAC0866 (EC 6.3.-.-)                                                                                                                                         | 0 | 0 | 3 | 2 | 0 | 0 | 2 | 2 | 3 | 2 | 5 | 1.5 | No dramatic change | 0 | 5 | 0.0   | Soluble only        | 359  | 0  |
| ≥ 2 unique peptides | rmAC1004 | Q5V3D2_HALMA      | subB1     | Inositol-1-monophosphatase (EC 3.1.3.25)                                                                                                                                                | 0 | 0 | 3 | 1 | 0 | 0 | 2 | 2 | 3 | 2 | 5 | 1.5 | No dramatic change | 0 | 5 | 0.0   | Soluble only        | 279  | 0  |
| ≥ 2 unique peptides | rmAC1858 | Q5V161_HALMA      | rrmAC1858 | Aldo/keto reductase                                                                                                                                                                     | 0 | 0 | 2 | 1 | 0 | 0 | 3 | 3 | 2 | 3 | 5 | 0.7 | No dramatic change | 0 | 5 | 0.0   | Soluble only        | 361  | 0  |
| ≥ 2 unique peptides | rmAC3480 | Q5UX49_HALMA      | moaB2     | Molybdenum cofactor biosynthesis protein B                                                                                                                                              | 0 | 0 | 2 | 2 | 0 | 0 | 3 | 2 | 2 | 3 | 5 | 0.7 | No dramatic change | 0 | 5 | 0.0   | Soluble only        | 321  | 0  |
| ≥ 2 unique peptides | rmAC1893 | Q5V132_HALMA      | ldc       | LD-carboxypeptidase                                                                                                                                                                     | 0 | 0 | 2 | 2 | 0 | 0 | 3 | 2 | 2 | 3 | 5 | 0.7 | No dramatic change | 0 | 5 | 0.0   | Soluble only        | 353  | 0  |
| ≥ 2 unique peptides | rmAC1236 | Q5V2S2_HALMA      | cysK1     | Cysteine synthase (EC 2.5.1.47)                                                                                                                                                         | 0 | 0 | 2 | 2 | 0 | 0 | 3 | 2 | 2 | 3 | 5 | 0.7 | No dramatic change | 0 | 5 | 0.0   | Soluble only        | 303  | 0  |
| ≥ 2 unique peptides | rmAC0102 | Q5V5M4_HALMA      | npd       | 2-nitropropane dioxygenase-related protein                                                                                                                                              | 0 | 0 | 2 | 1 | 0 | 0 | 3 | 2 | 2 | 3 | 5 | 0.7 | No dramatic change | 0 | 5 | 0.0   | Soluble only        | 337  | 0  |
| ≥ 2 unique peptides | rmAC2529 | HIS4_HALMAReview  | hisA      | 1-(5-phosphoribosyl)-5-[(5-phosphoribosylamino)methylideneamino]imidazole-4-carboxamide isomerase (EC 5.3.1.16)(Phosphoribosylformimino-5-aminoimidazole carboxamide ribotideisomerase) | 0 | 0 | 1 | 1 | 0 | 0 | 4 | 4 | 1 | 4 | 5 | 0.3 | 1.2 (>3X)          | 0 | 5 | 0.0   | Soluble only        | 246  | 0  |
| ≥ 2 unique peptides | rmAC1650 | PCRB_HALMAReview  | pcrB      | Protein pcrB homolog                                                                                                                                                                    | 0 | 0 | 1 | 1 | 0 | 0 | 4 | 2 | 1 | 4 | 5 | 0.3 | 1.2 (>3X)          | 0 | 5 | 0.0   | Soluble only        | 253  | 0  |
| ≥ 2 unique peptides | rmAC2671 | Q5UZ55_HALMA      | inb       | Oxidoreductase-like                                                                                                                                                                     | 0 | 0 | 0 | 0 | 0 | 0 | 5 | 3 | 0 | 5 | 5 | 0.0 | 1.2 only           | 0 | 5 | 0.0   | Soluble only        | 247  | 0  |
| ≥ 2 unique peptides | rmAC1292 | SYC_HALMAReview   | cysS      | Cysteinyl-tRNA synthetase (EC 6.1.1.16) (Cysteine-tRNA ligase)(CysRS)                                                                                                                   | 0 | 0 | 0 | 0 | 0 | 0 | 5 | 3 | 0 | 5 | 5 | 0.0 | 1.2 only           | 0 | 5 | 0.0   | Soluble only        | 492  | 0  |
| ≥ 2 unique peptides | pNG7328  | FOLD2_HALMAReview | fold2     | Bifunctional protein fold 2 [Includes: Methylene-tetrahydrofolate dehydrogenase (EC 1.5.1.5); Methylene-tetrahydrofolate cyclohydrolase (EC 3.5.4.9)]                                   | 0 | 0 | 0 | 0 | 0 | 0 | 5 | 2 | 0 | 5 | 5 | 0.0 | 1.2 only           | 0 | 5 | 0.0   | Soluble only        | 297  | 0  |
| ≥ 2 unique peptides | rmAC2435 | Q5UZQ8_HALMA      | rrmAC2435 | Putative phosphoesterase                                                                                                                                                                | 0 | 0 | 0 | 0 | 0 | 0 | 5 | 2 | 0 | 5 | 5 | 0.0 | 1.2 only           | 0 | 5 | 0.0   | Soluble only        | 162  | 0  |
| ≥ 2 unique peptides | rmAC0962 | Q5V3G9_HALMA      | pcm3      | Protein-L-isoaspartate O-methyltransferase (EC 2.1.1.77)                                                                                                                                | 0 | 0 | 0 | 0 | 0 | 0 | 5 | 2 | 0 | 5 | 5 | 0.0 | 1.2 only           | 0 | 5 | 0.0   | Soluble only        | 204  | 0  |
| ≥ 2 unique peptides | rmB0187  | Q5UW11_HALMA      | rrmB0187  | Putative cupin                                                                                                                                                                          | 0 | 0 | 4 | 3 | 0 | 0 | 1 | 1 | 4 | 1 | 5 | 4.0 | 0.7 (>3X)          | 0 | 5 | 0.0   | Soluble only        | 142  | 0  |
| ≥ 2 unique peptides | rmAC0659 | Q5V489_HALMA      | ama       | N-acyl-L-amino acid amidohydrolase                                                                                                                                                      | 0 | 0 | 1 | 1 | 1 | 1 | 3 | 2 | 1 | 4 | 5 | 0.3 | 1.2 (>3X)          | 1 | 4 | 20.0  | Soluble predominant | 423  | 0  |
| ≥ 2 unique peptides | rmAC0939 | Q5V3J0_HALMA      | dpm6      | Dolichyl-phosphate-mannose-protein mannosyltransferase                                                                                                                                  | 5 | 2 | 0 | 0 | 0 | 0 | 0 | 0 | 5 | 0 | 5 | ∞   | 0.7 only           | 5 | 0 | 100.0 | Memb only           | 595  | 10 |
| ≥ 2 unique peptides | rmAC1596 | RL6_HALMAReview   | rpl6p     | 50S ribosomal protein L6p (Hmal6) (H110)                                                                                                                                                | 0 | 0 | 5 | 2 | 0 | 0 | 0 | 0 | 5 | 0 | 5 | ∞   | 0.7 only           | 0 | 5 | 0.0   | Soluble only        | 178  | 0  |
| ≥ 2 unique peptides | rmAC2466 | Q5UZ0_HALMA       | livM-5    | Branched-chain amino acid ABC transporter permease protein                                                                                                                              | 4 | 4 | 0 | 0 | 1 | 1 | 0 | 0 | 4 | 1 | 5 | 4.0 | 0.7 (>3X)          | 5 | 0 | 100.0 | Memb only           | 369  | 8  |
| ≥ 2 unique peptides | rmAC1749 | Q5V1F4_HALMA      | glnH2     | Glutamine ABC transporter permease protein                                                                                                                                              | 2 | 2 | 0 | 0 | 3 | 2 | 0 | 0 | 2 | 3 | 5 | 0.7 | No dramatic change | 5 | 0 | 100.0 | Memb only           | 226  | 3  |
| ≥ 2 unique peptides | rmAC2527 | Q5UZH3_HALMA      | ylaA      | Anion permease                                                                                                                                                                          | 2 | 1 | 0 | 0 | 3 | 2 | 0 | 0 | 2 | 3 | 5 | 0.7 | No dramatic change | 5 | 0 | 100.0 | Memb only           | 402  | 10 |
| ≥ 2 unique peptides | rmAC1769 | Q5V1D8_HALMA      | putP-2    | Sodium-solute symporter putative                                                                                                                                                        | 0 | 0 | 0 | 0 | 5 | 4 | 0 | 0 | 0 | 5 | 5 | 0.0 | 1.2 only           | 5 | 0 | 100.0 | Memb only           | 502  | 13 |
| ≥ 2 unique peptides | rmAC0001 | Q5V5W5_HALMA      | birA      | Biotin-(Acetyl-CoA carboxylase) ligase                                                                                                                                                  | 0 | 0 | 0 | 0 | 0 | 0 | 5 | 4 | 0 | 5 | 5 | 0.0 | 1.2 only           | 0 | 5 | 0.0   | Soluble only        | 315  | 0  |
| ≥ 2 unique peptides | rmAC2691 | DP2L_HALMAReview  | polC      | DNA polymerase II large subunit (EC 2.7.7.7) (Pol II) [Contains: HmapolC intein (Hma pol II intein)]                                                                                    | 0 | 0 | 3 | 3 | 0 | 0 | 1 | 1 | 3 | 1 | 4 | 3.0 | 0.7 (>3X)          | 0 | 4 | 0.0   | Soluble only        | 1395 | 0  |
| ≥ 2 unique peptides | rmAC0475 | Q5V4Q2_HALMA      | rrmAC0475 | Sensor protein (EC 2.7.13.3)                                                                                                                                                            | 0 | 0 | 1 | 1 | 0 | 0 | 3 | 3 | 1 | 3 | 4 | 0.3 | 1.2 (>3X)          | 0 | 4 | 0.0   | Soluble only        | 330  | 0  |
| ≥ 2 unique peptides | rmAC0698 | Q5V457_HALMA      | nusG      | Transcription antitermination protein NusG                                                                                                                                              | 0 | 0 | 1 | 1 | 0 | 0 | 3 | 2 | 1 | 3 | 4 | 0.3 | 1.2 (>3X)          | 0 | 4 | 0.0   | Soluble only        | 145  | 0  |
| ≥ 2 unique peptides | pNG6070  | Q5V731_HALMA      | trx       | DSBA-like thioredoxin                                                                                                                                                                   | 3 | 3 | 0 | 0 | 1 | 1 | 0 | 0 | 3 | 1 | 4 | 3.0 | 0.7 (>3X)          | 4 | 0 | 100.0 | Memb only           | 328  | 0  |
| ≥ 2 unique peptides | rmAC1046 | Q5V392_HALMA      | rrmAC1046 | Hypothetical protein                                                                                                                                                                    | 4 | 3 | 0 | 0 | 0 | 0 | 0 | 0 | 4 | 0 | 4 | ∞   | 0.7 only           | 4 | 0 | 100.0 | Memb only           | 255  | 0  |
| ≥ 2 unique peptides | rmAC3540 | Q5UWZ7_HALMA      | rrmAC3540 | Hypothetical protein                                                                                                                                                                    | 4 | 2 | 0 | 0 | 0 | 0 | 0 | 0 | 4 | 0 | 4 | ∞   | 0.7 only           | 4 | 0 | 100.0 | Memb only           | 521  | 13 |
| ≥ 2 unique peptides | rmAC1221 | Q5V2T7_HALMA      | rrmAC1221 | Hypothetical protein                                                                                                                                                                    | 4 | 2 | 0 | 0 | 0 | 0 | 0 | 0 | 4 | 0 | 4 | ∞   | 0.7 only           | 4 | 0 | 100.0 | Memb only           | 317  | 3  |
| ≥ 2 unique peptides | rmAC0397 | Q5V4W7_HALMA      | rrmAC0397 | Hypothetical protein                                                                                                                                                                    | 0 | 0 | 4 | 3 | 0 | 0 | 0 | 0 | 4 | 0 | 4 | ∞   | 0.7 only           | 0 | 4 | 0.0   | Soluble only        | 298  | 0  |
| ≥ 2 unique peptides | pNG5051  | Q5V7K6_HALMA      | pNG5051   | Hypothetical protein                                                                                                                                                                    | 0 | 0 | 4 | 3 | 0 | 0 | 0 | 0 | 4 | 0 | 4 | ∞   | 0.7 only           | 0 | 4 | 0.0   | Soluble only        | 238  | 0  |
| ≥ 2 unique peptides | rmAC2538 | Q5UZG4_HALMA      | rrmAC2538 | Hypothetical protein                                                                                                                                                                    | 3 | 3 | 0 | 0 | 1 | 1 | 0 | 0 | 3 | 1 | 4 | 3.0 | 0.7 (>3X)          | 4 | 0 | 100.0 | Memb only           | 394  | 1  |
| ≥ 2 unique peptides | rmAC3097 | Q5UY44_HALMA      | rrmAC3097 | Hypothetical protein                                                                                                                                                                    | 0 | 0 | 3 | 3 | 0 | 0 | 1 | 1 | 3 | 1 | 4 | 3.0 | 0.7 (>3X)          | 0 | 4 | 0.0   | Soluble only        | 105  | 0  |
| ≥ 2 unique peptides | pNG7114  | Q5V6M7_HALMA      | pNG7114   | Hypothetical protein                                                                                                                                                                    | 0 | 0 | 3 | 3 | 0 | 0 | 1 | 1 | 3 | 1 | 4 | 3.0 | 0.7 (>3X)          | 0 | 4 | 0.0   | Soluble only        | 229  | 0  |
| ≥ 2 unique peptides | rmAC2943 | Q5UYH5_HALMA      | rrmAC2943 | Hypothetical protein                                                                                                                                                                    | 0 | 0 | 3 | 2 | 0 | 0 | 1 | 1 | 3 | 1 | 4 | 3.0 | 0.7 (>3X)          | 0 | 4 | 0.0   | Soluble only        | 55   | 0  |
| ≥ 2 unique peptides | pNG6006  | Q5V703_HALMA      | pNG6006   | Hypothetical protein                                                                                                                                                                    | 0 | 0 | 3 | 2 | 0 | 0 | 1 | 1 | 3 | 1 | 4 | 3.0 | 0.7 (>3X)          | 0 | 4 | 0.0   | Soluble only        | 196  | 0  |
| ≥ 2 unique peptides | pNG6167  | Q5V7A6_HALMA      | pNG6167   | Hypothetical protein                                                                                                                                                                    | 0 | 0 | 3 | 2 | 0 | 0 | 1 | 1 | 3 | 1 | 4 | 3.0 | 0.7 (>3X)          | 0 | 4 | 0.0   | Soluble only        | 255  | 0  |
| ≥ 2 unique peptides | rmAC3070 | Q5UY66_HALMA      | rrmAC3070 | Hypothetical protein                                                                                                                                                                    | 2 | 2 | 0 | 0 | 2 | 2 | 0 | 0 | 2 | 2 | 4 | 1.0 | No dramatic change | 4 | 0 | 100.0 | Memb only           | 219  | 2  |
| ≥ 2 unique peptides | rmAC3056 | Q5UY78_HALMA      | rrmAC3056 | Hypothetical protein                                                                                                                                                                    | 2 | 2 | 0 | 0 | 2 | 2 | 0 | 0 | 2 | 2 | 4 | 1.0 | No dramatic change | 4 | 0 | 100.0 | Memb only           | 880  | 0  |
| ≥ 2 unique peptides | rmAC0347 | Q5V508_HALMA      | rrmAC0347 | Hypothetical protein                                                                                                                                                                    | 2 | 2 | 0 | 0 | 2 | 2 | 0 | 0 | 2 | 2 | 4 | 1.0 | No dramatic change | 4 | 0 | 100.0 | Memb only           | 149  | 0  |
| ≥ 2 unique peptides | rmAC2732 | Q5UZ06_HALMA      | rrmAC2732 | Hypothetical protein                                                                                                                                                                    | 2 | 2 | 0 | 0 | 2 | 1 | 0 | 0 | 2 | 2 | 4 | 1.0 | No dramatic change | 4 | 0 | 100.0 | Memb only           | 279  | 5  |
| ≥ 2 unique peptides | rmAC1361 | Q5V2G1_HALMA      | rrmAC1361 | Hypothetical protein                                                                                                                                                                    | 2 | 1 | 0 | 0 | 2 | 2 | 0 | 0 | 2 | 2 | 4 | 1.0 | No dramatic change | 4 | 0 | 100.0 | Memb only           | 165  | 0  |
| ≥ 2 unique peptides | rmAC0998 | Q5V3D8_HALMA      | rrmAC0998 | Hypothetical protein                                                                                                                                                                    | 2 | 2 | 0 | 0 | 2 | 1 | 0 | 0 | 2 | 2 | 4 | 1.0 | No dramatic change | 4 | 0 | 100.0 | Memb only           | 196  | 0  |
| ≥ 2 unique peptides | rmAC1336 | Q5V2I4_HALMA      | rrmAC1336 | Hypothetical protein                                                                                                                                                                    | 0 | 0 | 2 | 2 | 0 | 0 | 2 | 2 | 2 | 2 | 4 | 1.0 | No dramatic change | 0 | 4 | 0.0   | Soluble only        | 141  | 0  |
| ≥ 2 unique peptides | rmAC2754 | Q5UY55_HALMA      | rrmAC2754 | Hypothetical protein                                                                                                                                                                    | 0 | 0 | 2 | 2 | 0 | 0 | 2 | 1 | 2 | 2 | 4 | 1.0 | No dramatic change | 0 | 4 | 0.0   | Soluble only        | 138  | 0  |
| ≥ 2 unique peptides | rmAC2641 | Q5UZ80_HALMA      | rrmAC2641 | Hypothetical protein                                                                                                                                                                    | 0 | 0 | 2 | 1 | 0 | 0 | 2 | 2 | 2 | 2 | 4 | 1.0 | No dramatic change | 0 | 4 | 0.0   | Soluble only        | 305  | 0  |



|                     |          |                    |          |                                                                                                                                                                            |   |   |   |   |   |   |   |   |   |   |   |     |            |   |   |       |              |      |    |
|---------------------|----------|--------------------|----------|----------------------------------------------------------------------------------------------------------------------------------------------------------------------------|---|---|---|---|---|---|---|---|---|---|---|-----|------------|---|---|-------|--------------|------|----|
| ≥ 2 unique peptides | rmB0280  | Q5UWA4_HALMA       | rmB0280  | Hypothetical protein                                                                                                                                                       | 3 | 3 | 0 | 0 | 0 | 0 | 0 | 0 | 3 | 0 | 3 | ∞   | 0.7 only   | 3 | 0 | 100.0 | Memb only    | 132  | 0  |
| ≥ 2 unique peptides | rmAC0042 | Q5V5S8_HALMA       | rmAC0042 | Hypothetical protein                                                                                                                                                       | 3 | 3 | 0 | 0 | 0 | 0 | 0 | 0 | 3 | 0 | 3 | ∞   | 0.7 only   | 3 | 0 | 100.0 | Memb only    | 253  | 1  |
| ≥ 2 unique peptides | pNG2038  | Q5V822_HALMA       | pNG2038  | Hypothetical protein                                                                                                                                                       | 3 | 3 | 0 | 0 | 0 | 0 | 0 | 0 | 3 | 0 | 3 | ∞   | 0.7 only   | 3 | 0 | 100.0 | Memb only    | 324  | 0  |
| ≥ 2 unique peptides | rmB0307  | Q5UW81_HALMA       | rmB0307  | Hypothetical protein                                                                                                                                                       | 3 | 2 | 0 | 0 | 0 | 0 | 0 | 0 | 3 | 0 | 3 | ∞   | 0.7 only   | 3 | 0 | 100.0 | Memb only    | 318  | 7  |
| ≥ 2 unique peptides | rmAC1586 | Q5V1U8_HALMA       | rmAC1586 | Hypothetical protein                                                                                                                                                       | 3 | 2 | 0 | 0 | 0 | 0 | 0 | 0 | 3 | 0 | 3 | ∞   | 0.7 only   | 3 | 0 | 100.0 | Memb only    | 470  | 5  |
| ≥ 2 unique peptides | rmAC1092 | Q5V348_HALMA       | rmAC1092 | Hypothetical protein                                                                                                                                                       | 3 | 2 | 0 | 0 | 0 | 0 | 0 | 0 | 3 | 0 | 3 | ∞   | 0.7 only   | 3 | 0 | 100.0 | Memb only    | 121  | 3  |
| ≥ 2 unique peptides | pNG5104  | Q5V7Q7_HALMA       | pNG5104  | Hypothetical protein                                                                                                                                                       | 0 | 0 | 3 | 3 | 0 | 0 | 0 | 0 | 3 | 0 | 3 | ∞   | 0.7 only   | 0 | 3 | 0.0   | Soluble only | 371  | 0  |
| ≥ 2 unique peptides | rmB0166  | Q5UWK0_HALMA       | rmB0166  | Hypothetical protein                                                                                                                                                       | 0 | 0 | 3 | 2 | 0 | 0 | 0 | 0 | 3 | 0 | 3 | ∞   | 0.7 only   | 0 | 3 | 0.0   | Soluble only | 371  | 0  |
| ≥ 2 unique peptides | rmAC0974 | Q5V3F9_HALMA       | rmAC0974 | Hypothetical protein                                                                                                                                                       | 0 | 0 | 3 | 2 | 0 | 0 | 0 | 0 | 3 | 0 | 3 | ∞   | 0.7 only   | 0 | 3 | 0.0   | Soluble only | 551  | 0  |
| ≥ 2 unique peptides | rmAC3528 | Q5UX08_HALMA       | rmAC3528 | Hypothetical protein                                                                                                                                                       | 2 | 2 | 0 | 0 | 1 | 1 | 0 | 0 | 2 | 1 | 3 | 2.0 | 0.7 (2>3X) | 3 | 0 | 100.0 | Memb only    | 158  | 1  |
| ≥ 2 unique peptides | rmAC0631 | Q5V4B3_HALMA       | rmAC0631 | Hypothetical protein                                                                                                                                                       | 2 | 2 | 0 | 0 | 1 | 1 | 0 | 0 | 2 | 1 | 3 | 2.0 | 0.7 (2>3X) | 3 | 0 | 100.0 | Memb only    | 213  | 5  |
| ≥ 2 unique peptides | pNG7304  | Q5V652_HALMA       | pNG7304  | Hypothetical protein                                                                                                                                                       | 2 | 2 | 0 | 0 | 1 | 1 | 0 | 0 | 2 | 1 | 3 | 2.0 | 0.7 (2>3X) | 3 | 0 | 100.0 | Memb only    | 166  | 0  |
| ≥ 2 unique peptides | rmAC2375 | Q5UZW2_HALMA       | rmAC2375 | Hypothetical protein                                                                                                                                                       | 2 | 2 | 0 | 0 | 0 | 0 | 1 | 1 | 2 | 1 | 3 | 2.0 | 0.7 (2>3X) | 2 | 1 | 66.7  | Memb + Sol   | 236  | 1  |
| ≥ 2 unique peptides | rmAC2295 | Q5V033_HALMA       | rmAC2295 | Hypothetical protein                                                                                                                                                       | 2 | 2 | 0 | 0 | 0 | 0 | 1 | 1 | 2 | 1 | 3 | 2.0 | 0.7 (2>3X) | 2 | 1 | 66.7  | Memb + Sol   | 597  | 0  |
| ≥ 2 unique peptides | rmB0286  | Q5UW98_HALMA       | rmB0286  | Hypothetical protein                                                                                                                                                       | 0 | 0 | 2 | 2 | 0 | 0 | 1 | 1 | 2 | 1 | 3 | 2.0 | 0.7 (2>3X) | 0 | 3 | 0.0   | Soluble only | 413  | 0  |
| ≥ 2 unique peptides | rmAC3083 | Q5UY55_HALMA       | rmAC3083 | Hypothetical protein                                                                                                                                                       | 0 | 0 | 2 | 2 | 0 | 0 | 1 | 1 | 2 | 1 | 3 | 2.0 | 0.7 (2>3X) | 0 | 3 | 0.0   | Soluble only | 140  | 0  |
| ≥ 2 unique peptides | rmAC1103 | Q5V340_HALMA       | rmAC1103 | Hypothetical protein                                                                                                                                                       | 0 | 0 | 2 | 2 | 0 | 0 | 1 | 1 | 2 | 1 | 3 | 2.0 | 0.7 (2>3X) | 0 | 3 | 0.0   | Soluble only | 269  | 0  |
| ≥ 2 unique peptides | rmAC3061 | Q5UY74_HALMA       | rmAC3061 | Hypothetical protein                                                                                                                                                       | 1 | 1 | 0 | 0 | 2 | 2 | 0 | 0 | 1 | 2 | 3 | 0.5 | 1.2 (2-3X) | 3 | 0 | 100.0 | Memb only    | 136  | 2  |
| ≥ 2 unique peptides | rmB0188  | Q5UW10_HALMA       | rmB0188  | Hypothetical protein                                                                                                                                                       | 0 | 0 | 1 | 1 | 0 | 0 | 2 | 2 | 1 | 2 | 3 | 0.5 | 1.2 (2-3X) | 0 | 3 | 0.0   | Soluble only | 406  | 0  |
| ≥ 2 unique peptides | rmAC2746 | Q5UYZ3_HALMA       | rmAC2746 | Hypothetical protein                                                                                                                                                       | 0 | 0 | 1 | 1 | 0 | 0 | 2 | 2 | 1 | 2 | 3 | 0.5 | 1.2 (2-3X) | 0 | 3 | 0.0   | Soluble only | 142  | 0  |
| ≥ 2 unique peptides | pNG1009  | Q5V865_HALMA       | pNG1009  | Hypothetical protein                                                                                                                                                       | 0 | 0 | 1 | 1 | 0 | 0 | 2 | 2 | 1 | 2 | 3 | 0.5 | 1.2 (2-3X) | 0 | 3 | 0.0   | Soluble only | 287  | 0  |
| ≥ 2 unique peptides | pNG7317  | Q5V640_HALMA       | pNG7317  | Hypothetical protein                                                                                                                                                       | 0 | 0 | 0 | 0 | 0 | 0 | 3 | 3 | 0 | 3 | 3 | 0.0 | 1.2 only   | 0 | 3 | 0.0   | Soluble only | 243  | 0  |
| ≥ 2 unique peptides | rmAC2803 | Q5UYU4_HALMA       | rmAC2803 | Hypothetical protein                                                                                                                                                       | 0 | 0 | 0 | 0 | 0 | 0 | 3 | 2 | 0 | 3 | 3 | 0.0 | 1.2 only   | 0 | 3 | 0.0   | Soluble only | 365  | 0  |
| ≥ 2 unique peptides | rmAC1780 | Q5V1C8_HALMA       | rmAC1780 | Hypothetical protein                                                                                                                                                       | 0 | 0 | 0 | 0 | 0 | 0 | 3 | 2 | 0 | 3 | 3 | 0.0 | 1.2 only   | 0 | 3 | 0.0   | Soluble only | 253  | 0  |
| ≥ 2 unique peptides | rmAC1015 | Q5V3C2_HALMA       | gtr-7    | Glycosyltransferase (EC 2.4.1.-)                                                                                                                                           | 3 | 2 | 0 | 0 | 0 | 0 | 0 | 0 | 3 | 0 | 3 | ∞   | 0.7 only   | 3 | 0 | 100.0 | Memb only    | 386  | 0  |
| ≥ 2 unique peptides | rmAC1694 | GUAAA_HALMARReview | guaAA    | GMP synthase [glutamine-hydrolyzing] subunit A (EC 6.3.5.2) (Glutamineamidotransferase)                                                                                    | 0 | 0 | 3 | 2 | 0 | 0 | 0 | 0 | 3 | 0 | 3 | ∞   | 0.7 only   | 0 | 3 | 0.0   | Soluble only | 189  | 0  |
| ≥ 2 unique peptides | rmAC0257 | KSGA_HALMARReview  | ksgA     | Probable dimethyladenosine transferase (EC 2.1.1.-) (S-adenosylmethionine-6-N'-adenosyl(rRNA) dimethyltransferase) (16SrRNA dimethylase)                                   | 0 | 0 | 2 | 2 | 0 | 0 | 1 | 1 | 2 | 1 | 3 | 2.0 | 0.7 (2>3X) | 0 | 3 | 0.0   | Soluble only | 285  | 0  |
| ≥ 2 unique peptides | rmAC2159 | Q5V0F0_HALMA       | dcd3     | Probable deoxyuridine 5'-triphosphate nucleotidohydrolase (EC 3.6.1.23)                                                                                                    | 0 | 0 | 2 | 2 | 0 | 0 | 1 | 1 | 2 | 1 | 3 | 2.0 | 0.7 (2>3X) | 0 | 3 | 0.0   | Soluble only | 202  | 0  |
| ≥ 2 unique peptides | rmAC0223 | Q5V5C0_HALMA       | camH3    | Creatinine amidohydrolase (EC 3.5.2.10)                                                                                                                                    | 0 | 0 | 2 | 2 | 0 | 0 | 1 | 1 | 2 | 1 | 3 | 2.0 | 0.7 (2>3X) | 0 | 3 | 0.0   | Soluble only | 256  | 0  |
| ≥ 2 unique peptides | rmAC0554 | Q5V4I2_HALMA       | gpdA     | Glycerol-3-phosphate dehydrogenase (EC 1.1.99.5)                                                                                                                           | 1 | 1 | 0 | 0 | 2 | 2 | 0 | 0 | 1 | 2 | 3 | 0.5 | 1.2 (2-3X) | 3 | 0 | 100.0 | Memb only    | 576  | 0  |
| ≥ 2 unique peptides | rmAC0321 | Q5V531_HALMA       | crtI2    | Phytoene dehydrogenase (EC 1.3.99.-)                                                                                                                                       | 1 | 1 | 0 | 0 | 2 | 2 | 0 | 0 | 1 | 2 | 3 | 0.5 | 1.2 (2-3X) | 3 | 0 | 100.0 | Memb only    | 495  | 0  |
| ≥ 2 unique peptides | rmAC1958 | Q5V0X7_HALMA       | lpg1     | LPS glycosyltransferase                                                                                                                                                    | 1 | 1 | 0 | 0 | 0 | 0 | 2 | 2 | 1 | 2 | 3 | 0.5 | 1.2 (2-3X) | 1 | 2 | 33.3  | Memb + Sol   | 359  | 0  |
| ≥ 2 unique peptides | rmAC0073 | Q5V5P9_HALMA       | cyc      | Cytochrome P450 (EC 1.14.14.1) (EC 1.6.2.4)                                                                                                                                | 1 | 1 | 0 | 0 | 0 | 0 | 2 | 2 | 1 | 2 | 3 | 0.5 | 1.2 (2-3X) | 1 | 2 | 33.3  | Memb + Sol   | 445  | 0  |
| ≥ 2 unique peptides | rmAC3391 | PPNK_HALMARReview  | ppnK     | Probable inorganic polyphosphate/ATP-NAD kinase (EC 2.7.1.23)(Poly(P)/ATP NAD kinase)                                                                                      | 0 | 0 | 1 | 1 | 0 | 0 | 2 | 2 | 1 | 2 | 3 | 0.5 | 1.2 (2-3X) | 0 | 3 | 0.0   | Soluble only | 283  | 0  |
| ≥ 2 unique peptides | rmAC3074 | Q5UY62_HALMA       | rmAC3074 | Hypothetical protein                                                                                                                                                       | 0 | 0 | 1 | 1 | 0 | 0 | 2 | 2 | 1 | 2 | 3 | 0.5 | 1.2 (2-3X) | 0 | 3 | 0.0   | Soluble only | 320  | 0  |
| ≥ 2 unique peptides | rmAC2463 | Q5UZN3_HALMA       | scp2     | Sterol carrier protein                                                                                                                                                     | 0 | 0 | 1 | 1 | 0 | 0 | 2 | 2 | 1 | 2 | 3 | 0.5 | 1.2 (2-3X) | 0 | 3 | 0.0   | Soluble only | 136  | 0  |
| ≥ 2 unique peptides | rmAC1660 | Q5V1M9_HALMA       | yafB-3   | Oxidoreductase aldo/keto reductase family                                                                                                                                  | 0 | 0 | 1 | 1 | 0 | 0 | 2 | 2 | 1 | 2 | 3 | 0.5 | 1.2 (2-3X) | 0 | 3 | 0.0   | Soluble only | 253  | 0  |
| ≥ 2 unique peptides | rmAC1573 | Q5V1W1_HALMA       | galE8    | UDP-glucose 4-epimerase                                                                                                                                                    | 0 | 0 | 1 | 1 | 0 | 0 | 2 | 2 | 1 | 2 | 3 | 0.5 | 1.2 (2-3X) | 0 | 3 | 0.0   | Soluble only | 322  | 0  |
| ≥ 2 unique peptides | rmAC1431 | Q5V294_HALMA       | purK     | Phosphoribosylaminoimidazole carboxylase ATP binding subunit (EC 4.1.1.21)                                                                                                 | 0 | 0 | 1 | 1 | 0 | 0 | 2 | 2 | 1 | 2 | 3 | 0.5 | 1.2 (2-3X) | 0 | 3 | 0.0   | Soluble only | 381  | 0  |
| ≥ 2 unique peptides | rmAC1967 | Q5V0W8_HALMA       | glcD1    | Glycolate oxidase subunit GlcD                                                                                                                                             | 0 | 0 | 0 | 0 | 3 | 2 | 0 | 0 | 0 | 3 | 3 | 0.0 | 1.2 only   | 3 | 0 | 100.0 | Memb only    | 1012 | 0  |
| ≥ 2 unique peptides | pNG7318  | Q5V639_HALMA       | fdhG     | Formate dehydrogenase alpha subunit                                                                                                                                        | 0 | 0 | 0 | 0 | 1 | 1 | 2 | 2 | 0 | 3 | 3 | 0.0 | 1.2 only   | 1 | 2 | 33.3  | Memb + Sol   | 1103 | 0  |
| ≥ 2 unique peptides | rmAC1986 | Q5V0V2_HALMA       | acdC     | Acyl-CoA dehydrogenase (EC 1.3.99.-)                                                                                                                                       | 0 | 0 | 0 | 0 | 0 | 0 | 3 | 3 | 0 | 3 | 3 | 0.0 | 1.2 only   | 0 | 3 | 0.0   | Soluble only | 379  | 0  |
| ≥ 2 unique peptides | pNG7052  | Q5V6U8_HALMA       | adh10    | Zinc-binding dehydrogenase (EC 1.1.1.1) (EC 1.6.5.5)                                                                                                                       | 0 | 0 | 0 | 0 | 0 | 0 | 3 | 3 | 0 | 3 | 3 | 0.0 | 1.2 only   | 0 | 3 | 0.0   | Soluble only | 343  | 0  |
| ≥ 2 unique peptides | rmAC2436 | COFE_HALMARReview  | cofE     | F420-0-gamma-glutamyl ligase (EC 6.3.2.-)                                                                                                                                  | 0 | 0 | 0 | 0 | 0 | 0 | 3 | 2 | 0 | 3 | 3 | 0.0 | 1.2 only   | 0 | 3 | 0.0   | Soluble only | 257  | 0  |
| ≥ 2 unique peptides | rmAC1394 | HIS6_HALMARReview  | hisF     | Imidazole glycerol phosphate synthase subunit hisF (EC 4.1.3.-) (IGPSynthase cyclase subunit) (IGP synthase subunit hisF) (ImGP synthase subunit hisF) (IGPS subunit hisF) | 0 | 0 | 0 | 0 | 0 | 0 | 3 | 2 | 0 | 3 | 3 | 0.0 | 1.2 only   | 0 | 3 | 0.0   | Soluble only | 271  | 0  |
| ≥ 2 unique peptides | pNG4053  | Q5V7X5_HALMA       | cas1     | CRISPR-associated protein Cas1                                                                                                                                             | 0 | 0 | 2 | 2 | 0 | 0 | 1 | 1 | 2 | 1 | 3 | 2.0 | 0.7 (2>3X) | 0 | 3 | 0.0   | Soluble only | 330  | 0  |
| ≥ 2 unique peptides | rmAC1418 | RL12_HALMARReview  | rp12p    | 50S ribosomal protein L12P (Hmal12)                                                                                                                                        | 0 | 0 | 3 | 2 | 0 | 0 | 0 | 0 | 3 | 0 | 3 | ∞   | 0.7 only   | 0 | 3 | 0.0   | Soluble only | 115  | 0  |
| ≥ 2 unique peptides | rmAC1610 | RL4_HALMARReview   | rp14p    | 50S ribosomal protein L14P (Hmal4) (H16)                                                                                                                                   | 0 | 0 | 2 | 2 | 0 | 0 | 1 | 1 | 2 | 1 | 3 | 2.0 | 0.7 (2>3X) | 0 | 3 | 0.0   | Soluble only | 246  | 0  |
| ≥ 2 unique peptides | rmAC1415 | RL1_HALMARReview   | rp11p    | 50S ribosomal protein L1P (Hmal1) (HL8)                                                                                                                                    | 0 | 0 | 1 | 1 | 2 | 2 | 0 | 0 | 1 | 2 | 3 | 0.5 | 1.2 (2-3X) | 2 | 1 | 66.7  | Memb + Sol   | 212  | 0  |
| ≥ 2 unique peptides | rmAC0789 | Q5V3X6_HALMA       | rmAC0789 | Sensor protein (EC 2.7.13.3)                                                                                                                                               | 2 | 2 | 0 | 0 | 1 | 1 | 0 | 0 | 2 | 1 | 3 | 2.0 | 0.7 (2>3X) | 3 | 0 | 100.0 | Memb only    | 576  | 6  |
| ≥ 2 unique peptides | rmAC1411 | Q5V2B2_HALMA       | drg      | GTP-binding protein Drg                                                                                                                                                    | 0 | 0 | 2 | 2 | 0 | 0 | 1 | 1 | 2 | 1 | 3 | 2.0 | 0.7 (2>3X) | 0 | 3 | 0.0   | Soluble only | 369  | 0  |
| ≥ 2 unique peptides | rmAC2314 | Q5V015_HALMA       | trp3     | ABC transport protein                                                                                                                                                      | 2 | 2 | 0 | 0 | 1 | 1 | 0 | 0 | 2 | 1 | 3 | 2.0 | 0.7 (2>3X) | 3 | 0 | 100.0 | Memb only    | 640  | 5  |
| ≥ 2 unique peptides | rmAC0755 | Q5V406_HALMA       | trkH3    | TRK potassium uptake system protein                                                                                                                                        | 2 | 2 | 0 | 0 | 1 | 1 | 0 | 0 | 2 | 1 | 3 | 2.0 | 0.7 (2>3X) | 3 | 0 | 100.0 | Memb only    | 564  | 10 |



|                     |          |                  |                  |                                                                                                                                                                                                      |   |   |   |   |   |   |   |   |   |   |   |     |            |   |   |       |              |     |    |
|---------------------|----------|------------------|------------------|------------------------------------------------------------------------------------------------------------------------------------------------------------------------------------------------------|---|---|---|---|---|---|---|---|---|---|---|-----|------------|---|---|-------|--------------|-----|----|
| ≥ 2 unique peptides | rmB0225  | Q5UWE9_HALMA     | <i>livG-10</i>   | Branched-chain amino acid ABC transporter ATP-binding protein                                                                                                                                        | 1 | 1 | 0 | 0 | 2 | 2 | 0 | 0 | 1 | 2 | 3 | 0.5 | 1.2 (2-3X) | 3 | 0 | 100.0 | Memb only    | 254 | 0  |
| ≥ 2 unique peptides | rmAC1296 | Q5V2M0_HALMA     | <i>corA</i>      | Magnesium Mg(2+)/cobalt Co(2+) transport protein                                                                                                                                                     | 1 | 1 | 0 | 0 | 2 | 2 | 0 | 0 | 1 | 2 | 3 | 0.5 | 1.2 (2-3X) | 3 | 0 | 100.0 | Memb only    | 205 | 2  |
| ≥ 2 unique peptides | rmAC3226 | Q5UXS5_HALMA     | <i>ssf</i>       | Sodium/solute symporter                                                                                                                                                                              | 0 | 0 | 0 | 0 | 3 | 2 | 0 | 0 | 0 | 3 | 3 | 0.0 | 1.2 only   | 3 | 0 | 100.0 | Memb only    | 532 | 12 |
| ≥ 2 unique peptides | rmAC3316 | Q5UXJ7_HALMA     | <i>arsC</i>      | Putative arsenate reductase                                                                                                                                                                          | 0 | 0 | 0 | 0 | 0 | 0 | 3 | 2 | 0 | 3 | 3 | 0.0 | 1.2 only   | 0 | 3 | 0.0   | Soluble only | 142 | 0  |
| ≥ 2 unique peptides | rmAC3482 | Q5UX47_HALMA     | <i>ark-6</i>     | Sensor protein (EC 2.7.13.3)                                                                                                                                                                         | 2 | 2 | 0 | 0 | 0 | 0 | 0 | 0 | 2 | 0 | 2 | ∞   | 0.7 only   | 2 | 0 | 100.0 | Memb only    | 579 | 6  |
| ≥ 2 unique peptides | rmB0062  | Q5UWT3_HALMA     | <i>parA3</i>     | Chromosome partitioning protein ParA family ATPase                                                                                                                                                   | 0 | 0 | 2 | 2 | 0 | 0 | 0 | 0 | 2 | 0 | 2 | ∞   | 0.7 only   | 0 | 2 | 0.0   | Soluble only | 290 | 0  |
| ≥ 2 unique peptides | rmAC2661 | Q5UZ64_HALMA     | <i>rad24</i>     | DNA repair protein                                                                                                                                                                                   | 0 | 0 | 2 | 2 | 0 | 0 | 0 | 0 | 2 | 0 | 2 | ∞   | 0.7 only   | 0 | 2 | 0.0   | Soluble only | 232 | 0  |
| ≥ 2 unique peptides | rmAC1338 | Q5V2I2_HALMA     | <i>arcR-6</i>    | Transcription regulator                                                                                                                                                                              | 0 | 0 | 2 | 2 | 0 | 0 | 0 | 0 | 2 | 0 | 2 | ∞   | 0.7 only   | 0 | 2 | 0.0   | Soluble only | 254 | 0  |
| ≥ 2 unique peptides | rmAC0992 | Q5V3E2_HALMA     | <i>rrmAC0992</i> | DNA binding domain similar to hmvg1864                                                                                                                                                               | 0 | 0 | 2 | 2 | 0 | 0 | 0 | 0 | 2 | 0 | 2 | ∞   | 0.7 only   | 0 | 2 | 0.0   | Soluble only | 91  | 0  |
| ≥ 2 unique peptides | rmAC0404 | Q5V4W2_HALMA     | <i>htr12</i>     | MCP domain signal transducer                                                                                                                                                                         | 0 | 0 | 2 | 2 | 0 | 0 | 0 | 0 | 2 | 0 | 2 | ∞   | 0.7 only   | 0 | 2 | 0.0   | Soluble only | 438 | 0  |
| ≥ 2 unique peptides | rmAC0067 | RPON_HALMAReview | <i>rpoN</i>      | DNA-directed RNA polymerase subunit N (EC 2.7.7.6)                                                                                                                                                   | 0 | 0 | 2 | 2 | 0 | 0 | 0 | 0 | 2 | 0 | 2 | ∞   | 0.7 only   | 0 | 2 | 0.0   | Soluble only | 66  | 0  |
| ≥ 2 unique peptides | rmAC2996 | UVRB_HALMAReview | <i>uvrB</i>      | UvrABC system protein B (Protein uvrB) (Excinuclease ABC subunit B)                                                                                                                                  | 0 | 0 | 2 | 2 | 0 | 0 | 0 | 0 | 2 | 0 | 2 | ∞   | 0.7 only   | 0 | 2 | 0.0   | Soluble only | 686 | 0  |
| ≥ 2 unique peptides | pNG6094  | Q5V755_HALMA     | <i>xseA1</i>     | Probable exodeoxyribonuclease VII large subunit (EC 3.1.11.6)                                                                                                                                        | 0 | 0 | 0 | 0 | 2 | 2 | 0 | 0 | 0 | 2 | 2 | 0.0 | 1.2 only   | 2 | 0 | 100.0 | Memb only    | 350 | 1  |
| ≥ 2 unique peptides | rmAC2144 | Q5V0G5_HALMA     | <i>rrmAC2144</i> | Transcription regulator                                                                                                                                                                              | 0 | 0 | 0 | 0 | 0 | 0 | 2 | 2 | 0 | 2 | 2 | 0.0 | 1.2 only   | 0 | 2 | 0.0   | Soluble only | 353 | 0  |
| ≥ 2 unique peptides | rmAC1303 | Q5V2L3_HALMA     | <i>rrmAC1303</i> | Transcription regulator                                                                                                                                                                              | 0 | 0 | 0 | 0 | 0 | 0 | 2 | 2 | 0 | 2 | 2 | 0.0 | 1.2 only   | 0 | 2 | 0.0   | Soluble only | 124 | 0  |
| ≥ 2 unique peptides | rmAC1096 | Q5V346_HALMA     | <i>kinA4</i>     | Sensor protein (EC 2.7.13.3)                                                                                                                                                                         | 0 | 0 | 0 | 0 | 0 | 0 | 2 | 2 | 0 | 2 | 2 | 0.0 | 1.2 only   | 0 | 2 | 0.0   | Soluble only | 449 | 0  |
| ≥ 2 unique peptides | rmB0096  | Q5UWQ4_HALMA     | <i>rmB0096</i>   | Hypothetical protein                                                                                                                                                                                 | 2 | 2 | 0 | 0 | 0 | 0 | 0 | 0 | 2 | 0 | 2 | ∞   | 0.7 only   | 2 | 0 | 100.0 | Memb only    | 646 | 0  |
| ≥ 2 unique peptides | rmAC3534 | Q5UX02_HALMA     | <i>rrmAC3534</i> | Hypothetical protein                                                                                                                                                                                 | 2 | 2 | 0 | 0 | 0 | 0 | 0 | 0 | 2 | 0 | 2 | ∞   | 0.7 only   | 2 | 0 | 100.0 | Memb only    | 181 | 5  |
| ≥ 2 unique peptides | rmAC3317 | Q5UXJ6_HALMA     | <i>rrmAC3317</i> | Hypothetical protein                                                                                                                                                                                 | 2 | 2 | 0 | 0 | 0 | 0 | 0 | 0 | 2 | 0 | 2 | ∞   | 0.7 only   | 2 | 0 | 100.0 | Memb only    | 283 | 5  |
| ≥ 2 unique peptides | pNG6024  | Q5V707_HALMA     | <i>pNG6024</i>   | Hypothetical protein                                                                                                                                                                                 | 2 | 2 | 0 | 0 | 0 | 0 | 0 | 0 | 2 | 0 | 2 | ∞   | 0.7 only   | 2 | 0 | 100.0 | Memb only    | 199 | 2  |
| ≥ 2 unique peptides | rmAC1235 | Q5V2S3_HALMA     | <i>rrmAC1235</i> | Hypothetical protein                                                                                                                                                                                 | 0 | 0 | 2 | 2 | 0 | 0 | 0 | 0 | 2 | 0 | 2 | ∞   | 0.7 only   | 0 | 2 | 0.0   | Soluble only | 179 | 0  |
| ≥ 2 unique peptides | pNG5109  | Q5V7R3_HALMA     | <i>pNG5109</i>   | Hypothetical protein                                                                                                                                                                                 | 0 | 0 | 2 | 2 | 0 | 0 | 0 | 0 | 2 | 0 | 2 | ∞   | 0.7 only   | 0 | 2 | 0.0   | Soluble only | 326 | 0  |
| ≥ 2 unique peptides | pNG3015  | Q5V7Y7_HALMA     | <i>pNG3015</i>   | Hypothetical protein                                                                                                                                                                                 | 0 | 0 | 2 | 2 | 0 | 0 | 0 | 0 | 2 | 0 | 2 | ∞   | 0.7 only   | 0 | 2 | 0.0   | Soluble only | 155 | 0  |
| ≥ 2 unique peptides | rmAC3368 | Q5UXE8_HALMA     | <i>rrmAC3368</i> | Hypothetical protein                                                                                                                                                                                 | 0 | 0 | 0 | 0 | 2 | 2 | 0 | 0 | 0 | 2 | 2 | 0.0 | 1.2 only   | 2 | 0 | 100.0 | Memb only    | 291 | 2  |
| ≥ 2 unique peptides | rmAC3260 | Q5UXP7_HALMA     | <i>rrmAC3260</i> | Hypothetical protein                                                                                                                                                                                 | 0 | 0 | 0 | 0 | 2 | 2 | 0 | 0 | 0 | 2 | 2 | 0.0 | 1.2 only   | 2 | 0 | 100.0 | Memb only    | 381 | 0  |
| ≥ 2 unique peptides | rmAC1644 | Q5V1P4_HALMA     | <i>rrmAC1644</i> | Hypothetical protein                                                                                                                                                                                 | 0 | 0 | 0 | 0 | 2 | 2 | 0 | 0 | 0 | 2 | 2 | 0.0 | 1.2 only   | 2 | 0 | 100.0 | Memb only    | 271 | 4  |
| ≥ 2 unique peptides | rmAC0424 | Q5V4U4_HALMA     | <i>rrmAC0424</i> | Hypothetical protein                                                                                                                                                                                 | 0 | 0 | 0 | 0 | 2 | 2 | 0 | 0 | 0 | 2 | 2 | 0.0 | 1.2 only   | 2 | 0 | 100.0 | Memb only    | 322 | 0  |
| ≥ 2 unique peptides | pNG7055  | Q5V6S9_HALMA     | <i>pNG7055</i>   | Hypothetical protein                                                                                                                                                                                 | 0 | 0 | 0 | 0 | 2 | 2 | 0 | 0 | 0 | 2 | 2 | 0.0 | 1.2 only   | 2 | 0 | 100.0 | Memb only    | 269 | 1  |
| ≥ 2 unique peptides | pNG6041  | Q5V713_HALMA     | <i>pNG6041</i>   | Hypothetical protein                                                                                                                                                                                 | 0 | 0 | 0 | 0 | 2 | 2 | 0 | 0 | 0 | 2 | 2 | 0.0 | 1.2 only   | 2 | 0 | 100.0 | Memb only    | 177 | 4  |
| ≥ 2 unique peptides | rmAC3217 | Q5UXT3_HALMA     | <i>rrmAC3217</i> | Hypothetical protein                                                                                                                                                                                 | 0 | 0 | 0 | 0 | 0 | 0 | 2 | 2 | 0 | 2 | 2 | 0.0 | 1.2 only   | 0 | 2 | 0.0   | Soluble only | 425 | 0  |
| ≥ 2 unique peptides | rmAC1189 | Q5V2W4_HALMA     | <i>rrmAC1189</i> | Hypothetical protein                                                                                                                                                                                 | 0 | 0 | 0 | 0 | 0 | 0 | 2 | 2 | 0 | 2 | 2 | 0.0 | 1.2 only   | 0 | 2 | 0.0   | Soluble only | 170 | 0  |
| ≥ 2 unique peptides | rmAC1090 | Q5V350_HALMA     | <i>rrmAC1090</i> | Hypothetical protein                                                                                                                                                                                 | 0 | 0 | 0 | 0 | 0 | 0 | 2 | 2 | 0 | 2 | 2 | 0.0 | 1.2 only   | 0 | 2 | 0.0   | Soluble only | 340 | 0  |
| ≥ 2 unique peptides | rmAC0994 | Q5V3E1_HALMA     | <i>rrmAC0994</i> | Hypothetical protein                                                                                                                                                                                 | 0 | 0 | 0 | 0 | 0 | 0 | 2 | 2 | 0 | 2 | 2 | 0.0 | 1.2 only   | 0 | 2 | 0.0   | Soluble only | 239 | 0  |
| ≥ 2 unique peptides | rmAC2850 | Q5UYQ2_HALMA     | <i>pcbD-1</i>    | Hydrolase alpha/beta hydrolase fold family                                                                                                                                                           | 2 | 2 | 0 | 0 | 0 | 0 | 0 | 0 | 2 | 0 | 2 | ∞   | 0.7 only   | 2 | 0 | 100.0 | Memb only    | 298 | 0  |
| ≥ 2 unique peptides | rmAC2139 | Q5V0H0_HALMA     | <i>imd3</i>      | Inosine monophosphate dehydrogenase (EC 1.1.1.205)                                                                                                                                                   | 2 | 2 | 0 | 0 | 0 | 0 | 0 | 0 | 2 | 0 | 2 | ∞   | 0.7 only   | 2 | 0 | 100.0 | Memb only    | 358 | 3  |
| ≥ 2 unique peptides | rmAC0532 | Q5V4K1_HALMA     | <i>pgsA</i>      | CDP-diacylglycerol-glycerol-3-phosphate 3-phosphatidyltransferase (EC 2.7.8.5)                                                                                                                       | 2 | 2 | 0 | 0 | 0 | 0 | 0 | 0 | 2 | 0 | 2 | ∞   | 0.7 only   | 2 | 0 | 100.0 | Memb only    | 202 | 3  |
| ≥ 2 unique peptides | rmAC0409 | Q5V4V8_HALMA     | <i>lemA</i>      | LemA protein                                                                                                                                                                                         | 2 | 2 | 0 | 0 | 0 | 0 | 0 | 0 | 2 | 0 | 2 | ∞   | 0.7 only   | 2 | 0 | 100.0 | Memb only    | 193 | 1  |
| ≥ 2 unique peptides | pNG7073  | Q5V6R2_HALMA     | <i>qgd</i>       | Quinoprotein glucose dehydrogenase (EC 1.1.5.2)                                                                                                                                                      | 2 | 2 | 0 | 0 | 0 | 0 | 0 | 0 | 2 | 0 | 2 | ∞   | 0.7 only   | 2 | 0 | 100.0 | Memb only    | 402 | 0  |
| ≥ 2 unique peptides | rmB0310  | Q5UW78_HALMA     | <i>fmn</i>       | Fmn oxidoreductase protein                                                                                                                                                                           | 0 | 0 | 2 | 2 | 0 | 0 | 0 | 0 | 2 | 0 | 2 | ∞   | 0.7 only   | 0 | 2 | 0.0   | Soluble only | 407 | 0  |
| ≥ 2 unique peptides | rmAC0857 | Q5V3R4_HALMA     | <i>rrmAC0857</i> | Hypothetical protein                                                                                                                                                                                 | 0 | 0 | 2 | 2 | 0 | 0 | 0 | 0 | 2 | 0 | 2 | ∞   | 0.7 only   | 0 | 2 | 0.0   | Soluble only | 180 | 0  |
| ≥ 2 unique peptides | rmAC0331 | Q5V521_HALMA     | <i>itvN</i>      | Acetolactate synthase small subunit (EC 2.2.1.6)                                                                                                                                                     | 0 | 0 | 2 | 2 | 0 | 0 | 0 | 0 | 2 | 0 | 2 | ∞   | 0.7 only   | 0 | 2 | 0.0   | Soluble only | 199 | 0  |
| ≥ 2 unique peptides | rmAC2788 | TRM1_HALMAReview | <i>trm1</i>      | N(2),N(2)-dimethylguanosine tRNA methyltransferase (EC 2.1.1.32)(tRNA(guanine-26,N(2)-N(2)) methyltransferase) (tRNA 2,2-dimethylguanosine-26 methyltransferase)(tRNA(m(2,2)G26)dimethyltransferase) | 0 | 0 | 2 | 2 | 0 | 0 | 0 | 0 | 2 | 0 | 2 | ∞   | 0.7 only   | 0 | 2 | 0.0   | Soluble only | 367 | 0  |
| ≥ 2 unique peptides | rmAC3145 | Q5UY01_HALMA     | <i>adk</i>       | Adenylate kinase                                                                                                                                                                                     | 0 | 0 | 0 | 0 | 0 | 0 | 2 | 2 | 0 | 2 | 2 | 0.0 | 1.2 only   | 0 | 2 | 0.0   | Soluble only | 187 | 0  |
| ≥ 2 unique peptides | rmAC2480 | Q5UZL8_HALMA     | <i>act</i>       | Acyl-CoA thioester hydrolase                                                                                                                                                                         | 0 | 0 | 0 | 0 | 0 | 0 | 2 | 2 | 0 | 2 | 2 | 0.0 | 1.2 only   | 0 | 2 | 0.0   | Soluble only | 146 | 0  |
| ≥ 2 unique peptides | rmAC0628 | Q5V4B6_HALMA     | <i>sun</i>       | TRNA and rRNA cytosine-C5-methylases                                                                                                                                                                 | 0 | 0 | 0 | 0 | 0 | 0 | 2 | 2 | 0 | 2 | 2 | 0.0 | 1.2 only   | 0 | 2 | 0.0   | Soluble only | 318 | 0  |
| ≥ 2 unique peptides | rmAC0453 | Q5V4R8_HALMA     | <i>arg1</i>      | Arginase (EC 3.5.3.1)                                                                                                                                                                                | 0 | 0 | 0 | 0 | 0 | 0 | 2 | 2 | 0 | 2 | 2 | 0.0 | 1.2 only   | 0 | 2 | 0.0   | Soluble only | 304 | 0  |
| ≥ 2 unique peptides | rmAC0078 | Q5V5P5_HALMA     | <i>argB1</i>     | Acetylglutamate kinase (EC 2.7.2.8)                                                                                                                                                                  | 0 | 0 | 0 | 0 | 0 | 0 | 2 | 2 | 0 | 2 | 2 | 0.0 | 1.2 only   | 0 | 2 | 0.0   | Soluble only | 250 | 0  |
| ≥ 2 unique peptides | rmAC2170 | Q5V0E0_HALMA     | <i>pepB4</i>     | Aminopeptidase                                                                                                                                                                                       | 0 | 0 | 0 | 0 | 0 | 0 | 2 | 2 | 0 | 2 | 2 | 0.0 | 1.2 only   | 0 | 2 | 0.0   | Soluble only | 442 | 0  |
| ≥ 2 unique peptides | rmAC0864 | Q5V3Q7_HALMA     | <i>nop56/58</i>  | Archaeal nucleolar protein-like                                                                                                                                                                      | 0 | 0 | 0 | 0 | 0 | 0 | 2 | 2 | 0 | 2 | 2 | 0.0 | 1.2 only   | 0 | 2 | 0.0   | Soluble only | 280 | 0  |
| ≥ 2 unique peptides | pNG7235  | Q5V6B6_HALMA     | <i>erm1</i>      | Endoribonuclease L-PSP                                                                                                                                                                               | 0 | 0 | 0 | 0 | 0 | 0 | 2 | 2 | 0 | 2 | 2 | 0.0 | 1.2 only   | 0 | 2 | 0.0   | Soluble only | 126 | 0  |
| ≥ 2 unique peptides | rmAC2359 | Q5UZX5_HALMA     | <i>usp16</i>     | Universal stress protein                                                                                                                                                                             | 0 | 0 | 0 | 0 | 2 | 2 | 0 | 0 | 0 | 2 | 2 | 0.0 | 1.2 only   | 2 | 0 | 100.0 | Memb only    | 59  | 0  |
| ≥ 2 unique peptides | rmB0291  | Q5UW94_HALMA     | <i>usp27</i>     | Universal stress protein                                                                                                                                                                             | 0 | 0 | 0 | 0 | 0 | 0 | 2 | 2 | 0 | 2 | 2 | 0.0 | 1.2 only   | 0 | 2 | 0.0   | Soluble only | 279 | 0  |
| ≥ 2 unique peptides | rmAC2868 | Q5UYN5_HALMA     | <i>potD2</i>     | Spermidine/putrescine ABC transporter spermidine/putrescine bindingprotein                                                                                                                           | 2 | 2 | 0 | 0 | 0 | 0 | 0 | 0 | 2 | 0 | 2 | ∞   | 0.7 only   | 2 | 0 | 100.0 | Memb only    | 357 | 1  |

|                     |          |                   |                 |                                                                       |    |   |    |   |    |   |    |   |   |    |    |    |          |                    |    |       |           |                     |     |    |
|---------------------|----------|-------------------|-----------------|-----------------------------------------------------------------------|----|---|----|---|----|---|----|---|---|----|----|----|----------|--------------------|----|-------|-----------|---------------------|-----|----|
| ≥ 2 unique peptides | rmAC2244 | Q5V078_HALMA      | <i>rmAC2244</i> | Putative ZIP domain zinc transporter                                  | 2  | 2 | 0  | 0 | 0  | 0 | 0  | 0 | 0 | 0  | 2  | ∞  | 0.7 only | 2                  | 0  | 100.0 | Memb only | 284                 | 7   |    |
| ≥ 2 unique peptides | rmAC1860 | Q5V159_HALMA      | <i>rmAC1860</i> | Sugar transporter                                                     | 2  | 2 | 0  | 0 | 0  | 0 | 0  | 0 | 0 | 2  | 0  | 2  | ∞        | 0.7 only           | 2  | 0     | 100.0     | Memb only           | 378 | 10 |
| ≥ 2 unique peptides | rmAC0029 | Q5V5U0_HALMA      | <i>rmAC0029</i> | Sugar ABC transporter permease protein                                | 2  | 2 | 0  | 0 | 0  | 0 | 0  | 0 | 0 | 2  | 0  | 2  | ∞        | 0.7 only           | 2  | 0     | 100.0     | Memb only           | 354 | 6  |
| ≥ 2 unique peptides | rmAC3118 | Q5UY25_HALMA      | <i>dpa</i>      | Signal recognition particle receptor                                  | 0  | 0 | 2  | 2 | 0  | 0 | 0  | 0 | 0 | 2  | 0  | 2  | ∞        | 0.7 only           | 0  | 2     | 0.0       | Soluble only        | 429 | 0  |
| single hit          |          | Q5UZ22_HALMA      | <i>cspD3</i>    | Cold shock protein                                                    | 0  | 0 | 50 | 1 | 0  | 0 | 12 | 1 | 0 | 50 | 12 | 62 | 4.2      | 0.7 (>3X)          | 0  | 62    | 0.0       | Soluble only        | 64  | 0  |
| single hit          |          | Q5V290_HALMA      | <i>atpC2</i>    | ATP synthase subunit C (EC 3.6.3.14)                                  | 8  | 1 | 0  | 0 | 45 | 1 | 0  | 0 | 0 | 8  | 45 | 53 | 0.2      | 1.2 (>3X)          | 53 | 0     | 100.0     | Memb only           | 115 | 2  |
| single hit          |          | Q5UWJ3_HALMA      | <i>rmB0173</i>  | Hypothetical protein                                                  | 16 | 1 | 0  | 0 | 7  | 1 | 0  | 0 | 0 | 16 | 7  | 23 | 2.3      | 0.7 (>3X)          | 23 | 0     | 100.0     | Memb only           | 132 | 3  |
| single hit          |          | Q5V0Z0_HALMA      | <i>rmAC1944</i> | Hypothetical protein                                                  | 10 | 1 | 0  | 0 | 7  | 1 | 0  | 0 | 0 | 10 | 7  | 17 | 1.4      | No dramatic change | 17 | 0     | 100.0     | Memb only           | 170 | 0  |
| single hit          |          | Q5V2E6_HALMA      | <i>hcp6</i>     | Halocyanin-like                                                       | 8  | 1 | 0  | 0 | 8  | 1 | 0  | 0 | 0 | 8  | 8  | 16 | 1.0      | No dramatic change | 16 | 0     | 100.0     | Memb only           | 258 | 0  |
| single hit          |          | Q5V729_HALMA      | <i>pNG6066</i>  | Hypothetical protein                                                  | 7  | 1 | 0  | 0 | 8  | 1 | 0  | 0 | 0 | 7  | 8  | 15 | 0.9      | No dramatic change | 15 | 0     | 100.0     | Memb only           | 61  | 2  |
| single hit          |          | Q5UXM6_HALMA      | <i>rmAC3283</i> | Hypothetical protein                                                  | 7  | 1 | 0  | 0 | 7  | 1 | 1  | 1 | 1 | 8  | 8  | 15 | 0.9      | No dramatic change | 14 | 1     | 93.3      | Memb predominant    | 258 | 2  |
| single hit          |          | Q5V0H2_HALMA      | <i>rmAC2136</i> | Hypothetical protein                                                  | 8  | 1 | 0  | 0 | 6  | 1 | 0  | 0 | 0 | 8  | 6  | 14 | 1.3      | No dramatic change | 14 | 0     | 100.0     | Memb only           | 410 | 9  |
| single hit          |          | Q5UX14_HALMA      | <i>hcp3</i>     | Halocyanin-like                                                       | 6  | 1 | 0  | 0 | 4  | 1 | 0  | 0 | 0 | 6  | 4  | 10 | 1.5      | No dramatic change | 10 | 0     | 100.0     | Memb only           | 219 | 1  |
| single hit          |          | UPPPP_HALMAReview | <i>uppP</i>     | Undecaprenyl-diphosphate (EC 3.6.1.27) (Undecaprenyl pyrophosphatase) | 6  | 1 | 0  | 0 | 4  | 1 | 0  | 0 | 0 | 6  | 4  | 10 | 1.5      | No dramatic change | 10 | 0     | 100.0     | Memb only           | 270 | 6  |
| single hit          |          | Q5V859_HALMA      | <i>pNG1001</i>  | Hypothetical protein                                                  | 5  | 1 | 0  | 0 | 5  | 1 | 0  | 0 | 0 | 5  | 5  | 10 | 1.0      | No dramatic change | 10 | 0     | 100.0     | Memb only           | 216 | 4  |
| single hit          |          | Q5UZC1_HALMA      | <i>arsA3</i>    | Arsenical pump-driving ATPase (EC 3.6.3.16)                           | 5  | 1 | 1  | 1 | 3  | 1 | 0  | 0 | 0 | 6  | 3  | 9  | 2.0      | 0.7 (>3X)          | 8  | 1     | 88.9      | Memb predominant    | 426 | 0  |
| single hit          |          | RS9_HALMAReview   | <i>rps9p</i>    | 30S ribosomal protein S9P (HmaS9) (HS3) (F1)                          | 1  | 1 | 5  | 1 | 1  | 1 | 2  | 1 | 0 | 6  | 3  | 9  | 2.0      | 0.7 (>3X)          | 2  | 7     | 22.2      | Soluble predominant | 132 | 0  |
| single hit          |          | Q5UXJ9_HALMA      | <i>rmAC3314</i> | Hypothetical protein                                                  | 5  | 1 | 0  | 0 | 4  | 1 | 0  | 0 | 0 | 5  | 4  | 9  | 1.3      | No dramatic change | 9  | 0     | 100.0     | Memb only           | 185 | 3  |
| single hit          |          | Q5V1D2_HALMA      | <i>rmAC1775</i> | Hypothetical protein                                                  | 5  | 1 | 0  | 0 | 4  | 1 | 0  | 0 | 0 | 5  | 4  | 9  | 1.3      | No dramatic change | 9  | 0     | 100.0     | Memb only           | 240 | 5  |
| single hit          |          | Q5V4H6_HALMA      | <i>usp14</i>    | Universal stress protein                                              | 0  | 0 | 4  | 1 | 0  | 0 | 5  | 1 | 0 | 4  | 5  | 9  | 0.8      | No dramatic change | 0  | 9     | 0.0       | Soluble only        | 150 | 0  |
| single hit          |          | Q5V3H5_HALMA      | <i>rmAC0956</i> | Hypothetical protein                                                  | 3  | 1 | 0  | 0 | 6  | 1 | 0  | 0 | 0 | 3  | 6  | 9  | 0.5      | 1.2 (2-3X)         | 9  | 0     | 100.0     | Memb only           | 178 | 2  |
| single hit          |          | Q5U260_HALMA      | <i>rmAC2665</i> | Hypothetical protein                                                  | 5  | 1 | 0  | 0 | 3  | 1 | 0  | 0 | 0 | 5  | 3  | 8  | 1.7      | No dramatic change | 8  | 0     | 100.0     | Memb only           | 324 | 10 |
| single hit          |          | Q5UYD1_HALMA      | <i>nirA2</i>    | Ferredoxin-nitrite reductase                                          | 0  | 0 | 5  | 1 | 0  | 0 | 3  | 1 | 0 | 5  | 3  | 8  | 1.7      | No dramatic change | 0  | 8     | 0.0       | Soluble only        | 587 | 0  |
| single hit          |          | Q5UXD3_HALMA      | <i>rmAC3388</i> | Hypothetical protein                                                  | 4  | 1 | 0  | 0 | 4  | 1 | 0  | 0 | 0 | 4  | 4  | 8  | 1.0      | No dramatic change | 8  | 0     | 100.0     | Memb only           | 202 | 2  |
| single hit          |          | Q5UWX0_HALMA      | <i>rmB0019</i>  | Hypothetical protein                                                  | 5  | 1 | 0  | 0 | 2  | 1 | 0  | 0 | 0 | 5  | 2  | 7  | 2.5      | 0.7 (>3X)          | 7  | 0     | 100.0     | Memb only           | 148 | 2  |
| single hit          |          | Q5V2P2_HALMA      | <i>asnC2</i>    | Transcription regulator AsnC family                                   | 0  | 0 | 5  | 1 | 0  | 0 | 2  | 1 | 0 | 5  | 2  | 7  | 2.5      | 0.7 (>3X)          | 0  | 7     | 0.0       | Soluble only        | 142 | 0  |
| single hit          |          | Q5UX88_HALMA      | <i>pch2</i>     | Potassium channel-like                                                | 3  | 1 | 0  | 0 | 4  | 1 | 0  | 0 | 0 | 3  | 4  | 7  | 0.8      | No dramatic change | 7  | 0     | 100.0     | Memb only           | 404 | 6  |
| single hit          |          | Q5UZ51_HALMA      | <i>argB2</i>    | Acetylglutamate kinase (EC 2.7.2.8)                                   | 0  | 0 | 3  | 1 | 0  | 0 | 4  | 1 | 0 | 3  | 4  | 7  | 0.8      | No dramatic change | 0  | 7     | 0.0       | Soluble only        | 286 | 0  |
| single hit          |          | Q5V569_HALMA      | <i>rmAC0277</i> | Hypothetical protein                                                  | 2  | 1 | 0  | 0 | 5  | 1 | 0  | 0 | 0 | 2  | 5  | 7  | 0.4      | 1.2 (2-3X)         | 7  | 0     | 100.0     | Memb only           | 206 | 6  |
| single hit          |          | Q5V0U6_HALMA      | <i>rmAC1994</i> | Hypothetical protein                                                  | 0  | 0 | 5  | 1 | 0  | 0 | 1  | 1 | 1 | 5  | 1  | 6  | 5.0      | 0.7 (>3X)          | 0  | 6     | 0.0       | Soluble only        | 111 | 0  |
| single hit          |          | Q5UX48_HALMA      | <i>rmAC3481</i> | Hypothetical protein                                                  | 4  | 1 | 0  | 0 | 2  | 1 | 0  | 0 | 0 | 4  | 2  | 6  | 2.0      | 0.7 (>3X)          | 6  | 0     | 100.0     | Memb only           | 106 | 2  |
| single hit          |          | Q5UYA5_HALMA      | <i>cbiX</i>     | Putative cobalamin biosynthesis protein                               | 0  | 0 | 4  | 1 | 0  | 0 | 2  | 1 | 0 | 4  | 2  | 6  | 2.0      | 0.7 (>3X)          | 0  | 6     | 0.0       | Soluble only        | 257 | 0  |
| single hit          |          | Q5V516_HALMA      | <i>rmAC0338</i> | Hypothetical protein                                                  | 0  | 0 | 4  | 1 | 0  | 0 | 2  | 1 | 0 | 2  | 2  | 6  | 2.0      | 0.7 (>3X)          | 0  | 6     | 0.0       | Soluble only        | 246 | 0  |
| single hit          |          | Q5V422_HALMA      | <i>rmAC0737</i> | Hypothetical protein                                                  | 3  | 1 | 0  | 0 | 3  | 1 | 0  | 0 | 0 | 3  | 3  | 6  | 1.0      | No dramatic change | 6  | 0     | 100.0     | Memb only           | 160 | 4  |
| single hit          |          | Q5V4S1_HALMA      | <i>yjID1</i>    | NADH dehydrogenase                                                    | 3  | 1 | 0  | 0 | 3  | 1 | 0  | 0 | 0 | 3  | 3  | 6  | 1.0      | No dramatic change | 6  | 0     | 100.0     | Memb only           | 389 | 0  |
| single hit          |          | RL18_HALMAReview  | <i>rpl18p</i>   | 50S ribosomal protein L18P (Hmal18) (H112)                            | 3  | 1 | 0  | 0 | 3  | 1 | 0  | 0 | 0 | 3  | 3  | 6  | 1.0      | No dramatic change | 6  | 0     | 100.0     | Memb only           | 187 | 0  |
| single hit          |          | Q5V4S3_HALMA      | <i>cdd</i>      | Cytidine deaminase (EC 3.5.4.5)                                       | 0  | 0 | 3  | 1 | 0  | 0 | 3  | 1 | 0 | 3  | 3  | 6  | 1.0      | No dramatic change | 0  | 6     | 0.0       | Soluble only        | 128 | 0  |
| single hit          |          | Q5V6P4_HALMA      | <i>pNG7095</i>  | Hypothetical protein                                                  | 0  | 0 | 3  | 1 | 0  | 0 | 3  | 1 | 0 | 3  | 3  | 6  | 1.0      | No dramatic change | 0  | 6     | 0.0       | Soluble only        | 150 | 0  |
| single hit          |          | Q5UZ08_HALMA      | <i>rmAC2730</i> | Hypothetical protein                                                  | 2  | 1 | 0  | 0 | 4  | 1 | 0  | 0 | 0 | 2  | 4  | 6  | 0.5      | 1.2 (2-3X)         | 6  | 0     | 100.0     | Memb only           | 171 | 3  |
| single hit          |          | Q5V279_HALMA      | <i>nolB</i>     | NAD(P)H-quinone oxidoreductase chain 3 (EC 1.6.5.-)                   | 2  | 1 | 0  | 0 | 4  | 1 | 0  | 0 | 0 | 2  | 4  | 6  | 0.5      | 1.2 (2-3X)         | 6  | 0     | 100.0     | Memb only           | 177 | 3  |
| single hit          |          | Q5V6S1_HALMA      | <i>cat1</i>     | Cationic amino acid transporter                                       | 1  | 1 | 0  | 0 | 5  | 1 | 0  | 0 | 0 | 1  | 5  | 6  | 0.2      | 1.2 (>3X)          | 6  | 0     | 100.0     | Memb only           | 476 | 12 |
| single hit          |          | Q5UX16_HALMA      | <i>dgs</i>      | Dolichol-P-glucose transferase                                        | 4  | 1 | 0  | 0 | 1  | 1 | 0  | 0 | 0 | 4  | 1  | 5  | 4.0      | 0.7 (>3X)          | 5  | 0     | 100.0     | Memb only           | 255 | 0  |
| single hit          |          | Q5UX94_HALMA      | <i>rmAC3430</i> | Hypothetical protein                                                  | 4  | 1 | 0  | 0 | 1  | 1 | 0  | 0 | 0 | 4  | 1  | 5  | 4.0      | 0.7 (>3X)          | 5  | 0     | 100.0     | Memb only           | 278 | 7  |
| single hit          |          | Q5UWF5_HALMA      | <i>npdG-2</i>   | F420-dependent NADP reductase                                         | 0  | 0 | 4  | 1 | 0  | 0 | 1  | 1 | 1 | 4  | 1  | 5  | 4.0      | 0.7 (>3X)          | 0  | 5     | 0.0       | Soluble only        | 223 | 0  |
| single hit          |          | Q5UY54_HALMA      | <i>rmAC3084</i> | Hypothetical protein                                                  | 3  | 1 | 0  | 0 | 2  | 1 | 0  | 0 | 0 | 3  | 2  | 5  | 1.5      | No dramatic change | 5  | 0     | 100.0     | Memb only           | 181 | 4  |
| single hit          |          | Q5V042_HALMA      | <i>rmAC2286</i> | Hypothetical protein                                                  | 3  | 1 | 0  | 0 | 2  | 1 | 0  | 0 | 0 | 3  | 2  | 5  | 1.5      | No dramatic change | 5  | 0     | 100.0     | Memb only           | 313 | 5  |
| single hit          |          | TRPD_HALMAReview  | <i>trpD</i>     | Anthranyl phosphoribosyltransferase (EC 2.4.2.18)                     | 1  | 1 | 2  | 1 | 0  | 0 | 2  | 1 | 0 | 3  | 2  | 5  | 1.5      | No dramatic change | 1  | 4     | 20.0      | Soluble predominant | 331 | 0  |
| single hit          |          | Q5V7B2_HALMA      | <i>pNG6172</i>  | Hypothetical protein                                                  | 0  | 0 | 3  | 1 | 0  | 0 | 2  | 1 | 0 | 3  | 2  | 5  | 1.5      | No dramatic change | 0  | 5     | 0.0       | Soluble only        | 166 | 0  |
| single hit          |          | Q5UZS9_HALMA      | <i>rmAC2411</i> | Hypothetical protein                                                  | 2  | 1 | 0  | 0 | 3  | 1 | 0  | 0 | 0 | 2  | 3  | 5  | 0.7      | No dramatic change | 5  | 0     | 100.0     | Memb only           | 137 | 1  |
| single hit          |          | Q5UZW8_HALMA      | <i>rmAC2368</i> | Hypothetical protein                                                  | 2  | 1 | 0  | 0 | 3  | 1 | 0  | 0 | 0 | 2  | 3  | 5  | 0.7      | No dramatic change | 5  | 0     | 100.0     | Memb only           | 344 | 8  |
| single hit          |          | Q5V4K5_HALMA      | <i>rmAC0527</i> | Hypothetical protein                                                  | 2  | 1 | 0  | 0 | 3  | 1 | 0  | 0 | 0 | 2  | 3  | 5  | 0.7      | No dramatic change | 5  | 0     | 100.0     | Memb only           | 150 | 3  |
| single hit          |          | Q5UZZ1_HALMA      | <i>rmAC2340</i> | Hypothetical protein                                                  | 0  | 0 | 2  | 1 | 0  | 0 | 3  | 1 | 0 | 2  | 3  | 5  | 0.7      | No dramatic change | 0  | 5     | 0.0       | Soluble only        | 246 | 0  |
| single hit          |          | Q5V2L1_HALMA      | <i>rmAC1305</i> | Hypothetical protein                                                  | 4  | 1 | 0  | 0 | 0  | 0 | 0  | 0 | 0 | 4  | 0  | 4  | ∞        | 0.7 only           | 4  | 0     | 100.0     | Memb only           | 132 | 0  |
| single hit          |          | Q5UWF1_HALMA      | <i>kdgR2</i>    | Transcription regulator KdgR                                          | 0  | 0 | 4  | 1 | 0  | 0 | 0  | 0 | 0 | 4  | 0  | 4  | ∞        | 0.7 only           | 0  | 4     | 0.0       | Soluble only        | 250 | 0  |
| single hit          |          | Q5V189_HALMA      | <i>rmAC1826</i> | Hypothetical protein                                                  | 0  | 0 | 4  | 1 | 0  | 0 | 0  | 0 | 0 | 4  | 0  | 4  | ∞        | 0.7 only           | 0  | 4     | 0.0       | Soluble only        | 78  | 0  |
| single hit          |          | Q5V679_HALMA      | <i>fluG1</i>    | Ferrichrome ABC transporter permease protein                          | 3  | 1 | 0  | 0 | 1  | 1 | 0  | 0 | 0 | 3  | 1  | 4  | 3.0      | 0.7 (>3X)          | 4  | 0     | 100.0     | Memb only           | 371 | 8  |
| single hit          |          | Q5UWK2_HALMA      | <i>rmB0163</i>  | Hypothetical protein                                                  | 0  | 0 | 3  | 1 | 0  | 0 | 1  | 1 | 1 | 3  | 1  | 4  | 3.0      | 0.7 (>3X)          | 0  | 4     | 0.0       | Soluble only        | 216 | 0  |
| single hit          |          | Q5V0L3_HALMA      | <i>rmAC2087</i> | Putative PUA domain RNA-binding protein                               | 0  | 0 | 3  | 1 | 0  | 0 | 1  | 1 | 1 | 3  | 1  |    |          |                    |    |       |           |                     |     |    |

|            |                    |                  |                                                                          |   |   |   |   |   |   |   |   |   |   |   |     |            |   |   |       |                  |      |    |
|------------|--------------------|------------------|--------------------------------------------------------------------------|---|---|---|---|---|---|---|---|---|---|---|-----|------------|---|---|-------|------------------|------|----|
| single hit | Q5UWE8_HALMA       | <i>livH-9</i>    | Branched-chain amino acid ABC transporter permease protein               | 1 | 1 | 0 | 0 | 3 | 1 | 0 | 0 | 1 | 3 | 4 | 0.3 | 1.2 (>3X)  | 4 | 0 | 100.0 | Memb only        | 674  | 16 |
| single hit | Q5V273_HALMA       | <i>rrmAC1453</i> | Hypothetical protein                                                     | 1 | 1 | 0 | 0 | 3 | 1 | 0 | 0 | 1 | 3 | 4 | 0.3 | 1.2 (>3X)  | 4 | 0 | 100.0 | Memb only        | 132  | 2  |
| single hit | Q5V2C4_HALMA       | <i>cyoC</i>      | Cytochrome c oxidase polypeptide III (EC 1.9.3.1)                        | 1 | 1 | 0 | 0 | 3 | 1 | 0 | 0 | 1 | 3 | 4 | 0.3 | 1.2 (>3X)  | 4 | 0 | 100.0 | Memb only        | 287  | 7  |
| single hit | Q5UXY9_HALMA       | <i>atpF</i>      | V-type ATP synthase subunit F (EC 3.6.3.14)                              | 1 | 1 | 0 | 0 | 2 | 1 | 1 | 1 | 1 | 3 | 4 | 0.3 | 1.2 (>3X)  | 3 | 1 | 75.0  | Memb predominant | 107  | 0  |
| single hit | Q5UXL0_HALMA       | <i>rrmAC3300</i> | Hypothetical protein                                                     | 0 | 0 | 1 | 1 | 0 | 0 | 3 | 1 | 1 | 3 | 4 | 0.3 | 1.2 (>3X)  | 0 | 4 | 0.0   | Soluble only     | 113  | 0  |
| single hit | Q5V023_HALMA       | <i>rrmAC2306</i> | Hypothetical protein                                                     | 0 | 0 | 1 | 1 | 0 | 0 | 3 | 1 | 1 | 3 | 4 | 0.3 | 1.2 (>3X)  | 0 | 4 | 0.0   | Soluble only     | 115  | 0  |
| single hit | Q5V3F6_HALMA       | <i>rrmAC0977</i> | Hypothetical protein                                                     | 0 | 0 | 1 | 1 | 0 | 0 | 3 | 1 | 1 | 3 | 4 | 0.3 | 1.2 (>3X)  | 0 | 4 | 0.0   | Soluble only     | 162  | 0  |
| single hit | Q5V4L0_HALMA       | <i>bcp-1</i>     | Peroxisredoxin                                                           | 0 | 0 | 1 | 1 | 0 | 0 | 3 | 1 | 1 | 3 | 4 | 0.3 | 1.2 (>3X)  | 0 | 4 | 0.0   | Soluble only     | 155  | 0  |
| single hit | Q5UZL5_HALMA       | <i>rrmAC2483</i> | Hypothetical protein                                                     | 0 | 0 | 0 | 0 | 0 | 0 | 4 | 1 | 1 | 4 | 4 | 0.0 | 1.2 only   | 0 | 4 | 0.0   | Soluble only     | 218  | 0  |
| single hit | Q5V1E1_HALMA       | <i>rrmAC1764</i> | HITH DNA-binding protein                                                 | 0 | 0 | 0 | 0 | 0 | 0 | 4 | 1 | 1 | 4 | 4 | 0.0 | 1.2 only   | 0 | 4 | 0.0   | Soluble only     | 325  | 0  |
| single hit | Q5UZ44_HALMA       | <i>rrmAC2685</i> | Hypothetical protein                                                     | 3 | 1 | 0 | 0 | 0 | 0 | 0 | 0 | 3 | 0 | 3 | ∞   | 0.7 only   | 3 | 0 | 100.0 | Memb only        | 364  | 1  |
| single hit | Q5V128_HALMA       | <i>rrmAC1899</i> | Hypothetical protein                                                     | 0 | 0 | 3 | 1 | 0 | 0 | 0 | 0 | 3 | 0 | 3 | ∞   | 0.7 only   | 0 | 3 | 0.0   | Soluble only     | 396  | 0  |
| single hit | Q5V5U2_HALMA       | <i>hat7</i>      | Putative acetyltransferase                                               | 0 | 0 | 3 | 1 | 0 | 0 | 0 | 0 | 3 | 0 | 3 | ∞   | 0.7 only   | 0 | 3 | 0.0   | Soluble only     | 167  | 0  |
| single hit | Q5V6R3_HALMA       | <i>fabG7</i>     | 3-oxoacyl-[acyl-carrier protein] reductase 1 (EC 1.1.1.100)              | 0 | 0 | 3 | 1 | 0 | 0 | 0 | 0 | 3 | 0 | 3 | ∞   | 0.7 only   | 0 | 3 | 0.0   | Soluble only     | 221  | 0  |
| single hit | Q5UWZ6_HALMA       | <i>rrmAC3541</i> | Hypothetical protein                                                     | 2 | 1 | 0 | 0 | 1 | 1 | 0 | 0 | 2 | 1 | 3 | 2.0 | 0.7 (2-3X) | 3 | 0 | 100.0 | Memb only        | 409  | 0  |
| single hit | Q5UY66_HALMA       | <i>tatC1</i>     | Sec-independent protein translocase protein TatC                         | 2 | 1 | 0 | 0 | 1 | 1 | 0 | 0 | 2 | 1 | 3 | 2.0 | 0.7 (2-3X) | 3 | 0 | 100.0 | Memb only        | 745  | 14 |
| single hit | Q5UZ59_HALMA       | <i>rrmAC2666</i> | Hypothetical protein                                                     | 2 | 1 | 0 | 0 | 1 | 1 | 0 | 0 | 2 | 1 | 3 | 2.0 | 0.7 (2-3X) | 3 | 0 | 100.0 | Memb only        | 185  | 0  |
| single hit | Q5V046_HALMA       | <i>cbiM</i>      | Cobalamin biosynthesis protein CbiM                                      | 2 | 1 | 0 | 0 | 1 | 1 | 0 | 0 | 2 | 1 | 3 | 2.0 | 0.7 (2-3X) | 3 | 0 | 100.0 | Memb only        | 212  | 6  |
| single hit | Q5V0G9_HALMA       | <i>sdr2</i>      | Oxidoreductase short-chain dehydrogenase/reductase family                | 2 | 1 | 0 | 0 | 1 | 1 | 0 | 0 | 2 | 1 | 3 | 2.0 | 0.7 (2-3X) | 3 | 0 | 100.0 | Memb only        | 313  | 0  |
| single hit | Q5V254_HALMA       | <i>rrmAC1473</i> | Hypothetical protein                                                     | 2 | 1 | 0 | 0 | 1 | 1 | 0 | 0 | 2 | 1 | 3 | 2.0 | 0.7 (2-3X) | 3 | 0 | 100.0 | Memb only        | 115  | 1  |
| single hit | Q5V2H7_HALMA       | <i>rrmAC1344</i> | Hypothetical protein                                                     | 2 | 1 | 0 | 0 | 1 | 1 | 0 | 0 | 2 | 1 | 3 | 2.0 | 0.7 (2-3X) | 3 | 0 | 100.0 | Memb only        | 91   | 0  |
| single hit | Q5V3S5_HALMA       | <i>menA</i>      | 14-dihydroxy-2-naphthoate octaprenyltransferase                          | 2 | 1 | 0 | 0 | 1 | 1 | 0 | 0 | 2 | 1 | 3 | 2.0 | 0.7 (2-3X) | 3 | 0 | 100.0 | Memb only        | 319  | 7  |
| single hit | Q5V7M8_HALMA       | <i>pNG5078</i>   | Hypothetical protein                                                     | 2 | 1 | 0 | 0 | 1 | 1 | 0 | 0 | 2 | 1 | 3 | 2.0 | 0.7 (2-3X) | 3 | 0 | 100.0 | Memb only        | 628  | 2  |
| single hit | Q5UW56_HALMA       | <i>parA5</i>     | ParA/minD-like bacterial cell division regulator                         | 1 | 1 | 1 | 1 | 0 | 0 | 1 | 1 | 2 | 1 | 3 | 2.0 | 0.7 (2-3X) | 1 | 2 | 33.3  | Memb + Sol       | 334  | 0  |
| single hit | Q5V3Y2_HALMA       | <i>usp30</i>     | Universal stress protein                                                 | 1 | 1 | 1 | 1 | 0 | 0 | 1 | 1 | 2 | 1 | 3 | 2.0 | 0.7 (2-3X) | 1 | 2 | 33.3  | Memb + Sol       | 138  | 0  |
| single hit | CDC69_HALMARReview | <i>cdc6-9</i>    | Cell division control protein 6 homolog 9 (CDC6 homolog 9)               | 0 | 0 | 2 | 1 | 0 | 0 | 1 | 1 | 2 | 1 | 3 | 2.0 | 0.7 (2-3X) | 0 | 3 | 0.0   | Soluble only     | 408  | 0  |
| single hit | GCP_HALMARReview   | <i>gcp</i>       | Putative O-sialoglycoprotein endopeptidase (EC 3.4.24.57)(Glycoprotease) | 0 | 0 | 2 | 1 | 0 | 0 | 1 | 1 | 2 | 1 | 3 | 2.0 | 0.7 (2-3X) | 0 | 3 | 0.0   | Soluble only     | 548  | 0  |
| single hit | Q5UZ54_HALMA       | <i>arcB</i>      | Ornithine carbamoyltransferase (EC 2.1.3.3)                              | 0 | 0 | 2 | 1 | 0 | 0 | 1 | 1 | 2 | 1 | 3 | 2.0 | 0.7 (2-3X) | 0 | 3 | 0.0   | Soluble only     | 298  | 0  |
| single hit | Q5UZD6_HALMA       | <i>manB1</i>     | Phosphoglucomutase/phosphomannomutase (EC 5.4.2.2) (EC 5.4.2.8)          | 0 | 0 | 2 | 1 | 0 | 0 | 1 | 1 | 2 | 1 | 3 | 2.0 | 0.7 (2-3X) | 0 | 3 | 0.0   | Soluble only     | 450  | 0  |
| single hit | Q5V176_HALMA       | <i>yhcR2</i>     | Phosphoesterase                                                          | 0 | 0 | 2 | 1 | 0 | 0 | 1 | 1 | 2 | 1 | 3 | 2.0 | 0.7 (2-3X) | 0 | 3 | 0.0   | Soluble only     | 424  | 0  |
| single hit | Q5V415_HALMA       | <i>rrmAC0744</i> | Hypothetical protein                                                     | 0 | 0 | 2 | 1 | 0 | 0 | 1 | 1 | 2 | 1 | 3 | 2.0 | 0.7 (2-3X) | 0 | 3 | 0.0   | Soluble only     | 488  | 0  |
| single hit | Q5V462_HALMA       | <i>aspC4</i>     | Aspartate aminotransferase (EC 2.6.1.1)                                  | 0 | 0 | 2 | 1 | 0 | 0 | 1 | 1 | 2 | 1 | 3 | 2.0 | 0.7 (2-3X) | 0 | 3 | 0.0   | Soluble only     | 372  | 0  |
| single hit | Q5V4A9_HALMA       | <i>gloA2</i>     | Lactoylglutathione lyase and related lyases                              | 0 | 0 | 2 | 1 | 0 | 0 | 1 | 1 | 2 | 1 | 3 | 2.0 | 0.7 (2-3X) | 0 | 3 | 0.0   | Soluble only     | 129  | 0  |
| single hit | Q5V4P2_HALMA       | <i>yqjF</i>      | Hypothetical protein yqjF                                                | 0 | 0 | 2 | 1 | 0 | 0 | 1 | 1 | 2 | 1 | 3 | 2.0 | 0.7 (2-3X) | 0 | 3 | 0.0   | Soluble only     | 234  | 0  |
| single hit | Q5V4U2_HALMA       | <i>rrmAC0426</i> | Putative sulfatase                                                       | 0 | 0 | 2 | 1 | 0 | 0 | 1 | 1 | 2 | 1 | 3 | 2.0 | 0.7 (2-3X) | 0 | 3 | 0.0   | Soluble only     | 487  | 0  |
| single hit | Q5V6U4_HALMA       | <i>trh2</i>      | Transcription regulator                                                  | 0 | 0 | 2 | 1 | 0 | 0 | 1 | 1 | 2 | 1 | 3 | 2.0 | 0.7 (2-3X) | 0 | 3 | 0.0   | Soluble only     | 157  | 0  |
| single hit | RL11_HALMARReview  | <i>rpl11p</i>    | 50S ribosomal protein L11P (Hmal11)                                      | 0 | 0 | 2 | 1 | 0 | 0 | 1 | 1 | 2 | 1 | 3 | 2.0 | 0.7 (2-3X) | 0 | 3 | 0.0   | Soluble only     | 162  | 0  |
| single hit | Q5UWM0_HALMA       | <i>rrmB0138</i>  | Hypothetical protein                                                     | 1 | 1 | 0 | 0 | 2 | 1 | 0 | 0 | 1 | 2 | 3 | 0.5 | 1.2 (2-3X) | 3 | 0 | 100.0 | Memb only        | 98   | 3  |
| single hit | Q5UX01_HALMA       | <i>mmhG2</i>     | Multisubunit Na+/H+ antiporter MmhG subunit                              | 1 | 1 | 0 | 0 | 2 | 1 | 0 | 0 | 1 | 2 | 3 | 0.5 | 1.2 (2-3X) | 3 | 0 | 100.0 | Memb only        | 106  | 2  |
| single hit | Q5UY99_HALMA       | <i>rrmAC3030</i> | Hypothetical protein                                                     | 1 | 1 | 0 | 0 | 2 | 1 | 0 | 0 | 1 | 2 | 3 | 0.5 | 1.2 (2-3X) | 3 | 0 | 100.0 | Memb only        | 1150 | 2  |
| single hit | Q5V494_HALMA       | <i>rrmAC0654</i> | Hypothetical protein                                                     | 1 | 1 | 0 | 0 | 2 | 1 | 0 | 0 | 1 | 2 | 3 | 0.5 | 1.2 (2-3X) | 3 | 0 | 100.0 | Memb only        | 205  | 5  |
| single hit | Q5V518_HALMA       | <i>nhaC2</i>     | Na+/H+ antiporter                                                        | 1 | 1 | 0 | 0 | 2 | 1 | 0 | 0 | 1 | 2 | 3 | 0.5 | 1.2 (2-3X) | 3 | 0 | 100.0 | Memb only        | 491  | 10 |
| single hit | Q5V0L9_HALMA       | <i>rrmAC2081</i> | Hypothetical protein                                                     | 1 | 1 | 0 | 0 | 1 | 1 | 1 | 1 | 1 | 2 | 3 | 0.5 | 1.2 (2-3X) | 2 | 1 | 66.7  | Memb + Sol       | 282  | 0  |
| single hit | Q5UXP3_HALMA       | <i>rrmAC3264</i> | Putative molybdenum-binding protein                                      | 0 | 0 | 1 | 1 | 0 | 0 | 2 | 1 | 1 | 2 | 3 | 0.5 | 1.2 (2-3X) | 0 | 3 | 0.0   | Soluble only     | 242  | 0  |
| single hit | Q5UZ95_HALMA       | <i>cheA2</i>     | CHEA histidine kinase                                                    | 0 | 0 | 1 | 1 | 0 | 0 | 2 | 1 | 1 | 2 | 3 | 0.5 | 1.2 (2-3X) | 0 | 3 | 0.0   | Soluble only     | 214  | 0  |
| single hit | Q5V0L2_HALMA       | <i>rrmAC2088</i> | Hypothetical protein                                                     | 0 | 0 | 1 | 1 | 0 | 0 | 2 | 1 | 1 | 2 | 3 | 0.5 | 1.2 (2-3X) | 0 | 3 | 0.0   | Soluble only     | 303  | 0  |
| single hit | Q5V0S0_HALMA       | <i>mstA1</i>     | Peptide methionine sulfoxide reductase MstA (EC 1.8.4.6)                 | 0 | 0 | 1 | 1 | 0 | 0 | 2 | 1 | 1 | 2 | 3 | 0.5 | 1.2 (2-3X) | 0 | 3 | 0.0   | Soluble only     | 177  | 0  |
| single hit | Q5V235_HALMA       | <i>hitD</i>      | HTR-like protein                                                         | 0 | 0 | 1 | 1 | 0 | 0 | 2 | 1 | 1 | 2 | 3 | 0.5 | 1.2 (2-3X) | 0 | 3 | 0.0   | Soluble only     | 122  | 0  |
| single hit | Q5V2L8_HALMA       | <i>moeA2</i>     | Molybdopterin biosynthesis protein moeA                                  | 0 | 0 | 1 | 1 | 0 | 0 | 2 | 1 | 1 | 2 | 3 | 0.5 | 1.2 (2-3X) | 0 | 3 | 0.0   | Soluble only     | 407  | 0  |
| single hit | Q5V3L3_HALMA       | <i>trmB1</i>     | Sugar-specific transcriptional regulator TrmB                            | 0 | 0 | 1 | 1 | 0 | 0 | 2 | 1 | 1 | 2 | 3 | 0.5 | 1.2 (2-3X) | 0 | 3 | 0.0   | Soluble only     | 350  | 0  |
| single hit | Q5V547_HALMA       | <i>rrmAC0300</i> | Hypothetical protein                                                     | 0 | 0 | 1 | 1 | 0 | 0 | 2 | 1 | 1 | 2 | 3 | 0.5 | 1.2 (2-3X) | 0 | 3 | 0.0   | Soluble only     | 239  | 0  |
| single hit | Q5V860_HALMA       | <i>pNG1006</i>   | Hypothetical protein                                                     | 0 | 0 | 1 | 1 | 0 | 0 | 2 | 1 | 1 | 2 | 3 | 0.5 | 1.2 (2-3X) | 0 | 3 | 0.0   | Soluble only     | 181  | 0  |
| single hit | Q5V215_HALMA       | <i>rrmAC1335</i> | Hypothetical protein                                                     | 0 | 0 | 0 | 0 | 3 | 1 | 0 | 0 | 0 | 3 | 3 | 0.0 | 1.2 only   | 3 | 0 | 100.0 | Memb only        | 346  | 6  |
| single hit | Q5V059_HALMA       | <i>rrmAC2265</i> | Hypothetical protein                                                     | 0 | 0 | 0 | 0 | 0 | 0 | 3 | 1 | 0 | 3 | 3 | 0.0 | 1.2 only   | 0 | 3 | 0.0   | Soluble only     | 224  | 0  |
| single hit | Q5V1A8_HALMA       | <i>hitD</i>      | Sensor protein (EC 2.7.13.3)                                             | 0 | 0 | 0 | 0 | 0 | 0 | 3 | 1 | 0 | 3 | 3 | 0.0 | 1.2 only   | 0 | 3 | 0.0   | Soluble only     | 626  | 0  |
| single hit | Q5V3L4_HALMA       | <i>rrmAC0913</i> | Hypothetical protein                                                     | 0 | 0 | 0 | 0 | 0 | 0 | 3 | 1 | 0 | 3 | 3 | 0.0 | 1.2 only   | 0 | 3 | 0.0   | Soluble only     | 258  | 0  |
| single hit | Q5V519_HALMA       | <i>sdhA2</i>     | Succinate dehydrogenase flavoprotein subunit (EC 1.3.99.1)               | 0 | 0 | 0 | 0 | 0 | 0 | 3 | 1 | 0 | 3 | 3 | 0.0 | 1.2 only   | 0 | 3 | 0.0   | Soluble only     | 607  | 0  |
| single hit | Q5V5Y3_HALMA       | <i>folP2</i>     | Dihydropterolate synthase (EC 2.5.1.15)                                  | 0 | 0 | 0 | 0 | 0 | 0 | 3 | 1 | 0 | 3 | 3 | 0.0 | 1.2 only   | 0 | 3 | 0.0   | Soluble only     | 799  | 0  |
| single hit | Q5UWR3_HALMA       | <i>rrmB0084</i>  | Hypothetical protein                                                     | 2 | 1 | 0 | 0 | 0 | 0 | 0 | 0 | 0 | 0 | 2 | ∞   | 0.7 only   | 2 | 0 | 100.0 | Memb only        | 116  | 0  |
| single hit | Q5UWV5_HALMA       | <i>nadC2</i>     | Sodium dependent transporter                                             | 2 | 1 | 0 | 0 | 0 | 0 | 0 | 0 | 0 | 2 | 2 | ∞   | 0.7 only   | 2 | 0 | 100.0 | Memb only        | 538  | 13 |
| single hit | Q5UX79_HALMA       | <i>rrmAC3446</i> | Hypothetical protein                                                     | 2 | 1 | 0 | 0 | 0 | 0 | 0 | 0 | 0 | 2 | 2 | ∞   | 0.7 only   | 2 | 0 | 100.0 | Memb only        | 521  | 12 |
| single hit | Q5UZ75_HALMA       | <i>rrmAC2647</i> | Hypothetical protein                                                     | 2 | 1 | 0 | 0 | 0 | 0 | 0 | 0 | 0 | 0 | 2 | ∞   | 0.7 only   | 2 | 0 | 100.0 | Memb only        | 234  | 5  |
| single hit | Q5UZC6_HALMA       | <i>rrmAC2586</i> | Phosphate transporter family protein                                     | 2 | 1 | 0 | 0 | 0 | 0 | 0 | 0 | 0 | 2 | 2 | ∞   | 0.7 only   | 2 | 0 | 100.0 | Memb only        | 354  | 11 |
| single hit | Q5V047_HALMA       | <i>rrmAC2281</i> | Hypothetical protein                                                     | 2 | 1 | 0 | 0 | 0 | 0 | 0 | 0 | 0 | 2 | 2 | ∞   | 0.7 only   | 2 | 0 | 100.0 | Memb only        | 105  | 2  |
| single hit | Q5V0L4_HALMA       | <i>rrmAC2086</i> | Hypothetical protein                                                     | 2 | 1 | 0 | 0 | 0 | 0 | 0 | 0 | 0 | 2 | 2 | ∞   | 0.7 only   | 2 | 0 | 100.0 | Memb only        | 139  | 4  |
| single hit | Q5V272_HALMA       | <i>nolC</i>      | NADH dehydrogenase/oxidoreductase-like protein                           | 2 | 1 | 0 | 0 | 0 | 0 | 0 | 0 | 0 | 2 | 2 | ∞   | 0.7 only   | 2 | 0 | 100.0 | Memb only        | 68   | 1  |
| single hit | Q5V2Z6_HALMA       | <i>rrmAC1155</i> | Hypothetical protein                                                     | 2 | 1 | 0 | 0 | 0 | 0 | 0 | 0 | 0 | 2 | 2 | ∞   | 0.7 only   | 2 | 0 | 100.0 | Memb only        | 182  | 1  |
| single hit | Q5V4N6_HALMA       | <i>rrmAC0492</i> | Hypothetical protein                                                     | 2 | 1 | 0 | 0 | 0 | 0 | 0 | 0 | 0 | 2 | 2 | ∞   | 0.7 only   | 2 | 0 | 100.0 | Memb only        | 56   | 1  |
| single hit | Q5V4P6_HALMA       | <i>rrmAC0481</i> | Hypothetical protein                                                     | 2 | 1 | 0 | 0 | 0 | 0 |   |   |   |   |   |     |            |   |   |       |                  |      |    |





|            |                    |                 |                                                                        |   |   |   |   |   |   |   |   |   |   |   |     |          |   |   |       |              |     |    |
|------------|--------------------|-----------------|------------------------------------------------------------------------|---|---|---|---|---|---|---|---|---|---|---|-----|----------|---|---|-------|--------------|-----|----|
| single hit | Q5V5G2_HALMA       | <i>glhA</i>     | Glycerol-1-phosphate dehydrogenase [NAD(P)] (EC 1.1.1.6)(EC 1.1.1.261) | 0 | 0 | 0 | 0 | 0 | 0 | 2 | 1 | 0 | 2 | 2 | 0.0 | 1.2 only | 0 | 2 | 0.0   | Soluble only | 352 | 0  |
| single hit | Q5V5L4_HALMA       | <i>pal1</i>     | Sporulation regulator-like                                             | 0 | 0 | 0 | 0 | 0 | 0 | 2 | 1 | 0 | 2 | 2 | 0.0 | 1.2 only | 0 | 2 | 0.0   | Soluble only | 148 | 0  |
| single hit | Q5V607_HALMA       | <i>adh13</i>    | Zinc-binding dehydrogenase (EC 1.1.1.1) (EC 1.6.5.5)                   | 0 | 0 | 0 | 0 | 0 | 0 | 2 | 1 | 0 | 2 | 2 | 0.0 | 1.2 only | 0 | 2 | 0.0   | Soluble only | 362 | 0  |
| single hit | Q5V607_HALMA       | <i>trxB1</i>    | Thioredoxin reductase (EC 1.8.1.9)                                     | 0 | 0 | 0 | 0 | 0 | 0 | 2 | 1 | 0 | 2 | 2 | 0.0 | 1.2 only | 0 | 2 | 0.0   | Soluble only | 413 | 0  |
| single hit | Q5V704_HALMA       | <i>pNG6001</i>  | Hypothetical protein                                                   | 0 | 0 | 0 | 0 | 0 | 0 | 2 | 1 | 0 | 2 | 2 | 0.0 | 1.2 only | 0 | 2 | 0.0   | Soluble only | 187 | 0  |
| single hit | Q5V845_HALMA       | <i>sojC</i>     | Chromosome partitioning protein                                        | 0 | 0 | 0 | 0 | 0 | 0 | 2 | 1 | 0 | 2 | 2 | 0.0 | 1.2 only | 0 | 2 | 0.0   | Soluble only | 255 | 0  |
| single hit | Y1612_HALMARReview | <i>rnaC1612</i> | Uncharacterized protein rnaC1612                                       | 0 | 0 | 0 | 0 | 0 | 0 | 2 | 1 | 0 | 2 | 2 | 0.0 | 1.2 only | 0 | 2 | 0.0   | Soluble only | 281 | 0  |
| single hit | Q5UW97_HALMA       | <i>rmb0287</i>  | Hypothetical protein                                                   | 1 | 1 | 0 | 0 | 0 | 0 | 0 | 0 | 1 | 0 | 1 | ∞   | 0.7 only | 1 | 0 | 100.0 | Memb only    | 163 | 4  |
| single hit | Q5UWA7_HALMA       | <i>rmb0275</i>  | Putative-iron binding protein                                          | 1 | 1 | 0 | 0 | 0 | 0 | 0 | 0 | 1 | 0 | 1 | ∞   | 0.7 only | 1 | 0 | 100.0 | Memb only    | 354 | 0  |
| single hit | Q5UWV9_HALMA       | <i>rmb0030</i>  | Hypothetical protein                                                   | 1 | 1 | 0 | 0 | 0 | 0 | 0 | 0 | 1 | 0 | 1 | ∞   | 0.7 only | 1 | 0 | 100.0 | Memb only    | 409 | 1  |
| single hit | Q5UWZ5_HALMA       | <i>rmaC3542</i> | Hypothetical protein                                                   | 1 | 1 | 0 | 0 | 0 | 0 | 0 | 0 | 1 | 0 | 1 | ∞   | 0.7 only | 1 | 0 | 100.0 | Memb only    | 247 | 2  |
| single hit | Q5UX30_HALMA       | <i>rmaC3504</i> | Flavin-containing amine-oxidoreductase                                 | 1 | 1 | 0 | 0 | 0 | 0 | 0 | 0 | 1 | 0 | 1 | ∞   | 0.7 only | 1 | 0 | 100.0 | Memb only    | 417 | 0  |
| single hit | Q5UX62_HALMA       | <i>arsB</i>     | Arsenite transport protein                                             | 1 | 1 | 0 | 0 | 0 | 0 | 0 | 0 | 1 | 0 | 1 | ∞   | 0.7 only | 1 | 0 | 100.0 | Memb only    | 653 | 11 |
| single hit | Q5UX91_HALMA       | <i>rmaC3433</i> | Hypothetical protein                                                   | 1 | 1 | 0 | 0 | 0 | 0 | 0 | 0 | 1 | 0 | 1 | ∞   | 0.7 only | 1 | 0 | 100.0 | Memb only    | 73  | 2  |
| single hit | Q5UX98_HALMA       | <i>cef</i>      | Cation efflux system protein (Zinc/cadmium)                            | 1 | 1 | 0 | 0 | 0 | 0 | 0 | 0 | 1 | 0 | 1 | ∞   | 0.7 only | 1 | 0 | 100.0 | Memb only    | 304 | 6  |
| single hit | Q5UXU1_HALMA       | <i>rnaC3208</i> | Hypothetical protein                                                   | 1 | 1 | 0 | 0 | 0 | 0 | 0 | 0 | 1 | 0 | 1 | ∞   | 0.7 only | 1 | 0 | 100.0 | Memb only    | 380 | 11 |
| single hit | Q5UXX1_HALMA       | <i>rmaC3176</i> | Hypothetical protein                                                   | 1 | 1 | 0 | 0 | 0 | 0 | 0 | 0 | 1 | 0 | 1 | ∞   | 0.7 only | 1 | 0 | 100.0 | Memb only    | 415 | 8  |
| single hit | Q5UXZ6_HALMA       | <i>rmaC3150</i> | Hypothetical protein                                                   | 1 | 1 | 0 | 0 | 0 | 0 | 0 | 0 | 1 | 0 | 1 | ∞   | 0.7 only | 1 | 0 | 100.0 | Memb only    | 410 | 1  |
| single hit | Q5UY14_HALMA       | <i>livH-7</i>   | Branched-chain amino acid ABC transporter permease protein             | 1 | 1 | 0 | 0 | 0 | 0 | 0 | 0 | 1 | 0 | 1 | ∞   | 0.7 only | 1 | 0 | 100.0 | Memb only    | 214 | 4  |
| single hit | Q5UYK4_HALMA       | <i>rnaC2907</i> | Hypothetical protein                                                   | 1 | 1 | 0 | 0 | 0 | 0 | 0 | 0 | 1 | 0 | 1 | ∞   | 0.7 only | 1 | 0 | 100.0 | Memb only    | 205 | 0  |
| single hit | Q5UYP0_HALMA       | <i>rnaC2863</i> | Hypothetical protein                                                   | 1 | 1 | 0 | 0 | 0 | 0 | 0 | 0 | 1 | 0 | 1 | ∞   | 0.7 only | 1 | 0 | 100.0 | Memb only    | 285 | 0  |
| single hit | Q5UZ72_HALMA       | <i>rbsC</i>     | Ribose ABC transporter permease                                        | 1 | 1 | 0 | 0 | 0 | 0 | 0 | 0 | 1 | 0 | 1 | ∞   | 0.7 only | 1 | 0 | 100.0 | Memb only    | 354 | 9  |
| single hit | Q5UZ86_HALMA       | <i>rnaC2632</i> | Sodium symporter transmembrane region                                  | 1 | 1 | 0 | 0 | 0 | 0 | 0 | 0 | 1 | 0 | 1 | ∞   | 0.7 only | 1 | 0 | 100.0 | Memb only    | 469 | 14 |
| single hit | Q5UZS1_HALMA       | <i>bioY</i>     | Dethiobiotin synthesis protein                                         | 1 | 1 | 0 | 0 | 0 | 0 | 0 | 0 | 1 | 0 | 1 | ∞   | 0.7 only | 1 | 0 | 100.0 | Memb only    | 193 | 5  |
| single hit | Q5UZZ4_HALMA       | <i>rnaC2337</i> | Histidine kinase (EC 2.7.3.-)                                          | 1 | 1 | 0 | 0 | 0 | 0 | 0 | 0 | 1 | 0 | 1 | ∞   | 0.7 only | 1 | 0 | 100.0 | Memb only    | 409 | 4  |
| single hit | Q5V041_HALMA       | <i>rnaC2287</i> | Hypothetical protein                                                   | 1 | 1 | 0 | 0 | 0 | 0 | 0 | 0 | 1 | 0 | 1 | ∞   | 0.7 only | 1 | 0 | 100.0 | Memb only    | 177 | 3  |
| single hit | Q5V018_HALMA       | <i>rnaC2114</i> | Hypothetical protein                                                   | 1 | 1 | 0 | 0 | 0 | 0 | 0 | 0 | 1 | 0 | 1 | ∞   | 0.7 only | 1 | 0 | 100.0 | Memb only    | 468 | 1  |
| single hit | Q5V0L7_HALMA       | <i>yadH</i>     | ABC transporter permease protein                                       | 1 | 1 | 0 | 0 | 0 | 0 | 0 | 0 | 1 | 0 | 1 | ∞   | 0.7 only | 1 | 0 | 100.0 | Memb only    | 255 | 6  |
| single hit | Q5V1J6_HALMA       | <i>rnaC1700</i> | Sulfatase (EC 3.1.6.-)                                                 | 1 | 1 | 0 | 0 | 0 | 0 | 0 | 0 | 1 | 0 | 1 | ∞   | 0.7 only | 1 | 0 | 100.0 | Memb only    | 472 | 0  |
| single hit | Q5V1R6_HALMA       | <i>rnaC1621</i> | Hypothetical protein                                                   | 1 | 1 | 0 | 0 | 0 | 0 | 0 | 0 | 1 | 0 | 1 | ∞   | 0.7 only | 1 | 0 | 100.0 | Memb only    | 152 | 0  |
| single hit | Q5V282_HALMA       | <i>xup</i>      | Xanthine/uracil permease family protein                                | 1 | 1 | 0 | 0 | 0 | 0 | 0 | 0 | 1 | 0 | 1 | ∞   | 0.7 only | 1 | 0 | 100.0 | Memb only    | 581 | 12 |
| single hit | Q5V2B6_HALMA       | <i>cyo</i>      | Cytochrome oxidase subunit I-like                                      | 1 | 1 | 0 | 0 | 0 | 0 | 0 | 0 | 1 | 0 | 1 | ∞   | 0.7 only | 1 | 0 | 100.0 | Memb only    | 333 | 7  |
| single hit | Q5V2E8_HALMA       | <i>soxA2</i>    | Putative sulfite oxidase                                               | 1 | 1 | 0 | 0 | 0 | 0 | 0 | 0 | 1 | 0 | 1 | ∞   | 0.7 only | 1 | 0 | 100.0 | Memb only    | 509 | 4  |
| single hit | Q5V2T8_HALMA       | <i>rnaC1220</i> | Hypothetical protein                                                   | 1 | 1 | 0 | 0 | 0 | 0 | 0 | 0 | 1 | 0 | 1 | ∞   | 0.7 only | 1 | 0 | 100.0 | Memb only    | 201 | 0  |
| single hit | Q5V338_HALMA       | <i>rnaC1106</i> | Hypothetical protein                                                   | 1 | 1 | 0 | 0 | 0 | 0 | 0 | 0 | 1 | 0 | 1 | ∞   | 0.7 only | 1 | 0 | 100.0 | Memb only    | 139 | 0  |
| single hit | Q5V3C4_HALMA       | <i>rnaC1013</i> | Hypothetical protein                                                   | 1 | 1 | 0 | 0 | 0 | 0 | 0 | 0 | 1 | 0 | 1 | ∞   | 0.7 only | 1 | 0 | 100.0 | Memb only    | 469 | 12 |
| single hit | Q5V3K2_HALMA       | <i>rnaC0926</i> | Hypothetical protein                                                   | 1 | 1 | 0 | 0 | 0 | 0 | 0 | 0 | 1 | 0 | 1 | ∞   | 0.7 only | 1 | 0 | 100.0 | Memb only    | 291 | 2  |
| single hit | Q5V3U5_HALMA       | <i>rnaC0823</i> | Hypothetical protein                                                   | 1 | 1 | 0 | 0 | 0 | 0 | 0 | 0 | 1 | 0 | 1 | ∞   | 0.7 only | 1 | 0 | 100.0 | Memb only    | 404 | 1  |
| single hit | Q5V3X7_HALMA       | <i>pssA</i>     | CDP-diacetylglucosylserine O-phosphatidyltransferase                   | 1 | 1 | 0 | 0 | 0 | 0 | 0 | 0 | 1 | 0 | 1 | ∞   | 0.7 only | 1 | 0 | 100.0 | Memb only    | 228 | 5  |
| single hit | Q5V412_HALMA       | <i>rnaC0749</i> | Hypothetical protein                                                   | 1 | 1 | 0 | 0 | 0 | 0 | 0 | 0 | 1 | 0 | 1 | ∞   | 0.7 only | 1 | 0 | 100.0 | Memb only    | 295 | 8  |
| single hit | Q5V4M3_HALMA       | <i>hcp2</i>     | Halocyanin-like protein                                                | 1 | 1 | 0 | 0 | 0 | 0 | 0 | 0 | 1 | 0 | 1 | ∞   | 0.7 only | 1 | 0 | 100.0 | Memb only    | 190 | 0  |
| single hit | Q5V4M5_HALMA       | <i>rnaC0505</i> | Hypothetical protein                                                   | 1 | 1 | 0 | 0 | 0 | 0 | 0 | 0 | 1 | 0 | 1 | ∞   | 0.7 only | 1 | 0 | 100.0 | Memb only    | 494 | 1  |
| single hit | Q5V4N2_HALMA       | <i>rnaC0497</i> | Hypothetical protein                                                   | 1 | 1 | 0 | 0 | 0 | 0 | 0 | 0 | 1 | 0 | 1 | ∞   | 0.7 only | 1 | 0 | 100.0 | Memb only    | 156 | 2  |
| single hit | Q5V4U6_HALMA       | <i>gtr-2</i>    | Predicted glycosyltransferase                                          | 1 | 1 | 0 | 0 | 0 | 0 | 0 | 0 | 1 | 0 | 1 | ∞   | 0.7 only | 1 | 0 | 100.0 | Memb only    | 199 | 0  |
| single hit | Q5V5D1_HALMA       | <i>rnaC0211</i> | Hypothetical protein                                                   | 1 | 1 | 0 | 0 | 0 | 0 | 0 | 0 | 1 | 0 | 1 | ∞   | 0.7 only | 1 | 0 | 100.0 | Memb only    | 161 | 0  |
| single hit | Q5V5S6_HALMA       | <i>ctaB</i>     | Heme synthase                                                          | 1 | 1 | 0 | 0 | 0 | 0 | 0 | 0 | 1 | 0 | 1 | ∞   | 0.7 only | 1 | 0 | 100.0 | Memb only    | 463 | 13 |
| single hit | Q5V646_HALMA       | <i>pNG7311</i>  | Hypothetical protein                                                   | 1 | 1 | 0 | 0 | 0 | 0 | 0 | 0 | 1 | 0 | 1 | ∞   | 0.7 only | 1 | 0 | 100.0 | Memb only    | 395 | 1  |
| single hit | Q5V688_HALMA       | <i>pNG7264</i>  | Hypothetical protein                                                   | 1 | 1 | 0 | 0 | 0 | 0 | 0 | 0 | 1 | 0 | 1 | ∞   | 0.7 only | 1 | 0 | 100.0 | Memb only    | 157 | 4  |
| single hit | Q5V697_HALMA       | <i>rbsC-2</i>   | Sugar ABC transporter permease protein                                 | 1 | 1 | 0 | 0 | 0 | 0 | 0 | 0 | 1 | 0 | 1 | ∞   | 0.7 only | 1 | 0 | 100.0 | Memb only    | 330 | 9  |
| single hit | Q5V6P1_HALMA       | <i>cpt</i>      | CDP-alcohol phosphatidyltransferase (EC 2.7.8.-)                       | 1 | 1 | 0 | 0 | 0 | 0 | 0 | 0 | 1 | 0 | 1 | ∞   | 0.7 only | 1 | 0 | 100.0 | Memb only    | 257 | 5  |
| single hit | Q5V6S8_HALMA       | <i>pNG7056</i>  | Hypothetical protein                                                   | 1 | 1 | 0 | 0 | 0 | 0 | 0 | 0 | 1 | 0 | 1 | ∞   | 0.7 only | 1 | 0 | 100.0 | Memb only    | 336 | 0  |
| single hit | Q5V6U3_HALMA       | <i>pNG7039</i>  | Putative iron transport protein                                        | 1 | 1 | 0 | 0 | 0 | 0 | 0 | 0 | 1 | 0 | 1 | ∞   | 0.7 only | 1 | 0 | 100.0 | Memb only    | 414 | 0  |
| single hit | Q5V6V5_HALMA       | <i>sugA</i>     | Sugar ABC transporter permease protein                                 | 1 | 1 | 0 | 0 | 0 | 0 | 0 | 0 | 1 | 0 | 1 | ∞   | 0.7 only | 1 | 0 | 100.0 | Memb only    | 310 | 7  |
| single hit | Q5V6Z6_HALMA       | <i>cadA</i>     | Cadmium transporting P-type ATPase                                     | 1 | 1 | 0 | 0 | 0 | 0 | 0 | 0 | 1 | 0 | 1 | ∞   | 0.7 only | 1 | 0 | 100.0 | Memb only    | 639 | 5  |
| single hit | Q5V723_HALMA       | <i>copA1</i>    | Copper-transporting ATPase CopA                                        | 1 | 1 | 0 | 0 | 0 | 0 | 0 | 0 | 1 | 0 | 1 | ∞   | 0.7 only | 1 | 0 | 100.0 | Memb only    | 790 | 7  |
| single hit | Q5V744_HALMA       | <i>pNG6084</i>  | Hypothetical protein                                                   | 1 | 1 | 0 | 0 | 0 | 0 | 0 | 0 | 1 | 0 | 1 | ∞   | 0.7 only | 1 | 0 | 100.0 | Memb only    | 88  | 1  |
| single hit | Q5V803_HALMA       | <i>pNG3042</i>  | Hypothetical protein                                                   | 1 | 1 | 0 | 0 | 0 | 0 | 0 | 0 | 1 | 0 | 1 | ∞   | 0.7 only | 1 | 0 | 100.0 | Memb only    | 137 | 0  |
| single hit | ARLY_HALMARReview  | <i>argH</i>     | Argininosuccinate lyase (EC 4.3.2.1) (Argininosuccinase) (ASAL)        | 0 | 0 | 1 | 1 | 0 | 0 | 0 | 0 | 1 | 0 | 1 | ∞   | 0.7 only | 0 | 1 | 0.0   | Soluble only | 499 | 0  |
| single hit | CDC61_HALMARReview | <i>cdc6-1</i>   | Cell division control protein 6 homolog 1 (CDC6 homolog 1)             | 0 | 0 | 1 | 1 | 0 | 0 | 0 | 0 | 1 | 0 | 1 | ∞   | 0.7 only | 0 | 1 | 0.0   | Soluble only | 416 | 0  |
| single hit | CDC65_HALMARReview | <i>cdc6-5</i>   | Cell division control protein 6 homolog 5 (CDC6 homolog 5)             | 0 | 0 | 1 | 1 | 0 | 0 | 0 | 0 | 1 | 0 | 1 | ∞   | 0.7 only | 0 | 1 | 0.0   | Soluble only | 375 | 0  |
| single hit | COFD_HALMARReview  | <i>cofD</i>     | LPPG:FO 2-phospho-L-lactate transferase (EC 2.7.8.-)                   | 0 | 0 | 1 | 1 | 0 | 0 | 0 | 0 | 1 | 0 | 1 | ∞   | 0.7 only | 0 | 1 | 0.0   | Soluble only | 330 | 0  |
| single hit | ENGB_HALMARReview  | <i>engB</i>     | Probable GTP-binding protein engB                                      | 0 | 0 | 1 | 1 | 0 | 0 |   |   |   |   |   |     |          |   |   |       |              |     |    |

|            |  |                   |                  |                                                                                                           |   |   |   |   |   |   |   |   |   |   |     |          |          |   |       |            |              |      |    |
|------------|--|-------------------|------------------|-----------------------------------------------------------------------------------------------------------|---|---|---|---|---|---|---|---|---|---|-----|----------|----------|---|-------|------------|--------------|------|----|
| single hit |  | Q5UZM7_HALMA      | <i>prr</i>       | Proline racemase (EC 5.1.1.4)                                                                             | 0 | 0 | 1 | 1 | 0 | 0 | 0 | 0 | 1 | 0 | 1   | ∞        | 0.7 only | 0 | 1     | 0.0        | Soluble only | 323  | 0  |
| single hit |  | Q5V043_HALMA      | <i>phrH2</i>     | PhiH1 repressor-like                                                                                      | 0 | 0 | 1 | 1 | 0 | 0 | 0 | 0 | 1 | 0 | 1   | ∞        | 0.7 only | 0 | 1     | 0.0        | Soluble only | 108  | 0  |
| single hit |  | Q5V049_HALMA      | <i>coaD1</i>     | Phosphopantetheine adenylyltransferase (EC 2.7.7.3)                                                       | 0 | 0 | 1 | 1 | 0 | 0 | 0 | 0 | 1 | 0 | 1   | ∞        | 0.7 only | 0 | 1     | 0.0        | Soluble only | 199  | 0  |
| single hit |  | Q5V0A4_HALMA      | <i>rrnAC2214</i> | Hypothetical protein                                                                                      | 0 | 0 | 1 | 1 | 0 | 0 | 0 | 0 | 1 | 0 | 1   | ∞        | 0.7 only | 0 | 1     | 0.0        | Soluble only | 143  | 0  |
| single hit |  | Q5V0K1_HALMA      | <i>rrnAC2101</i> | Hypothetical protein                                                                                      | 0 | 0 | 1 | 1 | 0 | 0 | 0 | 0 | 1 | 0 | 1   | ∞        | 0.7 only | 0 | 1     | 0.0        | Soluble only | 87   | 0  |
| single hit |  | Q5V0K9_HALMA      | <i>htr</i>       | MCP domain signal transducer                                                                              | 0 | 0 | 1 | 1 | 0 | 0 | 0 | 0 | 1 | 0 | 1   | ∞        | 0.7 only | 0 | 1     | 0.0        | Soluble only | 328  | 0  |
| single hit |  | Q5V0T3_HALMA      | <i>rrnAC2009</i> | Hypothetical protein                                                                                      | 0 | 0 | 1 | 1 | 0 | 0 | 0 | 0 | 1 | 0 | 1   | ∞        | 0.7 only | 0 | 1     | 0.0        | Soluble only | 216  | 0  |
| single hit |  | Q5V0W2_HALMA      | <i>aacC</i>      | Aminoglycoside N <sup>3</sup> -acetyltransferase (EC 2.3.1.81)                                            | 0 | 0 | 1 | 1 | 0 | 0 | 0 | 0 | 1 | 0 | 1   | ∞        | 0.7 only | 0 | 1     | 0.0        | Soluble only | 271  | 0  |
| single hit |  | Q5V190_HALMA      | <i>idr</i>       | Iron-dependent repressor                                                                                  | 0 | 0 | 1 | 1 | 0 | 0 | 0 | 0 | 1 | 0 | 1   | ∞        | 0.7 only | 0 | 1     | 0.0        | Soluble only | 144  | 0  |
| single hit |  | Q5V1B5_HALMA      | <i>hilC</i>      | HTR-like protein                                                                                          | 0 | 0 | 1 | 1 | 0 | 0 | 0 | 0 | 1 | 0 | 1   | ∞        | 0.7 only | 0 | 1     | 0.0        | Soluble only | 300  | 0  |
| single hit |  | Q5V112_HALMA      | <i>cspD1</i>     | Cold shock protein                                                                                        | 0 | 0 | 1 | 1 | 0 | 0 | 0 | 0 | 1 | 0 | 1   | ∞        | 0.7 only | 0 | 1     | 0.0        | Soluble only | 64   | 0  |
| single hit |  | Q5V117_HALMA      | <i>hemX</i>      | Uroporphyrin-III C-methyltransferase                                                                      | 0 | 0 | 1 | 1 | 0 | 0 | 0 | 0 | 1 | 0 | 1   | ∞        | 0.7 only | 0 | 1     | 0.0        | Soluble only | 215  | 0  |
| single hit |  | Q5V1K4_HALMA      | <i>leuA1</i>     | 2-isopropylmalate synthase 2 (EC 2.3.3.13)                                                                | 0 | 0 | 1 | 1 | 0 | 0 | 0 | 0 | 1 | 0 | 1   | ∞        | 0.7 only | 0 | 1     | 0.0        | Soluble only | 502  | 0  |
| single hit |  | Q5V1P9_HALMA      | <i>smc2</i>      | Chromosome segregation protein                                                                            | 0 | 0 | 1 | 1 | 0 | 0 | 0 | 0 | 1 | 0 | 1   | ∞        | 0.7 only | 0 | 1     | 0.0        | Soluble only | 1195 | 0  |
| single hit |  | Q5V1Q6_HALMA      | <i>rrnAC1632</i> | Hypothetical protein                                                                                      | 0 | 0 | 1 | 1 | 0 | 0 | 0 | 0 | 1 | 0 | 1   | ∞        | 0.7 only | 0 | 1     | 0.0        | Soluble only | 143  | 0  |
| single hit |  | Q5V200_HALMA      | <i>radB</i>      | DNA repair and recombination protein RadB                                                                 | 0 | 0 | 1 | 1 | 0 | 0 | 0 | 0 | 1 | 0 | 1   | ∞        | 0.7 only | 0 | 1     | 0.0        | Soluble only | 192  | 0  |
| single hit |  | Q5V203_HALMA      | <i>rrnAC1529</i> | Hypothetical protein                                                                                      | 0 | 0 | 1 | 1 | 0 | 0 | 0 | 0 | 1 | 0 | 1   | ∞        | 0.7 only | 0 | 1     | 0.0        | Soluble only | 438  | 0  |
| single hit |  | Q5V231_HALMA      | <i>gcvH</i>      | Probable glycine cleavage system H protein                                                                | 0 | 0 | 1 | 1 | 0 | 0 | 0 | 0 | 1 | 0 | 1   | ∞        | 0.7 only | 0 | 1     | 0.0        | Soluble only | 127  | 0  |
| single hit |  | Q5V257_HALMA      | <i>trxB2</i>     | Thioredoxin reductase (EC 1.8.1.9)                                                                        | 0 | 0 | 1 | 1 | 0 | 0 | 0 | 0 | 1 | 0 | 1   | ∞        | 0.7 only | 0 | 1     | 0.0        | Soluble only | 199  | 0  |
| single hit |  | Q5V2W3_HALMA      | <i>rrnAC1190</i> | Hypothetical protein                                                                                      | 0 | 0 | 1 | 1 | 0 | 0 | 0 | 0 | 1 | 0 | 1   | ∞        | 0.7 only | 0 | 1     | 0.0        | Soluble only | 105  | 0  |
| single hit |  | Q5V319_HALMA      | <i>rrnAC1128</i> | Hypothetical protein                                                                                      | 0 | 0 | 1 | 1 | 0 | 0 | 0 | 0 | 1 | 0 | 1   | ∞        | 0.7 only | 0 | 1     | 0.0        | Soluble only | 94   | 0  |
| single hit |  | Q5V329_HALMA      | <i>rrnAC1116</i> | Hypothetical protein                                                                                      | 0 | 0 | 1 | 1 | 0 | 0 | 0 | 0 | 1 | 0 | 1   | ∞        | 0.7 only | 0 | 1     | 0.0        | Soluble only | 274  | 0  |
| single hit |  | Q5V3A0_HALMA      | <i>rrnAC1037</i> | Hypothetical protein                                                                                      | 0 | 0 | 1 | 1 | 0 | 0 | 0 | 0 | 1 | 0 | 1   | ∞        | 0.7 only | 0 | 1     | 0.0        | Soluble only | 160  | 0  |
| single hit |  | Q5V3D4_HALMA      | <i>rrnAC1002</i> | Hypothetical protein                                                                                      | 0 | 0 | 1 | 1 | 0 | 0 | 0 | 0 | 1 | 0 | 1   | ∞        | 0.7 only | 0 | 1     | 0.0        | Soluble only | 569  | 0  |
| single hit |  | Q5V3E9_HALMA      | <i>rrnAC0985</i> | Hypothetical protein                                                                                      | 0 | 0 | 1 | 1 | 0 | 0 | 0 | 0 | 1 | 0 | 1   | ∞        | 0.7 only | 0 | 1     | 0.0        | Soluble only | 179  | 0  |
| single hit |  | Q5V3H9_HALMA      | <i>moxR1</i>     | Methanol dehydrogenase regulatory protein                                                                 | 0 | 0 | 1 | 1 | 0 | 0 | 0 | 0 | 1 | 0 | 1   | ∞        | 0.7 only | 0 | 1     | 0.0        | Soluble only | 401  | 0  |
| single hit |  | Q5V3L1_HALMA      | <i>sorD</i>      | Sorbitol dehydrogenase (EC 1.1.1.140)                                                                     | 0 | 0 | 1 | 1 | 0 | 0 | 0 | 0 | 1 | 0 | 1   | ∞        | 0.7 only | 0 | 1     | 0.0        | Soluble only | 379  | 0  |
| single hit |  | Q5V3N5_HALMA      | <i>rrnAC0889</i> | Hypothetical protein                                                                                      | 0 | 0 | 1 | 1 | 0 | 0 | 0 | 0 | 1 | 0 | 1   | ∞        | 0.7 only | 0 | 1     | 0.0        | Soluble only | 128  | 0  |
| single hit |  | Q5V452_HALMA      | <i>rrnAC0704</i> | Hypothetical protein                                                                                      | 0 | 0 | 1 | 1 | 0 | 0 | 0 | 0 | 1 | 0 | 1   | ∞        | 0.7 only | 0 | 1     | 0.0        | Soluble only | 451  | 0  |
| single hit |  | Q5V4N3_HALMA      | <i>strR</i>      | Transcription repressor                                                                                   | 0 | 0 | 1 | 1 | 0 | 0 | 0 | 0 | 1 | 0 | 1   | ∞        | 0.7 only | 0 | 1     | 0.0        | Soluble only | 230  | 0  |
| single hit |  | Q5V560_HALMA      | <i>rrnAC0286</i> | Hypothetical protein                                                                                      | 0 | 0 | 1 | 1 | 0 | 0 | 0 | 0 | 1 | 0 | 1   | ∞        | 0.7 only | 0 | 1     | 0.0        | Soluble only | 244  | 0  |
| single hit |  | Q5V5A6_HALMA      | <i>rrnAC0238</i> | Hypothetical protein                                                                                      | 0 | 0 | 1 | 1 | 0 | 0 | 0 | 0 | 1 | 0 | 1   | ∞        | 0.7 only | 0 | 1     | 0.0        | Soluble only | 230  | 0  |
| single hit |  | Q5V5C6_HALMA      | <i>rrnAC0217</i> | Hypothetical protein                                                                                      | 0 | 0 | 1 | 1 | 0 | 0 | 0 | 0 | 1 | 0 | 1   | ∞        | 0.7 only | 0 | 1     | 0.0        | Soluble only | 118  | 0  |
| single hit |  | Q5V5D3_HALMA      | <i>rrnAC0208</i> | Hypothetical protein                                                                                      | 0 | 0 | 1 | 1 | 0 | 0 | 0 | 0 | 1 | 0 | 1   | ∞        | 0.7 only | 0 | 1     | 0.0        | Soluble only | 165  | 0  |
| single hit |  | Q5V5G7_HALMA      | <i>glbB</i>      | Glutamate synthase large subunit (EC 1.4.1.13)                                                            | 0 | 0 | 1 | 1 | 0 | 0 | 0 | 0 | 1 | 0 | 1   | ∞        | 0.7 only | 0 | 1     | 0.0        | Soluble only | 1515 | 0  |
| single hit |  | Q5V5K6_HALMA      | <i>udg2</i>      | Uracil DNA glycosylase superfamily protein (EC 3.2.2.-)                                                   | 0 | 0 | 1 | 1 | 0 | 0 | 0 | 0 | 1 | 0 | 1   | ∞        | 0.7 only | 0 | 1     | 0.0        | Soluble only | 208  | 0  |
| single hit |  | Q5V602_HALMA      | <i>pNG7357</i>   | Putative transcriptional regulator                                                                        | 0 | 0 | 1 | 1 | 0 | 0 | 0 | 0 | 1 | 0 | 1   | ∞        | 0.7 only | 0 | 1     | 0.0        | Soluble only | 217  | 0  |
| single hit |  | Q5V628_HALMA      | <i>cysE1</i>     | Serine acetyltransferase (EC 2.3.1.30)                                                                    | 0 | 0 | 1 | 1 | 0 | 0 | 0 | 0 | 1 | 0 | 1   | ∞        | 0.7 only | 0 | 1     | 0.0        | Soluble only | 287  | 0  |
| single hit |  | Q5V797_HALMA      | <i>pNG6160</i>   | Hypothetical protein                                                                                      | 0 | 0 | 1 | 1 | 0 | 0 | 0 | 0 | 1 | 0 | 1   | ∞        | 0.7 only | 0 | 1     | 0.0        | Soluble only | 199  | 0  |
| single hit |  | Q5V7C7_HALMA      | <i>pNG6122</i>   | Hypothetical protein                                                                                      | 0 | 0 | 1 | 1 | 0 | 0 | 0 | 0 | 1 | 0 | 1   | ∞        | 0.7 only | 0 | 1     | 0.0        | Soluble only | 249  | 0  |
| single hit |  | Q5V7Z7_HALMA      | <i>pNG3032</i>   | Hypothetical protein                                                                                      | 0 | 0 | 1 | 1 | 0 | 0 | 0 | 0 | 1 | 0 | 1   | ∞        | 0.7 only | 0 | 1     | 0.0        | Soluble only | 390  | 0  |
| single hit |  | Q5V856_HALMA      | <i>pNG2002</i>   | Hypothetical protein                                                                                      | 0 | 0 | 1 | 1 | 0 | 0 | 0 | 0 | 1 | 0 | 1   | ∞        | 0.7 only | 0 | 1     | 0.0        | Soluble only | 138  | 0  |
| single hit |  | Q5V878_HALMA      | <i>pNG1021</i>   | Hypothetical protein                                                                                      | 0 | 0 | 1 | 1 | 0 | 0 | 0 | 0 | 1 | 0 | 1   | ∞        | 0.7 only | 0 | 1     | 0.0        | Soluble only | 309  | 0  |
| single hit |  | RL23_HALMARReview | <i>rpl23p</i>    | 50S ribosomal protein L23P (Hmal23) (H125) (L21)                                                          | 0 | 0 | 1 | 1 | 0 | 0 | 0 | 0 | 1 | 0 | 1   | ∞        | 0.7 only | 0 | 1     | 0.0        | Soluble only | 85   | 0  |
| single hit |  | TRUD_HALMARReview | <i>truD</i>      | Probable tRNA pseudouridine synthase D (EC 5.4.99.-) (tRNA-uridineisomerase D) (tRNA pseudouridylylase D) | 0 | 0 | 1 | 1 | 0 | 0 | 0 | 0 | 1 | 0 | 1   | ∞        | 0.7 only | 0 | 1     | 0.0        | Soluble only | 460  | 0  |
| single hit |  | Q5UXL6_HALMA      | <i>rrnAC3294</i> | Hypothetical protein                                                                                      | 0 | 0 | 0 | 0 | 1 | 1 | 0 | 0 | 0 | 1 | 0   | 0.0      | 1.2 only | 1 | 0     | 100.0      | Membr only   | 135  | 3  |
| single hit |  | Q5UXT2_HALMA      | <i>mic</i>       | Mechanosensitive ion channel                                                                              | 0 | 0 | 0 | 0 | 1 | 1 | 0 | 0 | 0 | 1 | 0   | 0.0      | 1.2 only | 1 | 0     | 100.0      | Membr only   | 371  | 5  |
| single hit |  | Q5UXU5_HALMA      | <i>hcp1</i>      | Halocyanin-like                                                                                           | 0 | 0 | 0 | 0 | 1 | 1 | 0 | 0 | 0 | 1 | 0   | 0.0      | 1.2 only | 1 | 0     | 100.0      | Membr only   | 184  | 0  |
| single hit |  | Q5UYM5_HALMA      | <i>rrnAC2881</i> | Hypothetical protein                                                                                      | 0 | 0 | 0 | 0 | 1 | 1 | 0 | 0 | 0 | 1 | 0   | 0.0      | 1.2 only | 1 | 0     | 100.0      | Membr only   | 280  | 0  |
| single hit |  | Q5UZ10_HALMA      | <i>htr</i>       | Putative HAMP and MCP domain signal transducer                                                            | 0 | 0 | 0 | 0 | 1 | 1 | 0 | 0 | 0 | 1 | 0   | 0.0      | 1.2 only | 1 | 0     | 100.0      | Membr only   | 784  | 2  |
| single hit |  | Q5UZP8_HALMA      | <i>rrnAC2446</i> | Putative glycy aminopeptidase                                                                             | 0 | 0 | 0 | 0 | 1 | 1 | 0 | 0 | 0 | 1 | 0   | 0.0      | 1.2 only | 1 | 0     | 100.0      | Membr only   | 770  | 1  |
| single hit |  | Q5V015_HALMA      | <i>rrnAC2117</i> | Hypothetical protein                                                                                      | 0 | 0 | 0 | 0 | 1 | 1 | 0 | 0 | 0 | 1 | 0   | 0.0      | 1.2 only | 1 | 0     | 100.0      | Membr only   | 255  | 7  |
| single hit |  | Q5V0P2_HALMA      | <i>rrnAC2054</i> | Hypothetical protein                                                                                      | 0 | 0 | 0 | 0 | 1 | 1 | 0 | 0 | 1 | 0 | 0.0 | 1.2 only | 1        | 0 | 100.0 | Membr only | 259          | 1    |    |
| single hit |  | Q5V0T2_HALMA      | <i>rrnAC2010</i> | Hypothetical protein                                                                                      | 0 | 0 | 0 | 0 | 1 | 1 | 0 | 0 | 0 | 1 | 0   | 0.0      | 1.2 only | 1 | 0     | 100.0      | Membr only   | 260  | 1  |
| single hit |  | Q5V0V1_HALMA      | <i>anf</i>       | ABC transporter substrate-binding protein                                                                 | 0 | 0 | 0 | 0 | 1 | 1 | 0 | 0 | 0 | 1 | 0   | 0.0      | 1.2 only | 1 | 0     | 100.0      | Membr only   | 456  | 0  |
| single hit |  | Q5V1N0_HALMA      | <i>hop</i>       | Halorhodopsin                                                                                             | 0 | 0 | 0 | 0 | 1 | 1 | 0 | 0 | 0 | 1 | 0   | 0.0      | 1.2 only | 1 | 0     | 100.0      | Membr only   | 276  | 7  |
| single hit |  | Q5V1R4_HALMA      | <i>rrnAC1623</i> | Hypothetical protein                                                                                      | 0 | 0 | 0 | 0 | 1 | 1 | 0 | 0 | 1 | 0 | 0.0 | 1.2 only | 1        | 0 | 100.0 | Membr only | 96           | 0    |    |
| single hit |  | Q5V2E2_HALMA      | <i>rrnAC1381</i> | Hypothetical protein                                                                                      | 0 | 0 | 0 | 0 | 1 | 1 | 0 | 0 | 0 | 1 | 0   | 0.0      | 1.2 only | 1 | 0     | 100.0      | Membr only   | 98   | 3  |
| single hit |  | Q5V2F2_HALMA      | <i>trxB7</i>     | Thioredoxin                                                                                               | 0 | 0 | 0 | 0 | 1 | 1 | 0 | 0 | 0 | 1 | 0   | 0.0      | 1.2 only | 1 | 0     | 100.0      | Membr only   | 154  | 1  |
| single hit |  | Q5V3F7_HALMA      | <i>htr8</i>      | MCP domain signal transducer                                                                              | 0 | 0 | 0 | 0 | 1 | 1 | 0 | 0 | 0 | 1 | 0   | 0.0      | 1.2 only | 1 | 0     | 100.0      | Membr only   | 630  | 5  |
| single hit |  | Q5V3K6_HALMA      | <i>malFG-5</i>   | Putative ABC transporter permease protein                                                                 | 0 | 0 | 0 | 0 | 1 | 1 | 0 | 0 | 0 | 1 | 0   | 0.0      | 1.2 only | 1 | 0     | 100.0      | Membr only   | 326  | 8  |
| single hit |  | Q5V434_HALMA      | <i>rrnAC0725</i> | Hypothetical protein                                                                                      | 0 | 0 | 0 | 0 | 1 | 1 | 0 | 0 | 0 | 1 | 0   | 0.0      | 1.2 only | 1 | 0     | 100.0      | Membr only   | 389  | 0  |
| single hit |  | Q5V410_HALMA      | <i>gpdC</i>      | Glycerol-3-phosphate dehydrogenase chain C                                                                | 0 | 0 | 0 | 0 | 1 | 1 | 0 | 0 | 0 | 1 | 0   | 0.0      | 1.2 only | 1 | 0     | 100.0      | Membr only   | 458  | 0  |
| single hit |  | Q5V4V2_HALMA      | <i>rhoM</i>      | Putative intramembrane serine protease                                                                    | 0 | 0 | 0 | 0 | 1 | 1 | 0 | 0 | 0 | 1 | 0   | 0.0      | 1.2 only | 1 | 0     | 100.0      | Membr only   | 552  | 10 |
| single hit |  | Q5V504_HALMA      | <i>ubiA</i>      | Putative UbiA prenyltransferase                                                                           | 0 | 0 | 0 | 0 | 1 | 1 | 0 | 0 | 0 | 1 | 0   | 0.0      | 1.2 only | 1 | 0     | 100.0      | Membr only   | 284  | 7  |
| single hit |  | Q5V5D9_HALMA      | <i>rrnAC0202</i> | Hypothetical protein                                                                                      | 0 | 0 | 0 | 0 | 1 | 1 | 0 | 0 | 1 | 0 | 0.0 | 1.2 only | 1        | 0 | 100.0 | Membr only | 373          | 5    |    |
| single hit |  | Q5V5E6_HALMA      | <i>yfmO2</i>     | Multidrug resistance protein-like                                                                         | 0 | 0 | 0 | 0 | 1 | 1 | 0 | 0 | 0 | 1 | 0   | 0.0      | 1.2 only | 1 | 0     | 100.0      | Membr only   | 435  | 11 |
| single hit |  | Q5V5P1_HALMA      | <i>rrnAC0082</i> | Hypothetical protein                                                                                      | 0 | 0 | 0 | 0 | 1 | 1 | 0 | 0 | 0 | 1 | 0   | 0.0      | 1.2 only | 1 | 0     | 100.0      | Membr only   | 421  | 0  |
| single hit |  | Q5V685_HALMA      | <i>pNG7267</i>   | Hypothetical protein                                                                                      | 0 | 0 | 0 | 0 | 1 | 1 | 0 | 0 | 0 |   |     |          |          |   |       |            |              |      |    |



|            |                    |                  |                                                                                        |   |   |   |   |   |   |   |   |   |   |   |     |          |   |   |     |              |     |   |
|------------|--------------------|------------------|----------------------------------------------------------------------------------------|---|---|---|---|---|---|---|---|---|---|---|-----|----------|---|---|-----|--------------|-----|---|
| single hit | Q5UXG7_HALMA       | <i>bcp2</i>      | Bacterioferritin comigratory protein                                                   | 0 | 0 | 0 | 0 | 0 | 0 | 1 | 1 | 0 | 1 | 1 | 0.0 | 1.2 only | 0 | 1 | 0.0 | Soluble only | 176 | 0 |
| single hit | Q5UXQ1_HALMA       | <i>rrmAC3256</i> | Hypothetical protein                                                                   | 0 | 0 | 0 | 0 | 0 | 0 | 1 | 1 | 0 | 1 | 1 | 0.0 | 1.2 only | 0 | 1 | 0.0 | Soluble only | 220 | 0 |
| single hit | Q5UXS1_HALMA       | <i>acs3</i>      | Acyl-coenzyme A synthetase (EC 6.2.1.1)                                                | 0 | 0 | 0 | 0 | 0 | 0 | 1 | 1 | 0 | 1 | 1 | 0.0 | 1.2 only | 0 | 1 | 0.0 | Soluble only | 652 | 0 |
| single hit | Q5UYC2_HALMA       | <i>fabG6</i>     | 3-oxoacyl-[acyl-carrier protein] reductase (EC 1.1.1.100)                              | 0 | 0 | 0 | 0 | 0 | 0 | 1 | 1 | 0 | 1 | 1 | 0.0 | 1.2 only | 0 | 1 | 0.0 | Soluble only | 254 | 0 |
| single hit | Q5UYF8_HALMA       | <i>rrmAC2962</i> | Putative haloacid dehalogenase-like hydrolase                                          | 0 | 0 | 0 | 0 | 0 | 0 | 1 | 1 | 0 | 1 | 1 | 0.0 | 1.2 only | 0 | 1 | 0.0 | Soluble only | 218 | 0 |
| single hit | Q5UYH4_HALMA       | <i>rrmAC2944</i> | Hypothetical protein                                                                   | 0 | 0 | 0 | 0 | 0 | 0 | 1 | 1 | 0 | 1 | 1 | 0.0 | 1.2 only | 0 | 1 | 0.0 | Soluble only | 94  | 0 |
| single hit | Q5UYN1_HALMA       | <i>phaJ1</i>     | (R)-specific enoyl-CoA hydratase (EC 4.2.1.-)                                          | 0 | 0 | 0 | 0 | 0 | 0 | 1 | 1 | 0 | 1 | 1 | 0.0 | 1.2 only | 0 | 1 | 0.0 | Soluble only | 148 | 0 |
| single hit | Q5UYS3_HALMA       | <i>rrmAC2826</i> | Hypothetical protein                                                                   | 0 | 0 | 0 | 0 | 0 | 0 | 1 | 1 | 0 | 1 | 1 | 0.0 | 1.2 only | 0 | 1 | 0.0 | Soluble only | 295 | 0 |
| single hit | Q5UYW7_HALMA       | <i>rrmAC2777</i> | DNA binding protein putative transcriptional regulator                                 | 0 | 0 | 0 | 0 | 0 | 0 | 1 | 1 | 0 | 1 | 1 | 0.0 | 1.2 only | 0 | 1 | 0.0 | Soluble only | 198 | 0 |
| single hit | Q5UZ39_HALMA       | <i>rrmAC2692</i> | Sensor protein (EC 2.7.13.3)                                                           | 0 | 0 | 0 | 0 | 0 | 0 | 1 | 1 | 0 | 1 | 1 | 0.0 | 1.2 only | 0 | 1 | 0.0 | Soluble only | 688 | 0 |
| single hit | Q5UZ97_HALMA       | <i>ghnB</i>      | Nitrogen regulatory protein P-II                                                       | 0 | 0 | 0 | 0 | 0 | 0 | 1 | 1 | 0 | 1 | 1 | 0.0 | 1.2 only | 0 | 1 | 0.0 | Soluble only | 121 | 0 |
| single hit | Q5UZR0_HALMA       | <i>rrmAC2433</i> | Hypothetical protein                                                                   | 0 | 0 | 0 | 0 | 0 | 0 | 1 | 1 | 0 | 1 | 1 | 0.0 | 1.2 only | 0 | 1 | 0.0 | Soluble only | 217 | 0 |
| single hit | Q5UZU7_HALMA       | <i>rrmAC2392</i> | Hypothetical protein                                                                   | 0 | 0 | 0 | 0 | 0 | 0 | 1 | 1 | 0 | 1 | 1 | 0.0 | 1.2 only | 0 | 1 | 0.0 | Soluble only | 544 | 0 |
| single hit | Q5UZV1_HALMA       | <i>rrmAC2387</i> | Hypothetical protein                                                                   | 0 | 0 | 0 | 0 | 0 | 0 | 1 | 1 | 0 | 1 | 1 | 0.0 | 1.2 only | 0 | 1 | 0.0 | Soluble only | 119 | 0 |
| single hit | Q5UZV6_HALMA       | <i>mp</i>        | Phage integrase                                                                        | 0 | 0 | 0 | 0 | 0 | 0 | 1 | 1 | 0 | 1 | 1 | 0.0 | 1.2 only | 0 | 1 | 0.0 | Soluble only | 340 | 0 |
| single hit | Q5UZX4_HALMA       | <i>rimK</i>      | Ribosomal protein S6 modification protein                                              | 0 | 0 | 0 | 0 | 0 | 0 | 1 | 1 | 0 | 1 | 1 | 0.0 | 1.2 only | 0 | 1 | 0.0 | Soluble only | 287 | 0 |
| single hit | Q5V045_HALMA       | <i>copG1</i>     | Transcriptional regulator CopG family                                                  | 0 | 0 | 0 | 0 | 0 | 0 | 1 | 1 | 0 | 1 | 1 | 0.0 | 1.2 only | 0 | 1 | 0.0 | Soluble only | 136 | 0 |
| single hit | Q5V0G4_HALMA       | <i>phoU1</i>     | Phosphate transport system regulatory protein PhoU                                     | 0 | 0 | 0 | 0 | 0 | 0 | 1 | 1 | 0 | 1 | 1 | 0.0 | 1.2 only | 0 | 1 | 0.0 | Soluble only | 225 | 0 |
| single hit | Q5V0I9_HALMA       | <i>rrmAC2113</i> | Hypothetical protein                                                                   | 0 | 0 | 0 | 0 | 0 | 0 | 1 | 1 | 0 | 1 | 1 | 0.0 | 1.2 only | 0 | 1 | 0.0 | Soluble only | 466 | 0 |
| single hit | Q5V0J6_HALMA       | <i>rrmAC2106</i> | Hypothetical protein                                                                   | 0 | 0 | 0 | 0 | 0 | 0 | 1 | 1 | 0 | 1 | 1 | 0.0 | 1.2 only | 0 | 1 | 0.0 | Soluble only | 290 | 0 |
| single hit | Q5V0N8_HALMA       | <i>rrmAC2059</i> | Hypothetical protein                                                                   | 0 | 0 | 0 | 0 | 0 | 0 | 1 | 1 | 0 | 1 | 1 | 0.0 | 1.2 only | 0 | 1 | 0.0 | Soluble only | 122 | 0 |
| single hit | Q5V0R0_HALMA       | <i>pkn</i>       | Serine/threonine protein kinase                                                        | 0 | 0 | 0 | 0 | 0 | 0 | 1 | 1 | 0 | 1 | 1 | 0.0 | 1.2 only | 0 | 1 | 0.0 | Soluble only | 302 | 0 |
| single hit | Q5V0S4_HALMA       | <i>lpl</i>       | Lipoate protein ligase (EC 6.3.4.-)                                                    | 0 | 0 | 0 | 0 | 0 | 0 | 1 | 1 | 0 | 1 | 1 | 0.0 | 1.2 only | 0 | 1 | 0.0 | Soluble only | 264 | 0 |
| single hit | Q5V0W5_HALMA       | <i>arcR5</i>     | Transcription regulator                                                                | 0 | 0 | 0 | 0 | 0 | 0 | 1 | 1 | 0 | 1 | 1 | 0.0 | 1.2 only | 0 | 1 | 0.0 | Soluble only | 269 | 0 |
| single hit | Q5V0X6_HALMA       | <i>rrmAC1959</i> | Hypothetical protein                                                                   | 0 | 0 | 0 | 0 | 0 | 0 | 1 | 1 | 0 | 1 | 1 | 0.0 | 1.2 only | 0 | 1 | 0.0 | Soluble only | 109 | 0 |
| single hit | Q5V0Z8_HALMA       | <i>rrmAC1935</i> | Hypothetical protein                                                                   | 0 | 0 | 0 | 0 | 0 | 0 | 1 | 1 | 0 | 1 | 1 | 0.0 | 1.2 only | 0 | 1 | 0.0 | Soluble only | 241 | 0 |
| single hit | Q5V163_HALMA       | <i>rrmAC1855</i> | Hypothetical protein                                                                   | 0 | 0 | 0 | 0 | 0 | 0 | 1 | 1 | 0 | 1 | 1 | 0.0 | 1.2 only | 0 | 1 | 0.0 | Soluble only | 109 | 0 |
| single hit | Q5V1Q7_HALMA       | <i>rrmAC1631</i> | Hypothetical protein                                                                   | 0 | 0 | 0 | 0 | 0 | 0 | 1 | 1 | 0 | 1 | 1 | 0.0 | 1.2 only | 0 | 1 | 0.0 | Soluble only | 145 | 0 |
| single hit | Q5V1Z7_HALMA       | <i>irkA2</i>     | Potassium uptake protein TrkA                                                          | 0 | 0 | 0 | 0 | 0 | 0 | 1 | 1 | 0 | 1 | 1 | 0.0 | 1.2 only | 0 | 1 | 0.0 | Soluble only | 464 | 1 |
| single hit | Q5V229_HALMA       | <i>rrmAC1501</i> | Sensor protein (EC 2.7.13.3)                                                           | 0 | 0 | 0 | 0 | 0 | 0 | 1 | 1 | 0 | 1 | 1 | 0.0 | 1.2 only | 0 | 1 | 0.0 | Soluble only | 598 | 0 |
| single hit | Q5V252_HALMA       | <i>rrmAC1475</i> | Hypothetical protein                                                                   | 0 | 0 | 0 | 0 | 0 | 0 | 1 | 1 | 0 | 1 | 1 | 0.0 | 1.2 only | 0 | 1 | 0.0 | Soluble only | 413 | 0 |
| single hit | Q5V2G3_HALMA       | <i>mutT5</i>     | Mut/nudix family protein                                                               | 0 | 0 | 0 | 0 | 0 | 0 | 1 | 1 | 0 | 1 | 1 | 0.0 | 1.2 only | 0 | 1 | 0.0 | Soluble only | 158 | 0 |
| single hit | Q5V2K3_HALMA       | <i>rrmAC1316</i> | Hypothetical protein                                                                   | 0 | 0 | 0 | 0 | 0 | 0 | 1 | 1 | 0 | 1 | 1 | 0.0 | 1.2 only | 0 | 1 | 0.0 | Soluble only | 239 | 0 |
| single hit | Q5V2P1_HALMA       | <i>rrmAC1272</i> | Hypothetical protein                                                                   | 0 | 0 | 0 | 0 | 0 | 0 | 1 | 1 | 0 | 1 | 1 | 0.0 | 1.2 only | 0 | 1 | 0.0 | Soluble only | 571 | 0 |
| single hit | Q5V2P7_HALMA       | <i>rrmAC1263</i> | Hypothetical protein                                                                   | 0 | 0 | 0 | 0 | 0 | 0 | 1 | 1 | 0 | 1 | 1 | 0.0 | 1.2 only | 0 | 1 | 0.0 | Soluble only | 297 | 0 |
| single hit | Q5V2Q2_HALMA       | <i>cheC2</i>     | Chemotaxis protein CheC                                                                | 0 | 0 | 0 | 0 | 0 | 0 | 1 | 1 | 0 | 1 | 1 | 0.0 | 1.2 only | 0 | 1 | 0.0 | Soluble only | 200 | 0 |
| single hit | Q5V2W5_HALMA       | <i>moaB1</i>     | Molybdenum cofactor biosynthesis protein B                                             | 0 | 0 | 0 | 0 | 0 | 0 | 1 | 1 | 0 | 1 | 1 | 0.0 | 1.2 only | 0 | 1 | 0.0 | Soluble only | 211 | 0 |
| single hit | Q5V2Z3_HALMA       | <i>rrmAC1158</i> | Protein phosphatase 2C like phosphatase                                                | 0 | 0 | 0 | 0 | 0 | 0 | 1 | 1 | 0 | 1 | 1 | 0.0 | 1.2 only | 0 | 1 | 0.0 | Soluble only | 402 | 0 |
| single hit | Q5V2Z4_HALMA       | <i>rrmAC1157</i> | Putative DNA-binding protein with a phosphopeptide binding motif                       | 0 | 0 | 0 | 0 | 0 | 0 | 1 | 1 | 0 | 1 | 1 | 0.0 | 1.2 only | 0 | 1 | 0.0 | Soluble only | 377 | 0 |
| single hit | Q5V343_HALMA       | <i>rrmAC1100</i> | Hypothetical protein                                                                   | 0 | 0 | 0 | 0 | 0 | 0 | 1 | 1 | 0 | 1 | 1 | 0.0 | 1.2 only | 0 | 1 | 0.0 | Soluble only | 83  | 0 |
| single hit | Q5V394_HALMA       | <i>rrmAC1044</i> | Putative acetamidase/formamidase (EC 3.5.1.-)                                          | 0 | 0 | 0 | 0 | 0 | 0 | 1 | 1 | 0 | 1 | 1 | 0.0 | 1.2 only | 0 | 1 | 0.0 | Soluble only | 434 | 0 |
| single hit | Q5V3R7_HALMA       | <i>pebP</i>      | Phosphatidylethanolamine-binding protein                                               | 0 | 0 | 0 | 0 | 0 | 0 | 1 | 1 | 0 | 1 | 1 | 0.0 | 1.2 only | 0 | 1 | 0.0 | Soluble only | 229 | 0 |
| single hit | Q5V3V6_HALMA       | <i>rrmAC0811</i> | Hypothetical protein                                                                   | 0 | 0 | 0 | 0 | 0 | 0 | 1 | 1 | 0 | 1 | 1 | 0.0 | 1.2 only | 0 | 1 | 0.0 | Soluble only | 143 | 0 |
| single hit | Q5V3W0_HALMA       | <i>rrmAC0806</i> | Putative C2H2 zinc finger DNA-binding protein                                          | 0 | 0 | 0 | 0 | 0 | 0 | 1 | 1 | 0 | 1 | 1 | 0.0 | 1.2 only | 0 | 1 | 0.0 | Soluble only | 44  | 0 |
| single hit | Q5V3Z6_HALMA       | <i>rrmAC0767</i> | Hypothetical protein                                                                   | 0 | 0 | 0 | 0 | 0 | 0 | 1 | 1 | 0 | 1 | 1 | 0.0 | 1.2 only | 0 | 1 | 0.0 | Soluble only | 95  | 0 |
| single hit | Q5V444_HALMA       | <i>rrmAC0715</i> | Hypothetical protein                                                                   | 0 | 0 | 0 | 0 | 0 | 0 | 1 | 1 | 0 | 1 | 1 | 0.0 | 1.2 only | 0 | 1 | 0.0 | Soluble only | 101 | 0 |
| single hit | Q5V4B8_HALMA       | <i>msbA-1</i>    | ABC transporter ATP-binding protein                                                    | 0 | 0 | 0 | 0 | 0 | 0 | 1 | 1 | 0 | 1 | 1 | 0.0 | 1.2 only | 0 | 1 | 0.0 | Soluble only | 602 | 5 |
| single hit | Q5V4G4_HALMA       | <i>hitD</i>      | Sensor protein (EC 2.7.13.3)                                                           | 0 | 0 | 0 | 0 | 0 | 0 | 1 | 1 | 0 | 1 | 1 | 0.0 | 1.2 only | 0 | 1 | 0.0 | Soluble only | 631 | 0 |
| single hit | Q5V4I7_HALMA       | <i>glcK</i>      | Glucokinase (EC 2.7.1.2)                                                               | 0 | 0 | 0 | 0 | 0 | 0 | 1 | 1 | 0 | 1 | 1 | 0.0 | 1.2 only | 0 | 1 | 0.0 | Soluble only | 323 | 0 |
| single hit | Q5V4R0_HALMA       | <i>ligA</i>      | DNA ligase (EC 6.5.1.1)                                                                | 0 | 0 | 0 | 0 | 0 | 0 | 1 | 1 | 0 | 1 | 1 | 0.0 | 1.2 only | 0 | 1 | 0.0 | Soluble only | 554 | 0 |
| single hit | Q5V4T5_HALMA       | <i>rrmAC0433</i> | Hypothetical protein                                                                   | 0 | 0 | 0 | 0 | 0 | 0 | 1 | 1 | 0 | 1 | 1 | 0.0 | 1.2 only | 0 | 1 | 0.0 | Soluble only | 151 | 0 |
| single hit | Q5V575_HALMA       | <i>rrmAC0271</i> | Hypothetical protein                                                                   | 0 | 0 | 0 | 0 | 0 | 0 | 1 | 1 | 0 | 1 | 1 | 0.0 | 1.2 only | 0 | 1 | 0.0 | Soluble only | 308 | 0 |
| single hit | Q5V5C5_HALMA       | <i>rpoM</i>      | DNA-directed RNA-polymerase subunit M                                                  | 0 | 0 | 0 | 0 | 0 | 0 | 1 | 1 | 0 | 1 | 1 | 0.0 | 1.2 only | 0 | 1 | 0.0 | Soluble only | 108 | 0 |
| single hit | Q5V5E3_HALMA       | <i>odc</i>       | Diaminopimelate decarboxylase (EC 4.1.1.20)                                            | 0 | 0 | 0 | 0 | 0 | 0 | 1 | 1 | 0 | 1 | 1 | 0.0 | 1.2 only | 0 | 1 | 0.0 | Soluble only | 434 | 0 |
| single hit | Q5V5M9_HALMA       | <i>mer3</i>      | NSN10-methylenetetrahydromethanopterin reductase                                       | 0 | 0 | 0 | 0 | 0 | 0 | 1 | 1 | 0 | 1 | 1 | 0.0 | 1.2 only | 0 | 1 | 0.0 | Soluble only | 324 | 0 |
| single hit | Q5V5R7_HALMA       | <i>citG</i>      | CitG family protein                                                                    | 0 | 0 | 0 | 0 | 0 | 0 | 1 | 1 | 0 | 1 | 1 | 0.0 | 1.2 only | 0 | 1 | 0.0 | Soluble only | 238 | 0 |
| single hit | Q5V5V0_HALMA       | <i>rrmAC0017</i> | Hypothetical protein                                                                   | 0 | 0 | 0 | 0 | 0 | 0 | 1 | 1 | 0 | 1 | 1 | 0.0 | 1.2 only | 0 | 1 | 0.0 | Soluble only | 174 | 0 |
| single hit | Q5V689_HALMA       | <i>pNG7263</i>   | Hypothetical protein                                                                   | 0 | 0 | 0 | 0 | 0 | 0 | 1 | 1 | 0 | 1 | 1 | 0.0 | 1.2 only | 0 | 1 | 0.0 | Soluble only | 256 | 0 |
| single hit | Q5V6A3_HALMA       | <i>amaB</i>      | N-carbamoyl-L-amino acid amidohydrolase (EC 3.5.1.-)                                   | 0 | 0 | 0 | 0 | 0 | 0 | 1 | 1 | 0 | 1 | 1 | 0.0 | 1.2 only | 0 | 1 | 0.0 | Soluble only | 410 | 0 |
| single hit | Q5V6G3_HALMA       | <i>pNG7183</i>   | Transcription regulator                                                                | 0 | 0 | 0 | 0 | 0 | 0 | 1 | 1 | 0 | 1 | 1 | 0.0 | 1.2 only | 0 | 1 | 0.0 | Soluble only | 199 | 0 |
| single hit | Q5V6H2_HALMA       | <i>pNG7174</i>   | Hypothetical protein                                                                   | 0 | 0 | 0 | 0 | 0 | 0 | 1 | 1 | 0 | 1 | 1 | 0.0 | 1.2 only | 0 | 1 | 0.0 | Soluble only | 126 | 0 |
| single hit | Q5V6Q5_HALMA       | <i>pNG7082</i>   | Sulfatase (EC 3.1.6.-)                                                                 | 0 | 0 | 0 | 0 | 0 | 0 | 1 | 1 | 0 | 1 | 1 | 0.0 | 1.2 only | 0 | 1 | 0.0 | Soluble only | 451 | 0 |
| single hit | Q5V6V8_HALMA       | <i>kdgR1</i>     | Transcriptional regulator                                                              | 0 | 0 | 0 | 0 | 0 | 0 | 1 | 1 | 0 | 1 | 1 | 0.0 | 1.2 only | 0 | 1 | 0.0 | Soluble only | 255 | 0 |
| single hit | Q5V773_HALMA       | <i>pNG6134</i>   | Transcription regulator                                                                | 0 | 0 | 0 | 0 | 0 | 0 | 1 | 1 | 0 | 1 | 1 | 0.0 | 1.2 only | 0 | 1 | 0.0 | Soluble only | 249 | 0 |
| single hit | Q5V7E4_HALMA       | <i>pNG5120</i>   | Hypothetical protein                                                                   | 0 | 0 | 0 | 0 | 0 | 0 | 1 | 1 | 0 | 1 | 1 | 0.0 | 1.2 only | 0 | 1 | 0.0 | Soluble only | 122 | 0 |
| single hit | Q5V7I5_HALMA       | <i>pNG5024</i>   | Hypothetical protein                                                                   | 0 | 0 | 0 | 0 | 0 | 0 | 1 | 1 | 0 | 1 | 1 | 0.0 | 1.2 only | 0 | 1 | 0.0 | Soluble only | 197 | 0 |
| single hit | Q5V848_HALMA       | <i>pNG2010</i>   | Hypothetical protein                                                                   | 0 | 0 | 0 | 0 | 0 | 0 | 1 | 1 | 0 | 1 | 1 | 0.0 | 1.2 only | 0 | 1 | 0.0 | Soluble only | 148 | 0 |
| single hit | RS14_HALMARReview  | <i>rps14p</i>    | 30S ribosomal protein S14P (HmaS14)                                                    | 0 | 0 | 0 | 0 | 0 | 0 | 1 | 1 | 0 | 1 | 1 | 0.0 | 1.2 only | 0 | 1 | 0.0 | Soluble only | 61  | 0 |
| single hit | RS27A_HALMARReview | <i>rps27ae</i>   | 30S ribosomal protein S27ae (HSH)                                                      | 0 | 0 | 0 | 0 | 0 | 0 | 1 | 1 | 0 | 1 | 1 | 0.0 | 1.2 only | 0 | 1 | 0.0 | Soluble only | 44  | 0 |
| single hit | TRPE3_HALMARReview | <i>trpE3</i>     | Anthranilate synthase component 1 3 (EC 4.1.3.27) (Anthranilatesynthase component 1 3) | 0 | 0 | 0 | 0 | 0 | 0 | 1 | 1 | 0 | 1 | 1 | 0.0 | 1.2 only |   |   |     |              |     |   |
