# Supplementary material
Source: PubMed Central journal article supplement (PMC3168985)
Supplement: NIHMS304204-supplement-13_si_013.pdf [file NIHMS304204-supplement-13_si_013.pdf]

|           |                  |                  |                                                                                             |     |     |     |     |     |   |       |
|-----------|------------------|------------------|---------------------------------------------------------------------------------------------|-----|-----|-----|-----|-----|---|-------|
| pNG7161   | Q5V613_HALMA     | <i>mntH</i>      | Putative Mn transporter.                                                                    | 7   | 6   | 13  | 1.2 | 13  | 0 | 100.0 |
| pNG6046   | Q5V7E1_HALMA     | <i>copA3</i>     | Copper-transporting ATPase (EC 3.6.3.4).                                                    | 7   | 5   | 12  | 1.4 | 12  | 0 | 100.0 |
| rrnB0270  | Q5UWB2_HALMA     | <i>zntA2</i>     | Zinc-transporting ATPase.                                                                   | 6   | 2   | 8   | 3.0 | 8   | 0 | 100.0 |
| rrnAC0243 | Q5V5A2_HALMA     | <i>trkA7</i>     | TRK potassium uptake system protein.                                                        | 2   | 5   | 7   | 0.4 | 0   | 7 | 0.0   |
| rrnAC2280 | Q5V048_HALMA     | <i>cbiQ1</i>     | Cobalt transport protein.                                                                   | 3   | 4   | 7   | 0.8 | 7   | 0 | 100.0 |
| rrnAC0755 | Q5V406_HALMA     | <i>trkH3</i>     | TRK potassium uptake system protein.                                                        | 2   | 1   | 3   | 2.0 | 3   | 0 | 100.0 |
| rrnAC1296 | Q5V2M0_HALMA     | <i>corA</i>      | Magnesium Mg(2+)/cobalt Co(2+) transport protein.                                           | 1   | 2   | 3   | 0.5 | 3   | 0 | 100.0 |
| rrnAC2244 | Q5V078_HALMA     | <i>rrnAC2244</i> | Putative ZIP domain zinc transporter.                                                       | 2   | 0   | 2   | ∞   | 2   | 0 | 100.0 |
| rrnAC2656 | Q5UZ68_HALMA     | <i>yufN</i>      | ABC transporter.                                                                            | 125 | 127 | 252 | 1.0 | 252 | 0 | 100.0 |
| rrnAC1589 | SECY_HALMAReview | <i>secY</i>      | Preprotein translocase subunit secY (Protein transport protein SEC61subunit alpha homolog). | 62  | 51  | 113 | 1.2 | 113 | 0 | 100.0 |
| rrnAC3215 | Q5UXT5_HALMA     | <i>secD</i>      | Protein-export membrane protein SecD.                                                       | 59  | 47  | 106 | 1.3 | 106 | 0 | 100.0 |
| rrnAC3267 | Q5UXP0_HALMA     | <i>rrnAC3267</i> | Molybdate transport protein.                                                                | 31  | 27  | 58  | 1.1 | 58  | 0 | 100.0 |
| rrnAC0252 | Q5V593_HALMA     | <i>abcS-2</i>    | ABC transporter permease protein.                                                           | 22  | 17  | 39  | 1.3 | 39  | 0 | 100.0 |
| rrnAC0700 | SECE_HALMAReview | <i>secE</i>      | Preprotein translocase subunit secE (Protein transport protein SEC61gamma subunit homolog). | 12  | 9   | 21  | 1.3 | 21  | 0 | 100.0 |
| rrnAC3214 | Q5UXT6_HALMA     | <i>secF</i>      | Protein-export membrane protein SecF.                                                       | 8   | 10  | 18  | 0.8 | 18  | 0 | 100.0 |
| rrnAC2111 | SECG_HALMAReview | <i>secG</i>      | Preprotein translocase secG subunit (Protein transport protein SEC61subunit beta homolog).  | 11  | 6   | 17  | 1.8 | 17  | 0 | 100.0 |
| pNG5001   | Q5V7G3_HALMA     | <i>abcP-1</i>    | ABC transporter permease protein.                                                           | 8   | 9   | 17  | 0.9 | 17  | 0 | 100.0 |
| rrnAC0187 | Q5V5F2_HALMA     | <i>rrnAC0187</i> | Putative transporter.                                                                       | 6   | 7   | 13  | 0.9 | 13  | 0 | 100.0 |
| rrnAC0665 | Q5V483_HALMA     | <i>abcP-2</i>    | ABC transporter permease protein.                                                           | 5   | 5   | 10  | 1.0 | 10  | 0 | 100.0 |
| rrnAC0647 | Q5V4A0_HALMA     | <i>abcS-1</i>    | ABC transporter substrate-binding protein.                                                  | 2   | 7   | 9   | 0.3 | 9   | 0 | 100.0 |
| pNG7346   | Q5V612_HALMA     | <i>potD1</i>     | Spermidine/putrescine transporter substrate binding protein.                                | 2   | 7   | 9   | 0.3 | 9   | 0 | 100.0 |
| rrnAC3266 | Q5UXP1_HALMA     | <i>modB</i>      | Molybdenum ABC transporter permease protein.                                                | 4   | 4   | 8   | 1.0 | 8   | 0 | 100.0 |
| rrnAC2314 | Q5V015_HALMA     | <i>trp3</i>      | ABC transport protein.                                                                      | 2   | 1   | 3   | 2.0 | 3   | 0 | 100.0 |
| rrnAC2868 | Q5UYN5_HALMA     | <i>potD2</i>     | Spermidine/putrescine ABC transporter spermidine/putrescine bindingprotein.                 | 2   | 0   | 2   | ∞   | 2   | 0 | 100.0 |
