# Supplementary material
Source: PubMed Central journal article supplement (PMC3168985)
Supplement: NIHMS304204-supplement-14_si_014.pdf [file NIHMS304204-supplement-14_si_014.pdf]

**Supplementary Figure 1. Tandem mass spectra of the *H. marismortui* proteins identified with only a single unique peptide.** The gene locus name, peptide sequence, peptide probability, precursor charge, calculated neutral peptide mass, precursor neutral mass, mass difference, Xcorr, and deltaCN are indicated in the top right corner. *Top left panel:* MS/MS spectrum showing the matched b- and y-ions; *Bottom left panel:* MS/MS spectrum showing the m/z of the matched b- and y-ions. *Bottom right panel:* Table of highlighted matched b- and y-ions.

# rrnAC2681

## GGPAPDAVAEQVSVAVDALAADREVLADRR

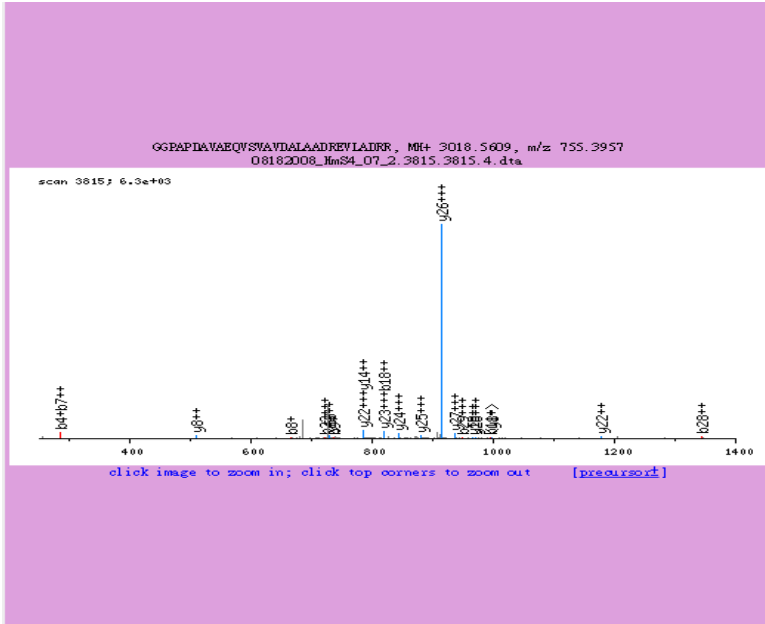

| Peptide prob. | Precursor charge | Calc neutral pep mass | Precursor neutral mass | Mass difference | Xcorr | Deltacn |
|---------------|------------------|-----------------------|------------------------|-----------------|-------|---------|
| 0.9998        | 4                | 3017.6                | 3018.6                 | 1.0181          | 1.981 | 0.182   |

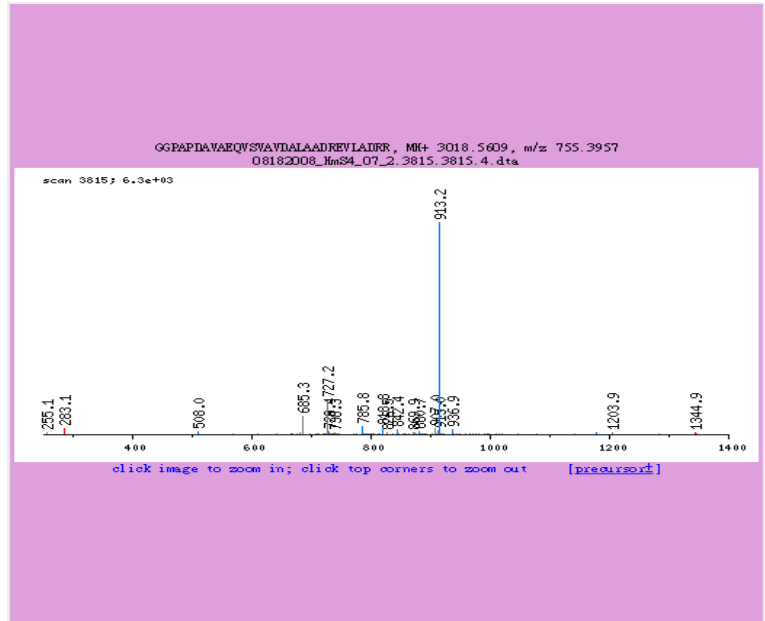

| b <sup>+</sup> | b <sup>2+</sup> | b <sup>3+</sup> | #  | AA | #  | y <sup>+</sup> | y <sup>2+</sup> | y <sup>3+</sup> |
|----------------|-----------------|-----------------|----|----|----|----------------|-----------------|-----------------|
| 58.0293        | 29.5186         | 20.0150         | 1  | G  | 30 |                |                 |                 |
| 115.0508       | 58.0293         | 39.0221         | 2  | G  | 29 | 2961.5394      | 1481.2736       | 987.8517        |
| 212.1035       | 106.5557        | 71.3731         | 3  | P  | 28 | 2904.5179      | 1452.7629       | 968.8445        |
| 283.1406       | 142.0742        | 95.0521         | 4  | A  | 27 | 2807.4652      | 1404.2365       | 936.4936        |
| 380.1934       | 190.6006        | 127.4030        | 5  | P  | 26 | 2736.4280      | 1368.7179       | 912.8146        |
| 495.2203       | 248.1141        | 165.7453        | 6  | D  | 25 | 2639.3753      | 1320.1916       | 880.4636        |
| 566.2575       | 283.6326        | 189.4244        | 7  | A  | 24 | 2524.3483      | 1262.6781       | 842.1213        |
| 665.3259       | 333.1668        | 222.4472        | 8  | V  | 23 | 2433.3112      | 1227.1595       | 818.4423        |
| 736.3630       | 368.6854        | 246.1262        | 9  | A  | 22 | 2354.2428      | 1177.6253       | 785.4195        |
| 865.4056       | 433.2067        | 289.1404        | 10 | E  | 21 | 2283.2057      | 1142.1068       | 761.7404        |
| 993.4641       | 497.2360        | 331.8266        | 11 | Q  | 20 | 2154.1631      | 1077.5855       | 718.7263        |
| 1092.5326      | 546.7702        | 364.8494        | 12 | V  | 19 | 2026.1045      | 1013.5562       | 676.0401        |
| 1179.5646      | 590.2862        | 393.8601        | 13 | S  | 18 | 1927.0361      | 964.0220        | 643.0173        |
| 1278.6330      | 639.8204        | 426.8829        | 14 | V  | 17 | 1840.0041      | 920.5060        | 614.0066        |
| 1349.6701      | 675.3390        | 450.5619        | 15 | A  | 16 | 1740.9357      | 870.9717        | 580.9838        |
| 1448.7385      | 724.8732        | 483.5847        | 16 | V  | 15 | 1669.8986      | 835.4532        | 557.3047        |
| 1563.7655      | 782.3867        | 521.9270        | 17 | D  | 14 | 1570.8301      | 785.9190        | 524.2819        |
| 1634.8026      | 817.9052        | 545.6061        | 18 | A  | 13 | 1455.8032      | 728.4055        | 485.9396        |
| 1747.8867      | 874.4472        | 583.3008        | 19 | L  | 12 | 1384.7661      | 692.8870        | 462.2606        |
| 1818.9238      | 909.9658        | 606.9798        | 20 | A  | 11 | 1271.6820      | 636.3449        | 424.5659        |
| 1889.9609      | 945.4844        | 630.6588        | 21 | A  | 10 | 1200.6449      | 600.8264        | 400.8869        |
| 2004.9878      | 1002.9978       | 669.0012        | 22 | D  | 9  | 1129.6078      | 565.3078        | 377.2078        |
| 2161.0889      | 1081.0484       | 721.0349        | 23 | R  | 8  | 1014.5809      | 507.7943        | 338.8655        |
| 2290.1315      | 1145.5697       | 764.0491        | 24 | E  | 7  | 858.4797       | 429.7438        | 286.8318        |
| 2389.1999      | 1195.1039       | 797.0719        | 25 | V  | 6  | 729.4371       | 365.2225        | 243.8176        |
| 2502.2840      | 1251.6459       | 834.7666        | 26 | L  | 5  | 630.3687       | 315.6883        | 210.7948        |
| 2573.3211      | 1287.1645       | 858.4456        | 27 | A  | 4  | 517.2847       | 259.1462        | 173.1001        |
| 2688.3481      | 1344.6779       | 896.7879        | 28 | D  | 3  | 446.2476       | 223.6277        | 149.4211        |
| 2844.4492      | 1422.7285       | 948.8216        | 29 | R  | 2  | 331.2206       | 166.1142        | 111.0788        |
|                |                 |                 | 30 | R  | 1  | 175.1195       | 88.0637         | 59.0451         |

SVVGDDAVPDAESVTAVPR, MH+ 2098.0304, m/z 1049.5188  
 08182008\_Im8S3\_12\_4\_21S3\_21S3\_2.dta

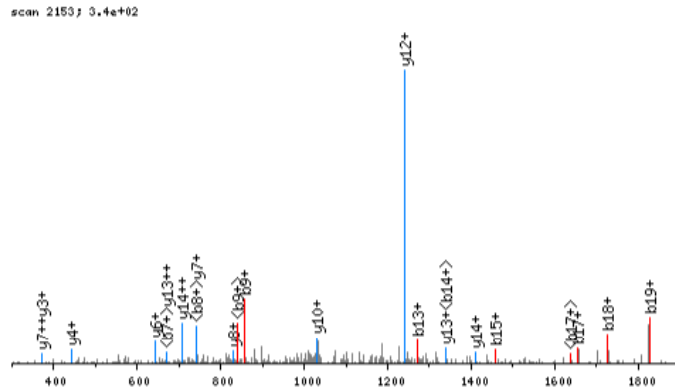

click image to zoom in; click top corners to zoom out [precursor±]

## rrnAC1938 SVVGDDAVPDAESVTAVPR

| Peptide prob. | Precursor charge | Calc neutral pep mass | Precursor neutral mass | Mass difference | Xcorr | Deltacn |
|---------------|------------------|-----------------------|------------------------|-----------------|-------|---------|
| 1             | 2                | 2097                  | 2098                   | 1.005           | 4.522 | 0.482   |

SVVGDDAVPDAESVTAVPR, MH+ 2098.0304, m/z 1049.5188  
 08182008\_Im8S3\_12\_4\_21S3\_21S3\_2.dta

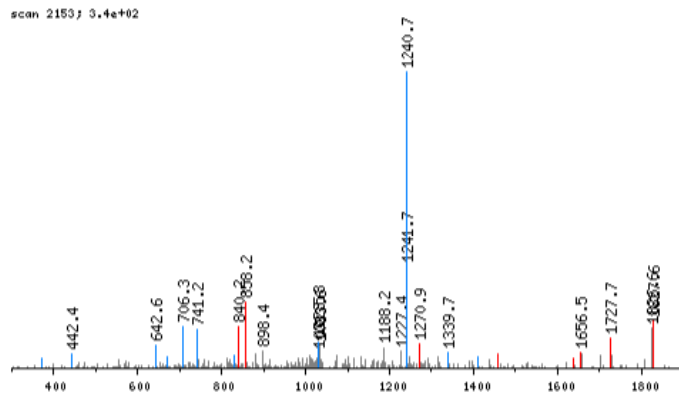

click image to zoom in; click top corners to zoom out [precursor±]

| b <sup>+</sup> | #  | AA | #  | y <sup>+</sup> | y <sup>2+</sup> |
|----------------|----|----|----|----------------|-----------------|
| 88.0399        | 1  | S  | 21 |                |                 |
| 187.1083       | 2  | V  | 20 | 2010.9984      | 1006.0031       |
| 286.1767       | 3  | V  | 19 | 1911.9300      | 956.4689        |
| 343.1981       | 4  | G  | 18 | 1812.8616      | 906.9347        |
| 458.2251       | 5  | D  | 17 | 1755.8401      | 878.4240        |
| 573.2520       | 6  | D  | 16 | 1640.8132      | 820.9105        |
| 688.2790       | 7  | D  | 15 | 1525.7862      | 763.3970        |
| 759.3161       | 8  | A  | 14 | 1410.7593      | 705.8835        |
| 858.3845       | 9  | V  | 13 | 1339.7222      | 670.3650        |
| 955.4373       | 10 | P  | 12 | 1240.6537      | 620.8308        |
| 1070.4642      | 11 | D  | 11 | 1143.6010      | 572.3044        |
| 1141.5013      | 12 | A  | 10 | 1028.5740      | 514.7909        |
| 1270.5439      | 13 | E  | 9  | 957.5369       | 479.2724        |
| 1357.5759      | 14 | S  | 8  | 828.4943       | 414.7511        |
| 1456.6444      | 15 | V  | 7  | 741.4623       | 371.2351        |
| 1557.6920      | 16 | T  | 6  | 642.3939       | 321.7009        |
| 1656.7605      | 17 | V  | 5  | 541.3462       | 271.1770        |
| 1727.7976      | 18 | A  | 4  | 442.2778       | 221.6428        |
| 1826.8660      | 19 | V  | 3  | 371.2407       | 166.1243        |
| 1923.9187      | 20 | P  | 2  | 272.1723       | 136.5900        |
|                | 21 | R  | 1  | 175.1195       | 88.0637         |

# rrnAC3286

## SIDNDDADSLAELFLYTADHAAHLSETVR PALNEGR

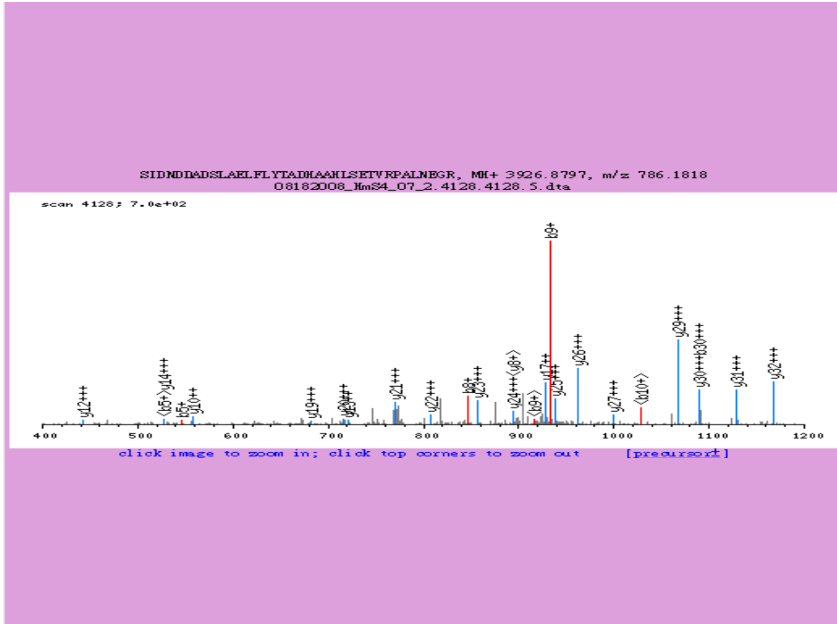

| Peptide prob. | Precursor charge | Calc neutral pep mass | Precursor neutral mass | Mass difference | Xcorr | Deltaen |
|---------------|------------------|-----------------------|------------------------|-----------------|-------|---------|
| 0.9999        | 5                | 3925.9                | 3925.9                 | 0.0201          | 3.367 | 0.133   |

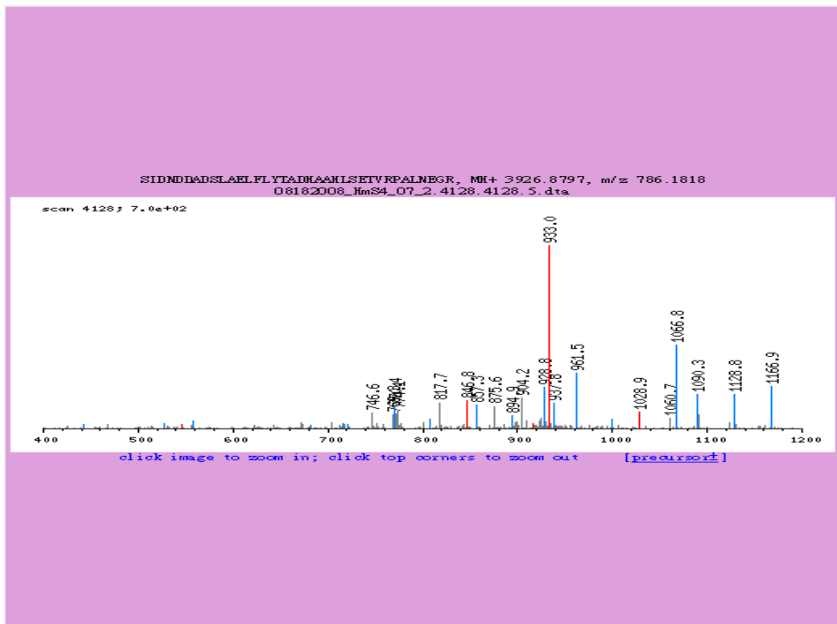

| b <sup>+</sup>  | b <sup>2+</sup> | b <sup>3+</sup>  | #  | AA | #  | y <sup>+</sup> | y <sup>2+</sup> | y <sup>3+</sup>  |
|-----------------|-----------------|------------------|----|----|----|----------------|-----------------|------------------|
| 88.0999         | 44.5298         | 30.0185          | 1  | S  | 96 |                |                 |                  |
| 201.1239        | 101.0659        | 67.7132          | 2  | I  | 95 | 3839.8477      | 1920.4277       | 1280.6211        |
| 316.1509        | 158.5793        | 106.0555         | 3  | D  | 94 | 3726.7636      | 1863.8857       | 1242.9264        |
| 430.1938        | 215.6008        | 144.0698         | 4  | N  | 93 | 3611.7966      | 1806.3722       | 1204.5841        |
| <b>545.2207</b> | 273.1143        | 182.4121         | 5  | D  | 92 | 3497.6937      | 1749.3508       | <b>1166.5698</b> |
| 660.2477        | 330.6277        | 220.7544         | 6  | D  | 91 | 3382.6668      | 1691.8373       | <b>1128.2275</b> |
| 731.2848        | 366.1463        | 244.4335         | 7  | A  | 90 | 3267.6398      | 1634.3238       | <b>1089.8852</b> |
| <b>846.3117</b> | 423.6598        | 282.7758         | 8  | D  | 89 | 3196.6027      | 1598.8053       | <b>1066.2061</b> |
| <b>933.3438</b> | 467.1758        | 311.7865         | 9  | S  | 88 | 3081.5758      | 1541.2918       | 1027.8638        |
| 1046.4278       | 523.7178        | 349.4812         | 10 | L  | 87 | 2994.5437      | 1497.7758       | <b>998.8531</b>  |
| 1117.4649       | 559.2364        | 373.1602         | 11 | A  | 86 | 2881.4597      | 1441.2338       | <b>961.1584</b>  |
| 1246.5075       | 623.7577        | 416.1744         | 12 | E  | 85 | 2810.4226      | 1405.7152       | <b>937.4794</b>  |
| 1359.5916       | 680.2997        | 453.8691         | 13 | L  | 84 | 2681.3800      | 1341.1939       | <b>894.4652</b>  |
| 1506.6600       | 753.8339        | 502.8919         | 14 | F  | 83 | 2568.2959      | 1284.6519       | <b>856.7705</b>  |
| 1619.7441       | 810.3759        | 540.5866         | 15 | L  | 82 | 2421.2275      | 1211.1177       | <b>807.7477</b>  |
| 1782.8074       | 891.9076        | 594.9410         | 16 | Y  | 81 | 2308.1434      | 1154.5756       | <b>770.0530</b>  |
| 1883.8551       | 942.4315        | 628.6236         | 17 | T  | 80 | 2145.0801      | 1073.0440       | <b>715.6986</b>  |
| 1954.8922       | 977.9500        | 652.3026         | 18 | A  | 79 | 2044.0324      | 1022.5201       | <b>682.0160</b>  |
| 2069.9191       | 1035.4635       | 690.6449         | 19 | D  | 78 | 1972.9953      | 987.0016        | 658.3370         |
| 2206.9780       | 1103.9929       | 736.3312         | 20 | H  | 77 | 1857.9684      | <b>929.4881</b> | 619.9947         |
| 2278.0152       | 1139.5115       | 760.0103         | 21 | A  | 76 | 1720.9095      | 860.9586        | 574.3084         |
| 2349.0523       | 1175.0301       | 783.6893         | 22 | A  | 75 | 1649.8723      | 825.4401        | 530.6293         |
| 2486.1112       | 1243.5595       | 829.3756         | 23 | H  | 74 | 1578.8352      | 789.9215        | <b>526.9503</b>  |
| 2599.1953       | 1300.1015       | 867.0703         | 24 | L  | 73 | 1441.7763      | <b>721.3921</b> | 481.2640         |
| 2686.2273       | 1343.6176       | 896.0810         | 25 | S  | 72 | 1328.6922      | 664.8500        | <b>443.5693</b>  |
| 2815.2699       | 1408.1388       | 939.0952         | 26 | E  | 71 | 1241.6602      | 621.3340        | 414.5586         |
| 2916.3176       | 1458.6627       | 972.7777         | 27 | T  | 70 | 1112.6176      | <b>556.8127</b> | 371.5444         |
| 3015.3860       | 1508.1969       | 1005.8005        | 28 | V  | 69 | 1011.5700      | 506.2889        | 337.8619         |
| 3171.4871       | 1586.2475       | 1057.8342        | 29 | R  | 68 | 912.5015       | 456.7547        | 304.8391         |
| 3268.5398       | 1634.7738       | <b>1090.1852</b> | 30 | P  | 67 | 756.4004       | 378.7041        | 252.8054         |
| 3339.5770       | 1670.2924       | 1113.8642        | 31 | A  | 66 | 659.3477       | 330.1777        | 220.4544         |
| 3452.6610       | 1726.8344       | 1151.5589        | 32 | L  | 65 | 588.3105       | 294.6592        | 196.7754         |
| 3566.7039       | 1783.8559       | 1189.5732        | 33 | N  | 64 | 475.2265       | 238.1172        | 159.0807         |
| 3695.7465       | 1848.3772       | 1232.5874        | 34 | E  | 63 | 361.1896       | 181.0957        | 121.0664         |
| 3752.7660       | 1876.8879       | 1251.5946        | 35 | G  | 62 | 232.1410       | 116.5744        | 78.0522          |
|                 |                 |                  | 36 | R  | 61 | 175.1195       | 88.0637         | 59.0451          |

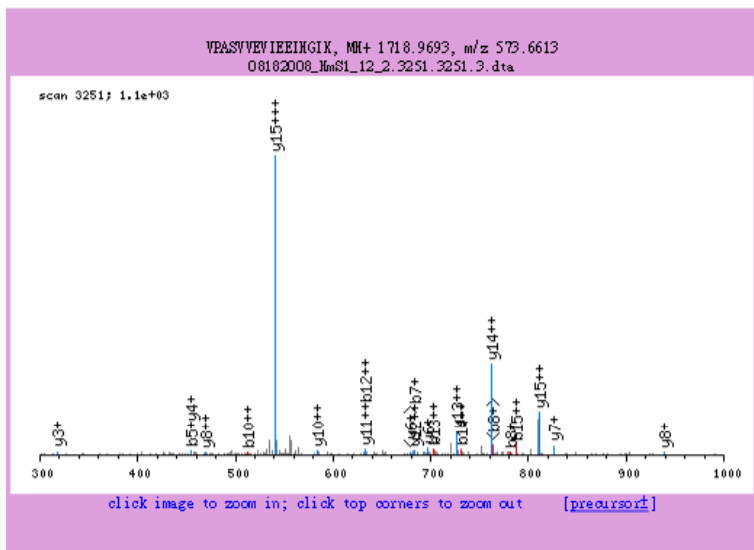

## rrnAC1913

### VPASVVEVIEEIHGK

| Peptide prob. | Precursor charge | Calc neutral pep mass | Precursor neutral mass | Mass difference | Xcorr | DeltaCn |
|---------------|------------------|-----------------------|------------------------|-----------------|-------|---------|
| 1             | 3                | 1718                  | 1718                   | 0.0029          | 3.243 | 0.292   |

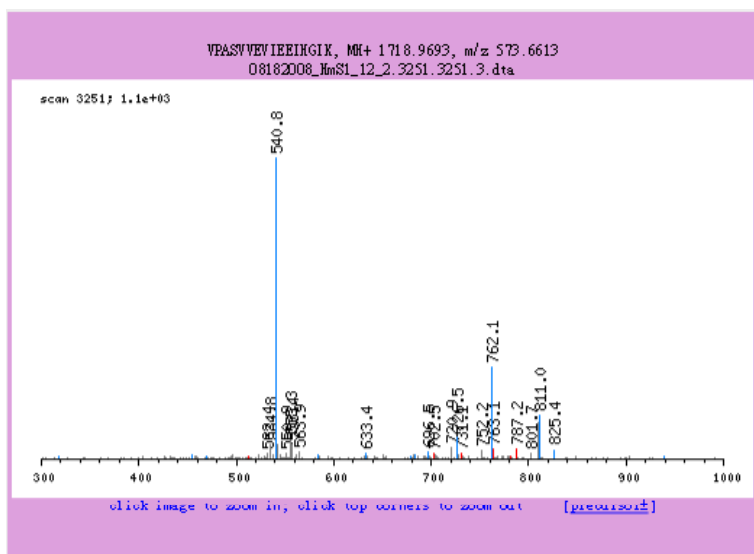

| b <sup>+</sup>  | b <sup>2+</sup> | # AA | # | y <sup>+</sup> | y <sup>2+</sup>                 | y <sup>3+</sup>                 |
|-----------------|-----------------|------|---|----------------|---------------------------------|---------------------------------|
| 100.0762        | 50.5420         | 1    | V | 16             |                                 |                                 |
| 197.1290        | 99.0684         | 2    | P | 15             | 1619.9008                       | <b>810.4543</b> <b>540.6388</b> |
| 268.1661        | 134.5870        | 3    | A | 14             | 1522.8481                       | <b>761.9280</b> 508.2879        |
| 355.1981        | 178.1030        | 4    | S | 13             | 1451.8110                       | <b>726.4094</b> 484.6089        |
| <b>454.2666</b> | 227.6372        | 5    | V | 12             | 1364.7789                       | <b>682.8934</b> 455.5982        |
| 553.3330        | 277.1714        | 6    | V | 11             | 1265.7105                       | <b>633.3592</b> 422.5754        |
| <b>682.3776</b> | 341.6927        | 7    | E | 10             | 1166.6421                       | <b>583.8250</b> 389.5526        |
| <b>781.4460</b> | 391.2269        | 8    | V | 9              | 1037.5995                       | 519.3037 346.5384               |
| 894.5300        | 447.7689        | 9    | I | 8              | <b>938.5311</b> <b>469.7695</b> | 313.5156                        |
| 1023.5726       | <b>512.2902</b> | 10   | E | 7              | <b>825.4470</b>                 | 413.2274 275.8209               |
| 1152.6152       | 576.8115        | 11   | E | 6              | <b>696.4044</b>                 | 348.7061 232.8067               |
| 1265.6993       | <b>633.3536</b> | 12   | I | 5              | 567.3619                        | 284.1848 189.7925               |
| 1402.7582       | <b>701.8830</b> | 13   | H | 4              | <b>454.2778</b>                 | 227.6428 152.0978               |
| 1459.7797       | <b>730.3937</b> | 14   | G | 3              | <b>317.2189</b>                 | 159.1134 106.4115               |
| 1572.8637       | <b>786.9358</b> | 15   | I | 2              | 280.1974                        | 130.6026 87.4044                |
|                 |                 | 16   | K | 1              | 147.1134                        | 74.0606 49.7097                 |

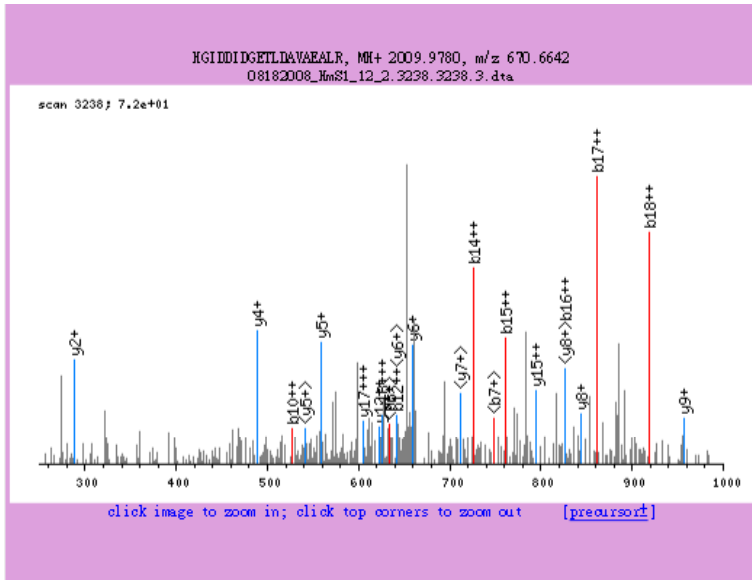

## rrnAC0470 HGIDDIDGETLDAVAEALR

| Peptide prob. | Precursor charge | Calc neutral pep mass | Precursor neutral mass | Mass difference | Xcorr | Deltacn |
|---------------|------------------|-----------------------|------------------------|-----------------|-------|---------|
| 0.9878        | 3                | 2009                  | 2009                   | -0.0119         | 2.381 | 0.103   |

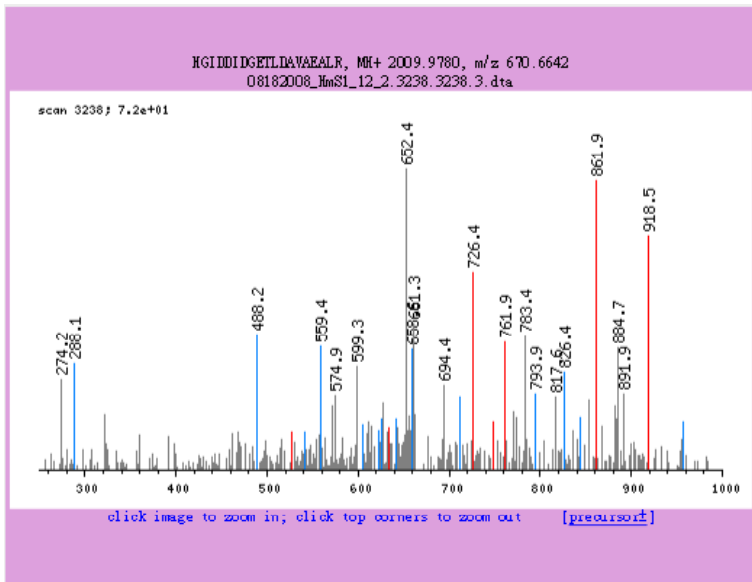

| b <sup>+</sup> | b <sup>2+</sup> | #  | AA | #  | y <sup>+</sup>  | y <sup>2+</sup> | y <sup>3+</sup> |
|----------------|-----------------|----|----|----|-----------------|-----------------|-----------------|
| 138.0667       | 69.5373         | 1  | H  | 19 |                 |                 |                 |
| 195.0882       | 98.0480         | 2  | G  | 18 | 1872.9191       | 936.9635        | <b>624.9782</b> |
| 308.1723       | 154.5900        | 3  | I  | 17 | 1815.8976       | 908.4527        | <b>605.9711</b> |
| 423.1992       | 212.1035        | 4  | D  | 16 | 1702.8135       | 851.9107        | 568.2764        |
| 538.2262       | 269.6170        | 5  | D  | 15 | 1587.7866       | <b>794.3972</b> | 529.9341        |
| 651.3102       | 326.1590        | 6  | I  | 14 | 1472.7597       | 736.8837        | 491.5918        |
| 766.3372       | 383.6725        | 7  | D  | 13 | 1359.6756       | 680.3417        | 453.8971        |
| 823.3586       | 412.1832        | 8  | G  | 12 | 1244.6487       | <b>622.8282</b> | 415.5548        |
| 952.4012       | 476.7045        | 9  | E  | 11 | 1187.6272       | 594.3175        | 396.5476        |
| 1053.4489      | <b>527.2284</b> | 10 | T  | 10 | 1058.5846       | 529.7962        | 353.5334        |
| 1166.5330      | 583.7704        | 11 | L  | 9  | <b>957.5369</b> | 479.2724        | 319.8509        |
| 1281.5599      | <b>641.2839</b> | 12 | D  | 8  | <b>844.4529</b> | 422.7303        | 282.1562        |
| 1332.5970      | 676.8024        | 13 | A  | 7  | 729.4259        | 365.2169        | 243.8139        |
| 1451.6654      | <b>726.3366</b> | 14 | V  | 6  | <b>658.3888</b> | 329.6983        | 220.1348        |
| 1522.7025      | <b>761.8552</b> | 15 | A  | 5  | <b>559.3204</b> | 280.1641        | 187.1120        |
| 1651.7451      | <b>826.3765</b> | 16 | E  | 4  | <b>488.2833</b> | 244.6455        | 163.4330        |
| 1722.7822      | <b>861.8950</b> | 17 | A  | 3  | 359.2407        | 180.1243        | 120.4188        |
| 1835.8663      | <b>918.4371</b> | 18 | L  | 2  | <b>288.2036</b> | 144.6057        | 96.7397         |
|                |                 | 19 | R  | 1  | 175.1195        | 88.0637         | 59.0451         |

TVYMAVPR, MI+ 936.4977, m/z 468.7525  
08182008\_ImS3\_07\_3.1746.1746.2.dta

scan 1746; 3.7e+02

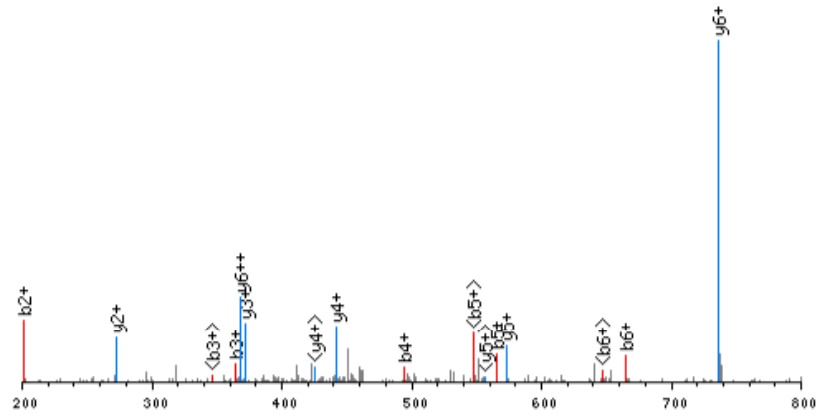

click image to zoom in; click top corners to zoom out [\[precursor†\]](#)

## rrnAC3378 TVYMAVPR

| Peptide prob. | Precursor charge | Calc neutral pep mass | Precursor neutral mass | Mass difference | Xcorr | Deltaen |
|---------------|------------------|-----------------------|------------------------|-----------------|-------|---------|
| 0.9991        | 2                | 935.49                | 935.49                 | 0.0019          | 1.935 | 0.143   |

TVYMAVPR, MI+ 936.4977, m/z 468.7525  
08182008\_ImS3\_07\_3.1746.1746.2.dta

scan 1746; 3.7e+02

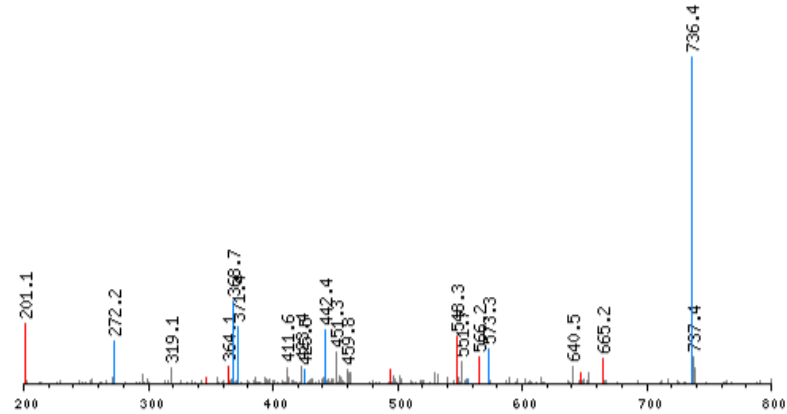

click image to zoom in; click top corners to zoom out [\[precursor†\]](#)

| b <sup>+</sup> | b <sup>2+</sup> | # AA | # | y <sup>+</sup> | y <sup>2+</sup> |
|----------------|-----------------|------|---|----------------|-----------------|
| 102.0555       | 51.5317         | 1    | T | 8              |                 |
| 201.1239       | 101.0639        | 2    | V | 7              | 835.4500        |
| 364.1872       | 182.5975        | 3    | Y | 6              | 736.3816        |
| 495.2277       | 248.1178        | 4    | M | 5              | 573.3183        |
| 566.2648       | 283.6363        | 5    | A | 4              | 442.2778        |
| 665.3333       | 333.1705        | 6    | V | 3              | 371.2407        |
| 762.3860       | 381.6969        | 7    | P | 2              | 272.1723        |
|                |                 | 8    | R | 1              | 175.1195        |
|                |                 |      |   |                | 88.0637         |

# rrnAC3088

## LVRPEGSGESAEALAASGDLDAALFTSSL

## TVEHFLDAAADLGLR

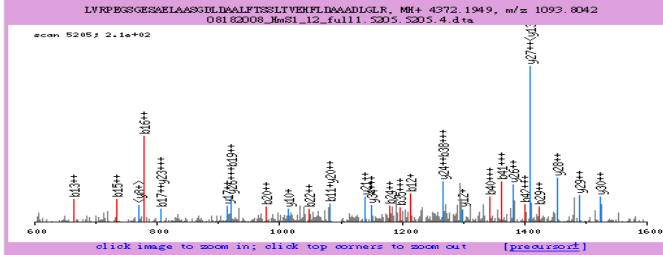

| Peptide prob. | Precursor charge | Calc neutral pep mass | Precursor neutral mass | Mass difference | Xcorr | DeltaCn |
|---------------|------------------|-----------------------|------------------------|-----------------|-------|---------|
| 0.999         | 4                | 4371.2                | 4372.2                 | 1.0103          | 3.706 | 0.046   |

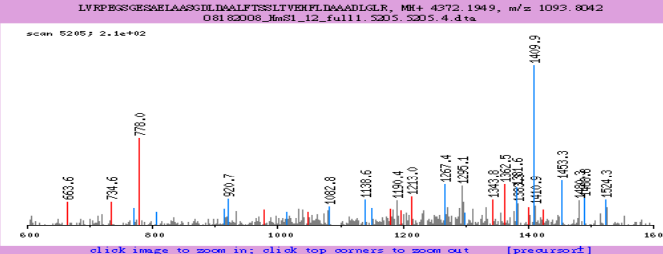

| b <sup>+</sup> | b <sup>2+</sup> | b <sup>3+</sup> | #           | AA          | # | y <sup>+</sup> | y <sup>2+</sup> | y <sup>3+</sup> |      |      |      |      |
|----------------|-----------------|-----------------|-------------|-------------|---|----------------|-----------------|-----------------|------|------|------|------|
| 114            | 0919            | 57              | 3499        | 38          | R | 25             | 4259            | 1108            | 2130 | 0593 | 1430 | 3755 |
| 213            | 1839            | 107             | 0841        | 71          | T | 23             | 4160            | 0424            | 2080 | 5251 | 1387 | 3527 |
| 369            | 2614            | 185             | 1946        | 123         | R | 41             | 4003            | 9413            | 2002 | 4746 | 1335 | 3190 |
| 466            | 3142            | 239             | 6610        | 156         | P | 40             | 3906            | 8885            | 1953 | 9482 | 1302 | 9681 |
| 595            | 3568            | 298             | 1823        | 199         | E | 39             | 3777            | 8459            | 1889 | 4269 | 1259 | 9539 |
| 652            | 3782            | 326             | 6930        | 218         | G | 38             | 3720            | 8245            | 1860 | 9161 | 1240 | 9467 |
| 739            | 4103            | 370             | 2090        | 247         | S | 37             | 3633            | 7924            | 1817 | 4001 | 1211 | 9360 |
| 796            | 4317            | 398             | 7198        | 266         | G | 36             | 3576            | 7710            | 1788 | 8894 | 1192 | 9289 |
| 925            | 4743            | 463             | 2411        | 309         | S | 35             | 3447            | 7284            | 1724 | 3681 | 1149 | 9147 |
| 1012           | 5063            | 506             | 7571        | 338         | S | 34             | 3360            | 6963            | 1680 | 8521 | 1120 | 9040 |
| <b>1089</b>    | <b>5435</b>     | 542             | 2756        | 361         | A | 33             | 3289            | 6593            | 1645 | 3335 | 1097 | 8923 |
| <b>1212</b>    | <b>5861</b>     | 606             | 7069        | 404         | R | 32             | 3160            | 6166            | 1580 | 8122 | 1054 | 8718 |
| 1325           | 6301            | <b>663</b>      | <b>3390</b> | 442         | L | 31             | 3047            | 5726            | 1524 | 2702 | 1016 | 8561 |
| 1396           | 7072            | 698             | 8575        | 466         | A | 30             | 2976            | 4955            | 1488 | 7516 | 992  | 8370 |
| 1467           | 7443            | <b>734</b>      | <b>3761</b> | 489         | A | 29             | 2905            | 4583            | 1453 | 2331 | 969  | 8180 |
| 1554           | 7764            | <b>777</b>      | <b>8921</b> | 518         | S | 28             | 2818            | 4263            | 1409 | 7171 | 940  | 8023 |
| 1611           | 7978            | <b>806</b>      | <b>4028</b> | 537         | G | 27             | 2761            | 4049            | 1381 | 2063 | 921  | 7866 |
| 1726           | 8248            | 863             | 9163        | 576         | D | 26             | 2646            | 3779            | 1323 | 6929 | 882  | 7979 |
| 1839           | 9088            | <b>920</b>      | <b>4583</b> | 613         | L | 25             | 2533            | 2938            | 1267 | 1508 | 845  | 7832 |
| 1954           | 9358            | <b>977</b>      | <b>9718</b> | 652         | D | 24             | 2418            | 2669            | 1209 | 6374 | 806  | 7609 |
| 2025           | 9729            | 1013            | 4904        | 675         | A | 23             | 2347            | 2298            | 1174 | 1188 | 783  | 7481 |
| 2097           | 0100            | <b>1049</b>     | <b>0089</b> | 699         | A | 22             | 2216            | 1827            | 1138 | 6092 | 759  | 7028 |
| 2210           | 0941            | 1105            | 5510        | 737         | R | 21             | 2016            | 0402            | 1008 | 5240 | 672  | 6853 |
| 2357           | 1625            | <b>1179</b>     | <b>0852</b> | 786         | F | 20             | 1914            | 9925            | 958  | 0002 | 639  | 0027 |
| 2458           | 2102            | 1229            | 6990        | 820         | T | 19             | 1827            | 9605            | 914  | 4842 | 609  | 9920 |
| 2545           | 2422            | 1273            | 1230        | 849         | S | 18             | 1740            | 9285            | 870  | 9681 | 580  | 9814 |
| 2632           | 2742            | 1316            | 6410        | 878         | S | 17             | 1627            | 8444            | 814  | 4261 | 543  | 2867 |
| 2745           | 3583            | 1373            | 1831        | 915         | L | 16             | 1526            | 7967            | 763  | 9023 | 509  | 6041 |
| 2846           | 4060            | <b>1423</b>     | <b>7069</b> | 949         | T | 15             | 1427            | 7283            | 714  | 3681 | 476  | 5813 |
| 2945           | 4744            | 1473            | 2411        | 982         | V | 14             | 1327            | 6601            | 649  | 8468 | 433  | 5671 |
| 3074           | 5170            | 1537            | 7624        | 1025        | E | 13             | 1216            | 6260            | 581  | 3173 | 397  | 8806 |
| 3211           | 5759            | 1606            | 2919        | 1071        | R | 12             | 1114            | 5584            | 907  | 7831 | 338  | 8500 |
| 3358           | 6443            | 1679            | 8261        | 1120        | F | 11             | 901             | 4743            | 451  | 2411 | 301  | 1633 |
| 3471           | 7284            | 1736            | 3681        | 1157        | L | 10             | 814             | 4261            | 543  | 2867 | 509  | 6041 |
| 3586           | 7553            | 1793            | 8816        | <b>1196</b> | D | 9              | 786             | 4474            | 393  | 7276 | 262  | 8210 |
| 3657           | 7924            | 1829            | 4001        | 1219        | A | 8              | 715             | 4103            | 358  | 2090 | 239  | 1420 |
| 3728           | 8295            | 1864            | 9187        | 1243        | A | 7              | 644             | 3731            | 322  | 6905 | 215  | 4629 |
| 3799           | 8667            | 1900            | 4372        | <b>1267</b> | A | 6              | 573             | 3360            | 287  | 1719 | 191  | 7839 |
| 3914           | 8936            | 1957            | 9507        | 1305        | D | 5              | 458             | 3091            | 229  | 6585 | 153  | 4416 |
| 4027           | 9777            | 2014            | 4927        | <b>1343</b> | L | 4              | 345             | 2250            | 173  | 1164 | 115  | 7469 |
| 4084           | 9991            | 2043            | 0035        | <b>1362</b> | G | 3              | 288             | 2036            | 144  | 6057 | 96   | 7397 |
| 4198           | 0632            | 2099            | 5455        | <b>1400</b> | L | 2              | 175             | 1195            | 88   | 0637 | 59   | 0451 |
|                |                 |                 |             | <b>43</b>   | R | 1              |                 |                 |      |      |      |      |



NYEAILDHAVETGVDR, MH+ 1801.8721, m/z 601.2955  
20081001M4\_516\_690.02121.02121.3.dta

scan 2121; 9.2e+02

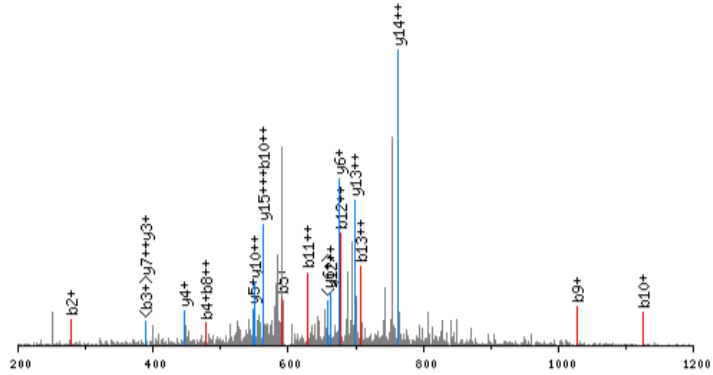

click image to zoom in; click top corners to zoom out [precursor]

## rrnAC2998 NYEAILDHAVETGVDR

| Peptide prob. | Precursor charge | Calc neutral pep mass | Precursor neutral mass | Mass difference | Xcorr | DeltaCn |
|---------------|------------------|-----------------------|------------------------|-----------------|-------|---------|
| 1             | 3                | 1800.9                | 1800.9                 | 0.002192        | 2.972 | 0.349   |

NYEAILDHAVETGVDR, MH+ 1801.8721, m/z 601.2955  
20081001M4\_516\_690.02121.02121.3.dta

scan 2121; 9.2e+02

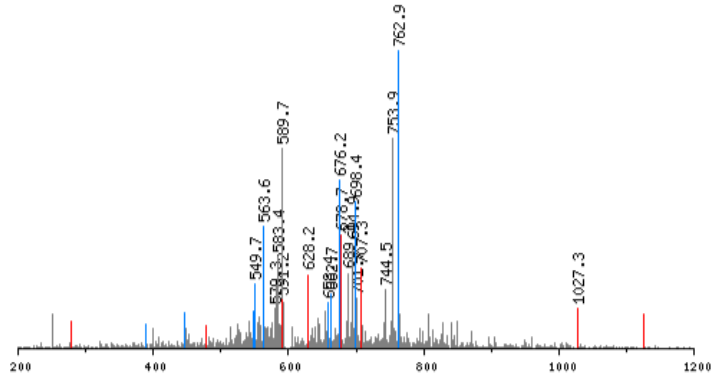

click image to zoom in; click top corners to zoom out [precursor]

| b <sup>+</sup>   | b <sup>2+</sup> | #  | AA | #  | y <sup>+</sup>  | y <sup>2+</sup> | y <sup>3+</sup> |
|------------------|-----------------|----|----|----|-----------------|-----------------|-----------------|
| 115.0308         | 58.0293         | 1  | N  | 16 |                 |                 |                 |
| <b>278.1141</b>  | 139.5610        | 2  | Y  | 15 | 1687.8291       | 844.4185        | <b>563.2816</b> |
| 407.1567         | 204.0822        | 3  | E  | 14 | 1524.7658       | <b>762.8868</b> | 508.9272        |
| <b>478.1938</b>  | 239.6008        | 4  | A  | 13 | 1395.7232       | <b>698.3655</b> | 465.9130        |
| <b>591.2779</b>  | 296.1428        | 5  | I  | 12 | 1324.6861       | <b>662.8470</b> | 442.2339        |
| 704.3619         | 352.6849        | 6  | L  | 11 | 1211.6020       | 606.3049        | 404.5392        |
| 819.3889         | 410.1983        | 7  | D  | 10 | 1098.5180       | <b>549.7629</b> | 366.8445        |
| 956.4478         | <b>478.7278</b> | 8  | H  | 9  | 983.4910        | 492.2494        | 328.5022        |
| <b>1027.4849</b> | 514.2464        | 9  | A  | 8  | 846.4321        | 423.7200        | 282.8159        |
| <b>1126.5533</b> | <b>563.7806</b> | 10 | V  | 7  | 775.3950        | <b>388.2014</b> | 259.1369        |
| 1255.5959        | <b>628.3019</b> | 11 | E  | 6  | <b>676.3266</b> | 338.6672        | 226.1141        |
| 1356.6436        | <b>678.8257</b> | 12 | T  | 5  | <b>547.2840</b> | 274.1459        | 183.0999        |
| 1413.6630        | <b>707.3364</b> | 13 | G  | 4  | <b>446.2363</b> | 223.6221        | 149.4173        |
| 1512.7334        | 756.8706        | 14 | V  | 3  | <b>389.2149</b> | 195.1113        | 130.4102        |
| 1627.7804        | 814.3841        | 15 | D  | 2  | 290.1464        | 145.5771        | 97.3874         |
|                  |                 | 16 | R  | 1  | 175.1195        | 88.0637         | 59.0451         |

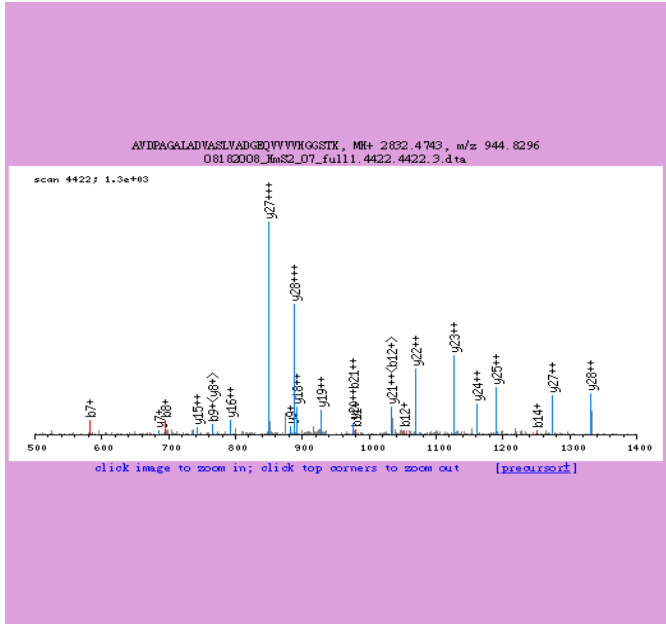

## rrnAC2676

### AVDPAGALADVASLVADGEQVVVVHGGSTK

| Peptide prob. | Precursor charge | Calc neutral pep mass | Precursor neutral mass | Mass difference | Xcorr | DeltaCn |
|---------------|------------------|-----------------------|------------------------|-----------------|-------|---------|
| 1             | 3                | 2831.5                | 2831.5                 | 0.0199          | 4.67  | 0.521   |

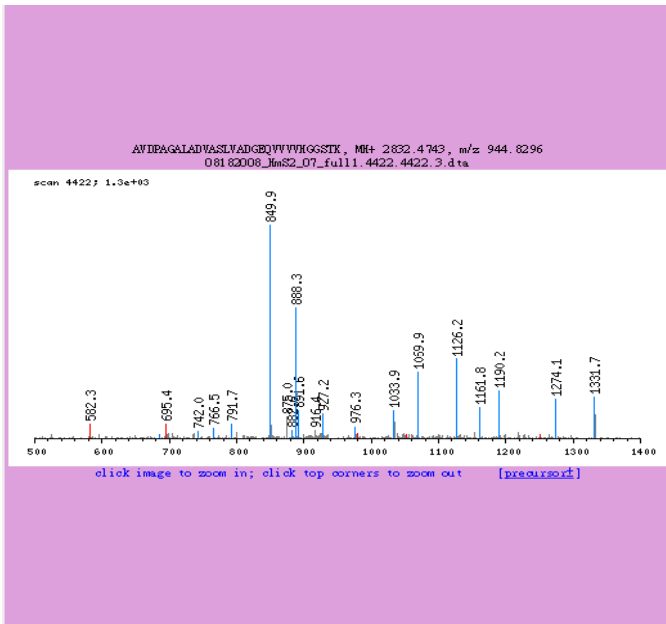

| b <sup>+</sup>   | b <sup>2+</sup> | #  | AA | #  | y <sup>+</sup>  | y <sup>2+</sup>  | y <sup>3+</sup> |
|------------------|-----------------|----|----|----|-----------------|------------------|-----------------|
| 72.0449          | 36.5264         | 1  | A  | 30 |                 |                  |                 |
| 171.1134         | 86.0606         | 2  | V  | 29 | 2761.4372       | 1381.2225        | 921.1510        |
| 286.1403         | 143.5741        | 3  | D  | 28 | 2662.3688       | <b>1331.6883</b> | <b>888.1281</b> |
| 383.1931         | 192.1004        | 4  | P  | 27 | 2547.3419       | <b>1274.1748</b> | <b>849.7858</b> |
| 454.2302         | 227.6190        | 5  | A  | 26 | 2450.2891       | 1225.6485        | 817.4349        |
| 511.2516         | 256.1297        | 6  | G  | 25 | 2379.2520       | <b>1190.1299</b> | 793.7559        |
| <b>582.2888</b>  | 291.6483        | 7  | A  | 24 | 2322.2305       | <b>1161.6192</b> | 774.7487        |
| <b>695.3728</b>  | 348.1903        | 8  | L  | 23 | 2251.1934       | <b>1126.1006</b> | 751.0697        |
| <b>766.4099</b>  | 383.7089        | 9  | A  | 22 | 2138.1093       | <b>1069.5586</b> | 713.3750        |
| 881.4369         | 441.2223        | 10 | D  | 21 | 2067.0722       | <b>1034.0400</b> | 689.6960        |
| <b>980.5053</b>  | 490.7566        | 11 | V  | 20 | 1952.0453       | <b>976.5266</b>  | 651.3536        |
| <b>1051.5424</b> | 526.2751        | 12 | A  | 19 | 1852.9769       | <b>926.9923</b>  | 618.3308        |
| 1138.5744        | 569.7911        | 13 | S  | 18 | 1781.9398       | <b>891.4738</b>  | 594.6518        |
| <b>1251.6585</b> | 626.3332        | 14 | L  | 17 | 1694.9077       | 847.9578         | 565.6411        |
| 1350.7269        | 675.8674        | 15 | V  | 16 | 1581.8237       | <b>791.4157</b>  | 527.9464        |
| 1421.7640        | 711.3859        | 16 | A  | 15 | 1482.7552       | <b>741.8815</b>  | 494.9236        |
| 1536.7910        | 768.8994        | 17 | D  | 14 | 1411.7181       | 706.3630         | 471.2446        |
| 1593.8124        | 797.4101        | 18 | G  | 13 | 1296.6912       | 648.8495         | 432.9023        |
| 1722.8530        | 861.9314        | 19 | E  | 12 | 1239.6697       | 620.3988         | 413.8951        |
| 1850.9136        | 925.9607        | 20 | Q  | 11 | 1110.6271       | 555.8175         | 370.8809        |
| 1949.9820        | <b>975.4949</b> | 21 | V  | 10 | 982.5686        | 491.7882         | 328.1947        |
| 2049.0504        | 1025.0291       | 22 | V  | 9  | <b>883.5001</b> | 442.2540         | 295.1719        |
| 2148.1188        | 1074.5633       | 23 | V  | 8  | 784.4317        | 392.7198         | 262.1491        |
| 2247.1873        | 1124.0975       | 24 | V  | 7  | <b>685.3633</b> | 343.1856         | 229.1263        |
| 2384.2462        | 1192.6270       | 25 | I  | 6  | 586.2949        | 293.6514         | 196.1035        |
| 2441.2676        | 1221.1377       | 26 | G  | 5  | 449.2360        | 225.1219         | 150.4172        |
| 2498.2891        | 1249.6485       | 27 | G  | 4  | 392.2145        | 196.6112         | 131.4101        |
| 2585.3211        | 1293.1645       | 28 | S  | 3  | 335.1931        | 168.1004         | 112.4029        |
| 2686.3688        | 1343.6883       | 29 | T  | 2  | 248.1610        | 124.5844         | 83.3922         |
|                  |                 | 30 | K  | 1  | 147.1134        | 74.0606          | 49.7097         |

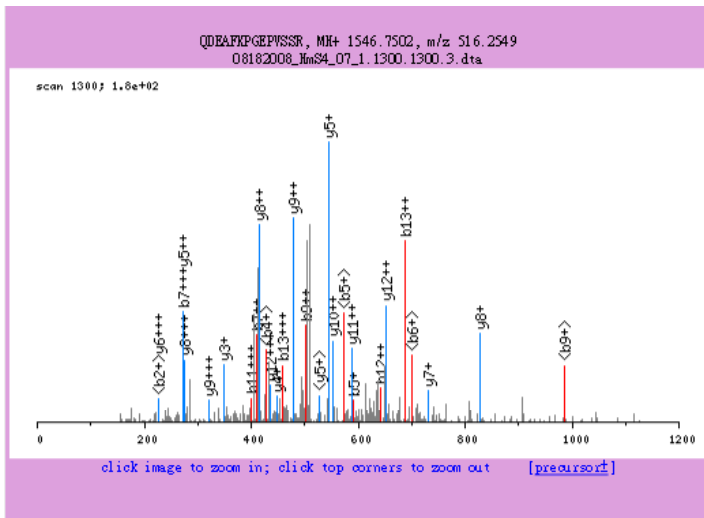

## rrnAC2630

### QDEAFKPGEPVSSR

| Peptide prob. | Precursor charge | Calc neutral pep mass | Precursor neutral mass | Mass difference | Xcorr | Deltacn |
|---------------|------------------|-----------------------|------------------------|-----------------|-------|---------|
| 0.9994        | 3                | 1545.7                | 1545.7                 | 0.0015          | 2.625 | 0.161   |

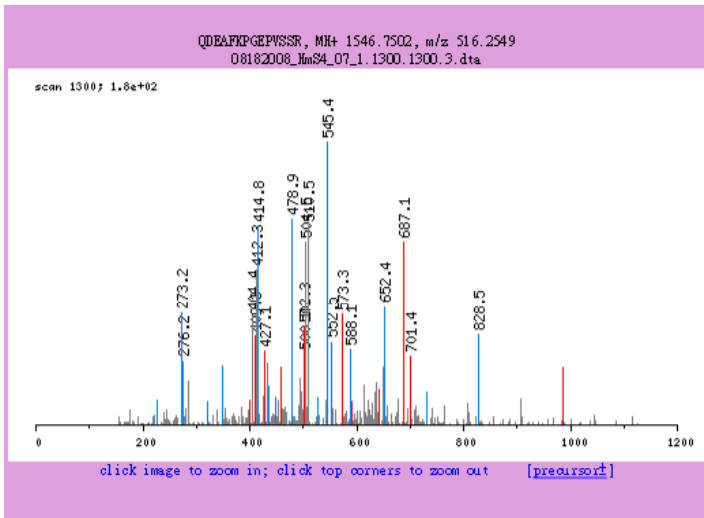

| b <sup>+</sup> | b <sup>2+</sup> | b <sup>3+</sup> | #  | AA | #  | y <sup>+</sup> | y <sup>2+</sup> | y <sup>3+</sup> |
|----------------|-----------------|-----------------|----|----|----|----------------|-----------------|-----------------|
| 129.0664       | 65.0371         | 43.6940         | 1  | Q  | 14 |                |                 |                 |
| 244.0933       | 122.5506        | 82.0963         | 2  | D  | 13 | 1418.6916      | 709.8497        | 473.5691        |
| 373.1359       | 187.0719        | 125.0305        | 3  | E  | 12 | 1303.6646      | 652.3962        | 435.2268        |
| 444.1731       | 222.5904        | 148.7296        | 4  | A  | 11 | 1174.6220      | 587.8149        | 392.2126        |
| 591.2415       | 296.1246        | 197.7524        | 5  | F  | 10 | 1103.5849      | 552.2964        | 368.5335        |
| 719.3364       | 360.1721        | 240.4507        | 6  | K  | 9  | 956.5165       | 478.7622        | 319.5107        |
| 816.3892       | 408.6985        | 272.8016        | 7  | P  | 8  | 828.4216       | 414.7147        | 276.8124        |
| 873.4107       | 437.2092        | 291.8088        | 8  | G  | 7  | 731.3688       | 366.1883        | 244.4615        |
| 1002.4533      | 501.7305        | 334.8230        | 9  | E  | 6  | 674.3473       | 337.6776        | 225.4543        |
| 1099.5060      | 550.2569        | 367.1739        | 10 | P  | 5  | 545.3047       | 273.1563        | 182.4401        |
| 1198.5744      | 599.7911        | 400.1967        | 11 | V  | 4  | 448.2520       | 224.6299        | 150.0892        |
| 1285.6065      | 643.3071        | 429.2074        | 12 | S  | 3  | 349.1836       | 175.0957        | 117.0664        |
| 1372.6385      | 686.8232        | 458.2180        | 13 | S  | 2  | 262.1515       | 131.5797        | 88.0557         |
|                |                 |                 | 14 | R  | 1  | 175.1195       | 88.0637         | 59.0451         |

VDLGDAWFLLR, MH+ 1304.7003, m/z 652.8538  
08182008\_Xms2\_07\_2.3643.3643.2.dta

scan 3643; 2.7e+03

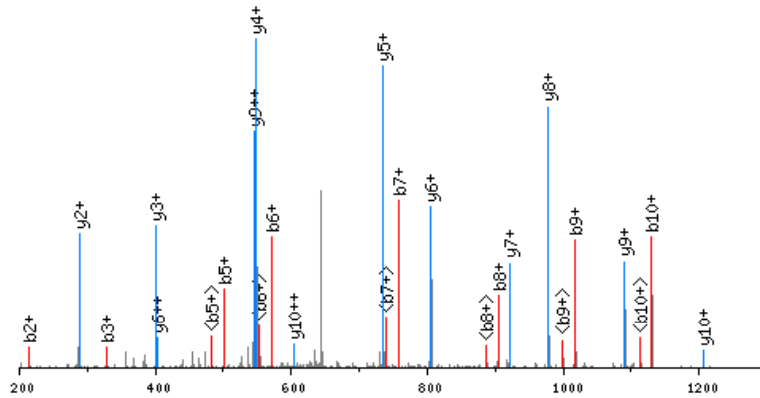

click image to zoom in; click top corners to zoom out [\[precursor!\]](#)

## rrnAC2574 VDLGDAWFLLR

| Peptide prob. | Precursor charge | Calc neutral pep mass | Precursor neutral mass | Mass difference | Xcorr | DeltaCn |
|---------------|------------------|-----------------------|------------------------|-----------------|-------|---------|
| 1             | 2                | 1303.7                | 1303.7                 | 0.0009          | 4.365 | 0.432   |

VDLGDAWFLLR, MH+ 1304.7003, m/z 652.8538  
08182008\_Xms2\_07\_2.3643.3643.2.dta

scan 3643; 2.7e+03

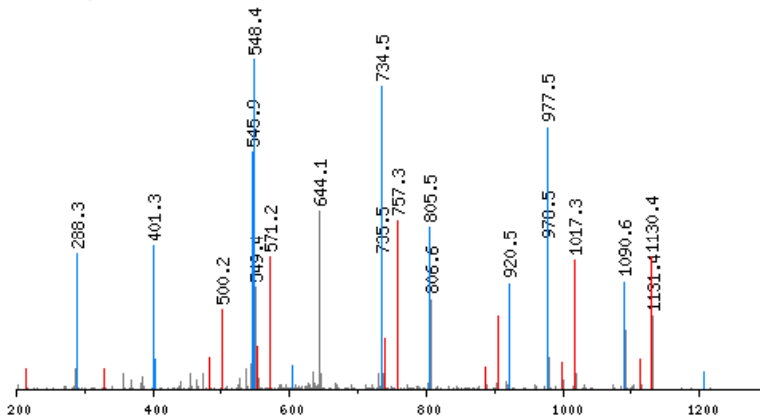

click image to zoom in; click top corners to zoom out [\[precursor!\]](#)

| b <sup>+</sup> | #  | AA | #  | y <sup>+</sup> | y <sup>2+</sup> |
|----------------|----|----|----|----------------|-----------------|
| 100.0762       | 1  | V  | 11 |                |                 |
| 215.1032       | 2  | D  | 10 | 1205.6319      | 603.3199        |
| 328.1872       | 3  | L  | 9  | 1090.6049      | 545.8064        |
| 385.2087       | 4  | G  | 8  | 977.5209       | 489.2644        |
| 500.2357       | 5  | D  | 7  | 920.4994       | 460.7536        |
| 571.2728       | 6  | A  | 6  | 805.4725       | 403.2401        |
| 757.3521       | 7  | W  | 5  | 734.4354       | 367.7216        |
| 904.4205       | 8  | F  | 4  | 548.3560       | 274.6819        |
| 1017.5046      | 9  | L  | 3  | 401.2876       | 201.1477        |
| 1130.5886      | 10 | L  | 2  | 288.2036       | 144.6057        |
|                | 11 | R  | 1  | 175.1195       | 88.0637         |

SLVTFGETALR, MH+ 1193.6530, m/z 597.3301  
08182008\_HmS1\_12\_2.2603.2603.2.dta

scan 2603: 6.4e+02

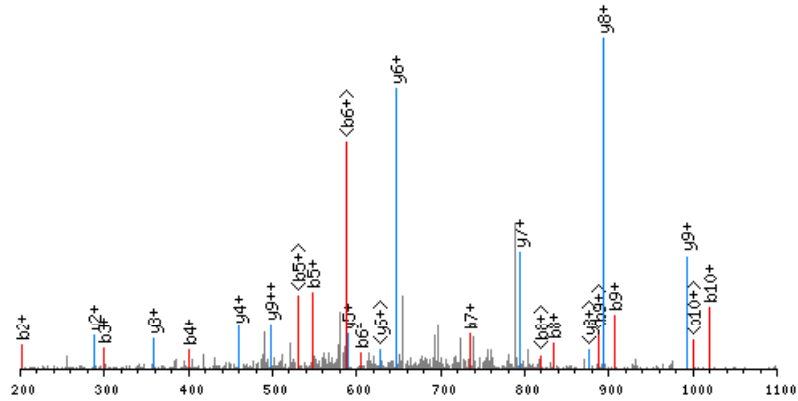

click image to zoom in; click top corners to zoom out [\[precursor\]](#)

## rrnAC2551 SLVTFGETALR

| Peptide prob. | Precursor charge | Calc neutral pep mass | Precursor neutral mass | Mass difference | Xcorr | DeltaCn |
|---------------|------------------|-----------------------|------------------------|-----------------|-------|---------|
| 0.9998        | 2                | 1192.6                | 1192.6                 | 0.0014          | 2.845 | 0.442   |

SLVTFGETALR, MH+ 1193.6530, m/z 597.3301  
08182008\_HmS1\_12\_2.2603.2603.2.dta

scan 2603: 6.4e+02

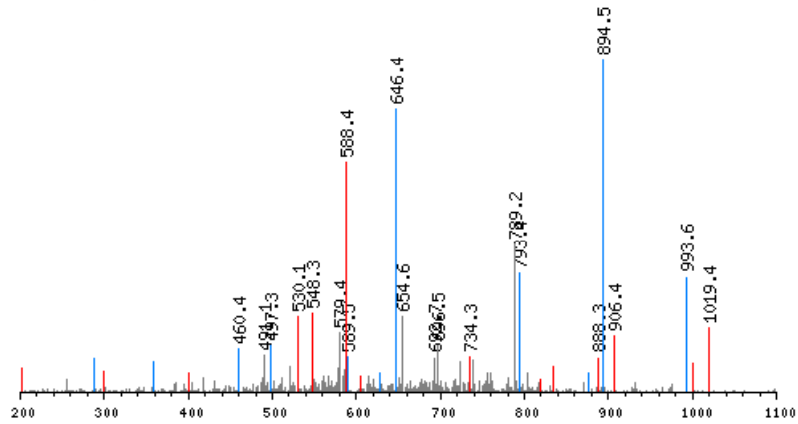

click image to zoom in; click top corners to zoom out [\[precursor\]](#)

| b <sup>+</sup> | #  | AA | #  | y <sup>+</sup> | y <sup>2+</sup> |
|----------------|----|----|----|----------------|-----------------|
| 88.0399        | 1  | S  | 11 |                |                 |
| 201.1239       | 2  | L  | 10 | 1106.6210      | 553.8144        |
| 300.1923       | 3  | V  | 9  | 993.5369       | 497.2724        |
| 401.2400       | 4  | T  | 8  | 894.4685       | 447.7382        |
| 548.3084       | 5  | F  | 7  | 793.4208       | 397.2143        |
| 605.3299       | 6  | G  | 6  | 646.3524       | 323.6801        |
| 734.3725       | 7  | E  | 5  | 589.3310       | 295.1694        |
| 835.4202       | 8  | T  | 4  | 460.2884       | 230.6481        |
| 906.4573       | 9  | A  | 3  | 359.2407       | 180.1243        |
| 1019.5413      | 10 | L  | 2  | 288.2036       | 144.6057        |
|                | 11 | R  | 1  | 175.1195       | 88.0637         |

AVNDAAPKDPVTGTR, MH+ 1511.7818, m/z 504.5988  
08182008\_HmS2\_07\_1\_0974.0974.3.dta

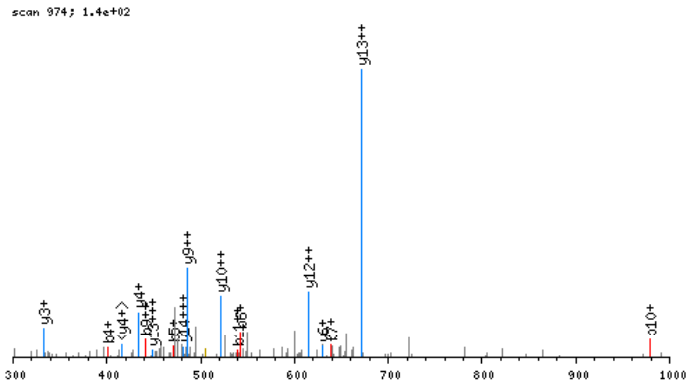

click image to zoom in; click top corners to zoom out [precursor]

## rrnAC2470 AVNDAAPKDPVTGTR

| Peptide prob. | Precursor charge | Calc neutral pep mass | Precursor neutral mass | Mass difference | Xcorr | Deltacn |
|---------------|------------------|-----------------------|------------------------|-----------------|-------|---------|
| 0.9998        | 3                | 1510.8                | 1510.8                 | 0.0043          | 2.088 | 0.297   |

AVNDAAPKDPVTGTR, MH+ 1511.7818, m/z 504.5988  
08182008\_HmS2\_07\_1\_0974.0974.3.dta

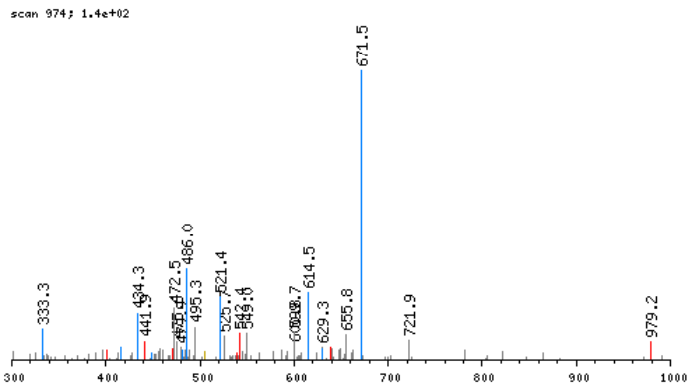

click image to zoom in; click top corners to zoom out [precursor]

| b <sup>+</sup>  | b <sup>2+</sup> | #  | AA | #  | y <sup>+</sup>  | y <sup>2+</sup> | y <sup>3+</sup> |
|-----------------|-----------------|----|----|----|-----------------|-----------------|-----------------|
| 72.0449         | 36.5264         | 1  | A  | 15 |                 |                 |                 |
| 171.1134        | 86.0606         | 2  | V  | 14 | 1440.7447       | 720.8763        | <b>480.9201</b> |
| 285.1563        | 143.0821        | 3  | N  | 13 | 1341.6763       | <b>671.3420</b> | <b>447.8973</b> |
| <b>400.1832</b> | 200.5955        | 4  | D  | 12 | 1227.6333       | <b>614.3206</b> | 409.8830        |
| <b>471.2203</b> | 236.1141        | 5  | A  | 11 | 1112.6064       | 556.8071        | 371.5407        |
| <b>542.2575</b> | 271.6326        | 6  | A  | 10 | 1041.5693       | <b>521.2886</b> | 347.8616        |
| <b>639.3102</b> | 320.1590        | 7  | P  | 9  | 970.5322        | <b>485.7700</b> | 324.1826        |
| 767.4052        | 384.2065        | 8  | K  | 8  | 873.4794        | 437.2436        | 291.8317        |
| 882.4321        | <b>441.7200</b> | 9  | D  | 7  | 745.3844        | 373.1961        | 249.1334        |
| <b>979.4849</b> | 490.2464        | 10 | P  | 6  | <b>630.3575</b> | 315.6827        | 210.7910        |
| 1078.5533       | <b>539.7806</b> | 11 | V  | 5  | 533.3047        | 267.1563        | 178.4401        |
| 1179.6010       | 590.3044        | 12 | T  | 4  | <b>434.2363</b> | 217.6221        | 145.4173        |
| 1236.6224       | 618.8151        | 13 | G  | 3  | <b>333.1886</b> | 167.0982        | 111.7348        |
| 1337.6701       | 669.3390        | 14 | T  | 2  | 276.1672        | 138.5875        | 92.7276         |
|                 |                 | 15 | R  | 1  | 175.1195        | 88.0637         | 59.0451         |

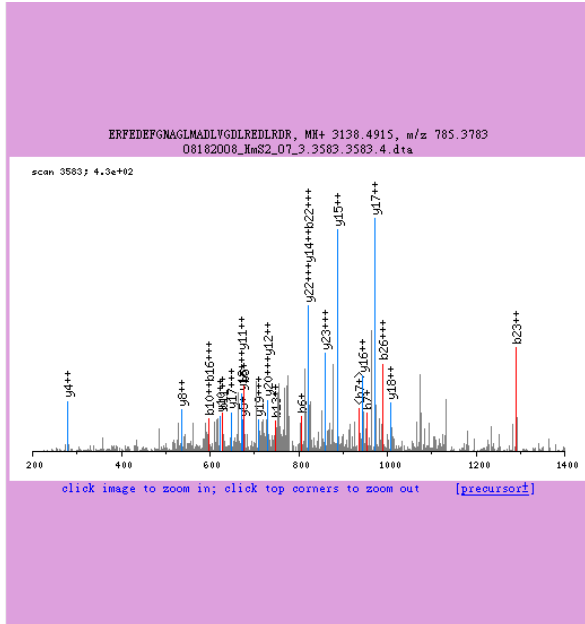

## rrnAC1709

### ERFEDEFGNAGLMADLVGDLREDLRDR

| Peptide prob. | Precursor charge | Calc neutral pep mass | Precursor neutral mass | Mass difference | Xcorr | DeltaCn |
|---------------|------------------|-----------------------|------------------------|-----------------|-------|---------|
| 0.9955        | 4                | 3137.5                | 3137.5                 | 0.0067          | 3.713 | 0.108   |

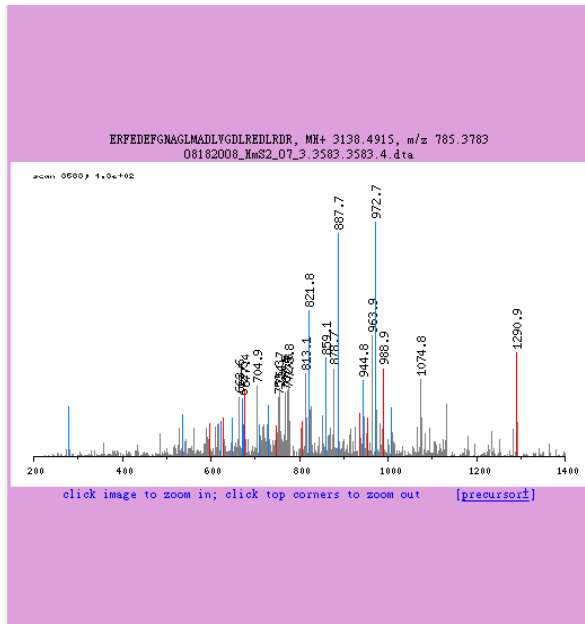

| b <sup>+</sup>  | b <sup>2+</sup>  | b <sup>3+</sup> | #  | AA | #  | y <sup>+</sup>  | y <sup>2+</sup>  | y <sup>3+</sup> |
|-----------------|------------------|-----------------|----|----|----|-----------------|------------------|-----------------|
| 130.0504        | 65.5291          | 44.0220         | 1  | E  | 27 |                 |                  |                 |
| 286.1515        | 143.5797         | 96.0557         | 2  | R  | 26 | 3009.4489       | 1505.2283        | 1003.8215       |
| 433.2199        | 217.1139         | 145.0785        | 3  | F  | 25 | 2853.3477       | 1427.1778        | 951.7878        |
| 562.2625        | 281.6352         | 188.0927        | 4  | E  | 24 | 2706.2793       | 1353.6436        | 902.7650        |
| <b>677.2895</b> | 339.1487         | 226.4350        | 5  | D  | 23 | 2577.2367       | 1289.1223        | <b>859.7508</b> |
| <b>806.3321</b> | 403.6699         | 269.4492        | 6  | E  | 22 | 2462.2098       | 1231.6088        | <b>821.4085</b> |
| <b>933.4003</b> | 477.2042         | 316.4720        | 7  | F  | 21 | 2333.1672       | 1167.0673        | 776.3943        |
| 1010.4220       | 505.7149         | 337.4792        | 8  | G  | 20 | 2186.0988       | 1093.5533        | <b>729.3715</b> |
| 1124.4649       | 562.7364         | 375.4935        | 9  | N  | 19 | 2129.0773       | 1065.0426        | <b>710.3643</b> |
| 1195.5020       | <b>598.2549</b>  | 399.1725        | 10 | A  | 18 | 2015.0344       | <b>1008.0211</b> | <b>672.3500</b> |
| 1252.5235       | <b>626.7656</b>  | 418.1797        | 11 | G  | 17 | 1943.9973       | <b>972.5026</b>  | <b>648.6710</b> |
| 1365.6075       | 683.3077         | 455.8744        | 12 | L  | 16 | 1886.9758       | <b>943.9918</b>  | 629.6638        |
| 1496.6480       | <b>748.8279</b>  | 499.5546        | 13 | M  | 15 | 1773.8918       | <b>887.4498</b>  | 591.9691        |
| 1567.6851       | 784.3465         | 523.2336        | 14 | A  | 14 | 1642.8513       | <b>821.9295</b>  | 548.2890        |
| 1682.7121       | 841.8599         | 561.5759        | 15 | D  | 13 | 1571.8142       | 786.4110         | 524.6099        |
| 1795.7961       | 898.4020         | <b>599.2706</b> | 16 | L  | 12 | 1456.7872       | <b>728.8975</b>  | 486.2676        |
| 1894.8645       | 947.9362         | 632.2934        | 17 | V  | 11 | 1343.7032       | <b>672.3555</b>  | 448.5729        |
| 1951.8860       | 976.4469         | 651.3006        | 18 | G  | 10 | 1244.6347       | <b>622.8213</b>  | 415.5501        |
| 2066.9129       | 1033.9604        | 689.6429        | 19 | D  | 9  | 1187.6133       | 594.3105         | 396.5430        |
| 2179.9970       | 1090.5024        | 727.3716        | 20 | L  | 8  | 1072.5863       | <b>536.7971</b>  | 358.2007        |
| 2336.0981       | 1168.5530        | 779.3713        | 21 | R  | 7  | 959.5023        | 480.2550         | 320.5060        |
| 2465.1407       | 1233.0743        | <b>822.3855</b> | 22 | E  | 6  | 803.4012        | 402.2045         | 268.4723        |
| 2580.1677       | <b>1290.5877</b> | 860.7278        | 23 | D  | 5  | <b>674.3586</b> | 337.6832         | 225.4581        |
| 2693.2517       | 1347.1298        | 898.4225        | 24 | L  | 4  | 559.3316        | <b>280.1697</b>  | 187.1158        |
| 2849.3528       | 1425.1803        | 950.4562        | 25 | R  | 3  | 446.2476        | 223.6277         | 149.4211        |
| 2964.3798       | 1482.6938        | <b>988.7985</b> | 26 | D  | 2  | 290.1464        | 145.5771         | 97.3874         |
|                 |                  |                 | 27 | R  | 1  | 175.1195        | 88.0637          | 59.0451         |

VTDADLLTIADDEVTDAR, MH+ 1932.9402, m/z 966.9737  
08182008\_HmS2\_07\_3\_3310.3310.2.dta

scan 3310; 7.9e+02

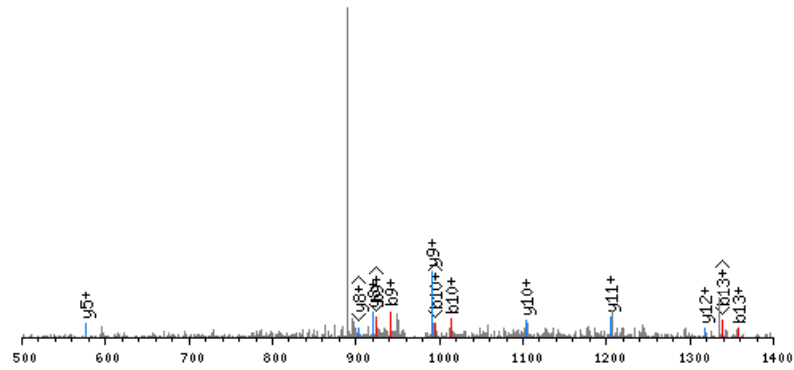

click image to zoom in; click top corners to zoom out [\[precursor\]](#)

## rrnAC1690 VTDADLLTIADDEVTDAR

| Peptide prob. | Precursor charge | Calc neutral pep mass | Precursor neutral mass | Mass difference | Xcorr | Deltaen |
|---------------|------------------|-----------------------|------------------------|-----------------|-------|---------|
| 1             | 2                | 1931.9                | 1931.9                 | 0.0059          | 2.769 | 0.358   |

VTDADLLTIADDEVTDAR, MH+ 1932.9402, m/z 966.9737  
08182008\_HmS2\_07\_3\_3310.3310.2.dta

scan 3310; 7.9e+02

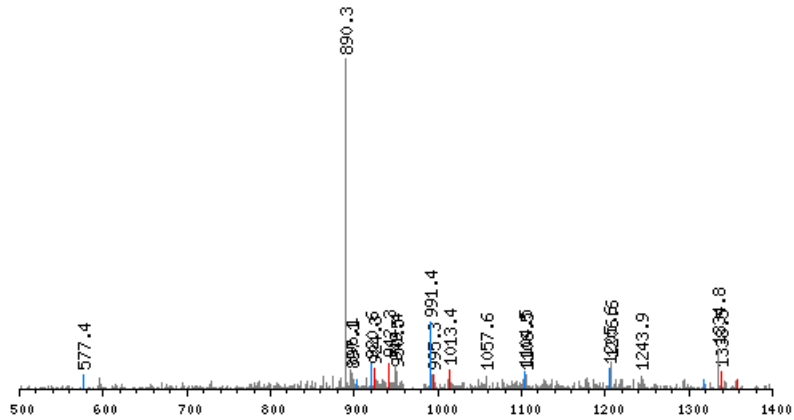

click image to zoom in; click top corners to zoom out [\[precursor\]](#)

| b <sup>+</sup> | #  | AA | #  | y <sup>+</sup> | y <sup>2+</sup> |
|----------------|----|----|----|----------------|-----------------|
| 100.0762       | 1  | V  | 18 |                |                 |
| 201.1239       | 2  | T  | 17 | 1833.8718      | 917.4398        |
| 316.1509       | 3  | D  | 16 | 1732.8241      | 866.9160        |
| 387.1880       | 4  | A  | 15 | 1617.7972      | 809.4025        |
| 502.2149       | 5  | D  | 14 | 1546.7601      | 773.8839        |
| 615.2990       | 6  | L  | 13 | 1431.7331      | 716.3705        |
| 728.3830       | 7  | L  | 12 | 1318.6490      | 659.8284        |
| 829.4307       | 8  | T  | 11 | 1205.5650      | 603.2864        |
| 942.5148       | 9  | I  | 10 | 1104.5173      | 552.7626        |
| 1013.5519      | 10 | A  | 9  | 991.4332       | 496.2205        |
| 1128.5788      | 11 | D  | 8  | 920.3961       | 460.7020        |
| 1257.6214      | 12 | E  | 7  | 805.3692       | 403.1885        |
| 1356.6899      | 13 | V  | 6  | 676.3266       | 338.6672        |
| 1457.7375      | 14 | T  | 5  | 577.2582       | 289.1330        |
| 1572.7645      | 15 | D  | 4  | 476.2105       | 238.6092        |
| 1687.7914      | 16 | D  | 3  | 361.1836       | 181.0957        |
| 1758.8285      | 17 | A  | 2  | 246.1566       | 123.5822        |
|                | 18 | R  | 1  | 175.1195       | 88.0637         |



LDAGDTEQLPVESR, MH+ 1529.7447, m/z 765.3760  
08182008\_HmS2\_07\_3.1550.1550.2.dta

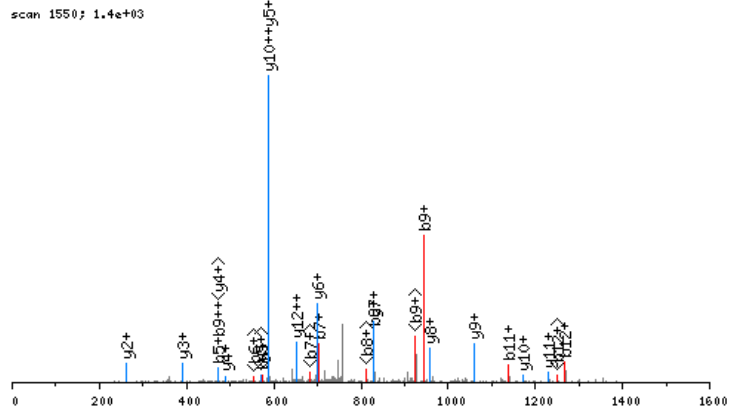

## rrnAC1479 LDAGDTEQLPVESR

| Peptide prob. | Precursor charge | Calc neutral pep mass | Precursor neutral mass | Mass difference | Xcorr | Deltacn |
|---------------|------------------|-----------------------|------------------------|-----------------|-------|---------|
| 1             | 2                | 1528.7                | 1528.7                 | 0.001           | 4.362 | 0.429   |

LDAGDTEQLPVESR, MH+ 1529.7447, m/z 765.3760  
08182008\_HmS2\_07\_3.1550.1550.2.dta

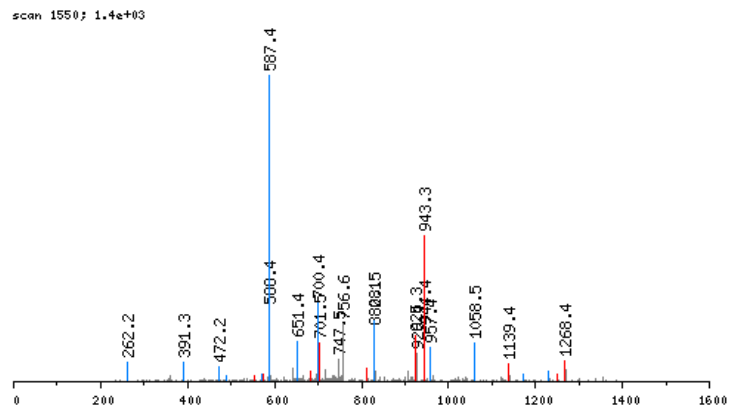

| b <sup>+</sup> | b <sup>2+</sup> | # AA | # | y <sup>+</sup> | y <sup>2+</sup> |
|----------------|-----------------|------|---|----------------|-----------------|
| 114.0919       | 57.5499         | 1    | I | 14             |                 |
| 229.1188       | 115.0633        | 2    | D | 13             | 1416.6607       |
| 300.1559       | 150.5819        | 3    | A | 12             | 1301.6337       |
| 357.1774       | 179.0926        | 4    | G | 11             | 1230.5966       |
| 472.2044       | 236.6061        | 5    | D | 10             | 1173.5752       |
| 573.2520       | 287.1299        | 6    | T | 9              | 1058.5482       |
| 702.2946       | 351.6512        | 7    | E | 8              | 957.5005        |
| 830.3532       | 415.6805        | 8    | Q | 7              | 828.4579        |
| 943.4373       | 472.2225        | 9    | L | 6              | 700.3994        |
| 1040.4900      | 520.7489        | 10   | P | 5              | 587.3153        |
| 1139.5584      | 570.2831        | 11   | V | 4              | 490.2625        |
| 1268.6010      | 634.8044        | 12   | E | 3              | 391.1941        |
| 1355.6331      | 678.3204        | 13   | S | 2              | 262.1515        |
|                |                 | 14   | R | 1              | 175.1195        |

VDDGVVLHWQF, MK+ 1314.6483, m/z 657.8278  
08182008\_NmS1\_12\_2\_3186.3186.2.dta

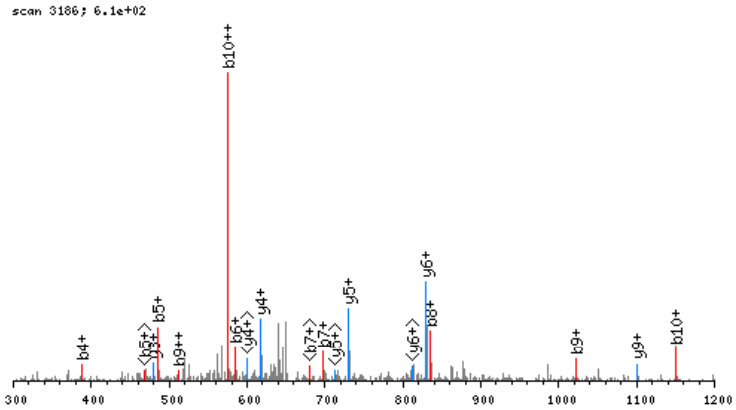

## rrnAC1131 VDDGVVLHWQF

| Peptide prob. | Precursor charge | Calc neutral pep mass | Precursor neutral mass | Mass difference | Xcorr | Deltaen |
|---------------|------------------|-----------------------|------------------------|-----------------|-------|---------|
| 1             | 2                | 1313.6                | 1313.6                 | 0.0034          | 3.478 | 0.365   |

VDDGVVLHWQF, MK+ 1314.6483, m/z 657.8278  
08182008\_NmS1\_12\_2\_3186.3186.2.dta

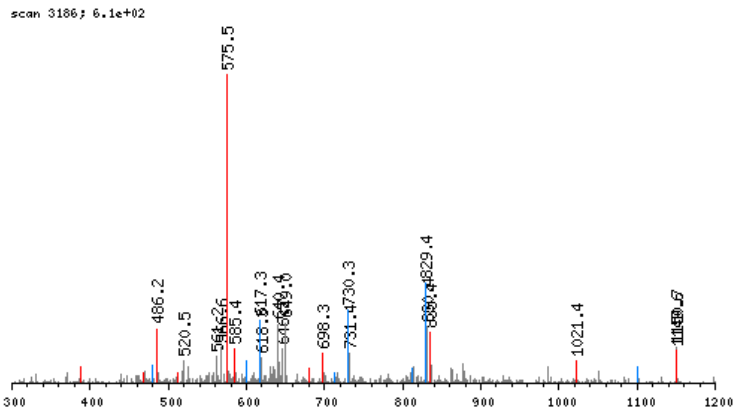

| b <sup>+</sup>   | b <sup>2+</sup> | #  | AA | #  | y <sup>+</sup>   | y <sup>2+</sup> |
|------------------|-----------------|----|----|----|------------------|-----------------|
| 100.0762         | 50.5420         | 1  | V  | 11 |                  |                 |
| 215.1032         | 108.0555        | 2  | D  | 10 | 1215.5798        | 608.2938        |
| 330.1301         | 165.5690        | 3  | D  | 9  | <b>1100.5529</b> | 550.7804        |
| <b>387.1516</b>  | 194.0797        | 4  | G  | 8  | 985.5260         | 493.2669        |
| <b>486.2200</b>  | 243.6139        | 5  | V  | 7  | 928.5045         | 464.7562        |
| <b>585.2884</b>  | 293.1481        | 6  | V  | 6  | <b>829.4361</b>  | 415.2220        |
| <b>698.3725</b>  | 349.6902        | 7  | L  | 5  | <b>730.3677</b>  | 365.6877        |
| <b>835.4314</b>  | 418.2196        | 8  | H  | 4  | <b>617.2836</b>  | 309.1457        |
| <b>1021.5107</b> | <b>511.2593</b> | 9  | W  | 3  | <b>480.2247</b>  | 240.6163        |
| <b>1149.5693</b> | <b>575.2886</b> | 10 | Q  | 2  | 294.1454         | 147.5766        |
|                  |                 | 11 | F  | 1  | 166.0868         | 83.5473         |

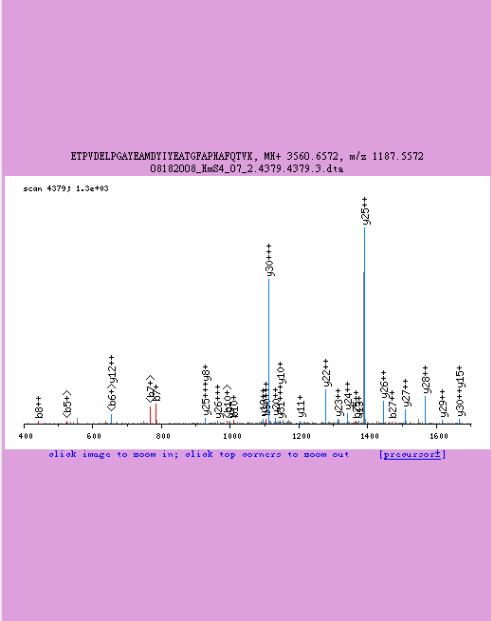

# rrnAC0917

## ETPVDELPGAYEAMDYIYEATGFAPHAFTVK

| Peptide prob. | Precursor charge | Calc neutral pep mass | Precursor neutral mass | Mass difference | Xcorr | Deltacn |
|---------------|------------------|-----------------------|------------------------|-----------------|-------|---------|
| 1             | 3                | 3559.6                | 3560.6                 | 0.9899          | 3.586 | 0.363   |

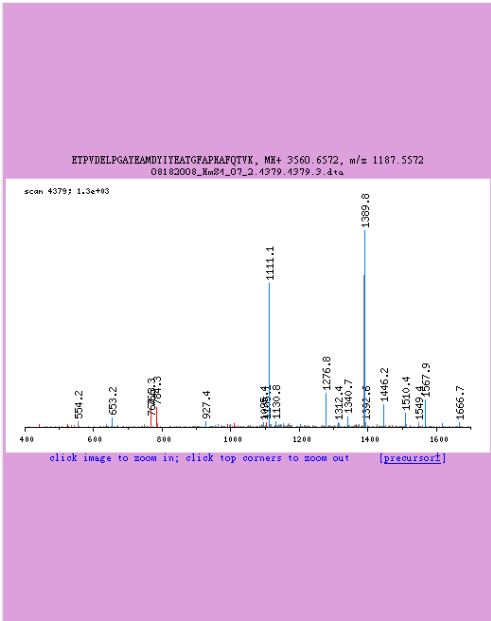

| b*               | b <sup>2+</sup>  | b <sup>3+</sup>  | # AA | # | y* | y <sup>2+</sup> | y <sup>3+</sup> |
|------------------|------------------|------------------|------|---|----|-----------------|-----------------|
| 130.0504         | 65.5291          | 44.0220          | 1    | E | 32 |                 |                 |
| 231.0981         | 116.0530         | 77.7046          | 2    | T | 31 | 3431.6146       | 1716.3112       |
| 328.1509         | 164.5793         | 110.0555         | 3    | P | 30 | 3330.5669       | 1665.7874       |
| 427.2193         | 214.1135         | 143.0783         | 4    | Y | 29 | 3233.5141       | 1617.2610       |
| 542.2462         | 271.6270         | 181.4206         | 5    | D | 28 | 3134.4457       | 1567.7268       |
| 671.2888         | 336.1483         | 224.4348         | 6    | E | 27 | 3019.4188       | 1510.2133       |
| <b>784.3729</b>  | 392.6903         | 262.1295         | 7    | L | 26 | 2890.3762       | 1445.6920       |
| 881.4256         | <b>441.2167</b>  | 294.4804         | 8    | P | 25 | 2777.2921       | 1389.1500       |
| 938.4471         | 469.7275         | 313.4876         | 9    | G | 24 | 2680.2394       | 1340.6236       |
| <b>1009.4842</b> | 505.2460         | 337.1666         | 10   | A | 23 | 2623.2179       | 1312.1129       |
| 1172.5475        | 586.7777         | 391.5211         | 11   | Y | 22 | 2552.1808       | 1276.5943       |
| 1301.5901        | 651.2990         | 434.5353         | 12   | E | 21 | 2389.1175       | 1195.0626       |
| 1372.6273        | 686.8175         | 458.2143         | 13   | A | 20 | 2260.0749       | 1130.5413       |
| 1503.6677        | 752.3378         | 501.8945         | 14   | M | 19 | 2189.0378       | 1095.0228       |
| 1618.6947        | 809.8513         | 540.2368         | 15   | D | 18 | 2057.9973       | 1029.5025       |
| 1781.7580        | 891.3829         | 594.5912         | 16   | Y | 17 | 1942.9703       | 971.9891        |
| 1894.8421        | 947.9249         | 632.2859         | 17   | I | 16 | 1779.9070       | 890.4574        |
| 2057.9054        | 1029.4566        | 686.6404         | 18   | Y | 15 | 1666.8229       | 833.9154        |
| 2186.9480        | 1093.9779        | 729.6545         | 19   | E | 14 | 1503.7596       | 752.3837        |
| 2257.9851        | 1129.4965        | 753.3336         | 20   | A | 13 | 1374.7170       | 687.8624        |
| 2359.0328        | 1180.0203        | 787.0161         | 21   | T | 12 | 1303.6799       | 652.3439        |
| 2416.0542        | 1208.5310        | 806.0233         | 22   | G | 11 | 1202.6322       | 601.8200        |
| 2563.1227        | 1282.0652        | 855.0461         | 23   | F | 10 | 1145.6108       | 573.3093        |
| 2634.1598        | 1317.5838        | 878.7251         | 24   | A | 9  | 998.5423        | 499.7751        |
| 2731.2125        | <b>1366.1102</b> | 911.0761         | 25   | P | 8  | 927.5052        | 464.2565        |
| 2868.2715        | 1434.6396        | 956.7624         | 26   | H | 7  | 830.4525        | 415.7901        |
| 2939.3086        | <b>1470.1582</b> | 980.4414         | 27   | A | 6  | 693.3936        | 347.2007        |
| 3086.3770        | 1543.6924        | 1029.4642        | 28   | F | 5  | 622.3564        | 311.6821        |
| 3214.4356        | 1607.7217        | 1072.1504        | 29   | Q | 4  | 475.2880        | 238.1479        |
| 3315.4832        | 1658.2455        | <b>1105.8330</b> | 30   | T | 3  | 347.2294        | 174.1186        |
| 3414.5517        | 1707.7797        | 1138.8558        | 31   | Y | 2  | 246.1818        | 123.5948        |
|                  |                  |                  | 32   | K | 1  | 147.1134        | 74.0606         |

TVLTQTGGDALNPTLER, MH+ 1785.9347, m/z 893.4710  
20081001M4\_685\_968.01566.01566.2.dta

scan 1566: 1.6e+03

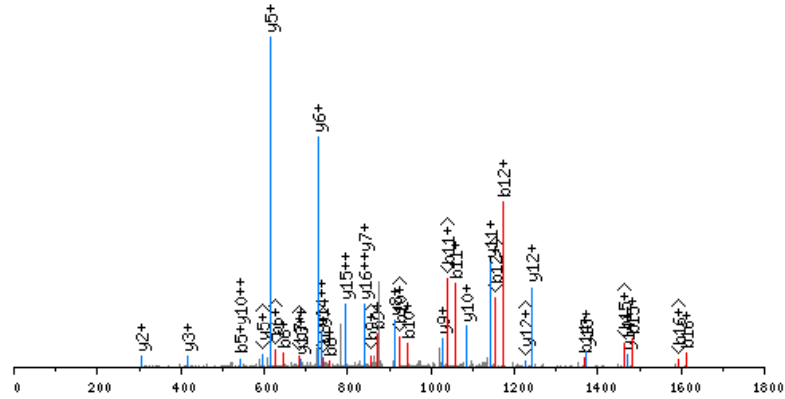

click image to zoom in; click top corners to zoom out [\[precursor!\]](#)

## rrnAC0845 TVLTQTGGDALNPTLER

| Peptide prob. | Precursor charge | Calc neutral pep mass | Precursor neutral mass | Mass difference | Xcorr | Deltaen |
|---------------|------------------|-----------------------|------------------------|-----------------|-------|---------|
| 1             | 2                | 1784.9                | 1784.9                 | 0.000152        | 4.429 | 0.512   |

TVLTQTGGDALNPTLER, MH+ 1785.9347, m/z 893.4710  
20081001M4\_685\_968.01566.01566.2.dta

scan 1566: 1.6e+03

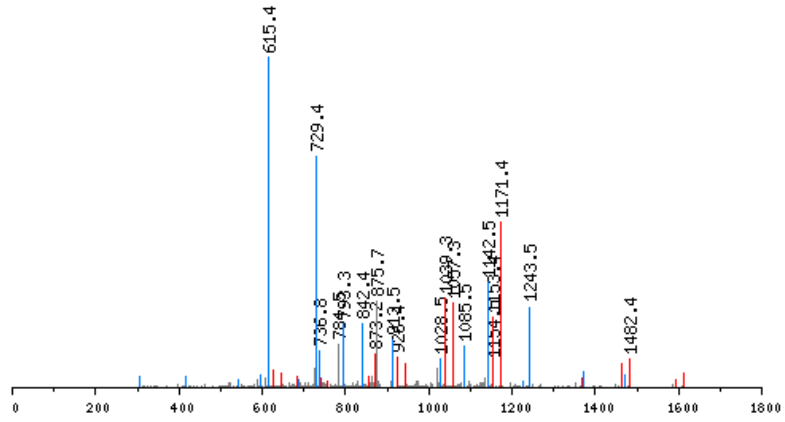

click image to zoom in; click top corners to zoom out [\[precursor!\]](#)

| b <sup>+</sup> | #  | AA | #  | y <sup>+</sup> | y <sup>2+</sup> |
|----------------|----|----|----|----------------|-----------------|
| 102.0555       | 1  | T  | 17 |                |                 |
| 201.1239       | 2  | V  | 16 | 1684.8870      | 842.9474        |
| 314.2080       | 3  | L  | 15 | 1585.8186      | 793.4132        |
| 415.2557       | 4  | T  | 14 | 1472.7345      | 736.8712        |
| 543.3142       | 5  | Q  | 13 | 1371.6868      | 686.3473        |
| 644.3619       | 6  | T  | 12 | 1243.6283      | 622.3180        |
| 701.3834       | 7  | G  | 11 | 1142.5806      | 571.7942        |
| 758.4048       | 8  | G  | 10 | 1085.5591      | 543.2835        |
| 873.4318       | 9  | D  | 9  | 1028.5376      | 514.7727        |
| 944.4689       | 10 | A  | 8  | 913.5107       | 457.2593        |
| 1057.5530      | 11 | L  | 7  | 842.4736       | 421.7407        |
| 1171.5959      | 12 | N  | 6  | 729.3895       | 365.1987        |
| 1268.6487      | 13 | P  | 5  | 615.3466       | 308.1772        |
| 1369.6963      | 14 | T  | 4  | 518.2938       | 259.6508        |
| 1482.7804      | 15 | L  | 3  | 417.2462       | 209.1270        |
| 1611.8230      | 16 | E  | 2  | 304.1621       | 152.5850        |
|                | 17 | R  | 1  | 175.1195       | 88.0637         |

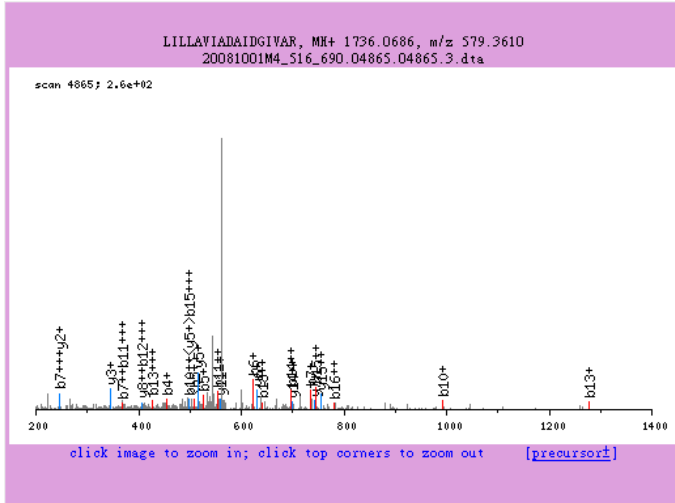

# rrnAC0788

## LILLAVIADAIDGIVAR

| Peptide prob. | Precursor charge | Calc neutral pep mass | Precursor neutral mass | Mass difference | Xcorr | Deltacn |
|---------------|------------------|-----------------------|------------------------|-----------------|-------|---------|
| 0.9985        | 3                | 1735.1                | 1735.1                 | -0.0004         | 2.871 | 0.143   |

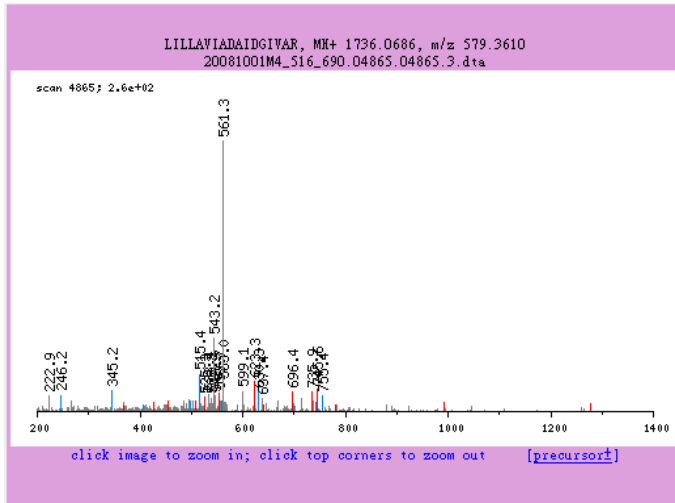

| b <sup>+</sup>   | b <sup>2+</sup> | b <sup>3+</sup> | #  | AA | #  | y <sup>+</sup>  | y <sup>2+</sup> | y <sup>3+</sup> |
|------------------|-----------------|-----------------|----|----|----|-----------------|-----------------|-----------------|
| 114.0919         | 57.5499         | 38.7025         | 1  | L  | 17 |                 |                 |                 |
| 227.1760         | 114.0919        | 76.3972         | 2  | I  | 16 | 1622.9845       | 811.9962        | 541.6667        |
| 340.2600         | 170.6339        | 114.0919        | 3  | L  | 15 | 1509.9005       | <b>755.4541</b> | 503.9720        |
| <b>453.3441</b>  | 227.1760        | 151.7866        | 4  | L  | 14 | 1396.8164       | <b>698.9121</b> | 466.2773        |
| <b>524.3812</b>  | 262.6945        | 175.4656        | 5  | A  | 13 | 1283.7323       | 642.3701        | 428.5827        |
| <b>623.4496</b>  | 312.2287        | 208.4884        | 6  | V  | 12 | 1212.6952       | 606.8515        | 404.9036        |
| <b>736.5337</b>  | <b>368.7707</b> | <b>246.1831</b> | 7  | I  | 11 | 1113.6268       | <b>557.3173</b> | 371.8808        |
| 807.5708         | 404.2893        | 269.8621        | 8  | A  | 10 | 1000.5427       | 500.7753        | 334.1861        |
| 922.5977         | 461.8028        | 308.2045        | 9  | D  | 9  | 929.5056        | 465.2567        | 310.5071        |
| <b>993.6348</b>  | <b>497.3213</b> | 331.8835        | 10 | A  | 8  | 814.4787        | <b>407.7433</b> | 272.1648        |
| 1106.7189        | <b>553.8634</b> | <b>369.5782</b> | 11 | I  | 7  | <b>743.4416</b> | 372.2247        | 248.4857        |
| 1221.7459        | 611.3768        | <b>407.9205</b> | 12 | D  | 6  | <b>630.3575</b> | 315.6827        | 210.7910        |
| <b>1278.7673</b> | <b>639.8876</b> | <b>426.9277</b> | 13 | G  | 5  | <b>515.3306</b> | 258.1692        | 172.4487        |
| 1391.8514        | <b>696.4296</b> | 464.6223        | 14 | I  | 4  | 458.3091        | 229.6585        | 153.4416        |
| 1490.9198        | <b>745.9638</b> | <b>497.6451</b> | 15 | V  | 3  | <b>345.2250</b> | 173.1164        | 115.7469        |
| 1561.9569        | <b>781.4824</b> | 521.3242        | 16 | A  | 2  | <b>246.1566</b> | 123.5822        | 82.7241         |
|                  |                 |                 | 17 | R  | 1  | 175.1195        | 88.0637         | 59.0451         |

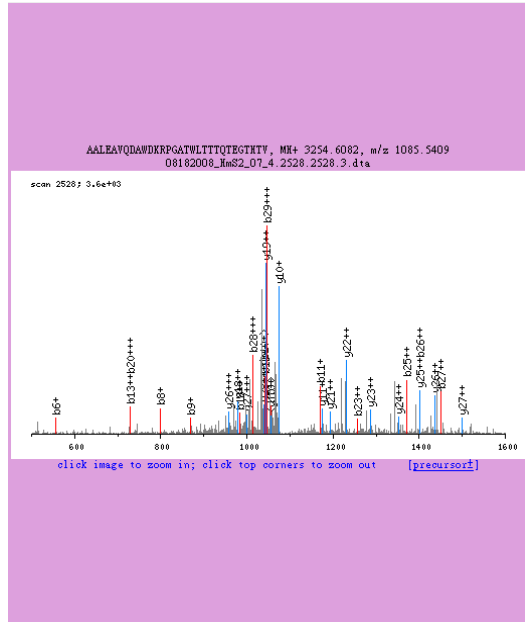

## rrnAC0753

AALEAVQDAWDKRPGATWLTTTQTEGTHTV

| Peptide prob. | Precursor charge | Calc neutral pep mass | Precursor neutral mass | Mass difference | Xcorr | Deltacn |
|---------------|------------------|-----------------------|------------------------|-----------------|-------|---------|
| 1             | 3                | 3253.6                | 3254.6                 | 1.0179          | 5.036 | 0.349   |

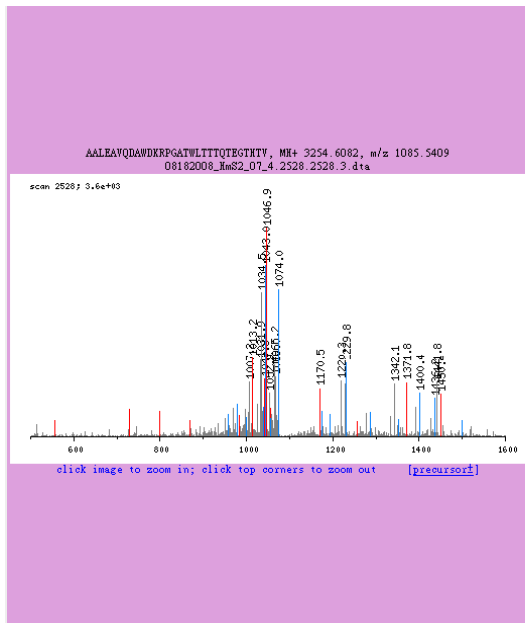

| b <sup>+</sup>   | b <sup>2+</sup>  | b <sup>3+</sup>  | #  | AA | #  | y <sup>+</sup>   | y <sup>2+</sup>  | y <sup>3+</sup>  |
|------------------|------------------|------------------|----|----|----|------------------|------------------|------------------|
| 72.0449          | 96.5264          | 24.6869          | 1  | A  | 30 |                  |                  |                  |
| 143.0821         | 72.0449          | 48.3659          | 2  | A  | 29 | 3183.5711        | 1592.2895        | 1061.8622        |
| 256.1661         | 128.5870         | 86.0606          | 3  | L  | 28 | 3112.5340        | 1556.7709        | <b>1038.1832</b> |
| 385.2087         | 193.1083         | 129.0748         | 4  | E  | 27 | 2999.4499        | <b>1500.2289</b> | <b>1000.4885</b> |
| 456.2458         | 228.6268         | 152.7538         | 5  | A  | 26 | 2870.4073        | <b>1435.7076</b> | <b>957.4743</b>  |
| <b>555.3142</b>  | 278.1610         | 185.7766         | 6  | V  | 25 | 2799.3702        | <b>1400.1890</b> | 939.1953         |
| 683.3728         | 342.1903         | 228.4628         | 7  | Q  | 24 | 2700.3018        | <b>1350.6548</b> | 900.7725         |
| <b>798.3998</b>  | 399.7038         | 266.8031         | 8  | D  | 23 | 2572.2432        | <b>1286.6255</b> | 858.0863         |
| <b>869.4369</b>  | 435.2223         | 290.4842         | 9  | A  | 22 | 2457.2163        | <b>1229.1120</b> | 819.7440         |
| <b>1055.5162</b> | 528.2620         | 352.5106         | 10 | W  | 21 | 2386.1791        | <b>1193.5935</b> | 796.0649         |
| <b>1170.5431</b> | 585.7755         | 390.8529         | 11 | D  | 20 | 2200.0998        | 1100.5538        | 734.0385         |
| 1298.6381        | 649.8230         | 433.5512         | 12 | K  | 19 | 2085.0729        | <b>1043.0404</b> | 695.6962         |
| 1454.7392        | <b>727.8735</b>  | 485.5850         | 13 | R  | 18 | 1956.9779        | <b>978.9929</b>  | 652.9979         |
| 1551.7920        | 776.3999         | 517.9359         | 14 | P  | 17 | 1800.8768        | 900.9423         | 600.9642         |
| 1608.8134        | 804.9106         | 536.9430         | 15 | G  | 16 | 1703.8241        | 852.4159         | 568.6132         |
| 1679.8505        | 840.4292         | 560.6221         | 16 | A  | 15 | 1646.8026        | 823.9052         | 549.6061         |
| 1780.8982        | 890.9530         | 594.3046         | 17 | T  | 14 | 1575.7655        | 788.3867         | 525.9270         |
| 1966.9775        | <b>983.9927</b>  | 656.3311         | 18 | W  | 13 | 1474.7178        | 737.8628         | 492.2445         |
| 2080.0616        | <b>1040.5347</b> | 694.0257         | 19 | L  | 12 | 1288.6385        | 644.8232         | 430.2180         |
| 2181.1093        | 1091.0586        | <b>727.7083</b>  | 20 | T  | 11 | <b>1175.5544</b> | 588.2811         | 392.5234         |
| 2282.1570        | 1141.5824        | 761.3909         | 21 | T  | 10 | <b>1074.5067</b> | 537.7573         | 358.8408         |
| 2383.2046        | 1192.1062        | 795.0734         | 22 | T  | 9  | 973.4591         | 487.2334         | 325.1582         |
| 2511.2632        | <b>1256.1355</b> | 837.7596         | 23 | Q  | 8  | 872.4114         | 436.7096         | 291.4757         |
| 2612.3109        | 1306.6594        | 871.4422         | 24 | T  | 7  | 744.3528         | 372.6803         | 248.7895         |
| 2741.3535        | <b>1371.1807</b> | 914.4564         | 25 | E  | 6  | 643.3051         | 322.1565         | 215.1069         |
| 2798.3749        | <b>1399.6914</b> | 933.4635         | 26 | G  | 5  | 514.2625         | 257.6352         | 172.0927         |
| 2899.4226        | <b>1450.2152</b> | 967.1461         | 27 | T  | 4  | 457.2411         | 229.1244         | 153.0856         |
| 3036.4815        | 1518.7447        | <b>1012.8324</b> | 28 | I  | 3  | 356.1934         | 178.6006         | 119.4030         |
| 3137.5292        | 1569.2685        | <b>1046.5150</b> | 29 | T  | 2  | 219.1345         | 110.0712         | 73.7167          |
|                  |                  |                  | 30 | V  | 1  | 118.0868         | 59.5473          | 40.0342          |

GPAGIAVTEAVLDAIR, MH+ 1552.8699, m/z 776.9386  
08182008\_MmS3\_12\_full11.3715.3715.2.dta

scan 3715; 2.4e+02

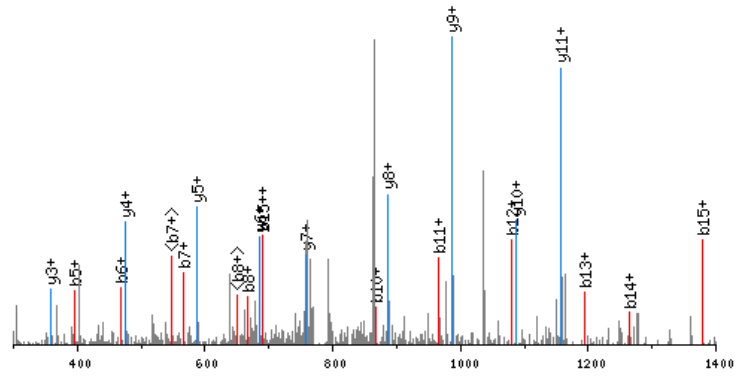

click image to zoom in; click top corners to zoom out [\[precursor!\]](#)

## rrnAC0547 GPAGIAVTEAVLDAIR

| Peptide prob. | Precursor charge | Calc neutral pep mass | Precursor neutral mass | Mass difference | Xcorr | DeltaC |
|---------------|------------------|-----------------------|------------------------|-----------------|-------|--------|
| 1             | 2                | 1551.9                | 1551.8                 | -0.0285         | 4.075 | 0.258  |

GPAGIAVTEAVLDAIR, MH+ 1552.8699, m/z 776.9386  
08182008\_MmS3\_12\_full11.3715.3715.2.dta

scan 3715; 2.4e+02

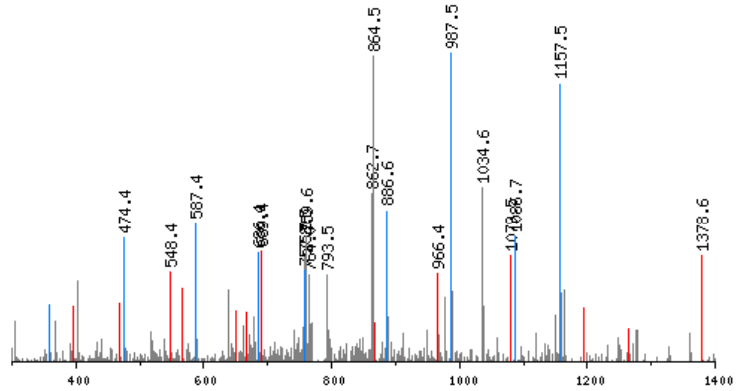

click image to zoom in; click top corners to zoom out [\[precursor!\]](#)

| b <sup>+</sup> | b <sup>2+</sup> | #  | AA | #  | y <sup>+</sup> | y <sup>2+</sup> |
|----------------|-----------------|----|----|----|----------------|-----------------|
| 58.0293        | 29.5186         | 1  | G  | 16 |                |                 |
| 155.0821       | 78.0449         | 2  | P  | 15 | 1495.8484      | 748.4281        |
| 226.1192       | 113.5635        | 3  | A  | 14 | 1398.7957      | 699.9017        |
| 283.1406       | 142.0742        | 4  | G  | 13 | 1327.7585      | 664.3832        |
| 396.2247       | 198.6163        | 5  | I  | 12 | 1270.7371      | 635.8725        |
| 467.2618       | 234.1348        | 6  | A  | 11 | 1157.6530      | 579.3304        |
| 566.3302       | 283.6690        | 7  | V  | 10 | 1086.6159      | 543.8119        |
| 667.3779       | 334.1929        | 8  | T  | 9  | 987.5475       | 494.2777        |
| 796.4205       | 398.7142        | 9  | E  | 8  | 886.4998       | 443.7538        |
| 867.4576       | 434.2327        | 10 | A  | 7  | 757.4572       | 379.2325        |
| 966.5260       | 483.7669        | 11 | V  | 6  | 686.4201       | 343.7140        |
| 1079.6101      | 540.3090        | 12 | L  | 5  | 587.3517       | 294.1798        |
| 1194.6370      | 597.8224        | 13 | D  | 4  | 474.2676       | 237.6377        |
| 1265.6741      | 633.3410        | 14 | A  | 3  | 359.2407       | 180.1243        |
| 1378.7582      | 689.8830        | 15 | I  | 2  | 288.2036       | 144.6057        |
|                |                 | 16 | R  | 1  | 175.1195       | 88.0637         |

MEDLLDAAR, MH+ 1033.4988, m/z 517.2530  
08182008\_HmS3\_12\_1.2251.2251.2.dta

scan 2251; 8.3e+02

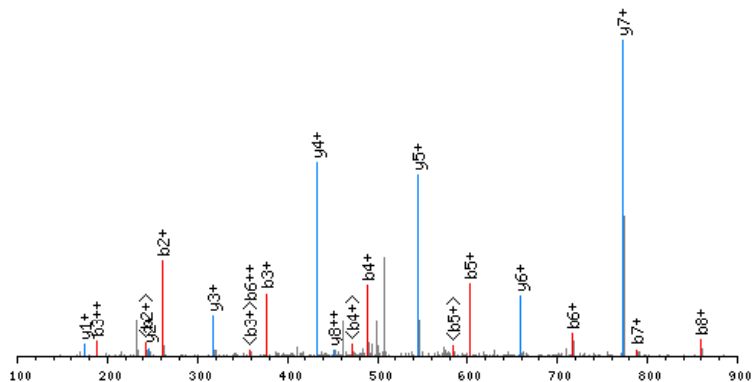

click image to zoom in; click top corners to zoom out [\[precursor!\]](#)

## rrnAC0446 MEDLLDAAR

| Peptide prob. | Precursor charge | Calc neutral pep mass | Precursor neutral mass | Mass difference | Xcorr | Deltacn |
|---------------|------------------|-----------------------|------------------------|-----------------|-------|---------|
| 0.9996        | 2                | 1032.5                | 1032.5                 | 0.0004          | 3.1   | 0.294   |

MEDLLDAAR, MH+ 1033.4988, m/z 517.2530  
08182008\_HmS3\_12\_1.2251.2251.2.dta

scan 2251; 8.3e+02

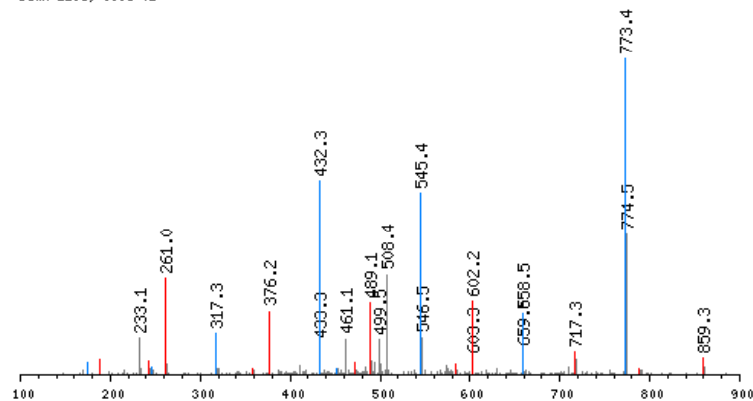

click image to zoom in; click top corners to zoom out [\[precursor!\]](#)

| b <sup>+</sup>  | b <sup>2+</sup> | # | AA | # | y <sup>+</sup>  | y <sup>2+</sup> |
|-----------------|-----------------|---|----|---|-----------------|-----------------|
| 132.0483        | 66.5281         | 1 | M  | 9 |                 |                 |
| <b>261.0909</b> | 131.0494        | 2 | E  | 8 | 902.4583        | <b>451.7331</b> |
| <b>376.1178</b> | <b>188.5628</b> | 3 | D  | 7 | <b>773.4157</b> | 387.2118        |
| <b>489.2019</b> | 245.1049        | 4 | I  | 6 | <b>658.3888</b> | 329.6983        |
| <b>602.2860</b> | 301.6469        | 5 | L  | 5 | <b>545.3047</b> | 273.1563        |
| <b>717.3129</b> | <b>359.1604</b> | 6 | D  | 4 | <b>432.2207</b> | 216.6142        |
| <b>788.3500</b> | 394.6789        | 7 | A  | 3 | <b>317.1937</b> | 159.1008        |
| <b>859.3871</b> | 430.1975        | 8 | A  | 2 | <b>246.1566</b> | 123.5822        |
|                 |                 | 9 | R  | 1 | <b>175.1195</b> | 88.0637         |



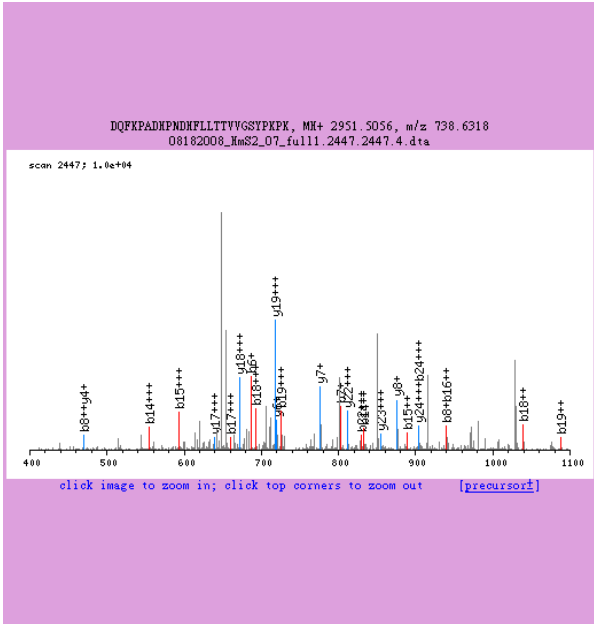

## rrnAC0254

### DQFKPADHPNDHLLTTVVGSPYKPK

| Peptide prob. | Precursor charge | Calc neutral pep mass | Precursor neutral mass | Mass difference | Xcorr | Deltacn |
|---------------|------------------|-----------------------|------------------------|-----------------|-------|---------|
| 0.9999        | 4                | 2950.5                | 2951.5                 | 0.9933          | 3.425 | 0.314   |

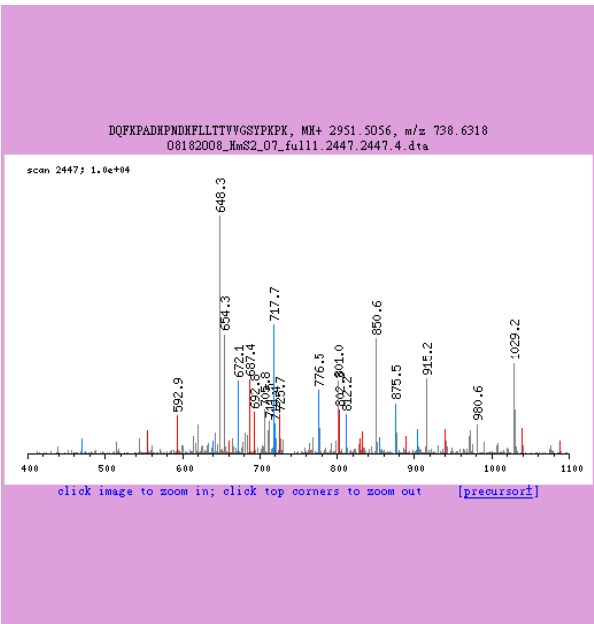

| b <sup>+</sup>  | b <sup>2+</sup>  | b <sup>3+</sup> | #  | AA | #  | y <sup>+</sup>  | y <sup>2+</sup> | y <sup>3+</sup> |
|-----------------|------------------|-----------------|----|----|----|-----------------|-----------------|-----------------|
| 116.0348        | 58.5213          | 39.3501         | 1  | D  | 26 |                 |                 |                 |
| 244.0933        | 122.5506         | 82.0363         | 2  | Q  | 25 | 2836.4786       | 1418.7432       | 946.1648        |
| 391.1618        | 196.0848         | 131.0591        | 3  | F  | 24 | 2708.4200       | 1354.7139       | <b>903.4786</b> |
| 519.2567        | 260.1323         | 173.7575        | 4  | X  | 23 | 2561.3516       | 1281.1797       | <b>854.4558</b> |
| 616.3095        | 308.6587         | 206.1084        | 5  | P  | 22 | 2433.2567       | 1217.1322       | <b>811.7574</b> |
| <b>687.3466</b> | 344.1772         | 229.7874        | 6  | A  | 21 | 2336.2039       | 1168.6059       | 779.4065        |
| <b>802.3735</b> | 401.6907         | 268.1297        | 7  | D  | 20 | 2265.1668       | 1133.0873       | 755.7275        |
| <b>939.4325</b> | <b>470.2201</b>  | 313.8160        | 8  | H  | 19 | 2150.1398       | 1075.5738       | <b>717.3852</b> |
| 1036.4852       | 518.7465         | 346.1670        | 9  | P  | 18 | 2013.0809       | 1007.0444       | <b>671.6989</b> |
| 1150.5281       | 575.7680         | 384.1813        | 10 | M  | 17 | 1916.0282       | 958.5180        | <b>639.3479</b> |
| 1265.5551       | 633.2815         | 422.5236        | 11 | D  | 16 | 1801.9852       | 901.4965        | 601.3336        |
| 1402.6140       | 701.8109         | 468.2099        | 12 | H  | 15 | 1686.9583       | 843.9831        | 562.9913        |
| 1549.6824       | 775.3451         | 517.2327        | 13 | F  | 14 | 1549.8994       | 775.4536        | 517.3050        |
| 1662.7665       | <b>831.8872</b>  | <b>554.9274</b> | 14 | I  | 13 | 1402.8310       | 701.9194        | 468.2822        |
| 1775.8505       | <b>888.4292</b>  | <b>592.6221</b> | 15 | L  | 12 | 1289.7469       | 645.2774        | 430.5875        |
| 1876.8982       | <b>938.9530</b>  | 626.3046        | 16 | T  | 11 | 1176.6628       | 588.8353        | 392.8928        |
| 1977.9459       | 989.4769         | <b>659.9872</b> | 17 | T  | 10 | 1075.6152       | 538.3115        | 359.2103        |
| 2077.0143       | <b>1039.0111</b> | <b>693.0100</b> | 18 | V  | 9  | 974.5675        | 487.7877        | 325.5277        |
| 2176.0827       | <b>1088.5453</b> | <b>726.0328</b> | 19 | V  | 8  | <b>875.4991</b> | 438.2535        | 292.5049        |
| 2233.1042       | 1117.0560        | 745.0399        | 20 | G  | 7  | <b>776.4307</b> | 388.7192        | 259.4821        |
| 2320.1362       | 1160.5720        | 774.0506        | 21 | S  | 6  | <b>719.4092</b> | 360.2085        | 240.4750        |
| 2483.1995       | 1242.1037        | <b>828.4051</b> | 22 | Y  | 5  | 632.3772        | 316.6925        | 211.4643        |
| 2580.2523       | 1290.6301        | 860.7560        | 23 | P  | 4  | <b>469.3138</b> | 235.1608        | 157.1098        |
| 2708.3473       | 1354.6776        | <b>903.4543</b> | 24 | X  | 3  | 372.2611        | 186.6345        | 124.7589        |
| 2805.4000       | 1403.2039        | 935.8052        | 25 | P  | 2  | 244.1661        | 122.5870        | 82.0606         |
|                 |                  |                 | 26 | X  | 1  | 147.1134        | 74.0606         | 49.7097         |

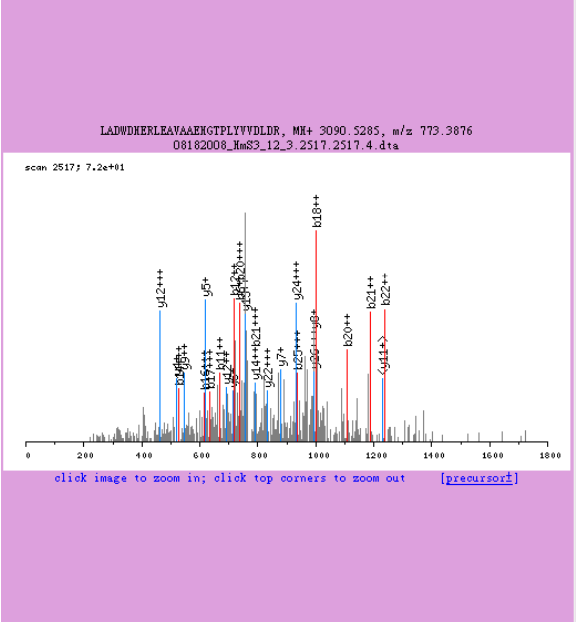

## rrnAC0198

### LADWDHERLEAVAAEHGTPLYVVDLDR

| Peptide prob. | Precursor charge | Calc neutral pep mass | Precursor neutral mass | Mass difference | Xcorr | Deltacn |
|---------------|------------------|-----------------------|------------------------|-----------------|-------|---------|
| 1             | 4                | 3089.5                | 3091.5                 | 2.0104          | 3.64  | 0.228   |

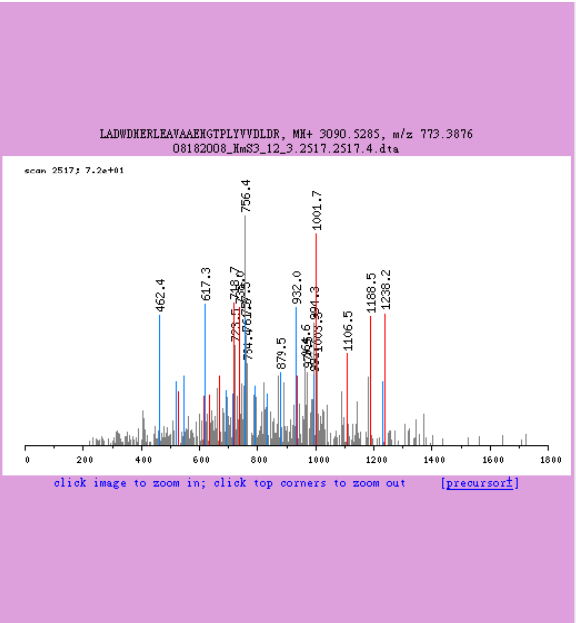

| b <sup>+</sup>  | b <sup>2+</sup>  | b <sup>3+</sup> | #  | AA | #  | y <sup>+</sup>  | y <sup>2+</sup> | y <sup>3+</sup> |
|-----------------|------------------|-----------------|----|----|----|-----------------|-----------------|-----------------|
| 114.0919        | 57.5499          | 38.7025         | 1  | L  | 27 |                 |                 |                 |
| 185.1290        | 93.0684          | 62.3816         | 2  | A  | 26 | 2977.4444       | 1489.2261       | <b>993.1534</b> |
| 300.1559        | 150.5819         | 100.7239        | 3  | D  | 25 | 2906.4073       | 1453.7076       | 969.4743        |
| 486.2353        | 243.6215         | 162.7503        | 4  | W  | 24 | 2791.3804       | 1396.1941       | <b>931.1320</b> |
| 601.2622        | 301.1350         | 201.0926        | 5  | D  | 23 | 2605.3011       | 1303.1544       | 869.1056        |
| <b>738.3211</b> | 369.6645         | 246.7789        | 6  | I  | 22 | 2490.2741       | 1245.6410       | <b>830.7633</b> |
| 867.3637        | 434.1858         | 289.7931        | 7  | E  | 21 | 2353.2152       | 1177.1115       | 785.0769        |
| 1023.4648       | 512.2363         | 341.8268        | 8  | R  | 20 | 2224.1726       | 1112.5902       | 742.0628        |
| 1136.5489       | 568.7784         | 379.5215        | 9  | L  | 19 | 2068.0715       | 1034.5397       | 690.0290        |
| 1265.5915       | 633.2997         | 422.5357        | 10 | E  | 18 | 1954.9874       | 977.9976        | 652.3344        |
| 1336.6286       | <b>668.8182</b>  | 446.2147        | 11 | A  | 17 | 1825.9448       | 913.4763        | 609.3202        |
| 1435.6970       | <b>718.3524</b>  | 479.2376        | 12 | V  | 16 | 1754.9077       | 877.9578        | 585.6411        |
| 1506.7341       | 753.8710         | 502.9166        | 13 | A  | 15 | 1655.8393       | 828.4236        | 552.6183        |
| 1577.7712       | 789.3895         | <b>526.5956</b> | 14 | A  | 14 | 1584.8022       | <b>792.9050</b> | 528.3393        |
| 1706.8138       | 853.9108         | 569.6098        | 15 | E  | 13 | 1513.7651       | <b>757.3865</b> | 505.2602        |
| 1843.8727       | 922.4403         | <b>615.2961</b> | 16 | I  | 12 | 1384.7225       | <b>692.8652</b> | <b>462.2460</b> |
| 1900.8942       | 950.9510         | <b>634.3033</b> | 17 | G  | 11 | 1247.6636       | 624.3357        | 416.5597        |
| 2001.9419       | <b>1001.4749</b> | 667.9858        | 18 | T  | 10 | 1190.6421       | 595.8250        | 397.5526        |
| 2098.9946       | 1050.0012        | 700.3368        | 19 | P  | 9  | 1089.5944       | <b>545.3011</b> | 363.8700        |
| 2212.0787       | <b>1106.5433</b> | <b>738.0315</b> | 20 | L  | 8  | <b>992.5417</b> | 496.7747        | 331.5191        |
| 2375.1420       | <b>1188.0749</b> | <b>792.3859</b> | 21 | Y  | 7  | <b>879.4576</b> | 440.2327        | 293.8244        |
| 2474.2104       | <b>1237.6091</b> | 825.4087        | 22 | V  | 6  | <b>716.3943</b> | 358.7011        | 239.4700        |
| 2573.2789       | 1287.1433        | 858.4315        | 23 | V  | 5  | <b>617.3259</b> | 309.1668        | 206.4472        |
| 2688.3058       | 1344.6568        | 896.7738        | 24 | D  | 4  | <b>518.2575</b> | 259.6326        | 173.4244        |
| 2801.3899       | 1401.1988        | <b>934.4685</b> | 25 | L  | 3  | 403.2305        | 202.1192        | 135.0821        |
| 2916.4168       | 1458.7123        | 972.8108        | 26 | D  | 2  | 290.1464        | 145.5771        | 97.3874         |
|                 |                  |                 | 27 | R  | 1  | 175.1195        | 88.0637         | 59.0451         |

# rrnAC0175

## DALAAIGAPTTADELGIDDETVEALTTAHQIR

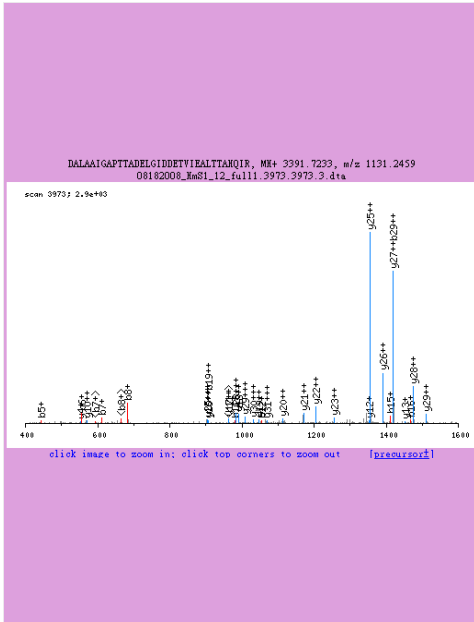

| Peptide prob. | Precursor charge | Calc neutral pep mass | Precursor neutral mass | Mass difference | Xcorr | Deltaen |
|---------------|------------------|-----------------------|------------------------|-----------------|-------|---------|
| 1             | 3                | 3390.7                | 3392.7                 | 2.0229          | 3.441 | 0.341   |

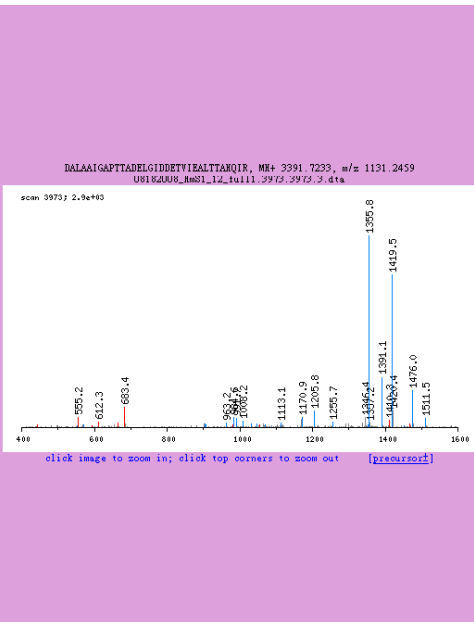

| b <sup>+</sup>   | b <sup>2+</sup>  | #  | AA | #  | y <sup>+</sup>   | y <sup>2+</sup>  | y <sup>3+</sup>  |
|------------------|------------------|----|----|----|------------------|------------------|------------------|
| 116.0948         | 58.5213          | 1  | D  | 33 |                  |                  |                  |
| 187.0719         | 94.0399          | 2  | A  | 32 | 3276.6963        | 1638.8521        | 1092.9040        |
| 300.1559         | 150.5819         | 3  | L  | 31 | 3205.6592        | 1603.3295        | <b>1069.2250</b> |
| 371.1931         | 186.1004         | 4  | A  | 30 | 3092.5752        | 1546.7915        | <b>1031.5303</b> |
| <b>442.2302</b>  | 221.6190         | 5  | A  | 29 | 3021.5380        | <b>1511.2729</b> | <b>1007.8512</b> |
| <b>555.3142</b>  | 278.1610         | 6  | I  | 28 | 2950.5009        | <b>1475.7544</b> | <b>984.1722</b>  |
| <b>612.3357</b>  | 306.6718         | 7  | G  | 27 | 2837.4169        | <b>1419.2129</b> | 946.4775         |
| <b>683.3728</b>  | 342.1903         | 8  | A  | 26 | 2780.3954        | <b>1390.7016</b> | 927.4704         |
| 780.4256         | 390.7167         | 9  | P  | 25 | 2709.3583        | <b>1355.1831</b> | <b>903.7913</b>  |
| 881.4733         | 441.2405         | 10 | T  | 24 | 2612.3055        | 1306.6567        | 871.4404         |
| <b>982.5209</b>  | 491.7644         | 11 | T  | 23 | 2511.2579        | <b>1256.1328</b> | 837.7578         |
| <b>1053.5580</b> | 527.2829         | 12 | A  | 22 | 2410.2102        | <b>1205.6090</b> | 804.0753         |
| 1168.5850        | 584.7964         | 13 | D  | 21 | 2339.1731        | <b>1170.0904</b> | 780.3962         |
| 1297.6276        | 649.3177         | 14 | E  | 20 | 2224.1461        | <b>1112.5770</b> | 742.0539         |
| <b>1410.7116</b> | 705.8597         | 15 | L  | 19 | 2095.1035        | <b>1048.0557</b> | 699.0397         |
| <b>1467.7331</b> | 734.3705         | 16 | G  | 18 | 1982.0195        | <b>991.5136</b>  | 661.3450         |
| 1580.8172        | 790.9125         | 17 | I  | 17 | 1924.9980        | <b>963.0029</b>  | 642.3379         |
| 1695.8441        | 848.4260         | 18 | D  | 16 | 1811.9139        | <b>906.4609</b>  | 604.6432         |
| 1810.8711        | <b>905.9394</b>  | 19 | D  | 15 | 1696.8870        | 848.9474         | 566.3009         |
| 1939.9137        | 970.4607         | 20 | E  | 14 | 1581.8600        | 791.4339         | 527.9586         |
| 2040.9613        | 1020.9846        | 21 | T  | 13 | <b>1452.8175</b> | 726.9126         | 484.9444         |
| 2140.0297        | 1070.5188        | 22 | V  | 12 | <b>1351.7698</b> | 676.3888         | 451.2618         |
| 2253.1138        | 1127.0608        | 23 | I  | 11 | 1252.7014        | 626.8546         | 418.2390         |
| 2382.1564        | 1191.5821        | 24 | E  | 10 | 1139.6173        | <b>570.3126</b>  | 380.5443         |
| 2453.1935        | 1227.1007        | 25 | A  | 9  | 1010.5747        | 505.7913         | 337.5301         |
| 2566.2776        | 1283.6427        | 26 | L  | 8  | 939.5376         | 470.2727         | 313.8511         |
| 2667.3253        | 1334.1665        | 27 | T  | 7  | 826.4535         | 413.7307         | 276.1564         |
| 2768.3729        | 1384.6904        | 28 | T  | 6  | 725.4058         | 363.2068         | 242.4738         |
| 2839.4101        | <b>1420.2089</b> | 29 | A  | 5  | 624.3582         | 312.6830         | 208.7913         |
| 2976.4690        | 1488.7384        | 30 | H  | 4  | <b>553.3211</b>  | 277.1644         | 185.1122         |
| 3104.5275        | 1552.7671        | 31 | Q  | 3  | 416.2621         | 208.6350         | 139.4259         |
| 3217.6116        | 1609.3097        | 32 | I  | 2  | 288.2036         | 144.6057         | 96.7397          |
|                  |                  | 33 | R  | 1  | 175.1195         | 88.0637          | 59.0451          |

ANADVHHISGHDGGTGASPK, MH+ 1889.9106, m/z 630.6417  
08182008\_HmS2\_07\_2\_0973.0973.3.dta

scan 973; 2.3e+01

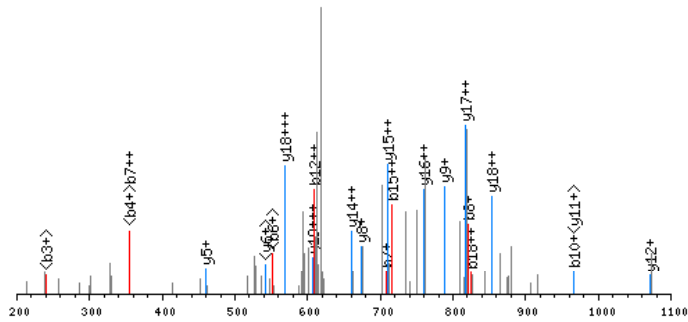

click image to zoom in; click top corners to zoom out [precursor]

## rrnAC0169 ANADVHHISGHDGGTGASPK

| Peptide prob. | Precursor charge | Calc neutral pep mass | Precursor neutral mass | Mass difference | Xcorr | Deltaen |
|---------------|------------------|-----------------------|------------------------|-----------------|-------|---------|
| 1             | 3                | 1888.9                | 1889.9                 | 1.0033          | 2.662 | 0.283   |

ANADVHHISGHDGGTGASPK, MH+ 1889.9106, m/z 630.6417  
08182008\_HmS2\_07\_2\_0973.0973.3.dta

scan 973; 2.3e+01

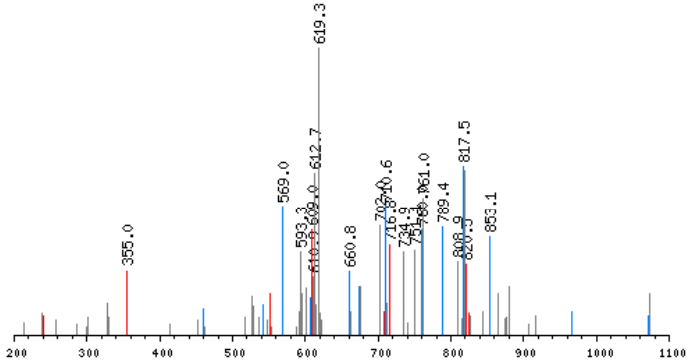

click image to zoom in; click top corners to zoom out [precursor]

| b <sup>+</sup>  | b <sup>2+</sup> | #  | AA | #  | y <sup>+</sup>   | y <sup>2+</sup> | y <sup>3+</sup> |
|-----------------|-----------------|----|----|----|------------------|-----------------|-----------------|
| 72.0449         | 36.5264         | 1  | A  | 20 |                  |                 |                 |
| 186.0879        | 93.5478         | 2  | N  | 19 | 1818.8735        | 909.9406        | <b>606.9630</b> |
| 257.1250        | 129.0664        | 3  | A  | 18 | 1704.8305        | <b>852.9192</b> | <b>568.9487</b> |
| 372.1519        | 186.5799        | 4  | D  | 17 | 1633.7934        | <b>817.4006</b> | 545.2697        |
| 471.2203        | 236.1141        | 5  | Y  | 16 | 1518.7665        | <b>759.8872</b> | 506.9274        |
| 570.2888        | 285.6483        | 6  | V  | 15 | 1419.6981        | <b>710.3529</b> | 473.9046        |
| <b>707.3477</b> | <b>354.1777</b> | 7  | H  | 14 | 1320.6297        | <b>660.8187</b> | 440.8818        |
| <b>820.4317</b> | 410.7198        | 8  | I  | 13 | 1183.5707        | 592.2893        | 395.1955        |
| 907.4638        | 454.2358        | 9  | S  | 12 | <b>1070.4867</b> | 535.7473        | 357.5008        |
| <b>964.4852</b> | 482.7465        | 10 | G  | 11 | 983.4546         | 492.2312        | 328.4901        |
| 1101.5441       | 551.2760        | 11 | H  | 10 | 926.4332         | 463.7205        | 309.4829        |
| 1216.5711       | <b>608.7894</b> | 12 | D  | 9  | <b>789.3743</b>  | 395.1910        | 263.7966        |
| 1273.5925       | 637.3002        | 13 | G  | 8  | <b>674.3473</b>  | 337.6776        | 225.4543        |
| 1330.6140       | 665.8109        | 14 | G  | 7  | 617.3259         | 309.1668        | 206.4472        |
| 1431.6617       | <b>716.3348</b> | 15 | T  | 6  | 560.3044         | 280.6561        | 187.4400        |
| 1488.6831       | 744.8455        | 16 | G  | 5  | <b>459.2567</b>  | 230.1323        | 153.7575        |
| 1559.7203       | 780.3640        | 17 | A  | 4  | 402.2353         | 201.6215        | 134.7503        |
| 1646.7523       | <b>823.8801</b> | 18 | S  | 3  | 331.1981         | 166.1030        | 111.0713        |
| 1743.8050       | 872.4064        | 19 | P  | 2  | 244.1661         | 122.5870        | 82.0606         |
|                 |                 | 20 | K  | 1  | 147.1134         | 74.0606         | 49.7097         |

VAHTLYEAGASEYAR, MH+ 1637.7924, m/z 546.6023  
08182008\_ImmS2\_07\_4.1573.1573.3.dta

scan 1573; 9.8e+02

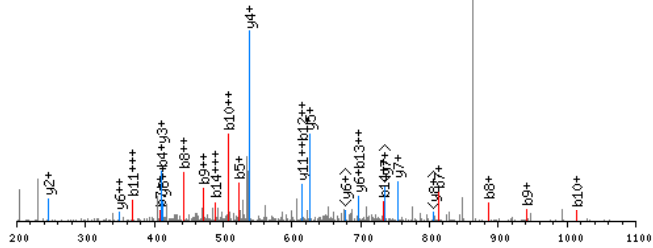

click image to zoom in; click top corners to zoom out [\[precursor±\]](#)

## pNG7330 VAHTLYEAGASEYAR

| Peptide prob. | Precursor charge | Calc neutral pep mass | Precursor neutral mass | Mass difference | Xcorr | Deltaen |
|---------------|------------------|-----------------------|------------------------|-----------------|-------|---------|
| 1             | 3                | 1636.8                | 1636.8                 | -0.0064         | 3.073 | 0.371   |

VAHTLYEAGASEYAR, MH+ 1637.7924, m/z 546.6023  
08182008\_ImmS2\_07\_4.1573.1573.3.dta

scan 1573; 9.8e+02

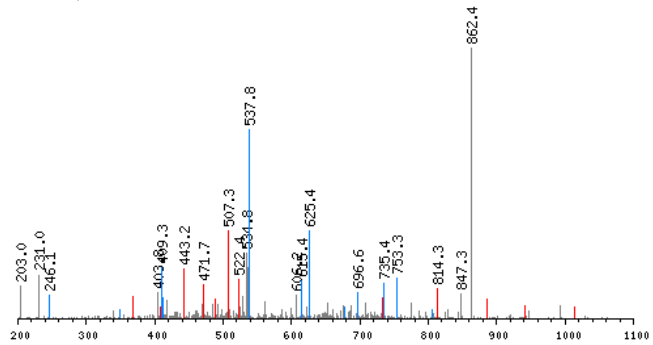

click image to zoom in; click top corners to zoom out [\[precursor±\]](#)

| b <sup>+</sup> | b <sup>2+</sup> | b <sup>3+</sup> | #  | AA | #  | y <sup>+</sup> | y <sup>2+</sup> | y <sup>3+</sup> |
|----------------|-----------------|-----------------|----|----|----|----------------|-----------------|-----------------|
| 100.0762       | 50.5420         | 34.0306         | 1  | V  | 15 |                |                 |                 |
| 171.1134       | 86.0606         | 57.7097         | 2  | A  | 14 | 1538.7239      | 769.8659        | 513.5799        |
| 308.1723       | 154.5900        | 103.3960        | 3  | I  | 13 | 1467.6868      | 734.3473        | 489.9008        |
| 409.2199       | 205.1139        | 137.0785        | 4  | T  | 12 | 1330.6279      | 665.8179        | 444.2145        |
| 522.3040       | 261.6559        | 174.7732        | 5  | L  | 11 | 1229.5802      | 615.2940        | 410.5320        |
| 685.3673       | 343.1876        | 229.1277        | 6  | Y  | 10 | 1116.4962      | 558.7520        | 372.8373        |
| 814.4099       | 407.7089        | 272.1419        | 7  | E  | 9  | 953.4328       | 477.2203        | 318.4828        |
| 885.4470       | 443.2274        | 295.8209        | 8  | A  | 8  | 824.3903       | 412.6990        | 275.4686        |
| 942.4685       | 471.7382        | 314.8281        | 9  | G  | 7  | 753.3531       | 377.1805        | 251.7896        |
| 1013.5056      | 507.2567        | 338.5071        | 10 | A  | 6  | 696.3317       | 348.6698        | 232.7824        |
| 1100.5376      | 550.7727        | 367.5178        | 11 | S  | 5  | 625.2946       | 313.1512        | 209.1034        |
| 1229.5802      | 615.2940        | 410.5320        | 12 | E  | 4  | 538.2625       | 269.6352        | 180.0927        |
| 1392.6436      | 696.8257        | 464.8864        | 13 | Y  | 3  | 409.2199       | 205.1139        | 137.0785        |
| 1463.6807      | 732.3443        | 488.5654        | 14 | A  | 2  | 246.1566       | 123.5822        | 82.7241         |
|                |                 |                 | 15 | R  | 1  | 175.1195       | 88.0637         | 59.0451         |

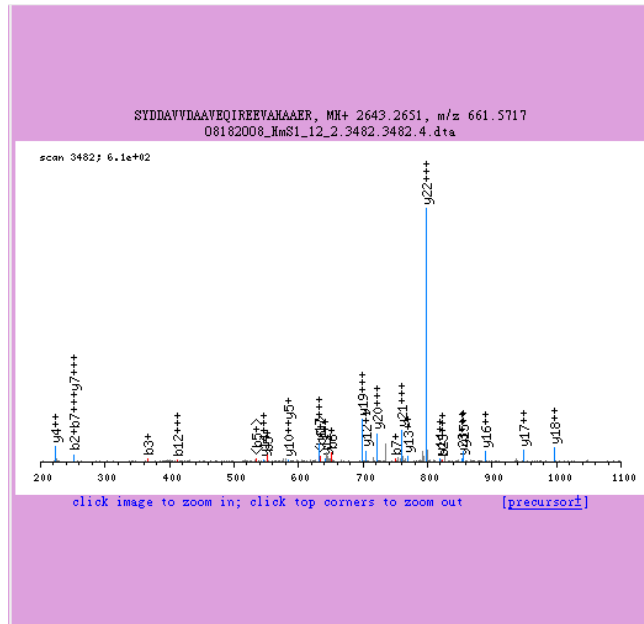

## pNG7248

### SYDDAVVDAAVEQIREEVAAHAAER

| Peptide prob. | Precursor charge | Calc neutral pep mass | Precursor neutral mass | Mass difference | Xcorr | Deltacn |
|---------------|------------------|-----------------------|------------------------|-----------------|-------|---------|
| 0.999         | 4                | 2642.3                | 2642.3                 | 0.0077          | 2.584 | 0.176   |

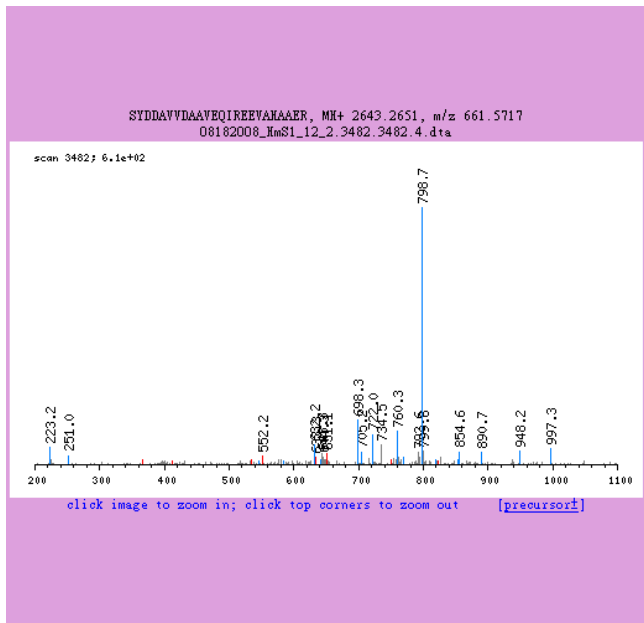

| b <sup>+</sup>  | b <sup>2+</sup> | b <sup>3+</sup> | #  | AA | #  | y <sup>+</sup>  | y <sup>2+</sup> | y <sup>3+</sup> |
|-----------------|-----------------|-----------------|----|----|----|-----------------|-----------------|-----------------|
| 88.0399         | 44.5238         | 30.0185         | 1  | S  | 24 |                 |                 |                 |
| <b>251.1032</b> | 126.0555        | 84.3729         | 2  | Y  | 23 | 2556.2330       | 1278.6204       | <b>852.7496</b> |
| <b>366.1301</b> | 183.5690        | 122.7153        | 3  | D  | 22 | 2393.1697       | 1197.0888       | <b>798.3951</b> |
| 481.1571        | 241.0824        | 161.0576        | 4  | D  | 21 | 2278.1428       | 1139.5753       | <b>760.0528</b> |
| <b>552.1942</b> | 276.6010        | 184.7366        | 5  | A  | 20 | 2163.1158       | 1082.0618       | <b>721.7105</b> |
| <b>651.2626</b> | 326.1352        | 217.7594        | 6  | Y  | 19 | 2092.0787       | 1046.5433       | <b>698.0315</b> |
| <b>750.3310</b> | 375.6694        | <b>250.7822</b> | 7  | Y  | 18 | 1993.0103       | <b>997.0091</b> | 665.0086        |
| 865.3580        | 433.1829        | 289.1245        | 8  | D  | 17 | 1893.9419       | <b>947.4749</b> | <b>631.9858</b> |
| 936.3951        | 468.7014        | 312.8036        | 9  | A  | 16 | 1778.9149       | <b>889.9614</b> | 593.6435        |
| 1007.4322       | 504.2200        | 336.4826        | 10 | A  | 15 | 1707.8778       | <b>854.4428</b> | 569.9645        |
| 1106.5006       | 553.7542        | 369.5054        | 11 | Y  | 14 | 1636.8407       | <b>818.9243</b> | <b>546.2855</b> |
| 1235.5432       | 618.2755        | <b>412.5196</b> | 12 | E  | 13 | 1537.7723       | <b>769.3901</b> | 513.2626        |
| 1363.6018       | 682.3048        | 455.2058        | 13 | Q  | 12 | 1408.7297       | <b>704.8688</b> | 470.2485        |
| 1476.6858       | 738.8468        | 492.9005        | 14 | I  | 11 | 1280.6711       | <b>640.8395</b> | 427.5623        |
| 1632.7869       | 816.8974        | 544.9342        | 15 | R  | 10 | 1167.5871       | <b>584.2974</b> | 389.8676        |
| 1761.8295       | 881.4187        | 587.9484        | 16 | E  | 9  | 1011.4859       | 506.2469        | 337.8339        |
| 1890.8721       | 945.9400        | 630.9626        | 17 | E  | 8  | 882.4434        | 441.7256        | 294.8197        |
| 1989.9405       | 995.4742        | 663.9854        | 18 | V  | 7  | 753.4008        | 377.2043        | <b>251.8055</b> |
| 2060.9777       | 1030.9927       | 687.6644        | 19 | A  | 6  | 654.3323        | 327.6701        | 218.7827        |
| 2198.0366       | 1099.5222       | 733.3507        | 20 | H  | 5  | <b>583.2952</b> | 292.1515        | 195.1036        |
| 2269.0737       | 1135.0408       | 757.0298        | 21 | A  | 4  | 446.2363        | <b>223.6221</b> | 149.4173        |
| 2340.1108       | 1170.5593       | 780.7088        | 22 | A  | 3  | 375.1992        | 188.1035        | 125.7383        |
| 2469.1534       | 1235.0806       | <b>823.7230</b> | 23 | E  | 2  | 304.1621        | 152.5850        | 102.0592        |
|                 |                 |                 | 24 | R  | 1  | 175.1195        | 88.0637         | 59.0451         |
